# Supplementary material for: Declines of peatland water table forces climate warming despite methane emission drawdown
Source: Research Square preprint supplement (doi:10.21203/rs.3.rs-2839705/v1), 2023-05-08
Supplement: Supplementary file 1 [file 0f66382c2cb67563c4409cae.xlsx]

## Sheet: Nongrowing season flux of NEE
ID	References	Treatment	Purpose	Climatic conditions	Wetland type	Nutrient supply type	Microtopography	Permanently/seasonally flooded	Function group	Peat depth (m) in pristine wetland	N rate (kg N ha-1) in drained wetland	Biomass/manure application (t ha-1) in drained wetland	Country	Latitude (°, N)	Longitude (°, E)	Latitude (°, N)	Longitude (°, E)	Altitude (m)	MAT ( °C)	MAP (mm)	Climatic conditions	Drainage duration (years)	Drainage intensity	Wetland type	Nutrient supply type	Microtopography	Permanently/seasonally flooded	Dominant plant species in prestine wetland	Function group	Measurement period	Season	Dry/wet	Measurement frequency	Method	Soil CO2 emission	Control	SD	n	Treatment	SD	n	NPP	Control	SD	n	Treatment	SD	n	Annual GPP
1	Strack and Zuback, 2013	Drainage	Cropland	Boreal	Peatland (bog)	ombrotrophic	overall	seasonally	Peat moss	/	0	0	Canada	47.967	-69.429	47.9671°	69.4285° W	/	5.2	886	Boreal	38	/	Peatland (bog)	ombrotrophic	overall	seasonally	Mosses	Peat moss	2010/05-2011/03	Annual	/	5 times per month	Field, Chamber		/	/	/	/	/	/		/	/	/	/	/	/
2	Lohila et al. 2011	Drainage	Forestry	Boreal	Peatland (bog)	ombrotrophic	overall	seasonally	Peat moss	2.2	0	0	Finland	60.647	24.356	60°38′49″	24°21′23″	/	4.4	627	Boreal	35	/	Peatland (bog)	ombrotrophic	overall	seasonally	Pleurozium schreberi, Dicranum polysetum	Peat moss	2004/07-2005/07	Annual	/	biweekly	Field, Chamber		/	/	/	/	/	/		/	/	/	/	/	/	kg ha-1 yr-1
3	Järveoja et al. 2016	Drainage	Peat mining	Temperate	Peatland (bog)	ombrotrophic	overall	seasonally	Peat moss	2.5	0	0	Estonia	58.538	25.862	58°32′16″	25°51′43″	/	7.2	784	Temperate	34	/	Peatland (bog)	ombrotrophic	overall	seasonally	Sphagnum fuscum, Sphagnum rubellum and Sphagnum magellanicum	Peat moss	2014/03-2015/03	Annual	/	biweekly	Field, Chamber		/	/	/	/	/	/		/	/	/	/	/	/
4	Hommeltenberg et al. 2014	Pristine	Pristine	Temperate	Peatland (bog)	ombrotrophic	overall	seasonally	Peat moss	5.1	0	0	Germany	47.806	11.328	47°48'23"	11°19'41"	590	/	/	Temperate	/	/	Peatland (bog)	ombrotrophic	overall	seasonally	Sphagnum spp.	Peat moss	2012	Annual	/	Half-hourly to daily	EC		/	/	/	/	/	/		/	/	/	/	/	/
5	Kittler et al. 2017	Drainage	Climate drying	Boreal	Peatland (fen)	minerotrophic	overall	seasonally	Cyperaceae	0.2	0	0	Russia	68.75	161.33	68.75°	161.33°	/	-10.2	160	Boreal	13	/	Peatland (fen)	minerotrophic	overall	seasonally	Carex appendiculata	Cyperaceae	2013	Annual	/	EC	Half-hourly to daily		/	/	/	/	/	/		/	/	/	/	/	/
6	Kittler et al. 2017	Drainage	Climate drying	Boreal	Peatland (fen)	minerotrophic	overall	seasonally	Cyperaceae	0.2	0	0	Russia	68.75	161.33	68.75°	161.33°	/	-10.2	160	Boreal	14	/	Peatland (fen)	minerotrophic	overall	seasonally	Carex appendiculata	Cyperaceae	2014	Annual	/	EC	Half-hourly to daily		/	/	/	/	/	/		/	/	/	/	/	/
7	Kittler et al. 2017	Drainage	Climate drying	Boreal	Peatland (fen)	minerotrophic	overall	seasonally	Cyperaceae	0.2	0	0	Russia	68.75	161.33	68.75°	161.33°	/	-10.2	160	Boreal	15	/	Peatland (fen)	minerotrophic	overall	seasonally	Carex appendiculata	Cyperaceae	2015	Annual	/	EC	Half-hourly to daily		/	/	/	/	/	/		/	/	/	/	/	/
8	Kittler et al. 2017	Drainage	Climate drying	Boreal	Peatland (fen)	minerotrophic	overall	seasonally	Cyperaceae	0.2	0	0	Russia	68.75	161.33	68.75°	161.33°	/	-10.2	160	Boreal	16	/	Peatland (fen)	minerotrophic	overall	seasonally	Carex appendiculata	Cyperaceae	2016	Annual	/	EC	Half-hourly to daily		/	/	/	/	/	/		/	/	/	/	/	/
9	Chu et al. 2014	Pristine	Pristine	Temperate	Marsh	minerotrophic	overall	permanently	Graminoid	/	0	0	USA	41.464	-82.996	41°27'51"	82°59'45" W	/	12.1	1269	Temperate	/	/	Marsh	minerotrophic	overall	permanently	Typha angustifolia	Graminoid	2011	Annual	/	Half-hourly to daily	EC		/	/	/	/	/	/		/	/	/	/	/	/	kg ha-1 yr-1
10	Chu et al. 2014	Pristine	Pristine	Temperate	Marsh	minerotrophic	overall	permanently	Graminoid	/	0	0	USA	41.464	-81.996	41°27'51"	82°59'45" W	/	11.9	/	Temperate	/	/	Marsh	minerotrophic	overall	permanently	Typha angustifolia	Graminoid	2012	Annual	/	Half-hourly to daily	EC		/	/	/	/	/	/		/	/	/	/	/	/	kg ha-1 yr-1
11	Jammet et al. 2017	Pristine	Pristine	Boreal	Peatland (fen)	minerotrophic	overall	seasonally	Cyperaceae	/	0	0	Sweden	68.333	19.05	68°20'	19°03'	/	-0.3	/	Boreal	/	/	Peatland (fen)	minerotrophic	overall	seasonally	Carex rostrata, Eriophorium angustifolium	Cyperaceae	2012–2013	Annual	/	Half-hourly to daily	EC		/	/	/	/	/	/		/	/	/	/	/	/
12	Jammet et al. 2017	Pristine	Pristine	Boreal	Peatland (fen)	minerotrophic	overall	seasonally	Cyperaceae	/	0	0	Sweden	68.333	19.05	68°20'	19°03'	/	0.9	/	Boreal	/	/	Peatland (fen)	minerotrophic	overall	seasonally	Carex rostrata, Eriophorium angustifolium	Cyperaceae	2013-2014	Annual	/	Half-hourly to daily	EC		/	/	/	/	/	/		/	/	/	/	/	/
13	Berger et al. 2019	Pristine	Pristine	Temperate	Peatland (bog)	ombrotrophic	overall	seasonally	Peat moss	/	0	0	Canada	43.919	-80.405	43° 55′9.67″	80° 24′ 18.66″W	/	6.6	905	Temperate	/	/	Peatland (bog)	ombrotrophic	overall	seasonally	Sphagnum magellanicum	Peat moss	No	Annual	/	biweekly	Field, Chamber		/	/	/	/	/	/		/	/	/	/	/	/
14	Peichl et al. 2014	Drainage	Climate drying	Boreal	Peatland (fen)	ombrotrophic	overall	seasonally	Cyperaceae	3.5	0	0	Sweden	64.183	19.55	64°11′	19°33′	270	1.8	888	Boreal	/	/	Peatland (fen)	ombrotrophic	overall	seasonally	Eriophorum vaginatum	Cyperaceae	2001	Annual	/	Half-hourly to daily	EC		/	/	/	/	/	/		/	/	/	/	/	/	kg ha-1 yr-1
15	Peichl et al. 2014	Drainage	Climate drying	Boreal	Peatland (fen)	ombrotrophic	overall	seasonally	Cyperaceae	3.5	0	0	Sweden	64.183	19.55	64°11′	19°33′	270	2.9	533	Boreal	/	/	Peatland (fen)	ombrotrophic	overall	seasonally	Eriophorum vaginatum	Cyperaceae	2002	Annual	/	Half-hourly to daily	EC		/	/	/	/	/	/		/	/	/	/	/	/	kg ha-1 yr-1
16	Peichl et al. 2014	Drainage	Climate drying	Boreal	Peatland (fen)	ombrotrophic	overall	seasonally	Cyperaceae	3.5	0	0	Sweden	64.183	19.55	64°11′	19°33′	270	2.3	584	Boreal	/	/	Peatland (fen)	ombrotrophic	overall	seasonally	Eriophorum vaginatum	Cyperaceae	2003	Annual	/	Half-hourly to daily	EC		/	/	/	/	/	/		/	/	/	/	/	/	kg ha-1 yr-1
17	Peichl et al. 2014	Drainage	Climate drying	Boreal	Peatland (fen)	ombrotrophic	overall	seasonally	Cyperaceae	3.5	0	0	Sweden	64.183	19.55	64°11′	19°33′	270	0.9	650	Boreal	/	/	Peatland (fen)	ombrotrophic	overall	seasonally	Eriophorum vaginatum	Cyperaceae	2004	Annual	/	Half-hourly to daily	EC		/	/	/	/	/	/		/	/	/	/	/	/	kg ha-1 yr-1
18	Peichl et al. 2014	Drainage	Climate drying	Boreal	Peatland (fen)	ombrotrophic	overall	seasonally	Cyperaceae	3.5	0	0	Sweden	64.183	19.55	64°11′	19°33′	270	3.1	659	Boreal	/	/	Peatland (fen)	ombrotrophic	overall	seasonally	Eriophorum vaginatum	Cyperaceae	2005	Annual	/	Half-hourly to daily	EC		/	/	/	/	/	/		/	/	/	/	/	/	kg ha-1 yr-1
19	Peichl et al. 2014	Drainage	Climate drying	Boreal	Peatland (fen)	ombrotrophic	overall	seasonally	Cyperaceae	3.5	0	0	Sweden	64.183	19.55	64°11′	19°33′	270	3.1	661	Boreal	/	/	Peatland (fen)	ombrotrophic	overall	seasonally	Eriophorum vaginatum	Cyperaceae	2006	Annual	/	Half-hourly to daily	EC		/	/	/	/	/	/		/	/	/	/	/	/	kg ha-1 yr-1
20	Peichl et al. 2014	Drainage	Climate drying	Boreal	Peatland (fen)	ombrotrophic	overall	seasonally	Cyperaceae	3.5	0	0	Sweden	64.183	19.55	64°11′	19°33′	270	2.8	586	Boreal	/	/	Peatland (fen)	ombrotrophic	overall	seasonally	Eriophorum vaginatum	Cyperaceae	2007	Annual	/	Half-hourly to daily	EC		/	/	/	/	/	/		/	/	/	/	/	/	kg ha-1 yr-1
21	Peichl et al. 2014	Drainage	Climate drying	Boreal	Peatland (fen)	ombrotrophic	overall	seasonally	Cyperaceae	3.5	0	0	Sweden	64.183	19.55	64°11′	19°33′	270	2.8	751	Boreal	/	/	Peatland (fen)	ombrotrophic	overall	seasonally	Eriophorum vaginatum	Cyperaceae	2008	Annual	/	Half-hourly to daily	EC		/	/	/	/	/	/		/	/	/	/	/	/	kg ha-1 yr-1
22	Peichl et al. 2014	Drainage	Climate drying	Boreal	Peatland (fen)	ombrotrophic	overall	seasonally	Cyperaceae	3.5	0	0	Sweden	64.183	19.55	64°11′	19°33′	270	2	702	Boreal	/	/	Peatland (fen)	ombrotrophic	overall	seasonally	Eriophorum vaginatum	Cyperaceae	2009	Annual	/	Half-hourly to daily	EC		/	/	/	/	/	/		/	/	/	/	/	/	kg ha-1 yr-1
23	Peichl et al. 2014	Drainage	Climate drying	Boreal	Peatland (fen)	ombrotrophic	overall	seasonally	Cyperaceae	3.5	0	0	Sweden	64.183	19.55	64°11′	19°33′	270	0.4	639	Boreal	/	/	Peatland (fen)	ombrotrophic	overall	seasonally	Eriophorum vaginatum	Cyperaceae	2010	Annual	/	Half-hourly to daily	EC		/	/	/	/	/	/		/	/	/	/	/	/	kg ha-1 yr-1
24	Peichl et al. 2014	Drainage	Climate drying	Boreal	Peatland (fen)	ombrotrophic	overall	seasonally	Cyperaceae	3.5	0	0	Sweden	64.183	19.55	64°11′	19°33′	270	3.5	707	Boreal	/	/	Peatland (fen)	ombrotrophic	overall	seasonally	Eriophorum vaginatum	Cyperaceae	2011	Annual	/	Half-hourly to daily	EC		/	/	/	/	/	/		/	/	/	/	/	/	kg ha-1 yr-1
25	Peichl et al. 2014	Drainage	Climate drying	Boreal	Peatland (fen)	ombrotrophic	overall	permanently	Cyperaceae	3.5	0	0	Sweden	64.183	19.55	64°11′	19°33′	270	1.9	630	Boreal	/	/	Peatland (fen)	ombrotrophic	overall	permanently	Eriophorum vaginatum	Cyperaceae	2012	Annual	/	Half-hourly to daily	EC		/	/	/	/	/	/		/	/	/	/	/	/	kg ha-1 yr-1
26	Strilesky and Humphreys, 2012	Pristine	Pristine	Boreal	Peatland (bog)	ombrotrophic	overall	permanently	Cyperaceae	3.4	0	0	Canada	45.409	75.519	45°24′33.99″	75°31′07.35″	/	6.7	871	Boreal	/	/	Peatland (bog)	ombrotrophic	overall	permanently	Sphagnum capillifolium and Sphagnum fuscum	Cyperaceae	2006/11/01-2007-10/31	Annual	/	Half-hourly to daily	EC		/	/	/	/	/	/		/	/	/	/	/	/
27	Strilesky and Humphreys, 2012	Pristine	Pristine	Boreal	Peatland (bog)	ombrotrophic	overall	permanently	Cyperaceae	4.4	0	0	Canada	45.409	75.519	45°24′24.79″	75°29′03.75″	/	6.5	943	Boreal	/	/	Peatland (bog)	ombrotrophic	overall	permanently	Sphagnum capillifolium and Sphagnum fuscum	Cyperaceae	2006/11/01-2007-10/31	Annual	/	Half-hourly to daily	EC		/	/	/	/	/	/		/	/	/	/	/	/
28	Cao et al. 2017	Pristine	Pristine	Temperate	Marsh	minerotrophic	overall	seasonally	Cyperaceae	/	0	0	China	36.533	99.6	36°32′	99°36′	3194	1.2	357	Temperate	/	/	Marsh	minerotrophic	overall	seasonally	Carex tristachya, Blysmus sinocompressus and Kobresia tibetica	Cyperaceae	2011/06-2012-06	Annual	/	Half-hourly to daily	EC		/	/	/	/	/	/		/	/	/	/	/	/	kg ha-1 yr-1
29	Cao et al. 2017	Pristine	Pristine	Temperate	Marsh	minerotrophic	overall	seasonally	Cyperaceae	/	0	0	China	36.533	99.6	36°32′	99°36′	3194	1.2	357	Temperate	/	/	Marsh	minerotrophic	overall	seasonally	Carex tristachya, Blysmus sinocompressus and Kobresia tibetica	Cyperaceae	2012/06-2013/06	Annual	/	Half-hourly to daily	EC		/	/	/	/	/	/		/	/	/	/	/	/	kg ha-1 yr-1
30	Aurela et al. 2002	Pristine	Pristine	Boreal	Peatland (fen)	mesotrophic	overall	seasonally	Cyperaceae	1	0	0	Finland	69.133	27.283	69°08′	27°17′	155	-2.225	597.6	Boreal	/	/	Peatland (fen)	mesotrophic	overall	seasonally	Carex spp.	Cyperaceae	1998/04-1999/04	Annual	/	Half-hourly to daily	EC		/	/	/	/	/	/		/	/	/	/	/	/	kg ha-1 yr-1
31	Sagerfors et al. 2008	Pristine	Pristine	Boreal	Peatland (bog)	ombrotrophic	overall	seasonally	Cyperaceae	3.5	0	0	Sweden	64.183	19.55	64°11′	19°33′	270	1.2	523	Boreal	/	/	Peatland (bog)	ombrotrophic	overall	seasonally	Eriophorum vaginatum	Cyperaceae	2001	Annual	/	Half-hourly to daily	EC		/	/	/	/	/	/		/	/	/	/	/	/
32	Sagerfors et al. 2008	Pristine	Pristine	Boreal	Peatland (bog)	ombrotrophic	overall	seasonally	Cyperaceae	3.5	0	0	Sweden	64.183	19.55	64°11′	19°33′	270	1.2	523	Boreal	/	/	Peatland (bog)	ombrotrophic	overall	seasonally	Eriophorum vaginatum	Cyperaceae	2002	Annual	/	Half-hourly to daily	EC		/	/	/	/	/	/		/	/	/	/	/	/
33	Sagerfors et al. 2008	Pristine	Pristine	Boreal	Peatland (bog)	ombrotrophic	overall	seasonally	Cyperaceae	3.5	0	0	Sweden	64.183	19.55	64°11′	19°33′	270	1.2	523	Boreal	/	/	Peatland (bog)	ombrotrophic	overall	seasonally	Eriophorum vaginatum	Cyperaceae	2003	Annual	/	Half-hourly to daily	EC		/	/	/	/	/	/		/	/	/	/	/	/
34	Lafleur et al. 2001	Pristine	Pristine	Temperate	Peatland (bog)	ombrotrophic	overall	seasonally	Peat moss	2	0	0	Canada	45.4	-75.5	45°24′	75°30′W	70	5.8	910	Temperate	/	/	Peatland (bog)	ombrotrophic	overall	seasonally	Sphagnuma ngustifoliu	Peat moss	1998/06/01-1999/05/31	Annual	/	Half-hourly to daily	EC		/	/	/	/	/	/		/	/	/	/	/	/	kg ha-1 yr-1
35	Heikkinen et al. 2002	Pristine	Pristine	Boreal	Peatland (bog)	minerotrophic	hollow	seasonally	Peat moss	/	0	0	Russia	67.383	63.367	67°23′	63°22′	/	-6	548	Boreal	/	/	Peatland (bog)	minerotrophic	hollow	seasonally	Sphagnum capillifolium	Peat moss	1999	Annual	/	weekly	Field, Chamber		/	/	/	/	/	/		/	/	/	/	/	/
36	Heikkinen et al. 2002	Pristine	Pristine	Boreal	Peatland (bog)	minerotrophic	hollow	seasonally	Peat moss	/	0	0	Russia	67.383	63.367	67°23′	63°22′	/	-6	548	Boreal	/	/	Peatland (bog)	minerotrophic	hollow	seasonally	E. russeolum	Peat moss	1999	Annual	/	weekly	Field, Chamber		/	/	/	/	/	/		/	/	/	/	/	/
37	Heikkinen et al. 2002	Pristine	Pristine	Boreal	Peatland (bog)	minerotrophic	lawn	seasonally	Peat moss	/	0	0	Russia	67.383	63.367	67°23′	63°22′	/	-6	548	Boreal	/	/	Peatland (bog)	minerotrophic	lawn	seasonally	Sphagnum balticum	Peat moss	1999	Annual	/	weekly	Field, Chamber		/	/	/	/	/	/		/	/	/	/	/	/
38	Heikkinen et al. 2002	Pristine	Pristine	Boreal	Peatland (bog)	minerotrophic	lawn	seasonally	Peat moss	/	0	0	Russia	67.383	63.367	67°23′	63°22′	/	-6	548	Boreal	/	/	Peatland (bog)	minerotrophic	lawn	seasonally	Sphagnum balticum	Peat moss	1999	Annual	/	weekly	Field, Chamber		/	/	/	/	/	/		/	/	/	/	/	/
39	Heikkinen et al. 2002	Pristine	Pristine	Boreal	Peatland (bog)	ombrotrophic	hummock	seasonally	Shrub	/	0	0	Russia	67.383	63.367	67°23′	63°22′	/	-6	548	Boreal	/	/	Peatland (bog)	ombrotrophic	hummock	seasonally	Empetrum nicrum	Shrub	1999	Annual	/	weekly	Field, Chamber		/	/	/	/	/	/		/	/	/	/	/	/
40	Strachan et al. 2015	Pristine	Pristine	Temperate	Marsh	minerotrophic	overall	seasonally	Graminoid	/	0	0	Canada	45.4	-75.5	45°24′	75°30′W	/	6	944	Temperate	/	/	Marsh	minerotrophic	overall	seasonally	Typha angustifolia	Graminoid	2005	Annual	/	Half-hourly to daily	EC		/	/	/	/	/	/		/	/	/	/	/	/
41	Strachan et al. 2015	Pristine	Pristine	Temperate	Marsh	minerotrophic	overall	seasonally	Graminoid	/	0	0	Canada	45.4	-75.5	45°24′	75°30′W	/	6	944	Temperate	/	/	Marsh	minerotrophic	overall	seasonally	Typha angustifolia	Graminoid	2006	Annual	/	Half-hourly to daily	EC		/	/	/	/	/	/		/	/	/	/	/	/
42	Strachan et al. 2015	Pristine	Pristine	Temperate	Marsh	minerotrophic	overall	seasonally	Graminoid	/	0	0	Canada	45.4	-75.5	45°24′	75°30′W	/	6	944	Temperate	/	/	Marsh	minerotrophic	overall	seasonally	Typha angustifolia	Graminoid	2007	Annual	/	Half-hourly to daily	EC		/	/	/	/	/	/		/	/	/	/	/	/
43	Strachan et al. 2015	Pristine	Pristine	Temperate	Marsh	minerotrophic	overall	seasonally	Graminoid	/	0	0	Canada	45.4	-75.5	45°24′	75°30′W	/	6	944	Temperate	/	/	Marsh	minerotrophic	overall	seasonally	Typha angustifolia	Graminoid	2008	Annual	/	Half-hourly to daily	EC		/	/	/	/	/	/		/	/	/	/	/	/
44	Strachan et al. 2015	Pristine	Pristine	Temperate	Marsh	minerotrophic	overall	seasonally	Graminoid	/	0	0	Canada	45.4	-75.5	45°24′	75°30′W	/	6	944	Temperate	/	/	Marsh	minerotrophic	overall	seasonally	Typha angustifolia	Graminoid	2009	Annual	/	Half-hourly to daily	EC		/	/	/	/	/	/		/	/	/	/	/	/
45	Marushchak et al. 2013	Pristine	Pristine	Boreal	Peatland (bog)	ombrotrophic	overall	seasonally	Peat moss	/	0	0	Russia	67.05	62.933	67°03′	62°56′	/	-5.6	501	Boreal	/	/	Peatland (bog)	ombrotrophic	overall	seasonally	Lichen and moss	Peat moss	2007/10-2008/10	Annual	/	Half-hourly to daily	EC		/	/	/	/	/	/		/	/	/	/	/	/	kg ha-1 yr-1
46	Aurela et al. 2009	Pristine	Pristine	Boreal	Peatland (fen)	minerotrophic	overall	seasonally	Shrub	3	0	0	Finland	67.997	64.353	67°59.832′	64°12.551′	269	0.1	525	Boreal	/	/	Peatland (fen)	minerotrophic	overall	seasonally	Betula nana	Shrub	2006	Annual	/	Half-hourly to daily	EC		/	/	/	/	/	/		/	/	/	/	/	/	kg ha-1 yr-1
47	Aurela et al. 2009	Pristine	Pristine	Boreal	Peatland (fen)	minerotrophic	overall	seasonally	Shrub	3	0	0	Finland	67.997	64.353	67°59.832′	64°12.551′	269	0.2	578	Boreal	/	/	Peatland (fen)	minerotrophic	overall	seasonally	Betula nana	Shrub	2007	Annual	/	Half-hourly to daily	EC		/	/	/	/	/	/		/	/	/	/	/	/	kg ha-1 yr-1
48	Aurela et al. 2009	Pristine	Pristine	Boreal	Peatland (fen)	minerotrophic	overall	seasonally	Shrub	3	0	0	Finland	67.997	64.353	67°59.832′	64°12.551′	269	-0.2	605	Boreal	/	/	Peatland (fen)	minerotrophic	overall	seasonally	Betula nana	Shrub	2008	Annual	/	Half-hourly to daily	EC		/	/	/	/	/	/		/	/	/	/	/	/	kg ha-1 yr-1
49	Pullens et al. 2016	Pristine	Pristine	Temperate	Peatland (fen)	minerotrophic	overall	seasonally	Peat moss	/	0	0	Italy	46.017	11.041	46°01′03″	11°02′27″	1563	5.4	1290	Temperate	/	/	Peatland (fen)	minerotrophic	overall	seasonally	Molinia caerula	Peat moss	2012	Annual	/	Half-hourly to daily	EC		/	/	/	/	/	/		/	/	/	/	/	/	kg ha-1 yr-1
50	Pullens et al. 2016	Pristine	Pristine	Temperate	Peatland (fen)	minerotrophic	overall	seasonally	Peat moss	/	0	0	Italy	46.017	11.041	46°01′03″	11°02′27″	1563	5.4	1290	Temperate	/	/	Peatland (fen)	minerotrophic	overall	seasonally	Molinia caerula	Peat moss	2013	Annual	/	Half-hourly to daily	EC		/	/	/	/	/	/		/	/	/	/	/	/	kg ha-1 yr-1
51	Pullens et al. 2016	Pristine	Pristine	Temperate	Peatland (fen)	minerotrophic	overall	seasonally	Peat moss	/	0	0	Italy	46.017	11.041	46°01′03″	11°02′27″	1563	5.4	1290	Temperate	/	/	Peatland (fen)	minerotrophic	overall	seasonally	Molinia caerula	Peat moss	2014	Annual	/	Half-hourly to daily	EC		/	/	/	/	/	/		/	/	/	/	/	/	kg ha-1 yr-1
52	Niu et al. 2017	Pristine	Pristine	Temperate	Marsh	minerotrophic	overall	seasonally	Cyperaceae	/	0	0	China	30.467	91.05	30°28′	91°03′	4286	1.8	475.6	Temperate	/	/	Marsh	minerotrophic	overall	seasonally	K. littledalei	Cyperaceae	2009	Annual	/	Half-hourly to daily	EC		/	/	/	/	/	/		/	/	/	/	/	/	kg ha-1 yr-1
53	Niu et al. 2017	Pristine	Pristine	Temperate	Marsh	minerotrophic	overall	seasonally	Cyperaceae	/	0	0	China	30.467	91.05	30°28′	91°03′	4286	1.8	475.6	Temperate	/	/	Marsh	minerotrophic	overall	seasonally	K. littledalei	Cyperaceae	2010	Annual	/	Half-hourly to daily	EC		/	/	/	/	/	/		/	/	/	/	/	/	kg ha-1 yr-1
54	Niu et al. 2017	Pristine	Pristine	Temperate	Marsh	minerotrophic	overall	seasonally	Cyperaceae	/	0	0	China	30.467	91.05	30°28′	91°03′	4286	1.8	475.6	Temperate	/	/	Marsh	minerotrophic	overall	seasonally	K. littledalei	Cyperaceae	2011	Annual	/	Half-hourly to daily	EC		/	/	/	/	/	/		/	/	/	/	/	/	kg ha-1 yr-1
55	Niu et al. 2017	Pristine	Pristine	Temperate	Marsh	minerotrophic	overall	seasonally	Cyperaceae	/	0	0	China	30.467	91.05	30°28′	91°03′	4286	1.8	475.6	Temperate	/	/	Marsh	minerotrophic	overall	seasonally	K. littledalei	Cyperaceae	2012	Annual	/	Half-hourly to daily	EC		/	/	/	/	/	/		/	/	/	/	/	/	kg ha-1 yr-1
56	Niu et al. 2017	Pristine	Pristine	Temperate	Marsh	minerotrophic	overall	seasonally	Cyperaceae	/	0	0	China	30.467	91.05	30°28′	91°03′	4286	1.8	475.6	Temperate	/	/	Marsh	minerotrophic	overall	seasonally	K. littledalei	Cyperaceae	2013	Annual	/	Half-hourly to daily	EC		/	/	/	/	/	/		/	/	/	/	/	/	kg ha-1 yr-1
57	Mezbahuddin et al. 2017	Pristine	Pristine	Boreal	Peatland (fen)	mesotrophic	overall	seasonally	Forest	2	0	0	Canada	54.95	-112.47	54.95°	112.47° W	/	2.65049	553	Boreal	/	/	Peatland (fen)	mesotrophic	overall	seasonally	Picea mariana and Larix laricina	Forest	2004	Annual	/	Half-hourly to daily	EC		/	/	/	/	/	/		/	/	/	/	/	/	kg ha-1 yr-1
58	Mezbahuddin et al. 2017	Pristine	Pristine	Boreal	Peatland (fen)	mesotrophic	overall	seasonally	Forest	2	0	0	Canada	54.95	-112.47	54.95°	112.47° W	/	2.18447	387	Boreal	/	/	Peatland (fen)	mesotrophic	overall	seasonally	Picea mariana and Larix laricina	Forest	2005	Annual	/	Half-hourly to daily	EC		/	/	/	/	/	/		/	/	/	/	/	/	kg ha-1 yr-1
59	Mezbahuddin et al. 2017	Pristine	Pristine	Boreal	Peatland (fen)	mesotrophic	overall	seasonally	Forest	2	0	0	Canada	54.95	-112.47	54.95°	112.47° W	/	1.66019	465	Boreal	/	/	Peatland (fen)	mesotrophic	overall	seasonally	Picea mariana and Larix laricina	Forest	2006	Annual	/	Half-hourly to daily	EC		/	/	/	/	/	/		/	/	/	/	/	/	kg ha-1 yr-1
60	Mezbahuddin et al. 2017	Pristine	Pristine	Boreal	Peatland (fen)	mesotrophic	overall	seasonally	Forest	2	0	0	Canada	54.95	-112.47	54.95°	112.47° W	/	1.25243	431	Boreal	/	/	Peatland (fen)	mesotrophic	overall	seasonally	Picea mariana and Larix laricina	Forest	2007	Annual	/	Half-hourly to daily	EC		/	/	/	/	/	/		/	/	/	/	/	/	kg ha-1 yr-1
61	Mezbahuddin et al. 2017	Pristine	Pristine	Boreal	Peatland (fen)	mesotrophic	overall	seasonally	Forest	2	0	0	Canada	54.95	-112.47	54.95°	112.47° W	/	0.932039	494	Boreal	/	/	Peatland (fen)	mesotrophic	overall	seasonally	Picea mariana and Larix laricina	Forest	2008	Annual	/	Half-hourly to daily	EC		/	/	/	/	/	/		/	/	/	/	/	/	kg ha-1 yr-1
62	Helbig et al. 2017	Pristine	Pristine	Boreal	Peatland (bog)	ombrotrophic	overall	seasonally	Peat moss	3	0	0	Canada	61.3	-121.3	61°18′	121°18′W	/	-2.8	388	Boreal	/	/	Peatland (bog)	ombrotrophic	overall	seasonally	Sphagnum balticum and Sphagnum magellanicum	Peat moss	2015/08/01-2016/07/31	Annual	/	Half-hourly to daily	EC		/	/	/	/	/	/		/	/	/	/	/	/	kg ha-1 yr-1
63	Helfter et al. 2015	Pristine	Pristine	Temperate	Peatland (bog)	ombrotrophic	overall	seasonally	Peat moss	/	0	0	UK	55.792	-3.243	55°47′32″	3°14′35″W	267	8.3	1018	Temperate	/	/	Peatland (bog)	ombrotrophic	overall	seasonally	Deschampsia flexuosa and Sphagnum papillosum	Peat moss	2002-2013	Annual	/	Half-hourly to daily	EC		/	/	/	/	/	/		/	/	/	/	/	/
64	Christensen et al. 2012	Pristine	Pristine	Boreal	Peatland (bog)	ombrotrophic	overall	seasonally	Cyperaceae	3	0	0	Sweden	68.333	19.05	68°20′	19°03′	363	-0.2	340	Boreal	/	/	Peatland (bog)	ombrotrophic	overall	seasonally	Eriophorum angustifolium	Cyperaceae	2001	Annual	/	Half-hourly to daily	EC		/	/	/	/	/	/		/	/	/	/	/	/
65	Christensen et al. 2012	Pristine	Pristine	Boreal	Peatland (bog)	ombrotrophic	overall	seasonally	Cyperaceae	3	0	0	Sweden	68.333	19.05	68°20′	19°03′	363	-0.2	340	Boreal	/	/	Peatland (bog)	ombrotrophic	overall	seasonally	Eriophorum angustifolium	Cyperaceae	2002	Annual	/	Half-hourly to daily	EC		/	/	/	/	/	/		/	/	/	/	/	/
66	Christensen et al. 2012	Pristine	Pristine	Boreal	Peatland (bog)	ombrotrophic	overall	seasonally	Cyperaceae	3	0	0	Sweden	68.333	19.05	68°20′	19°03′	363	-0.2	340	Boreal	/	/	Peatland (bog)	ombrotrophic	overall	seasonally	Eriophorum angustifolium	Cyperaceae	2003	Annual	/	Half-hourly to daily	EC		/	/	/	/	/	/		/	/	/	/	/	/
67	Christensen et al. 2012	Pristine	Pristine	Boreal	Peatland (bog)	ombrotrophic	overall	seasonally	Cyperaceae	3	0	0	Sweden	68.333	19.05	68°20′	19°03′	363	-0.2	340	Boreal	/	/	Peatland (bog)	ombrotrophic	overall	seasonally	Eriophorum angustifolium	Cyperaceae	2004	Annual	/	Half-hourly to daily	EC		/	/	/	/	/	/		/	/	/	/	/	/
68	Christensen et al. 2012	Pristine	Pristine	Boreal	Peatland (bog)	ombrotrophic	overall	seasonally	Cyperaceae	3	0	0	Sweden	68.333	19.05	68°20′	19°03′	363	-0.2	340	Boreal	/	/	Peatland (bog)	ombrotrophic	overall	seasonally	Eriophorum angustifolium	Cyperaceae	2005	Annual	/	Half-hourly to daily	EC		/	/	/	/	/	/		/	/	/	/	/	/
69	Christensen et al. 2012	Pristine	Pristine	Boreal	Peatland (bog)	ombrotrophic	overall	seasonally	Cyperaceae	3	0	0	Sweden	68.333	19.05	68°20′	19°03′	363	-0.2	340	Boreal	/	/	Peatland (bog)	ombrotrophic	overall	seasonally	Eriophorum angustifolium	Cyperaceae	2006	Annual	/	Half-hourly to daily	EC		/	/	/	/	/	/		/	/	/	/	/	/
70	Christensen et al. 2012	Pristine	Pristine	Boreal	Peatland (bog)	ombrotrophic	overall	seasonally	Cyperaceae	3	0	0	Sweden	68.333	19.05	68°20′	19°03′	363	-0.2	340	Boreal	/	/	Peatland (bog)	ombrotrophic	overall	seasonally	Eriophorum angustifolium	Cyperaceae	2007	Annual	/	Half-hourly to daily	EC		/	/	/	/	/	/		/	/	/	/	/	/
71	Christensen et al. 2012	Pristine	Pristine	Boreal	Peatland (bog)	ombrotrophic	overall	seasonally	Cyperaceae	3	0	0	Sweden	68.333	19.05	68°20′	19°03′	363	-0.2	340	Boreal	/	/	Peatland (bog)	ombrotrophic	overall	seasonally	Eriophorum angustifolium	Cyperaceae	2008	Annual	/	Half-hourly to daily	EC		/	/	/	/	/	/		/	/	/	/	/	/
72	Roulet et al. 2007	Pristine	Pristine	Temperate	Peatland (bog)	ombrotrophic	overall	seasonally	Peat moss	5	0	0	Canada	45.41	-75.48	45.41°	75.48° W	69	6	943	Temperate	/	/	Peatland (bog)	ombrotrophic	overall	seasonally	Sphagnum capillifolium and Sphagnum magellanicum	Peat moss	1998-2004	Annual	/	Half-hourly to daily	EC		/	/	/	/	/	/		/	/	/	/	/	/
73	McVeigh et al. 2014	Pristine	Pristine	Temperate	Peatland (bog)	ombrotrophic	overall	seasonally	Graminoid	3.5	0	0	Ireland	51.917	-9.917	51°55′	9°55′ W	150	10.5	2467	Temperate	/	/	Peatland (bog)	ombrotrophic	overall	seasonally	Molinia caerula	Graminoid	2003-2011	Annual	/	Half-hourly to daily	EC		/	/	/	/	/	/		/	/	/	/	/	/
74	Lund et al. 2012	Pristine	Pristine	Temperate	Peatland (bog)	ombrotrophic	overall	seasonally	Peat moss	5	0	0	Sweden	56.25	13.55	56°15′	13°33′	/	6.2	700	Temperate	/	/	Peatland (bog)	ombrotrophic	overall	seasonally	Sphagnum magellanicum	Peat moss	2006	Annual	/	Half-hourly to daily	EC		/	/	/	/	/	/		/	/	/	/	/	/
75	Lund et al. 2012	Pristine	Pristine	Temperate	Peatland (bog)	ombrotrophic	overall	seasonally	Peat moss	5	0	0	Sweden	56.25	13.55	56°15′	13°33′	/	6.2	700	Temperate	/	/	Peatland (bog)	ombrotrophic	overall	seasonally	Sphagnum magellanicum	Peat moss	2007	Annual	/	Half-hourly to daily	EC		/	/	/	/	/	/		/	/	/	/	/	/
76	Lund et al. 2012	Pristine	Pristine	Temperate	Peatland (bog)	ombrotrophic	overall	seasonally	Peat moss	5	0	0	Sweden	56.25	13.55	56°15′	13°33′	/	6.2	700	Temperate	/	/	Peatland (bog)	ombrotrophic	overall	seasonally	Sphagnum magellanicum	Peat moss	2008	Annual	/	Half-hourly to daily	EC		/	/	/	/	/	/		/	/	/	/	/	/
77	Lund et al. 2012	Pristine	Pristine	Temperate	Peatland (bog)	ombrotrophic	overall	seasonally	Peat moss	5	0	0	Sweden	56.25	13.55	56°15′	13°33′	/	6.2	700	Temperate	/	/	Peatland (bog)	ombrotrophic	overall	seasonally	Sphagnum magellanicum	Peat moss	2009	Annual	/	Half-hourly to daily	EC		/	/	/	/	/	/		/	/	/	/	/	/
78	Syed et al. 2006	Pristine	Pristine	Boreal	Peatland (fen)	mesotrophic	overall	seasonally	Peat moss	2	0	0	Canada	54.95	-112.47	54.95°	112.47° W	/	2.1	504	Boreal	/	/	Peatland (fen)	mesotrophic	overall	seasonally	Sphagnum angustifolium	Peat moss	2003/12-2004/12	Annual	/	Half-hourly to daily	EC		/	/	/	/	/	/		/	/	/	/	/	/	kg ha-1 yr-1
79	Liu et al. 2019	Pristine	Pristine	Temperate	Peatland (fen)	minerotrophic	overall	seasonally	Cyperaceae	4	0	0	China	33.104	102.651	33°06′15.419″	102°39′05.278″	3460	1.5	748	Temperate	/	/	Peatland (fen)	minerotrophic	overall	seasonally	Carex muliensis and Scirpus triqueter	Cyperaceae	2013	Annual	/	Half-hourly to daily	EC		/	/	/	/	/	/		/	/	/	/	/	/	kg ha-1 yr-1
80	Liu et al. 2019	Pristine	Pristine	Temperate	Peatland (fen)	minerotrophic	overall	seasonally	Cyperaceae	4	0	0	China	33.104	102.651	33°06′15.419″	102°39′05.278″	3460	1.5	748	Temperate	/	/	Peatland (fen)	minerotrophic	overall	seasonally	Carex muliensis and Scirpus triqueter	Cyperaceae	2014	Annual	/	Half-hourly to daily	EC		/	/	/	/	/	/		/	/	/	/	/	/	kg ha-1 yr-1
81	Liu et al. 2019	Pristine	Pristine	Temperate	Peatland (fen)	minerotrophic	overall	seasonally	Cyperaceae	4	0	0	China	33.104	102.651	33°06′15.419″	102°39′05.278″	3460	1.5	748	Temperate	/	/	Peatland (fen)	minerotrophic	overall	seasonally	Carex muliensis and Scirpus triqueter	Cyperaceae	2015	Annual	/	Half-hourly to daily	EC		/	/	/	/	/	/		/	/	/	/	/	/	kg ha-1 yr-1
82	Liu et al. 2019	Pristine	Pristine	Temperate	Peatland (fen)	minerotrophic	overall	seasonally	Cyperaceae	4	0	0	China	33.104	102.651	33°06′15.419″	102°39′05.278″	3460	1.5	748	Temperate	/	/	Peatland (fen)	minerotrophic	overall	seasonally	Carex muliensis and Scirpus triqueter	Cyperaceae	2016	Annual	/	Half-hourly to daily	EC		/	/	/	/	/	/		/	/	/	/	/	/	kg ha-1 yr-1
83	Liu et al. 2019	Pristine	Pristine	Temperate	Peatland (fen)	minerotrophic	overall	seasonally	Cyperaceae	4	0	0	China	33.104	102.651	33°06′15.419″	102°39′05.278″	3460	1.5	748	Temperate	/	/	Peatland (fen)	minerotrophic	overall	seasonally	Carex muliensis and Scirpus triqueter	Cyperaceae	2017	Annual	/	Half-hourly to daily	EC		/	/	/	/	/	/		/	/	/	/	/	/	kg ha-1 yr-1
84	Peng et al. 2016	Pristine	Pristine	Temperate	Peatland (fen)	minerotrophic	overall	seasonally	Cyperaceae	/	0	0	China	32.767	102.5	32°46′	102°30′	3510	/	/	Temperate	/	/	Peatland (fen)	minerotrophic	overall	seasonally	Carex muliensi and Kobresia tibetica	Cyperaceae	2014	Annual	/	Half-hourly to daily	EC		/	/	/	/	/	/		/	/	/	/	/	/
85	Hao et al. 2011	Pristine	Pristine	Temperate	Peatland (bog)	ombrotrophic	overall	seasonally	Cyperaceae	0.5-0.8	0	0	China	32.767	102.5	33°56′	102°52′	3430	/	/	Temperate	/	/	Peatland (bog)	ombrotrophic	overall	seasonally	Kobresia tibetica	Cyperaceae	2008	Annual	/	Half-hourly to daily	EC		/	/	/	/	/	/		/	/	/	/	/	/	kg ha-1 yr-1
86	Hao et al. 2011	Pristine	Pristine	Temperate	Peatland (bog)	ombrotrophic	overall	seasonally	Cyperaceae	0.5-0.8	0	0	China	32.767	102.5	33°56′	102°52′	3430	/	/	Temperate	/	/	Peatland (bog)	ombrotrophic	overall	seasonally	Kobresia tibetica	Cyperaceae	2009	Annual	/	Half-hourly to daily	EC		/	/	/	/	/	/		/	/	/	/	/	/	kg ha-1 yr-1
87	Humphreys et al. 2014	Pristine	Pristine	Boreal	Peatland (bog)	ombrotrophic	overall	seasonally	Shrub	2	0	0	Canada	51.55	-81.825	51°33′	81°49.5′W	/	0.2	699.5	Boreal	/	/	Peatland (bog)	ombrotrophic	overall	seasonally	Chamaedaphne calyculata	Shrub	2010/11/01-2011/10/31	Annual	/	Half-hourly to daily	EC		/	/	/	/	/	/		/	/	/	/	/	/	kg ha-1 yr-1
88	Humphreys et al. 2014	Pristine	Pristine	Boreal	Peatland (bog)	ombrotrophic	overall	seasonally	Shrub	2	0	0	Canada	51.55	-81.825	51°33′	81°49.5′W	/	0	699.5	Boreal	/	/	Peatland (bog)	ombrotrophic	overall	seasonally	Chamaedaphne calyculata	Shrub	2011/11/01-2012/10/31	Annual	/	Half-hourly to daily	EC		/	/	/	/	/	/		/	/	/	/	/	/	kg ha-1 yr-1
89	Humphreys et al. 2014	Pristine	Pristine	Boreal	Peatland (bog)	ombrotrophic	overall	seasonally	Graminoid	1.4-2.7	0	0	Canada	51.583	-81.767	51°35′	81°46′W	/	1.4	681.6	Boreal	/	/	Peatland (bog)	ombrotrophic	overall	seasonally	Graminoids	Graminoid	2010/11/01-2011/10/31	Annual	/	Half-hourly to daily	EC		/	/	/	/	/	/		/	/	/	/	/	/	kg ha-1 yr-1
90	Humphreys et al. 2014	Pristine	Pristine	Boreal	Peatland (bog)	ombrotrophic	overall	seasonally	Graminoid	1.4-2.7	0	0	Canada	51.583	-81.767	51°35′	81°46′W	/	1.3	681.6	Boreal	/	/	Peatland (bog)	ombrotrophic	overall	seasonally	Graminoids	Graminoid	2011/11/01-2012/10/31	Annual	/	Half-hourly to daily	EC		/	/	/	/	/	/		/	/	/	/	/	/	kg ha-1 yr-1
91	Humphreys et al. 2014	Pristine	Pristine	Temperate	Peatland (bog)	ombrotrophic	overall	seasonally	Shrub	0.3-5.0	0	0	Canada	45.4	-75.5	45°24′	75°30′W	/	6.6	341.7	Temperate	/	/	Peatland (bog)	ombrotrophic	overall	seasonally	Chamaedaphne calyculata	Shrub	2010/11/01-2011/10/31	Annual	/	Half-hourly to daily	EC		/	/	/	/	/	/		/	/	/	/	/	/	kg ha-1 yr-1
92	Humphreys et al. 2014	Pristine	Pristine	Temperate	Peatland (bog)	ombrotrophic	overall	seasonally	Shrub	0.3-5.0	0	0	Canada	45.4	-75.5	45°24′	75°30′W	/	6.7	341.7	Temperate	/	/	Peatland (bog)	ombrotrophic	overall	seasonally	Chamaedaphne calyculata	Shrub	2011/11/01-2012/10/31	Annual	/	Half-hourly to daily	EC		/	/	/	/	/	/		/	/	/	/	/	/	kg ha-1 yr-1
93	Gažovič et al. 2013	Pristine	Pristine	Boreal	Peatland (fen)	ombrotrophic	overall	seasonally	Peat moss	/	0	0	Finland	62.783	30.933	62°47′	30°56	/	2	591	Boreal	/	/	Peatland (fen)	ombrotrophic	overall	seasonally	Sphagnum fuscum, Sphagnum papillosum, Scheuchzeria palustris	Peat moss	2011/11/01-2012/10/32	Annual	/	Half-hourly to daily	EC		/	/	/	/	/	/		/	/	/	/	/	/	kg ha-1 yr-1
94	Gažovič et al. 2013	Pristine	Pristine	Boreal	Peatland (fen)	ombrotrophic	overall	seasonally	Peat moss	/	0	0	Finland	62.783	30.933	62°47′	30°56	/	2	700	Boreal	/	/	Peatland (fen)	ombrotrophic	overall	seasonally	Sphagnum fuscum, Sphagnum papillosum, Scheuchzeria palustris	Peat moss	2011/11/01-2012/10/32	Annual	/	Half-hourly to daily	EC		/	/	/	/	/	/		/	/	/	/	/	/	kg ha-1 yr-1
95	Drollinger et al. 2019	Pristine	Pristine	Temperate	Peatland (bog)	ombrotrophic	overall	seasonally	Shrub	0.83	0	0	Austria	47.581	14.367	47°34.873′	14°20.810′	632	8.2	1133	Temperate	/	/	Peatland (bog)	ombrotrophic	overall	seasonally	Pinus mugo	Shrub	2015/06/01-2016/05/31	Annual	/	Half-hourly to daily	EC		/	/	/	/	/	/		/	/	/	/	/	/	kg ha-1 yr-1
96	Drollinger et al. 2019	Pristine	Pristine	Temperate	Peatland (bog)	ombrotrophic	overall	seasonally	Shrub	0.83	0	0	Austria	47.581	14.367	47°34.873′	14°20.810′	632	7.4	1459	Temperate	/	/	Peatland (bog)	ombrotrophic	overall	seasonally	Pinus mugo	Shrub	2016/06/01-2017/05/31	Annual	/	Half-hourly to daily	EC		/	/	/	/	/	/		/	/	/	/	/	/	kg ha-1 yr-1
97	Cliche Trudeau et al. 2014	Pristine	Pristine	Boreal	Peatland (fen)	ombrotrophic	overall	seasonally	Cyperaceae	1.08	0	0	Canada	54.115	-72.502	54°06.9′	72°30.1′W	/	-4.28	738	Boreal	/	/	Peatland (fen)	ombrotrophic	overall	seasonally	Carex exilis, Carex Oligosperma	Cyperaceae	2009	Annual	/	weekly	Field, Chamber		/	/	/	/	/	/		/	/	/	/	/	/
98	Cliche Trudeau et al. 2014	Pristine	Pristine	Boreal	Peatland (fen)	ombrotrophic	overall	seasonally	Cyperaceae	1.08	0	0	Canada	54.115	-72.502	54°06.9′	72°30.1′W	/	-4.28	738	Boreal	/	/	Peatland (fen)	ombrotrophic	overall	seasonally	Carex exilis, Carex Oligosperma	Cyperaceae	2010	Annual	/	weekly	Field, Chamber		/	/	/	/	/	/		/	/	/	/	/	/
99	Lafleur et al. 2003	Pristine	Pristine	Temperate	Peatland (bog)	ombrotrophic	overall	seasonally	Peat moss	5.0-6.0	0	0	Canada	45.4	-75.5	45.40°	75.50° W	/	5.8	910	Temperate	/	/	Peatland (bog)	ombrotrophic	overall	seasonally	Sphagnum capillifolium, Sphagnum fuscum, Sphagnum magellanicum	Peat moss	1999	Annual	/	Half-hourly to daily	EC		/	/	/	/	/	/		/	/	/	/	/	/	kg ha-1 yr-1
100	Lafleur et al. 2003	Pristine	Pristine	Temperate	Peatland (bog)	ombrotrophic	overall	seasonally	Peat moss	5.0-6.0	0	0	Canada	45.4	-75.5	45.40°	75.50° W	/	5.8	910	Temperate	/	/	Peatland (bog)	ombrotrophic	overall	seasonally	Sphagnum capillifolium, Sphagnum fuscum, Sphagnum magellanicum	Peat moss	2000	Annual	/	Half-hourly to daily	EC		/	/	/	/	/	/		/	/	/	/	/	/	kg ha-1 yr-1
101	Lafleur et al. 2003	Pristine	Pristine	Temperate	Peatland (bog)	ombrotrophic	overall	seasonally	Peat moss	5.0-6.0	0	0	Canada	45.4	-75.5	45.40°	75.50° W	/	5.8	910	Temperate	/	/	Peatland (bog)	ombrotrophic	overall	seasonally	Sphagnum capillifolium, Sphagnum fuscum, Sphagnum magellanicum	Peat moss	2001	Annual	/	Half-hourly to daily	EC		/	/	/	/	/	/		/	/	/	/	/	/	kg ha-1 yr-1
102	Strachan et al. 2016	Pristine	Pristine	Boreal	Peatland (bog)	ombrotrophic	overall	seasonally	Peat moss	5.3	0	0	Canada	52.29	-75.838	52°17′25″	75°50′15″W	/	-2.3	735	Boreal	/	/	Peatland (bog)	ombrotrophic	overall	seasonally	Sphagnum fuscum, Sphagnum fallax	Peat moss	2007/11/01-2008/10/31	Annual	/	Half-hourly to daily	EC		/	/	/	/	/	/		/	/	/	/	/	/	kg ha-1 yr-1
103	Strachan et al. 2016	Pristine	Pristine	Boreal	Peatland (bog)	ombrotrophic	overall	seasonally	Peat moss	6.3	0	0	Canada	52.29	-75.838	52°17′25″	75°50′15″W	/	-2.3	735	Boreal	/	/	Peatland (bog)	ombrotrophic	overall	seasonally	Sphagnum fuscum, Sphagnum fallax	Peat moss	2008/11/01-2009/10/31	Annual	/	Half-hourly to daily	EC		/	/	/	/	/	/		/	/	/	/	/	/	kg ha-1 yr-1
104	Strachan et al. 2016	Pristine	Pristine	Boreal	Peatland (bog)	ombrotrophic	overall	seasonally	Peat moss	7.3	0	0	Canada	52.29	-75.838	52°17′25″	75°50′15″W	/	-2.3	735	Boreal	/	/	Peatland (bog)	ombrotrophic	overall	seasonally	Sphagnum fuscum, Sphagnum fallax	Peat moss	2009/11/01-2010/10/31	Annual	/	Half-hourly to daily	EC		/	/	/	/	/	/		/	/	/	/	/	/	kg ha-1 yr-1
105	Strachan et al. 2016	Pristine	Pristine	Boreal	Peatland (bog)	ombrotrophic	overall	seasonally	Peat moss	8.3	0	0	Canada	52.29	-75.838	52°17′25″	75°50′15″W	/	-2.3	735	Boreal	/	/	Peatland (bog)	ombrotrophic	overall	seasonally	Sphagnum fuscum, Sphagnum fallax	Peat moss	2010/11/01-2011/10/31	Annual	/	Half-hourly to daily	EC		/	/	/	/	/	/		/	/	/	/	/	/	kg ha-1 yr-1
106	Strachan et al. 2016	Pristine	Pristine	Boreal	Peatland (bog)	ombrotrophic	overall	seasonally	Peat moss	9.3	0	0	Canada	52.29	-75.838	52°17′25″	75°50′15″W	/	-2.3	735	Boreal	/	/	Peatland (bog)	ombrotrophic	overall	seasonally	Sphagnum fuscum, Sphagnum fallax	Peat moss	2011/11/01-2012/10/31	Annual	/	Half-hourly to daily	EC		/	/	/	/	/	/		/	/	/	/	/	/	kg ha-1 yr-1
107	Olson et al. 2013	Pristine	Pristine	Temperate	Peatland (bog)	ombrotrophic	overall	seasonally	Peat moss	3	0	0	USA	47.505	-93.489	47.505	-93.489	/	3.9	470	Temperate	/	/	Peatland (bog)	ombrotrophic	overall	seasonally	Sphagnum papillosum	Peat moss	2009	Annual	/	Half-hourly to daily	EC		/	/	/	/	/	/		/	/	/	/	/	/
108	Olson et al. 2013	Pristine	Pristine	Temperate	Peatland (bog)	ombrotrophic	overall	seasonally	Peat moss	3	0	0	USA	47.505	-93.489	47.505	-93.489	/	3.5	698	Temperate	/	/	Peatland (bog)	ombrotrophic	overall	seasonally	Sphagnum papillosum	Peat moss	2010	Annual	/	Half-hourly to daily	EC		/	/	/	/	/	/		/	/	/	/	/	/
109	Olson et al. 2013	Pristine	Pristine	Temperate	Peatland (bog)	ombrotrophic	overall	seasonally	Peat moss	3	0	0	USA	47.505	-93.489	47.505	-93.489	/	5.9	770	Temperate	/	/	Peatland (bog)	ombrotrophic	overall	seasonally	Sphagnum papillosum	Peat moss	2011	Annual	/	Half-hourly to daily	EC		/	/	/	/	/	/		/	/	/	/	/	/
110	Aslan-Sungur et al. 2016	Drainage	Peat extraction	Temperate	Peatland (fen)	minerotrophic	overall	seasonally	Graminoid	/	0	0	Turkey	40.79	32.029	40°47′24″	32°01′44″	988	8	408.4	Temperate	26	/	Peatland (fen)	minerotrophic	overall	seasonally	Phragmites australis,Typha domingensis	Graminoid	2011	Annual	/	Half-hourly to daily	EC		/	/	/	/	/	/		/	/	/	/	/	/	kg ha-1 yr-1
111	Aslan-Sungur et al. 2016	Drainage	Peat extraction	Temperate	Peatland (fen)	minerotrophic	overall	seasonally	Graminoid	/	0	0	Turkey	40.79	32.029	40°47′24″	32°01′44″	988	8.9	159.8	Temperate	26	/	Peatland (fen)	minerotrophic	overall	seasonally	Phragmites australis,Typha domingensis	Graminoid	2012	Annual	/	Half-hourly to daily	EC		/	/	/	/	/	/		/	/	/	/	/	/	kg ha-1 yr-1
112	Aslan-Sungur et al. 2016	Drainage	Peat extraction	Temperate	Peatland (fen)	minerotrophic	overall	seasonally	Graminoid	/	0	0	Turkey	40.79	32.029	40°47′24″	32°01′44″	988	8.5	262.6	Temperate	26	/	Peatland (fen)	minerotrophic	overall	seasonally	Phragmites australis,Typha domingensis	Graminoid	2013	Annual	/	Half-hourly to daily	EC		/	/	/	/	/	/		/	/	/	/	/	/	kg ha-1 yr-1
113	Fortuniak et al. 2017	Pristine	Pristine	Temperate	Peatland (fen)	minerotrophic	overall	seasonally	Cyperaceae	2.5	0	0	Poland	53.592	22.892	53°35′30.8″	22°53′32.4″	110	6.9	703	Temperate	/	/	Peatland (fen)	minerotrophic	overall	seasonally	Caricetum rostratae	Cyperaceae	2013	Annual	/	Half-hourly to daily	EC		/	/	/	/	/	/		/	/	/	/	/	/
114	Fortuniak et al. 2017	Pristine	Pristine	Temperate	Peatland (fen)	minerotrophic	overall	seasonally	Cyperaceae	2.5	0	0	Poland	53.592	22.892	53°35′30.8″	22°53′32.4″	110	7.3	527	Temperate	/	/	Peatland (fen)	minerotrophic	overall	seasonally	Caricetum rostratae	Cyperaceae	2014	Annual	/	Half-hourly to daily	EC		/	/	/	/	/	/		/	/	/	/	/	/
115	Olefeldt et al. 2012	Pristine	Pristine	Boreal	Peatland (bog)	ombrotrophic	overall	seasonally	Peat moss	/	0	0	Canada	68.367	19.05	68°22′	19°03′	/	-0.2	321	Boreal	/	/	Peatland (bog)	ombrotrophic	overall	seasonally	Sphagnum fuscum and Dicranum elongatum	Peat moss	2008	Annual	/	Half-hourly to daily	EC		/	/	/	/	/	/		/	/	/	/	/	/
116	Olefeldt et al. 2012	Pristine	Pristine	Boreal	Peatland (bog)	ombrotrophic	overall	seasonally	Peat moss	/	0	0	Canada	68.367	19.05	68°22′	19°03′	/	-0.4	281	Boreal	/	/	Peatland (bog)	ombrotrophic	overall	seasonally	Sphagnum fuscum and Dicranum elongatum	Peat moss	2009	Annual	/	Half-hourly to daily	EC		/	/	/	/	/	/		/	/	/	/	/	/
117	Minkkinen et al. 2018	Drainage	Forestry	Boreal	Peatland (bog)	ombrotrophic	overall	seasonally	Peat moss	/	0	0	Finland	60.647	24.356	60°38′49″	24°21′23″	123	4.7	725	Boreal	44	/	Peatland (bog)	ombrotrophic	overall	seasonally	Sphagnum fuscum, Sphagnum magellanicum	Peat moss	2005	Annual	/	Half-hourly to daily	EC		/	/	/	/	/	/		/	/	/	/	/	/	kg ha-1 yr-1
118	Minkkinen et al. 2018	Drainage	Forestry	Boreal	Peatland (bog)	ombrotrophic	overall	seasonally	Peat moss	/	0	0	Finland	60.647	24.356	60°38′49″	24°21′23″	123	5.1	600	Boreal	45	/	Peatland (bog)	ombrotrophic	overall	seasonally	Sphagnum fuscum, Sphagnum magellanicum	Peat moss	2006	Annual	/	Half-hourly to daily	EC		/	/	/	/	/	/		/	/	/	/	/	/	kg ha-1 yr-1
119	Minkkinen et al. 2018	Drainage	Forestry	Boreal	Peatland (bog)	ombrotrophic	overall	seasonally	Peat moss	/	0	0	Finland	60.647	24.356	60°38′49″	24°21′23″	123	4.9	724	Boreal	46	/	Peatland (bog)	ombrotrophic	overall	seasonally	Sphagnum fuscum, Sphagnum magellanicum	Peat moss	2007	Annual	/	Half-hourly to daily	EC		/	/	/	/	/	/		/	/	/	/	/	/	kg ha-1 yr-1
120	Minkkinen et al. 2018	Drainage	Forestry	Boreal	Peatland (bog)	ombrotrophic	overall	seasonally	Peat moss	/	0	0	Finland	60.647	24.356	60°38′49″	24°21′23″	123	5.6	839	Boreal	47	/	Peatland (bog)	ombrotrophic	overall	seasonally	Sphagnum fuscum, Sphagnum magellanicum	Peat moss	2008	Annual	/	Half-hourly to daily	EC		/	/	/	/	/	/		/	/	/	/	/	/	kg ha-1 yr-1
121	Roehm and Roulet, 2003	Pristine	Pristine	Temperate	Peatland (bog)	ombrotrophic	overall	seasonally	Peat moss	2.5	0	0	Canada	45.7	-73.917	45°42′	73°55′W	/	6.1	940	Temperate	/	/	Peatland (bog)	ombrotrophic	overall	seasonally	Sphagnum fuscum, Sphagnum magellanicum	Peat moss	1997	Annual	/	weekly	Field, Chamber		/	/	/	/	/	/		/	/	/	/	/	/	kg ha-1 yr-1
122	Zhao et al. 2010	Drainage	Grassland	Temperate	Marsh	minerotrophic	overall	seasonally	Cyperaceae	0.55	0	0	China	37.583	101.333	37°35′	101°20′	3250	-1.5	493.5	Temperate	/	/	Marsh	minerotrophic	overall	seasonally	K. tibetica, Carex pamirensis, Hippuris vulgaris, Blysmus sinocompressus	Cyperaceae	2003/10-2004/10	Annual	/	Half-hourly to daily	EC		/	/	/	/	/	/		/	/	/	/	/	/	kg ha-1 yr-1
123	Zhao et al. 2010	Drainage	Grassland	Temperate	Marsh	minerotrophic	overall	seasonally	Cyperaceae	0.55	0	0	China	37.583	101.333	37°35′	101°20′	3250	-1	475.2	Temperate	/	/	Marsh	minerotrophic	overall	seasonally	K. tibetica, Carex pamirensis, Hippuris vulgaris, Blysmus sinocompressus	Cyperaceae	2004/10-2005/10	Annual	/	Half-hourly to daily	EC		/	/	/	/	/	/		/	/	/	/	/	/	kg ha-1 yr-1
124	Zhao et al. 2010	Drainage	Grassland	Temperate	Marsh	minerotrophic	overall	seasonally	Cyperaceae	0.55	0	0	China	37.583	101.333	37°35′	101°20′	3250	-0.8	562.4	Temperate	/	/	Marsh	minerotrophic	overall	seasonally	K. tibetica, Carex pamirensis, Hippuris vulgaris, Blysmus sinocompressus	Cyperaceae	2005/10-2006/10	Annual	/	Half-hourly to daily	EC		/	/	/	/	/	/		/	/	/	/	/	/	kg ha-1 yr-1
125	Rinne et al. 2018	Pristine	Pristine	Boreal	Peatland (fen)	minerotrophic	overall	seasonally	Peat moss	6	0	0	China	61.813	24.2	61°50′	24°12′	162	4.4	703	Boreal	/	/	Peatland (fen)	minerotrophic	overall	seasonally	Sphagnum balticum, Sphagnum majus, Sphagnum papillosum	Peat moss	2005	Annual	/	Half-hourly to daily	EC		/	/	/	/	/	/		/	/	/	/	/	/	kg ha-1 yr-1
126	Rinne et al. 2018	Pristine	Pristine	Boreal	Peatland (fen)	minerotrophic	overall	seasonally	Peat moss	6	0	0	China	61.813	24.2	61°50′	24°12′	162	4.6	653	Boreal	/	/	Peatland (fen)	minerotrophic	overall	seasonally	Sphagnum balticum, Sphagnum majus, Sphagnum papillosum	Peat moss	2006	Annual	/	Half-hourly to daily	EC		/	/	/	/	/	/		/	/	/	/	/	/	kg ha-1 yr-1
127	Rinne et al. 2018	Pristine	Pristine	Boreal	Peatland (fen)	minerotrophic	overall	seasonally	Peat moss	6	0	0	China	61.813	24.2	61°50′	24°12′	162	4.5	700	Boreal	/	/	Peatland (fen)	minerotrophic	overall	seasonally	Sphagnum balticum, Sphagnum majus, Sphagnum papillosum	Peat moss	2007	Annual	/	Half-hourly to daily	EC		/	/	/	/	/	/		/	/	/	/	/	/	kg ha-1 yr-1
128	Rinne et al. 2018	Pristine	Pristine	Boreal	Peatland (fen)	minerotrophic	overall	seasonally	Peat moss	6	0	0	China	61.813	24.2	61°50′	24°12′	162	4.9	933	Boreal	/	/	Peatland (fen)	minerotrophic	overall	seasonally	Sphagnum balticum, Sphagnum majus, Sphagnum papillosum	Peat moss	2008	Annual	/	Half-hourly to daily	EC		/	/	/	/	/	/		/	/	/	/	/	/	kg ha-1 yr-1
129	Rinne et al. 2018	Pristine	Pristine	Boreal	Peatland (fen)	minerotrophic	overall	seasonally	Peat moss	6	0	0	China	61.813	24.2	61°50′	24°12′	162	3.8	502	Boreal	/	/	Peatland (fen)	minerotrophic	overall	seasonally	Sphagnum balticum, Sphagnum majus, Sphagnum papillosum	Peat moss	2009	Annual	/	Half-hourly to daily	EC		/	/	/	/	/	/		/	/	/	/	/	/	kg ha-1 yr-1
130	Rinne et al. 2018	Pristine	Pristine	Boreal	Peatland (fen)	minerotrophic	overall	seasonally	Peat moss	6	0	0	China	61.813	24.2	61°50′	24°12′	162	2.5	657	Boreal	/	/	Peatland (fen)	minerotrophic	overall	seasonally	Sphagnum balticum, Sphagnum majus, Sphagnum papillosum	Peat moss	2010	Annual	/	Half-hourly to daily	EC		/	/	/	/	/	/		/	/	/	/	/	/	kg ha-1 yr-1
131	Rinne et al. 2018	Pristine	Pristine	Boreal	Peatland (fen)	minerotrophic	overall	seasonally	Peat moss	6	0	0	China	61.813	24.2	61°50′	24°12′	162	4.9	745	Boreal	/	/	Peatland (fen)	minerotrophic	overall	seasonally	Sphagnum balticum, Sphagnum majus, Sphagnum papillosum	Peat moss	2011	Annual	/	Half-hourly to daily	EC		/	/	/	/	/	/		/	/	/	/	/	/	kg ha-1 yr-1
132	Rinne et al. 2018	Pristine	Pristine	Boreal	Peatland (fen)	minerotrophic	overall	seasonally	Peat moss	6	0	0	China	61.813	24.2	61°50′	24°12′	162	3.2	907	Boreal	/	/	Peatland (fen)	minerotrophic	overall	seasonally	Sphagnum balticum, Sphagnum majus, Sphagnum papillosum	Peat moss	2012	Annual	/	Half-hourly to daily	EC		/	/	/	/	/	/		/	/	/	/	/	/	kg ha-1 yr-1
133	Rinne et al. 2018	Pristine	Pristine	Boreal	Peatland (fen)	minerotrophic	overall	seasonally	Peat moss	6	0	0	China	61.813	24.2	61°50′	24°12′	162	4.9	615	Boreal	/	/	Peatland (fen)	minerotrophic	overall	seasonally	Sphagnum balticum, Sphagnum majus, Sphagnum papillosum	Peat moss	2013	Annual	/	Half-hourly to daily	EC		/	/	/	/	/	/		/	/	/	/	/	/	kg ha-1 yr-1
134	Rinne et al. 2018	Pristine	Pristine	Boreal	Peatland (fen)	minerotrophic	overall	seasonally	Peat moss	6	0	0	China	61.813	24.2	61°50′	24°12′	162	5.1	579	Boreal	/	/	Peatland (fen)	minerotrophic	overall	seasonally	Sphagnum balticum, Sphagnum majus, Sphagnum papillosum	Peat moss	2014	Annual	/	Half-hourly to daily	EC		/	/	/	/	/	/		/	/	/	/	/	/	kg ha-1 yr-1
135	Rinne et al. 2018	Pristine	Pristine	Boreal	Peatland (fen)	minerotrophic	overall	seasonally	Peat moss	6	0	0	China	61.813	24.2	61°50′	24°12′	162	5.5	658	Boreal	/	/	Peatland (fen)	minerotrophic	overall	seasonally	Sphagnum balticum, Sphagnum majus, Sphagnum papillosum	Peat moss	2015	Annual	/	Half-hourly to daily	EC		/	/	/	/	/	/		/	/	/	/	/	/	kg ha-1 yr-1
136	Ratcliffe et al. 2019	Drainage	Cropland	Temperate	Peatland (bog)	ombrotrophic	overall	seasonally	Forest	/	0	0	New Zealand	-37.388	175.554	-37.388	175.554	/	14.7	1269	Temperate	85	/	Peatland (bog)	ombrotrophic	overall	seasonally	Empodisma robustum	Forest	2015/05/01-2016/04/30	Annual	/	Half-hourly to daily	EC		/	/	/	/	/	/		/	/	/	/	/	/	kg ha-1 yr-1
137	Ratcliffe et al. 2019	Drainage	Cropland	Temperate	Peatland (bog)	ombrotrophic	overall	seasonally	Forest	/	0	0	New Zealand	-37.388	175.554	-37.388	175.554	/	14.7	1269	Temperate	86	/	Peatland (bog)	ombrotrophic	overall	seasonally	Empodisma robustum	Forest	2016/05/01-2017/04/30	Annual	/	Half-hourly to daily	EC		/	/	/	/	/	/		/	/	/	/	/	/	kg ha-1 yr-1
138	Jammet et al. 2017	Pristine	Pristine	Boreal	Peatland (fen)	minerotrophic	overall	seasonally	Cyperaceae	/	0	0	Sweden	68.333	19.05	68.333	19.05	/	-0.3	/	Boreal	/	/	Peatland (fen)	minerotrophic	overall	seasonally	Carex rostrata and Eriophorium angustifolium	Cyperaceae	2012–2013	Annual	/	Half-hourly to daily	EC		/	/	/	/	/	/		/	/	/	/	/	/
139	Jammet et al. 2017	Pristine	Pristine	Boreal	Peatland (fen)	minerotrophic	overall	seasonally	Cyperaceae	/	0	0	Sweden	68.333	19.05	68.333	19.05	/	0.9	/	Boreal	/	/	Peatland (fen)	minerotrophic	overall	seasonally	Carex rostrata and Eriophorium angustifolium	Cyperaceae	2013-2014	Annual	/	Half-hourly to daily	EC		/	/	/	/	/	/		/	/	/	/	/	/
[truncated: 84 more columns]

## Sheet: Wet season flux for tropical
ID	References	Treatment	Purpose	Climatic conditions	Wetland type	Nutrient supply type	Microtopography	Permanently/seasonally flooded	Function group	Peat depth (m) in pristine wetland	N rate (kg N ha-1) in drained wetland	Biomass/manure application (t ha-1) in drained wetland	Country	Latitude (°, N)	Longitude (°, E)	Latitude (°, N)	Longitude (°, E)	Altitude (m)	MAT ( °C)	MAP (mm)	Climatic conditions	Drainage duration (years)	Drainage intensity	Wetland type	Nutrient supply type	Microtopography	Permanently/seasonally flooded	Dominant plant species in prestine wetland	Function group	Measurement period	Season	Dry/wet	Measurement frequency	Method	Soil CO2 emission	Control	SD	n	Treatment	SD	n	NPP	Control	SD	n	Treatment	SD	n	Annual GPP
1	Hirano et al. 2007	Drainage	Cropland	Tropical	Swamp	minerotrophic	overall	seasonally	Forest	4	0	0	Indonesia	-2.345	114.036	2°20′42″S	114°2′11″	/	26.7	1852	Tropical	12	/	Swamp	minerotrophic	overall	seasonally	Combretocarpus rotundatus, Cratoxylum arborescens, Buchanania sessifolia and Tetramerista glabra	Forest	2002	Annual	/	Half-hourly to daily	EC		/	/	/	/	/	/		/	/	/	/	/	/	kg ha-1 yr-1
2	Hirano et al. 2007	Drainage	Cropland	Tropical	Swamp	minerotrophic	overall	seasonally	Forest	4	0	0	Indonesia	-2.345	114.036	2°20′42″S	114°2′11″	/	26.4	2292	Tropical	13	/	Swamp	minerotrophic	overall	seasonally	Combretocarpus rotundatus, Cratoxylum arborescens, Buchanania sessifolia and Tetramerista glabra	Forest	2003	Annual	/	Half-hourly to daily	EC		/	/	/	/	/	/		/	/	/	/	/	/	kg ha-1 yr-1
3	Hirano et al. 2007	Drainage	Cropland	Tropical	Swamp	minerotrophic	overall	seasonally	Forest	4	0	0	Indonesia	-2.345	114.036	2°20′42″S	114°2′11″	/	25.9	2560	Tropical	14	/	Swamp	minerotrophic	overall	seasonally	Combretocarpus rotundatus, Cratoxylum arborescens, Buchanania sessifolia and Tetramerista glabra	Forest	2004	Annual	/	Half-hourly to daily	EC		/	/	/	/	/	/		/	/	/	/	/	/	kg ha-1 yr-1
4	Beringer et al. 2013	Prinstine	Pristine	Tropical	Marsh	/	overall	seasonally	Cyperaceae	/	0	0	Australia	-12.567	131.283	12°34′S	131°17′	/	26.7	1446	Tropical	/	/	Marsh	/	overall	seasonally	Reed beds	Cyperaceae	2006	Annual	/	Half-hourly to daily	EC		/	/	/	/	/	/		/	/	/	/	/	/
5	Beringer et al. 2013	Prinstine	Pristine	Tropical	Marsh	/	overall	seasonally	Cyperaceae	/	0	0	Australia	-12.567	131.283	12°34′S	131°17′	/	26.7	1446	Tropical	/	/	Marsh	/	overall	seasonally	Reed beds	Cyperaceae	2007	Annual	/	Half-hourly to daily	EC		/	/	/	/	/	/		/	/	/	/	/	/
6	Beringer et al. 2013	Prinstine	Pristine	Tropical	Marsh	/	overall	seasonally	Cyperaceae	/	0	0	Australia	-12.567	131.283	12°34′S	131°17′	/	26.7	1446	Tropical	/	/	Marsh	/	overall	seasonally	Reed beds	Cyperaceae	2008	Annual	/	Half-hourly to daily	EC		/	/	/	/	/	/		/	/	/	/	/	/
7	Goodrich et al. 2017	Prinstine	Pristine	Tropical	Peatland (bog)	ombrotrophic	overall	seasonally	Forb	14	0	0	New Zealand	37.387	177.554	37.387° S	177.554°	/	13.3	1153	Tropical	/	/	Peatland (bog)	ombrotrophic	overall	seasonally	Empodisma robustum	Forb	2012	Annual	/	Half-hourly to daily	EC		/	/	/	/	/	/		/	/	/	/	/	/	kg ha-1 yr-1
8	Goodrich et al. 2017	Prinstine	Pristine	Tropical	Peatland (bog)	ombrotrophic	overall	seasonally	Forb	14	0	0	New Zealand	37.387	177.554	37.387° S	177.554°	/	14	1105	Tropical	/	/	Peatland (bog)	ombrotrophic	overall	seasonally	Empodisma robustum	Forb	2013	Annual	/	Half-hourly to daily	EC		/	/	/	/	/	/		/	/	/	/	/	/	kg ha-1 yr-1
9	Goodrich et al. 2017	Prinstine	Pristine	Tropical	Peatland (bog)	ombrotrophic	overall	seasonally	Forb	14	0	0	New Zealand	37.387	177.554	37.387° S	177.554°	/	13.9	1086	Tropical	/	/	Peatland (bog)	ombrotrophic	overall	seasonally	Empodisma robustum	Forb	2014	Annual	/	Half-hourly to daily	EC		/	/	/	/	/	/		/	/	/	/	/	/	kg ha-1 yr-1
10	Goodrich et al. 2017	Prinstine	Pristine	Tropical	Peatland (bog)	ombrotrophic	overall	seasonally	Forb	14	0	0	New Zealand	37.387	177.554	37.387° S	177.554°	/	13.6	1167	Tropical	/	/	Peatland (bog)	ombrotrophic	overall	seasonally	Empodisma robustum	Forb	2015	Annual	/	Half-hourly to daily	EC		/	/	/	/	/	/		/	/	/	/	/	/	kg ha-1 yr-1
11	Liu and Lai, 2019	Prinstine	Pristine	Subtropical	Swamp	/	overall	permanently	Forest	/	0	0	China	22.498	114.029	22°29'53.3"	114°01'45.5"	/	24.6283	1749	Subtropical	/	/	Swamp	/	overall	permanently	Kandelia obovata	Forest	2016/02-2017/02	Annual	/	Half-hourly to daily	EC		/	/	/	/	/	/		/	/	/	/	/	/	kg ha-1 yr-1
12	Liu and Lai, 2019	Prinstine	Pristine	Subtropical	Swamp	/	overall	permanently	Forest	/	0	0	China	22.498	114.029	22°29'53.3"	114°01'45.5"	/	24.2608	1735	Subtropical	/	/	Swamp	/	overall	permanently	Kandelia obovata	Forest	2017/02-2018/02	Annual	/	Half-hourly to daily	EC		/	/	/	/	/	/		/	/	/	/	/	/	kg ha-1 yr-1
[truncated: 63 more columns]

## Sheet: Classess
NEE	Purposes	Climate	Wetland type	Nutrirnt type	Microtopography	Permanently/seasonally flooded	Function group	Mean ratio of GS or wet season NEE to annual flux	95% CI	Number of data-points	Lower 95% CI	Upper 95% CI
Pristine	Pristine	Temperate	Peatland (fen)	ombrotrophic	overall	seasonally	Graminoid	1.33043	0.46354	23	0.866894	1.79397
Drainage	Forestry	Temperate	Peatland (fen)	ombrotrophic	overall	seasonally	Graminoid	1.40809	0.215233	5	1.19286	1.62332
Pristine	Pristine	Temperate	Peatland (bog)	ombrotrophic	lawn	seasonally	Cyperaceae	2.28045	0.328358	2	1.95209	2.60881
Drainage	Forestry	Temperate	Peatland (bog)	ombrotrophic	lawn	seasonally	Cyperaceae	1.40809	0.215233	5	1.19286	1.62332
Pristine	Pristine	Temperate	Peatland (bog)	ombrotrophic	hummock	seasonally	Shrub	1.57922	0.302122	4	1.27709	1.88134
Drainage	Forestry	Temperate	Peatland (bog)	ombrotrophic	hummock	seasonally	Shrub	1.40809	0.215233	5	1.19286	1.62332
Pristine	Pristine	Temperate	Peatland (bog)	ombrotrophic	overall	seasonally	Cyperaceae	2.28045	0.328358	2	1.95209	2.60881
Drainage	Forestry	Temperate	Peatland (bog)	ombrotrophic	overall	seasonally	Cyperaceae	1.40809	0.215233	5	1.19286	1.62332
Pristine	Pristine	Temperate	Peatland (fen)	ombrotrophic	overall	seasonally	Peat moss	0.827202	0.658038	9	0.169164	1.48524
Drainage	Forestry	Temperate	Peatland (fen)	ombrotrophic	overall	seasonally	Peat moss	1.40809	0.215233	5	1.19286	1.62332
Pristine	Pristine	Temperate	Peatland (fen)	minerotrophic	overall	seasonally	Peat moss	0.827202	0.658038	9	0.169164	1.48524
Drainage	Climate drying	Temperate	Peatland (fen)	minerotrophic	overall	seasonally	Peat moss	-3.46087	14.2983	4	-17.7591	10.8374
Pristine	Pristine	Temperate	Peatland (bog)	ombrotrophic	overall	seasonally	Peat moss	1.19908	0.678073	15	0.521004	1.87715
Drainage	Climate drying	Temperate	Peatland (bog)	ombrotrophic	overall	seasonally	Peat moss	1.58723	0.25776	11	1.32947	1.84499
Pristine	Pristine	Boreal	Peatland (bog)	ombrotrophic	hummock	seasonally	Shrub	0.803983	1.12385	3	-0.319866	1.92783
Drainage	Forestry	Boreal	Peatland (bog)	ombrotrophic	hummock	seasonally	Shrub	1.40809	0.215233	5	1.19286	1.62332
Pristine	Pristine	Boreal	Peatland (bog)	ombrotrophic	hollow	seasonally	Peat moss	1.54987	0.51167	10	1.0382	2.06154
Drainage	Forestry	Boreal	Peatland (bog)	ombrotrophic	hollow	seasonally	Peat moss	1.40809	0.215233	5	1.19286	1.62332
Pristine	Pristine	Boreal	Peatland (bog)	ombrotrophic	overall	seasonally	Shrub	1.37264	0.249623	2	1.12302	1.62226
Drainage	Forestry	Boreal	Peatland (bog)	ombrotrophic	overall	seasonally	Shrub	1.40809	0.215233	5	1.19286	1.62332
Pristine	Pristine	Boreal	Peatland (fen)	mesotrophic	overall	seasonally	Cyperaceae	2.53925	0.301499	9	2.23775	2.84075
Drainage	Forestry	Boreal	Peatland (fen)	mesotrophic	overall	seasonally	Cyperaceae	1.40809	0.215233	5	1.19286	1.62332
Pristine	Pristine	Boreal	Swamp	minerotrophic	overall	seasonally	Shrub	3.63316	3.85797	8	-0.224812	7.49113
Drainage	Forestry	Boreal	Swamp	minerotrophic	overall	seasonally	Shrub	1.40809	0.215233	5	1.19286	1.62332
Pristine	Pristine	Boreal	Peatland (fen)	minerotrophic	overall	seasonally	Cyperaceae	2.53925	0.301499	9	2.23775	2.84075
Drainage	Climate drying	Boreal	Peatland (fen)	minerotrophic	overall	seasonally	Cyperaceae	-3.46087	14.2983	4	-17.7591	10.8374
Pristine	Pristine	Boreal	Peatland (fen)	minerotrophic	overall	seasonally	Peat moss	1.21814	0.128371	5	1.08976	1.34651
Drainage	Climate drying	Boreal	Peatland (fen)	minerotrophic	overall	seasonally	Peat moss	-3.46087	14.2983	4	-17.7591	10.8374
Pristine	Pristine	Boreal	Peatland (bog)	ombrotrophic	overall	seasonally	Peat moss	1.54987	0.51167	10	1.0382	2.06154
Drainage	Climate drying	Boreal	Peatland (bog)	ombrotrophic	overall	seasonally	Peat moss	1.58723	0.25776	11	1.32947	1.84499
Pristine	Pristine	Boreal	Peatland (fen)	ombrotrophic	hummock	seasonally	Peat moss	1.45396	0.384235	2	1.06973	1.8382
Drainage	Climate drying	Boreal	Peatland (fen)	ombrotrophic	hummock	seasonally	Peat moss	1.58723	0.25776	11	1.32947	1.84499
Pristine	Pristine	Boreal	Peatland (fen)	ombrotrophic	lawn	seasonally	Peat moss	1.45396	0.384235	2	1.06973	1.8382
Drainage	Climate drying	Boreal	Peatland (fen)	ombrotrophic	lawn	seasonally	Peat moss	1.58723	0.25776	11	1.32947	1.84499
Pristine	Pristine	Boreal	Peatland (fen)	ombrotrophic	hollow	seasonally	Cyperaceae	0.538621	0.17658	2	0.362041	0.715201
Drainage	Climate drying	Boreal	Peatland (fen)	ombrotrophic	hollow	seasonally	Cyperaceae	1.58723	0.25776	11	1.32947	1.84499
Pristine	Pristine	Boreal	Peatland (fen)	minerotrophic	overall	permanently	Cyperaceae	2.53925	0.301499	9	2.23775	2.84075
Drainage	Climate drying	Boreal	Peatland (fen)	minerotrophic	overall	permanently	Cyperaceae	-3.46087	14.2983	4	-17.7591	10.8374
Pristine	Pristine	Boreal	Peatland (fen)	minerotrophic	overall	permanently	shrub	3.63316	3.85797	8	-0.224812	7.49113
Drainage	Climate drying	Boreal	Peatland (fen)	minerotrophic	overall	permanently	shrub	-3.46087	14.2983	4	-17.7591	10.8374
Pristine	Pristine	Boreal	Peatland (fen)	minerotrophic	overall	seasonally	Peat moss	1.37672	0.26858	3	1.10814	1.6453
Drainage	Climate drying	Boreal	Peatland (fen)	minerotrophic	overall	seasonally	Peat moss	-3.46087	14.2983	4	-17.7591	10.8374
Re											GPP
Pristine	Pristine	Temperate	Peatland (fen)	ombrotrophic	overall	seasonally	Graminoid	0.760764	0.0946229	9	Pristine	Pristine	Temperate	Peatland (fen)	ombrotrophic	overall	seasonally	Graminoid	0.895876	0.118385	9
Drainage	Forestry	Temperate	Peatland (fen)	ombrotrophic	overall	seasonally	Graminoid	0.79782	0.0616061	5	Drainage	Forestry	Temperate	Peatland (fen)	ombrotrophic	overall	seasonally	Graminoid	0.928136	0.0445981	5
Pristine	Pristine	Temperate	Peatland (bog)	ombrotrophic	lawn	seasonally	Cyperaceae	0.760764	0.0946229	9	Pristine	Pristine	Temperate	Peatland (bog)	ombrotrophic	lawn	seasonally	Cyperaceae	0.895876	0.118385	9
Drainage	Forestry	Temperate	Peatland (bog)	ombrotrophic	lawn	seasonally	Cyperaceae	0.79782	0.0616061	5	Drainage	Forestry	Temperate	Peatland (bog)	ombrotrophic	lawn	seasonally	Cyperaceae	0.928136	0.0445981	5
Pristine	Pristine	Temperate	Peatland (bog)	ombrotrophic	hummock	seasonally	Shrub	0.760764	0.0946229	9	Pristine	Pristine	Temperate	Peatland (bog)	ombrotrophic	hummock	seasonally	Shrub	0.895876	0.118385	9
Drainage	Forestry	Temperate	Peatland (bog)	ombrotrophic	hummock	seasonally	Shrub	0.79782	0.0616061	5	Drainage	Forestry	Temperate	Peatland (bog)	ombrotrophic	hummock	seasonally	Shrub	0.928136	0.0445981	5
Pristine	Pristine	Temperate	Peatland (bog)	ombrotrophic	overall	seasonally	Cyperaceae	0.760764	0.0946229	9	Pristine	Pristine	Temperate	Peatland (bog)	ombrotrophic	overall	seasonally	Cyperaceae	0.895876	0.118385	9
Drainage	Forestry	Temperate	Peatland (bog)	ombrotrophic	overall	seasonally	Cyperaceae	0.79782	0.0616061	5	Drainage	Forestry	Temperate	Peatland (bog)	ombrotrophic	overall	seasonally	Cyperaceae	0.928136	0.0445981	5
Pristine	Pristine	Temperate	Peatland (fen)	ombrotrophic	overall	seasonally	Peat moss	0.760764	0.0946229	9	Pristine	Pristine	Temperate	Peatland (fen)	ombrotrophic	overall	seasonally	Peat moss	0.895876	0.118385	9
Drainage	Forestry	Temperate	Peatland (fen)	ombrotrophic	overall	seasonally	Peat moss	0.79782	0.0616061	5	Drainage	Forestry	Temperate	Peatland (fen)	ombrotrophic	overall	seasonally	Peat moss	0.928136	0.0445981	5
Pristine	Pristine	Temperate	Peatland (fen)	minerotrophic	overall	seasonally	Peat moss	0.891891	0.0969099	8	Pristine	Pristine	Temperate	Peatland (fen)	minerotrophic	overall	seasonally	Peat moss	0.972755	0.0400257	8
Drainage	Climate drying	Temperate	Peatland (fen)	minerotrophic	overall	seasonally	Peat moss	0.862876	0.0360744	12	Drainage	Hydrology simulation	Temperate	Peatland (fen)	minerotrophic	overall	seasonally	Peat moss	0.965933	0.0230684	12
Pristine	Pristine	Temperate	Peatland (bog)	ombrotrophic	overall	seasonally	Peat moss	0.770923	0.067041	5	Pristine	Pristine	Temperate	Peatland (bog)	ombrotrophic	overall	seasonally	Peat moss	0.927571	0.0673625	5
Drainage	Climate drying	Temperate	Peatland (bog)	ombrotrophic	overall	seasonally	Peat moss	0.859924	0.0362831	11	Drainage	Hydrology simulation	Temperate	Peatland (bog)	ombrotrophic	overall	seasonally	Peat moss	0.964027	0.0231821	11
Pristine	Pristine	Boreal	Peatland (bog)	ombrotrophic	hummock	seasonally	Shrub	0.651478	0.032978	2	Pristine	Pristine	Boreal	Peatland (bog)	ombrotrophic	hummock	seasonally	Shrub	0.764121	0.0166861	2
Drainage	Forestry	Boreal	Peatland (bog)	ombrotrophic	hummock	seasonally	Shrub	0.79782	0.0616061	5	Drainage	Forestry	Boreal	Peatland (bog)	ombrotrophic	hummock	seasonally	Shrub	0.928136	0.0445981	5
Pristine	Pristine	Boreal	Peatland (bog)	ombrotrophic	hollow	seasonally	Peat moss	0.740133	0.104565	8	Pristine	Pristine	Boreal	Peatland (bog)	ombrotrophic	hollow	seasonally	Peat moss	0.900587	0.0538819	8
Drainage	Forestry	Boreal	Peatland (bog)	ombrotrophic	hollow	seasonally	Peat moss	0.79782	0.0616061	5	Drainage	Forestry	Boreal	Peatland (bog)	ombrotrophic	hollow	seasonally	Peat moss	0.928136	0.0445981	5
Pristine	Pristine	Boreal	Peatland (bog)	ombrotrophic	overall	seasonally	Shrub	0.651478	0.032978	2	Pristine	Pristine	Boreal	Peatland (bog)	ombrotrophic	overall	seasonally	Shrub	0.764121	0.0166861	2
Drainage	Forestry	Boreal	Peatland (bog)	ombrotrophic	overall	seasonally	Shrub	0.79782	0.0616061	5	Drainage	Forestry	Boreal	Peatland (bog)	ombrotrophic	overall	seasonally	Shrub	0.928136	0.0445981	5
Pristine	Pristine	Boreal	Peatland (bog)	ombrotrophic	hummock	seasonally	Shrub	0.651478	0.032978	2	Pristine	Pristine	Boreal	Peatland (bog)	ombrotrophic	hummock	seasonally	Shrub	0.764121	0.0166861	2
Drainage	Forestry	Boreal	Peatland (bog)	ombrotrophic	hummock	seasonally	Shrub	0.79782	0.0616061	5	Drainage	Forestry	Boreal	Peatland (bog)	ombrotrophic	hummock	seasonally	Shrub	0.928136	0.0445981	5
Pristine	Pristine	Boreal	Peatland (bog)	ombrotrophic	hollow	seasonally	Peat moss	0.740133	0.104565	8	Pristine	Pristine	Boreal	Peatland (bog)	ombrotrophic	hollow	seasonally	Peat moss	0.900587	0.0538819	8
Drainage	Forestry	Boreal	Peatland (bog)	ombrotrophic	hollow	seasonally	Peat moss	0.79782	0.0616061	5	Drainage	Forestry	Boreal	Peatland (bog)	ombrotrophic	hollow	seasonally	Peat moss	0.928136	0.0445981	5
Pristine	Pristine	Boreal	Peatland (bog)	ombrotrophic	overall	seasonally	Shrub	0.651478	0.032978	2	Pristine	Pristine	Boreal	Peatland (bog)	ombrotrophic	overall	seasonally	Shrub	0.764121	0.0166861	2
Drainage	Forestry	Boreal	Peatland (bog)	ombrotrophic	overall	seasonally	Shrub	0.79782	0.0616061	5	Drainage	Forestry	Boreal	Peatland (bog)	ombrotrophic	overall	seasonally	Shrub	0.928136	0.0445981	5
Pristine	Pristine	Boreal	Peatland (fen)	mesotrophic	overall	seasonally	Cyperaceae	0.732628	0.0570793	9	Pristine	Pristine	Boreal	Peatland (fen)	mesotrophic	overall	seasonally	Cyperaceae	0.897522	0.0976625	9
Drainage	Forestry	Boreal	Peatland (fen)	mesotrophic	overall	seasonally	Cyperaceae	0.859924	0.0362831	11	Drainage	Forestry	Boreal	Peatland (fen)	mesotrophic	overall	seasonally	Cyperaceae	0.928136	0.0445981	5
Drainage	Forestry	Boreal	Peatland (fen)	ombrotrophic	hummock	seasonally	Peat moss	0.859924	0.0362831	11	Drainage	Forestry	Boreal	Peatland (fen)	ombrotrophic	hummock	seasonally	Peat moss	0.928136	0.0445981	5
Drainage	Forestry	Boreal	Peatland (fen)	ombrotrophic	lawn	seasonally	Peat moss	0.859924	0.0362831	11	Drainage	Forestry	Boreal	Peatland (fen)	ombrotrophic	lawn	seasonally	Peat moss	0.928136	0.0445981	5
Drainage	Forestry	Boreal	Peatland (fen)	ombrotrophic	hollow	seasonally	Peat moss	0.859924	0.0362831	11	Drainage	Forestry	Boreal	Peatland (fen)	ombrotrophic	hollow	seasonally	Peat moss	0.928136	0.0445981	5
Pristine	Pristine	Boreal	Peatland (fen)	minerotrophic	overall	seasonally	Forest	0.715256	0.0248914	8	Pristine	Pristine	Boreal	Peatland (fen)	minerotrophic	overall	seasonally	Forest	0.884712	0.095983	8
Drainage	Forestry	Boreal	Peatland (fen)	minerotrophic	overall	seasonally	Forest	0.859924	0.0362831	11	Drainage	Forestry	Boreal	Peatland (fen)	minerotrophic	overall	seasonally	Forest	0.928136	0.0445981	5
Pristine	Pristine	Boreal	Peatland (bog)	ombrotrophic	overall	seasonally	Forest	0.694861	0.0920499	0.0920499	Pristine	Pristine	Boreal	Peatland (bog)	ombrotrophic	overall	seasonally	Forest	0.833084	0.0749009	0.0749009
Drainage	Forestry	Boreal	Peatland (bog)	ombrotrophic	overall	seasonally	Forest	0.859924	0.0362831	11	Drainage	Forestry	Boreal	Peatland (bog)	ombrotrophic	overall	seasonally	Forest	0.928136	0.0445981	5
Pristine	Pristine	Boreal	Peatland (bog)	ombrotrophic	overall	seasonally	Peat moss	0.719108	0.114709	6	Pristine	Pristine	Boreal	Peatland (bog)	ombrotrophic	overall	seasonally	Peat moss	0.883063	0.0501993	6
Drainage	Forestry	Boreal	Peatland (bog)	ombrotrophic	overall	seasonally	Peat moss	0.859924	0.0362831	11	Drainage	Forestry	Boreal	Peatland (bog)	ombrotrophic	overall	seasonally	Peat moss	0.928136	0.0445981	5
Pristine	Pristine	Boreal	Peatland (bog)	ombrotrophic	hummock	seasonally	Peat moss	0.719108	0.114709	6	Pristine	Pristine	Boreal	Peatland (bog)	ombrotrophic	hummock	seasonally	Peat moss	0.883063	0.0501993	6
Drainage	Forestry	Boreal	Peatland (bog)	ombrotrophic	hummock	seasonally	Peat moss	0.859924	0.0362831	11	Drainage	Forestry	Boreal	Peatland (bog)	ombrotrophic	hummock	seasonally	Peat moss	0.928136	0.0445981	5
Pristine	Pristine	Boreal	Peatland (fen)	minerotrophic	overall	seasonally	Cyperaceae	0.732628	0.0570793	9	Pristine	Pristine	Boreal	Peatland (fen)	minerotrophic	overall	seasonally	Cyperaceae	0.897522	0.0976625	9
Drainage	Forestry	Boreal	Peatland (fen)	minerotrophic	overall	seasonally	Cyperaceae	0.859924	0.0362831	11	Drainage	Forestry	Boreal	Peatland (fen)	minerotrophic	overall	seasonally	Cyperaceae	0.928136	0.0445981	5
Pristine	Pristine	Boreal	Peatland (fen)	minerotrophic	overall	seasonally	Cyperaceae	0.732628	0.0570793	9	Pristine	Pristine	Boreal	Peatland (fen)	minerotrophic	overall	seasonally	Cyperaceae	0.897522	0.0976625	9
Drainage	Climate drying	Boreal	Peatland (fen)	minerotrophic	overall	seasonally	Cyperaceae	0.859924	0.0362831	11	Drainage	Hydrology simulation	Boreal	Peatland (fen)	minerotrophic	overall	seasonally	Cyperaceae	0.964027	0.0231821	11
Pristine	Pristine	Boreal	Peatland (fen)	ombrotrophic	hummock	seasonally	Peat moss	0.803208	0.01168	2	Pristine	Pristine	Boreal	Peatland (fen)	ombrotrophic	hummock	seasonally	Peat moss	0.953159	0.0187795	2
Drainage	Climate drying	Boreal	Peatland (fen)	ombrotrophic	hummock	seasonally	Peat moss	0.859924	0.0362831	11	Drainage	Hydrology simulation	Boreal	Peatland (fen)	ombrotrophic	hummock	seasonally	Peat moss	0.964027	0.0231821	11
Pristine	Pristine	Boreal	Peatland (fen)	ombrotrophic	lawn	seasonally	Peat moss	0.803208	0.01168	2	Pristine	Pristine	Boreal	Peatland (fen)	ombrotrophic	lawn	seasonally	Peat moss	0.953159	0.0187795	2
Drainage	Climate drying	Boreal	Peatland (fen)	ombrotrophic	lawn	seasonally	Peat moss	0.859924	0.0362831	11	Drainage	Hydrology simulation	Boreal	Peatland (fen)	ombrotrophic	lawn	seasonally	Peat moss	0.964027	0.0231821	11
Pristine	Pristine	Boreal	Peatland (fen)	ombrotrophic	hollow	seasonally	Cyperaceae	0.803208	0.01168	2	Pristine	Pristine	Boreal	Peatland (fen)	ombrotrophic	hollow	seasonally	Cyperaceae	0.953159	0.0187795	2
Drainage	Climate drying	Boreal	Peatland (fen)	ombrotrophic	hollow	seasonally	Cyperaceae	0.859924	0.0362831	11	Drainage	Hydrology simulation	Boreal	Peatland (fen)	ombrotrophic	hollow	seasonally	Cyperaceae	0.964027	0.0231821	11
Pristine	Pristine	Boreal	Peatland (fen)	minerotrophic	overall	permanently	Cyperaceae	0.815731	0.0087874	2	Pristine	Pristine	Boreal	Peatland (fen)	minerotrophic	overall	permanently	Cyperaceae	1	0	2
Drainage	Climate drying	Boreal	Peatland (fen)	minerotrophic	overall	permanently	Cyperaceae	0.859924	0.0362831	11	Drainage	Hydrology simulation	Boreal	Peatland (fen)	minerotrophic	overall	permanently	Cyperaceae	0.964027	0.0231821	11
Pristine	Pristine	Boreal	Peatland (fen)	minerotrophic	overall	permanently	shrub	0.815731	0.0087874	2	Pristine	Pristine	Boreal	Peatland (fen)	minerotrophic	overall	permanently	shrub	1	0	2
Drainage	Climate drying	Boreal	Peatland (fen)	minerotrophic	overall	permanently	shrub	0.859924	0.0362831	11	Drainage	Hydrology simulation	Boreal	Peatland (fen)	minerotrophic	overall	permanently	shrub	0.964027	0.0231821	11
Pristine	Pristine	Boreal	Peatland (fen)	minerotrophic	overall	seasonally	Peat moss	0.732628	0.0570793	9	Pristine	Pristine	Boreal	Peatland (fen)	minerotrophic	overall	seasonally	Peat moss	0.897522	0.0976625	9
Drainage	Climate drying	Boreal	Peatland (fen)	minerotrophic	overall	seasonally	Peat moss	0.859924	0.0362831	11	Drainage	Hydrology simulation	Boreal	Peatland (fen)	minerotrophic	overall	seasonally	Peat moss	0.964027	0.0231821	11
