# Supplementary material for: Declines of peatland water table forces climate warming despite methane emission drawdown
Source: Research Square preprint supplement (doi:10.21203/rs.3.rs-2839705/v1), 2023-05-08
Supplement: Supplementary file 2 [file 1a92d0b64743156ce2b2135e.xlsx]

## Sheet: GHG fluxes
References	Treatment	Drainage Purpose	Climatic conditions	Organic C input (kg CO2-eq. ha-1 yr-1)	Control	SD	n	Harvested NPP (kg CO2-eq. ha-1 yr-1)	Control	SD	n	DOC export (kg CO2-eq. ha-1 yr-1)	Control	SD	n	DIC export (kg CO2-eq. ha-1 yr-1)	Control	SD	n	Ditches CO2 emission (kg CO2-eq. ha-1 yr-1)	Control	SD	n	Ditches CH4 emission (kg CO2-eq. ha-1 yr-1)	Control	SD	n	Ditches N2O emission (kg CO2-eq. ha-1 yr-1)	Control	SD	n	Livetock fermentation (kg CO2-eq. ha-1 yr-1)	Control	SD	n	Ditches area percent (%)			CO2 part (kg CO2-eq. ha-1 yr-1)		CH4 part (kg CO2-eq. ha-1 yr-1)		N2O part (kg CO2-eq. ha-1 yr-1)		References
Billett et al. 2004	Drained		Temperate									83	304.333																																Billett et al. 2004. Linking land-atmosphere-stream carbon fluxes in a lowland peatland system
Billett et al. 2004	Drained		Temperate									84	308																																Billett et al. 2004. Linking land-atmosphere-stream carbon fluxes in a lowland peatland system
Billett et al. 2004	Drained		Temperate									100	366.667																																Billett et al. 2004. Linking land-atmosphere-stream carbon fluxes in a lowland peatland system
Billett et al. 2004	Drained		Temperate									121	443.667																																Billett et al. 2004. Linking land-atmosphere-stream carbon fluxes in a lowland peatland system
Billett et al. 2004	Drained		Temperate									150	550																																Billett et al. 2004. Linking land-atmosphere-stream carbon fluxes in a lowland peatland system
Billett et al. 2004	Drained		Temperate									430	1576.67																																Billett et al. 2004. Linking land-atmosphere-stream carbon fluxes in a lowland peatland system
Billett et al. 2004	Drained		Temperate									294	1078																																Billett et al. 2004. Linking land-atmosphere-stream carbon fluxes in a lowland peatland system
Billett et al. 2004	Drained		Temperate									300	1100																																Billett et al. 2004. Linking land-atmosphere-stream carbon fluxes in a lowland peatland system
Billett et al. 2004	Drained		Temperate									304	1114.67	227.333																															Billett et al. 2004. Linking land-atmosphere-stream carbon fluxes in a lowland peatland system
Billett et al. 2004	Drained		Temperate									323	1184.33																																Billett et al. 2004. Linking land-atmosphere-stream carbon fluxes in a lowland peatland system
Billett et al. 2004	Drained		Temperate									390	1430																																Billett et al. 2004. Linking land-atmosphere-stream carbon fluxes in a lowland peatland system
Billett et al. 2004	Drained		Temperate									200	733.333																																Billett et al. 2004. Linking land-atmosphere-stream carbon fluxes in a lowland peatland system
Billett et al. 2004	Drained		Temperate									400	1466.67																																Billett et al. 2004. Linking land-atmosphere-stream carbon fluxes in a lowland peatland system
Billett et al. 2004	Drained		Temperate									500	1833.33																																Billett et al. 2004. Linking land-atmosphere-stream carbon fluxes in a lowland peatland system
IPCC 2014	Drained		Boreal									120	440																																IPCC 2014
IPCC 2014	Drained		Temperate									310	1136.67																																IPCC 2014
IPCC 2014	Drained		Tropical									820	3006.67																																IPCC 2014
Strack and Zuback, 2013	Drained	Peat extraction	Temperate									288	1056		3						18124.3	3604.02	3		7026.67	8721.57	3									4.8									Strack and Zuback, 2013. Annual carbon balance of a peatland 10 yr following restoration
Lohila et al. 2011	Drained	Forestry	Boreal																																										Lohila et al. 2011. Greenhouse gas flux measurements in a forestry-drained peatland indicate a large carbon sink
Järveoja et al. 2016	Drained	Peat extraction	Temperate																																										Järveoja et al. 2016. Impact of water table level on annual carbon and greenhouse gas balances of a restored peat extraction area
Hommeltenberg et al. 2014	Drained	Forestry	Temperate																																										Hommeltenberg et al. 2014. Can a bog drained for forestry be a stronger carbon sink than a natural bog forest?
Hommeltenberg et al. 2014	Drained	Forestry	Temperate																																										Hommeltenberg et al. 2014. Can a bog drained for forestry be a stronger carbon sink than a natural bog forest?
Kittler et al. 2017	Drained	WT manipulation	Arctic																																										Kittler et al. 2017. Long-Term Drainage Reduces CO2 Uptake and CH4 Emissions in a Siberian Permafrost Ecosystem
Kittler et al. 2017	Drained	WT manipulation	Arctic																																										Kittler et al. 2017. Long-Term Drainage Reduces CO2 Uptake and CH4 Emissions in a Siberian Permafrost Ecosystem
Kittler et al. 2017	Drained	WT manipulation	Arctic																																										Kittler et al. 2017. Long-Term Drainage Reduces CO2 Uptake and CH4 Emissions in a Siberian Permafrost Ecosystem
Kittler et al. 2017	Drained	WT manipulation	Arctic																																										Kittler et al. 2017. Long-Term Drainage Reduces CO2 Uptake and CH4 Emissions in a Siberian Permafrost Ecosystem
Peichl et al. 2014	Drained	WT manipulation	Boreal																																										Peichl et al. 2014. A 12-year record reveals pre-growing season temperature and water table level threshold effects on the net carbon dioxide exchange in a boreal fen
Peichl et al. 2014	Drained	WT manipulation	Boreal																																										Peichl et al. 2014. A 12-year record reveals pre-growing season temperature and water table level threshold effects on the net carbon dioxide exchange in a boreal fen
Peichl et al. 2014	Drained	WT manipulation	Boreal																																										Peichl et al. 2014. A 12-year record reveals pre-growing season temperature and water table level threshold effects on the net carbon dioxide exchange in a boreal fen
Peichl et al. 2014	Drained	WT manipulation	Boreal																																										Peichl et al. 2014. A 12-year record reveals pre-growing season temperature and water table level threshold effects on the net carbon dioxide exchange in a boreal fen
Peichl et al. 2014	Drained	WT manipulation	Boreal																																										Peichl et al. 2014. A 12-year record reveals pre-growing season temperature and water table level threshold effects on the net carbon dioxide exchange in a boreal fen
Peichl et al. 2014	Drained	WT manipulation	Boreal																																										Peichl et al. 2014. A 12-year record reveals pre-growing season temperature and water table level threshold effects on the net carbon dioxide exchange in a boreal fen
Peichl et al. 2014	Drained	WT manipulation	Boreal																																										Peichl et al. 2014. A 12-year record reveals pre-growing season temperature and water table level threshold effects on the net carbon dioxide exchange in a boreal fen
Peichl et al. 2014	Drained	WT manipulation	Boreal																																										Peichl et al. 2014. A 12-year record reveals pre-growing season temperature and water table level threshold effects on the net carbon dioxide exchange in a boreal fen
Peichl et al. 2014	Drained	WT manipulation	Boreal																																										Peichl et al. 2014. A 12-year record reveals pre-growing season temperature and water table level threshold effects on the net carbon dioxide exchange in a boreal fen
Peichl et al. 2014	Drained	WT manipulation	Boreal																																										Peichl et al. 2014. A 12-year record reveals pre-growing season temperature and water table level threshold effects on the net carbon dioxide exchange in a boreal fen
Peichl et al. 2014	Drained	WT manipulation	Boreal																																										Peichl et al. 2014. A 12-year record reveals pre-growing season temperature and water table level threshold effects on the net carbon dioxide exchange in a boreal fen
Peichl et al. 2014	Drained	WT manipulation	Boreal																																										Peichl et al. 2014. A 12-year record reveals pre-growing season temperature and water table level threshold effects on the net carbon dioxide exchange in a boreal fen
Aslan-Sungur et al. 2016	Drained	Peat extraction	Temperate																																										Aslan-Sungur et al. 2016. Large interannual variability in net ecosystem carbon dioxide exchange of a disturbed temperate peatland
Aslan-Sungur et al. 2016	Drained	Peat extraction	Temperate																																										Aslan-Sungur et al. 2016. Large interannual variability in net ecosystem carbon dioxide exchange of a disturbed temperate peatland
Aslan-Sungur et al. 2016	Drained	Peat extraction	Temperate																																										Aslan-Sungur et al. 2016. Large interannual variability in net ecosystem carbon dioxide exchange of a disturbed temperate peatland
Minkkinen et al. 2018	Drained	Forestry	Boreal																						748		4									2.5									Minkkinen et al. 2018. Persistent carbon sink at a boreal drained bog forest
Minkkinen et al. 2018	Drained	Forestry	Boreal																																										Minkkinen et al. 2018. Persistent carbon sink at a boreal drained bog forest
Minkkinen et al. 2018	Drained	Forestry	Boreal																																										Minkkinen et al. 2018. Persistent carbon sink at a boreal drained bog forest
Minkkinen et al. 2018	Drained	Forestry	Boreal																																										Minkkinen et al. 2018. Persistent carbon sink at a boreal drained bog forest
Zhao et al. 2010	Drained	Grassland	Temperate																																										Zhao et al. 2010. Seasonal variations in carbon dioxide exchange in an alpine wetland meadow on the Qinghai-Tibetan Plateau
Zhao et al. 2010	Drained	Grassland	Temperate																																										Zhao et al. 2010. Seasonal variations in carbon dioxide exchange in an alpine wetland meadow on the Qinghai-Tibetan Plateau
Zhao et al. 2010	Drained	Grassland	Temperate																																										Zhao et al. 2010. Seasonal variations in carbon dioxide exchange in an alpine wetland meadow on the Qinghai-Tibetan Plateau
Ratcliffe et al. 2019b	Drained	Agriculture	Temperate																																										Ratcliffe et al. 2019b. Water table fluctuations control CO2 exchange in wet and dry bogs through different mechanisms
Ratcliffe et al. 2019b	Drained	Agriculture	Temperate																																										Ratcliffe et al. 2019b. Water table fluctuations control CO2 exchange in wet and dry bogs through different mechanisms
Knox et al. 2015	Drained	Grassland	Mediterranean																																										Knox et al. 2015. Agricultural peatland restoration: effects of land-use change on greenhouse gas (CO2 and CH4) fluxes in the Sacramento-San Joaquin Delta
Knox et al. 2015	Drained	Agriculture	Mediterranean					kg CO2 ha-1 yr-1	10743.3		3																																		Knox et al. 2015. Agricultural peatland restoration: effects of land-use change on greenhouse gas (CO2 and CH4) fluxes in the Sacramento-San Joaquin Delta
Hatala et al. 2012	Drained	Grassland	Mediterranean																																										Hatala et al. 2012. Greenhouse gas (CO2, CH4, H2O) fluxes from drained and flooded agricultural peatlands in the Sacramento-San Joaquin Delta
Hatala et al. 2012	Drained	Grassland	Mediterranean																																										Hatala et al. 2012. Greenhouse gas (CO2, CH4, H2O) fluxes from drained and flooded agricultural peatlands in the Sacramento-San Joaquin Delta
Hirano et al. 2007	Drained	Agriculture	Tropical																																										Hirano et al. 2007. Carbon dioxide balance of a tropical peat swamp forest in Kalimantan, Indonesia
Hirano et al. 2007	Drained	Agriculture	Tropical																																										Hirano et al. 2007. Carbon dioxide balance of a tropical peat swamp forest in Kalimantan, Indonesia
Hirano et al. 2007	Drained	Agriculture	Tropical																																										Hirano et al. 2007. Carbon dioxide balance of a tropical peat swamp forest in Kalimantan, Indonesia
Meyer et al. 2013	Drained	Agriculture	Boreal																																										Meyer et al. 2013. A fertile peatland forest does not constitute a major greenhouse gas sink
Dommain et al. 2018	Drained	Agriculture	Tropical																																										Dommain et al. 2018. A radiative forcing analysis of tropical peatlands before and after their conversion to agricultural plantations
Dommain et al. 2018	Drained	Agriculture	Tropical																																										Dommain et al. 2018. A radiative forcing analysis of tropical peatlands before and after their conversion to agricultural plantations
Dommain et al. 2018	Drained	Agriculture	Tropical																																										Dommain et al. 2018. A radiative forcing analysis of tropical peatlands before and after their conversion to agricultural plantations
Dommain et al. 2018	Drained	Agriculture	Tropical																																										Dommain et al. 2018. A radiative forcing analysis of tropical peatlands before and after their conversion to agricultural plantations
Dommain et al. 2018	Drained	Agriculture	Tropical																																										Dommain et al. 2018. A radiative forcing analysis of tropical peatlands before and after their conversion to agricultural plantations
Schrier-Uijl et al. 2014	Drained	Grassland	Temperate	kg CO2 ha-1 yr-1	-5756.67			kg CO2 ha-1 yr-1	9460																																				Schrier-Uijl et al. 2014. Agricultural peatlands: towards a greenhouse gas sink – a synthesis of a Dutch landscape study
Schrier-Uijl et al. 2014	Drained	Grassland	Temperate	kg CO2 ha-1 yr-1	-5756.67			kg CO2 ha-1 yr-1	9460																																				Schrier-Uijl et al. 2014. Agricultural peatlands: towards a greenhouse gas sink – a synthesis of a Dutch landscape study
Schrier-Uijl et al. 2014	Drained	Grassland	Temperate	kg CO2 ha-1 yr-1	-5756.67			kg CO2 ha-1 yr-1	9460																																				Schrier-Uijl et al. 2014. Agricultural peatlands: towards a greenhouse gas sink – a synthesis of a Dutch landscape study
Schrier-Uijl et al. 2014	Drained	Grassland	Temperate	kg CO2 ha-1 yr-1	-5756.67			kg CO2 ha-1 yr-1	9460																																				Schrier-Uijl et al. 2014. Agricultural peatlands: towards a greenhouse gas sink – a synthesis of a Dutch landscape study
Schrier-Uijl et al. 2014	Drained	Grassland	Temperate	kg CO2 ha-1 yr-1	-5756.67			kg CO2 ha-1 yr-1	15400																																				Schrier-Uijl et al. 2014. Agricultural peatlands: towards a greenhouse gas sink – a synthesis of a Dutch landscape study
Schrier-Uijl et al. 2014	Drained	Grassland	Temperate	kg CO2 ha-1 yr-1	-5756.67			kg CO2 ha-1 yr-1	15400																																				Schrier-Uijl et al. 2014. Agricultural peatlands: towards a greenhouse gas sink – a synthesis of a Dutch landscape study
Schrier-Uijl et al. 2014	Drained	Grassland	Temperate	kg CO2 ha-1 yr-1	-5756.67			kg CO2 ha-1 yr-1	15400																																				Schrier-Uijl et al. 2014. Agricultural peatlands: towards a greenhouse gas sink – a synthesis of a Dutch landscape study
Schrier-Uijl et al. 2014	Drained	Grassland	Temperate	kg CO2 ha-1 yr-1	-5756.67			kg CO2 ha-1 yr-1	15400																																				Schrier-Uijl et al. 2014. Agricultural peatlands: towards a greenhouse gas sink – a synthesis of a Dutch landscape study
Kandel et al. 2017	Drained	Agriculture	Temperate					kg CO2 ha-1 yr-1	34833.3																																				Kandel et al. 2017. Annual balances and extended seasonal modelling of carbon fluxes from a temperate fen cropped to festulolium and tall fescue under two-cut and three-cut harvesting regimes
Kandel et al. 2017	Drained	Agriculture	Temperate					kg CO2 ha-1 yr-1	29333.3																																				Kandel et al. 2017. Annual balances and extended seasonal modelling of carbon fluxes from a temperate fen cropped to festulolium and tall fescue under two-cut and three-cut harvesting regimes
Lloyd 2006	Drained	Agriculture	Temperate					kg CO2 ha-1 yr-1	8360																																				Lloyd 2006. Annual carbon balance of a managed wetland meadow in the Somerset Levels, UK
Lohila et al. 2004	Drained	Agriculture	Boreal					kg CO2 ha-1 yr-1	4620																																				Lohila et al. 2004. Annual CO2 exchange of a peat field growing spring barley or perennial forage grass
Lohila et al. 2004	Drained	Agriculture	Boreal					kg CO2 ha-1 yr-1	13676.7																																				Lohila et al. 2004. Annual CO2 exchange of a peat field growing spring barley or perennial forage grass
Karki et al. 2019	Drained	Agriculture	Temperate					kg CO2 ha-1 yr-1	25666.7																																				Karki et al. 2019. Annual CO2 fluxes from a cultivated fen with perennial grasses during two initial years of rewetting
Karki et al. 2019	Drained	Agriculture	Temperate					kg CO2 ha-1 yr-1	18333.3																																				Karki et al. 2019. Annual CO2 fluxes from a cultivated fen with perennial grasses during two initial years of rewetting
Evrendilek, 2015	Drained	Forestry	Temperate																																										Evrendilek, 2015. Assessing CO2 sink/source strength of a degraded temperate peatland: atmospheric and hydrological drivers and responses to extreme events
Evrendilek, 2015	Drained	Forestry	Temperate																																										Evrendilek, 2015. Assessing CO2 sink/source strength of a degraded temperate peatland: atmospheric and hydrological drivers and responses to extreme events
Evrendilek, 2015	Drained	Forestry	Temperate																																										Evrendilek, 2015. Assessing CO2 sink/source strength of a degraded temperate peatland: atmospheric and hydrological drivers and responses to extreme events
Hemes et al. 2019	Drained	Agriculture	Mediterranean																																										Hemes et al. 2019. Assessing the carbon and climate benefit of restoring degraded agricultural peat soils to managed wetlands
Hemes et al. 2019	Drained	Agriculture	Mediterranean					kg CO2 ha-1 yr-1	10743.3	2493.33	4																																		Hemes et al. 2019. Assessing the carbon and climate benefit of restoring degraded agricultural peat soils to managed wetlands
Hemes et al. 2019	Drained	Agriculture	Mediterranean					kg CO2 ha-1 yr-1	26106.7	6013.33	4																																		Hemes et al. 2019. Assessing the carbon and climate benefit of restoring degraded agricultural peat soils to managed wetlands
Hemes et al. 2019	Drained	Agriculture	Mediterranean					kg CO2 ha-1 yr-1	26216.7	5500	4																																		Hemes et al. 2019. Assessing the carbon and climate benefit of restoring degraded agricultural peat soils to managed wetlands
Hemes et al. 2019	Drained	Agriculture	Mediterranean					kg CO2 ha-1 yr-1	21816.7	5023.33	4																																		Hemes et al. 2019. Assessing the carbon and climate benefit of restoring degraded agricultural peat soils to managed wetlands
Shurpali et al. 2010	Drained	Agriculture	Boreal					kg CO2 ha-1 yr-1	5127																																				Shurpali et al. 2010. Atmospheric impact of bioenergy based on perennial crop (reed canary grass, Phalaris arundinaceae, L.) cultivation on a drained boreal organic soil
Shurpali et al. 2010	Drained	Agriculture	Boreal					kg CO2 ha-1 yr-1	2772																																				Shurpali et al. 2010. Atmospheric impact of bioenergy based on perennial crop (reed canary grass, Phalaris arundinaceae, L.) cultivation on a drained boreal organic soil
Shurpali et al. 2010	Drained	Agriculture	Boreal					kg CO2 ha-1 yr-1	4989																																				Shurpali et al. 2010. Atmospheric impact of bioenergy based on perennial crop (reed canary grass, Phalaris arundinaceae, L.) cultivation on a drained boreal organic soil
Shurpali et al. 2010	Drained	Agriculture	Boreal					kg CO2 ha-1 yr-1	6513																																				Shurpali et al. 2010. Atmospheric impact of bioenergy based on perennial crop (reed canary grass, Phalaris arundinaceae, L.) cultivation on a drained boreal organic soil
Shurpali et al. 2010	Drained	Agriculture	Boreal					kg CO2 ha-1 yr-1	4157																																				Shurpali et al. 2010. Atmospheric impact of bioenergy based on perennial crop (reed canary grass, Phalaris arundinaceae, L.) cultivation on a drained boreal organic soil
Hoffmann et al. 2015	Drained	Agriculture	Temperate																																										Hoffmann et al. 2015. Automated modeling of ecosystem CO2fluxes based on periodicclosed chamber measurements: A standardized conceptual andpractical approach
Peichl et al. 2015	Drained		Boreal																																										Peichl et al. 2015. Bringing Color into the Picture: Using Digital Repeat Photography to Investigate Phenology Controls of the Carbon Dioxide Exchange in a Boreal Mire
Peichl et al. 2015	Drained		Boreal																																										Peichl et al. 2015. Bringing Color into the Picture: Using Digital Repeat Photography to Investigate Phenology Controls of the Carbon Dioxide Exchange in a Boreal Mire
Swenson et al. 2019	Drained	Peat extraction	Temperate									104	381.333	176	4																														Swenson et al. 2019. Carbon balance of a restored and cutover raised bog: implications for restoration and comparison to global trends
Swenson et al. 2019	Drained	Peat extraction	Temperate																																										Swenson et al. 2019. Carbon balance of a restored and cutover raised bog: implications for restoration and comparison to global trends
Swenson et al. 2019	Drained	Peat extraction	Temperate																																										Swenson et al. 2019. Carbon balance of a restored and cutover raised bog: implications for restoration and comparison to global trends
Swenson et al. 2019	Drained	Peat extraction	Temperate																																										Swenson et al. 2019. Carbon balance of a restored and cutover raised bog: implications for restoration and comparison to global trends
Swenson et al. 2019	Drained	Peat extraction	Temperate																																										Swenson et al. 2019. Carbon balance of a restored and cutover raised bog: implications for restoration and comparison to global trends
Swenson et al. 2019	Drained	Peat extraction	Temperate																																										Swenson et al. 2019. Carbon balance of a restored and cutover raised bog: implications for restoration and comparison to global trends
Hargreaves and Cannel, 2003	Drained	Agriculture	Temperate																																										Hargreaves and Cannel, 2003. Carbon balance of afforested peatland in Scotland
Hargreaves and Cannel, 2003	Drained	Agriculture, abandoned	Temperate																																										Hargreaves and Cannel, 2003. Carbon balance of afforested peatland in Scotland
Hargreaves and Cannel, 2003	Drained	Forestry	Temperate																																										Hargreaves and Cannel, 2003. Carbon balance of afforested peatland in Scotland
Rankin et al. 2018	Drained	Peat extraction	Temperate																																										Rankin et al. 2018. Carbon dioxide and methane exchange at a post-extraction, unrestored peatland
Rankin et al. 2018	Drained	Peat extraction	Temperate																																										Rankin et al. 2018. Carbon dioxide and methane exchange at a post-extraction, unrestored peatland
Kiew et al. 2020	Drained	Agriculture	Tropical																																										Kiew et al. 2020. Carbon dioxide balance of an oil palm plantation established on tropical peat
Kiew et al. 2020	Drained	Agriculture	Tropical																																										Kiew et al. 2020. Carbon dioxide balance of an oil palm plantation established on tropical peat
Kiew et al. 2020	Drained	Agriculture	Tropical																																										Kiew et al. 2020. Carbon dioxide balance of an oil palm plantation established on tropical peat
Kiew et al. 2020	Drained	Agriculture	Tropical																																										Kiew et al. 2020. Carbon dioxide balance of an oil palm plantation established on tropical peat
Lohila et al. 2007	Drained	Forestry	Boreal																																										Lohila et al. 2007. Carbon dioxide exchange above a 30-year-old Scots pine plantation established on organic-soil cropland
Zhong et al. 2016	Drained	Agriculture	Subtropical																																										Zhong et al. 2016. Carbon Dioxide Fluxes and Their Environmental Control in a Reclaimed Coastal Wetland in the Yangtze Estuary
Nieveen et al. 2005	Drained	Grassland	Temperate																																										Nieveen et al. 2005. Carbon exchange of grazed pasture on a drained peat soil
Chu et al. 2019	Drained	Agriculture	Temperate																																										Chu et al. 2019. Changes in plant biomass induced by soil moisture variability drive interannual variation in the net ecosystem CO2 exchange over a reclaimed coastal wetland
Chu et al. 2019	Drained	Agriculture	Temperate																																										Chu et al. 2019. Changes in plant biomass induced by soil moisture variability drive interannual variation in the net ecosystem CO2 exchange over a reclaimed coastal wetland
Chu et al. 2019	Drained	Agriculture	Temperate																																										Chu et al. 2019. Changes in plant biomass induced by soil moisture variability drive interannual variation in the net ecosystem CO2 exchange over a reclaimed coastal wetland
Chu et al. 2019	Drained	Agriculture	Temperate																																										Chu et al. 2019. Changes in plant biomass induced by soil moisture variability drive interannual variation in the net ecosystem CO2 exchange over a reclaimed coastal wetland
Chu et al. 2019	Drained	Agriculture	Temperate																																										Chu et al. 2019. Changes in plant biomass induced by soil moisture variability drive interannual variation in the net ecosystem CO2 exchange over a reclaimed coastal wetland
Veenendaal et al. 2007	Drained	Agriculture	Temperate					kg CO2 ha-1 yr-1	15766.7																																				Veenendaal et al. 2007. CO2 exchange and carbon balance in two grassland sites on eutrophic drained peat soils
Veenendaal et al. 2007	Drained	Grassland	Temperate					kg CO2 ha-1 yr-1	9826.67																																				Veenendaal et al. 2007. CO2 exchange and carbon balance in two grassland sites on eutrophic drained peat soils
Metzger et al. 2015	Drained	Agriculture	Temperate																																										Metzger et al. 2015. CO2 fluxes and ecosystem dynamics at five European treeless peatlands - merging data and process oriented modeling
Metzger et al. 2015	Drained	Agriculture	Temperate																																										Metzger et al. 2015. CO2 fluxes and ecosystem dynamics at five European treeless peatlands - merging data and process oriented modeling
Metzger et al. 2015	Drained	Agriculture	Temperate																																										Metzger et al. 2015. CO2 fluxes and ecosystem dynamics at five European treeless peatlands - merging data and process oriented modeling
Metzger et al. 2015	Drained	Agriculture	Temperate																																										Metzger et al. 2015. CO2 fluxes and ecosystem dynamics at five European treeless peatlands - merging data and process oriented modeling
Metzger et al. 2015	Drained	Agriculture	Temperate																																										Metzger et al. 2015. CO2 fluxes and ecosystem dynamics at five European treeless peatlands - merging data and process oriented modeling
Metzger et al. 2015	Drained	Agriculture	Temperate																																										Metzger et al. 2015. CO2 fluxes and ecosystem dynamics at five European treeless peatlands - merging data and process oriented modeling
Metzger et al. 2015	Drained	Agriculture	Temperate																																										Metzger et al. 2015. CO2 fluxes and ecosystem dynamics at five European treeless peatlands - merging data and process oriented modeling
Metzger et al. 2015	Drained	Agriculture	Temperate																																										Metzger et al. 2015. CO2 fluxes and ecosystem dynamics at five European treeless peatlands - merging data and process oriented modeling
Poyda et al. 2017	Drained	Agriculture	Temperate																																										Poyda et al. 2017. Comparing chamber and eddy covariance based net ecosystem CO2 exchange of fen soils
Poyda et al. 2017	Drained	Agriculture	Temperate																																										Poyda et al. 2017. Comparing chamber and eddy covariance based net ecosystem CO2 exchange of fen soils
Holl et al. 2020	Drained	Peat extraction, bare peat, abandoned	Temperate																																										Holl et al. 2020. Comparison of eddy covariance CO2 and CH4 fluxes from mined and recently rewetted sections in a northwestern German cutover bog
Holl et al. 2020	Drained	Peat extraction, bare peat, abandoned	Temperate																																										Holl et al. 2020. Comparison of eddy covariance CO2 and CH4 fluxes from mined and recently rewetted sections in a northwestern German cutover bog
Sulman et al. 2009	Drained		Temperate																																										Sulman et al. 2009. Contrasting carbon dioxide fluxes between a drying shrub wetland in Northern Wisconsin, USA, and nearby forests
Sulman et al. 2009	Drained		Temperate																																										Sulman et al. 2009. Contrasting carbon dioxide fluxes between a drying shrub wetland in Northern Wisconsin, USA, and nearby forests
Sulman et al. 2009	Drained		Temperate																																										Sulman et al. 2009. Contrasting carbon dioxide fluxes between a drying shrub wetland in Northern Wisconsin, USA, and nearby forests
Sulman et al. 2009	Drained		Temperate																																										Sulman et al. 2009. Contrasting carbon dioxide fluxes between a drying shrub wetland in Northern Wisconsin, USA, and nearby forests
Sulman et al. 2009	Drained		Temperate																																										Sulman et al. 2009. Contrasting carbon dioxide fluxes between a drying shrub wetland in Northern Wisconsin, USA, and nearby forests
Sulman et al. 2009	Drained		Temperate																																										Sulman et al. 2009. Contrasting carbon dioxide fluxes between a drying shrub wetland in Northern Wisconsin, USA, and nearby forests
Shurpali et al. 2009	Drained	Agriculture	Boreal					kg CO2 ha-1 yr-1	5133.33																																				Shurpali et al. 2009. Cultivation of a perennial grass for bioenergy on a boreal organic soil – carbon sink or source
Shurpali et al. 2009	Drained	Agriculture	Boreal					kg CO2 ha-1 yr-1	2772.12																																				Shurpali et al. 2009. Cultivation of a perennial grass for bioenergy on a boreal organic soil – carbon sink or source
Shurpali et al. 2009	Drained	Agriculture	Boreal					kg CO2 ha-1 yr-1	4986.67																																				Shurpali et al. 2009. Cultivation of a perennial grass for bioenergy on a boreal organic soil – carbon sink or source
Shurpali et al. 2009	Drained	Agriculture	Boreal					kg CO2 ha-1 yr-1	6636.67																																				Shurpali et al. 2009. Cultivation of a perennial grass for bioenergy on a boreal organic soil – carbon sink or source
Rocha and Goulden, 2010	Drained	WT manipulation	Mediterranean																																										Rocha et al. 2010. Drought legacies influence the long-term carbon balance of a freshwater marsh
Rocha and Goulden, 2010	Drained	WT manipulation	Mediterranean																																										Rocha et al. 2010. Drought legacies influence the long-term carbon balance of a freshwater marsh
Rocha and Goulden, 2010	Drained	WT manipulation	Mediterranean																																										Rocha et al. 2010. Drought legacies influence the long-term carbon balance of a freshwater marsh
Rocha and Goulden, 2010	Drained	WT manipulation	Mediterranean																																										Rocha et al. 2010. Drought legacies influence the long-term carbon balance of a freshwater marsh
Rocha and Goulden, 2010	Drained	WT manipulation	Mediterranean																																										Rocha et al. 2010. Drought legacies influence the long-term carbon balance of a freshwater marsh
Rocha and Goulden, 2010	Drained	WT manipulation	Mediterranean																																										Rocha et al. 2010. Drought legacies influence the long-term carbon balance of a freshwater marsh
Pohl et al. 2015	Drained	Agriculture	Temperate																																										Pohl et al. 2015. Dynamic C and N stocks – key factors controlling the C gas exchange of maize in heterogenous peatland
Pohl et al. 2015	Drained	Agriculture	Temperate																																										Pohl et al. 2015. Dynamic C and N stocks – key factors controlling the C gas exchange of maize in heterogenous peatland
Pohl et al. 2015	Drained	Agriculture	Temperate																																										Pohl et al. 2015. Dynamic C and N stocks – key factors controlling the C gas exchange of maize in heterogenous peatland
Pohl et al. 2015	Drained	Agriculture	Temperate																																										Pohl et al. 2015. Dynamic C and N stocks – key factors controlling the C gas exchange of maize in heterogenous peatland
Pohl et al. 2015	Drained	Agriculture	Temperate																																										Pohl et al. 2015. Dynamic C and N stocks – key factors controlling the C gas exchange of maize in heterogenous peatland
Pohl et al. 2015	Drained	Agriculture	Temperate																																										Pohl et al. 2015. Dynamic C and N stocks – key factors controlling the C gas exchange of maize in heterogenous peatland
Pohl et al. 2015	Drained	Agriculture	Temperate																																										Pohl et al. 2015. Dynamic C and N stocks – key factors controlling the C gas exchange of maize in heterogenous peatland
Pohl et al. 2015	Drained	Agriculture	Temperate																																										Pohl et al. 2015. Dynamic C and N stocks – key factors controlling the C gas exchange of maize in heterogenous peatland
Pohl et al. 2015	Drained	Agriculture	Temperate																																										Pohl et al. 2015. Dynamic C and N stocks – key factors controlling the C gas exchange of maize in heterogenous peatland
Pohl et al. 2015	Drained	Agriculture	Temperate																																										Pohl et al. 2015. Dynamic C and N stocks – key factors controlling the C gas exchange of maize in heterogenous peatland
Pohl et al. 2015	Drained	Agriculture	Temperate																																										Pohl et al. 2015. Dynamic C and N stocks – key factors controlling the C gas exchange of maize in heterogenous peatland
Pohl et al. 2015	Drained	Agriculture	Temperate																																										Pohl et al. 2015. Dynamic C and N stocks – key factors controlling the C gas exchange of maize in heterogenous peatland
Nagata et al. 2005	Drained	Agriculture	Temperate																																										Nagata et al. 2005. Effect of Sasa invasion on global warming potential in Sphagnum dominated poor fen in Bibai
Nagata et al. 2005	Drained	Agriculture	Temperate																																										Nagata et al. 2005. Effect of Sasa invasion on global warming potential in Sphagnum dominated poor fen in Bibai
Nagata et al. 2005	Drained	Agriculture	Temperate																																										Nagata et al. 2005. Effect of Sasa invasion on global warming potential in Sphagnum dominated poor fen in Bibai
Valde´s-Barrera et al. 2019	Drained	Peat extraction and grazing																																											Valde´s-Barrera et al. 2020. Effects of disturbance on the carbon dioxide balance of an anthropogenic peatland in northern Patagonia
Hirano et al. 2012	Drained	Forestry	Tropical																																										Hirano et al. 2012. Effects of disturbances on the carbon balance of tropical peat swamp forests
Hirano et al. 2012	Drained	Forestry	Tropical																																										Hirano et al. 2012. Effects of disturbances on the carbon balance of tropical peat swamp forests
Hirano et al. 2012	Drained	Forestry	Tropical																																										Hirano et al. 2012. Effects of disturbances on the carbon balance of tropical peat swamp forests
Hirano et al. 2012	Drained	Forestry	Tropical																																										Hirano et al. 2012. Effects of disturbances on the carbon balance of tropical peat swamp forests
Hirano et al. 2012	Drained	Forestry	Tropical																																										Hirano et al. 2012. Effects of disturbances on the carbon balance of tropical peat swamp forests
Hirano et al. 2012	Drained	Forestry	Tropical																																										Hirano et al. 2012. Effects of disturbances on the carbon balance of tropical peat swamp forests
Hirano et al. 2012	Drained	Forestry and burning	Tropical																																										Hirano et al. 2012. Effects of disturbances on the carbon balance of tropical peat swamp forests
Hirano et al. 2012	Drained	Forestry and burning	Tropical																																										Hirano et al. 2012. Effects of disturbances on the carbon balance of tropical peat swamp forests
Hirano et al. 2012	Drained	Forestry and burning	Tropical																																										Hirano et al. 2012. Effects of disturbances on the carbon balance of tropical peat swamp forests
Hirano et al. 2012	Drained	Forestry and burning	Tropical																																										Hirano et al. 2012. Effects of disturbances on the carbon balance of tropical peat swamp forests
Hirano et al. 2012	Drained	Forestry and burning	Tropical																																										Hirano et al. 2012. Effects of disturbances on the carbon balance of tropical peat swamp forests
Beetz et al. 2013	Drained	Grassland	Temperate	kg CO2 ha-1 yr-1	-8286.67		3	kg CO2 ha-1 yr-1	11623.3		3																																		Beetz et al. 2013. Effects of land use intensity on the full greenhouse gas balance in an Atlantic peat bog
Beetz et al. 2013	Drained	Grassland	Temperate	kg CO2 ha-1 yr-1	-6636.67		3	kg CO2 ha-1 yr-1	18883.3		3																																		Beetz et al. 2013. Effects of land use intensity on the full greenhouse gas balance in an Atlantic peat bog
Järveoja et al. 2016	Drained	Peat extraction, agriculture	Temperate					kg CO2 ha-1 yr-1	4216.67		3	42	154		3						13200		3		61		3		40		3														Jarveoja et al. 2016. Full carbon and greenhouse gas balances of fertilized and nonfertilized reed canary grass cultivations on an abandoned peat extraction area in a dry year
Järveoja et al. 2016	Drained	Peat extraction, agriculture	Temperate					kg CO2 ha-1 yr-1	733.333		3	42	154		3						15216.7		3		55		3		70		3														Jarveoja et al. 2016. Full carbon and greenhouse gas balances of fertilized and nonfertilized reed canary grass cultivations on an abandoned peat extraction area in a dry year
Järveoja et al. 2016	Drained	Peat extraction, bare peat, abandoned	Temperate								3	41	150.333		3						10926.7		3		29		3		170		3														Jarveoja et al. 2016. Full carbon and greenhouse gas balances of fertilized and nonfertilized reed canary grass cultivations on an abandoned peat extraction area in a dry year
Karki et al. 2015	Drained	Agriculture	Temperate					kg CO2 ha-1 yr-1	17233.3	733.333	3																																		Karki et al. 2015. Full GHG balance of a drained fen peatland cropped to spring barley and reed canary grass using comparative assessment of CO2 fluxes
Karki et al. 2015	Drained	Agriculture	Temperate					kg CO2 ha-1 yr-1	19800	733.333	3																																		Karki et al. 2015. Full GHG balance of a drained fen peatland cropped to spring barley and reed canary grass using comparative assessment of CO2 fluxes
Korkiakoski et al. 2019	Drained	Forestry and clear-cut	Boreal																																										Korkiakoski et al. 2019. Greenhouse gas and energy fluxes in a boreal peatland forest after clear-cutting
Korkiakoski et al. 2019	Drained	Forestry and clear-cut	Boreal																																										Korkiakoski et al. 2019. Greenhouse gas and energy fluxes in a boreal peatland forest after clear-cutting
Poyda et al. 2016	Drained	Agriculture	Temperate																																										Poyda et al. 2016. Greenhouse gas emissions from fen soils used for forage production in northern Germany
Poyda et al. 2016	Drained	Agriculture	Temperate					kg CO2 ha-1 yr-1	17966.7	2200	3																																		Poyda et al. 2016. Greenhouse gas emissions from fen soils used for forage production in northern Germany
Poyda et al. 2016	Drained	Agriculture	Temperate					kg CO2 ha-1 yr-1	13566.7	733.333	3																																		Poyda et al. 2016. Greenhouse gas emissions from fen soils used for forage production in northern Germany
Poyda et al. 2016	Drained	Agriculture	Temperate																																										Poyda et al. 2016. Greenhouse gas emissions from fen soils used for forage production in northern Germany
Poyda et al. 2016	Drained	Agriculture	Temperate					kg CO2 ha-1 yr-1	21633.3	733.333	3																																		Poyda et al. 2016. Greenhouse gas emissions from fen soils used for forage production in northern Germany
Poyda et al. 2016	Drained	Agriculture	Temperate					kg CO2 ha-1 yr-1	16500	733.333	3																																		Poyda et al. 2016. Greenhouse gas emissions from fen soils used for forage production in northern Germany
Poyda et al. 2016	Drained	Agriculture	Temperate																																										Poyda et al. 2016. Greenhouse gas emissions from fen soils used for forage production in northern Germany
Poyda et al. 2016	Drained	Agriculture	Temperate					kg CO2 ha-1 yr-1	13566.7	733.333	3																																		Poyda et al. 2016. Greenhouse gas emissions from fen soils used for forage production in northern Germany
Poyda et al. 2016	Drained	Agriculture	Temperate					kg CO2 ha-1 yr-1	23833.3	2566.67	3																																		Poyda et al. 2016. Greenhouse gas emissions from fen soils used for forage production in northern Germany
Järveoja et al. 2016	Drained	Peat extraction, bare peat, abandoned	Temperate																																										Järveoja et al. 2016. Impact of water table level on annual carbon and greenhouse gas balances of a restored peat extraction area
Billett et al. 2004	Drained	Grassland	Temperate									309	1133	858	3		51.3333	40.3333	3		168.667				1858.67				378.257	134.028															Billett et al. 2004. Linking land-atmosphere-stream carbon fluxes in a lowland peatland system
Billett et al. 2004	Drained	Grassland	Temperate									257	942.333	227.333	3		36.6667	7.33333	3																										Billett et al. 2004. Linking land-atmosphere-stream carbon fluxes in a lowland peatland system
Aguilos et al. 2020	Drained	Agriculture	Temperate																																										Aguilos et al. 2020. Long-term carbon flux and balance in managed and natural coastal forested wetlands of the Southeastern USA
Aguilos et al. 2020	Drained	Agriculture	Temperate																																										Aguilos et al. 2020. Long-term carbon flux and balance in managed and natural coastal forested wetlands of the Southeastern USA
Aguilos et al. 2020	Drained	Agriculture	Temperate																																										Aguilos et al. 2020. Long-term carbon flux and balance in managed and natural coastal forested wetlands of the Southeastern USA
Aguilos et al. 2020	Drained	Agriculture	Temperate																																										Aguilos et al. 2020. Long-term carbon flux and balance in managed and natural coastal forested wetlands of the Southeastern USA
Aguilos et al. 2020	Drained	Agriculture	Temperate																																										Aguilos et al. 2020. Long-term carbon flux and balance in managed and natural coastal forested wetlands of the Southeastern USA
Aguilos et al. 2020	Drained	Agriculture	Temperate																																										Aguilos et al. 2020. Long-term carbon flux and balance in managed and natural coastal forested wetlands of the Southeastern USA
Aguilos et al. 2020	Drained	Agriculture	Temperate																																										Aguilos et al. 2020. Long-term carbon flux and balance in managed and natural coastal forested wetlands of the Southeastern USA
Aguilos et al. 2020	Drained	Agriculture	Temperate																																										Aguilos et al. 2020. Long-term carbon flux and balance in managed and natural coastal forested wetlands of the Southeastern USA
Aguilos et al. 2020	Drained	Agriculture	Temperate																																										Aguilos et al. 2020. Long-term carbon flux and balance in managed and natural coastal forested wetlands of the Southeastern USA
Aguilos et al. 2020	Drained	Agriculture	Temperate																																										Aguilos et al. 2020. Long-term carbon flux and balance in managed and natural coastal forested wetlands of the Southeastern USA
Aguilos et al. 2020	Drained	Agriculture	Temperate																																										Aguilos et al. 2020. Long-term carbon flux and balance in managed and natural coastal forested wetlands of the Southeastern USA
Aguilos et al. 2020	Drained	Agriculture	Temperate																																										Aguilos et al. 2020. Long-term carbon flux and balance in managed and natural coastal forested wetlands of the Southeastern USA
Aguilos et al. 2020	Drained	Agriculture	Temperate																																										Aguilos et al. 2020. Long-term carbon flux and balance in managed and natural coastal forested wetlands of the Southeastern USA
Aguilos et al. 2020	Drained	Agriculture	Temperate																																										Aguilos et al. 2020. Long-term carbon flux and balance in managed and natural coastal forested wetlands of the Southeastern USA
Aguilos et al. 2020	Drained	Agriculture	Temperate																																										Aguilos et al. 2020. Long-term carbon flux and balance in managed and natural coastal forested wetlands of the Southeastern USA
Aguilos et al. 2020	Drained	Agriculture	Temperate																																										Aguilos et al. 2020. Long-term carbon flux and balance in managed and natural coastal forested wetlands of the Southeastern USA
Aguilos et al. 2020	Drained	Agriculture	Temperate																																										Aguilos et al. 2020. Long-term carbon flux and balance in managed and natural coastal forested wetlands of the Southeastern USA
Aguilos et al. 2020	Drained	Agriculture	Temperate																																										Aguilos et al. 2020. Long-term carbon flux and balance in managed and natural coastal forested wetlands of the Southeastern USA
Aguilos et al. 2020	Drained	Agriculture	Temperate																																										Aguilos et al. 2020. Long-term carbon flux and balance in managed and natural coastal forested wetlands of the Southeastern USA
Aguilos et al. 2020	Drained	Agriculture	Temperate																																										Aguilos et al. 2020. Long-term carbon flux and balance in managed and natural coastal forested wetlands of the Southeastern USA
Aguilos et al. 2020	Drained	Agriculture	Temperate																																										Aguilos et al. 2020. Long-term carbon flux and balance in managed and natural coastal forested wetlands of the Southeastern USA
Aguilos et al. 2020	Drained	Agriculture	Temperate																																										Aguilos et al. 2020. Long-term carbon flux and balance in managed and natural coastal forested wetlands of the Southeastern USA
Aguilos et al. 2020	Drained	Agriculture	Temperate																																										Aguilos et al. 2020. Long-term carbon flux and balance in managed and natural coastal forested wetlands of the Southeastern USA
Aguilos et al. 2020	Drained	Agriculture	Temperate																																										Aguilos et al. 2020. Long-term carbon flux and balance in managed and natural coastal forested wetlands of the Southeastern USA
Aguilos et al. 2020	Drained	Agriculture	Temperate																																										Aguilos et al. 2020. Long-term carbon flux and balance in managed and natural coastal forested wetlands of the Southeastern USA
Kandel et al. 2013	Drained	Agriculture	Temperate																																										Kandel et al. 2013. Measurement and modelling of CO2 flux from a drained fen peatland cultivated with reed canary grass and spring barley
Kandel et al. 2013	Drained	Agriculture	Temperate																																										Kandel et al. 2013. Measurement and modelling of CO2 flux from a drained fen peatland cultivated with reed canary grass and spring barley
Wilson et al. 2016	Drained	Peat extraction, bare peat	Temperate									310.909	1140												920																				Wilson et al. 2016. Multiyear greenhouse gas balances at a rewetted temperate peatland
Wilson et al. 2016	Drained	Peat extraction, bare peat	Temperate									310.909	1140												920																				Wilson et al. 2016. Multiyear greenhouse gas balances at a rewetted temperate peatland
Wilson et al. 2016	Drained	Peat extraction	Temperate									310.909	1140												920																				Wilson et al. 2016. Multiyear greenhouse gas balances at a rewetted temperate peatland
Wilson et al. 2016	Drained	Peat extraction	Temperate									310.909	1140												920																				Wilson et al. 2016. Multiyear greenhouse gas balances at a rewetted temperate peatland
Beyer et al. 2015	Drained	Agriculture	Temperate	kg CO2 ha-1 yr-1	-2346.67			kg CO2 ha-1 yr-1	7516.67	2860																																			Beyer et al. 2015. Multiyear greenhouse gas flux measurements on a temperate fen soil used for cropland or grassland
Beyer et al. 2015	Drained	Agriculture	Temperate	kg CO2 ha-1 yr-1	-2823.33			kg CO2 ha-1 yr-1	10156.7	1100																																			Beyer et al. 2015. Multiyear greenhouse gas flux measurements on a temperate fen soil used for cropland or grassland
Beyer et al. 2015	Drained	Agriculture	Temperate	kg CO2 ha-1 yr-1	-2566.67			kg CO2 ha-1 yr-1	13053.3	2823.33																																			Beyer et al. 2015. Multiyear greenhouse gas flux measurements on a temperate fen soil used for cropland or grassland
Beyer et al. 2015	Drained	Agriculture	Temperate	kg CO2 ha-1 yr-1	-2566.67			kg CO2 ha-1 yr-1	8800	513.333																																			Beyer et al. 2015. Multiyear greenhouse gas flux measurements on a temperate fen soil used for cropland or grassland
Beyer et al. 2015	Drained	Agriculture	Temperate																																										Beyer et al. 2015. Multiyear greenhouse gas flux measurements on a temperate fen soil used for cropland or grassland
Beyer et al. 2015	Drained	Agriculture	Temperate					kg CO2 ha-1 yr-1	11550	762.984																																			Beyer et al. 2015. Multiyear greenhouse gas flux measurements on a temperate fen soil used for cropland or grassland
Beyer et al. 2015	Drained	Agriculture	Temperate					kg CO2 ha-1 yr-1	10926.7	657.96																																			Beyer et al. 2015. Multiyear greenhouse gas flux measurements on a temperate fen soil used for cropland or grassland
Beyer et al. 2015	Drained	Agriculture	Temperate					kg CO2 ha-1 yr-1	8396.67	466.69																																			Beyer et al. 2015. Multiyear greenhouse gas flux measurements on a temperate fen soil used for cropland or grassland
Hurkuck et al. 2016	Drained	Agriculture	Temperate																																										Hurkuck et al. 2016. Near-neutral carbon dioxide balance at a seminatural, temperate bog ecosystem
Hurkuck et al. 2016	Drained	Agriculture	Temperate																																										Hurkuck et al. 2016. Near-neutral carbon dioxide balance at a seminatural, temperate bog ecosystem
Hurkuck et al. 2016	Drained	Agriculture	Temperate																																										Hurkuck et al. 2016. Near-neutral carbon dioxide balance at a seminatural, temperate bog ecosystem
Evrendilek, 2013	Drained	Grassland	Temperate																																										Evrendilek, 2013. Quantifying biosphere–atmosphere exchange of CO2 using eddy covariance, wavelet denoising, neural networks, and multiple regression models
Ratcliffe et al. 2019a	Drained	Grassland	Temperate																																										Ratcliffe et al. 2019a. Recovery of the CO2 sink in a remnant peatland following water table lowering
Ratcliffe et al. 2019a	Drained	Grassland	Temperate																																										Ratcliffe et al. 2019a. Recovery of the CO2 sink in a remnant peatland following water table lowering
Ratcliffe et al. 2019a	Drained	Grassland	Temperate																																										Ratcliffe et al. 2019a. Recovery of the CO2 sink in a remnant peatland following water table lowering
Ratcliffe et al. 2019a	Drained	Grassland	Temperate																																										Ratcliffe et al. 2019a. Recovery of the CO2 sink in a remnant peatland following water table lowering
Renou-Wilson et al. 2018	Drained	Peat extraction, bare peat	Temperate																																										Renou-Wilson et al. 2018. Rewetting degraded peatlands for climate and biodiversity benefits Results from two raised bogs
Renou-Wilson et al. 2018	Drained	Peat extraction, bare peat	Temperate																																										Renou-Wilson et al. 2018. Rewetting degraded peatlands for climate and biodiversity benefits Results from two raised bogs
Renou-Wilson et al. 2018	Drained	Peat extraction, bare peat	Temperate																																										Renou-Wilson et al. 2018. Rewetting degraded peatlands for climate and biodiversity benefits Results from two raised bogs
Renou-Wilson et al. 2018	Drained	Peat extraction, bare peat	Temperate																																										Renou-Wilson et al. 2018. Rewetting degraded peatlands for climate and biodiversity benefits Results from two raised bogs
Renou-Wilson et al. 2018	Drained	Peat extraction, bare peat	Temperate																																										Renou-Wilson et al. 2018. Rewetting degraded peatlands for climate and biodiversity benefits Results from two raised bogs
Renou-Wilson et al. 2018	Drained	Peat extraction, bare peat	Temperate																																										Renou-Wilson et al. 2018. Rewetting degraded peatlands for climate and biodiversity benefits Results from two raised bogs
Dinsmore et al. 2010	Drained	Grassland	Temperate									186	682	586.667	1		38.8667	11.3667	1		423	114	1		6.4	1.5	1		10.2	5.1	1														Dinsmore et al. 2010. Role of the aquatic pathway in the carbon and greenhouse gas budgets of a peatland catchment
Dinsmore et al. 2010	Drained	Grassland	Temperate									322	1180.67	685.667	1		14.3	7.7	1		509	186	1		6.6	1.8	1		18.8	1.6	1														Dinsmore et al. 2010. Role of the aquatic pathway in the carbon and greenhouse gas budgets of a peatland catchment
Zhu et al. 2020	Drained	Grassland	Temperate																																										Zhu et al. 2020. Seasonal and Interannual Variations of CO2 Fluxes Over 10 Years in an Alpine Wetland on the Qinghai-Tibetan Plateau
Zhu et al. 2020	Drained	Grassland	Temperate																																										Zhu et al. 2020. Seasonal and Interannual Variations of CO2 Fluxes Over 10 Years in an Alpine Wetland on the Qinghai-Tibetan Plateau
Zhu et al. 2020	Drained	Grassland	Temperate																																										Zhu et al. 2020. Seasonal and Interannual Variations of CO2 Fluxes Over 10 Years in an Alpine Wetland on the Qinghai-Tibetan Plateau
Zhu et al. 2020	Drained	Grassland	Temperate																																										Zhu et al. 2020. Seasonal and Interannual Variations of CO2 Fluxes Over 10 Years in an Alpine Wetland on the Qinghai-Tibetan Plateau
Zhu et al. 2020	Drained	Grassland	Temperate																																										Zhu et al. 2020. Seasonal and Interannual Variations of CO2 Fluxes Over 10 Years in an Alpine Wetland on the Qinghai-Tibetan Plateau
Zhu et al. 2020	Drained	Grassland	Temperate																																										Zhu et al. 2020. Seasonal and Interannual Variations of CO2 Fluxes Over 10 Years in an Alpine Wetland on the Qinghai-Tibetan Plateau
Zhu et al. 2020	Drained	Grassland	Temperate																																										Zhu et al. 2020. Seasonal and Interannual Variations of CO2 Fluxes Over 10 Years in an Alpine Wetland on the Qinghai-Tibetan Plateau
Zhu et al. 2020	Drained	Grassland	Temperate																																										Zhu et al. 2020. Seasonal and Interannual Variations of CO2 Fluxes Over 10 Years in an Alpine Wetland on the Qinghai-Tibetan Plateau
Zhu et al. 2020	Drained	Grassland	Temperate																																										Zhu et al. 2020. Seasonal and Interannual Variations of CO2 Fluxes Over 10 Years in an Alpine Wetland on the Qinghai-Tibetan Plateau
Zhu et al. 2020	Drained	Grassland	Temperate																																										Zhu et al. 2020. Seasonal and Interannual Variations of CO2 Fluxes Over 10 Years in an Alpine Wetland on the Qinghai-Tibetan Plateau
Webb et al. 2018	Drained	Agriculture	Subtropical					kg CO2 ha-1 yr-1	57750	3116.67	4	4830	17710	7406.67	1						18663.3	9350	1		775.2	380.8	1																		Webb et al. 2018. Terrestrial versus aquatic carbon fluxes in a subtropical agricultural floodplain over an annual cycle
Huth et al. 2018	Drained	Grassland	Temperate					kg CO2 ha-1 yr-1	6086.67	403.333	3																																		Huth et al. 2018. The climate warming effect of a fen peat meadow with fluctuating water table is reduced by young alder trees
Rowson et al. 2010	Drained		Temperate																																										Rowson et al. 2010. The complete carbon budget of a drained peat catchment
Eickenscheidt et al. 2015	Drained	Agriculture	Temperate					kg CO2 ha-1 yr-1	7076.67																																				Eickenscheidt et al. 2015. The greenhouse gas balance of a drained fen peatland is mainly controlled by land-use rather than soil organic carbon content
Eickenscheidt et al. 2015	Drained	Agriculture	Temperate					kg CO2 ha-1 yr-1	2713.33																																				Eickenscheidt et al. 2015. The greenhouse gas balance of a drained fen peatland is mainly controlled by land-use rather than soil organic carbon content
Eickenscheidt et al. 2015	Drained	Agriculture	Temperate					kg CO2 ha-1 yr-1	2126.67																																				Eickenscheidt et al. 2015. The greenhouse gas balance of a drained fen peatland is mainly controlled by land-use rather than soil organic carbon content
Eickenscheidt et al. 2015	Drained	Agriculture	Temperate					kg CO2 ha-1 yr-1	4950																																				Eickenscheidt et al. 2015. The greenhouse gas balance of a drained fen peatland is mainly controlled by land-use rather than soil organic carbon content
Eickenscheidt et al. 2015	Drained	Agriculture	Temperate					kg CO2 ha-1 yr-1	8323.33																																				Eickenscheidt et al. 2015. The greenhouse gas balance of a drained fen peatland is mainly controlled by land-use rather than soil organic carbon content
Eickenscheidt et al. 2015	Drained	Agriculture	Temperate					kg CO2 ha-1 yr-1	16756.7																																				Eickenscheidt et al. 2015. The greenhouse gas balance of a drained fen peatland is mainly controlled by land-use rather than soil organic carbon content
Eickenscheidt et al. 2015	Drained	Agriculture	Temperate					kg CO2 ha-1 yr-1	5316.67																																				Eickenscheidt et al. 2015. The greenhouse gas balance of a drained fen peatland is mainly controlled by land-use rather than soil organic carbon content
Eickenscheidt et al. 2015	Drained	Agriculture	Temperate					kg CO2 ha-1 yr-1	12100																																				Eickenscheidt et al. 2015. The greenhouse gas balance of a drained fen peatland is mainly controlled by land-use rather than soil organic carbon content
Eickenscheidt et al. 2015	Drained	Grassland	Temperate	kg CO2 ha-1 yr-1	-4620			kg CO2 ha-1 yr-1	10890																																				Eickenscheidt et al. 2015. The greenhouse gas balance of a drained fen peatland is mainly controlled by land-use rather than soil organic carbon content
Eickenscheidt et al. 2015	Drained	Grassland	Temperate	kg CO2 ha-1 yr-1	-9790			kg CO2 ha-1 yr-1	12613.3																																				Eickenscheidt et al. 2015. The greenhouse gas balance of a drained fen peatland is mainly controlled by land-use rather than soil organic carbon content
Eickenscheidt et al. 2015	Drained	Grassland	Temperate	kg CO2 ha-1 yr-1	-4620			kg CO2 ha-1 yr-1	11916.7																																				Eickenscheidt et al. 2015. The greenhouse gas balance of a drained fen peatland is mainly controlled by land-use rather than soil organic carbon content
Eickenscheidt et al. 2015	Drained	Grassland	Temperate	kg CO2 ha-1 yr-1	-9790			kg CO2 ha-1 yr-1	16683.3																																				Eickenscheidt et al. 2015. The greenhouse gas balance of a drained fen peatland is mainly controlled by land-use rather than soil organic carbon content
Eickenscheidt et al. 2015	Drained	Grassland	Temperate	kg CO2 ha-1 yr-1	-2786.67			kg CO2 ha-1 yr-1	12540																																				Eickenscheidt et al. 2015. The greenhouse gas balance of a drained fen peatland is mainly controlled by land-use rather than soil organic carbon content
Eickenscheidt et al. 2015	Drained	Grassland	Temperate	kg CO2 ha-1 yr-1	-1943.33			kg CO2 ha-1 yr-1	19910																																				Eickenscheidt et al. 2015. The greenhouse gas balance of a drained fen peatland is mainly controlled by land-use rather than soil organic carbon content
Eickenscheidt et al. 2015	Drained	Grassland	Temperate	kg CO2 ha-1 yr-1	-2786.67			kg CO2 ha-1 yr-1	13933.3																																				Eickenscheidt et al. 2015. The greenhouse gas balance of a drained fen peatland is mainly controlled by land-use rather than soil organic carbon content
Eickenscheidt et al. 2015	Drained	Grassland	Temperate	kg CO2 ha-1 yr-1	-1943.33			kg CO2 ha-1 yr-1	21743.3																																				Eickenscheidt et al. 2015. The greenhouse gas balance of a drained fen peatland is mainly controlled by land-use rather than soil organic carbon content
Renou-Wilson et al. 2016	Drained	Grassland	Temperate					kg CO2 ha-1 yr-1	6380		3																						1632												Renou-Wilson et al. 2016. To graze or not to graze Four years greenhouse gas balances and vegetation composition from a drained and a rewetted organic soil under grassland
Renou-Wilson et al. 2016	Drained	Grassland	Temperate					kg CO2 ha-1 yr-1	5023.33		3																						1632												Renou-Wilson et al. 2016. To graze or not to graze Four years greenhouse gas balances and vegetation composition from a drained and a rewetted organic soil under grassland
Renou-Wilson et al. 2016	Drained	Grassland	Temperate																																										Renou-Wilson et al. 2016. To graze or not to graze Four years greenhouse gas balances and vegetation composition from a drained and a rewetted organic soil under grassland
Renou-Wilson et al. 2016	Drained	Grassland	Temperate																																										Renou-Wilson et al. 2016. To graze or not to graze Four years greenhouse gas balances and vegetation composition from a drained and a rewetted organic soil under grassland
Serrano-Ortiz et al. 2020	Drained	Peat extraction, bare peat, abandoned	Mediterranean																																										Serrano-Ortiz et al. 2020. Transition Period Between Vegetation Growth and Senescence Controlling Interannual Variability of C Fluxes in a Mediterranean Reed Wetland
Serrano-Ortiz et al. 2020	Drained	Peat extraction, bare peat, abandoned	Mediterranean																																										Serrano-Ortiz et al. 2020. Transition Period Between Vegetation Growth and Senescence Controlling Interannual Variability of C Fluxes in a Mediterranean Reed Wetland
Serrano-Ortiz et al. 2020	Drained	Peat extraction, bare peat, abandoned	Mediterranean																																										Serrano-Ortiz et al. 2020. Transition Period Between Vegetation Growth and Senescence Controlling Interannual Variability of C Fluxes in a Mediterranean Reed Wetland
Serrano-Ortiz et al. 2020	Drained	Peat extraction, bare peat, abandoned	Mediterranean																																										Serrano-Ortiz et al. 2020. Transition Period Between Vegetation Growth and Senescence Controlling Interannual Variability of C Fluxes in a Mediterranean Reed Wetland
Serrano-Ortiz et al. 2020	Drained	Peat extraction, bare peat, abandoned	Mediterranean																																										Serrano-Ortiz et al. 2020. Transition Period Between Vegetation Growth and Senescence Controlling Interannual Variability of C Fluxes in a Mediterranean Reed Wetland
Campbell et al. 2015	Drained	Grassland	Temperate																														13690.7												Campbell et al. 2015. Variations in CO2 exchange for dairy farms with year-round rotational grazing on drained peatlands
Yang et al. 2013	Drained	Agriculture	Temperate																																										Yang et al. 2013. Effects of reclamation on net ecosystem CO2 exchange in wetland in the Yellow River Delta, China
IPCC 2014	Deep-drained	Grassland	Temperate																						19720											21									IPCC 2014
IPCC 2014	Deep-drained	Grassland	Temperate																						26837.3											25									IPCC 2014
IPCC 2014	Deep-drained	Grassland	Temperate																						3264											6									IPCC 2014
IPCC 2014	Deep-drained	Grassland	Temperate																						26293.3											4									IPCC 2014
IPCC 2014	Deep-drained	Grassland	Temperate																						20400											4									IPCC 2014
IPCC 2014	Deep-drained	Grassland	Temperate																						90168											4									IPCC 2014
IPCC 2014	Deep-drained	Grassland	Temperate																						77248											5									IPCC 2014
IPCC 2014	Shallow-drained	Grassland	Temperate																						26837.3											25									IPCC 2014
IPCC 2014	Shallow-drained	Grassland	Temperate																						15640											6									IPCC 2014
IPCC 2014	Shallow-drained	Grassland	Temperate																						3853.33											25									IPCC 2014
IPCC 2014	Shallow-drained	Grassland	Temperate																						17000											10									IPCC 2014
IPCC 2014	Drained	Forestry	Temperate																						5168											3									IPCC 2014
IPCC 2014	Drained	Forestry	Boreal																						35496											3									IPCC 2014
IPCC 2014	Drained	Forestry	Boreal																						6301.33											2									IPCC 2014
IPCC 2014	Drained	Forestry	Boreal																						3989.33											4									IPCC 2014
IPCC 2014	Drained	Forestry	Temperate																						1269.33											3									IPCC 2014
IPCC 2014	Drained	Forestry	Boreal																						13645.3											1									IPCC 2014
IPCC 2014	Drained	Forestry	Boreal																						498.667											1									IPCC 2014
IPCC 2014	Drained	Forestry	Temperate																						8704											3									IPCC 2014
IPCC 2014	Drained	Forestry	Temperate																						589.333											2									IPCC 2014
IPCC 2014	Drained	Forestry	Boreal																						2402.67											3									IPCC 2014
IPCC 2014	Drained	Peat extraction	Boreal																						6029.33											2									IPCC 2014
IPCC 2014	Drained	Peat extraction	Temperate																						16138.7											3									IPCC 2014
IPCC 2014	Drained	Peat extraction	Boreal																						46330.7											4									IPCC 2014
IPCC 2014	Drained	Peat extraction	Boreal																						36130.7											4									IPCC 2014
IPCC 2014	Drained	Peat extraction, bare peat, abandoned	Boreal																						498.667											6									IPCC 2014
IPCC 2014	Drained	Peat extraction, bare peat, abandoned	Temperate																						4986.67											5									IPCC 2014
IPCC 2014	Drained	Peat extraction	Temperate																						3173.33											3									IPCC 2014
IPCC 2014	Drained	Agriculture, abandoned	Tropical																						20354.7											2									IPCC 2014
IPCC 2014	Drained	Agriculture	Tropical																						133235											2									IPCC 2014
Paul et al. 2018	Drained	Agriculture	Temperate									310.909	1140												1460											5									Paul et al. 2018. Assessing the role of artificially drained agricultural land for climate change mitigation in Ireland
Paul et al. 2018	Drained	Agriculture	Temperate									310.909	1140												1460											5									Paul et al. 2018. Assessing the role of artificially drained agricultural land for climate change mitigation in Ireland
Paul et al. 2018	Shallow-drained	Grassland	Temperate									310.909	1140												660											5									Paul et al. 2018. Assessing the role of artificially drained agricultural land for climate change mitigation in Ireland
Paul et al. 2018	Deep-drained	Grassland	Temperate									310.909	1140												1460											5									Paul et al. 2018. Assessing the role of artificially drained agricultural land for climate change mitigation in Ireland
Paul et al. 2018	Shallow-drained	Grassland	Temperate									310.909	1140												660											5									Paul et al. 2018. Assessing the role of artificially drained agricultural land for climate change mitigation in Ireland
Paul et al. 2018	Deep-drained	Grassland	Temperate									310.909	1140												1460											5									Paul et al. 2018. Assessing the role of artificially drained agricultural land for climate change mitigation in Ireland
Von Arnold et al. 2005	Drained	Forestry	Temperate																		14454		2		1370.06		2		261.048		2					1									Von Arnold et al. 2005. Fluxes of CO2, CH4 and N2O from drained coniferous forests on organic soils
Von Arnold et al. 2005	Drained	Forestry	Temperate																		12264		2		1072.22		2		130.524		2					1									Von Arnold et al. 2005. Fluxes of CO2, CH4 and N3O from drained coniferous forests on organic soils
Nykanen et al. 1995	Drained	Grassland	Temperate																														5950		1										Nykanen et al. 1995. Emissions of CH4, N20 and CO2 from a virgin fen and a fen drained for grassland in Finland
Hergoualc’h and Verchot, 2014	Drainage	Forestry	Tropical									900	3300																																Hergoualc’h and Verchot, 2014. Greenhouse gas emission factors for land use and land-use change in Southeast Asian peatlands
Hergoualc’h and Verchot, 2014	Drainage	Agriculture	Tropical									900	3300																																Hergoualc’h and Verchot, 2014. Greenhouse gas emission factors for land use and land-use change in Southeast Asian peatlands
Hergoualc’h and Verchot, 2014	Drainage	Agriculture	Tropical									900	3300																																Hergoualc’h and Verchot, 2014. Greenhouse gas emission factors for land use and land-use change in Southeast Asian peatlands
Hergoualc’h and Verchot, 2014	Drainage	Agriculture	Tropical									900	3300																																Hergoualc’h and Verchot, 2014. Greenhouse gas emission factors for land use and land-use change in Southeast Asian peatlands
Hergoualc’h and Verchot, 2015	Drainage	Agriculture	Tropical									900	3300																																Hergoualc’h and Verchot, 2014. Greenhouse gas emission factors for land use and land-use change in Southeast Asian peatlands
Koskinene et al. 2016	Drainage	Forestry	Boreal																						9410.5	2946.13										3									Koskinene et al. 2016. High methane emissions from restored Norway spruce swamps in southern Finland over one growing season
Dommain et al. 2018	Drainage	Agriculture	Tropical																						108800											3.7									Dommain et al. 2018. A radiative forcing analysis of tropical peatlands before and after their conversion to agricultural plantations
Dommain et al. 2018	Drainage	Agriculture	Tropical																						108800											4.3									Dommain et al. 2018. A radiative forcing analysis of tropical peatlands before and after their conversion to agricultural plantations
Roulet and Moore, 1995	Drainage	Forestry	Boreal																						2494.41																				Roulet and Moore, 1995. The effect of forestry drainage practices on the emission of methane from northern peatlands
Roulet and Moore, 1995	Drainage	Forestry	Boreal																						17349.2																				Roulet and Moore, 1995. The effect of forestry drainage practices on the emission of methane from northern peatlands
Roulet and Moore, 1995	Drainage	Forestry	Boreal																						10287.9																				Roulet and Moore, 1995. The effect of forestry drainage practices on the emission of methane from northern peatlands
Köhn et al. 2021	Drainage	Grassland	Temperate																						37638											1.52									Köhn et al. 2021. Drainage Ditches Contribute Considerably to the CH4 Budget of a Drained and a Rewetted Temperate Fen
Köhn et al. 2021	Drainage	Grassland	Temperate																						41752											1.52									Köhn et al. 2021. Drainage Ditches Contribute Considerably to the CH4 Budget of a Drained and a Rewetted Temperate Fen
Luan and Wu, 2015	Drainage	Grassland	Boreal																						1381.25	514.25	5									5									Luan and Wu, 2015. Long-term agricultural drainage stimulates CH4 emissions from ditches through increased substrate availability in a boreal peatland
Smukler et al. 2010	Drainage	Agriculture	Mediterranean																										435.95																Smukler et al. 2010. Biodiversity and multiple ecosystem functions in an organic farmscape
Zhang et al. 2016	Drainage	Agriculture	Subtropical																										1631.55																Zhang et al. 2016. Effects of vegetation on ammonium removal and nitrous oxideemissions from pilot-scale drainage ditches
Korkiakoski et al. 2020	Drained	Forestry	Temperate																						8202.51	1912.13			339.362	130.524						2.4									Korkiakoski et al. 2020. Impact of partial harvest on CH4 and N2O balances of a drained boreal peatland forest
Korkiakoski et al. 2020	Drained	Forestry	Temperate																						378.257	134.028			1044.19	495.991						2.4									Korkiakoski et al. 2020. Impact of partial harvest on CH4 and N2O balances of a drained boreal peatland forest
Arn The et al. 2011	Drained	Grassland	Mediterranean																		17398.3	2676.67	5		57880.2	9729.44	5		2828.02	978.93	5		11333.3			5									Arn The et al. 2011. Large Greenhouse Gas Emissions from a Temperate Peatland Pasture
Kløve et al. 2010.	Drained	Grassland	Temperate					kg CO2 ha-1 yr-1	14842.7																																				Kløve et al. 2010. Leaching of nutrients and emission of greenhouse gases from peatland cultivation at Bodin, Northern Norway
Kløve et al. 2010.	Drained	Grassland	Temperate					kg CO2 ha-1 yr-1	12906.7																																				Kløve et al. 2010. Leaching of nutrients and emission of greenhouse gases from peatland cultivation at Bodin, Northern Norway
Peacock et al. 2017	Drained	Grassland	Temperate																		11700	3400	3		6222	82960	3									1.7									Peacock et al. 2017. Management effects on greenhouse gas dynamics in fen ditches
Peacock et al. 2017	Drained	Agriculture	Temperate																		14400	3120	3		9248	33082	3									2									Peacock et al. 2017. Management effects on greenhouse gas dynamics in fen ditches
Arina et al. 2010	Drained	Grassland	Temperate																						153		3						5383.46			21									Arina et al. 2010. Methane emissions in two drained peat agro-ecosystems with high and low agricultural intensity
Arina et al. 2010	Drained	Grassland	Temperate																						159.8		3									21									Arina et al. 2010. Methane emissions in two drained peat agro-ecosystems with high and low agricultural intensity
Minkkinen et al. 2020	Drained	Forestry	Boreal																										632.21																Minkkinen et al. 2020. Nitrous oxide emissions of undrained, forestry-drained, and rewetted boreal peatlands
Minkkinen et al. 2020	Drained	Forestry	Boreal																										579.289																Minkkinen et al. 2020. Nitrous oxide emissions of undrained, forestry-drained, and rewetted boreal peatlands
Minkkinen et al. 2020	Drained	Forestry	Boreal																										500.187																Minkkinen et al. 2020. Nitrous oxide emissions of undrained, forestry-drained, and rewetted boreal peatlands
Minkkinen et al. 2020	Drained	Forestry	Boreal																										421.076																Minkkinen et al. 2020. Nitrous oxide emissions of undrained, forestry-drained, and rewetted boreal peatlands
Minkkinen et al. 2020	Drained	Forestry	Boreal																										406.327																Minkkinen et al. 2020. Nitrous oxide emissions of undrained, forestry-drained, and rewetted boreal peatlands
Minkkinen et al. 2020	Drained	Forestry	Boreal																										331.494																Minkkinen et al. 2020. Nitrous oxide emissions of undrained, forestry-drained, and rewetted boreal peatlands
Minkkinen et al. 2020	Drained	Forestry	Boreal																										311.341																Minkkinen et al. 2020. Nitrous oxide emissions of undrained, forestry-drained, and rewetted boreal peatlands
Minkkinen et al. 2020	Drained	Forestry	Boreal																										301.204																Minkkinen et al. 2020. Nitrous oxide emissions of undrained, forestry-drained, and rewetted boreal peatlands
Minkkinen et al. 2020	Drained	Forestry	Boreal																										299.119																Minkkinen et al. 2020. Nitrous oxide emissions of undrained, forestry-drained, and rewetted boreal peatlands
Minkkinen et al. 2020	Drained	Forestry	Boreal																										303.12																Minkkinen et al. 2020. Nitrous oxide emissions of undrained, forestry-drained, and rewetted boreal peatlands
Minkkinen et al. 2020	Drained	Forestry	Boreal																										276.764																Minkkinen et al. 2020. Nitrous oxide emissions of undrained, forestry-drained, and rewetted boreal peatlands
Minkkinen et al. 2020	Drained	Forestry	Boreal																										286.821																Minkkinen et al. 2020. Nitrous oxide emissions of undrained, forestry-drained, and rewetted boreal peatlands
Minkkinen et al. 2020	Drained	Forestry	Boreal																										260.572																Minkkinen et al. 2020. Nitrous oxide emissions of undrained, forestry-drained, and rewetted boreal peatlands
Minkkinen et al. 2020	Drained	Forestry	Boreal																										254.356																Minkkinen et al. 2020. Nitrous oxide emissions of undrained, forestry-drained, and rewetted boreal peatlands
Minkkinen et al. 2020	Drained	Forestry	Boreal																										207.866																Minkkinen et al. 2020. Nitrous oxide emissions of undrained, forestry-drained, and rewetted boreal peatlands
Minkkinen et al. 2020	Drained	Forestry	Boreal																										199.502																Minkkinen et al. 2020. Nitrous oxide emissions of undrained, forestry-drained, and rewetted boreal peatlands
Minkkinen et al. 2020	Drained	Forestry	Boreal																										183.261																Minkkinen et al. 2020. Nitrous oxide emissions of undrained, forestry-drained, and rewetted boreal peatlands
Minkkinen et al. 2020	Drained	Forestry	Boreal																										187.481																Minkkinen et al. 2020. Nitrous oxide emissions of undrained, forestry-drained, and rewetted boreal peatlands
Minkkinen et al. 2020	Drained	Forestry	Boreal																										199.395																Minkkinen et al. 2020. Nitrous oxide emissions of undrained, forestry-drained, and rewetted boreal peatlands
Minkkinen et al. 2020	Drained	Forestry	Boreal																										156.946																Minkkinen et al. 2020. Nitrous oxide emissions of undrained, forestry-drained, and rewetted boreal peatlands
Minkkinen et al. 2020	Drained	Forestry	Boreal																										160.844																Minkkinen et al. 2020. Nitrous oxide emissions of undrained, forestry-drained, and rewetted boreal peatlands
Minkkinen et al. 2020	Drained	Forestry	Boreal																										116.242																Minkkinen et al. 2020. Nitrous oxide emissions of undrained, forestry-drained, and rewetted boreal peatlands
Minkkinen et al. 2020	Drained	Forestry	Boreal																										79.853																Minkkinen et al. 2020. Nitrous oxide emissions of undrained, forestry-drained, and rewetted boreal peatlands
Minkkinen et al. 2020	Drained	Forestry	Boreal																										41.0924																Minkkinen et al. 2020. Nitrous oxide emissions of undrained, forestry-drained, and rewetted boreal peatlands
Minkkinen et al. 2020	Drained	Forestry	Boreal																										36.9886																Minkkinen et al. 2020. Nitrous oxide emissions of undrained, forestry-drained, and rewetted boreal peatlands
Hyvönen et al. 2013	Drained	Peat extraction	Boreal									73.7	270.233								1110	50	2		20.4	17	2		29.8	8.94	2					6									Hyvönen et al. 2013. The role of drainage ditches in greenhouse gas emissions and surface leaching losses from a cutaway peatland cultivated with a perennial bioenergy crop
Hyvönen et al. 2013	Drained	Peat extraction	Boreal									43	157.667								3910	1140	2		-3.4	3.4	2		20.86	17.88	2					6									Hyvönen et al. 2013. The role of drainage ditches in greenhouse gas emissions and surface leaching losses from a cutaway peatland cultivated with a perennial bioenergy crop
Hyvönen et al. 2013	Drained	Peat extraction	Boreal									58.6	214.867								3510	550	2		0	3.4	2		32.78	11.92	2					6									Hyvönen et al. 2013. The role of drainage ditches in greenhouse gas emissions and surface leaching losses from a cutaway peatland cultivated with a perennial bioenergy crop
Hyvönen et al. 2013	Drained	Peat extraction	Boreal									82.1	301.033								8400	1530	2		935	649.4	2		11.92	32.78	2					6									Hyvönen et al. 2013. The role of drainage ditches in greenhouse gas emissions and surface leaching losses from a cutaway peatland cultivated with a perennial bioenergy crop
Hyvönen et al. 2013	Drained	Peat extraction	Boreal									17.3	63.4333								5990	370	2		234.6	95.2	2		8.94	2.98	2					6									Hyvönen et al. 2013. The role of drainage ditches in greenhouse gas emissions and surface leaching losses from a cutaway peatland cultivated with a perennial bioenergy crop
Hyvönen et al. 2013	Drained	Peat extraction	Boreal									114.6	420.2								5190	890	2		176.8	47.6	2		110.26	56.62	2					6									Hyvönen et al. 2013. The role of drainage ditches in greenhouse gas emissions and surface leaching losses from a cutaway peatland cultivated with a perennial bioenergy crop
Hyvönen et al. 2013	Drained	Peat extraction	Boreal									39.2	143.733								4480	480	2		30.6	17	2		35.76	14.9	2					6									Hyvönen et al. 2013. The role of drainage ditches in greenhouse gas emissions and surface leaching losses from a cutaway peatland cultivated with a perennial bioenergy crop
Hyvönen et al. 2013	Drained	Peat extraction	Boreal																		2810	340	2		13.6	10.2	2		8.94	29.8	2					6									Hyvönen et al. 2013. The role of drainage ditches in greenhouse gas emissions and surface leaching losses from a cutaway peatland cultivated with a perennial bioenergy crop
Lottig et al. 2013	Drained		Temperate									6	22				3.66667																												Lottig et al. 2013. Comparisons of wetland and drainage lake influences on stream dissolved carbon concentrations and yields in a north temperate lake-rich region
Lottig et al. 2013	Drained		Temperate									15	55				29.3333																												Lottig et al. 2013. Comparisons of wetland and drainage lake influences on stream dissolved carbon concentrations and yields in a north temperate lake-rich region
Lottig et al. 2013	Drained		Temperate									13	47.6667				11																												Lottig et al. 2013. Comparisons of wetland and drainage lake influences on stream dissolved carbon concentrations and yields in a north temperate lake-rich region
Lottig et al. 2013	Drained		Temperate									18	66				3.66667																												Lottig et al. 2013. Comparisons of wetland and drainage lake influences on stream dissolved carbon concentrations and yields in a north temperate lake-rich region
Lottig et al. 2013	Drained		Temperate									6	22				14.6667																												Lottig et al. 2013. Comparisons of wetland and drainage lake influences on stream dissolved carbon concentrations and yields in a north temperate lake-rich region
Lottig et al. 2013	Drained		Temperate									13	47.6667				44																												Lottig et al. 2013. Comparisons of wetland and drainage lake influences on stream dissolved carbon concentrations and yields in a north temperate lake-rich region
Lottig et al. 2013	Drained		Temperate									9	33				11																												Lottig et al. 2013. Comparisons of wetland and drainage lake influences on stream dissolved carbon concentrations and yields in a north temperate lake-rich region
Lottig et al. 2013	Drained		Temperate									4	14.6667				7.33333																												Lottig et al. 2013. Comparisons of wetland and drainage lake influences on stream dissolved carbon concentrations and yields in a north temperate lake-rich region
Huotari et al. 2013	Drained		Boreal									61.415	225.188	34.8883			35.145	5.445			62700				18178.7											4.4									Huotari et al. 2013. Effect of catchment characteristics on aquatic carbon export from a boreal catchment and its importance in regional carbon cycling
Strack et al. 2008	Drained	WT manipulation	Temperate									87.63	321.31	328.9																															Strack et al. 2008. Effect of water table drawdown on peatland dissolved organic carbon export and dynamics
Strack et al. 2008	Drained	WT manipulation	Temperate									112.2	411.4	392.7																															Strack et al. 2008. Effect of water table drawdown on peatland dissolved organic carbon export and dynamics
Strack et al. 2008	Drained	WT manipulation	Temperate									92.82	340.34	142.12																															Strack et al. 2008. Effect of water table drawdown on peatland dissolved organic carbon export and dynamics
Strack et al. 2008	Drained	WT manipulation	Temperate									106.08	388.96	437.58																															Strack et al. 2008. Effect of water table drawdown on peatland dissolved organic carbon export and dynamics
Strack et al. 2008	Drained	WT manipulation	Temperate									83.64	306.68	235.62																															Strack et al. 2008. Effect of water table drawdown on peatland dissolved organic carbon export and dynamics
Cook et al. 2018	Drained	Agriculture	Tropical									382	1400.67	396																															Cook et al. 2018. Fluvial organic carbon fluxes from oil palm plantations on tropical peatland
Cook et al. 2018	Drained	Agriculture	Tropical									368	1349.33	385																															Cook et al. 2018. Fluvial organic carbon fluxes from oil palm plantations on tropical peatland
Cook et al. 2018	Drained	Agriculture	Tropical									364	1334.67	377.667																															Cook et al. 2018. Fluvial organic carbon fluxes from oil palm plantations on tropical peatland
Cook et al. 2018	Drained	Agriculture	Tropical									345	1265	355.667																															Cook et al. 2018. Fluvial organic carbon fluxes from oil palm plantations on tropical peatland
Cook et al. 2018	Drained	Agriculture	Tropical									421	1543.67	436.333																															Cook et al. 2018. Fluvial organic carbon fluxes from oil palm plantations on tropical peatland
Cook et al. 2018	Drained	Agriculture	Tropical									431	1580.33	447.333																															Cook et al. 2018. Fluvial organic carbon fluxes from oil palm plantations on tropical peatland
Cook et al. 2018	Drained	Agriculture	Tropical									563	2064.33	583																															Cook et al. 2018. Fluvial organic carbon fluxes from oil palm plantations on tropical peatland
Cook et al. 2018	Drained	Agriculture	Tropical									496	1818.67	29.3333																															Cook et al. 2018. Fluvial organic carbon fluxes from oil palm plantations on tropical peatland
Richardson et al. 2020	Drained	Agriculture	Mediterranean									177	649				799.333																												Richardson et al. 2020. Lateral Carbon Exports From Drained Peatlands: An Understudied Carbon Pathway in the Sacramento‐San Joaquin Delta, California
Richardson et al. 2020	Drained	Agriculture	Mediterranean									472	1730.67				1771																												Richardson et al. 2020. Lateral Carbon Exports From Drained Peatlands: An Understudied Carbon Pathway in the Sacramento‐San Joaquin Delta, California
Richardson et al. 2020	Drained	Agriculture	Mediterranean									141	517				568.333																												Richardson et al. 2020. Lateral Carbon Exports From Drained Peatlands: An Understudied Carbon Pathway in the Sacramento‐San Joaquin Delta, California
Richardson et al. 2020	Drained	Agriculture	Mediterranean									351	1287				1661																												Richardson et al. 2020. Lateral Carbon Exports From Drained Peatlands: An Understudied Carbon Pathway in the Sacramento‐San Joaquin Delta, California
Richardson et al. 2020	Drained	Agriculture	Mediterranean									433	1587.67				1279.67																												Richardson et al. 2020. Lateral Carbon Exports From Drained Peatlands: An Understudied Carbon Pathway in the Sacramento‐San Joaquin Delta, California
Richardson et al. 2020	Drained	Agriculture	Mediterranean									448	1642.67				1635.33																												Richardson et al. 2020. Lateral Carbon Exports From Drained Peatlands: An Understudied Carbon Pathway in the Sacramento‐San Joaquin Delta, California
Richardson et al. 2020	Drained	Agriculture	Mediterranean									137	502.333				634.333																												Richardson et al. 2020. Lateral Carbon Exports From Drained Peatlands: An Understudied Carbon Pathway in the Sacramento‐San Joaquin Delta, California
Richardson et al. 2020	Drained	Agriculture	Mediterranean									242	887.333				938.667																												Richardson et al. 2020. Lateral Carbon Exports From Drained Peatlands: An Understudied Carbon Pathway in the Sacramento‐San Joaquin Delta, California
Richardson et al. 2020	Drained	Agriculture	Mediterranean									64	234.667				253																												Richardson et al. 2020. Lateral Carbon Exports From Drained Peatlands: An Understudied Carbon Pathway in the Sacramento‐San Joaquin Delta, California
Richardson et al. 2020	Drained	Agriculture	Mediterranean									279	1023				740.667																												Richardson et al. 2020. Lateral Carbon Exports From Drained Peatlands: An Understudied Carbon Pathway in the Sacramento‐San Joaquin Delta, California
Richardson et al. 2020	Drained	Agriculture	Mediterranean									164	601.333				597.667																												Richardson et al. 2020. Lateral Carbon Exports From Drained Peatlands: An Understudied Carbon Pathway in the Sacramento‐San Joaquin Delta, California
Richardson et al. 2020	Drained	Agriculture	Mediterranean									145	531.667				480.333																												Richardson et al. 2020. Lateral Carbon Exports From Drained Peatlands: An Understudied Carbon Pathway in the Sacramento‐San Joaquin Delta, California
Richardson et al. 2020	Drained	Agriculture	Mediterranean									321	1177				1125.67																												Richardson et al. 2020. Lateral Carbon Exports From Drained Peatlands: An Understudied Carbon Pathway in the Sacramento‐San Joaquin Delta, California
Müller et al. 2015	Drained	Agriculture	Tropical									610	2236.67	366.667							1503.33	843.333																							Müller et al. 2015. Lateral carbon fluxes and CO2 outgassing from a tropical peat-draining river
Müller et al. 2015	Drained	Agriculture	Tropical									660	2420	330							660	330																							Müller et al. 2015. Lateral carbon fluxes and CO2 outgassing from a tropical peat-draining river
Lou et al. 2014	Drained	WT manipulation	Temperate									97.5	357.5	30.8																															Lou et al. 2014. Rapid Response of Hydrological Loss of DOC to Water Table Drawdown and Warming in Zoige Peatland: Results from a Mesocosm Experiment
Lou et al. 2014	Drained	WT manipulation	Temperate									116.5	427.167	61.6																															Lou et al. 2014. Rapid Response of Hydrological Loss of DOC to Water Table Drawdown and Warming in Zoige Peatland: Results from a Mesocosm Experiment
Gaffney et al. 2020	Drained	Forestry	Temperate									208.91	766.003				9.75333																												Gaffney et al. 2020. Restoration of afforested peatland: Immediate effects on aquatic carbon loss
Gaffney et al. 2020	Drained	Forestry	Temperate									143.71	526.937				9.20333																												Gaffney et al. 2020. Restoration of afforested peatland: Immediate effects on aquatic carbon loss
Gaffney et al. 2020	Drained	Forestry	Temperate									113.91	417.67				12.65																												Gaffney et al. 2020. Restoration of afforested peatland: Immediate effects on aquatic carbon loss
Gaffney et al. 2020	Drained	Forestry	Temperate									155.74	571.047				18.9933																												Gaffney et al. 2020. Restoration of afforested peatland: Immediate effects on aquatic carbon loss
Gaffney et al. 2020	Drained	Forestry	Temperate									198.62	728.273				27.39																												Gaffney et al. 2020. Restoration of afforested peatland: Immediate effects on aquatic carbon loss
Koskinen et al. 2017	Drained	Forestry	Boreal									120	440																																Koskinen et al. 2017. Restoration of nutrient-rich forestry-drained peatlands poses a risk for high exports of dissolved organic carbon, nitrogen, and phosphorus
Renou-Wilson et al. 2014	Drained	Grassland	Temperate					kg CO2 ha-1 yr-1	8250	2200	4	245	898.333	153.519	4		223.667	22	4		491.333	117.333	4										1632												Renou-Wilson et al. 2014. The impacts of drainage, nutrient status and management practice on the full carbon balance of grasslands on organic soils in a maritime temperate zone
Renou-Wilson et al. 2014	Drained	Grassland	Temperate					kg CO2 ha-1 yr-1	6380	916.667	4	245	898.333	153.519	4		223.667	22	4		491.333	117.333	4										1632												Renou-Wilson et al. 2014. The impacts of drainage, nutrient status and management practice on the full carbon balance of grasslands on organic soils in a maritime temperate zone
Renou-Wilson et al. 2014	Drained	Grassland	Temperate					kg CO2 ha-1 yr-1	12870	1466.67	4	456	1672	356.799	4		729.667	135.667	4		157.667	33	4										4306.67												Renou-Wilson et al. 2014. The impacts of drainage, nutrient status and management practice on the full carbon balance of grasslands on organic soils in a maritime temperate zone
Renou-Wilson et al. 2014	Drained	Grassland	Temperate					kg CO2 ha-1 yr-1	6783.33	1320	4	69	253	99.458	4		198	11	4		678.333	110	4										1632												Renou-Wilson et al. 2014. The impacts of drainage, nutrient status and management practice on the full carbon balance of grasslands on organic soils in a maritime temperate zone
Renou-Wilson et al. 2014	Drained	Grassland	Temperate					kg CO2 ha-1 yr-1	5023.33	1026.67	4	69	253	99.458	4		198	11	4		678.333	110	4										1632												Renou-Wilson et al. 2014. The impacts of drainage, nutrient status and management practice on the full carbon balance of grasslands on organic soils in a maritime temperate zone
Evans et al. 2016	Drained	Grassland	Temperate					kg CO2 ha-1 yr-1	2346.67																																				Evans et al. 2016. Lowland Peatland Systems in England and Wales – Evaluating Greenhouse Gas Fluxes and Carbon Balances. Final report to Defra on Project SP1210 (Centre for Ecology and Hydrology, 2016).
Peacock et al. 2019	Drained	Grassland	Temperate					kg CO2 ha-1 yr-1	8616.67																																				Peacock et al. 2019. The full carbon balance of a rewetted cropland fen and a conservation-managed fen. Agric. Ecosyst. Environ. 269, 1–12.
Peacock et al. 2019	Drained	Agriculture	Temperate					kg CO2 ha-1 yr-1	15730																																				Peacock et al. 2019. The full carbon balance of a rewetted cropland fen and a conservation-managed fen. Agric. Ecosyst. Environ. 269, 1–12.
Evans et al. 2021	Drained	Agriculture	Temperate					kg CO2 ha-1 yr-1	20496.7																																				Evans et al. 2021.Overriding water table control on managed peatland greenhouse gas emissions
Peacock et al. 2019	Drained	Agriculture	Temperate					kg CO2 ha-1 yr-1	2456.67																																				Peacock et al. 2019. The full carbon balance of a rewetted cropland fen and a conservation-managed fen. Agric. Ecosyst. Environ. 269, 1–12.
Boreal									5580.31	891.193			267.635	41.8392			35.145	5.445			4425	773.882			8503.21	2589.81			211.897	29.1546						4.20417	0.349455
SE																					186.034	36.0231			357.489	112.862			8.90851	1.43202
Temperate					-4980	501.802			12385.1	905.848			706.881	63.9134			87.1283	34.6393			7117.71	1766.06			10963.8	2843.06			246.238	97.9393			4586.92	1291.06		7.25273	1.35792
SE																					516.228	160.462			795.173	254.329			17.859	7.85091
Tropical									28526.7	7830.92			2220.04	561.688			960.385	137.045			9556.25	4902.64			71640.8	21906.6			1631.84	690.531						3.4	0.607454
SE																					324.913	176.508			2435.79	862.641			55.4826	25.4849
Overall					-4980	501.802	22		12602.8	986.525	77		1121.05	187.82	99		401.027	88.431	36		8627.87	2267.67	29		14944.7	3119.34	76		311.968	70.2712	46		4586.92	1291.06	11	5.76194	0.759475	62	9642.01	1135.56	5448.02	1308.45	17.9754	4.69126
SE
Count
Area-weighted on the basis of agriculture and grassland proportion					-3007.66	303.062			7611.43	595.809											497.133	146.172			861.102	212.572			17.9754	4.69126			573.535	161.431
Climate zone	Land use category	Area (kha)
Boreal	Forest	5475
	Cropland	262
	Deep-drained grassland	426
	Shallow-drained grassland	0
	Agriculture	3420
	Peat extraction	333
	Rewetted
Temperate	Forest	6315
	Cropland	2528
	Deep-drained grassland	3405
	Shallow-drained grassland	2422
	Agriculture	8389
	Peat extraction	662
	Rewetted
Tropical	Forest	7235
	Cropland	305
	Deep-drained grassland	70
	Shallow-drained grassland	0
	Agriculture	9314
	Peat extraction	8
	Rewetted
Total		50569
Agriculture		0.47891
Grassland		0.125037
Agriculture+grassland		0.603947
Peat extraction		0.0198343

## Sheet: ditches CH4 N2O
Peacock et al. 2021		Boreal	0.755982	271.642		Global importance of methane emissions from drainage ditches and canals								darinage ditch fraction 3%, ranges 1-5%						On-site N2O	Ditch N2O	Ditch N2O (kg ha-1 yr-1)	GWP
		Boreal	0.509939	136.654			CH4 ditch (kg CH4 ha−1 yr−1)													0.103543	0.212151	2.12151	632.21
		Boreal	0.665041	116.171		Forestry	217		IPCC 2014											0.11735	0.194392	1.94392	579.289
		Boreal	0.503321	82.9136		Agriculture	1165		IPCC 2014											0.0968524	0.167848	1.67848	500.187
		Boreal	0.759284	62.2088		Grassland	948		IPCC 2014											0.0776732	0.141301	1.41301	421.076
		Boreal	0.503909	63.7825		Peat extraction	542		IPCC 2014											0.155465	0.136351	1.36351	406.327
		Boreal	0.48933	42.7664																0.10464	0.111239	1.11239	331.494
		Boreal	0.475311	22.336																0.0802296	0.104477	1.04477	311.341
		Boreal	0.476039	16.142																0.0769254	0.101075	1.01075	301.204
		Boreal	0.414059	16.7584																0.084836	0.100375	1.00375	299.119
		Boreal	0.414339	14.7905																0.0940697	0.101718	1.01718	303.12
		Boreal	0.762082	17.8384																0.0854788	0.0928739	0.928739	276.764
		Boreal	0.746888	15.7437																0.100651	0.0962485	0.962485	286.821
		Boreal	0.724433	11.2365																0.0762361	0.0874404	0.874404	260.572
		Boreal	0.801746	11.5208																0.0940337	0.0853545	0.853545	254.356
		Boreal	0.663041	8.97395																0.0583951	0.0697536	0.697536	207.866
		Boreal	0.62665	3.22209																0.0933339	0.066947	0.66947	199.502
		Boreal	0.6738	2.32857																0.0913439	0.0614969	0.614969	183.261
		Boreal	0.829798	1.32729																0.0682701	0.062913	0.62913	187.481
		Boreal	0.60018	0.436661																0.109158	0.066911	0.66911	199.395
		Temperate	2.05498	390.229																0.076819	0.0526663	0.526663	156.946
		Temperate	1.77757	236.767																0.101218	0.0539745	0.539745	160.844
		Temperate	1.97197	152.914																0.0866791	0.0390075	0.390075	116.242
		Temperate	1.76425	90.49																0.0596193	0.0267963	0.267963	79.853
		Temperate	1.86516	77.8934																0.0826677	0.0137894	0.137894	41.0924
		Temperate	1.85765	70.4857																0.0885987	0.0124123	0.124123	36.9886
		Temperate	1.76486	68.7466
		Temperate	1.85835	51.5795
		Temperate	2.17551	52.8844
		Temperate	1.95929	43.8483
		Temperate	1.88276	30.1442
		Temperate	2.11431	38.6993
		Temperate	2.11456	34.5843
		Temperate	2.02222	27.6204
		Temperate	2.02312	18.5196
		Temperate	2.06208	16.3449
		Temperate	1.79132	16.142
		Temperate	2.15566	11.8123
		Temperate	1.92394	9.91707
		Temperate	1.8233	10.1679
		Temperate	1.7849	8.97395
		Temperate	2.10231	8.2226
		Temperate	1.77046	5.65276
		Temperate	2.08016	5.11518
		Temperate	2.15731	5.65276
		Temperate	1.95129	1.56131
		Temperate	2.04394	1.70398
		Temperate	2.21496	1.18615
		Temperate	1.80187	0.145462
		Tropical	3.44768	380.601
		Tropical	3.23155	303.963
		Tropical	3.59533	285.559
		Tropical	3.55732	211.591
		Tropical	3.51961	136.654
		Tropical	3.46693	70.4857
		Tropical	3.21203	58.4423
		Tropical	3.37443	60.6739
		Tropical	3.56011	60.6739
		Tropical	3.60628	67.8932
		Tropical	3.58794	7.72475
		Tropical	3.56765	66.2181

## Sheet: Peat extraction information
Year 1990																								1990	2010
soil use option (km2)	Belarus	Czech Rep.+ Slovakia	Denmark	Estonia	France	Finland	Germany	UK	Greece	Hungary	Iceland	Ireland	Latvia	Lithuania	Netherlands	Norway	Poland	Russia	Spain	Sweden	Switzerland	Ukraine	Total	EU		Canada	EU
Total national land area	207595	78864	43094	45227	543965	338145	356970	244110	131957	93030	103000	70273	63700	65300	41526	385639	312684		505990	449964	41285	603700	4726018	9484057	9484057
Total peatland area	23967	314	10000	10091	1100	104000	14200	17549	986	1000	10000	11757	6691	4826	2350	25000	10877	568000	383	103000	224	10081	936396	880196		1200000	285340
Pristine peatland			910	3000		42000					4000					20000				49000				530741	504608		81626.1
Drained for forestry	2800		nd	3000		57000	1100	6000			6	2100	5000	5900		4200	1200	38000		15000				181559	164394		132987
Drained for agriculture	9631	100	1000	3000	660	7000	12000	720	900	975	3750	896	1000	1900	2000	850-1500	7620	70400	23	10000	160	5000	138735	124490			43397.8
Drained for grassland																								27046			27046.1
Drained for peat extraction	130		9	510		1200	350	90			0	580				0	10			158				6627		250	283.15
Peat extraction percent (%)	0.542412		0.09	5.05401		1.15385	2.46479	0.51285			0	4.93323				0	0.0919371			0.153398				0.7529		0.0208333	0.0992325		1.13353	0.471567
Peat extraction depth (m)																											0.5
SOC (g kg-1)																											500
Soil moisture
BD (g cm-3)
Rewetted			nd			166					nd					0				12				8801.96
Drained peatland area																				25158				312676	219637
Drained percent (%)
From 35-Maljanen et al.2010;wise use of mires and peatlands;barthelmes et al.2009;Joosten et al.2016;
In Europe, only approximately 1% of the drained peatlands have been rewetted so far: from Tanneberger, F., Joosten, H., Moen, A. & Whinam, J. Mire and peatland conservation in Europe. In: Joosten, H., Tanneberger, F. & Moen, A. (eds.): Mires and peatlands of Europe – Status, distribution and conservation. Schweizerbart Science Publishers, Stuttgart, 173–196 (2017).
		SOC	SE	BD	SE	Soil depth	Area
		g kg-1		kg m-3		m	ha				9656										27046.1	92703.5
	Boreal	483.109	7.66764	86.6073	8.96837	0.4	1				7145.44										119750
	Temperate	269.683	21.9299	310.064	47.5204	0.4	1				Röder, N., Grützmacher, F., 2012
	Tropical	497.153	17.3853	154.722	19.1645	0.4	1
		Peat extracted C			weighted extracted C
	Boreal	613665	55511.3		6956.08	261.773
	Temperate	1.22641e+06	232862		13901.7	1098.1
	Tropical	1.12817e+06	134018		12788.1	631.986
	Overll	385.025	15.2921	174.152	19.5287	0.4	1
	Overll	983441	99726.3		11147.6	470.276
					221.105	9.32758

## Sheet: SOC loss via peat extraction  
Climate	Soil depth	SOC concentration	SD	Soil depth	BD	SD	Peat extraction depth	Area
	cm	g kg-1		cm	g cm-1		m	ha
Boreal	0-15	466.9	9.36496	0-20	0.068	0.009	0.4		465655
Boreal	0-20	496	8	0-20	0.063	0.012	0.4		458304
Boreal	0-20	481	11	0-20	0.059	0.008	0.4		416225
Boreal	0-20	473	16	0-20	0.034	0.003	0.4		235869
Boreal	0-20	447	8	0-10	0.03	0.00517235	0.4		196680
Boreal	0-10	450	8.66025	0-10	0.03	0.00517235	0.4		198000
Boreal	0-10	540	28.2843	0-10	0.1	0.0172412	0.4		792000
Boreal	0-30	507.5	3.53553	0-10	0.1	0.0172412	0.4		744333
Boreal	0-10	351.3	30.0457	0-30	0.0625	0.01253	0.4		322025
Boreal	0-20	410	35.0661	0-20	0.09	0.0155171	0.4		541200
Boreal	0-15	574.246	49.1136	0-15	0.051	0.008793	0.4		429536
Boreal	0-20	410	35.0661	0-20	0.035	0.00603441	0.4		210467
Boreal	0-10	490	41.9083	0-20	0.058	0.00999988	0.4		416827
Boreal	0-15	574.246	49.1136	0-20	0.067	0.0115516	0.4		564292
Boreal	0-20	496	8	0-20	0.064	0.0110344	0.4		465579
Boreal	0-20	481	11	0-20	0.139	0.0239652	0.4		980599
Boreal	0-20	473	16	0-10	0.035	0.00603441	0.4		242807
Boreal	0-20	447	8	0-10	0.058	0.00999988	0.4		380248
Boreal	0-10	490		0-10	0.067	0.0115516	0.4		481507
Boreal	0-10	450	8.66025	0-10	0.064	0.0110344	0.4		422400
Boreal	0-10	540	28.2843	0-10	0.139	0.0239652	0.4		1100880
Boreal	0-10	503		0-20	0.09	0.0155171	0.4		663960
Boreal	0-10	457.6		0-15	0.051	0.008793	0.4		342285
Boreal	0-10	482		0-15	0.06	0.02	0.4		424160
Boreal	0-65	480	10	0-20	0.068	0.009	0.4		478720
Boreal	65-80	480	20	0-20	0.063	0.012	0.4		443520
Boreal	0-15	466.9	9.36496	0-20	0.034	0.003	0.4		232827
Boreal	0-20	496	8	0-10	0.03		0.4		218240
Boreal	0-20	481	11	0-10	0.1		0.4		705467
Boreal	0-20	473	16	0-10	0.24	0.02	0.4		1.66496e+06
Boreal	0-20	447	8	0-10	0.4	0.12	0.4		2622400
Boreal	0-10	490	40.4666	0-65	0.18	0.01	0.4		1293600
Boreal	0-20	454	2.1	65-80	0.11	0.01	0.4		732453
Boreal	0-10	540	28.2843	0-65	0.18	0.01	0.4		1425600
Boreal	0-15	574.246	47.424	65-80	0.14	0.01	0.4		1.17912e+06
Boreal	0-10	519	42.8616	0-20	0.068	0.009	0.4		517616
Boreal				0-20	0.063	0.012
Boreal				0-20	0.034	0.003
Boreal				0-20	0.16	0.05
Boreal				0-10	0.03	0.00543716
Boreal				0-10	0.1	0.0181239
Boreal				0-20	0.035	0.00634335
Boreal				0-20	0.058	0.0105118
Boreal				0-20	0.26	0.047122
Boreal				0-20	0.067	0.012143
Boreal				0-20	0.064	0.0115993
Boreal				0-20	0.139	0.0251922
Boreal				0-10	0.035	0.00634335
Boreal				0-10	0.058	0.0105118
Boreal				0-10	0.067	0.012143
Boreal				0-10	0.064	0.0115993
Boreal				0-10	0.139	0.0251922
Boreal				0-15	0.051	0.00924317
Boreal				0-15	0.051	0.00924317
Boreal				0-10	0.0609	0.0110374
Mean		483.109			0.0866073		0.4
SE		7.66764			0.00896837		0.4
Temperate	0-10	206.37	34.79	0-10	0.31	0.068	0.4		938296
Temperate	0-10	160.87	69.68	0-10	0.352	0.083	0.4		830518
Temperate	0-25	410	20	0-5	0.1	0.02	0.4		601333
Temperate	0-10	521.3	44.5853	0-10	0.156	0.004	0.4		1.19273e+06
Temperate	0-15	97.1773	0.0144787	0-15	0.94	0.173205	0.4		1.33975e+06
Temperate	0-15	105.833	0.0229973	0-15	0.84	0.207846	0.4		1.30387e+06
Temperate	0-15	108.854	0.0172702	0-15	0.82	0.121244	0.4		1.30915e+06
Temperate	0-15	96.373	0.0213263	0-15	0.84	0.225167	0.4		1.18732e+06
Temperate	0-15	91.9482	0.0192527	0-15	1.03	0.207846	0.4		1.38903e+06
Temperate	0-15	163.652	0.0218441	0-15	0.69	0.0866025	0.4		1.65616e+06
Temperate	0-20	454	2.1	0-20	0.16	0.05	0.4		1.06539e+06
Temperate	0-60	38.1787	7.91183	0-60	0.36	0.01	0.4		201583
Temperate	0-10	149	12.7435	0-10	0.31	0.069282	0.4		677453
Temperate	0-10	145	12.4014	0-10	0.35	0.0866025	0.4		744333
Temperate	0-10	206.37	34.7969	0-10	0.31	0.069282	0.4		938296
Temperate	0-10	160.87	69.6804	0-10	0.35	0.0866025	0.4		825799
Temperate	0-10	206.37	34.7969	0-10	0.14	0.0244949	0.4		423746
Temperate	0-10	160.87	69.6804	0-10	0.13	0.0173205	0.4		306725
Temperate	0-10	206.37	34.7969	0-15	0.01	0.00172412	0.4		30267.6
Temperate	0-10	352	24.2487	0-10	0.13	0.0173205	0.4		671147
Temperate	0-15	499.4	7.96743	0-10	0.02	0.00848528	0.4		146491
Temperate	0-15	530	45.3294	0-10	0.04	0.00565685	0.4		310933
Temperate	0-10	350	29.9345	0-10	0.834437	0.213245	0.4		4.28344e+06
Temperate	0-10	460.92	8.6949	0-30	0.12	0.02	0.4		811219
Temperate	0-10	251.7	4.8151	0-30	0.06	0.01	0.4		221496
Temperate	0-10	350	29.9345	0-5	0.1	0.02	0.4		513333
Temperate	0-10	82.0295	6.64207	0-5	0.1	0.02	0.4		120310
Temperate	0-30	479	15	0-10	0.14	0.0244949	0.4		983547
Temperate	0-30	434	2	0-10	0.13	0.0173205	0.4		827493
Temperate	0-10	128.1	24.2	0-15	0.01	/	0.4		18788
Temperate	0-25	410	20	0-10	0.13	0.0173205	0.4		781733
Temperate	0-10	498	42.5925		0.14	0.08	0.4		1.02256e+06
Temperate	0-25	410	20		0.06	0.01	0.4		360800
Temperate	0-10	145	/		0.16	0.05	0.4		340267
Temperate	0-10	352	24.2487		0.14	0	0.4		722773
Temperate	0-15	499.4	7.96743	0-60	0.36	0.01	0.4		2636832
Temperate	0-15	530	/	0-5	0.35	0.08	0.4		2.72067e+06
Temperate	0-10	460.92	8.6949	0-5	0.56	0.21	0.4		3.78569e+06
Temperate	0	420	0
Temperate	0	454	2.1
Temperate	0	295	0
Temperate	0-60	38.1787	7.91183
Temperate	0-10	350	/
Temperate	0-5	321.8	19.1
Temperate	0-5	148.1	51
Temperate	0-10	301.6	0
Temperate	0-10	301.6	0
Temperate	0-10	130.9	0
Temperate	0-10	102.3	0
Temperate	0-10	128.1	24.2
Temperate	0-10	89.03	2.14
Temperate	0-10	31.01	1.83
Mean		269.683			0.310064		0.4
SE		21.9299			0.0475204		0.4
Tropical	0-10	498.6	3.6	0-20	0.15	0.0258618	0.4		1096920
Tropical	0-10	340	3.4641	10-15	0.132	0.009	0.4		658240
Tropical	0-10	540	17.3205	0-5	0.14	0.0241376	0.4		1108800
Tropical	0-20	276	23.6055	0-10	0.1	0.008	0.4		404800
Tropical	10-15	553	7	0-10	0.15	0.0069282	0.4		1216600
Tropical	0-10	555	8	0-10	0.1	0.008	0.4		814000
Tropical	0-10	540	17.3205	0-5	0.11	0.0189653	0.4		871200
Tropical	0-5	578	49.4347	0-5	0.11	0.0189653	0.4		932507
Tropical	0-10	551.624	12.8405	10-15	0.132	0.009	0.4		1.06794e+06
Tropical	0-25	478.1	15.0688	0-10	0.15	0.0069282	0.4		1051820
Tropical	0-10	551.624	12.8405	0-10	0.1	0.008	0.4		809049
Tropical	0-10	498.6	3.6	0-5	0.11	0.01	0.4		804408
Tropical	0-10	544.084	1.97216	0-25	0.146	0.008	0.4		1.16506e+06
Tropical	0-10	340	3.4641	0-5	0.2	0.034641	0.4		997333
Tropical	0-10	540	17.3205	0-10	0.46	0.034641	0.4		3643200
Tropical	10-15	553	7	6-15	0.15	0.01	0.4		1216600
Tropical	0-10	555	8	6-15	0.18	0.02	0.4		1465200
Tropical	0-25	478.1	15.0688	6-15	0.165	0.0111803	0.4		1.157e+06
Tropical	0-10	551.624	12.8405
Tropical	0-5	499	2
Tropical	0-10	431	3.4641
Tropical	6-15	485	49.4773												0.00180698
Mean		497.153			0.154722
SE		17.3853			0.0191645
Overall		385.025			0.174152
		15.2921			0.0195287
