# Supplementary material for: Declines of peatland water table forces climate warming despite methane emission drawdown
Source: Research Square preprint supplement (doi:10.21203/rs.3.rs-2839705/v1), 2023-05-08
Supplement: Supplementary file 3 [file 5cb7b0d439eeaea89a425768.xlsx]

## Sheet: Sheet1
Year 1990																								1990	2010
Soil use option (km2)	Belarus	Czech Rep.+ Slovakia	Denmark	Estonia	France	Finland	Germany	UK	Greece	Hungary	Iceland	Ireland	Latvia	Lithuania	Netherlands	Norway	Poland	Russia	Spain	Sweden	Switzerland	Ukraine	Total	EU		Canada	EU
Total national land area	207595	78864	43094	45227	543965	338145	356970	244110	131957	93030	103000	70273	63700	65300	41526	385639	312684		505990	449964	41285	603700	4726018	9484057	9484057
Total peatland area	23967	314	10000	10091	1100	104000	14200	17549	986	1000	10000	11757	6691	4826	2350	25000	10877	568000	383	103000	224	10081	936396	880196		1200000	285340
Pristine peatland			910	3000		42000					4000					20000				49000				530741	504608		81626.1
Drained for forestry	2800		nd	3000		57000	1100	6000			6	2100	5000	5900		4200	1200	38000		15000				181559	164394		132987
Drained for agriculture	9631	100	1000	3000	660	7000	12000	720	900	975	3750	896	1000	1900	2000	850-1500	7620	70400	23	10000	160	5000	138735	124490			43397.8
Drained for grassland																								27046			27046.1
Drained for peat extraction	130		9	510		1200	350	90			0	580				0	10			158				6627		250	283.15
Peat extraction percent (%)	0.542412		0.09	5.05401		1.15385	2.46479	0.51285			0	4.93323				0	0.0919371			0.153398				0.7529		0.0208333	0.0992325		1.13353	0.471567
Peat extraction depth (m)																											0.5
Drained peatland area																				25158				312676	219637
From 35-Maljanen et al.2010;wise use of mires and peatlands;barthelmes et al.2009;Joosten et al.2016;
In Europe, only approximately 1% of the drained peatlands have been rewetted so far: from Tanneberger, F., Joosten, H., Moen, A. & Whinam, J. Mire and peatland conservation in Europe. In: Joosten, H., Tanneberger, F. & Moen, A. (eds.): Mires and peatlands of Europe – Status, distribution and conservation. Schweizerbart Science Publishers, Stuttgart, 173–196 (2017).
