# Supplementary material for: Declines of peatland water table forces climate warming despite methane emission drawdown
Source: Research Square preprint supplement (doi:10.21203/rs.3.rs-2839705/v1), 2023-05-08
Supplement: Supplementary file 4 [file 95a9181e1b9549c5c8d3e950.docx]

**Declines of peatland water table forces climate warming despite methane emission drawdown**

Lei Ma1,2, Gretchen Gettel3, Christian Werner2, Ralf Kiese2, Hongchao Zuo1, Shuli Niu4,5, Jinsong Wang4,*, Xiangyue Chen1, Longlong Xia6, Yuhao Zhu7, Phillipe Ciais8, Klaus Butterbach-Bahl2,*

*1 College of Atmospheric Sciences, Lanzhou University, No. 222 Tianshui South Road, Chengguan District, Lanzhou 730000, P.R. China*

2 *Institute of Meteorology and Climate Research, Atmospheric Environmental Research, Karlsruhe Institute of Technology, Garmisch-Partenkirchen, 82467, Germany*

*3 IHE Delft, Institute for Water Education, PO Box 3015, NL-2601 Delft, DA, Netherlands*

*4* *Key Laboratory of Ecosystem Network Observation and Simulation, Institute of Geographical Sciences and Natural Resources Research, Chinese Academy of Sciences, Beijing, 100101, P.R. China*

*5* *School of Resources and Environment, University of Chinese Academy of Sciences, Beijing, 100049, P.R. China*

*6 State Key Laboratory of Soil and Sustainable Agriculture, Institute of Soil Science, Chinese Academy of Sciences, Nanjing, China*

*7 Mazingira Centre, International Livestock Research Institute (ILRI),Nairobi, Kenya*

*8 Laboratoire des Sciences du Climat et de l’Environnement, LSCE/IPSL, CEA-CNRS-UVSQ, Université Paris-Saclay, Gif-sur-Yvette, France*

* Corresponding author: Klaus Butterbach-Bahl/ Jinsong Wang

E-mail: [klaus.butterbach-bahl@kit.edu](mailto:klaus.butterbach-bahl@kit.edu)/ [wangjinsong@igsnrr.ac.cn](mailto:wangjinsong@igsnrr.ac.cn/)

Tel.: +49 8821 183-136

# **Extended Data Table 1| Annual greenhouse gas fluxes (kg CO2/CH4/N2O ha–1 yr–1) in the pristine peatland under different conditions.**

| **Condition** | **GPP** | ***R*e** | **NEE** | **CH4** | **N2O** |
| --- | --- | --- | --- | --- | --- |
| Overall | -28274(4933) | 26323(4865) | -1168(1003) | 207.68(24.66) | 0.70(0.17) |
| Climate |  |  |  |  |  |
| Tropical | -136892(4160) | 124176(9688) | -9432(8913) | 112.45(23.86) | 2.09(0.65) |
| Temperate | -17423(2839) | 15223(2526) | -1988(582) | 207.38(29.65) | 0.60(0.13) |
| Boreal | -12423(1511) | 11916(1199) | -421(455) | 130.40(18.88) | 0.53(0.25) |
| Nutrient type |  |  |  |  |  |
| Minerotrophic | -16301(2664) | 13224(2284) | -2334(439) | 233.33(30.43) | 0.73(0.19) |
| Ombrotrophic | -25205(5491) | 26551(5774) | 1084(543) | 104.60(19.33) | 0.45(0.22) |
| Peatland type |  |  |  |  |  |
| Bog | -18472(5210) | 14154(2152) | -3062(2371) | 84.57(14.65) | 0.16(0.04) |
| Fen | -12586(2074) | 10578(1666) | -1976(502) | 308.88(41.18) | 0.21(0.08) |
| Marsh | -47513(4352) | 42038(5221) | -4721(2114) | 90.51(18.38) | 1.08(0.40) |
| Swamp | -131074(1906) | 138394(2543) | 2606(1559) | 93.08(20.92) | 2.97(0.84) |
| Functional type |  |  |  |  |  |
| Cyperaceae | -13683(2764) | 10626(2250) | -1970(563) | 265.69(36.18) | 0.26(0.07) |
| Forest | -98306(14033) | 101564(15812) | 948(1381) | 117.47(19.49) | 1.59(0.53) |
| Graminoid | -69359(15438) | 45452(5348) | -23907(11675) | 300.61(162.45) | 1.24(0.30) |
| Peat moss | -9356(1552) | 9747(1400) | -179(621) | 123.20(25.83) | 0.02(0.03) |
| Shrub | -8254(603) | 9310(863) | 895(353) | 33.46(10.75) | 6.98(1.70) |
| Inundation |  |  |  |  |  |
| Permanently | -22300(6506) | 19671(6000) | -2445(1301) | 951.61(177.76) | 0.28(0.12) |
| Seasonally | -28104(4614) | 25674(4274) | -2009(1176) | 129.61(12.45) | 0.56(0.14) |
| Peat depth |  |  |  |  |  |
| ≤ 0.5 | NA | NA | -2212(513) | 112.97(36.77) | 0.80(0.30) |
| 0.5-1.0 | -27828(5606) | 21809(3211) | -4895(2325) | 92.29(16.88) | 0.58(0.19) |
| 1.0-3.0 | -28930(9053) | 28978(9478) | -581(933) | 173.74(36.90) | 0.32(0.23) |
| 3.0-5.0 | -8903(356) | 11141(537) | 1734(601) | 31.08(15.61) | 1.71(1.32) |
| > 5.0 | -17995(/) | 11580(/) | -4654(820) | 15.25(7.75) | 0.70(/) |
| Soil C/N |  |  |  |  |  |
| ≤ 15 | NA | NA | NA | 461.29(126.66) | 0.61(0.15) |
| 15-30 | -6424(1192) | 6093(1850) | -331(658) | 330.91(139.02) | 0.69(0.26) |
| 30-60 | NA | NA | -1750(3750) | 86.76(30.67) | 0.95(0.55) |
| > 60 | NA | NA | NA | 179.40(125.16) | 0.02(0.05) |
| Soil pH |  |  |  |  |  |
| ≤ 5 | -12077(2359) | 12141(1248) | -117(898) | 56.62(8.74) | 0.23(0.06) |
| 5-7 | -23786(5933) | 19036(3725) | -3261(1582) | 139.16(42.14) | 3.02(1.18) |
| > 7 | NA | NA | NA | 671.88(92.70) | -0.51(0.08) |
| SOC |  |  |  |  |  |
| ≤ 150 | NA | NA | NA | 16.77(9.44) | 0.65(0.25) |
| 150-350 | NA | NA | NA | 644.25(155.85) | 0.42(0.33) |
| 350-500 | -13481(5029) | 12738(4856) | -1550(803) | 114.49(35.66) | 1.49(0.78) |
| > 500 | NA | NA | NA | 149.26(71.31) | 1.29(0.72) |
| TN |  |  |  |  |  |
| ≤ 5 | NA | NA | NA | 16.77(9.44) | 0.65(0.25) |
| 5-10 | NA | NA | 2000(NA) | 59.23(11.27) | 0.61(0.18) |
| 10-20 | -6424(1192) | 6093(1850) | -2054(1765) | 364.94(78.31) | 1.00(0.42) |
| > 20 | NA | NA | NA | 97.94(36.12) | 0.90(0.10) |
| Micro-topography |  |  |  |  |  |
| Overall | -28546(6615) | 26441(6991) | -1658(627) | 213.02(29.85) | 0.75(0.21) |
| Hummock | -6805(996) | 8251(1152) | 1446(710) | 148.82(63.73) | 0.05(0.02) |
| Lawn | -4903(1000) | 4294(1004) | -610(393) | 197.60(114.39) | / |
| Hollow | -3870(1106) | 4830(1724) | 1144(750) | 185.01(86.11) | 0.11 |

Given data indicated as mean with one standard deviation. NA indicates no observation.

# **Extended Data Table 2| Annual greenhouse gas fluxes (kg CO2/CH4/N2O ha–1 yr–1) in the drained peatlands under different conditions.**

| **Condition** | **GPP** | ***R*e** | **NEE** | **CH4** | **N2O** |
| --- | --- | --- | --- | --- | --- |
| Overall | -26829(4277) | 29717(4172) | 3412(1007) | 25.48(5.24) | 3.63(0.59) |
| WT decline driver |  |  |  |  |  |
| Cropland | -37361(9107) | 33876(10020) | 1377(1305) | 15.03(8.20) | 3.68(0.76) |
| Cropland-N | NA | NA | 1790(NA) | 27.10(16.28) | 13.36(4.49) |
| Forestry | -59651(11210) | 62908(12757) | 2024(1327) | 11.17(2.45) | 1.99(0.46) |
| Grassland | -88130(36044) | 62495(22845) | -24386(13954) | 5.95(1.87) | 5.08(1.80) |
| Peat extraction | -35990(/) | 35670(NA) | 5190(3571) | 5.01(3.04) | 8.71(7.38) |
| Climate drying | -8581(1061) | 13903(1387) | 4840(867) | 84.61(24.97) | 0.22(0.15) |
| WT decline Intensity |  |  |  |  |  |
| Shallow | -16802(3378) | 15761(2823) | -1515(764) | 42.43(10.02) | 2.18(0.68) |
| Deep | -33602(9336) | 39708(8523) | 5933(2243) | 4.10(1.16) | 4.88(1.36) |
| Duration |  |  |  |  |  |
| ≤ 1 | -11555(3747) | 12377(2691) | 1376(1282) | 60.57(19.71) | 1.54(0.46) |
| 1-10 | -26244(7109) | 32658(7913) | 6248(1270) | 35.32(18.05) | 4.06(1.57) |
| 10-30 | -35504(12447) | 38761(9752) | 2299(3459) | 16.47(4.17) | 2.94(1.23) |
| 30-50 | -25037(6792) | 22424(5638) | -1919(1432) | 11.49(3.26) | 1.48(0.63) |
| > 50 | -29414(5854) | 28102(4519) | -2241(1958) | 13.49(6.98) | 7.38(2.64) |
| Climate |  |  |  |  |  |
| Tropical | -141033(9023) | 141788(9370) | 1913(6423) | 24.29(8.76) | 8.14(3.22) |
| Temperate | -16420(2836) | 18465(2747) | 3083(1003) | 28.44(8.95) | 3.00(0.71) |
| Boreal | -11610(1875) | 15688(1540) | 2528(1028) | 21.51(4.43) | 3.04(0.90) |
| Nutrient type |  |  |  |  |  |
| Minerotrophic | -15788(2364) | 14578(2480) | 274(796) | 15.68(3.49) | 4.29(0.78) |
| Ombrotrophic | -26792(5876) | 32652(6234) | 5748(1029) | 39.70(12.18) | 0.79(0.30) |
| Peatland type |  |  |  |  |  |
| Bog | -21728(6135) | 24354(3953) | 2126(1914) | 14.73(2.92) | 3.16(1.17) |
| Fen | -11879(1936) | 11211(1783) | 441(762) | 47.48(15.25) | 2.07(0.53) |
| Marsh | -23691(3456) | 35481(3888) | 8957(3229) | 10.11(4.71) | 2.16(0.49) |
| Swamp | -134200(6589) | 149311(7901) | 7890(2090) | 21.13(7.37) | 8.23(2.59) |
| Functional type |  |  |  |  |  |
| Cyperaceae | -14313(2444) | 12894(2529) | -1849(718) | 35.72(12.89) | 3.01(0.93) |
| Forest | -109013(11775) | 117349(14664) | 7071(1953) | 23.88(8.17) | 6.83(2.47) |
| Graminoid | -54724(20056) | 50220(11665) | -4503(9410) | 2.02(1.02) | 4.08(1.92) |
| Peat moss | -9313(2523) | 14553(1952) | 4855(1447) | 28.82(7.99) | 2.64(1.57) |
| Shrub | -6749(844) | 11827(1308) | 4033(1013) | 5.23(3.26) | 9.64(3.87) |
| Inundation |  |  |  |  |  |
| Permanently | -14937(4939) | 18907(5194) | 4111(2500) | 6.87(3.71) | 2.31(0.22) |
| Seasonally | -28978(4942) | 31670(4814) | 2489(1022) | 26.79(5.74) | 3.03(0.59) |
| Peat depth |  |  |  |  |  |
| ≤ 0.5 | NA | NA | 1220(821) | 43.54(17.41) | 1.17(0.30) |
| 0.5-1.0 | -21166(4316) | 17753(2450) | -3917(1288) | 32.82(12.00) | 2.27(0.91) |
| 1.0-3.0 | -27210(7457) | 29162(8158) | 2133(1247) | 77.64(25.52) | 10.76(5.61) |
| 3.0-5.0 | -6563(786) | 17329(995) | 10115(1339) | 1.47(0.36) | 10.55(6.66) |
| > 5.0 | -2055(/) | 3447(/) | 1539(1876) | 0.97(0.55) | 0.80(/) |
| Soil C/N |  |  |  |  |  |
| ≤ 15 | NA | NA | NA | 7.84(3.03) | 2.30(0.34) |
| 15-30 | -9328(1906) | 9587(2506) | 258(600) | 4.39(1.41) | 3.04(1.16) |
| 30-60 | NA | NA | -5575(849) | 5.05(1.62) | 9.15(4.96) |
| > 60 | NA | NA | NA | 16.71(5.22) | 0.05(0.01) |
| Soil pH |  |  |  |  |  |
| ≤ 5 | -8581(1559) | 17315(1049) | 5436(1461) | 11.57(2.73) | 2.23(0.88) |
| 5-7 | -19179(3889) | 16621(2210) | -1860(1228) | 14.78(6.26) | 7.19(2.68) |
| > 7 | NA | NA | NA | 6.04(1.06) | 0.26(0.06) |
| SOC |  |  |  |  |  |
| ≤ 150 | NA | NA | NA | 1.19(2.40) | 2.03(0.37) |
| 150-350 | NA | NA | NA | 10.12(3.09) | 2.51(0.29) |
| 350-500 | -12152(2640) | 12650(2869) | -2793(766) | 13.62(4.77) | 2.20(0.98) |
| > 500 | NA | NA | NA | 6.35(2.22) | 11.74(3.95) |
| TN |  |  |  |  |  |
| ≤ 5 | NA | NA | NA | 13.25(4.33) | 3.31(2.71) |
| 5-10 | NA | NA | -5600(/) | 13.07(2.72) | 1.91(0.31) |
| 10-20 | -9328(1906) | 9587(2506) | -2621(1680) | 6.74(1.65) | 5.32(2.28) |
| > 20 | NA | NA | NA | 3.26(3.45) | 4.00(1.57) |
| Micro-topography |  |  |  |  |  |
| Overall | -24577(5113) | 26299(5532) | 973(743) | 21.47(3.27) | 3.15(0.60) |
| Hummock | -6469(1059) | 9951(1110) | 3481(836) | 8.45(3.60) | 0.47(0.28) |
| Lawn | -6736(1880) | 7031(1872) | 295(604) | 45.16(35.57) | / |
| Hollow | -3861(456) | 14502(2764) | 10641(2546) | 55.70(37.86) | 1.19(0.92) |

Given data indicated as mean with one standard deviation. NA indicates no observation.

# **Extended Data Table 3| Summary of off-site mean annual GHG (CO2, CH4 and N2O) fluxes (kg CO2-eq. ha–1 yr–1) associated with the decline in the water table of pristine peatlands.** Note that due to lack of information, data are classified only by climate zones.

| **Climate** | **Manure**  **C inputa** | **Biomass C harvestb** | **C export by drainage ditches** | | **Emission of GHGs from drainage ditchesc** | | | **Peat C extraction**d |
| --- | --- | --- | --- | --- | --- | --- | --- | --- |
|  |  |  | DOC | DIC | CO2 | CH4 | N2O |  |
| Boreal | NA | 5580(891) | 268(42) | 35(5) | 4425(774) | 8503(2590) | 212(29) | 613665(55511) |
| Temperate | –4980(502) | 12385(906) | 707(64) | 87(35) | 7118(1766) | 10964(2843) | 246(98) | 781851(111990) |
| Tropical | NA | 28527(7831) | 2220(562) | 960(137) | 9556(4903) | 71641(21907) | 1632(691) | 1128168(134018) |

a input of manure C to drained peatlands used as agriculture land-use (cropland + grassland).

b refers to grass or crop harvest. Biomass removal in forestry land-use is not considered as the multidecadal rotations involved in logging process makes estimating the C balance highly uncertain.

c For the area-weighted GHG calculation, we assume that the mean ditch surface is 4.2 ± 0.4, 7.3 ± 1.4 and 3.4 ± 0.6% for drained peatlands in boreal, temperate and (sub)tropical regions, respectively (see Supplementary data D and Extended Data Fig. 7a).

d refers to drained peatlands that are used for peat extraction. Following earlier studies, we assume that 0.4 metres of peat is extracted annually50,51. Furthermore, we use the reported mean SOC concentration and bulk density values for this land use category to estimate total C loss due to peat extraction (Extended Data Fig. 8). According to our literature review (see Supplementary data E and Extended Data Fig. 7b), peat extraction is performed on 1.13 ± 0.47% of the global total drained peatland area.

More details on the off-site flux dataset are provided in Supplementary data B and Extended Data Figs. 7 and 8.

DOC: dissolved organic carbon; DIC: dissolved inorganic carbon.

The number in the brackets indicate the deviation from the mean for a 95% confidence interval. NA: No observation.

# **Extended Data Table 4| Number of studies reporting either chamber method or eddy covariance (EC) technique for measuring the on-site fluxes of GHGs. Only paired studies that focused on WT decline effects were considered.**

| **Flux** | **Pristine peatland** | | **Drained peatland** | | |
| --- | --- | --- | --- | --- | --- |
|  | **Chamber method** | **EC technique** | **Chamber method** | **EC technique** | |
| NEE | 109 | 33 | 109 | | 33 |
| GPP | 73 | 25 | 73 | | 25 |
| *R*e | 73 | 25 | 73 | | 25 |
| CH4 | 293 | 13 | 293 | | 13 |
| N2O | 134 | 0 | 134 | | 0 |

NEE: net ecosystem exchange of CO2, GPP: gross primary productivity, *R*e: ecosystem respiration, CH4: methane, N2O: nitrous oxide.

# **Extended Data Table 5| Summary of the mean ratios and 95% confidence intervals for growing season on-site net ecosystem CO2 exchange (NEE) to annual NEE for pristine and drained peatlands in temperate and boreal regions.**

| **Peatland status** | **Climate zone** | **Post WT decline land use** | **Peatland**  **type** | **Nutrient type** | **Micro-topography** | **Plant functional type** | **Mean ratio** | **95% CI** | **Sample**  **size** |
| --- | --- | --- | --- | --- | --- | --- | --- | --- | --- |
| Pristine | Boreal |  | Bog | Ombrotrophic | Hummock | Shrub | 0.80 | –0.32–1.93 | 3 |
| Pristine | Boreal |  | Bog | Ombrotrophic | Hollow | Moss | 1.55 | 1.04–2.06 | 10 |
| Pristine | Boreal |  | Bog | Ombrotrophic | Overall | Shrub | 1.37 | 1.12–1.62 | 2 |
| Pristine | Boreal |  | Fen | Minerotrophic | Overall | Cyperaceae | 2.54 | 2.24–2.84 | 9 |
| Pristine | Boreal |  | Fen | Minerotrophic | Overall | Moss | 1.22 | 1.09–1.35 | 5 |
| Pristine | Boreal |  | Fen | Minerotrophic | Overall | Shrub | 3.63 | –0.22–7.49 | 8 |
| Pristine | Boreal |  | Fen | Ombrotrophic | Hummock | Moss | 1.45 | 1.07–1.84 | 2 |
| Pristine | Boreal |  | Fen | Ombrotrophic | Hollow | Cyperaceae | 0.54 | 0.36–0.72 | 2 |
| Pristine | Boreal |  | Swamp | Minerotrophic | Overall | Shrub | 3.63 | –0.22–7.49 | 8 |
| Drained | Boreal | Forestry | Bog | Ombrotrophic | Overall | Moss | 1.41 | 1.19–1.62 | 5 |
| Drained | Boreal | Climate drying | Bog | Ombrotrophic | Overall | Moss | 1.59 | 1.33–1.84 | 11 |
| Drained | Boreal | Forestry | Fen | Minerotrophic | Overall | Cyperaceae | 1.41 | 1.19–1.62 | 5 |
| Drained | Boreal | Climate drying | Fen | Minerotrophic | Overall | Cyperaceae | –3.46 | –17.76–10.84 | 4 |
| Drained | Boreal | Climate drying | Fen | Ombrotrophic | Overall | Moss | 1.59 | 1.33–1.84 | 11 |
| Drained | Boreal | Forestry | Swamp | Minerotrophic | Overall | Shrub | 1.41 | 1.19–1.62 | 5 |
| Pristine | Temperate |  | Fen | Ombrotrophic | Overall | Graminoid | 1.33 | 0.87–1.79 | 23 |
| Pristine | Temperate |  | Fen | Minerotrophic | Overall | Moss | 0.83 | 0.17–1.49 | 9 |
| Pristine | Temperate |  | Bog | Ombrotrophic | Overall | Cyperaceae | 2.28 | 1.95–2.61 | 2 |
| Pristine | Temperate |  | Bog | Ombrotrophic | Overall | Moss | 1.20 | 0.52–1.88 | 15 |
| Pristine | Temperate |  | Bog | Ombrotrophic | Hummock | Shrub | 1.58 | 1.28–1.88 | 4 |
| Drained | Temperate | Forestry | Fen | Minerotrophic | Overall | Graminoid | 1.41 | 1.19–1.62 | 5 |
| Drained | Temperate | Forestry | Bog | Ombrotrophic | Overall | Moss | 1.41 | 1.19–1.62 | 5 |
| Drained | Temperate | Climate drying | Fen | Minerotrophic | Overall | Moss | –3.46 | –17.76–10.84 | 4 |
| Drained | Temperate | Climate drying | Bog | Ombrotrophic | Overall | Moss | 1.59 | 1.33–1.84 | 11 |

Note that gap-filling technique is not applied for (sub)tropical peatlands, as NEE was annually measured in (sub)tropical peatlands.

Also note that we simultaneously considered the factors peatland status, climate zone, post water table (WT) decline land use, peatland type, nutrient type, micro-topography and plant function type for gap-filling the growing season measured fluxes.

# **Extended Data Table 6| Summary of the mean ratios and 95% confidence intervals for growing season/wet season on-site net ecosystem methane (CH4) fluxes to annual fluxes for pristine and drained peatlands in different climate zones.**

| **Peatland status** | **Climate zone** | **Post WT decline land use** | **Peatland**  **type** | **Nutrient type** | **Micro-topography** | **Plant functional type** | **Mean ratio** | **95% CI** | **Sample**  **size** |
| --- | --- | --- | --- | --- | --- | --- | --- | --- | --- |
| Pristine | Boreal |  | Fen | Minerotrophic | Overall | Cyperaceae | 0.75 | 0.67–0.82 | 13 |
| Pristine | Boreal |  | Fen | Minerotrophic | Overall | Forest | 0.61 | 0.58–0.64 | 5 |
| Pristine | Boreal |  | Fen | Minerotrophic | Overall | Moss | 0.92 | 0.83–1.01 | 3 |
| Pristine | Boreal |  | Fen | Ombrotrophic | Hummock | Moss | 0.93 | 0.90–0.96 | 4 |
| Pristine | Boreal |  | Fen | Ombrotrophic | Lawn | Moss | 0.65 | 0.39–0.92 | 5 |
| Pristine | Boreal |  | Fen | Ombrotrophic | Hollow | Cyperaceae | 0.87 | 0.72–1.03 | 5 |
| Pristine | Boreal |  | Bog | Ombrotrophic | Hummock | Shrub | 0.87 | 0.83–0.92 | 4 |
| Pristine | Boreal |  | Bog | Ombrotrophic | Hollow | Moss | 0.76 | 0.64–0.89 | 6 |
| Pristine | Boreal |  | Bog | Ombrotrophic | Overall | Shrub | 0.85 | 0.82–0.89 | 3 |
| Pristine | Boreal |  | Bog | Ombrotrophic | Overall | Moss | 0.80 | 0.80–0.91 | 8 |
| Pristine | Boreal |  | Bog | Ombrotrophic | Overall | Forest | 0.71 | 0.66–0.77 | 17 |
| Pristine | Boreal |  | Swamp | Minerotrophic | Overall | Shrub | 0.79 | 0.72–0.85 | 21 |
| Pristine | Boreal |  | Marsh | / | Overall | Cyperaceae | 0.70 | 0.65–0.74 | 33 |
| Drained | Boreal | Forestry | Fen | Minerotrophic | Overall | Cyperaceae | 0.97 | 0.52–1.42 | 6 |
| Drained | Boreal | Forestry | Fen | Minerotrophic | Overall | Forest | 0.97 | 0.52–1.42 | 6 |
| Drained | Boreal | Climate drying | Fen | Minerotrophic | Overall | Cyperaceae | 0.61 | 0.53–0.69 | 4 |
| Drained | Boreal | Climate drying | Fen | Minerotrophic | Overall | Moss | 0.72 | 0.58–0.85 | 8 |
| Drained | Boreal | Climate drying | Fen | Ombrotrophic | Overall | Moss | 0.92 | 0.86–0.98 | 4 |
| Drained | Boreal | Forestry | Bog | Ombrotrophic | Overall | Shrub | 3.92 | –2.55–10.38 | 15 |
| Drained | Boreal | Forestry | Bog | Ombrotrophic | Hummock | Shrub | 0.86 | 0.79–0.92 | 3 |
| Drained | Boreal | Forestry | Bog | Ombrotrophic | Hollow | Moss | 5.38 | –1.98–8.79 | 18 |
| Drained | Boreal | Climate drying | Bog | Ombrotrophic | Overall | Moss | 3.76 | –2.30–9.81 | 16 |
| Drained | Boreal | Peat extraction | Bog | Ombrotrophic | Overall | Moss | 1.33 | 0.95–1.72 | 6 |
| Drained | Boreal | Cropland | Bog | Ombrotrophic | Overall | Moss | 6.89 | –0.33–14.12 | 2 |
| Drained | Boreal | Forestry | Swamp | Minerotrophic | Overall | Shrub | 0.97 | 0.52–1.42 | 6 |
| Drained | Boreal | Climate drying | Marsh | Minerotrophic | Overall | Cyperaceae | 0.96 | 0.63–1.30 | 10 |
| Pristine | Temperate |  | Fen | Minerotrophic | Overall | Cyperaceae | 0.94 | 0.92–0.95 | 3 |
| Pristine | Temperate |  | Fen | Minerotrophic | Overall | Moss | 0.70 | 0.55–0.86 | 10 |
| Pristine | Temperate |  | Fen | Minerotrophic | Hummock | Moss | 0.76 | 0.58–0.94 | 7 |
| Pristine | Temperate |  | Fen | Ombrotrophic | Overall | Graminoid | 0.69 | 0.53–0.85 | 4 |
| Pristine | Temperate |  | Fen | Ombrotrophic | Overall | Moss | 0.93 | 0.90–0.96 | 4 |
| Pristine | Temperate |  | Bog | Ombrotrophic | Overall | Cyperaceae | 0.83 | 0.70–0.96 | 14 |
| Pristine | Temperate |  | Bog | Ombrotrophic | Overall | Moss | 0.72 | 0.41–1.04 | 12 |
| Pristine | Temperate |  | Bog | Minerotrophic | Overall | / | 1.36 | 0.71–2.02 | 3 |
| Pristine | Temperate |  | Marsh | Minerotrophic | Overall | Cyperaceae | 0.87 | 0.75–0.99 | 9 |
| Pristine | Temperate |  | Marsh | Minerotrophic | Overall | Shrub | 0.97 | 0.89–1.04 | 5 |
| Pristine | Temperate |  | Marsh | Minerotrophic | Hummock | Cyperaceae | 0.90 | 0.84–0.97 | 18 |
| Pristine | Temperate |  | Marsh | Minerotrophic | Hollow | Cyperaceae | 0.90 | 0.84–0.97 | 18 |
| Pristine | Temperate |  | Marsh | Minerotrophic | Overall | Graminoid | 0.78 | 0.59–0.97 | 9 |
| Drained | Temperate | Forestry | Fen | Minerotrophic | Overall | Cyperaceae | 0.97 | 0.42–1.52 | 5 |
| Drained | Temperate | Forestry | Fen | Minerotrophic | Overall | Moss | 0.41 | –1.06–1.88 | 14 |
| Drained | Temperate | Forestry | Fen | Ombrotrophic | Overall | Graminoid | 3.41 | –1.98–8.79 | 18 |
| Drained | Temperate | Forestry | Fen | Ombrotrophic | Overall | Moss | 3.41 | –1.98–8.79 | 18 |
| Drained | Temperate | Forestry | Bog | Ombrotrophic | Overall | Moss | 0.41 | –1.06–1.88 | 14 |
| Drained | Temperate | Climate drying | Bog | Ombrotrophic | Overall | Moss | 0.41 | –1.06–1.88 | 14 |
| Drained | Temperate | Forestry | Bog | Minerotrophic | Overall | / | 0.89 | –2.70–4.48 | 5 |
| Drained | Temperate | Forestry | Marsh | Minerotrophic | Overall | Cyperaceae | 1.01 | –0.03–2.05 | 2 |
| Drained | Temperate | Forestry | Marsh | Minerotrophic | Hummock | Cyperaceae | 1.04 | 0.43–1.65 | 2 |
| Drained | Temperate | Forestry | Marsh | Minerotrophic | Hollow | Cyperaceae | 1.96 | 1.61–2.31 | 2 |
| Drained | Temperate | Forestry | Marsh | Minerotrophic | Overall | Shrub | 1.34 | 0.83–1.84 | 6 |
| Drained | Temperate | Grassland | Marsh | Minerotrophic | Overall | Graminoid | 0.97 | 0.09–1.86 | 18 |
| Drained | Temperate | Grassland | Marsh | Minerotrophic | Overall | Cyperaceae | 0.99 | –0.01–1.99 | 16 |
| Pristine | (sub)Tropical |  | Swamp | Ombrotrophic | Overall | Forest | 0.71 | 0.39–1.03 | 4 |
| Drained | (sub)Tropical | Forestry | Swamp | Ombrotrophic | Overall | Forest | 0.36 | –0.23–0.96 | 1 |

Note that we simultaneously considered the factors peatland status, climate zone, post water table (WT) decline land use, peatland type, nutrient type, micro-topography and plant function type for gap-filling the growing season or wet season measured fluxes.

“/” indicate not available.

# **Extended Data Table 7| Summary of the mean ratios and 95% confidence intervals for growing season/wet season on-site net ecosystem nitrous oxide (N2O) fluxes to annual fluxes for pristine and drained peatlands in different climate zones.**

| **Peatland status** | **Climate zone** | **Post WT decline land use** | **Peatland**  **type** | **Nutrient type** | **Micro-topography** | **Plant functional type** | **Mean ratio** | **95% CI** | **Sample**  **size** |
| --- | --- | --- | --- | --- | --- | --- | --- | --- | --- |
| Pristine | Boreal |  | Fen | Minerotrophic | Overall | Cyperaceae | 0.73 | 0.60–0.87 | 2 |
| Pristine | Boreal |  | Fen | Ombrotrophic | Overall | Moss | 0.35 | 0.01–0.69 | 5 |
| Pristine | Boreal |  | Bog | Ombrotrophic | Overall | Moss | 0.43 | –0.10–0.96 | 3 |
| Pristine | Boreal |  | Bog | Ombrotrophic | Hummock | Moss | 0.35 | 0.01–0.69 | 5 |
| Pristine | Boreal |  | Swamp | Minerotrophic | Overall | Shrub | 0.55 | 0.22–0.88 | 5 |
| Drained | Boreal | Forestry | Fen | Minerotrophic | Overall | Cyperaceae | 0.48 | 0.38–0.58 | 2 |
| Drained | Boreal | Forestry | Fen | Ombrotrophic | Overall | Moss | 0.48 | 0.38–0.58 | 2 |
| Drained | Boreal | Forestry | Bog | Ombrotrophic | Overall | Moss | 0.68 | 0.59–0.77 | 13 |
| Drained | Boreal | Peat extraction | Bog | Ombrotrophic | Overall | Moss | 0.50 | 0.50–0.50 | 1 |
| Drained | Boreal | Forestry | Swamp | Minerotrophic | Overall | Shrub | 0.63 | 0.56–0.71 | 13 |
| Pristine | Temperate |  | Fen | Minerotrophic | Overall | / | 0.73 | 0.60–0.87 | 2 |
| Pristine | Temperate |  | Bog | Minerotrophic | Overall | / | 0.77 | –1.47–3.01 | 13 |
| Pristine | Temperate |  | Bog | Ombrotrophic | Overall | Moss | 0.70 | 0.44–0.96 | 6 |
| Pristine | Temperate |  | Marsh | Minerotrophic | Overall | Cyperaceae | 1.43 | –1.21–4.07 | 10 |
| Pristine | Temperate |  | Marsh | Minerotrophic | Overall | Graminoid | 1.43 | –1.21–4.07 | 10 |
| Pristine | Temperate |  | Swamp | / | Overall | Forest | 0.47 | –0.30–1.24 | 2 |
| Drained | Temperate |  | Fen | Minerotrophic | Overall | / | 0.45 | 0.37–0.54 | 4 |
| Drained | Temperate | Climate drying | Fen | Minerotrophic | Overall | / | 0.45 | 0.37–0.54 | 4 |
| Drained | Temperate | Cropland | Bog | Minerotrophic | Overall | / | 0.58 | 0.43–0.74 | 31 |
| Drained | Temperate | Cropland | Bog | Ombrotrophic | Overall | Moss | 0.74 | 0.27–1.22 | 2 |
| Drained | Temperate | Cropland | Swamp | / | Overall | Forest | 0.99 | 0.99–0.99 | 1 |
| Drained | Temperate | Forestry | Marsh | Minerotrophic | Overall | Cyperaceae | 0.65 | 0.57–0.73 | 12 |
| Drained | Temperate | Grassland | Marsh | Minerotrophic | Overall | Graminoid | 0.41 | –0.12–0.93 | 8 |
| Pristine | (sub)Tropical |  | Swamp | / | Overall | Forest | 0.41 | 0.11–0.71 | 2 |
| Drained | (sub)Tropical | Cropland | Swamp | / | Overall | Forest | 0.56 | 0.56–0.56 | 1 |
| Drained | (sub)Tropical | Grassland | Swamp | / | Overall | Forest | 0.56 | 0.56–0.56 | 1 |

Note that we simultaneously considered the factors peatland status, climate zone, post water table (WT) decline land use, peatland type, nutrient type, micro-topography and plant function type for gap-filling the growing season or wet season measured fluxes.

“/” indicate not available.

# **Extended Data Table 8| Net changes in annual net ecosystem CO2 balance [NECB]), CH4 and N2O balance (i.e., △NECB, △NECH4B and △NEN2OB) following water table (WT) decline.** Data are categorized by climate zone, post-WT decline land use and years since the initial WT decline. The mean values ± 95% confidence intervals (CIs) are given.

| **Climate zone** | **Post WT decline** **land use** | **Years since initial WT decline (yrs)** | **△NECB** | **△NECH4B** | **NEN2OB** |
| --- | --- | --- | --- | --- | --- |
|  |  |  | **(kg CO2-eq. ha–1 yr–1)** | | |
| Overall | Overall | Before WT decline, control | –1168 ± 1003 | 7061 ± 838 | 210 ± 51 |
|  |  | ≤ 1 | 9823 ± 2154 | –2259 ± 2050 | 253 ± 186 |
|  |  | 1–10 | 12495 ± 2643 | –1730 ± 1155 | 1044 ± 931 |
|  |  | 10–30 | 16558 ± 4095 | –1605 ± 796 | 801 ± 657 |
|  |  | 30–50 | 5456 ± 1503 | –11202 ± 4009 | 256 ± 180 |
|  |  | >50 | 10063 ± 1733 | –4641 ± 3489 | 1965 ± 1599 |
| Boreal | Agriculture | Before WT decline, control | –3870 ± 1260 | 20126 ± 10973 | –6 ± 100 |
|  |  | ≤1 | NA | NA | NA |
|  |  | 1–10 | NA | NA | NA |
|  |  | 10–30 | NA | NA | NA |
|  |  | 30–50 | 7521 ± 4423 | NA | NA |
|  |  | >50 | NA | –19452 ± 21033 | 4658 ± 1501 |
|  | Forestry | Before WT decline, control | –1457 ± 959 | 4636 ± 798 | 182 ± 105 |
|  |  | ≤1 | –1133 ± 2557 | –4453 ± 907 | 122 ± 195 |
|  |  | 1–10 | NA | –3328 ± 3748 | NA |
|  |  | 10–30 | 991 ± 18232 | –3360 ± 1965 | 556 ± 436 |
|  |  | 30–50 | –2198 ± 4362 | –3963 ± 2040 | 254 ± 196 |
|  |  | >50 | NA | –4336 ± 5793 | 307 ± 30 |
|  | Peat extraction | Before WT decline, control | 261 ± 2272 | 3620 ± 844 | 14 ± 18 |
|  |  | ≤1 | 13855 ± 1379 | NA | NA |
|  |  | 1–10 | NA | –2055 ± 1700 | 410 ± 652 |
|  |  | 10–30 | NA | NA | NA |
|  |  | 30–50 | 12987 ± 8848 | NA | NA |
|  |  | >50 | NA | –2932 ± 2453 | NA |
|  | Climate drying | Before WT decline, control | –636 ± 642 | 3346 ± 1132 | 27 ± 9.6 |
|  |  | ≤1 | 5275 ± 2855 | –2827 ± 3948 | 48 ± 70 |
|  |  | 1–10 | 3879 ± 2402 | –65 ± 322 | NA |
|  |  | 10–30 | 6952 ± 2946 | –422 ± 301 | NA |
|  |  | 30–50 | NA | NA | NA |
|  |  | >50 | NA | NA | NA |
| Temperate | Agriculture | Before WT decline, control | –3717 ± 1480 | 16064 ± 3703 | 240 ± 59 |
|  |  | ≤1 | NA | 494 ± 457 | 541 ± 361 |
|  |  | 1–10 | NA | 804± 256 | 602 ± 190 |
|  |  | 10–30 | NA | –5681 ± 10704 | NA |
|  |  | 30–50 | NA | –29831 ± 9895 | NA |
|  |  | >50 | 13850 ± 1501 | –3898 ± 1413 | 1847 ± 2635 |
|  | Forestry | Before WT decline, control | –2194 ± 823 | 4533 ± 1262 | 132 ± 53 |
|  |  | ≤1 | NA | 414 ± 261 | –10 ± 29 |
|  |  | 1–10 | 2670 ± 468 | –40 ± 450 | 315 ± 271 |
|  |  | 10–30 | 2190 ± 609 | –1864 ± 1117 | 519 ± 94 |
|  |  | 30–50 | 1276 ± 2379 | –10030 ± 6726 | 181 ± 85 |
|  |  | >50 | 1579 ± 1175 | 162 ± 443 | 31 ± 33 |
|  | Peat extraction | Before WT decline, control | 261 ± 2272 | 3853 ± 1188 | 14 ± 25 |
|  |  | ≤1 | 16583 ± 1463 | –1110 ± 269 | 30 ± 10 (2) |
|  |  | 1–10 | NA | NA | NA |
|  |  | 10–30 | NA | NA | NA |
|  |  | 30–50 | 15715 ± 8861 | –2265 ± 1483 | NA |
|  |  | >50 | NA | –1687 ± 1160 | NA |
|  | Climate drying | Before WT decline, control | –623 ± 834 | 11564 ± 2596 | 27 ± 10 |
|  |  | ≤1 | 2069 ± 215 | –1400 ± 7158 | 57 ± 71 |
|  |  | 1–10 | 8733 ± 5176 | –10287 ± 5308 | NA |
|  |  | 10–30 | NA | NA | NA |
|  |  | 30–50 | NA | NA | NA |
|  |  | >50 | 5364 ± 1456 | –2907 ± 5811 | NA |
| Tropical | Agriculture | Before WT decline, control | –15376 ± 13251 | 3659 ± 1073 | 800 ± 377 |
|  |  | ≤1 | NA | –5739 ± 7741 | NA |
|  |  | 1–10 | NA | 1 ± 904 | 781 ± 964 |
|  |  | 10–30 | 56745 ± 11128 | –2145 ± 3648 | 324 ± 152 |
|  |  | 30–50 | NA | NA | NA |
|  |  | >50 | NA | NA | NA |
|  | Forestry | Before WT decline, control | 7361 ± 2302 | 3537 ± 1116 | 325 ± 202 |
|  |  | ≤1 | NA | –11824 ± 10556 | NA |
|  |  | 1–10 | 11053 ± 2956 | NA | NA |
|  |  | 10–30 | 11865 ± 6782 | 166 ± 1712 | 2005 ± 3401 |
|  |  | 30–50 | NA | NA | NA |
|  |  | >50 | NA | NA | NA |

NA indicates no observation; therefore, they were gap-filled using observations for other WT decline duration classes for a given climate and post-WT decline land use. The WT decline effects on net changes in on-site NEE, CH4 and N2O fluxes (i.e., △NEE, △CH4 and △N2O) for (sub)tropical peat extraction and climate drying are gap-filled using all measurements from (sub)tropical climate. For details on gap-filling, see Methods. To increase sample sizes for agriculture land-use, measurements with and without fertilization are combined. The number in parenthesis indicate samples sizes for a given category.

△NECB: changes in net ecosystem carbon balance. Calculated as △NEE + peat extraction + manure input + biomass harvest + (DOC + DIC) export + ditch-CO2 emissions (see Extended Data Table 8).

△NECH4B: changes in net ecosystem CH4 balance. Calculated as △CH4 + ditch-CH4 emissions (see Extended Data Table 8).

△NEN2OB: changes in net ecosystem N2O balance. Calculated as △N2O + ditch-N2O emissions (see Extended Data Table 8).

△NEGHGB: changes in net ecosystem greenhouse gas balance, i.e., △NECB + △CH4B + △N2OB (all fluxes in CO2-eq.) (see Extended Data Table 9).

Note that negative values of △NECB indicate an increased net ecosystem uptake of CO2, while for all other categories, negative values refer to decreases in the relevant flux (CH4 and N2O emissions). CH4 and N2O fluxes are converted to CO2-eq. using respective global warming potentials of 34 (CH4) and 298 (N2O)8.

# **Extended Data Table 9| Drainage effect on net annual greenhouse gas emissions from peatland classified by climate zone and land use.**

| **Climate zone** | **Land use** | **Drained peat area** | **△NECB** | **△NECH4B** | **△NEN2OB** | **△NEGHGB** |
| --- | --- | --- | --- | --- | --- | --- |
|  |  | **(×103 km2)** | **(kg CO2-eq. ha–1 yr–1)** | | | |
| Boreal | Agriculture | 67.54 ± 26.46 | 7521 ± 4423 | –19452 ± 21033 | 4658 ± 1501 | 7274 ± 21546 |
|  | Forest | 57.88 ± 3.13 | –1600 ± 3456 | –3794 ± 1274 | 330 ± 173 | –5064 ± 3687 |
|  | Peat extraction | 3.34 ± 0.01 | 12374 ± 3525 | –2501 ± 509 | 410 ± 652 | 10284 ± 3621 |
| Temperate | Agriculture | 115.22 ± 52.22 | 12261 ± 1917 | –11623 ± 5242 | 1107 ± 619 | 1745 ± 5616 |
|  | Forest | 53.08 ± 10.08 | 4600 ± 2562 | –2030 ± 1297 | 432 ± 202 | 3002 ± 2879 |
|  | Peat extraction | 4.44 ± 2.18 | 15102 ± 3559 | –3019 ± 2253 | 30 ± 10 | 12113 ± 4212 |
| Tropical | Agriculture | 114.75 ± 17.86 | 50459 ± 11390 | 172 ± 1582 | 2032 ± 2362 | 52663 ± 11739 |
|  | Forest | 90.68 ± 18.33 | 11256 ± 2559 | –537 ± 2344 | 1397 ± 2283 | 12116 ± 4154 |
|  | Peat extraction | 0.24 ± 0.16 | 45714 ± 9444a | –397 ± 1527a | 1739 ± 1593a | 47055 ± 9699a |

Given data indicate mean with 95% confidence interval.NECB, net ecosystem CO2 balance. NECH4B, net ecosystem CH4 balance. NEN2OB, net ecosystem N2O balance.NEGHGB, net ecosystem greenhouse gas balance.Net changes of annual NECB, CH4, N2O and NEGHGB (i.e., △NECB, △NECH4B, △NEN2OB, △NEGHGB) by drainage (categorized by climate zone and land-use) are estimated using the data in Extended Data Table 3 and Fig. S9. Note that off-site fluxes in Extended Dat Table 2 are categorized by only climate zone, as lacking enough measurements for further classifying by land-use.

Drained peatland area is cited from refs. Günther et al. (2020)1 and Leifeld and Menichetti. (2018)2. CH4 and N2O fluxes are converted to CO2-eq. using respective global warming potentials of 34 (CH4) and 298 (N2O)8.

a indicates gap-filled data using all observations in (sub)tropical climate zones.

# **Extended Data Table 10| Drainage effect on total net annual greenhouse gas emissions from peatland classified by climate zone and land use.**

| **Climate zone** | **Land use** | **△NECB** | **△NECH4B** | **△NEN2OB** | **△NEGHGB** |
| --- | --- | --- | --- | --- | --- |
|  |  | **(Pg CO2-eq. yr–1)** | | | |
| Boreal | Agriculture | 0.051 ± 0.036 | –0.131 ± 0.151 | 0.031 ± 0.016 | 0.049 ± 0.156 |
|  | Forest | –0.009 ± 0.020 | –0.022 ± 0.007 | 0.002 ± 0.001 | –0.029 ± 0.021 |
|  | Peat extraction | 0.004 ± 0.001 | –0.001 ± 0.000 | 0.000 ± 0.000 | 0.003 ± 0.001 |
| Temperate | Agriculture | 0.141 ± 0.068 | –0.086 ± 0.013 | 0.009 ± 0.020 | 0.020 ± 0.110 |
|  | Forest | 0.024 ± 0.014 | –0.011 ± 0.007 | 0.002 ± 0.001 | 0.016 ± 0.016 |
|  | Peat extraction | 0.007 ± 0.004 | –0.001 ± 0.001 | 0.000 ± 0.000 | 0.005 ± 0.004 |
| Tropical | Agriculture | 0.579 ± 0.159 | 0.002 ± 0.018 | 0.023 ± 0.027 | 0.604 ± 0.162 |
|  | Forest | 0.102 ± 0.031 | –0.005 ± 0.021 | 0.013 ± 0.021 | 0.110 ± 0.043 |
|  | Peat extraction | 0.001 ± 0.001 | –0.000 ± 0.000 | 0.000 ± 0.000 | 0.001 ± 0.001 |
| All climates | Agriculture | 0.900 ± 0.181 | –0.303 ± 0.176 | 0.085 ± 0.039 | 0.682 ± 0.255 |

Given data indicate mean with 95% confidence interval.NECB, net ecosystem CO2 balance. NECH4B, net ecosystem CH4 balance. NEN2OB, net ecosystem N2O balance.NEGHGB, net ecosystem greenhouse gas balance.Net changes of annual NECB, CH4, N2O and NEGHGB (i.e., △NECB, △NECH4B, △NEN2OB, △NEGHGB) by drainage (categorized by climate zone and land-use) are estimated using the data in Extended Data Table 3 and Fig. S9.

CH4 and N2O fluxes are converted to CO2-eq. using respective global warming potentials of 34 (CH4) and 298 (N2O)8.

# **Extended Data Table 11| Summary of global net annual greenhouse gas emissions from pristine peatland due to drainage activities.**

| **Study** | **On-site GHGs** | **Off-site GHGs** | **Peat**  **fire** | **Drained peat**  **area (×103 km2)** | **Period** | **Method** | **Driver** | **Flux**  **(Pg CO2-eq. yr–1)** |
| --- | --- | --- | --- | --- | --- | --- | --- | --- |
| Leifeld and  Menichetti1 | CO2, CH4, N2O | DOC | No | 506.00 |  | IPCC EFs | Agriculture  Grassland  Forestry | 1.91 (0.31–3.38) |
| Leifeld et al.2 | CO2, CH4, N2O | DOC | No | 490.00 | 2015 | IPCC EFs | Agriculture  Grassland  Forestry | 1.53 (0.73–2.33) |
| Carlson et al.3 | CO2, N2O | No | No | 136.00 | 2000 | IPCC EFs | Agriculture | 0.69 (0.54–0.72) |
| Tubiello et al.4 | CO2, N2O | No | No | 250.00 |  | IPCC EFs | Agriculture | 1.00 |
| Evans et al.5 | CO2, CH4 | Biomass harvest | No | 290.00 |  | IPCC EFs and empirical models | Agriculture  Grassland | 0.79 (0.50–1.13) |
| Joosten6 | CO2, CH4 | No | No | 447.60 | 1990 | IPCC EFs | Agriculture  Forestry  Peat extraction | 0.85 |
| Joosten6 | CO2, CH4 | No | No | 463.50 | 2008 | IPCC EFs | Agriculture  Forestry  Peat extraction | 0.39 |
| Huang et al.7 | CO2, CH4 | No | No |  | 2100 | Meta-analysis | Climate drying under RCP8.5 | 0.86 (0.36–1.36) |
| Huang et al.7 | CO2, CH4 | No | No |  | 2100 | Meta-analysis | Climate drying under RCP2.6 | 0.73 (0.20–1.20) |
| This study | CO2, CH4, N2O | DOC, DIC, Ditch CO2, CH4, N2O, Manure C, Biomass harvest, Extracted peat C | No | 507.15 |  | Meta-analysis | Agriculture (cropland+grassland)  Forestry  Peat extraction | 0.68 (0.43–0.94) |

Given flux data indicate mean with 95% confidence interval.

# **Extended Data Table 12| Number of studies reporting either chamber method or eddy covariance (EC) technique for measuring the on-site fluxes of GHGs. Only paired studies that focused on WT decline effects were considered.**

| **Flux** | **Pristine peatland** | | **Drained peatland** | | |
| --- | --- | --- | --- | --- | --- |
|  | **Chamber method** | **EC technique** | **Chamber method** | **EC technique** | |
| NEE | 109 | 33 | 109 | | 33 |
| GPP | 73 | 25 | 73 | | 25 |
| *R*e | 73 | 25 | 73 | | 25 |
| CH4 | 293 | 13 | 293 | | 13 |
| N2O | 134 | 0 | 134 | | 0 |

NEE: net ecosystem exchange of CO2, GPP: gross primary productivity, *R*e: ecosystem respiration, CH4: methane, N2O: nitrous oxide.

# Extended Data Fig. 1


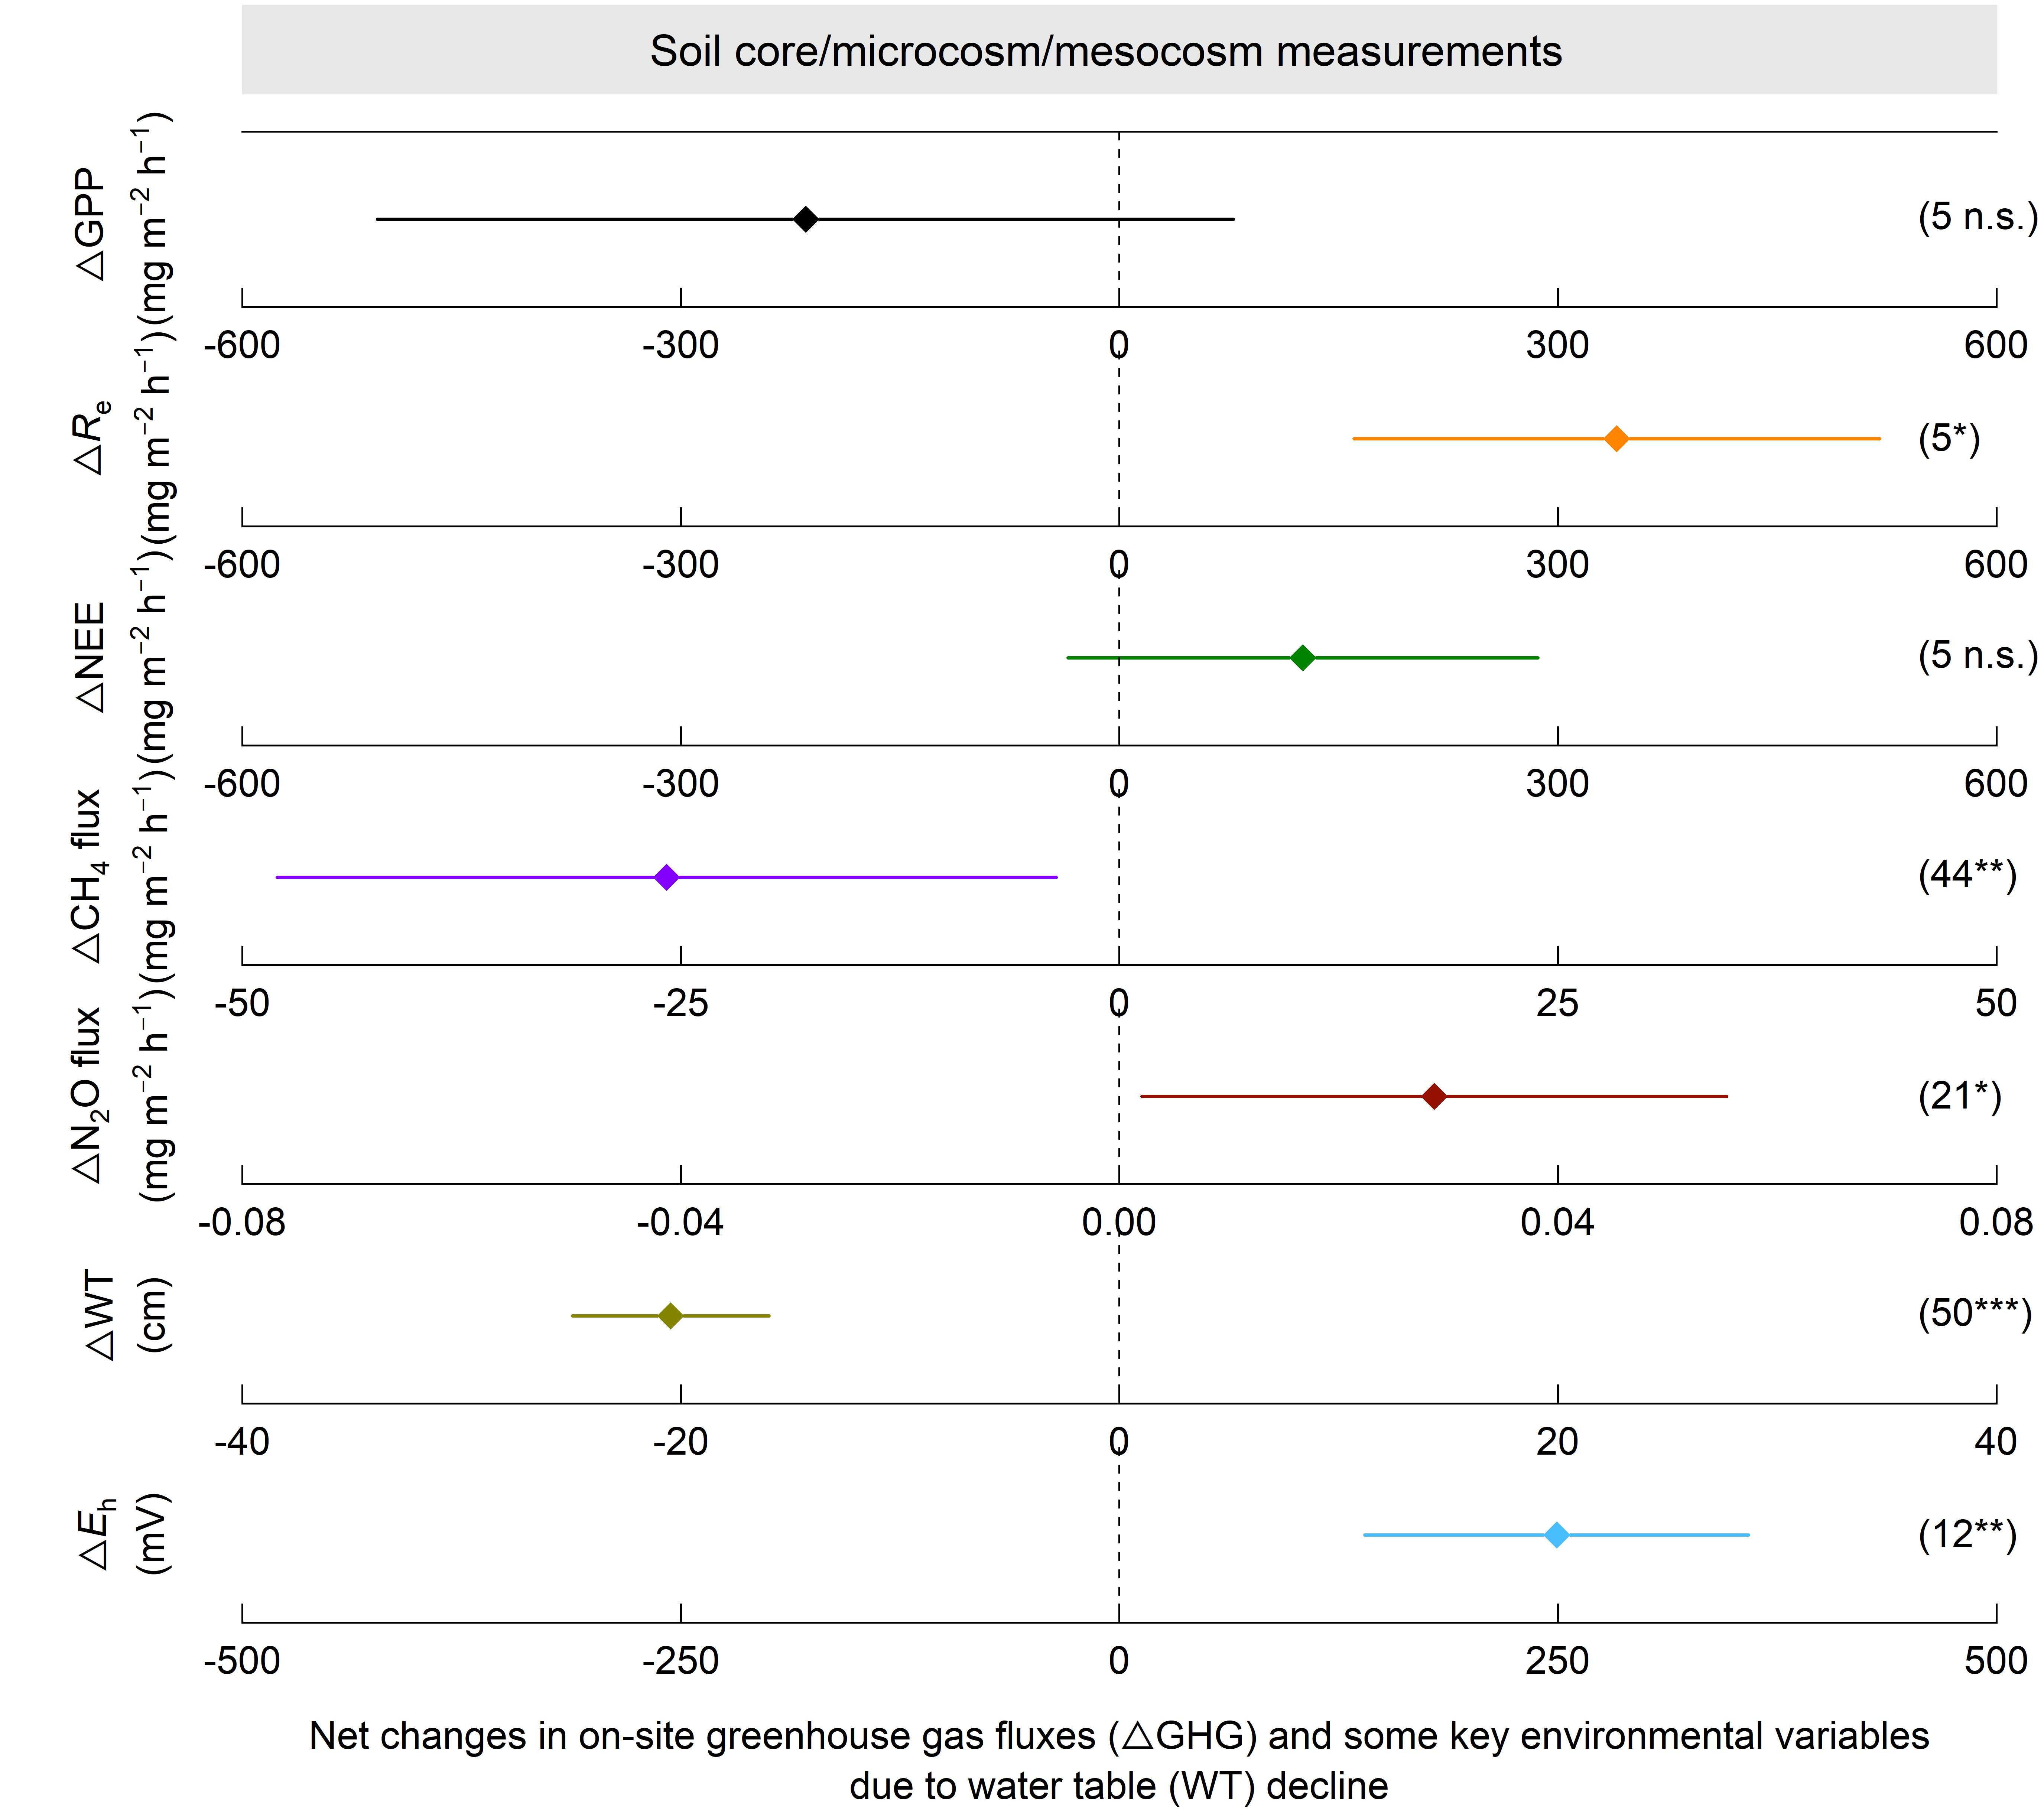


**Extended Data Fig. 1| Net changes in overall greenhouse gas (GHG) fluxes and key environmental factors following water table (WT) decline for soil core measurements.** The net changes of gross primary productivity (GPP), ecosystem respiration (*R*e), net ecosystem exchange of CO2 (NEE), methane (CH4), nitrous oxide (N2O) fluxes, water table (WT) and soil redox potential (*E*h) due to WT decline (i.e., experimental minus pristine, △GPP, △*R*e, △NEE, △CH4 and △N2O, △WT and△*E*h) are presented. The numbers in the brackets indicate the number of available site measurements. The asterisks *, **, *** indicate significance at the levels of *p* < 0.05, 0.01 and 0.001, respectively, and n.s. indicates no significance. Note that negative values for △NEE and △GPP indicate an increased net ecosystem uptake of CO2, while for all other categories, negative values refer to decreases in the relevant flux (*R*e or CH4 and N2O emissions).

# Extended Data Fig. 2


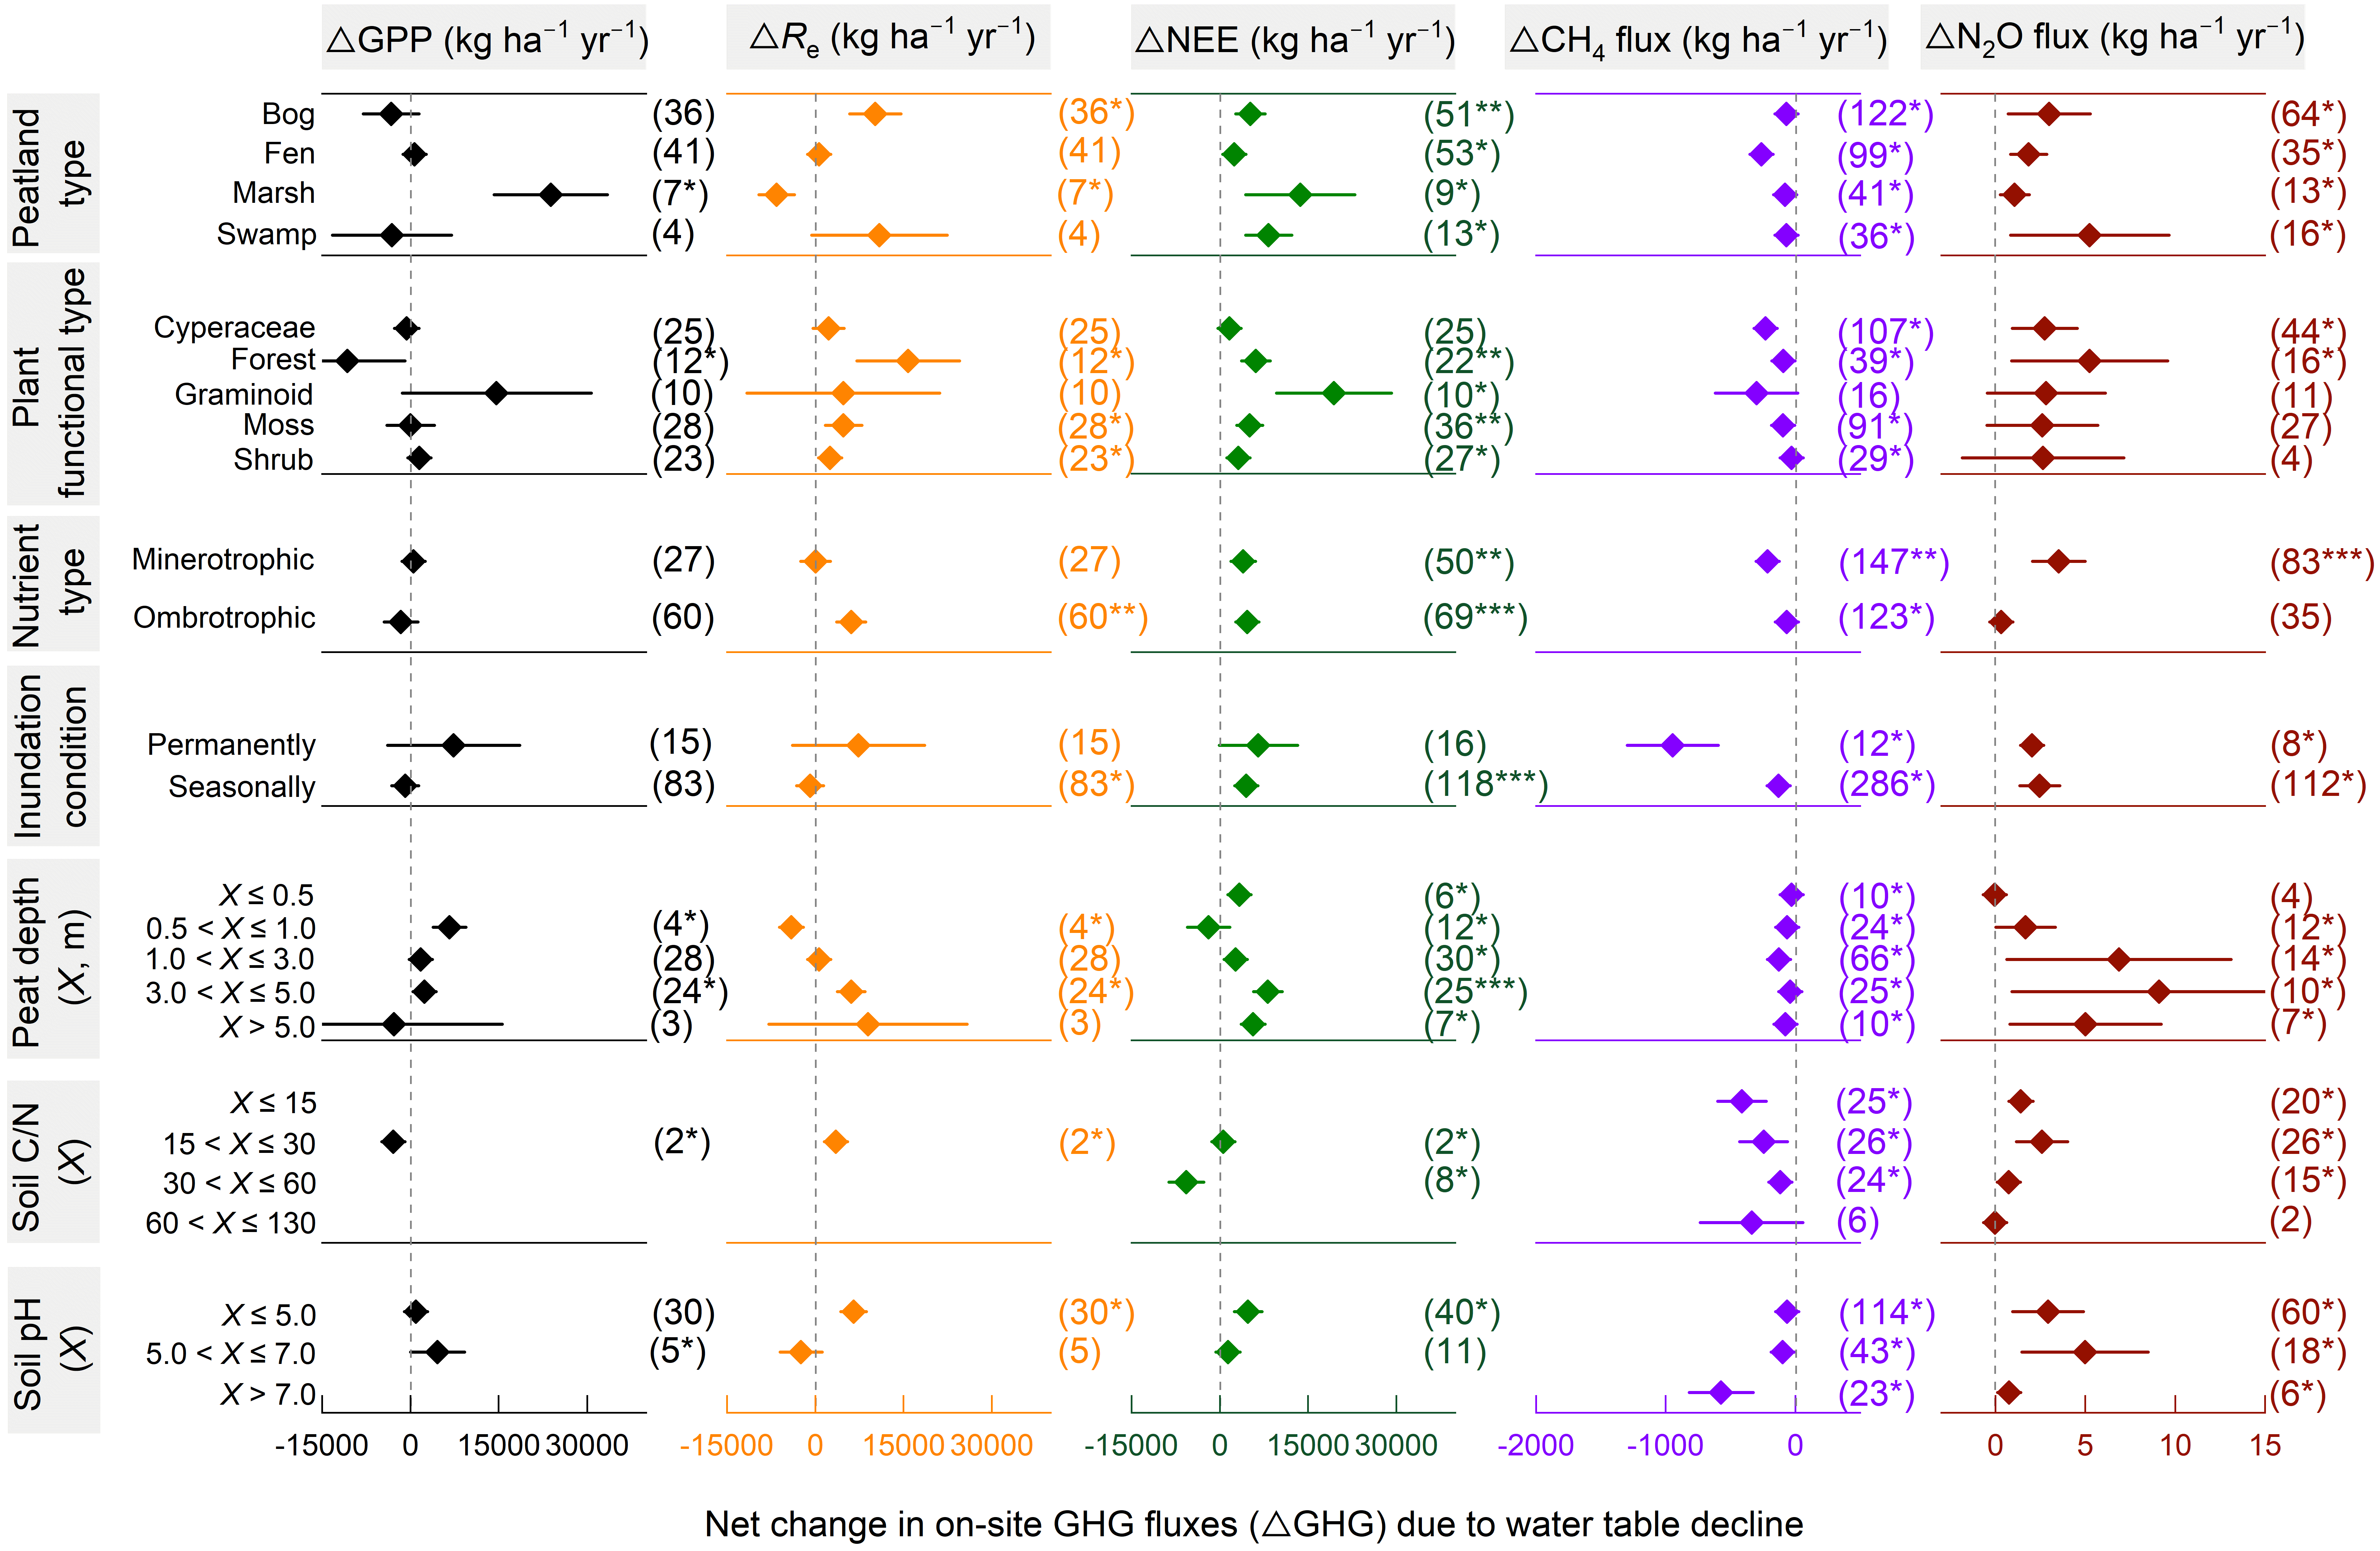


**Extended Data Fig. 2| Net changes in on-site greenhouse gas (GHG) fluxes following water table (WT) decline under different conditions.** The net changes of annual gross primary productivity (GPP), ecosystem respiration (*R*e), net ecosystem exchange of CO2 (NEE), methane (CH4), and nitrous oxide (N2O) fluxes due to WT decline (i.e., experimental minus pristine, △GPP, △*R*e, △NEE, △CH4 and △N2O) are presented. The number in parentheses indicate sample size. The asterisk *, **, *** indicate significance at the level of *p* < 0.05, 0.01 and 0.001, respectively. Note that negative values for △NEE and △GPP indicate increased net ecosystem uptake of CO2, while for all other categories it refers to a decrease of the relevant flux (here *R*e or CH4 and N2O emissions).

# Extended Data Fig. 3


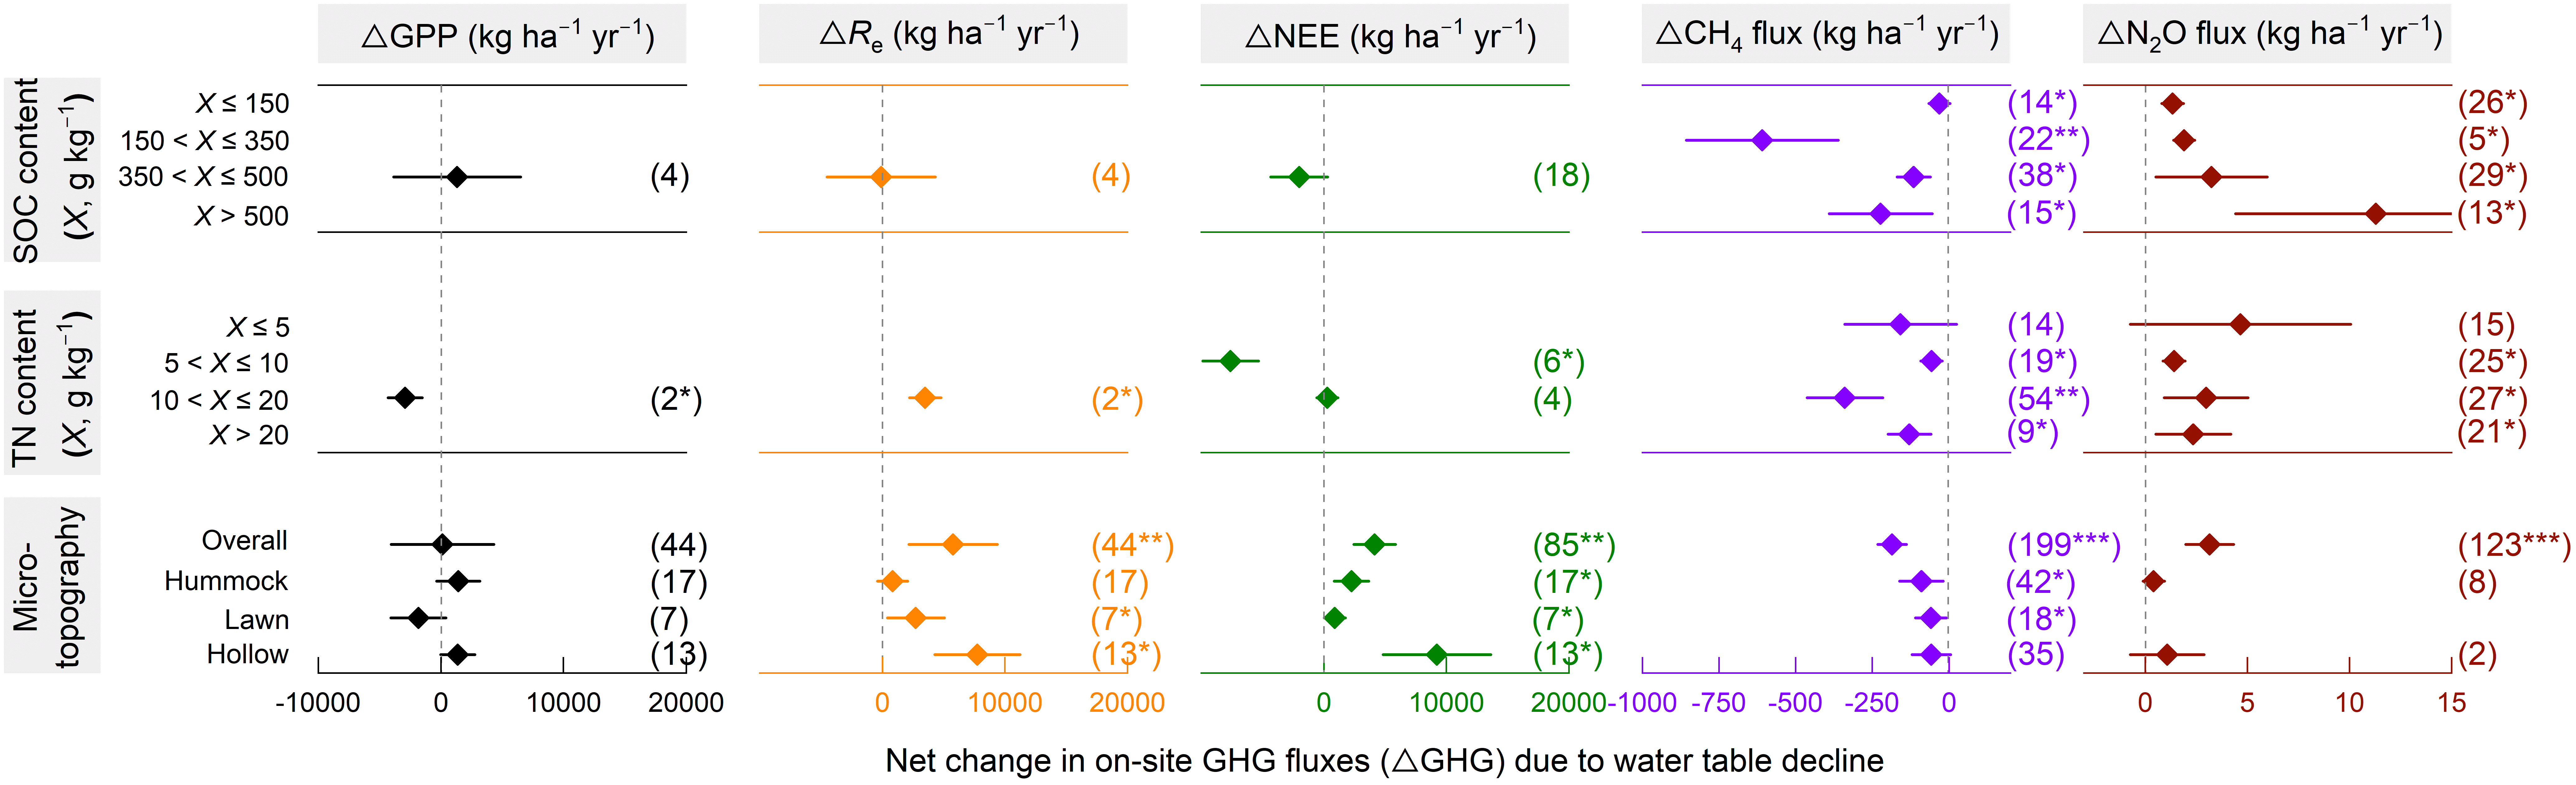


**Extended Data Fig. 3| Net changes in on-site greenhouse gas (GHG) fluxes following water table (WT) decline under different conditions.** The net changes of annual gross primary productivity (GPP), ecosystem respiration (*R*e), net ecosystem exchange of CO2 (NEE), methane (CH4), and nitrous oxide (N2O) fluxes due to WT decline (i.e., experimental minus pristine, △GPP, △*R*e, △NEE, △CH4 and △N2O) are presented. The number in parentheses indicate sample size. The asterisk *, **, *** indicate significance at the level of *p* < 0.05, 0.01 and 0.001, respectively. Note that negative values for △NEE and △GPP indicate increased net ecosystem uptake of CO2, while for all other categories it refers to a decrease of the relevant flux (here *R*e or CH4 and N2O emissions).

# Extended Data Fig. 4


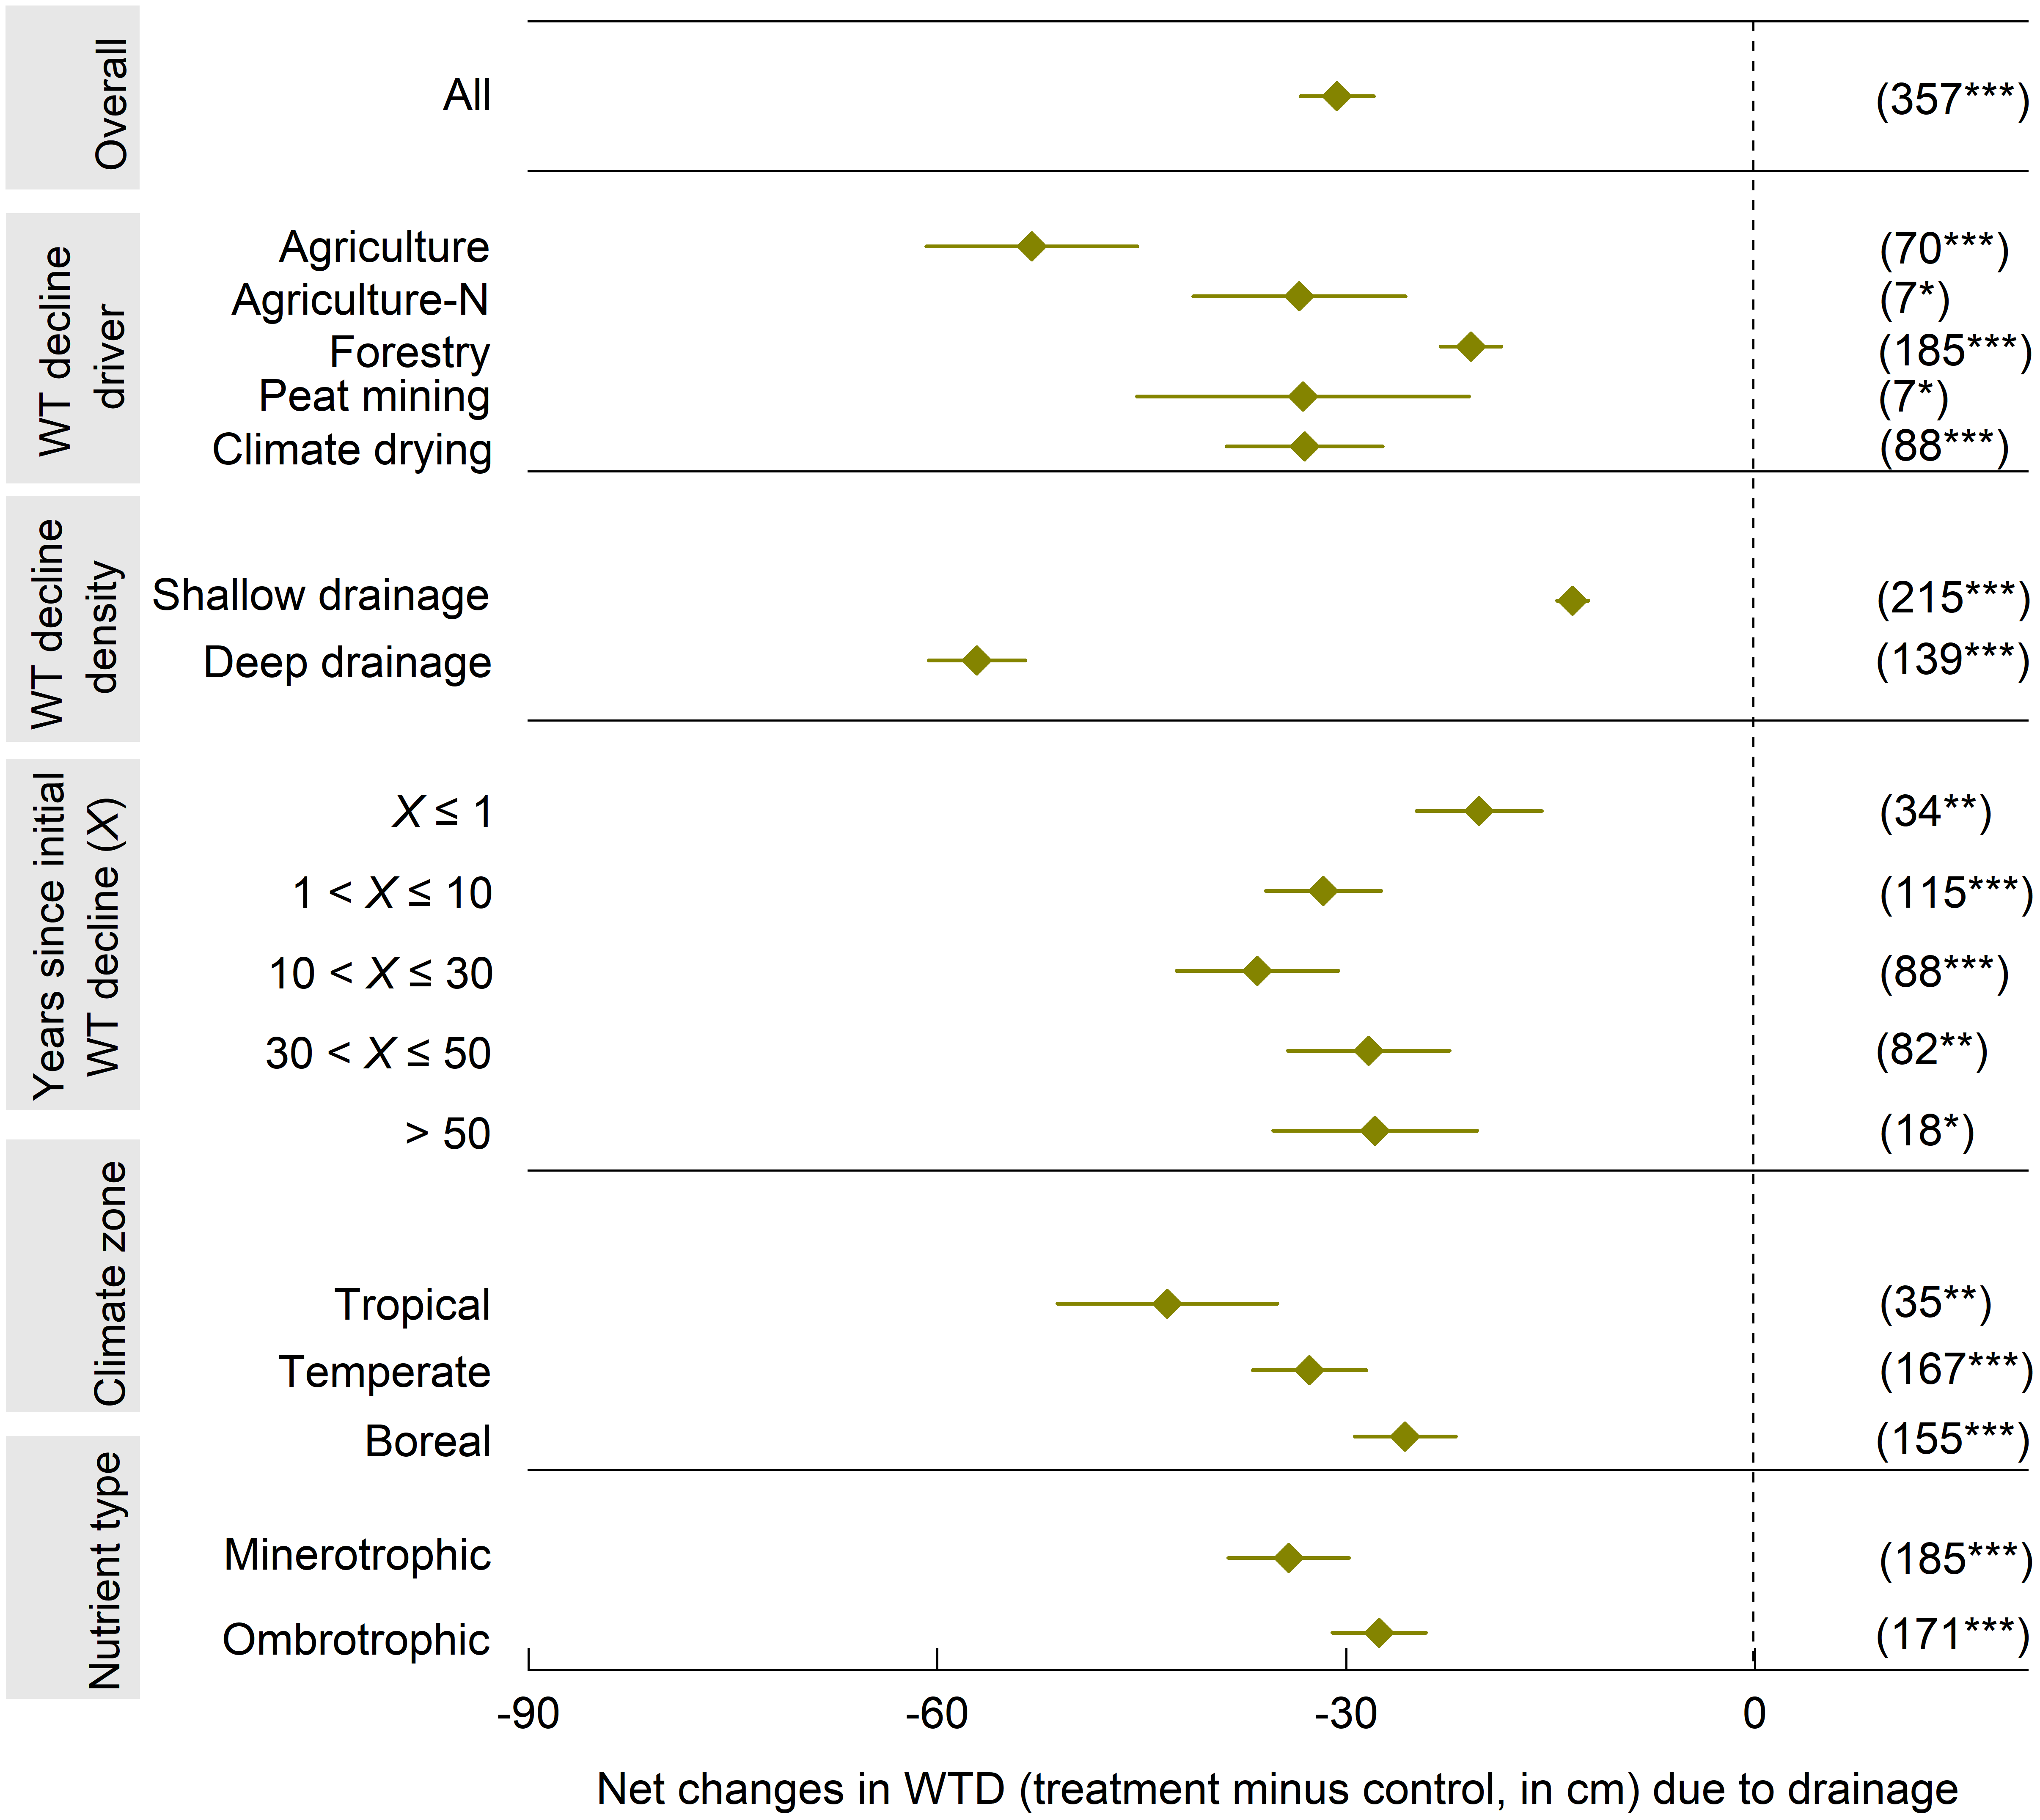


**Extended Data Fig. 4| Net changes in water table depth (WTD) due to drainage.** Agriculture land-use including cropland and grassland. Agriculture-N indicates those received nitrogen fertilization. The numbers in the brackets indicate the number of available site measurements. The asterisks *, **, *** indicate significance at the levels of *p* < 0.05, 0.01 and 0.001, respectively, and n.s. indicates no significance. Note that negative values for △WTD indicate decreases in the water table.

# Extended Data Fig. 5


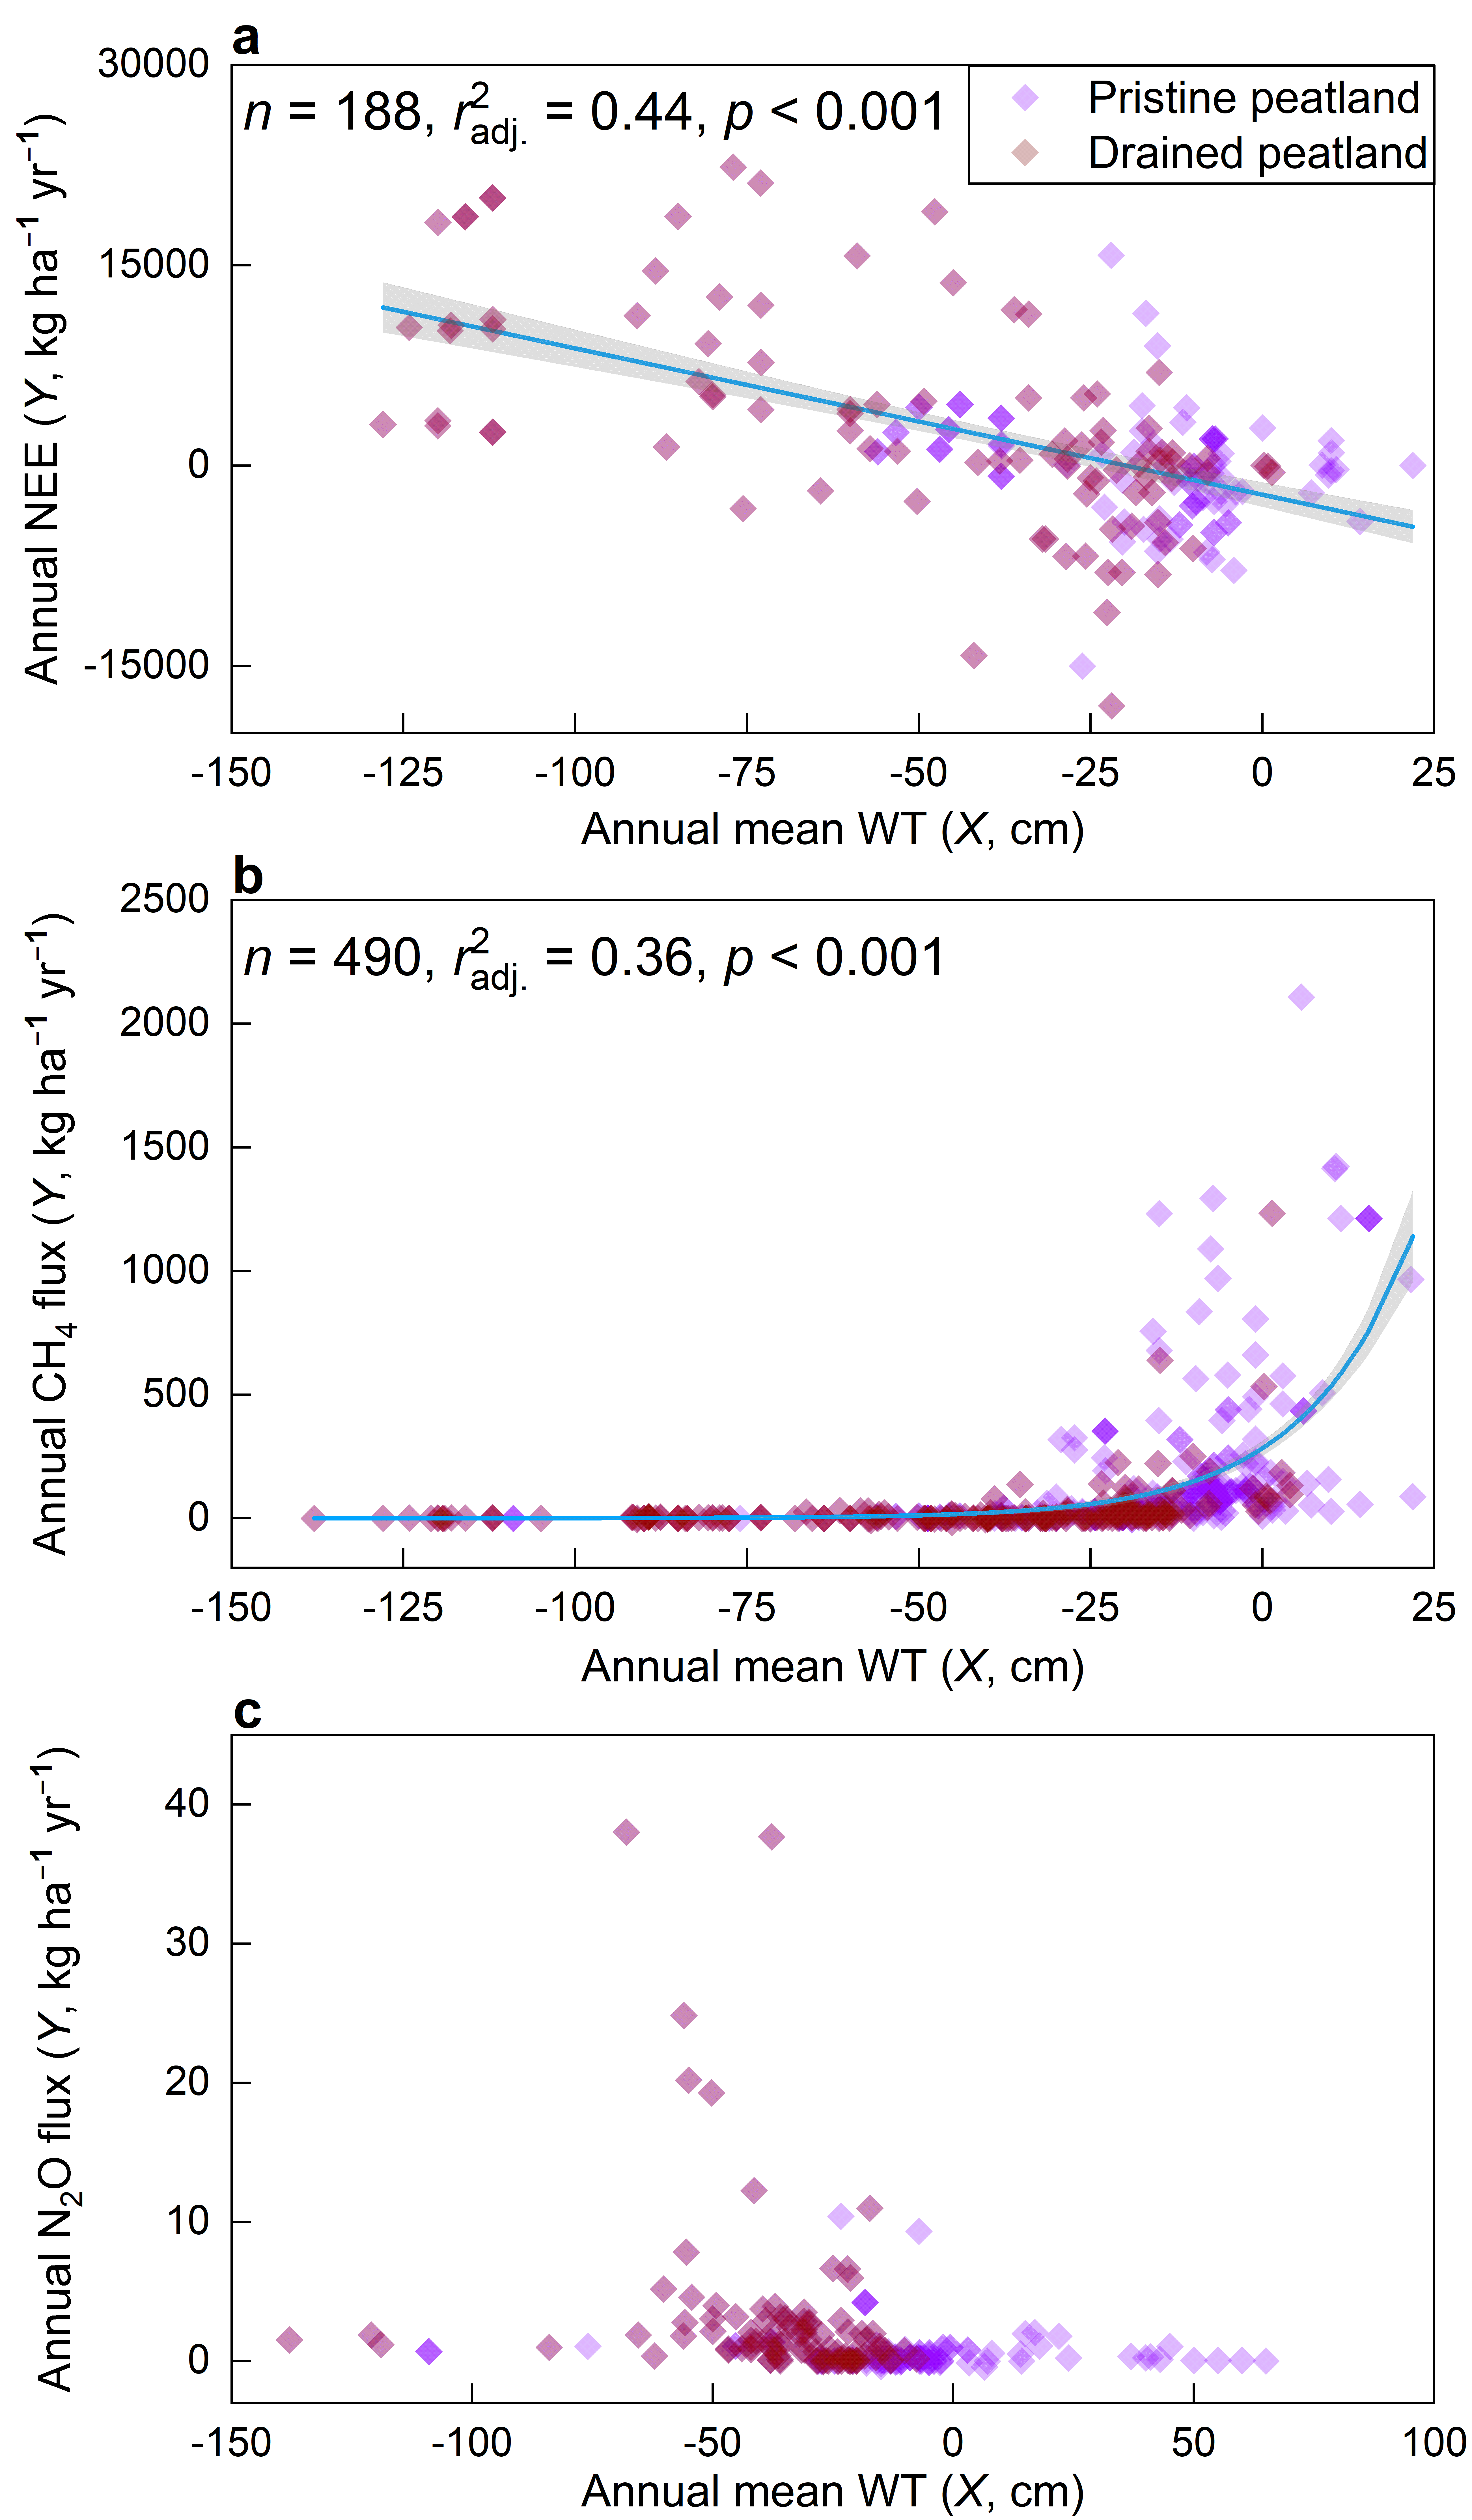


**Extended Data Fig. 5| Controls of annual mean water table (WT) on on-site annual net ecosystem exchange in CO2 (NEE) (a), CH4 (b) and N2O (c) fluxes across the pristine and drained peatlands.** Given shaded areas indicate the 95% confidence intervals.

# Extended Data Fig. 6


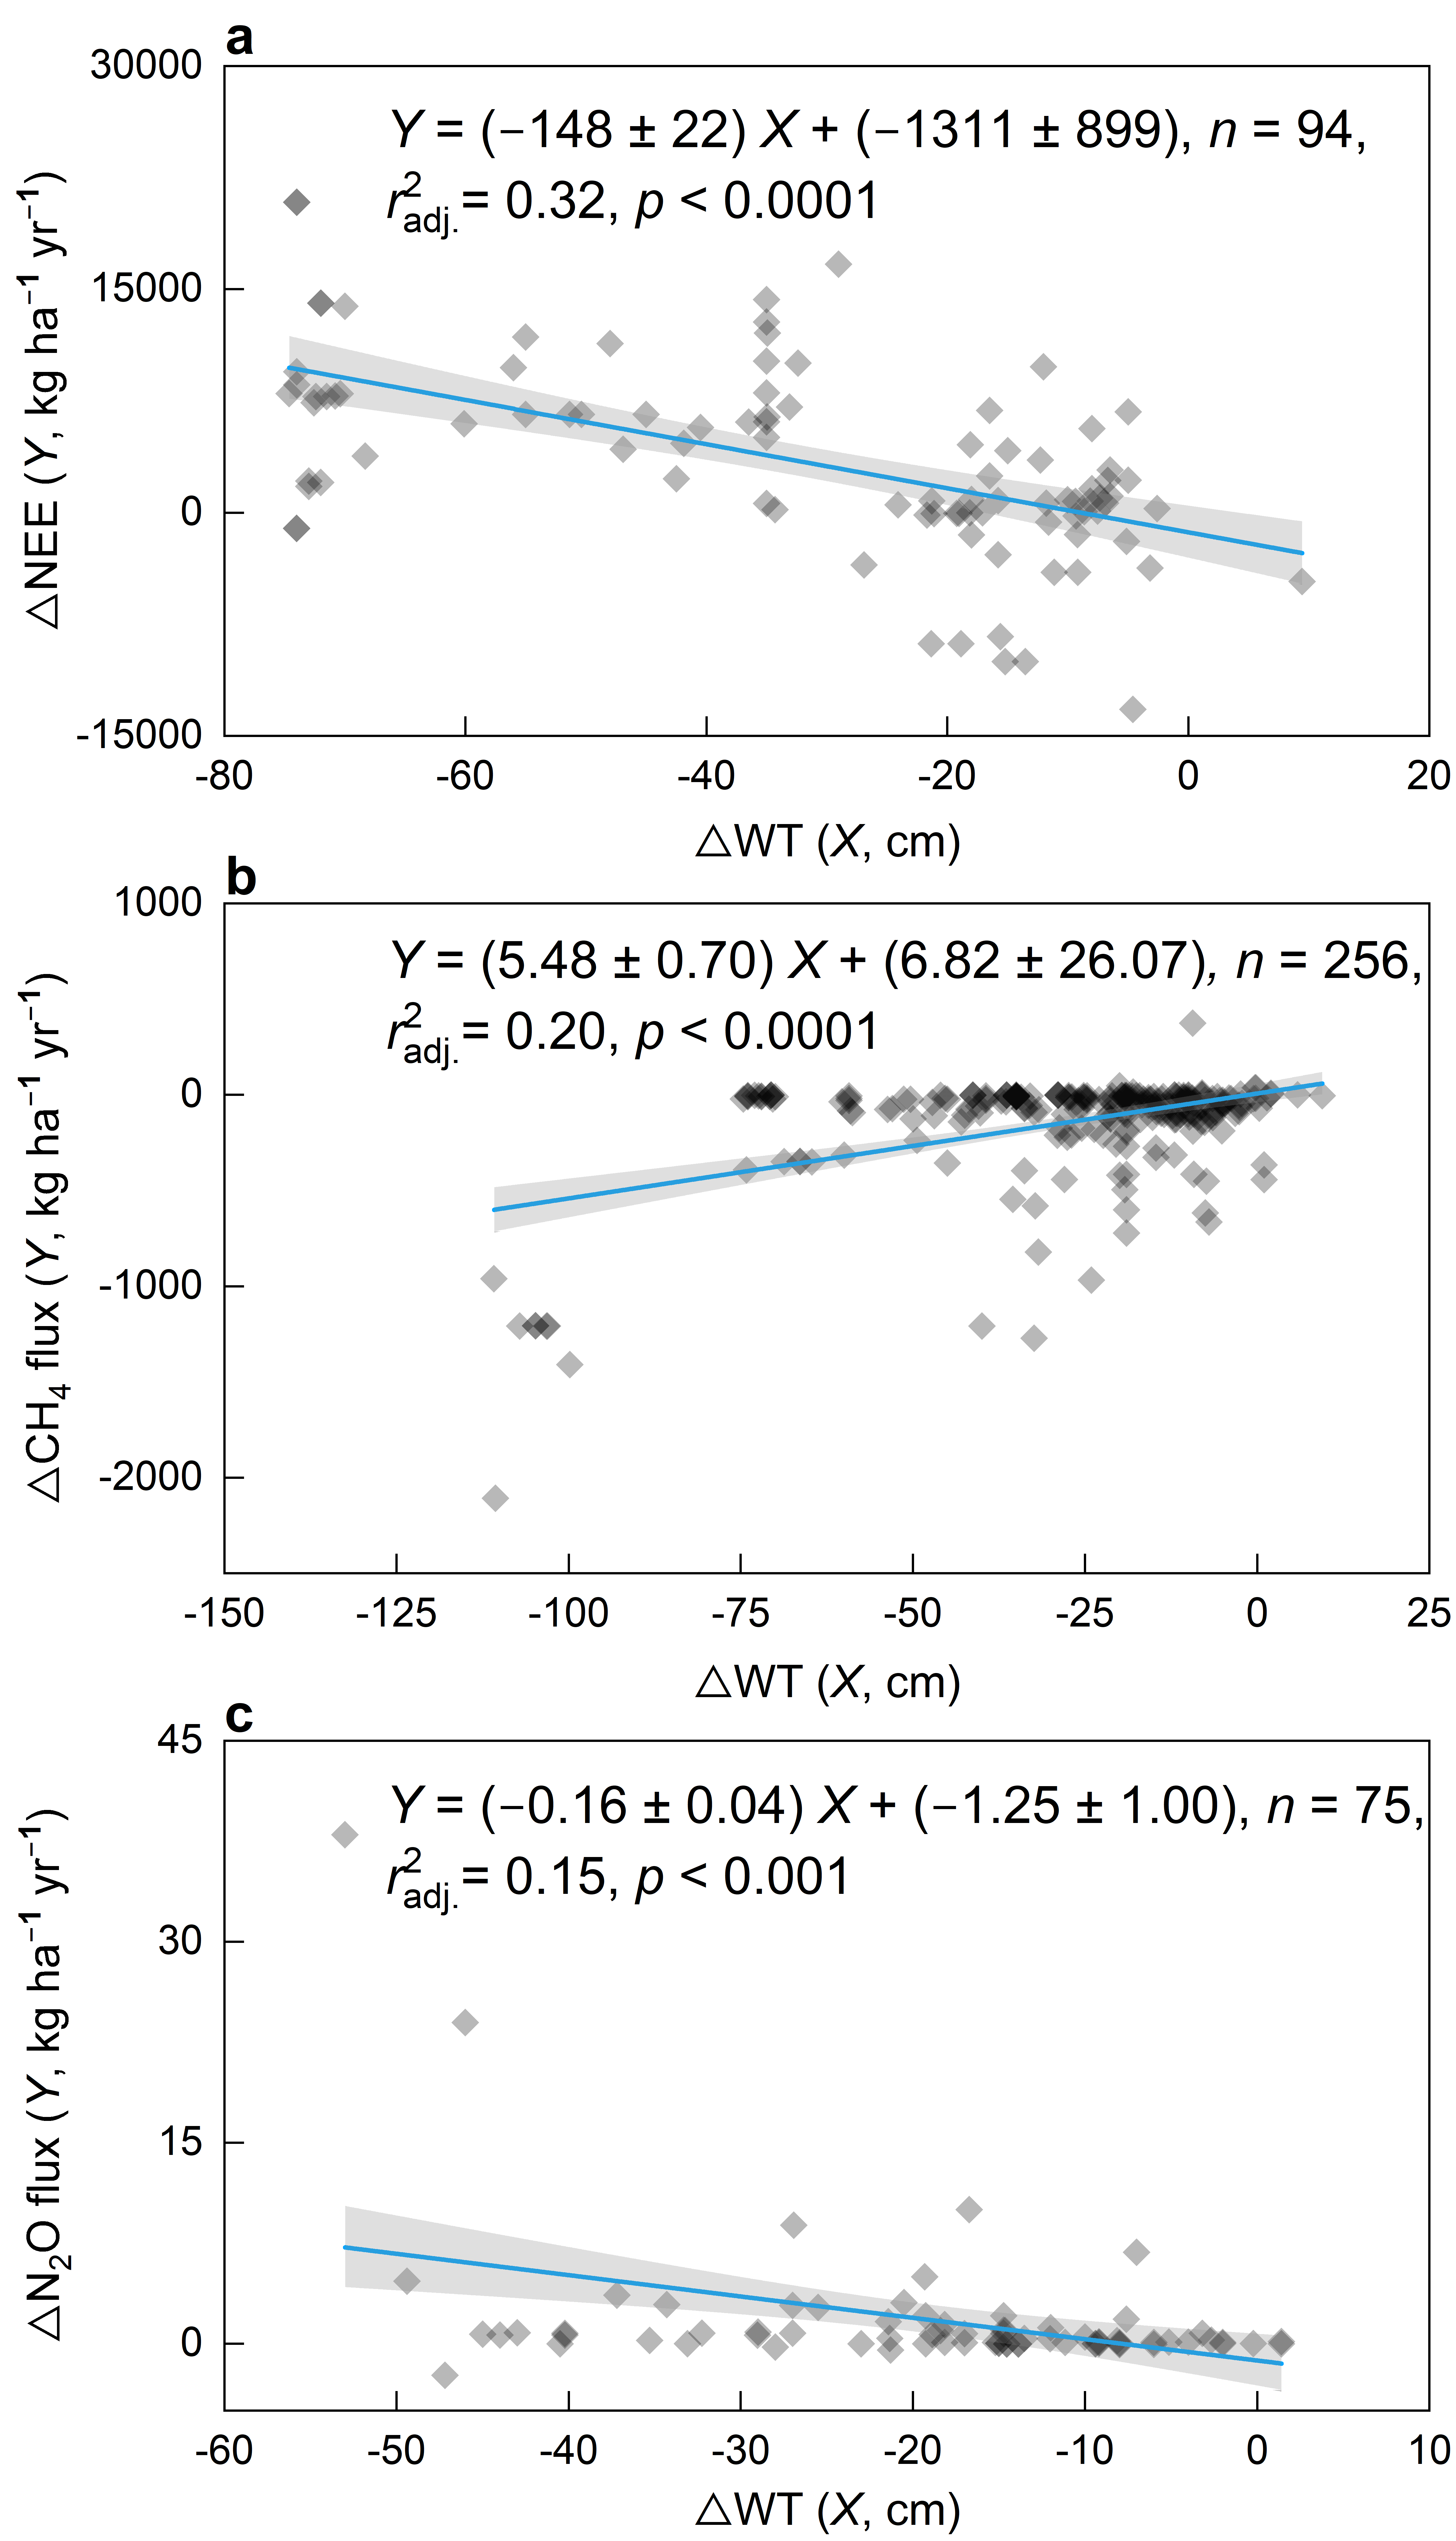


**Extended Data Fig. 6| Controls of net changes in annual mean water table (△WT) on net changes in on-site annual net ecosystem exchange of CO2 (△NEE) (A), CH4 (△CH4, B) and N2O (△N2O, C) fluxes due to WT decline.** Given shaded areas indicate the 95% confidence intervals.

# Extended Data Fig. 7


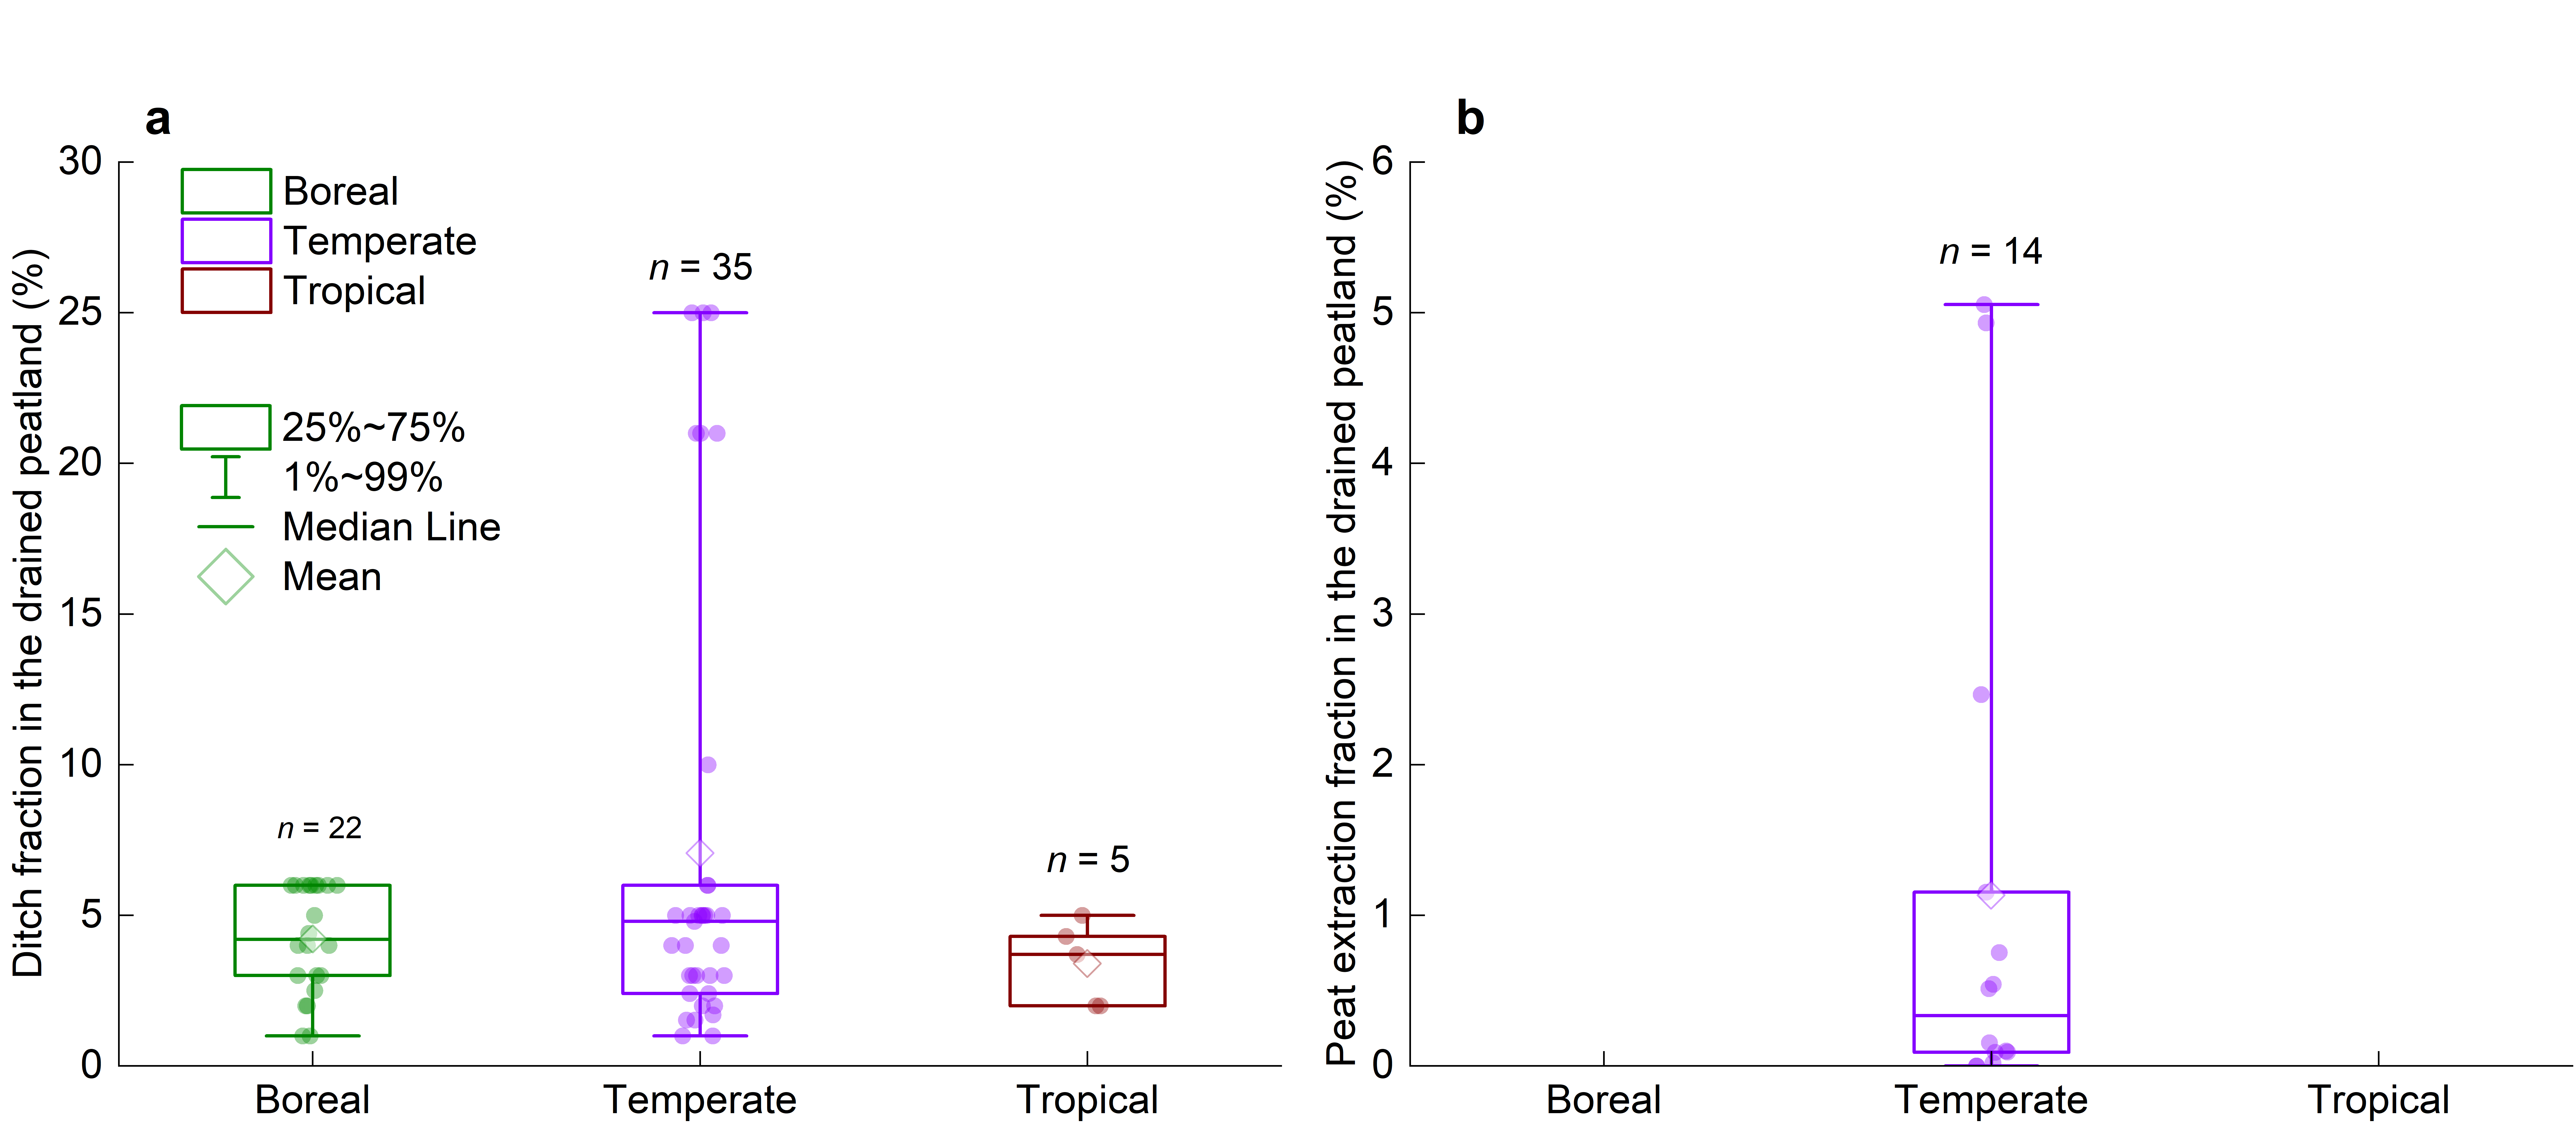


**Extended Data Fig. 7| Box scatterplot of drainage ditch area fraction (%) (a) and peat extraction area fraction (%) (b) in the drained peatlands. a-b** information is used for estimating the area-weighted (weighted by on- and off-site) annual net greenhouse gas fluxes by drainage activities. Note that these fraction observations are categorized by only climate zone, as lacking enough measurements for further classifying by land-use.

# Extended Data Fig. 8


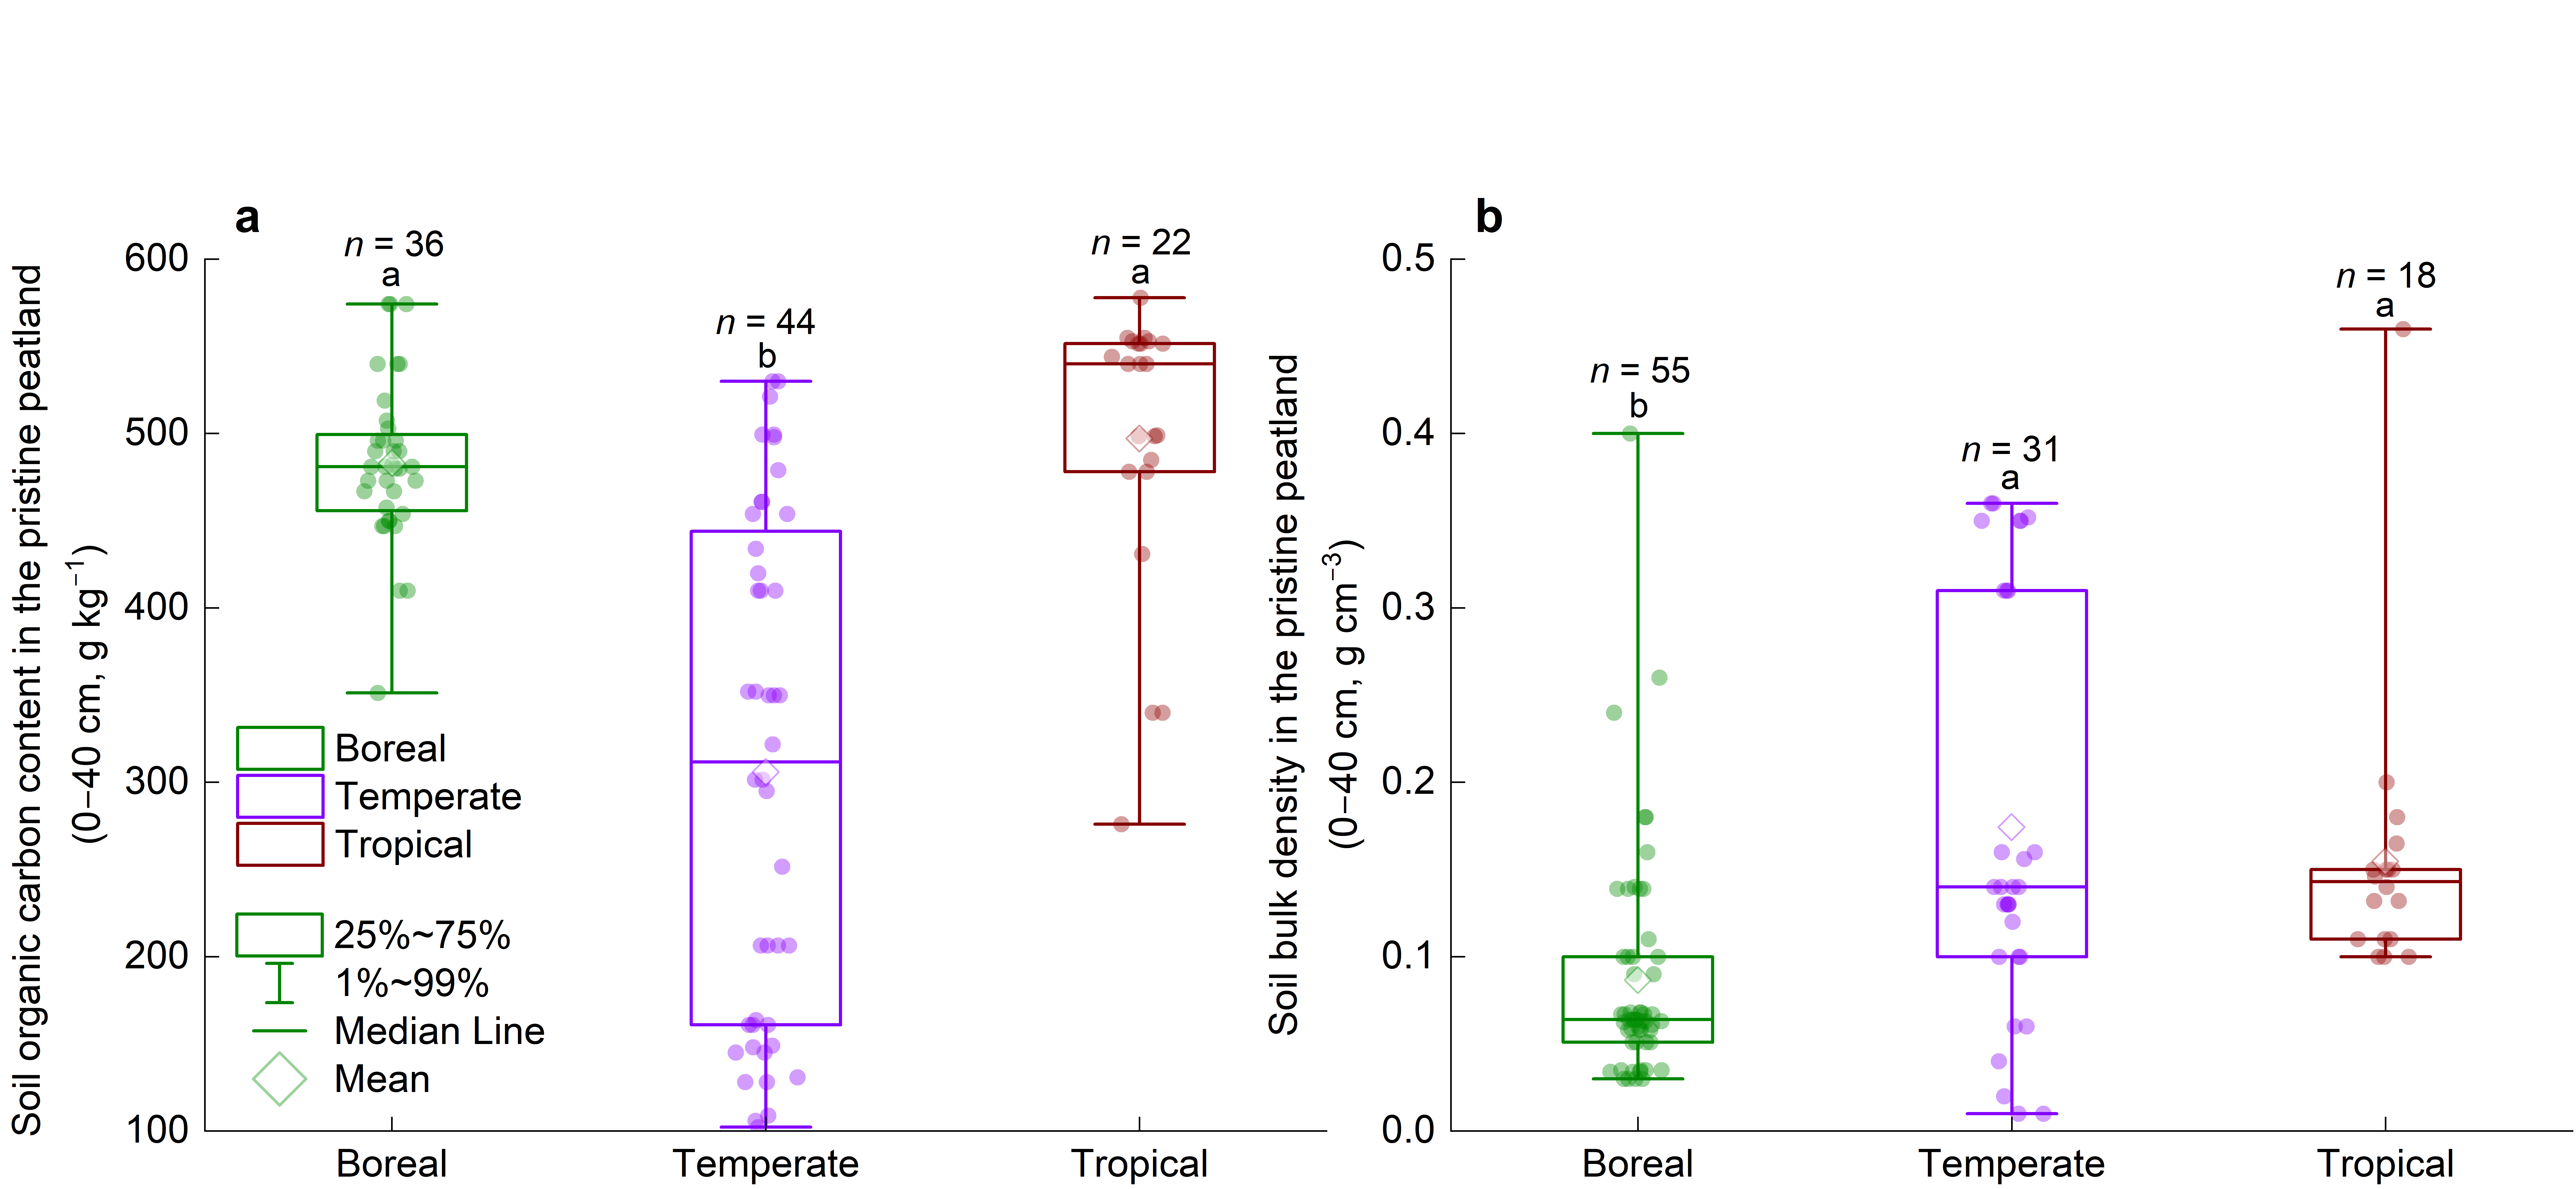


**Extended Data Fig. 8| Box scatterplot soil (0–40 cm) organic carbon content (g kg–1) (a) and bulk density (g cm–3) (b) in the pristine peatlands in different climate zones. a-b** information is used for estimating the soil organic carbon loss through peat extraction.

# Extended Data Fig. 9


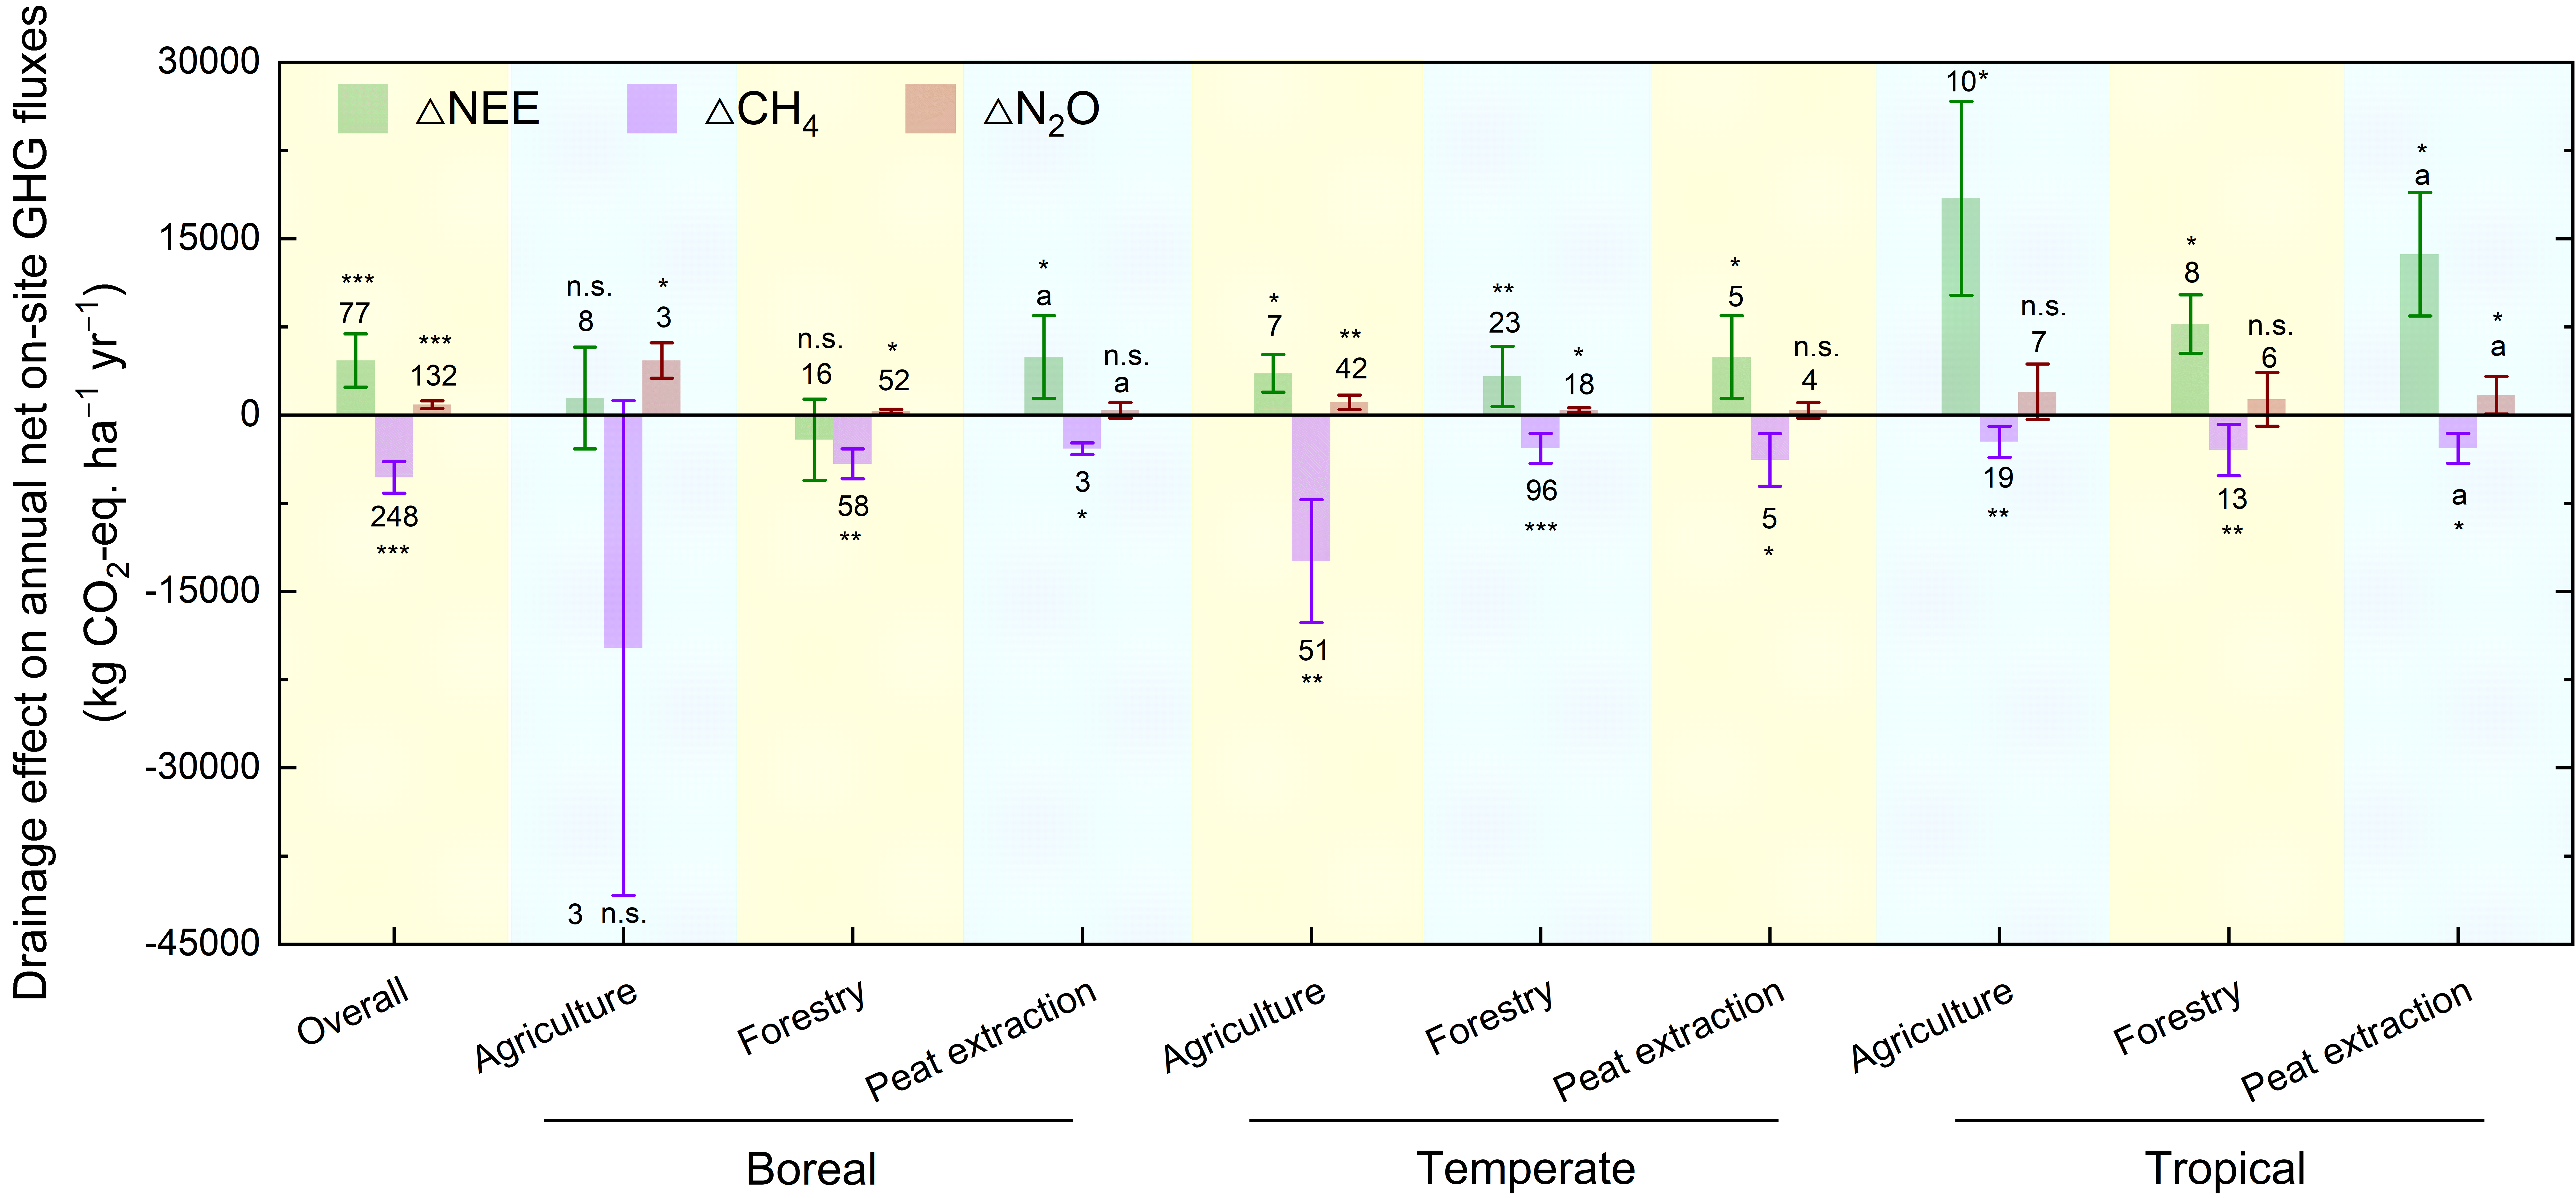


**Extended Data Fig. 9|** **Net changes in** **on-site annual greenhouse gas (GHG) fluxes due to drainage for each climate and land use category.** The net changes of annual net ecosystem exchange of CO2 (△NEE), methane (△CH4), and nitrous oxide (△N2O) fluxes due to WT decline by drainage (i.e., drainage minus pristine,△NEE, △CH4 and △N2O) are presented. To increase sample sizes for agriculture land-use, measurements with and without fertilization are combined. The number indicate sample size. The asterisk *, **, *** indicate significance at the level of *p* < 0.05, 0.01 and 0.001, respectively, and n.s. indicates no significance. Note that negative values for △NEE indicate increased net ecosystem uptake of CO2, while for all other categories it refers to a decrease of the relevant flux (here CH4 and N2O emissions). CH4 and N2O fluxes are converted to CO2-eq. using respective global warming potentials of 34 (CH4) and 298 (N2O)8.

# Extended Data Fig. 10


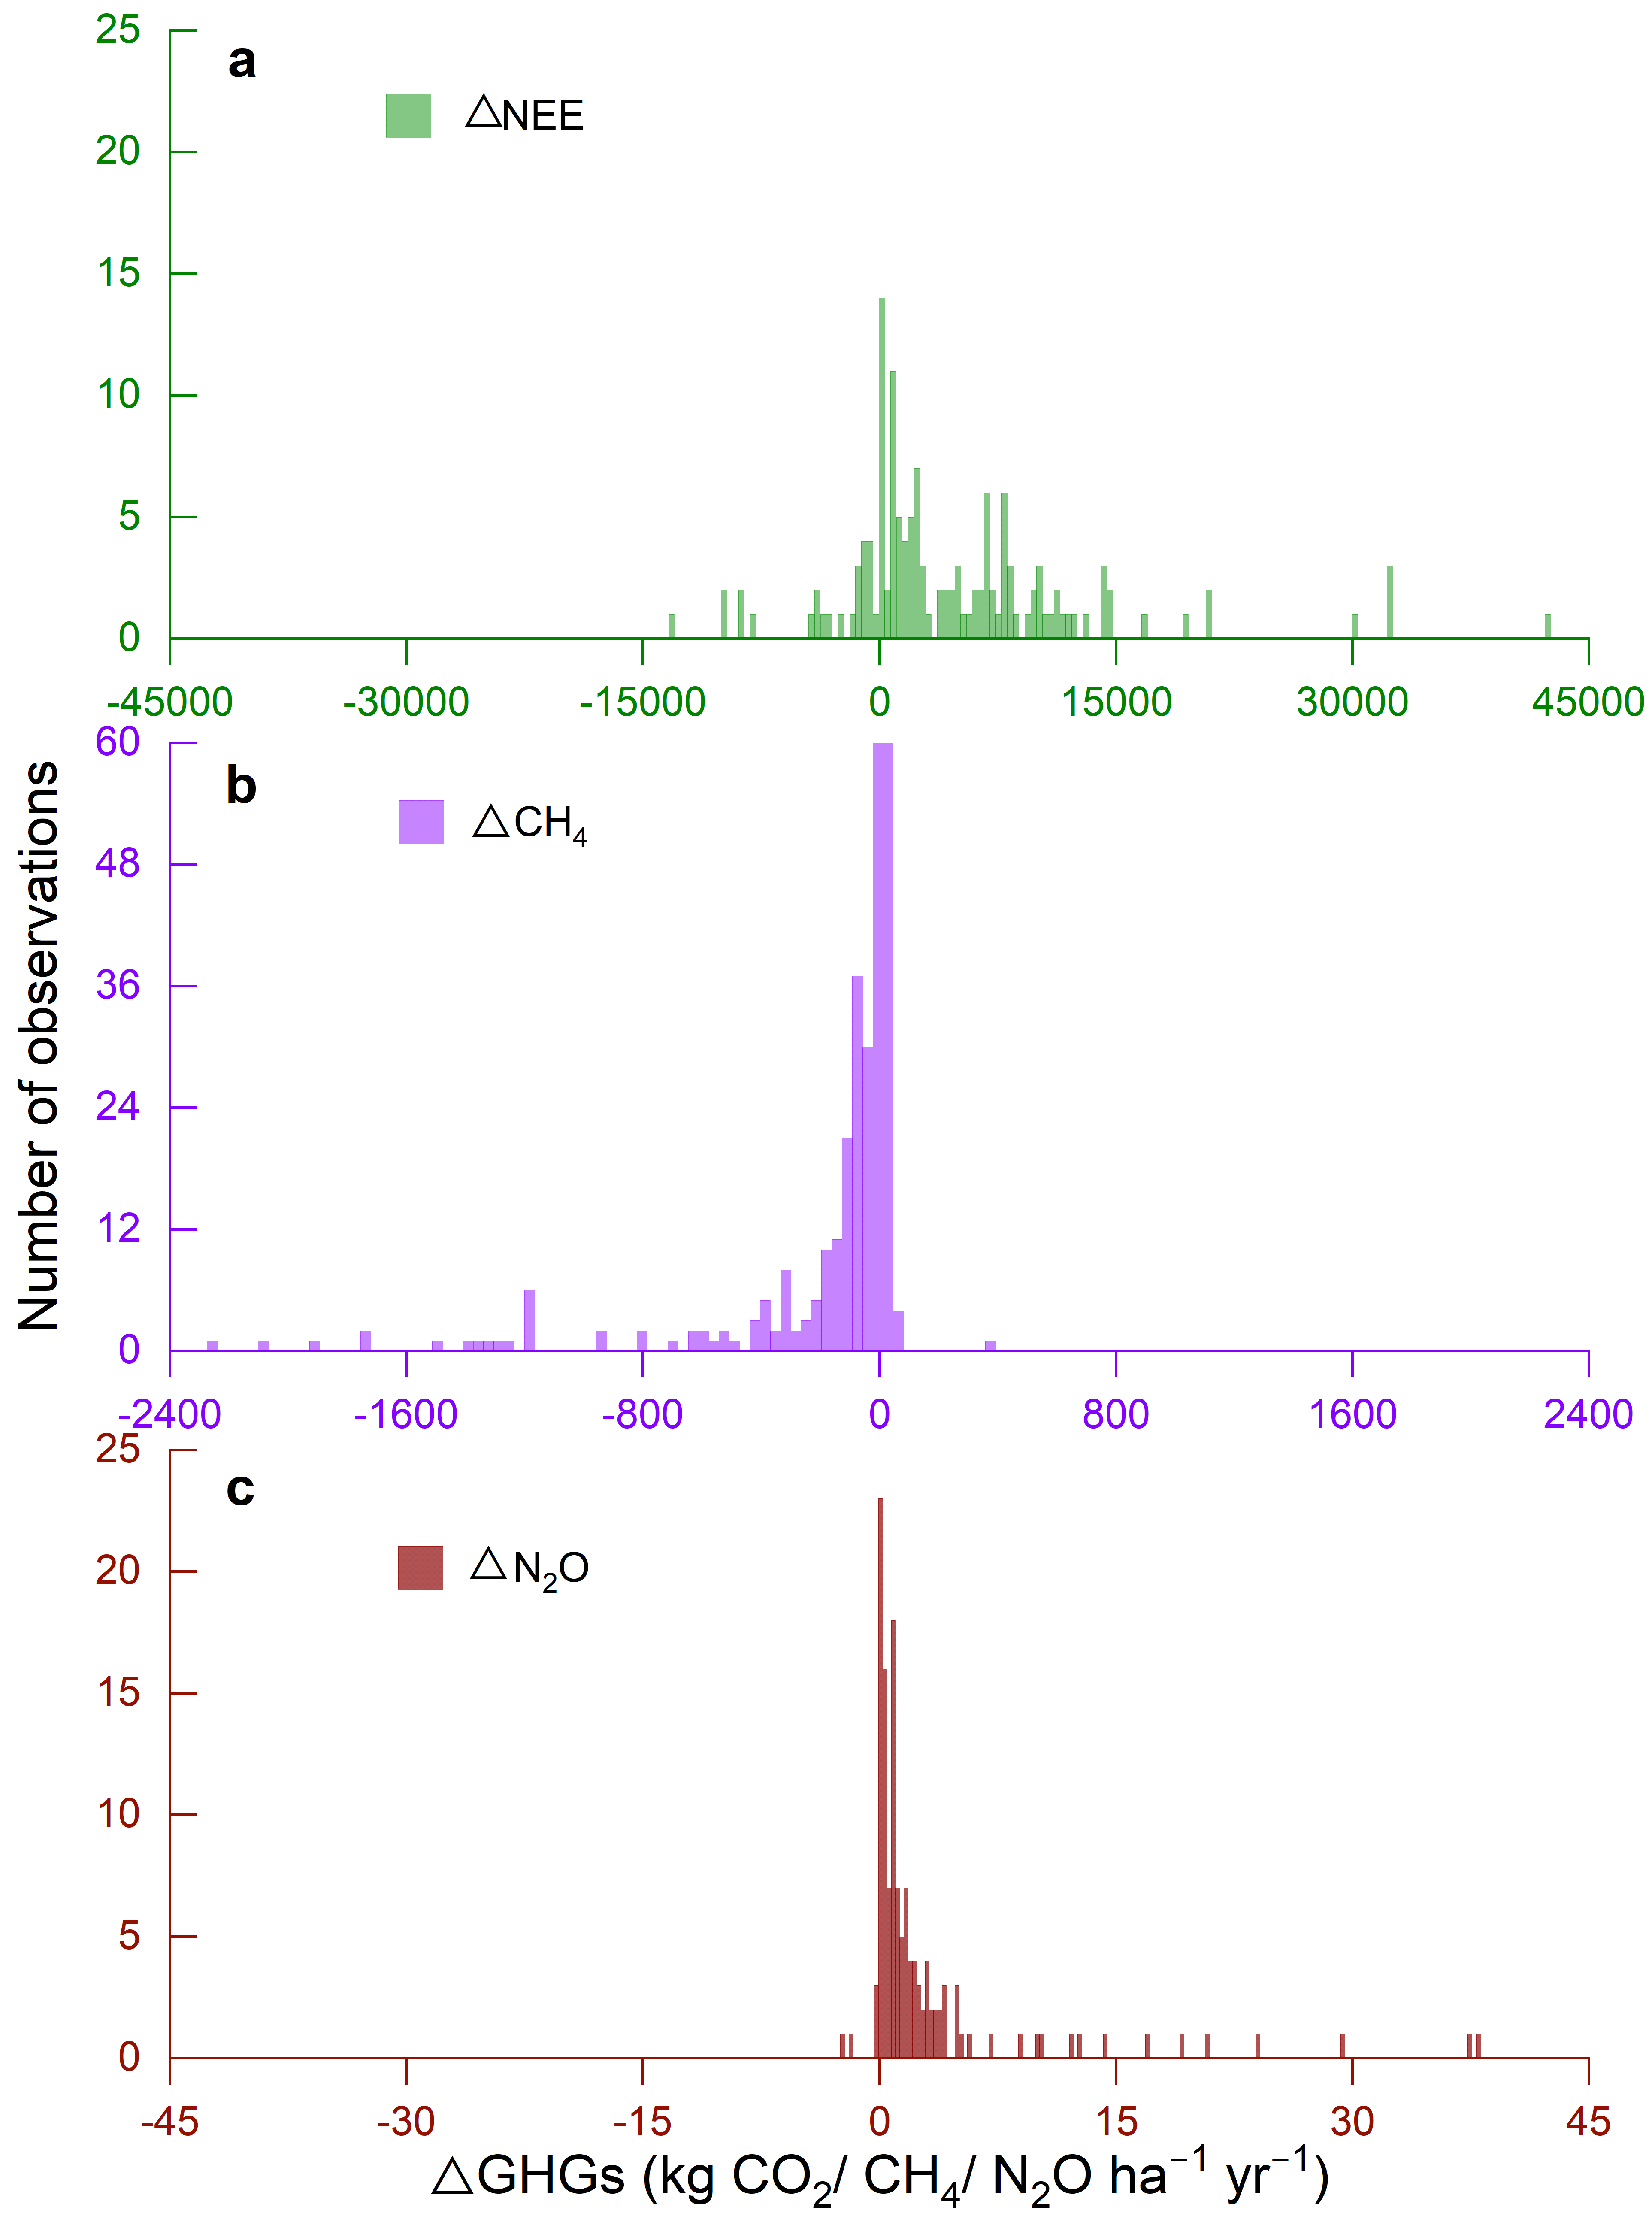


**Extended Data Fig. 10| Number of observations reporting net changes of annual CO2 (as net ecosystem exchange [NEE]), CH4 and N2O fluxes due to WT decline (****△= WT decline – undisturbed [control]. a,** △NEE; **b,** △CH4; **c,** △N2O.

# **Meta-analysis References**

Adji, F. F., Hamada, Y., Darang, U., Limin, S. H. & Hatano, R. (2014). Effect of plant-mediated oxygen supply and drainage on greenhouse gas emission from a tropical peatland in Central Kalimantan, Indonesia. *Soil Science and Plant Nutrition*, 60, 216–230. https://doi.org/10.1080/00380768.2013.872019

Aerts, R. & Ludwig, F. (1997). Water-table changes and nutritional status affect trace gas emissions from laboratory columns of peatland soils. *Soil Biology and Biochemistry*, 29, 1691–1698. https://doi.org/10.1016/S0038-0717(97)00074-6

Alm, J., Saarnio, S., Nykänen, H., Silvola, J. & Martikainen, P. J. (1999). Winter CO2, CH4 and N2O fluxes on some natural and drained boreal peatlands. *Biogeochemistry*, 44, 163–186. <https://doi.org/10.1007/bf00992977>

Arai, H., Hadi, A., Darung, U., Limin, S. H., Hatano, R. & Inubushi, K. (2014b). A methanotrophic community in a tropical peatland is unaffected by drainage and forest fires in a tropical peat soil. *Soil Science and Plant Nutrition*, 60, 577–585. https://doi.org/10.1080/00380768.2014.922034

Arai, H., Hadi, A., Darung, U., Limin, S. H., Takahashi, H., Hatano, R. & Inubushi, K. (2014a). Land use change affects microbial biomass and fluxes of carbon dioxide and nitrous oxide in tropical peatlands. *Soil Science and Plant Nutrition*, 60, 423–434. https://doi.org/10.1080/00380768.2014.903576

Arnold, K. V., Nilsson, M., Hånell, B., Weslien, P. & Klemedtsson, L. (2005a). Fluxes of CO2, CH4 and N2O from drained organic soils in deciduous forests. *Soil Biology and Biochemistry*, 37, 1059–1071. https://doi.org/10.1016/j.soilbio.2004.11.004

Arnold, K. V., Weslien, P., Nilsson, M., Svensson, B. H. & Klemedtsson, L. (2005b). Fluxes of CO2, CH4 and N2O from drained coniferous forests on organic soils. *Forest Ecology and Management*, 210, 239–254. https://doi.org/10.1016/j.foreco.2005.02.031

Ballantyne, D. M., Hribljan, J. A., Pypker, T. G. & Chimner, R. A. (2014). Long-term water table manipulations alter peatland gaseous carbon fluxes in Northern Michigan. *Wetland Ecology and Management*, 22, 35–47. https://doi.org/10.1007/s11273-013-9320-8

Berryman, E. M., Venterea, R. T., Baker, J. M., Bloom, P. R. & Elf, B. (2009). Phosphorus and greenhouse gas dynamics in a drained calcareous wetland soil in Minnesota. *Journal of Environmental Quality*, 38, 2147–2158. https://doi.org/10.2134/jeq2008.0409

Blodau, C. & Moore, T. R. (2003). Experimental response of peatland carbon dynamics to a water table fluctuation. *Aquatic Sciences*, 65, 47–62. https://doi.org/10.1007/s000270300004

Cao, R., Chen, Y., Wu, X., Zhou, Q. & Sun, S. (2018). The effect of drainage on CO2, CH4 and N2O emissions in the Zoige peatland a 40-month *in situ* study. *Mires and Peat*, 21, 1–15. https://doi.org/10.19189/MaP.2017.OMB.292

Cao, R., Xi, X., Yang, Y., Wei, X., Wu, X. & Sun, S. (2017). The effect of water table decline on soil CO2 emission of Zoige peatland on eastern Tibetan Plateau: A four-year in situ experimental drainage. *Applied Soil Ecology* 120, 55–61. https://doi.org/10.1016/j.apsoil.2017.07.036

Carter, M. S., Larsen, K. S., Emmett, B., Estiarte, M., Field, C., Leith, I. D., Lund, M., Meijide, A., Mills, R. T. E., Niinemets, Ü., Peñuelas, J., Portillo-Estrada, M., Schmidt, I. K., Selsted, M. B., Sheppard, L. J., Sowerby, A., Tietema, A. & Beier, C. (2012). Synthesizing greenhouse gas fluxes across nine European peatlands and shrublands–responses to climatic and environmental changes. *Biogeosciences*, 9, 3739–3755. https://doi.org/10.5194/bg-9-3739-2012

Chimner, R. A. & J., C. D. (2003). Influence of water table levels on CO2 emissions in a Colorado subalpine fen: an in situ microcosm study. *Soil Biology and Biochemistry*, 35, 345–351. https://doi.org/10.1016/S0038-0717(02)00284-5

Chimner, R. A., Pypker, T. G., Hribljan, J. A., Moore, P. A. & Waddington, J. M. (2016). Multi-decadal changes in water table levels alter peatland carbon cycling. *Ecosystems*, https://doi.org/10.1007/s10021-016-0092-x

Chivers, M. R., Turetsky, M. R., Waddington, J. M., Harden, J. W. & McGuire, A. D. (2009). Effects of Experimental Water Table and Temperature Manipulations on Ecosystem CO2 Fluxes in an Alaskan Rich Fen. *Ecosystems*, 12, 1329–1342. https://doi.org/10.1007/s10021-009-9292-y

Cooper, H. V., Evers, S., Aplin, P., Crout, N., Dahalan, M. P. B. & Sjogersten, S. (2020). Greenhouse gas emissions resulting from conversion of peat swamp forest to oil palm plantation. *Nature Communications*, 11. https://doi.org/10.1038/s41467-020-14298-w

Danevčič, T., Mandic-Mulec, I., Stres, B., Stopar, D. & Hacin, J. (2010). Emissions of CO2, CH4 and N2O from Southern European peatlands. *Soil Biology and Biochemistry*, 42, 1437–1446. https://doi.org/10.1016/j.soilbio.2010.05.004

Deng, J., Li, C. & Frolking, S. (2015). Modeling impacts of changes in temperature and water table on C gas fluxes in an Alaskan peatland. *Journal of Geophysical Research: Biogeosciences*, 120, 1275–1295. <https://doi.org/10.1002/2014JG002880>

Deshmukh, C. S. et al. Conservation slows down emission increase from a tropical peatland in Indonesia. *Nat. Geosci.* 14, 484–490, (2021).

Deshmukh, C. S. et al. Net greenhouse gas balance of fibre wood plantation on peat in Indonesia. *Nature* (2023). https://doi.org/10.1038/s41586-023-05860-9

Dhandapani, S., Ritz, K., Evers, S., Yule, C. M. & Sjögersten, S. (2019). Are secondary forests second-rate? Comparing peatland greenhouse gas emissions, chemical and microbial community properties between primary and secondary forests in Peninsular Malaysia. *Science of the Total Environment*, 655, 220–231. https://doi.org/10.1016/j.scitotenv.2018.11.046

Dommain, R., Frolking, S., Jeltsch‐Thömmes, A., Joos, F., Couwenberg, J. & Glaser, P. H. (2018). A radiative forcing analysis of tropical peatlands before and after their conversion to agricultural plantations. *Global Change Biology*, 24, 5518–5533. https://doi.org/10.1111/gcb.14400

Dowrick, D. J., Freeman, C., Lock, M. A. & Reynolds, B. (2006). Sulphate reduction and the suppression of peatland methane emissions following summer drought. *Geoderma*, 132, 384-390. https://doi.org/10.1016/j.geoderma.2005.06.003

Dowrick, D. J., Hughes, S., Freeman, C., Lock, M. A., Reynolds, B. & Hudson, J. A. (1999a). Nitrous oxide emissions from a gully mire in mid-Wales, UK, under simulated summer drought. *Biogeochemistry*, 44, 151-162.

Dowrick, D. J., Hughes, S., Freeman, C., Lock, M. A., Reynolds, B. & Hudson, J. A. (1999b). Nitrous oxide emissions from a gully mire in mid-Wales, UK, under simulated summer drought. *Biogeochemistry* 44, 151-162. https://doi.org/10.1023/A:1006031731037

Effects of human activities on carbon fluxes and stroage in the Zoige peatland of the Qinghai-Tibet Plateau. [D]. Chinese Academy of Foestry. In Chinese with English abstract

Eickenscheid, T., Heinichen, J., Augustin, J., Freibauer, A. & Drösler, M. (2014). Nitrogen mineralization and gaseous nitrogen losses from waterlogged and drained organic soils in a black alder (*Alnus glutinosa* (L.) Gaertn.) forest. *Biogeosciences*, 11, 2961–2976. https://doi.org/10.5194/bg-11-2961-2014

Feng, D. (2009). Effects of drained mires for forestry on CO2, CH4 and N2O emissions in Xiaoxing’an Mountain northeast China. [D]. Northeast Forestry University. In Chinese with English abstract

Freeman, C., Lock, M. A. & Reynolds, B. (1993). Fluxes of CO2, CH4, and N2O from a Welsh peatland following simulation of water table draw-down: Potential feedback to climatic change. *Biogeochemistry*, 19, 51-60. https://doi.org/10.1007/BF00000574

Funk, D. W., Pullman, E. R., Peterson, K. M., Crill, P. M. & Billings, W. D. (1994). Influence of water table on carbon dioxide, carbon monoxide, and methane fluxes from taiga bog microcosms. *Global Biogeochemical Cycles*, 8, 271-278.

Furukawa, Y., Inubushi, K., Ali, M., Itang, A. M. & Tsuruta, H. (2005). Effect of changing groundwater levels caused by land-use changes on greenhouse gas fluxes from tropical peat lands. *Nutrient Cycling in Agroecosystems* 71, 81-91. https://doi.org/10.1007/s10705-004-5286-5

Gao, Y. (2016). Effects of water table level and soil temperature on CH4 emission in Zioge. [M]. Northwest A & F University. In Chinese with English abstract

Gao, Y., Chen, H. & Zeng, X. (2014). Effects of nitrogen and sulfur deposition on CH4 and N2O fluxes in high-altitude peatland soil under different water tables in the Tibetan Plateau. *Soil Science and Plant Nutrition*, 60, 404-410. https://doi.org/10.1080/00380768.2014.893812

Grünfeld, S. & Brix, H. (1999). Methanogenesis and methane emissions: effects of water table, substrate type and presence of *Phragmites australis*. *Aquatic Botany*, 64, 63-75. https://doi.org/10.1016/S0304-3770(99)00010-8

Happell, J. D. & Chanton, J. P. (1993). Carbon remineralization in a north Florida swamp forest: effects of water level on the pathways and rates of soil organic decomposition. *Global Biogeochemical Cycles*, 7, 475-490.

Henneberg, A., Brix, H. & Sorrell, B. K. (2015). The interactive effect of *Juncus effusus* and water table position on mesocosm methanogenesis and methane emissions. *Plant and Soil*, 400, 45-54. https://doi.org/10.1007/s11104-015-2707-y

Hergoualc’h, K. & Verchot, L. V. (2014). Greenhouse gas emission factors for land use and land-use change in Southeast Asian peatlands. *Mitigation and Adaptation Strategies for Global Change*, 19, 789-807. https://doi.org/10.1007/s11027-013-9511-x

Hirano, T., Jauhiainen, J., Inoue, T. & Takahashi, H. (2009). Controls on the carbon balance of tropical peatlands. *Ecosystems*, 12, 873-887. https://doi.org/10.1007/s10021-008-9209-1

Hirano, T., Segah, H., Kusin, K., Limin, S., Takahashi, H. & Osaki, M. (2012). Effects of disturbances on the carbon balance of tropical peat swamp forests. *Global Change Biology*, 18, 3410-3422. https://doi.org/10.1111/j.1365-2486.2012.02793.x

Hribljan, J. A., Kane, E. S. & Chimner, R. A. (2017). Implications of altered hydrology for substrate quality and trace gas production in a poor fen peatland. *Soil Science Society of America Journal*, 81, 633-646. https://doi.org/10.2136/sssaj2016.10.0322

Hu, J., VanZomeren, C. M., Inglett, K. S., Wright, A. L., Clark, M. W. & Reddy, K. R. (2017). Greenhouse gas emissions under different drainage and flooding regimes of cultivated peatlands. *Journal of Geophysical Research: Biogeosciences*, 122, 3047-3062. https://doi.org/10.1002/2017JG004010

Hughes, S., Dowrick, D. J., Freeman, C., Hudson, J. A. & Reynolds, B. (1999). Methane emissions from a gully mire in Mid-Wales, U.K. under consecutive summer water table drawdown. *Environmental Science & Technology* 33, 362-365. https://doi.org/10.1021/es980563z

Inubushi, K., Hadi, A., Okazaki, M. & Yonebayashi, K. (1998). Effect of converting wetland forest to sago palm plantations on methane gas flux and organic carbon dynamics in tropical peat soil. *Hydrological Processes*, 12, 2073-2080. https://doi.org/https://doi.org/10.1002/(SICI)1099-1085(19981030)12:13/14<2073::AID-HYP720>3.0.CO;2-K

Ishikura, K., Darung, U., Inoue, T. & Hatano, R. (2018). Variation in soil properties regulate greenhouse gas fluxes and global warming potential in three land use types on tropical peat. *Atmosphere*, 465, https://doi.org/10.3390/atmos9120465

Jaatinen, K., Tuittila, E.-S., Laine, J., Yrjälä, K. & Fritze, H. (2005). Methane-oxidizing bacteria in a finnish raised mire complex: Effects of site fertility and drainage. *Microbial Ecology*, 50, 429-439. <https://doi.org/10.1007/s00248-004-0219-z>

Jauhiainen, J., Silvennoinen, H., Hämäläinen, R., Kusin, K., Limin, S., Raison, R. J. & Vasander, H. (2012). Nitrous oxide fluxes from tropical peat with different disturbance history and management. *Biogeosciences*, 9, 1337-1350. https://doi.org/10.5194/bg-9-1337-2012

Johnson, L. C., Shaver, G. R., Giblin, A. E., Nadelhoffer, K. J., Rastetter, E. R., Laundre, J. A. & Murray, G. L. (1996). Effects of drainage and temperature on carbon balance of tussock tundra microcosms. *Oecologia*, 108, 737-748. https://doi.org/10.1007/BF00329050

Kandel, T. P., Lærke, P. E. & Elsgaard, L. (2018). Annual emissions of CO2, CH4 and N2O from a temperate peat bog: Comparison of an undrained and four drained sites under permanent grass and arable crop rotations with cereals and potato. *Agricultural and Forest Meteorology*, 256-257, 470-481. https://doi.org/10.1016/j.agrformet.2018.03.021

Kane, E. S., Chivers, M. R., Turetsky, M. R., Treat, C. C., Petersen, D. G., Waldrop, M., Harden, J. W. & McGuire, A. D. (2013). Response of anaerobic carbon cycling to water table manipulation in an Alaskan rich fen. *Soil Biology and Biochemistry*, 58, 50-60. https://doi.org/10.1016/j.soilbio.2012.10.032

Karu, H., Pensa, M., Ro˜o˜m, E.-I., Portsmuth, A. & Triisberg, T. (2014). Carbon fluxes in forested bog margins along a human impact gradient: could vegetation structure be used as an indicator of peat carbon emissions? *Wetland Ecology and Management*, 22, 399-417. https://doi.org/10.1007/s11273-014-9339-5

Keating Jr, M. P., A., O. C., Balachandran, D., Holland, M. M., Lizotte Jr, R. E. & Yu, K. (2016). Spatial variation related to hydrologic patterns and vegetation in greenhouse gas fluxes from the Mississippi Delta agricultural region. *Applied Soil Ecology*, 98, 278-281. https://doi.org/10.1016/j.apsoil.2015.09.012

Kim, S.-Y., Lee, S.-H., Freeman, C., Fenner, N. & Kang, H. (2008). Comparative analysis of soil microbial communities and their responses to the short-term drought in bog, fen, and riparian wetlands. *Soil Biology and Biochemistry*, 40, 2874-2880. https://doi.org/10.1016/j.soilbio.2008.08.004

Kittler, F., Burjack, I., Corradi, C. A. R., Heimann, M., Kolle, O., Merbold, L., Zimov, N., Zimo, S. & Göckede, M. (2016). Impacts of a decadal drainage disturbance on surface–atmosphere fluxes of carbon dioxide in a permafrost ecosystem. *Biogeosciences*, 13, 5315–5332. https://doi.org/10.5194/bg-13-5315-2016

Kittler, F., Heimann, M., Kolle, O., Zimov, N., Zimov, S. & Göckede, M. (2017). Long-term drainage reduces CO2 UPTAKE and CH4 emissions in a Siberian permafrost ecosystem. *Global Biogeochemical Cycles*, 31, 1704-1717. https://doi.org/10.1002/2017gb005774

Koskinen, M., Maanavilja, L., Nieminen, M., Minkkinen, K. & Tuittila, E.-S. (2016). High methane emissions from restored Norway spruce swamps in southern Finland over one growing season. *Mires and Peat*, 17, 1-13. https://doi.org/10.19189/MaP.2015.OMB.202

Kwon, M. J., Beulig, F., Ilie, I., Ldner, M., Kusel, K., Merbold, L., Mahecha, M. D., Zimov, N., Zimov, S. A., Heimann, M., Schuur, E. A. G., Kostka, J. E., Kolle, O., Hilke, I. & Gockede, M. (2017). Plants, microorganisms, and soil temperatures contribute to a decrease in methane fluxes on a drained Arctic floodplain. *Global Change Biology*, 23, 2396-2412. https://doi.org/10.1111/gcb.13558

Kwon, M. J., Heiman, M., Kolle, O., Luus, K. A., Schuur, E. A. G., Zimov, N., Zimov, S. A. & Göckede, M. (2016). Long-term drainage reduces CO2 uptake and increases CO2 emission on a Siberian floodplain due to shifts in vegetation community and soil thermal characteristics. *Biogeosciences*, 13, 4219–4235. https://doi.org/10.5194/bg-13-4219-2016

Laine, A. M., Mäkiranta, P., Laiho, R., Mehtätalo, L., Penttilä, T., Korrensalo, A., Minkkinen, K., Fritze, H. & Tuittila, E. S. (2019b). Warming impacts on boreal fen CO2 exchange under wet and dry conditions. *Global Change Biology*, 25, 1995-2008. https://doi.org/10.1111/gcb.14617

Laine, A. M., Mehtätalo, L., Tolvanen, A., Frolking, S. & Tuittila, E. S. (2019a). Impacts of drainage, restoration and warming on boreal wetland greenhouse gas fluxes. *Science of the Total Environment*, 647, 169-181. https://doi.org/10.1016/j.scitotenv.2018.07.390

Laine, J., Silvola, J., Tolonen, K., Alm, J., Nykänen, H., Vasander, H., Sallantaus, T., Savolainen, I., Sinisalo, J. & Martikainen, P. J. (1996). Effect of water-level drawdown on global climatic warming: Northern peatlands. *Ambio*, 25, 179-184. https://doi.org/10.2307/4314450

Lupikis, A., Bardule, A., Lazdins, A., Stola, J. & Butlers, A. (2017). Carbon stock changes in drained arable organic soils in Latvia: results of a pilot study. *Agronomy Research* 15, 788-798.

Ma, L., Mu, C., Wang, B., Zhang, Y. & Li, N. (2017). Effects of wetland drainage for forestation on carbon source or sink of temperate marshes wetlands in Xiaoxing’an Mountains of China. *Scientia Silvae Sinicae*, 53, https://doi.org/10.11707/j.1001-7488.20171001

Ma, W., Alhassan, A.-R. M., Wang, Y., Li, G., Wang, H. & Zhao, J. (2018). Greenhouse gas emissions as influenced by wetland vegetation degradation along a moisture gradient on the eastern Qinghai-Tibet Plateau of North-West China. *Nutrient Cycling in Agroecosystems*, 112, 335-354. https://doi.org/10.1007/s10705-018-9950-6

Maljanen, M., Sigurdsson, B. D., Guðmundsson, J., Óskarsson, H., Huttunen, J. T. & Martikainen, P. J. (2010). Greenhouse gas balances of managed peatlands in the Nordic countries–present knowledge and gaps. *Biogeosciences*, 7, 2711-2738. https://doi.org/10.5194/bg-7-2711-2010

Martikainen, P. J., Nykänen, H., Alm, J. & Silvola, J. (1995). Change in fluxes of carbon dioxide, methane and nitrous oxide due to forest drainage of mire sites of different trophy. *Plant and Soil*, 168-169, 571-577. <https://doi.org/10.1007/BF00029370>

Martikainen, P. J., Nykänen, H., Crill, P. & Silvola, J. (1993). Effects of lowered water table on nitrous oxide fluxes from northern peatlands. *Nature*, 366, 51-53. <https://doi.org/10.1038/366051a0>

Merbold, L., Kutsch, W. L., Corradi, C., Kolle, O., Rebmann, C., Stoy, P. C., Zimov, S. A. & Schulze, E. D. (2009). Artificial drainage and associated carbon fluxes (CO2/CH4) in a tundra ecosystem. *Global Change Biology*, 15, 2599-2614. https://doi.org/10.1111/j.1365-2486.2009.01962.x

Mojeremane, W., Rees, R. M. & Mencuccini, M. (2011). The effects of site preparation practices on carbon dioxide, methane and nitrous oxide fluxes from a peaty gley soil. *Forestry*, 85, 1-15. https://doi.org/10.1093/forestry/cpr049

Moore, T. R. & Dalva, M. (1993). The influence of temperature and water table position on carbon dioxide and methane emissions from laboratory columns of peatland soils. *Journal of Soil Science*, 44, 651-664. https://doi.org/10.1111/j.1365-2389.1993.tb02330.x

Moore, T. R. & Knowles, R. (1990). Methane emissions from fen, bog and swamp peatlands in Quebec. *Biogeochemistry*, 11, 45-61. https://doi.org/10.1007/BF00000851

Muhr, J., Hohle, J., Otieno, D. O. & Borken, W. (2011). Manipulative lowering of the water table during summer does not affect CO2 emissions and uptake in a fen in Germany. *Ecological Applications*, 21, 391-401.

Munir, T. M. & Strack, M. (2014). Methane flux influenced by experimental water table drawdown and soil warming in a dry boreal continental bog. *Ecosystems* 17, 1271-1285. https://doi.org/10.1007/s10021-014-9795-z

Munir, T. M., Perkins, M., Kaing, E. & Strack, M. (2015). Carbon dioxide flux and net primary production of a boreal treed bog: Responses to warming and water-table-lowering simulations of climate change. *Biogeosciences*, 12, 1091–1111. https://doi.org/10.5194/bg-12-1091-2015

Munir, T. M., Xu, B., Perkins, M. & Strack, M. (2014). Responses of carbon dioxide flux and plant biomass to water table drawdown in a treed peatland in northern Alberta: a climate change perspective. *Biogeosciences*, 11, 807-820. https://doi.org/10.5194/bg-11-807-2014

Mustamo, P., Maljanen, M., Hyvärinen, M., Ronkanen, A.-K. & Kløve, B. (2016). Respiration and emissions of methane and nitrous oxide from a boreal peatland complex comprising different land-use types. *Boreal Environment Research*, 21, 405-426. https://doi.org/http://hdl.handle.net/10138/225772

Nykäne, H., Alm, J., Silvol, J., Tolone, K. & Martikaine, P. J. (1998). Methane fluxes on boreal peatlands of different fertility and the effect of long-term experimental lowering of the water table on flux rates. *Global Biogeochemical Cycles*, 12, 53-69. <https://doi.org/10.1029/97GB02732>

Olefeldt, D., Euskirchen, E. S., Harden, J., Kane, E., Mcguire, A. D., Waldrop, M. P. & Turetsky, M. R. (2017). A decade of boreal rich fen greenhouse gas fluxes in response to natural and experimental water table variability. *Global Change Biology*, 23, 2428–2440. https://doi.org/10.1111/gcb.13612

Palmer, K., Köpp, J., Gebauer, G. & Horn, M. A. (2016). Drying-rewetting and flooding impact denitrifier activity rather than community structure in a moderately acidic fen. *Frontiers in Microbiology* 7, 1-15. https://doi.org/10.3389/fmicb.2016.00727

Paul, C., Fealy, R., Fenton, O., Lanigan, G., O’Sullivan, L. & Schulte, R. P. O. (2018). Assessing the role of artificially drained agricultural land for climate change mitigation in Ireland. *Environmental Science and Policy*, 80, 95-104. https://doi.org/10.1016/j.envsci.2017.11.004

Pearson, M., Penttilä, T., Harjunpää, L., Laiho, R., Laine, J., Sarjala, T., Silvan, K. & Silvan, N. (2015). Effects of temperature rise and water-table-level drawdown on greenhouse gas fluxes of boreal sedge fens. *Boreal Environment Research*, 20, 489-505. https://doi.org/http://urn.fi/URN:NBN:fi-fe2016082623053

Rachwal, M. F. G., Zanatta, J. A., Dieckow, J., Denega, G. L., Curcio, G. R. & Bayer, C. (2014). Methane fluxes from waterlogged and drained histosols of highland areas. *R. Bras. Ci. Solo*, 38, 486-494.

Ratcliffe, J. L., Campbell, D. I., Clarkson, B. R., Wall, A. M. & Schipper, L. A. (2019). Water table fluctuations control CO2 exchange in wet and dry bogs through different mechanisms. *Science of the Total Environment*, 655, 1037-1046. https://doi.org/10.1016/j.scitotenv.2018.11.151

Regina, K., Nykänen, H., Silvola, J. & Martikainen, P. J. (1996). Fluxes of nitrous oxide from boreal peatlands as affected by peatland type, water table level and nitrification capacity. *Biogeochemistry*, 35, 401-418. https://doi.org/10.1007/BF02183033

Regina, K., Silvola, J. & Martikainen, P. J. (1999). Short-term effects of changing water table on N2O fluxes from peat monoliths from natural and drained boreal peatlands. *Global Change Biology*, 5, 183-189. https://doi.org/10.1046/j.1365-2486.1999.00217.x

Roulet, N. & Moore, T. (1995). The effect of forestry drainage practices on the emission of methane from northern peatlands. *Canadian Journal of Forest Research*, 25, 491-499. https://doi.org/10.1139/x95-055

Roulet, N. T., Ash, R., Quinton, W. L. & Moore, T. (1993). Methane flux from drained northern peatlands: Effect of a persistent water table lowering on flux. *Global Biogeochemical Cycles*, 7, 749-769. https://doi.org/10.1029/93GB01931

Salm, J.-O., Maddison, M., Tammik, S., Soosaar, K., Truu, J. & Mander, U. (2012). Emissions of CO2, CH4 and N2O from undisturbed, drained and mined peatlands in Estonia. *Hydrobiologia*, 692, 41-55. https://doi.org/10.1007/s10750-011-0934-7

Strack, M. & Waddington, J. M. (2007). Response of peatland carbon dioxide and methane fluxes to a water table drawdown experiment. *Global Biogeochemical Cycles*, 21, https://doi.org/10.1029/2006GB002715

Strack, M. & Zuback, Y. C. A. (2013). Annual carbon balance of a peatland 10 yr following restoration. *Biogeosciences*, 10, 2885-2896. https://doi.org/10.5194/bg-10-2885-2013

Strack, M., Waddington, J. M. & Tuittila, E. S. (2004). Effect of water table drawdown on northern peatland methane dynamics: Implications for climate change. *Global Biogeochemical Cycles*, 18, n/a-n/a. https://doi.org/10.1029/2003gb002209

Strack, M., Waddington, J. M., Lucchese, M. C. & Cagampan, J. P (2009). Moisture controls on CO2 exchange in a Sphagnum-dominated peatland: results from an extreme drought field experiment. *Ecohydrology*, 2, 454-461. https://doi.org/10.1002/eco.68

Strack, M., Waddington, J. M., Rochefort, L. & Tuittila, E.-S. (2006). Response of vegetation and net ecosystem carbon dioxide exchange at different peatland microforms following water table drawdown. *Journal of Geophysical Research*, 111, https://doi.org/10.1029/2005JG000145

Sun, X., Mu, C., Feng, D., Liu, X., Cheng, W. & Shi, L. (2009). Effects of wetland draining for forestation on methane emissions in Xiaoxing an Mountains, Northeast China. *Acta Ecologica Sinica*, 29, 4251-4259.

Sun, Y., Shen, J., Zhang, C., Sun, S. & He, J. (2017). Effects of water table lowering and mowing on soil ammonia oxidizers and denitrifiers in alpine wetlands. *Journal of Agro-Environment Science*, 36, 2356-2364. https://doi.org/10.11654/jaes.2017-0589

Swails, E., Yang, X., Asefi, S., Hergoualc’h, K., Verchot, L., McRoberts, R. E. & Lawrence, D. (2019). Linking soil respiration and water table depth in tropical peatlands with remotely sensed changes in water storage from the gravity recovery and climate experiment. *Mitigation and Adaptation Strategies for Global Change*, 24, 575-590. https://doi.org/10.1007/s11027-018-9822-z

Takakai, F., Morishita, T., Hashidoko, Y., Darung, U., Kuramochi, K., Dohong, S., H. Limin, S. & Hatano, R. (2006). Effects of agricultural land-use change and forest fire on N2O emission from tropical peatlands, Central Kalimantan, Indonesia. *Soil Science and Plant Nutrition*, 52, 662-674. https://doi.org/10.1111/j.1747-0765.2006.00084.x

Tangen, B. A., Finocchiaro, R. G. & Gleason, R. A. (2015). Effects of land use on greenhouse gas fluxes and soil properties of wetland catchments in the Prairie Pothole Region of North America. *Science of the Total Environment*, 533, 391-409. https://doi.org/10.1016/j.scitotenv.2015.06.148

Turetsky, M. R., Treat, C. C., Waldrop, M. P., Waddington, J. M., Harden, J. W. & McGuire, A. D. (2008). Short-term response of methane fluxes and methanogen activity to water table and soil warming manipulations in an Alaskan peatland. *Journal of Geophysical Research*, 113, https://doi.org/10.1029/2007JG000496

Updegraff, K., Bridgham, S. D., Pastor, J., Weishampel, P. & Harth, C. (2001). Response of CO2 and CH4 emissions from peatlands to warming and water table manipulation. *Ecological Applications*, 11, 311-326.

Urbanová, Z., Picek, T. & Tuittila, E.-S. (2013a). Sensitivity of carbon gas fluxes to weather variability on pristine, drained and rewetted temperate bogs. *Mires and Peat*, 11, 1-14.

Urbanová, Z., Bárta, J. & Picek, T. S. (2013b). Methane emissions and methanogenic archaea on pristine, drained and restored mountain peatlands, Central Europe. Ecosystems, 16, 664-677. https://doi.org/10.1007/s10021-013-9637-4

Urbanová, Z., Picek, T. s. & Bárta, J. (2011). Effect of peat re-wetting on carbon and nutrient fluxes, greenhouse gas production and diversity of methanogenic archaeal community. *Ecological Engineering*, 37, 1017-1026. https://doi.org/10.1016/j.ecoleng.2010.07.012

Urbanová, Z., Picek, T., Hájek, T., Bufková, I. & Tuittila, E.-S. (2012). Vegetation and carbon gas dynamics under a changed hydrological regime in central European peatlands. *Plant Ecology & Diversity*, 5, 89-103. <https://doi.org/10.1080/17550874.2012.688069>

Valbuena-Parralejo, N., Tuohya, P., Fentonc, O., Burchilla, W., Williamsb, M., Laniganc, G. J. & Humphreys, J. (2019). Greenhouse gas emissions from temperate permanent grassland on clayloam soil following the installation of artificial drainage. *Agriculture, Ecosystems and Environment*, 269, 39-50. https://doi.org/10.1016/j.agee.2018.09.011

Wan, Z. (2013). Effects of water level on CO2 and CH4 flux and soil microbial activity in *Calamagrostis angustifolia* marsh. *Ecology and Environmental Sciences*, 22, 465-468. https://doi.org/10.16258/j.cnki.1674-5906.2013.03.018

Wang, D., Gao, Y., An, X., Wang, R. & Xie, Q. (2016a). Responses of greenhouse gas emissions to water table fluctuations in an alipne wetland on the Qinghai-Tibetan Plateau. *Acta Prataculturae Sinica*, 25, 27-35. https://doi.org/10.11686/cyxb2016012

Wang, H., Yu, L., Zhang, Z., Liu, W., Chen, L., Cao, G., Yue, H., Zhou, J., Yang, Y., Tang, Y. & He, J. (2016b). Molecular mechanisms of water table lowering and nitrogen deposition in affecting greenhouse gas emissions from a Tibetan alpine wetland. *Global Change Biology*, 23, 815-829. https://doi.org/10.1111/gcb.13467

Wang, J., Wang, G., Hu, H. & Wu, Q. (2009). The influence of degradation of the swamp and alpine meadows on CH4 and CO2 fluxes on the Qinghai-Tibetan Plateau. *Environmental Earth Sciences*, 60, 537-548. https://doi.org/10.1007/s12665-009-0193-3

Wilson, D., Farrell, C. A., Fallon, D., Moser, G., Müller, C. & Renou-Wilson, F. (2016). Multiyear greenhouse gas balances at a rewetted temperate peatland. *Global Change Biology*, 22, 4080-4095. https://doi.org/10.1111/gcb.13325

Yamulki, S., Anderson, R., Peace, A. & Morison, J. I. L. (2013). Soil CO2 CH4 and N2O fluxes from an afforested lowland raised peatbog in Scotland: implications for drainage and restoration. *Biogeosciences*, 10, 1051-1065. https://doi.org/10.5194/bg-10-1051-2013

Yang, G., Chen, H., Wu, N., Tian, J., Peng, C., Zhu, Q., Zhu, D., He, Y., Zheng, Q. & Zhang, C. (2014). Effects of soil warming, rainfall reduction and water table level on CH4 emissions from the Zoige peatland in China. *Soil Biology and Biochemistry*, 78, 83-89. https://doi.org/10.1016/j.soilbio.2014.07.013

Yang, G., Tian, J., Chen, H., Jiang, L., Zhan, W., Hu, J., Zhu, E., Peng, C., Zhu, Q., Zhu, D., He, Y., Li, M. & Dong, F. (2019). Peatland degradation reduces methanogens and methane emissions from surface to deep soils. *Ecological Indicators*, 106, https://doi.org/10.1016/j.ecolind.2019.105488

Yang, J., Liu, J., Hu, X., Li, X., Wang, Y. & Li, H. (2013). Effect ofwater table level on CO2, CH4 and N2O emissions in a freshwater marsh of Northeast China. *Soil Biology and Biochemistry*, 61, 52-60. https://doi.org/10.1016/j.soilbio.2013.02.009

Yrjälä, K., Tuomivirta, T., Juottonen, H., Putkinen, A., Lappi, K., Tuittila, E.-S., Penttilä, T., Minkkinen, K., Laine, J., Peltoniemi, K. & Fritze, H. (2017). CH4 production and oxidation processes in a boreal fen ecosystem after long-term water table drawdown. *Global Change Biology*, 17, 1311-1320. https://doi.org/10.1111/j.1365-2486.2010.02290.x

Zhou, W., Cui, L., Wang, Y. & Li, W. (2017). Methane emissions from natural and drained peatlands in the Zoige, eastern Qinghai-Tibet Plateau. *Journal of Forestry*, 28, 539-547. https://doi.org/10.1007/s11676-016-0343-x

# **NEE Gap-filling References**

Aslan-Sungur, G., Lee, X., Evrendilek, F. & Karakaya, N. (2016). Large interannual variability in net ecosystem carbon dioxide exchange of a disturbed temperate peatland. *Science of the Total Environment*, 554-555, 192-202. https://doi.org/10.1016/j.scitotenv.2016.02.153

Aurela, M., Laurila, T. & Tuovinen, J.-P. (2002). Annual CO2 balance of a subarctic fen in northern Europe: Importance of the wintertime efflux. *Journal of Geophysical Research: Atmospheres*, 107, ACH 17-11-ACH 17-12. https://doi.org/10.1029/2002jd002055

Aurela, M., Lohila, A., Riutta, T., Tuovinen, J.-P. & Laurila, T. (2009). Carbon dioxide exchange on a northern boreal fen. *Boreal Environment Research* 14, 699-710.

Berger, S., Braeckevelt, E., Blodau, C., Burger, M., Goebel, M., Klemm, O., Knorr, K. H. & Wagner-Riddle, C. (2019). A 1-year greenhouse gas budget of a peatland exposed to long-term nutrient infiltration and altered hydrology: high carbon uptake and methane emission. *Environmental Monitoring and Assessment* 191, 533. https://doi.org/10.1007/s10661-019-7639-1

Beringer, J., Livesley, S. J., Randle, J. & Hutley, L. B. (2013). Carbon dioxide fluxes dominate the greenhouse gas exchanges of a seasonal wetland in the wet–dry tropics of northern Australia. *Agricultural and Forest Meteorology*, 182-183, 239-247. https://doi.org/10.1016/j.agrformet.2013.06.008

Cao, S., Cao, G., Feng, Q., Han, G., Lin, Y., Yuan, J., Wu, F. & Cheng, S. (2017). Alpine wetland ecosystem carbon sink and its controls at the Qinghai Lake. *Environmental Earth Sciences*, 76, https://doi.org/10.1007/s12665-017-6529-5

Christensen, T. R., Jackowicz-Korczyński, M., Aurela, M., Crill, P., Heliasz, M., Mastepanov, M. & Friborg, T. (2012). Monitoring the multi-year carbon balance of a subarctic palsa mire with micrometeorological techniques. *Ambio*, 41 (Supplement 3), 207-217. https://doi.org/10.1007/s13280-012-0302-5

Chu, H., Chen, J., Gottgens, J. F., Ouyang, Z., John, R., Czajkowski, K. & Becker, R. (2014). Net ecosystem methane and carbon dioxide exchanges in a Lake Erie coastal marsh and a nearby cropland. *Journal of Geophysical Research: Biogeosciences*, 119, 722-740. https://doi.org/10.1002/2013jg002520

Cliche Trudeau, N., Garneau, M. & Pelletier, L. (2014). Interannual variability in the CO2 balance of a boreal patterned fen, James Bay, Canada. *Biogeochemistry*, 118, 371-387. https://doi.org/10.1007/s10533-013-9939-9

Drollinger, S., Maier, A. & Glatzel, S. (2019). Interannual and seasonal variability in carbon dioxide and methane fluxes of a pine peat bog in the Eastern Alps, Austria. *Agricultural and Forest Meteorology*, 275, 69-78. https://doi.org/10.1016/j.agrformet.2019.05.015

Fortuniak, K., Pawlak, W., Bednorz, L., Grygoruk, M., Siedlecki, M. & Zieliński, M. (2017). Methane and carbon dioxide fluxes of a temperate mire in Central Europe. *Agricultural and Forest Meteorology*, 232, 306-318. https://doi.org/10.1016/j.agrformet.2016.08.023

Gažoviĉ, M., Forbrich, I., Jager, D. F., Kutzbach, L., Wille, C. & Wilmking, M. (2013). Hydrology-driven ecosystem respiration determines the carbon balance of a boreal peatland. *Science of the Total Environment*, 463-464, 675-682. <https://doi.org/10.1016/j.scitotenv.2013.06.077>

Goodrich, J. P., Campbell, D. I. & Schipper, L. A. (2017). Southern Hemisphere bog persists as a strong carbon sink during droughts. *Biogeosciences*, 14, 4563-4576. https://doi.org/10.5194/bg-14-4563-2017

Hao, Y. B., Cui, X. Y., Wang, Y. F., Mei, X. R., Kang, X. M., Wu, N., Luo, P. & Zhu, D. (2011). Predominance of precipitation and temperature controls on ecosystem CO2 exchange in Zoige alpine wetlands of Southwest China. *Wetlands*, 31, 413-422. https://doi.org/10.1007/s13157-011-0151-1

Heikkinen, J. E. P., Elsakov, V. & Martikainen, P. J. (2002). Carbon dioxide and methane dynamics and annual carbon balance in tundra wetland in NE Europe, Russia. *Global Biogeochemical Cycles*, 16, 62-61-62-15. https://doi.org/10.1029/2002gb001930

Helbig, M., Chasmer, L. E., Desai, A. R., Kljun, N., Quinton, W. L. & Sonnentag, O. (2017). Direct and indirect climate change effects on carbon dioxide fluxes in a thawing boreal forest-wetland landscape. *Global Change Biology*, 23, 3231-3248. https://doi.org/10.1111/gcb.13638

Helfter, C., Campbell, C., Dinsmore, K. J., Drewer, J., Coyle, M., Anderson, M., Skiba, U., Nemitz, E., Billett, M. F. & Sutton, M. A. (2015). Drivers of long-term variability in CO2 net ecosystem exchange in a temperate peatland. *Biogeosciences*, 12, 1799-1811. https://doi.org/10.5194/bg-12-1799-2015

Hirano, T., Segah, H., Harada, T., Limin, S., June, T., Hirata, R. & Osaki, M. (2007). Carbon dioxide balance of a tropical peat swamp forest in Kalimantan, Indonesia. *Global Change Biology*, 13, 412-425. https://doi.org/10.1111/j.1365-2486.2006.01301.x

Hommeltenberg, J., Mauder, M., Drösler, M., Heidbach, K., Werle, P. & Schmid, H. P. (2014). Ecosystem scale methane fluxes in a natural temperate bog-pine forest in southern Germany. *Agricultural and Forest Meteorology*, 198-199, 273-284. https://doi.org/10.1016/j.agrformet.2014.08.017

Humphreys, E. R., Charron, C., Brown, M. & Jones, R. (2018). Two bogs in the Canadian Hudson Bay Lowlands and a temperate bog reveal similar annual net ecosystem exchange of CO2. *Arctic, Antarctic, and Alpine Research*, 46, 103-113. https://doi.org/10.1657/1938-4246.46.1.103

Jammet, M., Dengel, S., Kettner, E., Parmentier, F.-J. W., Wik, M., Crill, P. & Friborg, T. (2017). Year-round CH4 and CO2 flux dynamics in two contrasting freshwater ecosystems of the subarctic. *Biogeosciences*, 14, 5189-5216. https://doi.org/10.5194/bg-14-5189-2017

Järveoja, J., Peichl, M., Maddison, M., Soosaar, K., Vellak, K., Karofeld, E., Teemusk, A. & Mander, Ü. (2016). Impact of water table level on annual carbon and greenhouse gas balances of a restored peat extraction area. *Biogeosciences*, 13, 2637-2651. https://doi.org/10.5194/bg-13-2637-2016

Kittler, F., Heimann, M., Kolle, O., Zimov, N., Zimov, S. & Göckede, M. (2017). Long-term drainage reduces CO2 UPTAKE and CH4 emissions in a Siberian permafrost ecosystem. *Global Biogeochemical Cycles*, 31, 1704-1717. https://doi.org/10.1002/2017gb005774

Lafleur, P. M., Roulet, N. T. & Admiral, S. W. (2001). Annual cycle of CO2 exchange at a bog peatland. *Journal of Geophysical Research: Atmospheres*, 106, 3071-3081. https://doi.org/10.1029/2000jd900588

Lafleur, P. M., Roulet, N. T., Bubier, J. L., Frolking, S. & Moore, T. R. (2003). Interannual variability in the peatland-atmosphere carbon dioxide exchange at an ombrotrophic bog. *Global Biogeochemical Cycles*, 17, n/a-n/a. https://doi.org/10.1029/2002gb001983

Liu, J. & Lai, D. Y. F. (2019). Subtropical mangrove wetland is a stronger carbon dioxide sink in the dry than wet seasons. *Agricultural and Forest Meteorology*, 278, https://doi.org/10.1016/j.agrformet.2019.107644

Liu, X., Zhu, D., Zhan, W., Chen, H., Zhu, Q., Hao, Y., Liu, W. & He, Y. (2019). Five‐year measurements of net ecosystem CO2 exchange at a fen in the Zoige Peatlands on the Qinghai‐Tibetan Plateau. *Journal of Geophysical Research: Atmospheres*, 124, 11803-11818. https://doi.org/10.1029/2019jd031429

Lohila, A., Minkkinen, K., Aurela, M., Tuovinen, J. P., Penttilä, T., Ojanen, P. & Laurila, T. (2011). Greenhouse gas flux measurements in a forestry-drained peatland indicate a large carbon sink. *Biogeosciences*, 8, 3203-3218. https://doi.org/10.5194/bg-8-3203-2011

Lund, M., Christensen, T. R., Lindroth, A. & Schubert, P. (2012). Effects of drought conditions on the carbon dioxide dynamics in a temperate peatland. *Environmental Research Letters*, 7, https://doi.org/10.1088/1748-9326/7/4/045704

Marushchak, M. E., Kiepe, I., Biasi, C., Elsakov, V., Friborg, T., Johansson, T., Soegaard, H., Virtanen, T. & Martikainen, P. J. (2013). Carbon dioxide balance of subarctic tundra from plot to regional scales. *Biogeosciences*, 10, 437-452. https://doi.org/10.5194/bg-10-437-2013

McVeigh, P., Sottocornola, M., Foley, N., Leahy, P. & Kiely, G. (2014). Meteorological and functional response partitioning to explain interannual variability of CO2 exchange at an Irish Atlantic blanket bog. *Agricultural and Forest Meteorology*, 194, 8-19. https://doi.org/10.1016/j.agrformet.2014.01.017

Mezbahuddin, M., Grant, R. F. & Flanagan, L. B. (2017). Coupled eco-hydrology and biogeochemistry algorithms enable the simulation of water table depth effects on boreal peatland net CO2 exchange. *Biogeosciences*, 14, 5507-5531. https://doi.org/10.5194/bg-14-5507-2017

Minkkinen, K., Ojanen, P., Penttilä, T., Aurela, M., Laurila, T., Tuovinen, J.-P. & Lohila, A. (2018). Persistent carbon sink at a boreal drained bog forest. *Biogeosciences*, 15, 3603-3624. https://doi.org/10.5194/bg-15-3603-2018

Niu, B., He, Y., Zhang, X., Du, M., Shi, P., Sun, W. & Zhang, L. (2017). CO2 exchange in an alpine swamp meadow on the central Tibetan Plateau. *Wetlands*, 37, 525-543. https://doi.org/10.1007/s13157-017-0888-2

Olefeldt, D., Roulet, N. T., Bergeron, O., Crill, P., Bäckstrand, K. & Christensen, T. R. (2012). Net carbon accumulation of a high-latitude permafrost palsa mire similar to permafrost-free peatlands. *Geophysical Research Letters*, 39, https://doi.org/10.1029/2011gl050355

Olson, D. M., Griffis, T. J., Noormets, A., Kolka, R. & Chen, J. (2013). Interannual, seasonal, and retrospective analysis of the methane and carbon dioxide budgets of a temperate peatland. *Journal of Geophysical Research: Biogeosciences*, 118, 226-238. https://doi.org/10.1002/jgrg.20031

Peichl, M., Öquist, M., Ottosson Löfvenius, M., Ilstedt, U., Sagerfors, J., Grelle, A., Lindroth, A. & Nilsson, M. B. (2014). A 12-year record reveals pre-growing season temperature and water table level threshold effects on the net carbon dioxide exchange in a boreal fen. *Environmental Research Letters*, 9, https://doi.org/10.1088/1748-9326/9/5/055006

Peng, H., Guo, Q., Ding, H., Hong, B., Zhu, Y., Hong, Y., Cai, C., Wang, Y. & Yuan, L. (2019). Multi-scale temporal variation in methane emission from an alpine peatland on the Eastern Qinghai-Tibetan Plateau and associated environmental controls. *Agricultural and Forest Meteorology*, 276-277, https://doi.org/10.1016/j.agrformet.2019.107616

Pullens, J. W. M., Sottocornola, M., Kiely, G., Toscano, P. & Gianelle, D. (2016). Carbon fluxes of an alpine peatland in Northern Italy. *Agricultural and Forest Meteorology*, 220, 69-82. https://doi.org/10.1016/j.agrformet.2016.01.012

Ratcliffe, J. L., Campbell, D. I., Clarkson, B. R., Wall, A. M. & Schipper, L. A. (2019). Water table fluctuations control CO2 exchange in wet and dry bogs through different mechanisms. *Science of the Total Environment*, 655, 1037-1046. https://doi.org/10.1016/j.scitotenv.2018.11.151

Rinne, J., Tuittila, E.-S., Peltola, O., Li, X., Raivonen, M., Alekseychik, P., Haapanala, S., Pihlatie, M., Aurela, M., Mammarella, I. & Vesala, T. (2018). Temporal variation of ecosystem scale methane emission from a boreal fen in relation to temperature, water table position, and carbon dioxide fluxes. *Global Biogeochemical Cycles*, 32, 1087-1106. https://doi.org/10.1029/2017gb005747

Roehm, C. L. & Roulet, N. T. (2003). Seasonal contribution of CO2 fluxes in the annual C budget of a northern bog. *Global Biogeochemical Cycles*, 17, https://doi.org/10.1029/2002gb001889

Roulet, N. T., Lafleur, P. M., Richard, P. J. H., Moore, T. R., Humphreys, E. R. & Bubier, J. (2007). Contemporary carbon balance and late Holocene carbon accumulation in a northern peatland. *Global Change Biology*, 13, 397-411. https://doi.org/10.1111/j.1365-2486.2006.01292.x

Sagerfors, J., Lindroth, A., Grelle, A., Klemedtsson, L., Weslien, P. & Nilsson, M. (2008). Annual CO2 exchange between a nutrient-poor, minerotrophic, boreal mire and the atmosphere. *Journal of Geophysical Research: Biogeosciences*, 113, https://doi.org/10.1029/2006jg000306

Strachan, I. B., Nugent, K. A., Crombie, S. & Bonneville, M.-C. (2015). Carbon dioxide and methane exchange at a cool-temperate freshwater marsh. *Environmental Research Letters*, 10, https://doi.org/10.1088/1748-9326/10/6/065006

Strachan, I. B., Pelletier, L. & Bonneville, M.-C. (2016). Inter-annual variability in water table depth controls net ecosystem carbon dioxide exchange in a boreal bog. *Biogeochemistry*, 127, 99-111. https://doi.org/10.1007/s10533-015-0170-8

Strack, M. & Zuback, Y. C. A. (2013). Annual carbon balance of a peatland 10 yr following restoration. *Biogeosciences*, 10, 2885-2896. https://doi.org/10.5194/bg-10-2885-2013

Strilesky, S. L. & Humphreys, E. R. (2012). A comparison of the net ecosystem exchange of carbon dioxide and evapotranspiration for treed and open portions of a temperate peatland. *Agricultural and Forest Meteorology*, 153, 45-53. https://doi.org/10.1016/j.agrformet.2011.06.006

Syed, K. H., Flanagan, L. B., Carlson, P. J., Glenn, A. J. & Van Gaalen, K. E. (2006). Environmental control of net ecosystem CO2 exchange in a treed, moderately rich fen in northern Alberta. *Agricultural and Forest Meteorology*, 140, 97-114. https://doi.org/10.1016/j.agrformet.2006.03.022

Zhao, L., Li, J., Xu, S., Zhou, H., Li, Y., Gu, S. & Zhao, X. (2010). Seasonal variations in carbon dioxide exchange in an alpine wetland meadow on the Qinghai-Tibetan Plateau. *Biogeosciences*, 7, 1207-1221. https://doi.org/10.5194/bg-7-1207-2010

# **Methane Flux Gap-filling References**

Alm, J., Saarnio, S., Nykänen, H., Silvola, J. & Martikainen, P. J. (1999). Winter CO2, CH4 and N2O fluxes on some natural and drained boreal peatlands. *Biogeochemistry*, 44, 163-186. https://doi.org/10.1007/BF00992977

Arnold, K. V., Nilsson, M., Hånell, B., Weslien, P. & Klemedtsson, L. (2005b). Fluxes of CO2, CH4 and N2O from drained organic soils in deciduous forests. *Soil Biology and Biochemistry*, 37, 1059-1071. https://doi.org/10.1016/j.soilbio.2004.11.004

Arnold, K. V., Weslien, P., Nilsson, M., Svensson, B. H. & Klemedtsson, L. (2005a). Fluxes of CO2, CH4 and N2O from drained coniferous forests on organic soils. *Forest Ecology and Management*, 210, 239-254. https://doi.org/10.1016/j.foreco.2005.02.031

Berger, S., Braeckevelt, E., Blodau, C., Burger, M., Goebel, M., Klemm, O., Knorr, K. H. & Wagner-Riddle, C. (2019). A 1-year greenhouse gas budget of a peatland exposed to long-term nutrient infiltration and altered hydrology: high carbon uptake and methane emission. *Environmental Monitoring and Assessment* 191, 533. https://doi.org/10.1007/s10661-019-7639-1

Cao, R., Chen, Y., Wu, X., Zhou, Q. & Sun, S. (2018). The effect of drainage on CO2, CH4 and N2O emissions in the Zoige peatland a 40-month *in situ* study. *Mires and Peat*, 21, 1-15. https://doi.org/10.19189/MaP.2017.OMB.292

Christensen, T. R., Jackowicz-Korczynski, M., Aurela, M., Crill, P., Heliasz, M., Mastepanov, M. & Friborg, T. (2012). Monitoring the multi-year carbon balance of a subarctic palsa mire with micrometeorological techniques. *Ambio*, 41 (Supplement 3), 207-217. https://doi.org/10.1007/s13280-012-0302-5

Chu, H., Chen, J., Gottgens, J. F., Ouyang, Z., John, R., Czajkowski, K. & Becker, R. (2014). Net ecosystem methane and carbon dioxide exchanges in a Lake Erie coastal marsh and a nearby cropland. *Journal of Geophysical Research: Biogeosciences*, 119, 722-740. https://doi.org/10.1002/2013jg002520

Danevčič, T., Mandic-Mulec, I., Stres, B., Stopar, D. & Hacin, J. (2010). Emissions of CO2, CH4 and N2O from Southern European peatlands. *Soil Biology and Biochemistry*, 42, 1437-1446. https://doi.org/10.1016/j.soilbio.2010.05.004

Dinsmore, K. J., Skiba, U. M., Billett, M. F., Rees, R. M. & Drewer, J. (2009). Spatial and temporal variability in CH4 and N2O fluxes from a Scottish ombrotrophic peatland: Implications for modelling and up-scaling. *Soil Biology and Biochemistry*, 41, 1315-1323. https://doi.org/10.1016/j.soilbio.2009.03.022

Dise, N. B. (1993). Methane emission from Minnesota peatlands Spatial and seasonal variability. *Global Biogeochemical Cycles*, 7, 123-142. https://doi.org/10.1029/92GB02299

Drollinger, S., Maier, A. & Glatzel, S. (2019). Interannual and seasonal variability in carbon dioxide and methane fluxes of a pine peat bog in the Eastern Alps, Austria. *Agricultural and Forest Meteorology*, 275, 69-78. https://doi.org/10.1016/j.agrformet.2019.05.015

Fortuniak, K., Pawlak, W., Bednorz, L., Grygoruk, M., Siedlecki, M. & Zieliński, M. (2017). Methane and carbon dioxide fluxes of a temperate mire in Central Europe. *Agricultural and Forest Meteorology*, 232, 306-318. https://doi.org/10.1016/j.agrformet.2016.08.023

Gažoviĉ, M., Forbrich, I., Jager, D. F., Kutzbach, L., Wille, C. & Wilmking, M. (2013). Hydrology-driven ecosystem respiration determines the carbon balance of a boreal peatland. *Science of the Total Environment*, 463-464, 675-682. <https://doi.org/10.1016/j.scitotenv.2013.06.077>

Golovatskaya, E. A. & Dyukarev, E. A. (2009). Carbon budget of oligotrophic mire sites in the Southern Taiga of Western Siberia. *Plant and Soil*, 315, 19-34. https://doi.org/10.1007/s11104-008-9842-7

Hao, Q., Wang, Y., Song, C. & Huang, Y. (2006). Contribution of winter fluxes to the annual CH4, CO2 and N2O emissions from freshwater marshes in the Sanjiang Plain. *Journal of Environmental Sciences*, 18, 270-275. https://doi.org/10.3321/j.issn:1001-0742.2006.02.012

Heikkinen, J. E. P., Elsakov, V. & Martikainen, P. J. (2002). Carbon dioxide and methane dynamics and annual carbon balance in tundra wetland in NE Europe, Russia. *Global Biogeochemical Cycles*, 16, 62-61-62-15. https://doi.org/10.1029/2002gb001930

Hommeltenberg, J., Mauder, M., Drösler, M., Heidbach, K., Werle, P. & Schmid, H. P. (2014). Ecosystem scale methane fluxes in a natural temperate bog-pine forest in southern Germany. *Agricultural and Forest Meteorology*, 198-199, 273-284. https://doi.org/10.1016/j.agrformet.2014.08.017

Jackowicz-Korczyński, M., Christensen, T. R., Bäckstrand, K., Crill, P., Friborg, T., Mastepanov, M. & Ström, L. (2010). Annual cycle of methane emission from a subarctic peatland. *Journal of Geophysical Research: Biogeosciences*, 115, https://doi.org/10.1029/2008jg000913

Jammet, M., Dengel, S., Kettner, E., Parmentier, F.-J. W., Wik, M., Crill, P. & Friborg, T. (2017). Year-round CH4 and CO2 flux dynamics in two contrasting freshwater ecosystems of the subarctic. *Biogeosciences*, 14, 5189-5216. https://doi.org/10.5194/bg-14-5189-2017

Järveoja, J., Peichl, M., Maddison, M., Soosaar, K., Vellak, K., Karofeld, E., Teemusk, A. & Mander, Ü. (2016). Impact of water table level on annual carbon and greenhouse gas balances of a restored peat extraction area. *Biogeosciences*, 13, 2637-2651. https://doi.org/10.5194/bg-13-2637-2016

Kandel, T. P., Lærke, P. E. & Elsgaard, L. (2018). Annual emissions of CO2, CH4 and N2O from a temperate peat bog: Comparison of an undrained and four drained sites under permanent grass and arable crop rotations with cereals and potato. *Agricultural and Forest Meteorology*, 256-257, 470-481. https://doi.org/10.1016/j.agrformet.2018.03.021

Kang, H. & Freeman, C. (2002). The influence of hydrochemistry on methane emissions from two contrasting northern wetlands. *Water, Air, and Soil Pollution*, 141, 263-272. https://doi.org/10.1023/A:1021324326859

Kittler, F., Heimann, M., Kolle, O., Zimov, N., Zimov, S. & Göckede, M. (2017). Long-term drainage reduces CO2 UPTAKE and CH4 emissions in a Siberian permafrost ecosystem. *Global Biogeochemical Cycles*, 31, 1704-1717. https://doi.org/10.1002/2017gb005774

Laine, J., Silvola, J., Tolonen, K., Alm, J., Nykänen, H., Vasander, H., Sallantaus, T., Savolainen, I., Sinisalo, J. & Martikainen, P. J. (1996). Effect of water-level drawdown on global climatic warming: Northern peatlands. *Ambio*, 25, 179-184. https://doi.org/10.2307/4314450

Leppälä, M., Oksanen, J. & Tuittila, E. S. (2011). Methane flux dynamics during mire succession. *Oecologia*, 165, 489-499. <https://doi.org/10.1007/s00442-010-1754-6>

Li, T., Raivonen, M., Alekseychik, P., Aurela, M., Lohila, A., Zheng, X., Zhang, Q., Wang, G., Mammarella, I., Rinne, J., Yu, L., Xie, B., Vesala, T. & Zhang, W. (2016). Importance of vegetation classes in modeling CH4 emissions from boreal and subarctic wetlands in Finland. *Science of the Total Environment*, 572, 1111-1122. https://doi.org/10.1016/j.scitotenv.2016.08.020

Lohila, A., Minkkinen, K., Aurela, M., Tuovinen, J. P., Penttilä, T., Ojanen, P. & Laurila, T. (2011). Greenhouse gas flux measurements in a forestry-drained peatland indicate a large carbon sink. *Biogeosciences*, 8, 3203-3218. https://doi.org/10.5194/bg-8-3203-2011

Ma, L., Mu, C., Wang, B., Zhang, Y. & Li, N. (2017). Effects of wetland drainage for forestation on carbon source or sink of temperate marshes wetlands in Xiaoxing’an Mountains of China. *Scientia Silvae Sinicae*, 53, 1-12. https://doi.org/10.11707/j.1001-7488.20171001

Ma, W., Alhassan, A.-R. M., Wang, Y., Li, G., Wang, H. & Zhao, J. (2018). Greenhouse gas emissions as influenced by wetland vegetation degradation along a moisture gradient on the eastern Qinghai-Tibet Plateau of North-West China. *Nutrient Cycling in Agroecosystems*, 112, 335-354. https://doi.org/10.1007/s10705-018-9950-6

Maljanen, M., Hytönen, J. & Martikainen, P. J. (2010). Cold-season nitrous oxide dynamics in a drained boreal peatland differ depending on land-use practice. *Canadian Journal of Forest Research*, 40, 565-572. https://doi.org/10.1139/x10-004

Miao, Y., Song, C., Wang, X., Meng, H., Sun, L. & Wang, J. (2016). Annual carbon gas emissions from a boreal peatland in continuous permafrost zone, Northeast China. *CLEAN - Soil, Air, Water*, 44, 456-463. https://doi.org/10.1002/clen.201400377

Mojeremane, W., Rees, R. M. & Mencuccini, M. (2011). The effects of site preparation practices on carbon dioxide, methane and nitrous oxide fluxes from a peaty gley soil. *Forestry*, 85, 1-15. https://doi.org/10.1093/forestry/cpr049

Olson, D. M., Griffis, T. J., Noormets, A., Kolka, R. & Chen, J. (2013). Interannual, seasonal, and retrospective analysis of the methane and carbon dioxide budgets of a temperate peatland. *Journal of Geophysical Research: Biogeosciences*, 118, 226-238. https://doi.org/10.1002/jgrg.20031

Peng, H., Guo, Q., Ding, H., Hong, B., Zhu, Y., Hong, Y., Cai, C., Wang, Y. & Yuan, L. (2019). Multi-scale temporal variation in methane emission from an alpine peatland on the Eastern Qinghai-Tibetan Plateau and associated environmental controls. *Agricultural and Forest Meteorology*, 276-277, https://doi.org/10.1016/j.agrformet.2019.107616

Rinne, J., Riutta, T., Pihlatie, M., Aurela, M., Haapanala, S., Tuovinen, J.-P., Tuittila, E.-S. & Vesala, T. (2007). Annual cycle of methane emission from a boreal fen measured by the eddy covariance technique. *Tellus B: Chemical and Physical Meteorology*, 59, 449-457. https://doi.org/10.1111/j.1600-0889.2007.00261.x

Song, C., Xu, X., Tian, H. & Wang, Y. (2009). Ecosystem-atmosphere exchange of CH4 and N2O and ecosystem respiration in wetlands in the Sanjiang Plain, Northeastern China. *Global Change Biology*, 15, 692-705. https://doi.org/10.1111/j.1365-2486.2008.01821.x

Song, W., Wang, H., Wang, G., Chen, L., Jin, Z., Zhuang, Q. & He, J. S. (2015). Methane emissions from an alpine wetland on the Tibetan Plateau: Neglected but vital contribution of the nongrowing season. *Journal of Geophysical Research: Biogeosciences*, 120, 1475-1490. https://doi.org/10.1002/2015jg003043

Strack, M. & Zuback, Y. C. A. (2013). Annual carbon balance of a peatland 10 yr following restoration. *Biogeosciences*, 10, 2885-2896. https://doi.org/10.5194/bg-10-2885-2013

Strack, M., Waddington, J. M. & Tuittila, E. S. (2004). Effect of water table drawdown on northern peatland methane dynamics: Implications for climate change. *Global Biogeochemical Cycles*, 18, n/a-n/a. https://doi.org/10.1029/2003gb002209

Wang, J., Wang, G., Hu, H. & Wu, Q. (2009). The influence of degradation of the swamp and alpine meadows on CH4 and CO2 fluxes on the Qinghai-Tibetan Plateau. *Environmental Earth Sciences*, 60, 537-548. https://doi.org/10.1007/s12665-009-0193-3

Wang, M., Wu, J., Lafleur, P. M., Luan, J., Chen, H. & Zhu, X. (2018). Temporal shifts in controls over methane emissions from a boreal bog. *Agricultural and Forest Meteorology*, 262, 120-134. https://doi.org/10.1016/j.agrformet.2018.07.002

Whalen, S. C. & Reeburgh, W. S. (1992). Interannual variations in tundra methane emission A 4‐year time series at fixed sites. *Global Biogeochemical Cycles*, 6, 139-159. https://doi.org/10.1029/92gb00430

Yamulki, S., Anderson, R., Peace, A. & Morison, J. I. L. (2013). Soil CO2 CH4 and N2O fluxes from an afforested lowland raised peatbog in Scotland: implications for drainage and restoration. *Biogeosciences*, 10, 1051-1065. https://doi.org/10.5194/bg-10-1051-2013

Zhang, H., Yao, Z., Ma, L., Zheng, X., Wang, R., Wang, K., Liu, C., Zhang, W., Zhu, B., Tang, X., Hu, Z. & Han, S. (2019). Annual methane emissions from degraded alpine wetlands in the eastern Tibetan Plateau. *Science of the Total Environment*, 657, 1323-1333. https://doi.org/10.1016/j.scitotenv.2018.11.443

Zona, D., Gioli, B., Commane, R., Lindaas, J., Wofsy, S. C., Miller, C. E., Dinardo, S. J., Dengel, S., Sweeney, C., Karion, A., Chang, R. Y., Henderson, J. M., Murphy, P. C., Goodrich, J. P., Moreaux, V., Liljedahl, A., Watts, J. D., Kimball, J. S., Lipson, D. A. & Oechel, W. C. (2016). Cold season emissions dominate the Arctic tundra methane budget. *Proc Natl Acad Sci U S A*, 113, 40-45. https://doi.org/10.1073/pnas.1516017113

# **Nitrous oxide Flux Gap-filling References**

Arai, H., Hadi, A., Darung, U., Limin, S. H., Hatano, R. & Inubushi, K. (2014b). A methanotrophic community in a tropical peatland is unaffected by drainage and forest fires in a tropical peat soil. *Soil Science and Plant Nutrition*, 60, 577-585. https://doi.org/10.1080/00380768.2014.922034

Arnold, K. V., Nilsson, M., Hånell, B., Weslien, P. & Klemedtsson, L. (2005a). Fluxes of CO2, CH4 and N2O from drained organic soils in deciduous forests. *Soil Biology and Biochemistry*, 37, 1059-1071. https://doi.org/10.1016/j.soilbio.2004.11.004

Arnold, K. V., Weslien, P., Nilsson, M., Svensson, B. H. & Klemedtsson, L. (2005b). Fluxes of CO2, CH4 and N2O from drained coniferous forests on organic soils. *Forest Ecology and Management*, 210, 239-254. https://doi.org/10.1016/j.foreco.2005.02.031

Aurangojeb, M., Klemedtsson, L., Rütting, T., He, H., Weslien, P., Banzhaf, S. & Kasimir, A. (2017). Nitrous oxide emissions from spruce forests on drained organic and mineral soil. *Canadian Journal of Forest Research*, 47, 1482-1487. https://doi.org/10.1139/cjfr-2016-0541

Beetz, S., Liebersbach, H., Glatzel, S., Jurasinski, G., Buczko, U. & Höper, H. (2013). Effects of land use intensity on the full greenhouse gas balance in an Atlantic peat bog. *Biogeosciences*, 10, 1067-1082. https://doi.org/10.5194/bg-10-1067-2013

Berger, S., Braeckevelt, E., Blodau, C., Burger, M., Goebel, M., Klemm, O., Knorr, K. H. & Wagner-Riddle, C. (2019). A 1-year greenhouse gas budget of a peatland exposed to long-term nutrient infiltration and altered hydrology: high carbon uptake and methane emission. *Environmental Monitoring and Assessment* 191, 533. https://doi.org/10.1007/s10661-019-7639-1

Cao, R., Chen, Y., Wu, X., Zhou, Q. & Sun, S. (2018). The effect of drainage on CO2, CH4 and N2O emissions in the Zoige peatland a 40-month *in situ* study. *Mires and Peat*, 21, 1-15. https://doi.org/10.19189/MaP.2017.OMB.292

Danevčič, T., Mandic-Mulec, I., Stres, B., Stopar, D. & Hacin, J. (2010). Emissions of CO2, CH4 and N2O from Southern European peatlands. *Soil Biology and Biochemistry*, 42, 1437-1446. https://doi.org/10.1016/j.soilbio.2010.05.004

Dinsmore, K. J., Skiba, U. M., Billett, M. F., Rees, R. M. & Drewer, J. (2009). Spatial and temporal variability in CH4 and N2O fluxes from a Scottish ombrotrophic peatland: Implications for modelling and up-scaling. *Soil Biology and Biochemistry*, 41, 1315-1323. https://doi.org/10.1016/j.soilbio.2009.03.022

Drewer, J., Lohila, A., Aurela, M., Laurila, T., Minkkinen, K., Penttilä, T., Dinsmore, K. J., McKenzie, R. M., Helfter, C., Flechard, C., Sutton, M. A. & Skiba, U. M. (2010). Comparison of greenhouse gas fluxes and nitrogen budgets from an ombotrophic bog in Scotland and a minerotrophic sedge fen in Finland. *European Journal of Soil Science*, 61, 640-650. https://doi.org/10.1111/j.1365-2389.2010.01267.x

Eickenscheidt, T., Heinichen, J. & Drösler, M. (2015). The greenhouse gas balance of a drained fen peatland is mainly controlled by land-use rather than soil organic carbon content. *Biogeosciences*, 12, 5161-5184. https://doi.org/10.5194/bg-12-5161-2015

Hao, Q., Wang, Y., Song, C. & Huang, Y. (2006). Contribution of winter fluxes to the annual CH4, CO2 and N2O emissions from freshwater marshes in the Sanjiang Plain. *Journal of Environmental Sciences*, 18, 270-275. https://doi.org/1001-0742(2006)02-0270-06

Herbst, M., Friborg, T., Schelde, K., Jensen, R., Ringgaard, R., Vasquez, V., Thomsen, A. G. & Soegaard, H. (2013). Climate and site management as driving factors for the atmospheric greenhouse gas exchange of a restored wetland. *Biogeosciences*, 10, 39-52. https://doi.org/10.5194/bg-10-39-2013

Järveoja, J., Peichl, M., Maddison, M., Soosaar, K., Vellak, K., Karofeld, E., Teemusk, A. & Mander, Ü. (2016). Impact of water table level on annual carbon and greenhouse gas balances of a restored peat extraction area. *Biogeosciences*, 13, 2637-2651. https://doi.org/10.5194/bg-13-2637-2016

Jauhiainen, J., Silvennoinen, H., Hämäläinen, R., Kusin, K., Limin, S., Raison, R. J. & Vasander, H. (2012). Nitrous oxide fluxes from tropical peat with different disturbance history and management. *Biogeosciences*, 9, 1337-1350. https://doi.org/10.5194/bg-9-1337-2012

Jiang, C., Wang, Y., Hao, Q. & Song, C. (2009). Effect of land-use change on CH4 and N2O emissions from freshwater marsh in Northeast China. *Atmospheric Environment*, 43, 3305-3309. https://doi.org/10.1016/j.atmosenv.2009.04.020

Kandel, T. P., Lærke, P. E. & Elsgaard, L. (2018). Annual emissions of CO2, CH4 and N2O from a temperate peat bog: Comparison of an undrained and four drained sites under permanent grass and arable crop rotations with cereals and potato. *Agricultural and Forest Meteorology*, 256-257, 470-481. https://doi.org/10.1016/j.agrformet.2018.03.021

Laine, J., Silvola, J., Tolonen, K., Alm, J., Nykänen, H., Vasander, H., Sallantaus, T., Savolainen, I., Sinisalo, J. & Martikainen, P. J. (1996). Effect of water-level drawdown on global climatic warming: Northern peatlands. *Ambio*, 25, 179-184. https://doi.org/10.2307/4314450

Langeveld, C. A., Segers, R., Dirks, B. O. M., van den Pol-van Dasselaar, A., Velthof, G. L. & Hensen, A. (1997). Emissions of CO2, CH4 and N2O from pasture on drained peat soils in the Netherlands. *European Journal of Agronomy*, 7, 35-42. https://doi.org/10.1016/S1161-0301(97)00036-1

Lohila, A., Minkkinen, K., Aurela, M., Tuovinen, J. P., Penttilä, T., Ojanen, P. & Laurila, T. (2011). Greenhouse gas flux measurements in a forestry-drained peatland indicate a large carbon sink. *Biogeosciences*, 8, 3203-3218. https://doi.org/10.5194/bg-8-3203-2011

Ma, W., Alhassan, A.-R. M., Wang, Y., Li, G., Wang, H. & Zhao, J. (2018). Greenhouse gas emissions as influenced by wetland vegetation degradation along a moisture gradient on the eastern Qinghai-Tibet Plateau of North-West China. *Nutrient Cycling in Agroecosystems*, 112, 335-354. https://doi.org/10.1007/s10705-018-9950-6

Maljanen, M., Hytönen, J. & Martikainen, P. J. (2010). Cold-season nitrous oxide dynamics in a drained boreal peatland differ depending on land-use practice. *Canadian Journal of Forest Research*, 40, 565-572. https://doi.org/10.1139/x10-004

Melling, L., Hatano, R. & Goh, K. J. (2007). Nitrous oxide emissions from three ecosystems in tropical peatland of Sarawak, Malaysia. *Soil Science and Plant Nutrition*, 53, 792-805. https://doi.org/10.1111/j.1747-0765.2007.00196.x

Mojeremane, W., Rees, R. M. & Mencuccini, M. (2011). The effects of site preparation practices on carbon dioxide, methane and nitrous oxide fluxes from a peaty gley soil. *Forestry*, 85, 1-15. https://doi.org/10.1093/forestry/cpr049

Song, C., Xu, X., Tian, H. & Wang, Y. (2009). Ecosystem-atmosphere exchange of CH4 and N2O and ecosystem respiration in wetlands in the Sanjiang Plain, Northeastern China. *Global Change Biology*, 15, 692-705. https://doi.org/10.1111/j.1365-2486.2008.01821.x

Song, L., Yao, Y., Gao, W., Cai, T., Wang, Q., Fu, D., Sun, X., Liang, H. & Gao, D. (2019). Effects of environmental variables on spatiotemporal variations of nitrous oxide fluxes in the pristine riparian marsh, Northeast China. *Wetlands*, 39, 619-631. https://doi.org/10.1007/s13157-018-1109-3

Takakai, F., Morishita, T., Hashidoko, Y., Darung, U., Kuramochi, K., Dohong, S., H. Limin, S. & Hatano, R. (2006). Effects of agricultural land-use change and forest fire on N2O emission from tropical peatlands, Central Kalimantan, Indonesia. *Soil Science and Plant Nutrition*, 52, 662-674. https://doi.org/10.1111/j.1747-0765.2006.00084.x

Yamulki, S., Anderson, R., Peace, A. & Morison, J. I. L. (2013). Soil CO2 CH4 and N2O fluxes from an afforested lowland raised peatbog in Scotland: implications for drainage and restoration. *Biogeosciences*, 10, 1051-1065. <https://doi.org/10.5194/bg-10-1051-2013>

# **References for summarizing global net annual greenhouse gas emissions from peatland caused by anthropogenic drainage activities**

1. Leifeld, J. & Menichetti, L. The underappreciated potential of peatlands in global climate change mitigation strategies. *Nat. Commun.* **9**, 1071, (2018).

2. Leifeld, J. et al. Intact and managed peatland soils as a source and sink of GHGs from 1850 to 2100. *Nat. Clim. Change* **9**, 945-947, (2019).

3. Carlson, K. M. et al. Greenhouse gas emissions intensity of global croplands. *Nature Climate Change* **7**, 63-68, (2016).

4. Tubiello, F. et al. A Worldwide Assessment of Greenhouse Gas Emissions from Drained Organic Soils. *Sustainability* **8**, (2016).

5. Evans, C. D. et al. Overriding water table control on managed peatland greenhouse gas emissions. *Nature* **593**, 548-552, (2021).

6. Joosten, H. The Global Peatland CO2 Picture: Peatland Status and Drainage Related Emissions in All Countries of the World (Wetland International, Ede, The Netherlands, 2010). (2010).4. Huang, Y. et al. Tradeoff of CO2 and CH4 emissions from global peatlands under water-table drawdown. *Nat. Clim. Change*, (2021).

7. Huang, Y. et al. Tradeoff of CO2 and CH4 emissions from global peatlands under water-table drawdown. *Nat. Clim. Change*, (2021).

# **References for areas of drained peatland as categorized by climate and land-use**

1. Günther, A. et al. Prompt rewetting of drained peatlands reduces climate warming despite methane emissions. *Nat. Commun.* **11**, 1644, (2020).

2. Leifeld, J. & Menichetti, L. The underappreciated potential of peatlands in global climate change mitigation strategies. *Nat. Commun.* **9**, 1071, (2018).

# **References for global warming potentials of CH4 and N2O relative to CO2**

8. IPCC, 2013. Climate change 2013: The Physical Science Basis. In: Stocker, T. F. et al. (Eds.), Contribution of Working Group I to the Fifth Assessment Report of the Intergovernmental Panel on Climate Change. Cambridge University Press, Cambridge, United Kingdom and New York, NY, USA, pp. 505–510, (2013).
