# Supplementary material for: Declines of peatland water table forces climate warming despite methane emission drawdown
Source: Research Square preprint supplement (doi:10.21203/rs.3.rs-2839705/v1), 2023-05-08
Supplement: Supplementary file 5 [file a65f8276a191a6235fb69160.xlsx]

## Sheet: Sheet1
References	Treatment	Drainage Purpose	Climatic conditions	Ditches area percent (%)			References
Strack and Zuback, 2013	Drained	Peat extraction	Temperate	4.8			Strack and Zuback, 2013. Annual carbon balance of a peatland 10 yr following restoration
Minkkinen et al. 2018	Drained	Forestry	Boreal	2.5			Minkkinen et al. 2018. Persistent carbon sink at a boreal drained bog forest
IPCC 2014	Deep-drained	Grassland	Temperate	21			IPCC 2014
IPCC 2014	Deep-drained	Grassland	Temperate	25			IPCC 2014
IPCC 2014	Deep-drained	Grassland	Temperate	6			IPCC 2014
IPCC 2014	Deep-drained	Grassland	Temperate	4			IPCC 2014
IPCC 2014	Deep-drained	Grassland	Temperate	4			IPCC 2014
IPCC 2014	Deep-drained	Grassland	Temperate	4			IPCC 2014
IPCC 2014	Deep-drained	Grassland	Temperate	5			IPCC 2014
IPCC 2014	Shallow-drained	Grassland	Temperate	25			IPCC 2014
IPCC 2014	Shallow-drained	Grassland	Temperate	6			IPCC 2014
IPCC 2014	Shallow-drained	Grassland	Temperate	25			IPCC 2014
IPCC 2014	Shallow-drained	Grassland	Temperate	10			IPCC 2014
IPCC 2014	Drained	Forestry	Temperate	3			IPCC 2014
IPCC 2014	Drained	Forestry	Boreal	3			IPCC 2014
IPCC 2014	Drained	Forestry	Boreal	2			IPCC 2014
IPCC 2014	Drained	Forestry	Boreal	4			IPCC 2014
IPCC 2014	Drained	Forestry	Temperate	3			IPCC 2014
IPCC 2014	Drained	Forestry	Boreal	1			IPCC 2014
IPCC 2014	Drained	Forestry	Boreal	1			IPCC 2014
IPCC 2014	Drained	Forestry	Temperate	3			IPCC 2014
IPCC 2014	Drained	Forestry	Temperate	2			IPCC 2014
IPCC 2014	Drained	Forestry	Boreal	3			IPCC 2014
IPCC 2014	Drained	Peat extraction	Boreal	2			IPCC 2014
IPCC 2014	Drained	Peat extraction	Temperate	3			IPCC 2014
IPCC 2014	Drained	Peat extraction	Boreal	4			IPCC 2014
IPCC 2014	Drained	Peat extraction	Boreal	4			IPCC 2014
IPCC 2014	Drained	Peat extraction, bare peat, abandoned	Boreal	6			IPCC 2014
IPCC 2014	Drained	Peat extraction, bare peat, abandoned	Temperate	5			IPCC 2014
IPCC 2014	Drained	Peat extraction	Temperate	3			IPCC 2014
IPCC 2014	Drained	Agriculture, abandoned	Tropical	2			IPCC 2014
IPCC 2014	Drained	Agriculture	Tropical	2			IPCC 2014
Paul et al. 2018	Drained	Agriculture	Temperate	5			Paul et al. 2018. Assessing the role of artificially drained agricultural land for climate change mitigation in Ireland
Paul et al. 2018	Drained	Agriculture	Temperate	5			Paul et al. 2018. Assessing the role of artificially drained agricultural land for climate change mitigation in Ireland
Paul et al. 2018	Shallow-drained	Grassland	Temperate	5			Paul et al. 2018. Assessing the role of artificially drained agricultural land for climate change mitigation in Ireland
Paul et al. 2018	Deep-drained	Grassland	Temperate	5			Paul et al. 2018. Assessing the role of artificially drained agricultural land for climate change mitigation in Ireland
Paul et al. 2018	Shallow-drained	Grassland	Temperate	5			Paul et al. 2018. Assessing the role of artificially drained agricultural land for climate change mitigation in Ireland
Paul et al. 2018	Deep-drained	Grassland	Temperate	5			Paul et al. 2018. Assessing the role of artificially drained agricultural land for climate change mitigation in Ireland
Von Arnold et al. 2005	Drained	Forestry	Temperate	1			Von Arnold et al. 2005. Fluxes of CO2, CH4 and N2O from drained coniferous forests on organic soils
Von Arnold et al. 2005	Drained	Forestry	Temperate	1			Von Arnold et al. 2005. Fluxes of CO2, CH4 and N3O from drained coniferous forests on organic soils
Koskinene et al. 2016	Drainage	Forestry	Boreal	3			Koskinene et al. 2016. High methane emissions from restored Norway spruce swamps in southern Finland over one growing season
Dommain et al. 2018	Drainage	Agriculture	Tropical	3.7			Dommain et al. 2018. A radiative forcing analysis of tropical peatlands before and after their conversion to agricultural plantations
Dommain et al. 2018	Drainage	Agriculture	Tropical	4.3			Dommain et al. 2018. A radiative forcing analysis of tropical peatlands before and after their conversion to agricultural plantations
Köhn et al. 2021	Drainage	Grassland	Temperate	1.52			Köhn et al. 2021. Drainage Ditches Contribute Considerably to the CH4 Budget of a Drained and a Rewetted Temperate Fen
Köhn et al. 2021	Drainage	Grassland	Temperate	1.52			Köhn et al. 2021. Drainage Ditches Contribute Considerably to the CH4 Budget of a Drained and a Rewetted Temperate Fen
Luan and Wu, 2015	Drainage	Grassland	Boreal	5			Luan and Wu, 2015. Long-term agricultural drainage stimulates CH4 emissions from ditches through increased substrate availability in a boreal peatland
Korkiakoski et al. 2020	Drained	Forestry	Temperate	2.4			Korkiakoski et al. 2020. Impact of partial harvest on CH4 and N2O balances of a drained boreal peatland forest
Korkiakoski et al. 2020	Drained	Forestry	Temperate	2.4			Korkiakoski et al. 2020. Impact of partial harvest on CH4 and N2O balances of a drained boreal peatland forest
Arn The et al. 2011	Drained	Grassland	Mediterranean	5			Arn The et al. 2011. Large Greenhouse Gas Emissions from a Temperate Peatland Pasture
Peacock et al. 2017	Drained	Grassland	Temperate	1.7			Peacock et al. 2017. Management effects on greenhouse gas dynamics in fen ditches
Peacock et al. 2017	Drained	Agriculture	Temperate	2			Peacock et al. 2017. Management effects on greenhouse gas dynamics in fen ditches
Arina et al. 2010	Drained	Grassland	Temperate	21			Arina et al. 2010. Methane emissions in two drained peat agro-ecosystems with high and low agricultural intensity
Arina et al. 2010	Drained	Grassland	Temperate	21			Arina et al. 2010. Methane emissions in two drained peat agro-ecosystems with high and low agricultural intensity
Hyvönen et al. 2013	Drained	Peat extraction	Boreal	6			Hyvönen et al. 2013. The role of drainage ditches in greenhouse gas emissions and surface leaching losses from a cutaway peatland cultivated with a perennial bioenergy crop
Hyvönen et al. 2013	Drained	Peat extraction	Boreal	6			Hyvönen et al. 2013. The role of drainage ditches in greenhouse gas emissions and surface leaching losses from a cutaway peatland cultivated with a perennial bioenergy crop
Hyvönen et al. 2013	Drained	Peat extraction	Boreal	6			Hyvönen et al. 2013. The role of drainage ditches in greenhouse gas emissions and surface leaching losses from a cutaway peatland cultivated with a perennial bioenergy crop
Hyvönen et al. 2013	Drained	Peat extraction	Boreal	6			Hyvönen et al. 2013. The role of drainage ditches in greenhouse gas emissions and surface leaching losses from a cutaway peatland cultivated with a perennial bioenergy crop
Hyvönen et al. 2013	Drained	Peat extraction	Boreal	6			Hyvönen et al. 2013. The role of drainage ditches in greenhouse gas emissions and surface leaching losses from a cutaway peatland cultivated with a perennial bioenergy crop
Hyvönen et al. 2013	Drained	Peat extraction	Boreal	6			Hyvönen et al. 2013. The role of drainage ditches in greenhouse gas emissions and surface leaching losses from a cutaway peatland cultivated with a perennial bioenergy crop
Hyvönen et al. 2013	Drained	Peat extraction	Boreal	6			Hyvönen et al. 2013. The role of drainage ditches in greenhouse gas emissions and surface leaching losses from a cutaway peatland cultivated with a perennial bioenergy crop
Hyvönen et al. 2013	Drained	Peat extraction	Boreal	6			Hyvönen et al. 2013. The role of drainage ditches in greenhouse gas emissions and surface leaching losses from a cutaway peatland cultivated with a perennial bioenergy crop
Huotari et al. 2013	Drained		Boreal	4.4			Huotari et al. 2013. Effect of catchment characteristics on aquatic carbon export from a boreal catchment and its importance in regional carbon cycling
