# Supplementary material for: Declines of peatland water table forces climate warming despite methane emission drawdown
Source: Research Square preprint supplement (doi:10.21203/rs.3.rs-2839705/v1), 2023-05-08
Supplement: Supplementary file 6 [file e3c2b89d2b8aeb92438cc43f.xlsx]

## Sheet: Data_soil core
Study ID	References	Drainage (treatment)	Purpose	Peat depth (m) in pristine wetland	N rate (kg N ha-1) in drained wetland	Biomass/manure application (t ha-1) in drained wetland	Country	Latitude (°)	Longitude (°)	Latitude (°, N)	Longitude (°, E)	Altitude (m)	MAT ( °C)	MAP (mm)	Climatic conditions	Drainage duration (years)	Drainage intensity	Wetland type	Nutrient supply type	Microtopography	Permanently/seasonally flooded	Dominant plant species in prestine wetland	Function group	Soil type	Soil texture	Measurement period	Season	Dry/wet compared to the long-term mean MTP	Measurement frequency	Method	Notes for method	Soil organic carbon	Soil depth (cm)	Control	SD	n	CV	Treatment	SD	n	CV	LnRR	Variance	Soil depth (cm)	Control	SD	n	Treatment	SD
1	Gao et al. 2016	Low drainage	Hydrology simulation	3	0	0	China	32.933	102.133	32°56′	102°08′	3300	0.35	680	Temperate	1	/	Peatland (fen)	/	/	seasonally	Carex Muliensis	Cyperaceae	/	/	2015/05-10	Growing season	/	Weekly	Laboratory, Chamber	Mesocosm experiment			/	/	/		/	/	/					/	/	/	/	/
1	Gao et al. 2016	High drainage	Hydrology simulation	3	0	0	China	32.933	102.133	32°56′	102°08′	3300	0.35	680	Temperate	1	/	Peatland (fen)	/	/	seasonally	Carex Muliensis	Cyperaceae	/	/	2015/05-10	Growing season	/	Weekly	Laboratory, Chamber	Mesocosm experiment			/	/	/		/	/	/					/	/	/	/	/
2	Wang et al. 2016a	Drainage	Hydrology simulation	3	0	0	China	33.9	102.6	33°54′	102°36′	3500	1.1	752	Temperate	1	/	Peatland (fen)	/	/	seasonally	Carex Muliensis	Cyperaceae	/	/	2014/08/05-10/02	Growing season	/	Weekly	Laboratory, Chamber	Mesocosm experiment	g kg-1	0-10	253.92	11.81	4	0.0465107	/	/	/					/	/	/	/	/
3	Wan et al. 2013	Low drainage	Hydrology simulation	/	0	0	China	47.583	133.517	47°35′	133°31′	/	1.9	600	Temperate	1	/	Marsh	/	overall	permanently	Calamagrostis angustifolia	Graminoid	Meadow boggy soil	/	2008/08	/	/	only once	Laboratory, Chamber	Soil core incubation			/	/	/		/	/	/					/	/	/	/	/
3	Wan et al. 2013	High drainage	Hydrology simulation	/	0	0	China	47.583	133.517	47°35′	133°31′	/	1.9	600	Temperate	1	/	Marsh	/	overall	permanently	Calamagrostis angustifolia	Graminoid	Meadow boggy soil	/	2008/08	/	/	only once	Laboratory, Chamber	Soil core incubation			/	/	/		/	/	/					/	/	/	/	/
3	Wan et al. 2013	Low drainage	Hydrology simulation	/	0	0	China	47.583	133.517	47°35′	133°31′	/	1.9	600	Temperate	1	/	Marsh	/	overall	permanently	Calamagrostis angustifolia	Graminoid	Meadow boggy soil	/	2008/08	/	/	only once	Laboratory, Chamber	Soil core incubation			/	/	/		/	/	/					/	/	/	/	/
3	Wan et al. 2013	High drainage	Hydrology simulation	/	0	0	China	47.583	133.517	47°35′	133°31′	/	1.9	600	Temperate	1	/	Marsh	/	overall	permanently	Calamagrostis angustifolia	Graminoid	Meadow boggy soil	/	2008/08	/	/	only once	Laboratory, Chamber	Soil core incubation			/	/	/		/	/	/					/	/	/	/	/
4	Kim et al. 2008	Drainage	Hydrology simulation	/	0	0	UK	52.969	-3.819	52.969°	3.819° W	/	/	/	Temperate	1-month	/	Peatland (bog)	ombrotrophic	overall	seasonally	Sphagnum papillosum	Peat moss	Peat soil	/	2006	/	/	/	Laboratory, Chamber	Soil core incubation			/	/	/		/	/	/					/	/	/	/	/
4	Kim et al. 2008	Drainage	Hydrology simulation	/	0	0	UK	53.308	-4.253	53.308°	4.253° W	/	/	/	Temperate	1-month	/	Peatland (fen)	minerotrophic	overall	seasonally	Sphagnum spp	Peat moss	Peat soil	/	2006	/	/	/	Laboratory, Chamber	Soil core incubation			/	/	/		/	/	/					/	/	/	/	/
4	Kim et al. 2008	Drainage	Hydrology simulation	/	0	0	UK	53.126	-4.02	53.126°	4.020° W	/	/	/	Temperate	1-month	/	Riparian	/	overall	permanently	Juncus spp.	Graminoid	Peat soil	/	2006	/	/	/	Laboratory, Chamber	Soil core incubation			/	/	/		/	/	/					/	/	/	/	/
5	Urbanová et al. 2011	Drainage	Forestry	/	0	0	Czech Republic	48.972	13.634	48.972°	13.634°	850	4	1100	Temperate	50	/	Peatland (fen)	minerotrophic	overall	seasonally	Carex rostrata	Cyperaceae	Peat soil	/	2008	/	/	1-2 week intervals	Laboratory, Chamber	Soil core incubation	g kg-1	0-30	434	2	3	0.00460829	328	43	3	0.131098	-0.280031	0.00573594		/	/	/	/	/
5	Urbanová et al. 2011	Drainage	Forestry	/	0	0	Czech Republic	48.984	13.694	48.972°	13.634°	1150	3.2	1400	Temperate	50	/	Peatland (bog)	ombrotrophic	overall	seasonally	Trichophorum caespitosum, Andromeda polifolia	Cyperaceae	Peat soil	/	2008	/	/	1-2 week intervals	Laboratory, Chamber	Soil core incubation	g kg-1	0-30	479	15	3	0.0313152	482	6	3	0.0124481	0.00624352	0.000378533		/	/	/	/	/
5	Urbanová et al. 2011	Drainage	Forestry	/	0	0	Czech Republic	48.972	13.634	48.972°	13.634°	850	4	1100	Temperate	50	/	Peatland (bog)	ombrotrophic	overall	seasonally	Trichophorum caespitosum, Andromeda polifolia	Cyperaceae	Peat soil	/	2008	/	/	1-2 week intervals	Laboratory, Chamber	Soil core incubation	g kg-1	0-30	479	15	3	0.0313152	484	15	3	0.0309917	0.0103843	0.000647044		/	/	/	/	/
6	Yang et al. 2013	Drainage	Forestry	0.35	0	0	China	47.588	133.53	47°35.29′	133°31.81′	/	-1.9	350	Boreal	3-month	/	Marsh	minerotrophic	overall	seasonally	Deyeucia angustifolia	Graminoid	Gley soil	/	2005/7/7-9/27	Growing season	/	weekly	Laboratory, Chamber	Microcosm	g kg-1		/	/	/		/	/	/					/	/	/	/	/
7	Johnson et al. 1996	Drainage	Forestry	0.2	0	0	USA	68.633	-149.567	68°38′	149°34′W	760	/	230	Boreal	3-month	/	Tundra	minerotrophic	hummock	seasonally	Eriophorum vaginatum	Cyperaceae	Peat soil	/	1993/05-07	Growing season	/	once per week	Laboratory, Chamber	Microcosm	g kg-1	0-5	128.12	7.29004	2	0.0569001	/	/	/					/	/	/	/	/
7	Johnson et al. 1996	Drainage	Forestry	0.2	0	0	USA	68.633	-149.567	68°38′	149°34′W	760	/	230	Boreal	3-month	/	Tundra	minerotrophic	lawn	seasonally	Sphagnum spp.	Peat moss	Peat soil	/	1993/05-07	Growing season	/	once per week	Laboratory, Chamber	Microcosm	g kg-1	0-5	125.817	22.7917	2	0.18115	/	/	/					/	/	/	/	/
8	Gao et al. 2014	Drainage	Hydrology simulation	2.5	0	0	China	33.9	102.6	33°54′	102°36′	3500	1.1	753	Temperate	6-week	/	Peatland (bog)	minerotrophic	overall	permanently	Carex muliensis	Cyperaceae	Peat soil	/	2012	/	/	4 day-interval	Laboratory, Chamber	Soil core incubation	g kg-1	0-10	252.51	20.1	4	0.0796008	/	/	/				10-20	229.89	33.82	4	/	/
9	Yang et al. 2014	Drainage	Hydrology simulation	0.3-10	0	0	China	33.85	102.5	33°51′	102°30′	3600	1.4	700	Temperate	5-month	/	Peatland (fen)	/	overall	seasonally	Carex muliensis, Caltha palustris, Gentiana formosa	Cyperaceae	Peat soil	Sand	2009/6-10	Growing season	/	weekly	Laboratory, Chamber	Mesocosm experiment	mg L-1	0-10	58.6	2.13273	3		/	/	/					/	/	/	/	/
9	Yang et al. 2014	Drainage	Hydrology simulation	0.3-10	0	0	China	33.85	102.5	33°51′	102°30′	3600	1.4	700	Temperate	5-month	/	Peatland (fen)	/	overall	seasonally	Carex muliensis, Caltha palustris, Gentiana formosa	Cyperaceae	Peat soil	Sand	2009/6-10	Growing season	/	weekly	Laboratory, Chamber	Mesocosm experiment	mg L-1	0-10	58.6	2.13273	3		/	/	/					/	/	/	/	/
9	Yang et al. 2014	Drainage	Hydrology simulation	0.3-10	0	0	China	33.85	102.5	33°51′	102°30′	3600	1.4	700	Temperate	5-month	/	Peatland (fen)	/	overall	seasonally	Carex muliensis, Caltha palustris, Gentiana formosa	Cyperaceae	Peat soil	Sand	2009/6-10	Growing season	/	weekly	Laboratory, Chamber	Mesocosm experiment	mg L-1	0-10	58.6	2.13273	3		/	/	/					/	/	/	/	/
9	Yang et al. 2014	Drainage	Hydrology simulation	0.3-10	0	0	China	33.85	102.5	33°51′	102°30′	3600	1.4	700	Temperate	5-month	/	Peatland (fen)	/	overall	seasonally	Carex muliensis, Caltha palustris, Gentiana formosa	Cyperaceae	Peat soil	Sand	2009/6-10	Growing season	/	weekly	Laboratory, Chamber	Mesocosm experiment	mg L-1	0-10	58.6	2.13273	3		/	/	/					/	/	/	/	/
10	Hu et al. 2017	Drainage	Agriculture	/	0	0	USA	26.933	-80.8	26°56′	80°48′W	/	24	1330	Tropical	168-day	/	/	/	overall	permanently	Saccharum spp.	Graminoid	/	/	2013	/	/	twice per week	Laboratory, Chamber	Soil core incubation	g kg-1	0-10	431	3.4641	3	0.00803736	/	/	/				10-30	426	12.1244	3	/	/
10	Hu et al. 2017	Drainage	Agriculture	/	0	0	USA	26.933	-80.8	26°56′	80°48′W	/	24	1330	Tropical	168-day	/	/	/	overall	permanently	Saccharum spp.	Graminoid	/	/	2013	/	/	twice per week	Laboratory, Chamber	Soil core incubation	g kg-1	0-10	431	3.4641	3	0.00803736	/	/	/				10-30	426	12.1244	3	/	/
10	Hu et al. 2017	Drainage	Agriculture	/	0	0	USA	26.933	-80.8	26°56′	80°48′W	/	24	1330	Tropical	168-day	/	/	/	overall	permanently	Saccharum spp.	Graminoid	/	/	2013	/	/	twice per week	Laboratory, Chamber	Soil core incubation	g kg-1	0-10	431	3.4641	3	0.00803736	/	/	/				10-30	426	12.1244	3	/	/
10	Hu et al. 2017	Drainage	Agriculture	/	0	0	USA	26.933	-80.8	26°56′	80°48′W	/	24	1330	Tropical	168-day	/	/	/	overall	permanently	Saccharum spp.	Graminoid	/	/	2013	/	/	twice per week	Laboratory, Chamber	Soil core incubation	g kg-1	0-10	431	3.4641	3	0.00803736	/	/	/				10-30	426	12.1244	3	/	/
10	Hu et al. 2017	Drainage	Agriculture	/	0	0	USA	26.933	-80.8	26°56′	80°48′W	/	24	1330	Tropical	168-day	/	/	/	overall	permanently	Saccharum spp.	Graminoid	/	/	2013	/	/	twice per week	Laboratory, Chamber	Soil core incubation	g kg-1	0-10	431	3.4641	3	0.00803736	/	/	/				10-30	426	12.1244	3	/	/
11	Hribljan et al. 2017	Drainage	Hydrology simulation	/	0	0	USA	46.183	-86.017	46°11′	86°01′W	207	5.1	810	Temperate	80	/	Peatland (fen)	ombrotrophic	hummock	seasonally	Sphagnum fallax	Peat moss	Peat soil	/	2011	/	/	/	Laboratory, Chamber	Soil core incubation	g kg-1	0-5	476	9.79796	6	0.0205839	482	9.79796	6	0.0203277	0.0125263	0.000139486		/	/	/	/	/
11	Hribljan et al. 2017	Drainage	Hydrology simulation	/	0	0	USA	46.183	-86.017	46°11′	86°01′W	207	5.1	810	Temperate	80	/	Peatland (fen)	ombrotrophic	lawn	seasonally	Sphagnum fallax	Peat moss	Peat soil	/	2011	/	/	/	Laboratory, Chamber	Soil core incubation	g kg-1	0-5	471	7.34847	6	0.0156018	482	7.34847	6	0.0152458	0.023086	7.93086e-05		/	/	/	/	/
12	Chimner and Copper, 2003	Drainage	Hydrology simulation	2.3	0	0	USA	40.333	-105.709	40.333°	105.709° W	2655	0.8	650	Temperate	1-month	/	Peatland (fen)	minerotrophic	overall	permanently	Carex aquatilis, Carex utriculata	Cyperaceae	Peat soil	/	1997	/	/	weekly	Laboratory, Chamber	Soil core incubation			/	/	/		/	/	/					/	/	/	/	/
12	Chimner and Copper, 2003	Drainage	Hydrology simulation	2.3	0	0	USA	40.333	-105.709	40.333°	105.709° W	2655	0.8	650	Temperate	1-month	/	Peatland (fen)	minerotrophic	overall	permanently	Carex aquatilis, Carex utriculata	Cyperaceae	Peat soil	/	1997	/	/	weekly	Laboratory, Chamber	Soil core incubation			/	/	/		/	/	/					/	/	/	/	/
12	Chimner and Copper, 2003	Drainage	Hydrology simulation	2.3	0	0	USA	40.333	-105.709	40.333°	105.709° W	2655	0.8	650	Temperate	1-month	/	Peatland (fen)	minerotrophic	overall	permanently	Carex aquatilis, Carex utriculata	Cyperaceae	Peat soil	/	1997	/	/	weekly	Laboratory, Chamber	Soil core incubation			/	/	/		/	/	/					/	/	/	/	/
13	Wang et al. 2016b	Drainage	Hydrology simulation	/	0	0	China	37.583	101.333	37°35′	101°20′	3250	-1.1	480	Temperate	3-month	/	Peatland (fen)	/	overall	/	Carex pamirensis	Cyperaceae	/	/	2011/06-09	Growing season	/	biweekly	Laboratory, Chamber	Mesocosm experiment	g kg-1	0-10	162	5.89595	10		/	/	/					/	/	/	/	/
13	Wang et al. 2016b	Drainage	Hydrology simulation	/	0	0	China	37.583	101.333	37°35′	101°20′	3250	-1.1	480	Temperate	3-month	/	Peatland (fen)	/	overall	/	Carex pamirensis	Cyperaceae	/	/	2012/06-09	Growing season	/	biweekly	Laboratory, Chamber	Mesocosm experiment	g kg-1	0-10	162	5.89595	10		/	/	/					/	/	/	/	/
13	Wang et al. 2016b	Drainage	Hydrology simulation	/	0	0	China	37.583	101.333	37°35′	101°20′	3250	-1.1	480	Temperate	3-month	/	Peatland (fen)	/	overall	/	Carex pamirensis	Cyperaceae	/	/	2013/06-09	Growing season	/	biweekly	Laboratory, Chamber	Mesocosm experiment	g kg-1	0-10	162	5.89595	10		/	/	/					/	/	/	/	/
14	Berryman et al. 2009	Drainage	Hydrology simulation	/	0	0	USA	46.85	-95.817	46°51′	95°49′ W	/	/	705	Temperate	/	/	Marsh	/	overall	seasonally	/	/	/	/	2004-2005	/	/	/	Laboratory, Chamber	Soil core incubation	g kg-1	0-15	271.462	9.87978	3		/	/	/					/	/	/	/	/
14	Berryman et al. 2009	Drainage	Hydrology simulation	/	0	0	USA	46.85	-95.817	46°51′	95°49′ W	/	/	705	Temperate	/	/	Marsh	/	overall	seasonally	/	/	/	/	2004-2005	/	/	/	Laboratory, Chamber	Soil core incubation	g kg-1	0-15	138.051	5.02433	3		/	/	/					/	/	/	/	/
15	Regina et al. 1999	Drainage	Hydrology simulation	/	0	0	Finland	62.5	25.5	62°30′00″	25°30′00″	/	/	/	Boreal	7-month	/	Peatland (fen)	minerotrophic	overall	seasonally	Betula nana, Carex lasiocarpa, Andromeda polifolia	Shrub	/	/	1994/12-1995/6	/	/	monthly	Laboratory, Chamber	Soil core incubation			/	/	/		/	/	/					/	/	/	/	/
15	Regina et al. 1999	Drainage	Hydrology simulation	/	0	0	Finland	62	28	62°00′00″	25°00′00″	/	/	/	Boreal	7-month	/	Peatland (fen)	ombrotrophic	hummock	seasonally	Sphagnum fuscum, Sphagnum angustifolium, Eriophorum vaginatum	Peat moss	/	/	1994/12-1995/6	/	/	monthly	Laboratory, Chamber	Soil core incubation			/	/	/		/	/	/					/	/	/	/	/
15	Regina et al. 1999	Drainage	Hydrology simulation	/	0	0	Finland	62	28	62°00′00″	25°00′00″	/	/	/	Boreal	7-month	/	Peatland (fen)	ombrotrophic	hollow	seasonally	Sphagnum majus, Sphagnum balticum, Sphagnum angustifolium	Peat moss	/	/	1994/12-1995/6	/	/	monthly	Laboratory, Chamber	Soil core incubation			/	/	/		/	/	/					/	/	/	/	/
16	Henneberg et al. 2015	Low drainage	Hydrology simulation	/	0	0	Denmark	56.157	10.212	56°09′25.92″	10°12′38.52″	/	/	/	Temperate	2-month	/	Marsh	/	/	/	Juncus effuus	Graminoid	/	/	2013/08/13-15	/	/	daily	Laboratory, Chamber	Mesocosm experiment			/	/	/		/	/	/					/	/	/	/	/
16	Henneberg et al. 2015	High drainage	Hydrology simulation	/	0	0	Denmark	56.157	10.212	56°09′25.92″	10°12′38.52″	/	/	/	Temperate	2-month	/	Marsh	/	/	/	Juncus effuus	Graminoid	/	/	2013/08/13-15	/	/	daily	Laboratory, Chamber	Mesocosm experiment			/	/	/		/	/	/					/	/	/	/	/
17	Blodau et al. 2003	Drainage	Hydrology simulation	5	0	0	Canada	45.4	-75.5	45°24′	75°30′	/	/	/	Boreal	3-month	/	Peatland (bog)	ombrotrophic	hollow	seasonally	Sphagnum capillifolium, Sphagnum angustifolium, Sphagnum magellanicum and Polytrichum strictum	Peat moss	/	/	/	Growing season	/	/	Laboratory, Chamber	Soil core incubation			/	/	/		/	/	/					/	/	/	/	/
18	Jaatinen et al. 2005	Drainage	Forestry	2	0	0	Finland	61.783	24.3	61°47′	24°18′	150	3	709	Boreal	42	/	Peatland (fen)	minerotrophic	overall	seasonally	Eriophorum vaginatum	Cyperaceae	/	/	2003	Growing season	/	only once	Laboratory, Chamber	Soil core incubation			/	/	/		/	/	/					/	/	/	/	/
18	Jaatinen et al. 2005	Drainage	Forestry	2	0	0	Finland	61.783	24.3	61°47′	24°18′	150	3	709	Boreal	42	/	Peatland (bog)	ombrotrophic	overall	seasonally	Sphagnum angutifolium	Peat moss	/	/	2003	Growing season	/	only once	Laboratory, Chamber	Soil core incubation			/	/	/		/	/	/					/	/	/	/	/
19	Grünfeld and Brix, 1999	Drainage	Hydrology simulation	/	0	0	Denmark	56	10	56	10	/	/	/	/	3-month	/	Peatland (fen)	minerotrophic	overall	seasonally	Phragmites australis	graminoid	/	/	1996	/	/	only 4 days	Laboratory, Chamber	Soil core incubation	g kg-1		212.4	16.8	5	0.079096	208.8	15.6	5	0.0747126	-0.0170944	0.00236763		/	/	/	/	/
20	Kane et al. 2013	Drainage	Hydrology simulation	/	0	0	USA	64.82	-147.87	64.82°	147.87° W	/	-2.9	269	Boreal	2	/	Peatland (fen)	minerotrophic	overall	seasonally	Moss and Sphagnum	Peat moss	/	/	2007	/	/	weekly	Laboratory, Chamber	Soil core incubation	g kg-1		403.5	11.5966	8	0.0287399	417.6	12.4451	8	0.0298014	0.0343475	0.000214263	20-25	399.6	14.7078	8	394.6	21.2132
21	Moore and Dalva, 1993	Drainage	Forestry	1.4	0	0	Canada	45.067	-78.75	45°04′	78°45′W	/	4.4	1102	Temperate	1-month	/	Peatland (bog)	ombrotrophic	overall	seasonally	Sphagnum fuscum, Sphagnum magellanicum	Peat moss	/	/	1991	/	/	daily	Laboratory, Chamber	Soil core incubation				/	/		/	/	/					/	/	/	/	/
21	Moore and Dalva, 1993	Drainage	Forestry	1.3	0	0	Canada	54.8	-66.817	54°48′	66°49′W	/	/	/	Boreal	1-month	/	Peatland (fen)	minerotrophic	overall	seasonally	Carex rostrata, Carex Iimosa	Cyperaceae	/	/	1991	/	/	daily	Laboratory, Chamber	Soil core incubation				/	/		/	/	/					/	/	/	/	/
21	Moore and Dalva, 1993	Drainage	Forestry	1.6	0	0	Canada	45.533	-73.133	45°32′	73°08′W	/	/	/	Temperate	1-month	/	Swamp	/	overall	seasonally	Betula alleghaniensis, Tsuga canadensis	Forest	/	/	1991	/	/	daily	Laboratory, Chamber	Soil core incubation				/	/		/	/	/					/	/	/	/	/
21	Moore and Dalva, 1993	Drainage	Forestry	1.4	0	0	Canada	45.067	-78.75	45°04′	78°45′W	/	4.4	1102	Temperate	1-month	/	Peatland (bog)	ombrotrophic	overall	seasonally	Sphagnum fuscum, Sphagnum magellanicum	Peat moss	/	/	1991	/	/	daily	Laboratory, Chamber	Soil core incubation				/	/		/	/	/					/	/	/	/	/
21	Moore and Dalva, 1993	Drainage	Forestry	1.3	0	0	Canada	54.8	-66.817	54°48′	66°49′W	/	/	/	Boreal	1-month	/	Peatland (fen)	minerotrophic	overall	seasonally	Carex rostrata, Carex Iimosa	Cyperaceae	/	/	1991	/	/	daily	Laboratory, Chamber	Soil core incubation				/	/		/	/	/					/	/	/	/	/
21	Moore and Dalva, 1993	Drainage	Forestry	1.6	0	0	Canada	45.533	-73.133	45°32′	73°08′W	/	/	/	Temperate	1-month	/	Swamp	/	overall	seasonally	Betula alleghaniensis, Tsuga canadensis	Forest	/	/	1991	/	/	daily	Laboratory, Chamber	Soil core incubation				/	/		/	/	/					/	/	/	/	/
22	Aerts and Ludwig, 1997	Drainage	Hydrology simulation	/	0	0	Netherlands	52.017	5.683	52°01′	5°41′	/	/	/	Temperate	2-month	/	Peatland (fen)	minerotrophic	overall	seasonally	Carex acutiformis	Cyperaceae	/	/	/	/	/	weekly	Laboratory, Chamber	Soil core incubation	g kg-1		525.29	8.06265	10	0.0153489	/	/	/					/	/	/	/	/
22	Aerts and Ludwig, 1997	Drainage	Hydrology simulation	/	0	0	Netherlands	52.017	5.683	52°01′	5°41′	/	/	/	Temperate	2-month	/	Peatland (fen)	mesotrophic	overall	seasonally	Carex lasiocarpa	Cyperaceae	/	/	/	/	/	weekly	Laboratory, Chamber	Soil core incubation	g kg-1		511.659	12.355	10	0.0241469	/	/	/					/	/	/	/	/
23	Freeman et al. 1993	Drainage	Hydrology simulation	/	0	0	UK	51.502	-3.172	51.502°	3.172° W	/	/	/	Temperate	1-month	/	Peatland (fen)	minerotrophic	overall	seasonally	Sphagnum	Peat moss	/	/	/	/	/	monthly	Laboratory, Chamber	Soil core incubation			/	/	/		/	/	/					/	/	/	/	/
24	Dowrick et al. 1999	Drainage	Hydrology simulation	2	0	0	UK	52.467	-3.75	52°28′	3°45′W	/	/	/	Temperate	1-month	/	Peatland (bog)	ombrotrophic	overall	seasonally	Sphagnum and Juncus communities	Peat moss	/	/	1994	/	/	weekly	Field, Chamber	Soil core incubation			/	/	/		/	/	/					/	/	/	/	/
24	Dowrick et al. 1999	Drainage	Hydrology simulation	2	0	0	UK	52.467	-3.75	52°28′	3°45′W	/	/	/	Temperate	1-month	/	Peatland (bog)	ombrotrophic	overall	seasonally	Sphagnum and Juncus communities	Peat moss	/	/	1994	/	/	weekly	Field, Chamber	Soil core incubation			/	/	/		/	/	/					/	/	/	/	/
24	Dowrick et al. 1999	Drainage	Hydrology simulation	2	0	0	UK	52.467	-3.75	52°28′	3°45′W	/	/	/	Temperate	1-month	/	Peatland (bog)	ombrotrophic	overall	seasonally	Sphagnum and Juncus communities	Peat moss	/	/	1994	/	/	weekly	Field, Chamber	Soil core incubation			/	/	/		/	/	/					/	/	/	/	/
																																					0.0363947				0.0449464
[truncated: 496 more columns]

## Sheet: Data_in-situ
Study ID	References	Drainage (treatment)	Purpose	Peat depth (m) in pristine wetland	N rate (kg N ha-1) in drained wetland	Biomass/manure application (t ha-1) in drained wetland	Country	Latitude (°, N)	Longitude (°, E)	Latitude (°, N)	Longitude (°, E)	Altitude (m)	MAT ( °C)	MAP (mm)	Climatic conditions	Drainage duration (years)	Drainage intensity	Wetland type	Nutrient supply type	Microtopography	Permanently/seasonally flooded	Dominant plant species in prestine wetland	Function group	Soil type	Soil texture	Soil depth (cm)	pH in prestine wetland	Soil organic carbon	Soil depth (cm)	SOC in prestine wetland	STN	Soil depth (cm)	STN in prestine wetland	C/N	Soil depth (cm)	C/N in prestine wetland	Measurement period	Season	Growing season or wet season length	Dry/wet compared to the long-term mean MTP	Measurement frequency	Method	Soil organic carbon	Soil depth (cm)	Control	SD	n	CV	Treatment
1	Ma et al. 2017	Drainage	Forestry	/	0	0	China	48.065	128.51	48°03′53″	128°30′36″	260-500	0.4	630	Temperate	10	/	Marsh	minerotrophic	overall	seasonally	Carex Muliensis	Cyperaceae	Dark brown soil	/		/			/			/			/	2014/05/08-2015/04/28	Annual		/	11-day interval	Field, Chamber			/	/	/		/
1	Ma et al. 2017	Drainage	Forestry	/	0	0	China	48.065	128.51	48°03′53″	128°30′36″	260-500	0.4	630	Temperate	30	/	Marsh	minerotrophic	overall	seasonally	Carex Muliensis	Cyperaceae	Dark brown soil	/		/			/			/			/	2014/05/08-2015/04/28	Annual		/	11-day interval	Field, Chamber			/	/	/		/
1	Ma et al. 2017	Drainage	Forestry	/	0	0	China	48.065	128.51	48°03′53″	128°30′36″	260-500	0.4	630	Temperate	10	/	Marsh	minerotrophic	hummock	seasonally	Carex Muliensis	Cyperaceae	Dark brown soil	/		/			/			/			/	2014/05/08-2015/04/28	Annual		/	11-day interval	Field, Chamber			/	/	/		/
1	Ma et al. 2017	Drainage	Forestry	/	0	0	China	48.065	128.51	48°03′53″	128°30′36″	260-500	0.4	630	Temperate	10	/	Marsh	minerotrophic	hollow	seasonally	Carex Muliensis	Cyperaceae	Dark brown soil	/		/			/			/			/	2014/05/08-2015/04/28	Annual		/	11-day interval	Field, Chamber			/	/	/		/
1	Ma et al. 2017	Drainage	Forestry	/	0	0	China	48.065	128.51	48°03′53″	128°30′36″	260-500	0.4	630	Temperate	30	/	Marsh	minerotrophic	hummock	seasonally	Carex Muliensis	Cyperaceae	Dark brown soil	/		/			/			/			/	2014/05/08-2015/04/28	Annual		/	11-day interval	Field, Chamber			/	/	/		/
1	Ma et al. 2017	Drainage	Forestry	/	0	0	China	48.065	128.51	48°03′53″	128°30′36″	260-500	0.4	630	Temperate	30	/	Marsh	minerotrophic	hollow	seasonally	Carex Muliensis	Cyperaceae	Dark brown soil	/		/			/			/			/	2014/05/08-2015/04/28	Annual		/	11-day interval	Field, Chamber			/	/	/		/
2	Feng et al. 2009	Drainage	Forestry	/	0	0	China	48.065	128.51	48°03′53″	128°30′36″	260-500	0.4	630	Temperate	10	/	Marsh	minerotrophic	overall	seasonally	Carex Muliensis	Cyperaceae	Dark brown soil	/		/			/			/			/	2007/06-10	Growing season	June to October	/	11-day interval	Field, Chamber			/	/	/		/
2	Feng et al. 2009	Drainage	Forestry	/	0	0	China	48.065	128.51	48°03′53″	128°30′36″	260-500	0.4	630	Temperate	20	/	Marsh	minerotrophic	overall	seasonally	Carex Muliensis	Cyperaceae	Dark brown soil	/		/			/			/			/	2007/06-10	Growing season	June to October	/	11-day interval	Field, Chamber			/	/	/		/
2	Feng et al. 2009	Drainage	Forestry	/	0	0	China	48.065	128.51	48°03′53″	128°30′36″	260-500	0.4	630	Temperate	10	/	Marsh	minerotrophic	hummock	seasonally	Carex Muliensis	Cyperaceae	Dark brown soil	/		/			/			/			/	2007/06-10	Growing season	June to October	/	11-day interval	Field, Chamber			/	/	/		/
2	Feng et al. 2009	Drainage	Forestry	/	0	0	China	48.065	128.51	48°03′53″	128°30′36″	260-500	0.4	630	Temperate	10	/	Marsh	minerotrophic	hollow	seasonally	Carex Muliensis	Cyperaceae	Dark brown soil	/		/			/			/			/	2007/06-10	Growing season	June to October	/	11-day interval	Field, Chamber			/	/	/		/
2	Feng et al. 2009	Drainage	Forestry	/	0	0	China	48.065	128.51	48°03′53″	128°30′36″	260-500	0.4	630	Temperate	20	/	Marsh	minerotrophic	hummock	seasonally	Carex Muliensis	Cyperaceae	Dark brown soil	/		/			/			/			/	2007/06-10	Growing season	June to October	/	11-day interval	Field, Chamber			/	/	/		/
2	Feng et al. 2009	Drainage	Forestry	/	0	0	China	48.065	128.51	48°03′53″	128°30′36″	260-500	0.4	630	Temperate	20	/	Marsh	minerotrophic	hollow	seasonally	Carex Muliensis	Cyperaceae	Dark brown soil	/		/			/			/			/	2007/06-10	Growing season	June to October	/	11-day interval	Field, Chamber			/	/	/		/
3	Zhou et al. 2015	Drainage	Grassland	/	0	0	China	33.92	102.735	33°55.2′	102°44.1′	3432	0.9	656.8	Temperate	40	Deep drainage	Peatland (fen)	minerotrophic	overall	permanently	Carex Muliensis, Potamogeton pusillus	Cyperaceae	Peat soil	/	0-10	7.6	g kg-1	0-10	206.37	g kg-1	0-10	13.7		0-10	15.0635	2013/6-10	Growing season	May to September	/	biweekly	Field, Chamber	g kg-1	0-10	206.37	34.79	4	0.168581	148.26
3	Zhou et al. 2015	Drainage	Grassland	/	0	0	China	33.92	102.735	33°55.2′	102°44.1′	3432	0.9	657.8	Temperate	41	Deep drainage	Peatland (fen)	minerotrophic	overall	permanently	Carex Muliensis, Potamogeton pusillus	Cyperaceae	Peat soil	/	0-10	7.6	g kg-1	0-10	206.37	g kg-1	0-10	13.7		0-10	15.0635	2014/5-10	Growing season	May to September	/	biweekly	Field, Chamber	g kg-1	0-10	206.37	34.79	4	0.168581	148.26
3	Zhou et al. 2015	Drainage	Grassland	/	0	0	China	33.918	102.815	33°55.1′	102°48.9′	3438	0.9	658.8	Temperate	20	/	Peatland (fen)	minerotrophic	overall	seasonally	Koeleria tibetica, Carex Muliensis	Cyperaceae	Peat soil	/	0-10	7.5	g kg-1	0-10	160.87	g kg-1	0-10	18.07		0-10	8.9026	2013/6-10	Growing season	May to September	/	biweekly	Field, Chamber	g kg-1	0-10	160.87	69.68	4	0.433145	28.9
3	Zhou et al. 2015	Drainage	Grassland	/	0	0	China	33.918	102.815	33°55.1′	102°48.9′	3438	0.9	659.8	Temperate	21	Shallow drainage	Peatland (fen)	minerotrophic	overall	seasonally	Koeleria tibetica, Carex Muliensis	Cyperaceae	Peat soil	/	0-10	7.5	g kg-1	0-10	160.87	g kg-1	0-10	18.07		0-10	8.9026	2014/5-10	Growing season	May to September	/	biweekly	Field, Chamber	g kg-1	0-10	160.87	69.68	4	0.433145	28.9
5	Sun et al. 2009	Drainage	Forestry	/	0	0	China	48.065	128.51	48°03′53″	128°30′36″	260-500	0.4	630	Temperate	10	Shallow drainage	Marsh	minerotrophic	overall	seasonally	Carex Muliensis	Cyperaceae	Dark brown soil	/		/			/			/			/	2007/06-10	Growing season	June to October	/	11-day interval	Field, Chamber			/	/	/		/
5	Sun et al. 2009	Drainage	Forestry	/	0	0	China	48.065	128.51	48°03′53″	128°30′36″	260-500	0.4	630	Temperate	20	Deep drainage	Marsh	minerotrophic	overall	seasonally	Carex Muliensis	Cyperaceae	Dark brown soil	/		/			/			/			/	2007/06-10	Growing season	June to October	/	11-day interval	Field, Chamber			/	/	/		/
5	Sun et al. 2009	Drainage	Forestry	/	0	0	China	48.065	128.51	48°03′53″	128°30′36″	260-500	0.4	630	Temperate	10	Shallow drainage	Marsh	minerotrophic	overall	seasonally	Betula ovalifolia	Shrub	Dark brown soil	/		/			/			/			/	2007/06-10	Growing season	June to October	/	11-day interval	Field, Chamber			/	/	/		/
5	Sun et al. 2009	Drainage	Forestry	/	0	0	China	48.065	128.51	48°03′53″	128°30′36″	260-500	0.4	630	Temperate	20	Shallow drainage	Marsh	minerotrophic	overall	seasonally	Betula ovalifolia	Shrub	Dark brown soil	/		/			/			/			/	2007/06-10	Growing season	June to October	/	11-day interval	Field, Chamber			/	/	/		/
5	Sun et al. 2009	Drainage	Forestry	/	0	0	China	48.065	128.51	48°03′53″	128°30′36″	260-500	0.4	630	Temperate	10	Deep drainage	Marsh	minerotrophic	hummock	seasonally	Carex Muliensis	Cyperaceae	Dark brown soil	/		/			/			/			/	2007/06-10	Growing season	June to October	/	11-day interval	Field, Chamber			/	/	/		/
5	Sun et al. 2009	Drainage	Forestry	/	0	0	China	48.065	128.51	48°03′53″	128°30′36″	260-500	0.4	630	Temperate	10	Shallow drainage	Marsh	minerotrophic	hollow	seasonally	Carex Muliensis	Cyperaceae	Dark brown soil	/		/			/			/			/	2007/06-10	Growing season	June to October	/	11-day interval	Field, Chamber			/	/	/		/
5	Sun et al. 2009	Drainage	Forestry	/	0	0	China	48.065	128.51	48°03′53″	128°30′36″	260-500	0.4	630	Temperate	20	Deep drainage	Marsh	minerotrophic	hummock	seasonally	Carex Muliensis	Cyperaceae	Dark brown soil	/		/			/			/			/	2007/06-10	Growing season	June to October	/	11-day interval	Field, Chamber			/	/	/		/
5	Sun et al. 2009	Drainage	Forestry	/	0	0	China	48.065	128.51	48°03′53″	128°30′36″	260-500	0.4	630	Temperate	20	Shallow drainage	Marsh	minerotrophic	hollow	seasonally	Carex Muliensis	Cyperaceae	Dark brown soil	/		/			/			/			/	2007/06-10	Growing season	June to October	/	11-day interval	Field, Chamber			/	/	/		/
5	Sun et al. 2009	Drainage	Forestry	/	0	0	China	48.065	128.51	48°03′53″	128°30′36″	260-500	0.4	630	Temperate	10	Shallow drainage	Marsh	minerotrophic	hummock	seasonally	Betula ovalifolia	Shrub	Dark brown soil	/		/			/			/			/	2007/06-10	Growing season	June to October	/	11-day interval	Field, Chamber			/	/	/		/
5	Sun et al. 2009	Drainage	Forestry	/	0	0	China	48.065	128.51	48°03′53″	128°30′36″	260-500	0.4	630	Temperate	10	Shallow drainage	Marsh	minerotrophic	hollow	seasonally	Betula ovalifolia	Shrub	Dark brown soil	/		/			/			/			/	2007/06-10	Growing season	June to October	/	11-day interval	Field, Chamber			/	/	/		/
5	Sun et al. 2009	Drainage	Forestry	/	0	0	China	48.065	128.51	48°03′53″	128°30′36″	260-500	0.4	630	Temperate	20	Shallow drainage	Marsh	minerotrophic	hummock	seasonally	Betula ovalifolia	Shrub	Dark brown soil	/		/			/			/			/	2007/06-10	Growing season	June to October	/	11-day interval	Field, Chamber			/	/	/		/
5	Sun et al. 2009	Drainage	Forestry	/	0	0	China	48.065	128.51	48°03′53″	128°30′36″	260-500	0.4	630	Temperate	20	Shallow drainage	Marsh	minerotrophic	hollow	seasonally	Betula ovalifolia	Shrub	Dark brown soil	/		/			/			/			/	2007/06-10	Growing season	June to October	/	11-day interval	Field, Chamber			/	/	/		/
6	Olefeldt et al. 2017	Drainage	Water table manipulation	1	0	0	USA	64.82	-147.87	64.82°	147.87° W	/	-3.1	287	Boreal	/	/	Peatland (fen)	minerotrophic	overall	seasonally	Potentilla palustris, Carex atherodes, Equisetum fluviatile	Cyperaceae	Peat soil	/	0-10	5.3			/			/			/	June-August of 2005-2013	Growing season	May to September	wet	weekly to bioweekly	Field, Chamber			/	/	/		/
6	Olefeldt et al. 2017	Drainage	Water table manipulation	1	0	0	USA	64.82	-147.87	64.82°	147.87° W	/	-3.1	287	Boreal	/	/	Peatland (fen)	minerotrophic	overall	seasonally	Potentilla palustris, Carex atherodes, Equisetum fluviatile	Cyperaceae	Peat soil	/	0-10	5.3			/			/			/	June-August of 2005-2013	Growing season	May to September	dry	weekly to bioweekly	Field, Chamber			/	/	/		/
7	Strack and Zuback, 2013	Drainage	Peat extraction	/	0	0	Canada	47.967	-69.429	47.9671°	69.4285° W	/	5.2	886	Temperate	38	Deep drainage	Peatland (bog)	ombrotrophic	overall	seasonally	Mosses	Peat moss	Peat soil	/		/			/			/			/	2010/05-2011/03	Annual		/	5 times per month	Field, Chamber			/	/	/		/
8	Kandel et al. 2018	Drainage	Grassland	4	0	0	Denmark	57.23	9.84	57.23°	9.84°	/	9.3	925	Temperate	94	Shallow drainage	Peatland (bog)	/	overall	seasonally	Eriophorum vaginatum, Empetrum nigrum	Cyperaceae	Peat soil	/	0-25	3.4	g kg-1	0-25	410	g kg-1	0-25	13		0-25	31.5385	2014/06/10-2015/06/09	Annual		/	weekly to bioweekly	Field, Chamber	g kg-1	0-25	410	20	2	0.0487805	390
9	Dhandapani et al. 2019	Drainage	Forestry	2	0	0	Malaysia	3.694	101.185	3°41′39.5″	101°11′05.4″	/	/	/	Tropical	27	/	Swamp	/	overall	permanently	Antisoptera sp. Shorea sp.	Forest	Peat soil	/	0-10	3.1	g kg-1	0-10	498.6	g kg-1	0-10	25		0-10	19.944	2016/12-2017/10	Annual		/	monthly	Field, Chamber	g kg-1	0-10	498.6	3.6	3	0.00722022	502.3
11	Munir et al. 2015	Drainage	Water table manipulation	4.5	0	0	Canada	55.35	-112.517	55°21′	112°31′ W	/	2.1	504	Boreal	1	Deep drainage	Peatland (bog)	ombrotrophic	hummock	seasonally	Rhododendron groenlandicum	Shrub	Peat soil	/	0-10	4.1			/			/			/	2011/05/01-10/31	Growing season	May to October	wet	biweekly	Field, Chamber			/	/	/		/
11	Munir et al. 2015	Drainage	Water table manipulation	4.5	0	0	Canada	55.35	-112.517	55°21′	112°31′ W	/	2.1	504	Boreal	11	Deep drainage	Peatland (bog)	ombrotrophic	hummock	seasonally	Rhododendron groenlandicum	Shrub	Peat soil	/	0-10	4.1			/			/			/	2011/05/01-10/31	Growing season	May to October	wet	biweekly	Field, Chamber			/	/	/		/
11	Munir et al. 2015	Drainage	Water table manipulation	4.5	0	0	Canada	55.35	-112.517	55°21′	112°31′ W	/	2.1	504	Boreal	2	Deep drainage	Peatland (bog)	ombrotrophic	hummock	seasonally	Rhododendron groenlandicum	Shrub	Peat soil	/	0-10	4.1			/			/			/	2012/05/01-10/31	Growing season	May to October	dry	biweekly	Field, Chamber			/	/	/		/
11	Munir et al. 2015	Drainage	Water table manipulation	4.5	0	0	Canada	55.35	-112.517	55°21′	112°31′ W	/	2.1	504	Boreal	12	Deep drainage	Peatland (bog)	ombrotrophic	hummock	seasonally	Rhododendron groenlandicum	Shrub	Peat soil	/	0-10	4.1			/			/			/	2012/05/01-10/31	Growing season	May to October	dry	biweekly	Field, Chamber			/	/	/		/
11	Munir et al. 2015	Drainage	Water table manipulation	4.5	0	0	Canada	55.35	-112.517	55°21′	112°31′ W	/	2.1	504	Boreal	3	Deep drainage	Peatland (bog)	ombrotrophic	hummock	seasonally	Rhododendron groenlandicum	Shrub	Peat soil	/	0-10	4.1			/			/			/	2013/05/01-10/31	Growing season	May to October	dry	biweekly	Field, Chamber			/	/	/		/
11	Munir et al. 2015	Drainage	Water table manipulation	4.5	0	0	Canada	55.35	-112.517	55°21′	112°31′ W	/	2.1	504	Boreal	13	Deep drainage	Peatland (bog)	ombrotrophic	hummock	seasonally	Rhododendron groenlandicum	Shrub	Peat soil	/	0-10	4.1			/			/			/	2013/05/01-10/31	Growing season	May to October	dry	biweekly	Field, Chamber			/	/	/		/
11	Munir et al. 2015	Drainage	Water table manipulation	4.5	0	0	Canada	55.35	-112.517	55°21′	112°31′ W	/	2.1	504	Boreal	1	Deep drainage	Peatland (bog)	ombrotrophic	hollow	seasonally	Sphagnum mosses and lichens	Peat moss	Peat soil	/	0-10	4.1			/			/			/	2011/05/01-10/31	Growing season	May to October	wet	biweekly	Field, Chamber			/	/	/		/
11	Munir et al. 2015	Drainage	Water table manipulation	4.5	0	0	Canada	55.35	-112.517	55°21′	112°31′ W	/	2.1	504	Boreal	11	Deep drainage	Peatland (bog)	ombrotrophic	hollow	seasonally	Sphagnum mosses and lichens	Peat moss	Peat soil	/	0-10	4.1			/			/			/	2011/05/01-10/31	Growing season	May to October	wet	biweekly	Field, Chamber			/	/	/		/
11	Munir et al. 2015	Drainage	Water table manipulation	4.5	0	0	Canada	55.35	-112.517	55°21′	112°31′ W	/	2.1	504	Boreal	2	Deep drainage	Peatland (bog)	ombrotrophic	hollow	seasonally	Sphagnum mosses and lichens	Peat moss	Peat soil	/	0-10	4.1			/			/			/	2012/05/01-10/31	Growing season	May to October	dry	biweekly	Field, Chamber			/	/	/		/
11	Munir et al. 2015	Drainage	Water table manipulation	4.5	0	0	Canada	55.35	-112.517	55°21′	112°31′ W	/	2.1	504	Boreal	12	Deep drainage	Peatland (bog)	ombrotrophic	hollow	seasonally	Sphagnum mosses and lichens	Peat moss	Peat soil	/	0-10	4.1			/			/			/	2012/05/01-10/31	Growing season	May to October	dry	biweekly	Field, Chamber			/	/	/		/
11	Munir et al. 2015	Drainage	Water table manipulation	4.5	0	0	Canada	55.35	-112.517	55°21′	112°31′ W	/	2.1	504	Boreal	3	Deep drainage	Peatland (bog)	ombrotrophic	hollow	seasonally	Sphagnum mosses and lichens	Peat moss	Peat soil	/	0-10	4.1			/			/			/	2013/05/01-10/31	Growing season	May to October	dry	biweekly	Field, Chamber			/	/	/		/
11	Munir et al. 2015	Drainage	Water table manipulation	4.5	0	0	Canada	55.35	-112.517	55°21′	112°31′ W	/	2.1	504	Boreal	13	Deep drainage	Peatland (bog)	ombrotrophic	hollow	seasonally	Sphagnum mosses and lichens	Peat moss	Peat soil	/	0-10	4.1			/			/			/	2013/05/01-10/31	Growing season	May to October	dry	biweekly	Field, Chamber			/	/	/		/
11	Munir et al. 2015	Drainage	Water table manipulation	4.5	0	0	Canada	55.35	-112.517	55°21′	112°31′ W	/	2.1	504	Boreal	1	Deep drainage	Peatland (bog)	ombrotrophic	overall	seasonally	Rhododendron groenlandicum, Sphagnum mosses and lichens	Shrub	Peat soil	/	0-10	4.1			/			/			/	2011/05/01-10/31	Growing season	May to October	wet	biweekly	Field, Chamber			/	/	/		/
11	Munir et al. 2015	Drainage	Water table manipulation	4.5	0	0	Canada	55.35	-112.517	55°21′	112°31′ W	/	2.1	504	Boreal	11	Deep drainage	Peatland (bog)	ombrotrophic	overall	seasonally	Rhododendron groenlandicum, Sphagnum mosses and lichens	Shrub	Peat soil	/	0-10	4.1			/			/			/	2011/05/01-10/31	Growing season	May to October	wet	biweekly	Field, Chamber			/	/	/		/
11	Munir et al. 2015	Drainage	Water table manipulation	4.5	0	0	Canada	55.35	-112.517	55°21′	112°31′ W	/	2.1	504	Boreal	2	Deep drainage	Peatland (bog)	ombrotrophic	overall	seasonally	Rhododendron groenlandicum, Sphagnum mosses and lichens	Shrub	Peat soil	/	0-10	4.1			/			/			/	2012/05/01-10/31	Growing season	May to October	dry	biweekly	Field, Chamber			/	/	/		/
11	Munir et al. 2015	Drainage	Water table manipulation	4.5	0	0	Canada	55.35	-112.517	55°21′	112°31′ W	/	2.1	504	Boreal	12	Deep drainage	Peatland (bog)	ombrotrophic	overall	seasonally	Rhododendron groenlandicum, Sphagnum mosses and lichens	Shrub	Peat soil	/	0-10	4.1			/			/			/	2012/05/01-10/31	Growing season	May to October	dry	biweekly	Field, Chamber			/	/	/		/
11	Munir et al. 2015	Drainage	Water table manipulation	4.5	0	0	Canada	55.35	-112.517	55°21′	112°31′ W	/	2.1	504	Boreal	3	Deep drainage	Peatland (bog)	ombrotrophic	overall	seasonally	Rhododendron groenlandicum, Sphagnum mosses and lichens	Shrub	Peat soil	/	0-10	4.1			/			/			/	2013/05/01-10/31	Growing season	May to October	dry	biweekly	Field, Chamber			/	/	/		/
11	Munir et al. 2015	Drainage	Water table manipulation	4.5	0	0	Canada	55.35	-112.517	55°21′	112°31′ W	/	2.1	504	Boreal	13	Deep drainage	Peatland (bog)	ombrotrophic	overall	seasonally	Rhododendron groenlandicum, Sphagnum mosses and lichens	Shrub	Peat soil	/	0-10	4.1			/			/			/	2013/05/01-10/31	Growing season	May to October	dry	biweekly	Field, Chamber			/	/	/		/
12	Munir et al. 2014a	Drainage	Water table manipulation	4.5	0	0	Canada	55.35	-112.517	55°21′	112°31′ W	/	2.1	504	Boreal	1	Deep drainage	Peatland (bog)	ombrotrophic	hummock	seasonally	Rhododendron groenlandicum	Shrub	Peat soil	/	0-10	4.1			/			/			/	2011/05/01-10/31	Growing season	May to October	wet	biweekly	Field, Chamber			/	/	/		/
12	Munir et al. 2014a	Drainage	Water table manipulation	4.5	0	0	Canada	55.35	-112.517	55°21′	112°31′ W	/	2.1	504	Boreal	11	Deep drainage	Peatland (bog)	ombrotrophic	hummock	seasonally	Rhododendron groenlandicum	Shrub	Peat soil	/	0-10	4.1			/			/			/	2011/05/01-10/31	Growing season	May to October	wet	biweekly	Field, Chamber			/	/	/		/
12	Munir et al. 2014a	Drainage	Water table manipulation	4.5	0	0	Canada	55.35	-112.517	55°21′	112°31′ W	/	2.1	504	Boreal	2	Deep drainage	Peatland (bog)	ombrotrophic	hummock	seasonally	Rhododendron groenlandicum	Shrub	Peat soil	/	0-10	4.1			/			/			/	2012/05/01-10/31	Growing season	May to October	dry	biweekly	Field, Chamber			/	/	/		/
12	Munir et al. 2014a	Drainage	Water table manipulation	4.5	0	0	Canada	55.35	-112.517	55°21′	112°31′ W	/	2.1	504	Boreal	12	Deep drainage	Peatland (bog)	ombrotrophic	hummock	seasonally	Rhododendron groenlandicum	Shrub	Peat soil	/	0-10	4.1			/			/			/	2012/05/01-10/31	Growing season	May to October	dry	biweekly	Field, Chamber			/	/	/		/
12	Munir et al. 2014a	Drainage	Water table manipulation	4.5	0	0	Canada	55.35	-112.517	55°21′	112°31′ W	/	2.1	504	Boreal	3	Deep drainage	Peatland (bog)	ombrotrophic	hummock	seasonally	Rhododendron groenlandicum	Shrub	Peat soil	/	0-10	4.1			/			/			/	2013/05/01-10/31	Growing season	May to October	dry	biweekly	Field, Chamber			/	/	/		/
12	Munir et al. 2014a	Drainage	Water table manipulation	4.5	0	0	Canada	55.35	-112.517	55°21′	112°31′ W	/	2.1	504	Boreal	13	Deep drainage	Peatland (bog)	ombrotrophic	hummock	seasonally	Rhododendron groenlandicum	Shrub	Peat soil	/	0-10	4.1			/			/			/	2013/05/01-10/31	Growing season	May to October	dry	biweekly	Field, Chamber			/	/	/		/
12	Munir et al. 2014a	Drainage	Water table manipulation	4.5	0	0	Canada	55.35	-112.517	55°21′	112°31′ W	/	2.1	504	Boreal	1	Deep drainage	Peatland (bog)	ombrotrophic	hollow	seasonally	Sphagnum mosses and lichens	Peat moss	Peat soil	/	0-10	4.1			/			/			/	2011/05/01-10/31	Growing season	May to October	wet	biweekly	Field, Chamber			/	/	/		/
12	Munir et al. 2014a	Drainage	Water table manipulation	4.5	0	0	Canada	55.35	-112.517	55°21′	112°31′ W	/	2.1	504	Boreal	11	Deep drainage	Peatland (bog)	ombrotrophic	hollow	seasonally	Sphagnum mosses and lichens	Peat moss	Peat soil	/	0-10	4.1			/			/			/	2011/05/01-10/31	Growing season	May to October	wet	biweekly	Field, Chamber			/	/	/		/
12	Munir et al. 2014a	Drainage	Water table manipulation	4.5	0	0	Canada	55.35	-112.517	55°21′	112°31′ W	/	2.1	504	Boreal	2	Deep drainage	Peatland (bog)	ombrotrophic	hollow	seasonally	Sphagnum mosses and lichens	Peat moss	Peat soil	/	0-10	4.1			/			/			/	2012/05/01-10/31	Growing season	May to October	dry	biweekly	Field, Chamber			/	/	/		/
12	Munir et al. 2014a	Drainage	Water table manipulation	4.5	0	0	Canada	55.35	-112.517	55°21′	112°31′ W	/	2.1	504	Boreal	12	Deep drainage	Peatland (bog)	ombrotrophic	hollow	seasonally	Sphagnum mosses and lichens	Peat moss	Peat soil	/	0-10	4.1			/			/			/	2012/05/01-10/31	Growing season	May to October	dry	biweekly	Field, Chamber			/	/	/		/
12	Munir et al. 2014a	Drainage	Water table manipulation	4.5	0	0	Canada	55.35	-112.517	55°21′	112°31′ W	/	2.1	504	Boreal	3	Deep drainage	Peatland (bog)	ombrotrophic	hollow	seasonally	Sphagnum mosses and lichens	Peat moss	Peat soil	/	0-10	4.1			/			/			/	2013/05/01-10/31	Growing season	May to October	dry	biweekly	Field, Chamber			/	/	/		/
12	Munir et al. 2014a	Drainage	Water table manipulation	4.5	0	0	Canada	55.35	-112.517	55°21′	112°31′ W	/	2.1	504	Boreal	13	Deep drainage	Peatland (bog)	ombrotrophic	hollow	seasonally	Sphagnum mosses and lichens	Peat moss	Peat soil	/	0-10	4.1			/			/			/	2013/05/01-10/31	Growing season	May to October	dry	biweekly	Field, Chamber			/	/	/		/
12	Munir et al. 2014a	Drainage	Water table manipulation	4.5	0	0	Canada	55.35	-112.517	55°21′	112°31′ W	/	2.1	504	Boreal	1	Deep drainage	Peatland (bog)	ombrotrophic	overall	seasonally	Rhododendron groenlandicum, Sphagnum mosses and lichens	Shrub	Peat soil	/	0-10	4.1			/			/			/	2011/05/01-10/31	Growing season	May to October	wet	biweekly	Field, Chamber			/	/	/		/
12	Munir et al. 2014a	Drainage	Water table manipulation	4.5	0	0	Canada	55.35	-112.517	55°21′	112°31′ W	/	2.1	504	Boreal	11	Deep drainage	Peatland (bog)	ombrotrophic	overall	seasonally	Rhododendron groenlandicum, Sphagnum mosses and lichens	Shrub	Peat soil	/	0-10	4.1			/			/			/	2011/05/01-10/31	Growing season	May to October	wet	biweekly	Field, Chamber			/	/	/		/
12	Munir et al. 2014a	Drainage	Water table manipulation	4.5	0	0	Canada	55.35	-112.517	55°21′	112°31′ W	/	2.1	504	Boreal	2	Deep drainage	Peatland (bog)	ombrotrophic	overall	seasonally	Rhododendron groenlandicum, Sphagnum mosses and lichens	Shrub	Peat soil	/	0-10	4.1			/			/			/	2012/05/01-10/31	Growing season	May to October	dry	biweekly	Field, Chamber			/	/	/		/
12	Munir et al. 2014a	Drainage	Water table manipulation	4.5	0	0	Canada	55.35	-112.517	55°21′	112°31′ W	/	2.1	504	Boreal	12	Deep drainage	Peatland (bog)	ombrotrophic	overall	seasonally	Rhododendron groenlandicum, Sphagnum mosses and lichens	Shrub	Peat soil	/	0-10	4.1			/			/			/	2012/05/01-10/31	Growing season	May to October	dry	biweekly	Field, Chamber			/	/	/		/
12	Munir et al. 2014a	Drainage	Water table manipulation	4.5	0	0	Canada	55.35	-112.517	55°21′	112°31′ W	/	2.1	504	Boreal	3	Deep drainage	Peatland (bog)	ombrotrophic	overall	seasonally	Rhododendron groenlandicum, Sphagnum mosses and lichens	Shrub	Peat soil	/	0-10	4.1			/			/			/	2013/05/01-10/31	Growing season	May to October	dry	biweekly	Field, Chamber			/	/	/		/
12	Munir et al. 2014a	Drainage	Water table manipulation	4.5	0	0	Canada	55.35	-112.517	55°21′	112°31′ W	/	2.1	504	Boreal	13	Deep drainage	Peatland (bog)	ombrotrophic	overall	seasonally	Rhododendron groenlandicum, Sphagnum mosses and lichens	Shrub	Peat soil	/	0-10	4.1			/			/			/	2013/05/01-10/31	Growing season	May to October	dry	biweekly	Field, Chamber			/	/	/		/
13	Munir et al. 2014b	Drainage	Water table manipulation	4.5	0	0	Canada	55.35	-112.517	55°21′	112°31′ W	/	2.1	504	Boreal	11	Deep drainage	Peatland (bog)	ombrotrophic	hummock	seasonally	Rhododendron groenlandicum	Shrub	Peat soil	/	0-10	4.1			/			/			/	2011/05/01-10/31	Growing season	May to October	wet	biweekly	Field, Chamber			/	/	/		/
13	Munir et al. 2014b	Drainage	Water table manipulation	4.5	0	0	Canada	55.35	-112.517	55°21′	112°31′ W	/	2.1	504	Boreal	12	Deep drainage	Peatland (bog)	ombrotrophic	hummock	seasonally	Rhododendron groenlandicum	Shrub	Peat soil	/	0-10	4.1			/			/			/	2012/05/01-10/31	Growing season	May to October	dry	biweekly	Field, Chamber			/	/	/		/
13	Munir et al. 2014b	Drainage	Water table manipulation	4.5	0	0	Canada	55.35	-112.517	55°21′	112°31′ W	/	2.1	504	Boreal	11	Deep drainage	Peatland (bog)	ombrotrophic	hollow	seasonally	Sphagnum mosses and lichens	Peat moss	Peat soil	/	0-10	4.1			/			/			/	2011/05/01-10/31	Growing season	May to October	wet	biweekly	Field, Chamber			/	/	/		/
13	Munir et al. 2014b	Drainage	Water table manipulation	4.5	0	0	Canada	55.35	-112.517	55°21′	112°31′ W	/	2.1	504	Boreal	12	Deep drainage	Peatland (bog)	ombrotrophic	hollow	seasonally	Sphagnum mosses and lichens	Peat moss	Peat soil	/	0-10	4.1			/			/			/	2012/05/01-10/31	Growing season	May to October	dry	biweekly	Field, Chamber			/	/	/		/
13	Munir et al. 2014b	Drainage	Water table manipulation	4.5	0	0	Canada	55.35	-112.517	55°21′	112°31′ W	/	2.1	504	Boreal	11	Deep drainage	Peatland (bog)	ombrotrophic	overall	seasonally	Rhododendron groenlandicum, Sphagnum mosses and lichens	Shrub	Peat soil	/	0-10	4.1			/			/			/	2011/05/01-10/31	Growing season	May to October	wet	biweekly	Field, Chamber			/	/	/		/
13	Munir et al. 2014b	Drainage	Water table manipulation	4.5	0	0	Canada	55.35	-112.517	55°21′	112°31′ W	/	2.1	504	Boreal	12	Deep drainage	Peatland (bog)	ombrotrophic	overall	seasonally	Rhododendron groenlandicum, Sphagnum mosses and lichens	Shrub	Peat soil	/	0-10	4.1			/			/			/	2012/05/01-10/31	Growing season	May to October	dry	biweekly	Field, Chamber			/	/	/		/
14	Karu et al. 2014	Drainage	Peat extraction	0.9	0	0	Estonia	59.207	27.264	59°12.41′	27°15.83′	/	/	/	Boreal	59	Shallow drainage	Peatland (bog)	ombrotrophic	overall	seasonally	Mosses	Peat moss	Peat soil	/	0-15	2.55	g kg-1	0-15	466.9	g kg-1	0.15	8.8		0-15	53.0568	2009/04-12	Growing season	April to December	/	monthly	Field, Chamber	g kg-1	0-15	466.9	9.36496	3	0.0200577	453.1
14	Karu et al. 2014	Drainage	Peat extraction	0.9	0	0	Estonia	59.177	27.199	59°10.60′	27°11.93′	/	/	/	Boreal	/	Shallow drainage	Peatland (bog)	ombrotrophic	overall	seasonally	Mosses	Peat moss	Peat soil	/	0-15	2.55	g kg-1	0-15	466.9	g kg-1	0.15	8.8		0-15	53.0568	2009/04-12	Growing season	April to December	/	monthly	Field, Chamber	g kg-1	0-15	466.9	9.36496	3	0.0200577	462.15
15	Happell and Chanton, 1993	Drainage	Water table manipulation	/	0	0	USA	30.117	-84.25	30°07′00″	84°15′00″W	/	/	/	Subtropical	0.6	/	Swamp	/	overall	seasonally	Acer rubrum	Forest	Peat soil	/		/			/			/			/	1990/05-1991/05	Annual		/	monthly	Field, Chamber			/	/	/		/
16	Lupikis et al. 2017	Drainage	Agriculture	0.8	0	0	Lativia	56.864	23.925	56.864°	23.925°	/	/	/	Temperate	34	/	Swamp	/	overall	seasonally	Dryopterioso-caricosa	Forest	Peat soil	/		/	g kg-1	0-10	521.3			/			/	2016	/		/	/	/	g kg-1	0-10	521.3	44.5853	4		365.2
17	Yrjälä et al. 2017	Low drainage	Forestry	/	0	0	Finland	70.767	25.85	66°286′	25°51′	/	/	/	Boreal	42	Shallow drainage	Peatland (fen)	mesotrophic	overall	seasonally	Sphagnum mosses and lichens	Peat moss	Peat soil	/		/			/			/			/	2002-2004	Annual		/	/	Field, Chamber			/	/	/		/
17	Yrjälä et al. 2017	Medium drainage	Forestry	/	0	0	Finland	70.767	25.85	66°286′	25°51′	/	/	/	Boreal	42	Shallow drainage	Peatland (fen)	mesotrophic	overall	seasonally	Sphagnum mosses and lichens	Peat moss	Peat soil	/		/			/			/			/	2002-2004	Annual		/	/	Field, Chamber			/	/	/		/
17	Yrjälä et al. 2017	High drainage	Forestry	/	0	0	Finland	70.767	25.85	66°286′	25°51′	/	/	/	Boreal	42	Shallow drainage	Peatland (fen)	mesotrophic	overall	seasonally	Sphagnum mosses and lichens	Peat moss	Peat soil	/		/			/			/			/	2002-2004	Annual		/	/	Field, Chamber			/	/	/		/
18	Martikainen et al. 1995	Drainage	Forestry	/	0	0	Finland	61.783	24.317	61°47′	24°19′	/	/	/	Boreal	30	Shallow drainage	Peatland (fen)	minerotrophic	overall	seasonally	Sphagnum angustifolium, Sphagnum allax, Sphagnum papillosum	Peat moss	Peat soil	/		/			/			/			/	1991/04-11	Annual		wet	1-4 times monthly	Field, Chamber			/	/	/		/
18	Martikainen et al. 1995	Drainage	Forestry	/	0	0	Finland	61.783	24.317	61°47′	24°19′	/	/	/	Boreal	31	Deep drainage	Peatland (fen)	minerotrophic	overall	seasonally	Sphagnum angustifolium, Sphagnum allax, Sphagnum papillosum	Peat moss	Peat soil	/		/			/			/			/	1992/04-11	Annual		dry	1-4 times monthly	Field, Chamber			/	/	/		/
18	Martikainen et al. 1995	Drainage	Forestry	/	0	0	Finland	61.783	24.317	61°47′	24°19′	/	/	/	Boreal	30	Shallow drainage	Peatland (bog)	ombrotrophic	overall	seasonally	Sphagnum angustifolium, Sphagnum fuscum	Peat moss	Peat soil	/		/			/			/			/	1991/04-11	Annual		wet	1-4 times monthly	Field, Chamber			/	/	/		/
18	Martikainen et al. 1995	Drainage	Forestry	/	0	0	Finland	61.783	24.317	61°47′	24°19′	/	/	/	Boreal	31	Shallow drainage	Peatland (bog)	ombrotrophic	overall	seasonally	Sphagnum angustifolium, Sphagnum fuscum	Peat moss	Peat soil	/		/			/			/			/	1992/04-11	Annual		dry	1-4 times monthly	Field, Chamber			/	/	/		/
20	Hirano et al. 2009	Drainage	Forestry	2.5	0	0	Indonesia	-2.55	113.833	2°33′S	113°50′	/	26.3	2331	Tropical	21	/	Swamp	/	hollow	seasonally	Forest	Forest	Dark brown soil	/		/			/			/			/	2004	Annual		/	CO2 daily, CH4 once per week	Field, Chamber			/	/	/		/
20	Hirano et al. 2009	Drainage	Forestry	2.5	0	0	Indonesia	-2.55	113.833	2°33′S	113°50′	/	26.3	2331	Tropical	22	/	Swamp	/	hollow	seasonally	Forest	Forest	Dark brown soil	/		/			/			/			/	2005	Annual		/	CO2 daily, CH4 once per week	Field, Chamber			/	/	/		/
21	Palmer et al. 2016	Drainage	Water table manipulation	/	0	0	Germany	50.131	11.881	50°07′53″	11°52′51″	/	6.9	957	Temperate	0.167	Deep drainage	Peatland (fen)	minerotrophic	overall	seasonally	/	/	Peat soil	/	0-20	5.2			/			/			/	2008/05-11	Growing season	May to November	/	2-4 times per month	Field, Chamber			/	/	/		/
22	Martikainen et al. 1993	Drainage	Forestry	/	0	0	Finland	61.783	24.3	61°47′	24°18′	/	/	/	Boreal	50	Shallow drainage	Peatland (fen)	mesotrophic	overall	seasonally	Sphagnum papillosum, Sphagnum angustifolium	Peat moss	Peat soil	/	0-10	5			/			/			/	1992	Annual		/	weekly	Field, Chamber			/	/	/		/
22	Martikainen et al. 1993	Drainage	Forestry	/	0	0	Finland	61.783	24.3	61°47′	24°18′	/	/	/	Boreal	45	Shallow drainage	Peatland (fen)	minerotrophic	overall	seasonally	Carex rostrata	Cyperaceae	Peat soil	/	0-10	5			/	g kg-1	0-10	19			/	1991	Annual		/	weekly	Field, Chamber			/	/	/		/
22	Martikainen et al. 1993	Drainage	Forestry	/	0	0	Finland	61.783	24.3	61°47′	24°18′	/	/	/	Boreal	46	Deep drainage	Peatland (fen)	minerotrophic	overall	seasonally	Carex rostrata	Cyperaceae	Peat soil	/	0-10	5			/	g kg-1	0-10	19			/	1992	Annual		/	weekly	Field, Chamber			/	/	/		/
22	Martikainen et al. 1993	Drainage	Forestry	/	0	0	Finland	61.783	24.3	61°47′	24°18′	/	/	/	Boreal	42	Shallow drainage	Peatland (bog)	ombrotrophic	hummock	seasonally	Sphagnum angustifolium, Sphagnum fuscum	Peat moss	Peat soil	/	0-10	4.3			/	g kg-1	0-10	5			/	1991	Annual		/	weekly	Field, Chamber			/	/	/		/
22	Martikainen et al. 1993	Drainage	Forestry	/	0	0	Finland	61.783	24.3	61°47′	24°18′	/	/	/	Boreal	43	Shallow drainage	Peatland (bog)	ombrotrophic	hummock	seasonally	Sphagnum angustifolium, Sphagnum fuscum	Peat moss	Peat soil	/	0-10	4.3			/	g kg-1	0-10	5			/	1992	Annual		/	weekly	Field, Chamber			/	/	/		/
22	Martikainen et al. 1993	Drainage	Forestry	/	0	0	Finland	61.783	24.3	61°47′	24°18′	/	/	/	Boreal	43	Shallow drainage	Peatland (bog)	ombrotrophic	overall	seasonally	Sphagnum angustifolium, Sphagnum fuscum	Peat moss	Peat soil	/	0-10	4.2			/	g kg-1	0-10	4			/	1991	Annual		/	weekly	Field, Chamber			/	/	/		/
22	Martikainen et al. 1993	Drainage	Forestry	/	0	0	Finland	61.783	24.3	61°47′	24°18′	/	/	/	Boreal	44	Shallow drainage	Peatland (bog)	ombrotrophic	overall	seasonally	Sphagnum angustifolium, Sphagnum fuscum	Peat moss	Peat soil	/	0-10	4.2			/	g kg-1	0-10	4			/	1992	Annual		/	weekly	Field, Chamber			/	/	/		/
23	Furukawa et al. 2005	Drainage	Forestry	/	0	0	Indonesia	-1.226	103.619	1°13′35″S	103°37′10″	/	26.3	2500	Tropical	20	Shallow drainage	Swamp	minerotrophic	overall	seasonally	Forest	Forest	Peat soil	/	0-10	3.58667	g kg-1	0-10	340	g kg-1	0-10	13.6		0-10	25	2001/11	Wet season	November 2001 to January 2002	/	monthly	Field, Chamber	g kg-1	0-10	340	3.4641	3	0.0101885	325
24	Adji et al. 2014	Drainage	Forestry	4	0	0	Indonesia	-2.207	105	02°12′26″S	105°0′0″	/	26.2	2540	Tropical	21	Deep drainage	Swamp	minerotrophic	overall	seasonally	Tristania whittiana, Combretocarpus rotundatus, Palaquium leiocarpum, Stemonurus scorpioides	Forest	Typic Tropofibrists	/	0-10	3.6			/			/			/	2011/12-2012/05	Wet season	December 2011 to May 2012	wet	monthly	Field, Chamber			/	/	/		/
25	Strack et al. 2004	Drainage	Forestry	1.2	0	0	Canada	46.667	-71.167	46°40′	71°10′W	/	/	/	Temperate	8	Shallow drainage	Peatland (fen)	ombrotrophic	overall	seasonally	Sphagnum rubellum	Peat moss	Peat soil	/		/			/			/			/	2001/06-2002/03	Annual		/	weekly to monthly	Field, Chamber			/	/	/		/
25	Strack et al. 2004	Drainage	Forestry	1.2	0	0	Canada	46.667	-71.167	46°40′	71°10′W	/	/	/	Temperate	8	Shallow drainage	Peatland (fen)	ombrotrophic	hummock	seasonally	Sphagnum rubellum, Chamaedaphne calyculata, Carex oligosperma	Peat moss	Peat soil	/		/			/			/			/	2001/06-2002/03	Annual		/	weekly to monthly	Field, Chamber			/	/	/		/
25	Strack et al. 2004	Drainage	Forestry	1.2	0	0	Canada	46.667	-71.167	46°40′	71°10′W	/	/	/	Temperate	8	Shallow drainage	Peatland (fen)	ombrotrophic	lawn	seasonally	Sphagnum papillosum, Carex limosa	Peat moss	Peat soil	/		/			/			/			/	2001/06-2002/03	Annual		/	weekly to monthly	Field, Chamber			/	/	/		/
25	Strack et al. 2004	Drainage	Forestry	1.2	0	0	Canada	46.667	-71.167	46°40′	71°10′W	/	/	/	Temperate	8	Shallow drainage	Peatland (fen)	ombrotrophic	hollow	permanently	Sphagnum cuspidatum, Rhynchospora alba, Scirpus subterminalis	Peat moss	Peat soil	/		/			/			/			/	2001/06-2002/03	Annual		/	weekly to monthly	Field, Chamber			/	/	/		/
26	Laine et al. 1996	Drainage	Forestry	/	0	0	Finland	61.8	24.317	61°48′	24°19′	150	3	700	Boreal	30	Shallow drainage	Peatland (fen)	minerotrophic	overall	seasonally	/	/	Peat soil	/	0-20	5.6	g kg-1	0-20	496	g kg-1	0-20	19		0-20	26.1053	1991	Annual		/	weekly	Field, Chamber	g kg-1	0-20	496	8	3	0.016129	517
26	Laine et al. 1996	Drainage	Forestry	/	0	0	Finland	61.8	24.317	61°48′	24°19′	150	3	700	Boreal	31	Shallow drainage	Peatland (fen)	minerotrophic	overall	seasonally	/	/	Peat soil	/	0-20	5.6	g kg-1	0-20	496	g kg-1	0-20	19		0-20	26.1053	1992	Annual		/	weekly	Field, Chamber	g kg-1	0-20	496	8	3	0.016129	517
26	Laine et al. 1996	Drainage	Forestry	/	0	0	Finland	61.8	24.317	61°48′	24°19′	150	3	700	Boreal	30	Shallow drainage	Peatland (fen)	minerotrophic	overall	seasonally	/	/	Peat soil	/	0-20	4.4	g kg-1	0-20	481	g kg-1	0-20	14		0-20	34.3571	1991	Annual		/	weekly	Field, Chamber	g kg-1	0-20	481	11	3	0.022869	502
26	Laine et al. 1996	Drainage	Forestry	/	0	0	Finland	61.8	24.317	61°48′	24°19′	150	3	700	Boreal	31	Deep drainage	Peatland (fen)	minerotrophic	overall	seasonally	/	/	Peat soil	/	0-20	4.4	g kg-1	0-20	481	g kg-1	0-20	14		0-20	34.3571	1992	Annual		/	weekly	Field, Chamber	g kg-1	0-20	481	11	3	0.022869	502
26	Laine et al. 1996	Drainage	Forestry	/	0	0	Finland	61.8	24.317	61°48′	24°19′	150	3	700	Boreal	30	Shallow drainage	Peatland (bog)	ombrotrophic	overall	seasonally	/	/	Peat soil	/	0-20	3.8	g kg-1	0-20	473	g kg-1	0-20	9		0-20	52.5556	1991	Annual		/	weekly	Field, Chamber	g kg-1	0-20	473	16	3	0.0338266	473
26	Laine et al. 1996	Drainage	Forestry	/	0	0	Finland	61.8	24.317	61°48′	24°19′	150	3	700	Boreal	31	Shallow drainage	Peatland (bog)	ombrotrophic	overall	seasonally	/	/	Peat soil	/	0-20	3.8	g kg-1	0-20	473	g kg-1	0-20	9		0-20	52.5556	1992	Annual		/	weekly	Field, Chamber	g kg-1	0-20	473	16	3	0.0338266	473
26	Laine et al. 1996	Drainage	Forestry	/	0	0	Finland	61.8	24.317	61°48′	24°19′	150	3	700	Boreal	30	Shallow drainage	Peatland (bog)	ombrotrophic	hummock	seasonally	/	/	Peat soil	/	0-20	3.8	g kg-1	0-20	447	g kg-1	0-20	5		0-20	89.4	1991	Annual		/	weekly	Field, Chamber	g kg-1	0-20	447	8	3	0.0178971	454
26	Laine et al. 1996	Drainage	Forestry	/	0	0	Finland	61.8	24.317	61°48′	24°19′	150	3	700	Boreal	31	Shallow drainage	Peatland (bog)	ombrotrophic	hummock	seasonally	/	/	Peat soil	/	0-20	3.8	g kg-1	0-20	447	g kg-1	0-20	5		0-20	89.4	1992	Annual		/	weekly	Field, Chamber	g kg-1	0-20	447	8	3	0.0178971	454
28	Tangen et al. 2015	Drainage	Agriculture	/	0	0	USA	48.28	-98.87	48.28°	98.87° W	/	19	360	Temperate	5	Deep drainage	/	minerotrophic	overall	seasonally	/	/	Peat soil	/		/	g kg-1	0-15	97.1773	g kg-1	0-15	8.9078		0-15	10.9092	2005/6/1-10/31	Growing season	April to October	/	biweekly	Field, Chamber	g kg-1	0-15	97.1773	0.0144787	3	0.000148992	64.6617
28	Tangen et al. 2015	Drainage	Agriculture	/	0	0	USA	48.23	-98.53	48.23°	98.53° W	/	21	280	Temperate	6	Deep drainage	/	minerotrophic	overall	seasonally	/	/	Peat soil	/		/	g kg-1	0-15	97.1773	g kg-1	0-15	8.9078		0-15	10.9092	2006/4/5-9/27	Growing season	April to October	/	biweekly	Field, Chamber	g kg-1	0-15	97.1773	0.0144787	3	0.000148992	64.6617
28	Tangen et al. 2015	Drainage	Agriculture	/	0	0	USA	48.07	-98.51	48.07°	98.51° W	/	20	290	Temperate	7	Deep drainage	/	minerotrophic	overall	seasonally	/	/	Peat soil	/		/	g kg-1	0-15	97.1773	g kg-1	0-15	8.9078		0-15	10.9092	2007/4/11-9/14	Growing season	April to October	/	biweekly	Field, Chamber	g kg-1	0-15	97.1773	0.0144787	3	0.000148992	64.6617
28	Tangen et al. 2015	Drainage	Agriculture	/	0	0	USA	48.16	-98.44	48.16°	98.44° W	/	19	380	Temperate	8	Deep drainage	/	minerotrophic	overall	seasonally	/	/	Peat soil	/		/	g kg-1	0-15	97.1773	g kg-1	0-15	8.9078		0-15	10.9092	2008/4/2-8/22	Growing season	April to October	/	biweekly	Field, Chamber	g kg-1	0-15	97.1773	0.0144787	3	0.000148992	64.6617
28	Tangen et al. 2015	Drainage	Agriculture	/	0	0	USA	47.7	-99.15	47.70°	99.15° W	/	19	360	Temperate	3	Deep drainage	/	minerotrophic	overall	permanently	/	/	Peat soil	/		/	g kg-1	0-15	105.833	g kg-1	0-15	9.87302		0-15	10.7195	2005/6/1-10/31	Growing season	April to October	/	biweekly	Field, Chamber	g kg-1	0-15	105.833	0.0229973	3	0.000217298	93.6036
28	Tangen et al. 2015	Drainage	Agriculture	/	0	0	USA	47.49	-98.77	47.49°	98.77° W	/	21	280	Temperate	4	Deep drainage	/	minerotrophic	overall	permanently	/	/	Peat soil	/		/	g kg-1	0-15	105.833	g kg-1	0-15	9.87302		0-15	10.7195	2006/4/5-9/27	Growing season	April to October	/	biweekly	Field, Chamber	g kg-1	0-15	105.833	0.0229973	3	0.000217298	93.6036
28	Tangen et al. 2015	Drainage	Agriculture	/	0	0	USA	47.4	-98.41	47.40°	98.41° W	/	20	290	Temperate	5	Deep drainage	/	minerotrophic	overall	permanently	/	/	Peat soil	/		/	g kg-1	0-15	105.833	g kg-1	0-15	9.87302		0-15	10.7195	2007/4/11-9/14	Growing season	April to October	/	biweekly	Field, Chamber	g kg-1	0-15	105.833	0.0229973	3	0.000217298	93.6036
28	Tangen et al. 2015	Drainage	Agriculture	/	0	0	USA	47.35	-98.2	47.35°	98.20° W	/	19	380	Temperate	6	Deep drainage	/	minerotrophic	overall	permanently	/	/	Peat soil	/		/	g kg-1	0-15	105.833	g kg-1	0-15	9.87302		0-15	10.7195	2008/4/2-8/22	Growing season	April to October	/	biweekly	Field, Chamber	g kg-1	0-15	105.833	0.0229973	3	0.000217298	93.6036
28	Tangen et al. 2015	Drainage	Agriculture	/	0	0	USA	47.67	-96.31	47.67°	96.31° W	/	19	570	Temperate	5	Deep drainage	/	minerotrophic	overall	seasonally	/	/	Peat soil	/		/	g kg-1	0-15	108.854	g kg-1	0-15	7.42276		0-15	14.6648	2005/6/1-10/31	Growing season	April to October	/	biweekly	Field, Chamber	g kg-1	0-15	108.854	0.0172702	3	0.000158655	73.4536
28	Tangen et al. 2015	Drainage	Agriculture	/	0	0	USA	46.58	-96.15	46.58°	96.15° W	/	21	360	Temperate	6	Deep drainage	/	minerotrophic	overall	seasonally	/	/	Peat soil	/		/	g kg-1	0-15	108.854	g kg-1	0-15	7.42276		0-15	14.6648	2006/4/5-9/27	Growing season	April to October	/	biweekly	Field, Chamber	g kg-1	0-15	108.854	0.0172702	3	0.000158655	73.4536
28	Tangen et al. 2015	Drainage	Agriculture	/	0	0	USA	46.06	-96.22	46.06°	96.22° W	/	19	570	Temperate	3	Deep drainage	/	minerotrophic	overall	permanently	/	/	Peat soil	/		/	g kg-1	0-15	96.373	g kg-1	0-15	7.46032		0-15	12.9181	2005/6/1-10/31	Growing season	April to October	/	biweekly	Field, Chamber	g kg-1	0-15	96.373	0.0213263	3	0.000221289	74.2011
28	Tangen et al. 2015	Drainage	Agriculture	/	0	0	USA	45.93	-96	45.93°	96.00° W	/	21	360	Temperate	4	Deep drainage	/	minerotrophic	overall	permanently	/	/	Peat soil	/		/	g kg-1	0-15	96.373	g kg-1	0-15	7.46032		0-15	12.9181	2006/4/5-9/27	Growing season	April to October	/	biweekly	Field, Chamber	g kg-1	0-15	96.373	0.0213263	3	0.000221289	74.2011
28	Tangen et al. 2015	Drainage	Agriculture	/	0	0	USA	43.15	-95.17	43.15°	95.17° W	/	23	760	Temperate	5	Deep drainage	/	minerotrophic	overall	seasonally	/	/	Peat soil	/		/	g kg-1	0-15	91.9482	g kg-1	0-15	5.47573		0-15	16.792	2005/6/1-10/31	Growing season	April to October	/	biweekly	Field, Chamber	g kg-1	0-15	91.9482	0.0192527	3	0.000209386	73.897
28	Tangen et al. 2015	Drainage	Agriculture	/	0	0	USA	42.96	-94.88	42.96°	94.88° W	/	22	660	Temperate	6	Deep drainage	/	minerotrophic	overall	seasonally	/	/	Peat soil	/		/	g kg-1	0-15	91.9482	g kg-1	0-15	5.47573		0-15	16.792	2006/4/5-9/27	Growing season	April to October	/	biweekly	Field, Chamber	g kg-1	0-15	91.9482	0.0192527	3	0.000209386	73.897
28	Tangen et al. 2015	Drainage	Agriculture	/	0	0	USA	43.03	-94.4	43.03°	94.40° W	/	23	760	Temperate	3	Deep drainage	/	minerotrophic	overall	permanently	/	/	Peat soil	/		/	g kg-1	0-15	163.652	g kg-1	0-15	8.78261		0-15	18.6337	2005/6/1-10/31	Growing season	April to October	/	biweekly	Field, Chamber	g kg-1	0-15	163.652	0.0218441	3	0.000133479	95.0275
28	Tangen et al. 2015	Drainage	Agriculture	/	0	0	USA	43.15	-93.76	43.15°	93.76° W	/	22	660	Temperate	4	Deep drainage	/	minerotrophic	overall	permanently	/	/	Peat soil	/		/	g kg-1	0-15	163.652	g kg-1	0-15	8.78261		0-15	18.6337	2006/4/5-9/27	Growing season	April to October	/	biweekly	Field, Chamber	g kg-1	0-15	163.652	0.0218441	3	0.000133479	95.0275
29	Pearson et al. 2015	Drainage	Forestry	1.25	0	0	Finland	61.783	24.3	61°47′	24°18′	/	3.5	700	Boreal	0.0833333	Shallow drainage	Peatland (fen)	mesotrophic	overall	seasonally	Carex Sphagnul	Cyperaceae	Peat soil	/		/			/			/			/	06-08 in 2008-2010	Growing season	May to September	/	biweekly	Field, Chamber			/	/	/		/
29	Pearson et al. 2015	Drainage	Forestry	1.25	0	0	Finland	61.783	24.3	61°47′	24°18′	/	3.5	700	Boreal	47	Shallow drainage	Peatland (fen)	mesotrophic	overall	seasonally	Carex Sphagnul	Cyperaceae	Peat soil	/		/			/			/			/	06-08 in 2008-2010	Growing season	May to September	/	biweekly	Field, Chamber			/	/	/		/
29	Pearson et al. 2015	Drainage	Forestry	1.25	0	0	Finland	62.217	23.383	62°13′	23°23′	/	3.5	700	Boreal	0.0833333	Shallow drainage	Peatland (fen)	mesotrophic	overall	seasonally	Carex Sphagnul	Cyperaceae	Peat soil	/		/			/			/			/	06-08 in 2008-2010	Growing season	May to September	/	biweekly	Field, Chamber			/	/	/		/
29	Pearson et al. 2015	Drainage	Forestry	1.25	0	0	Finland	62.217	23.383	62°13′	23°23′	/	3.5	700	Boreal	29	Shallow drainage	Peatland (fen)	mesotrophic	overall	seasonally	Carex Sphagnul	Cyperaceae	Peat soil	/		/			/			/			/	06-08 in 2008-2010	Growing season	May to September	/	biweekly	Field, Chamber			/	/	/		/
29	Pearson et al. 2015	Drainage	Forestry	1.25	0	0	Finland	67.983	24.2	67°59′	24°12′	/	-1.4	511	Boreal	0.166667	Shallow drainage	Peatland (fen)	mesotrophic	overall	seasonally	Carex Sphagnul	Cyperaceae	Peat soil	/		/			/			/			/	06-08 in 2008-2010	Growing season	May to September	/	biweekly	Field, Chamber			/	/	/		/
29	Pearson et al. 2015	Drainage	Forestry	1.25	0	0	Finland	67.983	24.2	67°59′	24°12′	/	-1.4	511	Boreal	36	Shallow drainage	Peatland (fen)	mesotrophic	overall	seasonally	Carex Sphagnul	Cyperaceae	Peat soil	/		/			/			/			/	06-08 in 2008-2010	Growing season	May to September	/	biweekly	Field, Chamber			/	/	/		/
31	Danevcic et al. 2010	Drainage	Forestry	/	0	0	Slovenia	45.983	14.5	45°59′	14°30′	/	10	1400	Temperate	/	Deep drainage	Peatland (bog)	/	overall	seasonally	Forest	Forest	Peat soil	/	0-20	4.58	g kg-1	0-20	454	g kg-1	0-20	27.5		0-20	16.5091	2005/6-2006/8	Annual		wet	weekly	Field, Chamber	g kg-1	0-20	454	2.1	3	0.00462555	404
32	Von Arnold et al. 2005a	Drainage	Forestry	0.9	0	0	Sweden	57.133	14.75	57°08′	14°45′	/	5.6	766.96	Boreal	30	Shallow drainage	Peatland (bog)	/	overall	seasonally	Sedges	Cyperaceae	Peat soil	/	0-10	3.9	g kg-1	0-10	450	g kg-1	0-10	10		0-10	45	2000/9-2001/9	Annual		wet	weekly	Field, Chamber	g kg-1	0-10	450	8.66025	3	0.019245	490
32	Von Arnold et al. 2005a	Drainage	Forestry	0.9	0	0	Sweden	57.133	14.75	57°08′	14°45′	/	5.6	789.598	Boreal	31	Shallow drainage	Peatland (bog)	/	overall	seasonally	Sedges	Cyperaceae	Peat soil	/	0-10	3.9	g kg-1	0-10	450	g kg-1	0-10	10		0-10	45	2001/9-2002/9	Annual		wet	weekly	Field, Chamber	g kg-1	0-10	450	8.66025	3	0.019245	490
32	Von Arnold et al. 2005a	Drainage	Forestry	0.9	0	0	Sweden	57.133	14.75	57°08′	14°45′	/	5.6	766.96	Boreal	40	Shallow drainage	Peatland (bog)	/	overall	seasonally	Sedges	Cyperaceae	Peat soil	/	0-10	3.9	g kg-1	0-10	450	g kg-1	0-10	10		0-10	45	2000/9-2001/9	Annual		wet	weekly	Field, Chamber	g kg-1	0-10	450	8.66025	3	0.019245	480
32	Von Arnold et al. 2005a	Drainage	Forestry	0.9	0	0	Sweden	57.133	14.75	57°08′	14°45′	/	5.6	789.598	Boreal	41	Shallow drainage	Peatland (bog)	/	overall	seasonally	Sedges	Cyperaceae	Peat soil	/	0-10	3.9	g kg-1	0-10	450	g kg-1	0-10	10		0-10	45	2001/9-2002/9	Annual		wet	weekly	Field, Chamber	g kg-1	0-10	450	8.66025	3	0.019245	480
32	Von Arnold et al. 2005a	Drainage	Forestry	0.9	0	0	Sweden	57.133	14.75	57°08′	14°45′	/	5.6	766.96	Boreal	40	Shallow drainage	Peatland (bog)	/	overall	seasonally	Sedges	Cyperaceae	Peat soil	/	0-10	3.9	g kg-1	0-10	450	g kg-1	0-10	10		0-10	45	2000/9-2001/9	Annual		wet	weekly	Field, Chamber	g kg-1	0-10	450	8.66025	3	0.019245	510
32	Von Arnold et al. 2005a	Drainage	Forestry	0.9	0	0	Sweden	57.133	14.75	57°08′	14°45′	/	5.6	789.598	Boreal	41	Shallow drainage	Peatland (bog)	/	overall	seasonally	Sedges	Cyperaceae	Peat soil	/	0-10	3.9	g kg-1	0-10	450	g kg-1	0-10	10		0-10	45	2001/9-2002/9	Annual		wet	weekly	Field, Chamber	g kg-1	0-10	450	8.66025	3	0.019245	510
33	Von Arnold et al. 2005b	Drainage	Forestry	0.9	0	0	Sweden	57.133	14.75	57°08′	14°45′	/	5.6	766.96	Boreal	60	Shallow drainage	Peatland (bog)	/	overall	seasonally	Sedges	Cyperaceae	Peat soil	/	0-10	4.2	g kg-1	0-10	540	g kg-1	0-10	25		0-10	21.6	2000/9-2001/9	Annual		wet	weekly	Field, Chamber	g kg-1	0-10	540	28.2843	8	0.0523783	530
33	Von Arnold et al. 2005b	Drainage	Forestry	0.9	0	0	Sweden	57.133	14.75	57°08′	14°45′	/	5.6	789.598	Boreal	61	Shallow drainage	Peatland (bog)	/	overall	seasonally	Sedges	Cyperaceae	Peat soil	/	0-10	4.2	g kg-1	0-10	540	g kg-1	0-10	25		0-10	21.6	2001/9-2002/9	Annual		wet	weekly	Field, Chamber	g kg-1	0-10	540	28.2843	8	0.0523783	530
33	Von Arnold et al. 2005b	Drainage	Forestry	0.9	0	0	Sweden	57.133	14.75	57°08′	14°45′	/	5.6	766.96	Boreal	20	Shallow drainage	Peatland (bog)	/	overall	seasonally	Sedges	Cyperaceae	Peat soil	/	0-10	4.2	g kg-1	0-10	540	g kg-1	0-10	25		0-10	21.6	2000/9-2001/9	Annual		wet	weekly	Field, Chamber	g kg-1	0-10	540	28.2843	8	0.0523783	520
33	Von Arnold et al. 2005b	Drainage	Forestry	0.9	0	0	Sweden	57.133	14.75	57°08′	14°45′	/	5.6	789.598	Boreal	21	Shallow drainage	Peatland (bog)	/	overall	seasonally	Sedges	Cyperaceae	Peat soil	/	0-10	4.2	g kg-1	0-10	540	g kg-1	0-10	25		0-10	21.6	2001/9-2002/9	Annual		wet	weekly	Field, Chamber	g kg-1	0-10	540	28.2843	8	0.0523783	520
34	Salm et al. 2012	Drainage	Forestry	1.6	0	0	Estonia	58.437	25.237	58°26′12″	25°14′13″	/	11.7	760	Temperate	40	Shallow drainage	Peatland (bog)	ombrotrophic	overall	seasonally	Forest	Forest	Peat soil	/		/			/			/			/	2009/1-12	Annual		/	monthly	Field, Chamber			/	/	/		/
34	Salm et al. 2012	Drainage	Peat extraction	1.6	0	0	Estonia	58.437	25.237	58°26′12″	25°14′13″	/	11.7	760	Temperate	/	Deep drainage	Peatland (bog)	ombrotrophic	overall	seasonally	Forest	Forest	Peat soil	/		/			/			/			/	2009/1-12	Annual		/	monthly	Field, Chamber			/	/	/		/
35	Maljanen et al. 2010	Drainage	Forestry	/	0	0	/	60.35	25.05	60°21′	25°03′	/	/	/	Temperate	/	/	Peatland (bog)	ombrotrophic	overall	/	Forest	Forest	Peat soil	/		/			/			/			/	/	Annual		/	/	/			/	/	/		/
35	Maljanen et al. 2010	Drainage	Forestry	/	0	0	/	62.85	30.883	62°51′	30°53′	/	/	/	Temperate	/	/	Peatland (fen)	minerotrophic	overall	/	Forest	Forest	Peat soil	/		/			/			/			/	/	Annual		/	/	/			/	/	/		/
35	Maljanen et al. 2010	Drainage	Agriculture (N)	/	0	0	/	60.883	23.5	60°53′	23°30′	/	/	/	Temperate	/	/	/	minerotrophic	overall	/	/	/	/	/		/			/			/			/	/	Annual		/	/	/			/	/	/		/
35	Maljanen et al. 2010	Drainage	Agriculture	/	0	0	/	67.283	14.467	67°17′	14°28′	/	/	/	Temperate	/	/	/	minerotrophic	overall	/	/	/	/	/		/			/			/			/	/	Annual		/	/	/			/	/	/		/
35	Maljanen et al. 2010	Drainage	Peat extraction	/	0	0	/	60.35	25.05	60°21′	25°03′	/	/	/	Temperate	/	/	/	/	overall	/	/	/	/	/		/			/			/			/	/	Annual		/	/	/			/	/	/		/
36	Hergoualc’h and Verchot, 2014	Drainage	Forestry	/	0	0	Indonesia	64.083	18.167	64°05′	18°10′	/	26.3	/	Tropical	/	Shallow drainage	Swamp	ombrotrophic	overall	/	Forest	Forest	/	/		/			/			/			/	/	Annual		/	/	/			/	/	/		/
36	Hergoualc’h and Verchot, 2014	Drainage	Agriculture	/	0	0	Indonesia	64.083	18.167	64°05′	18°10′	/	26.3	/	Tropical	/	Deep drainage	Swamp	ombrotrophic	overall	/	Forest	Forest	/	/		/			/			/			/	/	Annual		/	/	/			/	/	/		/
36	Hergoualc’h and Verchot, 2014	Drainage	Agriculture	/	0	0	Indonesia	64.083	18.167	64°05′	18°10′	/	26.3	/	Tropical	/	Deep drainage	Swamp	ombrotrophic	overall	/	Forest	Forest	/	/		/			/			/			/	/	Annual		/	/	/			/	/	/		/
36	Hergoualc’h and Verchot, 2014	Drainage	Agriculture	/	0	0	Indonesia	64.083	18.167	64°05′	18°10′	/	26.3	/	Tropical	/	Deep drainage	Swamp	ombrotrophic	overall	/	Forest	Forest	/	/		/			/			/			/	/	Annual		/	/	/			/	/	/		/
37	Ma et al. 2018	Drainage	Grassland	/	0	0	China	34.267	102.433	34°16′	102°26′	3430	2.9	592.6	Temperate	/	/	Peatland (fen)	minerotrophic	overall	seasonally	Kobresia tibetica	Cyperaceae	Peat soil	Loam	0-60	7.92	g kg-1	0-60	38.1787	g kg-1	0-60	2.13		0-60	17.9243	2013/5-2014/5	Annual		/	weekly	Field, Chamber	g kg-1	0-60	38.1787	7.91183	4	0.207232	37.384
37	Ma et al. 2018	Drainage	Grassland	/	0	0	China	34.267	102.433	34°16′	102°26′	3430	2.9	592.6	Temperate	/	/	Peatland (fen)	minerotrophic	overall	seasonally	Kobresia tibetica	Cyperaceae	Peat soil	Loam	0-60	7.92	g kg-1	0-60	38.1787	g kg-1	0-60	2.13		0-60	17.9243	2013/5-2014/5	Annual		/	weekly	Field, Chamber	g kg-1	0-60	38.1787	7.91183	4	0.207232	31.5487
37	Ma et al. 2018	Drainage	Grassland	/	0	0	China	34.267	102.433	34°16′	102°26′	3430	2.9	592.6	Temperate	/	/	Peatland (fen)	minerotrophic	overall	seasonally	Kobresia tibetica	Cyperaceae	Peat soil	Loam	0-60	7.92	g kg-1	0-60	38.1787	g kg-1	0-60	2.13		0-60	17.9243	2013/5-2014/5	Annual		/	weekly	Field, Chamber	g kg-1	0-60	38.1787	7.91183	4	0.207232	31.1079
37	Ma et al. 2018	Drainage	Grassland	/	0	0	China	34.267	102.433	34°16′	102°26′	3430	2.9	592.6	Temperate	/	/	Peatland (fen)	minerotrophic	overall	seasonally	Kobresia tibetica	Cyperaceae	Peat soil	Loam	0-60	7.92	g kg-1	0-60	38.1787	g kg-1	0-60	2.13		0-60	17.9243	2014/5-2015/5	Annual		/	weekly	Field, Chamber	g kg-1	0-60	38.1787	7.91183	4	0.207232	37.384
37	Ma et al. 2018	Drainage	Grassland	/	0	0	China	34.267	102.433	34°16′	102°26′	3430	2.9	592.6	Temperate	/	/	Peatland (fen)	minerotrophic	overall	seasonally	Kobresia tibetica	Cyperaceae	Peat soil	Loam	0-60	7.92	g kg-1	0-60	38.1787	g kg-1	0-60	2.13		0-60	17.9243	2014/5-2015/5	Annual		/	weekly	Field, Chamber	g kg-1	0-60	38.1787	7.91183	4	0.207232	31.5487
37	Ma et al. 2018	Drainage	Grassland	/	0	0	China	34.267	102.433	34°16′	102°26′	3430	2.9	592.6	Temperate	/	/	Peatland (fen)	minerotrophic	overall	seasonally	Kobresia tibetica	Cyperaceae	Peat soil	Loam	0-60	7.92	g kg-1	0-60	38.1787	g kg-1	0-60	2.13		0-60	17.9243	2014/5-2015/5	Annual		/	weekly	Field, Chamber	g kg-1	0-60	38.1787	7.91183	4	0.207232	31.1079
38	Valbuena-Parralejo et al. 2019	Drainage	Grassland	/	0	0	Ireland	52.5	-8.2	52°30′	08°12′W	/	/	1017	Temperate	0.333333	/	Marsh	minerotrophic	overall	seasonally	Lolium perenne and Trifolium repens	Graminoid	Eutric gleysol	Sand	0-10	6.5			/			/			/	2011/5/27-10/26	Growing season	May to October	/	weekly	Field, Chamber			/	/	/		/
38	Valbuena-Parralejo et al. 2019	Drainage	Grassland	/	0	0	Ireland	52.5	-8.2	52°30′	08°12′W	/	/	1017	Temperate	0.0833333	Shallow drainage	Marsh	minerotrophic	overall	seasonally	Lolium perenne and Trifolium repens	Graminoid	Eutric gleysol	Sand	0-10	6.5	t C ha-1	0-10	149	t N ha-1 yr-1	0-10	16		0-10	9.3125	2014/1/10-6/10	Non-growing season	November 2014 to April 2015	/	weekly	Field, Chamber	t C ha-1	0-10	149	12.7435	4		149
38	Valbuena-Parralejo et al. 2019	Drainage	Grassland	/	0	0	Ireland	52.5	-8.2	52°30′	08°12′W	/	/	1017	Temperate	0.0833333	Shallow drainage	Marsh	minerotrophic	overall	seasonally	Lolium perenne and Trifolium repens	Graminoid	Eutric gleysol	Sand	0-10	6.5	t C ha-1	0-10	149	t N ha-1 yr-1	0-10	16		0-10	9.3125	2014/1/10-6/10	Non-growing season	November 2014 to April 2016	/	weekly	Field, Chamber	t C ha-1	0-10	149	12.7435	4		147
38	Valbuena-Parralejo et al. 2019	Drainage	Grassland	/	0	0	Ireland	52.5	-8.2	52°30′	08°12′W	/	/	1017	Temperate	0.0833333	Shallow drainage	Marsh	minerotrophic	overall	seasonally	Lolium perenne and Trifolium repens	Graminoid	Eutric gleysol	Sand	0-10	6.5	t C ha-1	0-10	149	t N ha-1 yr-1	0-10	16		0-10	9.3125	2014/1/10-6/10	Non-growing season	November 2014 to April 2017	/	weekly	Field, Chamber	t C ha-1	0-10	149	12.7435	4		143
38	Valbuena-Parralejo et al. 2019	Drainage	Grassland	/	0	0	Ireland	52.5	-8.2	52°30′	08°12′W	/	/	1017	Temperate	3	Shallow drainage	Marsh	minerotrophic	overall	seasonally	Lolium perenne and Trifolium repens	Graminoid	Eutric gleysol	Sand	0-10	6.5	t C ha-1	0-10	145	t N ha-1 yr-1	0-10	16		0-10	9.0625	2014/6/26-2015/7/25	Annual		/	weekly	Field, Chamber	t C ha-1	0-10	145	12.4014	4		140
39	Koskinene et al. 2016	Drainage	Forestry	/	0	0	Finland	61.8	24.3	61.80°	24.30°	/	/	/	Boreal	40	Shallow drainage	Swamp	minerotrophic	overall	seasonally	Vaccinium myrtillus	Shrub	/	/	0-30	4.015	g kg-1	0-30	507.5	g kg-1	0-30	15.8		0-30	32.1203	2012/06-09	Growing season	May to September	/	twice per week	Field, Chamber	g kg-1	0-30	507.5	3.53553	8	0.00696657	496.5
40	Laine et al. 2019a	Drainage	Forestry	/	0	0	Finland	64.8	24.617	64°48′	24°37′	/	4.3	570	Boreal	41	Deep drainage	Swamp	minerotrophic	overall	seasonally	Vaccinium uliginosum	Shrub	Peat soil	Sand	0-10	6.3	g kg-1	0-10	351.3			/			/	2011/06-11	Growing season	May to September	/	twice per week	Field, Chamber	g kg-1	0-10	351.3	30.0457			/
40	Laine et al. 2019a	Drainage	Forestry	/	0	0	Finland	64.8	24.617	64°48′	24°37′	/	4.3	570	Boreal	41	Shallow drainage	Swamp	minerotrophic	overall	seasonally	Vaccinium uliginosum	Shrub	Peat soil	Sand	0-10	6.6	g kg-1	0-10	351.3			/			/	2011/06-11	Growing season	May to September	/	twice per week	Field, Chamber	g kg-1	0-10	351.3	30.0457			/
40	Laine et al. 2019a	Drainage	Forestry	/	0	0	Finland	64.8	24.617	64°48′	24°37′	/	4.2	585	Boreal	42	Shallow drainage	Swamp	minerotrophic	overall	seasonally	Vaccinium uliginosum	Shrub	Peat soil	Sand	0-10	6.3	g kg-1	0-10	351.3			/			/	2013/05-11	Growing season	May to September	/	twice per week	Field, Chamber	g kg-1	0-10	351.3	30.0457			/
40	Laine et al. 2019a	Drainage	Forestry	/	0	0	Finland	64.8	24.617	64°48′	24°37′	/	4.2	585	Boreal	42	Shallow drainage	Swamp	minerotrophic	overall	seasonally	Vaccinium uliginosum	Shrub	Peat soil	Sand	0-10	6.6	g kg-1	0-10	351.3			/			/	2013/05-11	Growing season	May to September	/	twice per week	Field, Chamber	g kg-1	0-10	351.3	30.0457			/
41	Arai et al. 2014a	Drainage	Forestry	4.35	0	0	Indonesia	-2.35	114.033	2°21′S	114°02′	/	/	/	Tropical	/	/	Swamp	/	overall	/	deciduous forest	Forest	Histosol	/	0-10	3.6	g kg-1	0-10	540	g kg-1	0-10	13.3		0-10	40.6015	2009/07-2011/03	Annual		/	monthly	Field, Chamber	g kg-1	0-10	540	17.3205	3	0.032075	494
42	Swails et al. 2019	Drainage	Agriculture	2.225	0	0	Indonesia	-2.83	111.81	2.83° S	111.81°	/	27.4	2058	Tropical	7	Shallow drainage	Swamp	/	overall	seasonally	deciduous forest	Forest	Histosol	/		/			/			/			/	2014/01-2015/09	Annual		/	monthly	Field, Chamber			/	/	/		/
43	Muhr et al. 2011	Drainage	Water table manipulation	0.55	0	0	Germany	50.132	11.881	50°07′54″	11°52′51″	750	6.3	1020	Temperate	1.2	Shallow drainage	Peatland (fen)	minerotrophic	overall	seasonally	Molinia caerulea, Nardus stricta	Graminoid	Histosol	/		/			/			/			/	2007/01-2008/01	Annual		wet	weekly	Field, Chamber			/	/	/		/
43	Muhr et al. 2011	Drainage	Water table manipulation	0.55	0	0	Germany	50.132	11.881	50°07′54″	11°52′51″	750	6.3	1020	Temperate	2.2	Shallow drainage	Peatland (fen)	minerotrophic	overall	seasonally	Molinia caerulea, Nardus stricta,	Graminoid	Histosol	/		/			/			/			/	2008/01-2009/01	Annual		dry	weekly	Field, Chamber			/	/	/		/
44	Urbanová et al. 2012	Drainage	Forestry	/	0	0	Czech Republic	49.167	13.317	49°10′	13°19′	900	4	1000	Temperate	40	Deep drainage	Peatland (fen)	minerotrophic	overall	seasonally	Carex rostrata and S. flexuosum	Cyperaceae	/	/		/			/			/			/	2009/05-09	Growing season	May to September	wet	biweekly	Field, Chamber			/	/	/		/
44	Urbanová et al. 2012	Drainage	Forestry	/	0	0	Czech Republic	49.167	13.317	49°10′	13°19′	900	4	1000	Temperate	40	Deep drainage	Peatland (fen)	minerotrophic	overall	seasonally	Carex rostrata and S. flexuosum	Cyperaceae	/	/		/			/			/			/	2010/05-09	Growing season	May to September	wet	biweekly	Field, Chamber			/	/	/		/
44	Urbanová et al. 2012	Drainage	Forestry	/	0	0	Czech Republic	49.167	13.317	49°10′	13°19′	900	4	1000	Temperate	40	Deep drainage	Peatland (fen)	minerotrophic	overall	seasonally	Carex rostrata and S. flexuosum	Cyperaceae	/	/		/			/			/			/	2011/05-09	Growing season	May to September	dry	biweekly	Field, Chamber			/	/	/		/
44	Urbanová et al. 2012	Drainage	Forestry	/	0	0	Czech Republic	48.967	13.45	48°58′	13°27′	1200	3.2	1200	Temperate	40	Shallow drainage	Peatland (bog)	ombrotrophic	overall	seasonally	Trichophorum cespitosum, Eriophorum vaginatum and Carex limosa	Cyperaceae	/	/		/			/			/			/	2009/05-09	Growing season	May to September	wet	biweekly	Field, Chamber			/	/	/		/
44	Urbanová et al. 2012	Drainage	Forestry	/	0	0	Czech Republic	48.967	13.45	48°58′	13°27′	1200	3.2	1200	Temperate	40	Shallow drainage	Peatland (bog)	ombrotrophic	overall	seasonally	Trichophorum cespitosum, Eriophorum vaginatum and Carex limosa	Cyperaceae	/	/		/			/			/			/	2010/05-09	Growing season	May to September	wet	biweekly	Field, Chamber			/	/	/		/
44	Urbanová et al. 2012	Drainage	Forestry	/	0	0	Czech Republic	48.967	13.45	48°58′	13°27′	1200	3.2	1200	Temperate	40	Shallow drainage	Peatland (bog)	ombrotrophic	overall	seasonally	Trichophorum cespitosum, Eriophorum vaginatum and Carex limosa	Cyperaceae	/	/		/			/			/			/	2011/05-09	Growing season	May to September	dry	biweekly	Field, Chamber			/	/	/		/
45	Zhou et al. 2017	Drainage	Grassland	/	0	0	China	33.917	102.817	33°55′	102°49′	3441	0.9	656.8	Temperate	43	Deep drainage	Peatland (fen)	minerotrophic	hummock	permanently	Carex muliensis	Cyperaceae	/	/	0-10	7.5	g kg-1	0-10	206.37	g kg-1	0-10	13.85		0-10	14.9004	2013/06/04-10/27	Growing season	May to September	/	biweekly	Field, Chamber	g kg-1	0-10	206.37	34.7969	3	0.168614	146.983
45	Zhou et al. 2017	Drainage	Grassland	/	0	0	China	33.917	102.817	33°55′	102°49′	3441	0.9	656.8	Temperate	43	Deep drainage	Peatland (fen)	minerotrophic	hollow	permanently	Potamogeton pusillus and Utricularia vulgaris	Forbs	/	/	0-10	7.5	g kg-1	0-10	206.37	g kg-1	0-10	13.85		0-10	14.9004	2013/06/04-10/27	Growing season	May to September	/	biweekly	Field, Chamber	g kg-1	0-10	206.37	34.7969	3	0.168614	146.983
45	Zhou et al. 2017	Drainage	Grassland	/	0	0	China	33.917	102.817	33°55′	102°49′	3441	0.9	656.8	Temperate	43	Deep drainage	Peatland (fen)	minerotrophic	overall	permanently	/	Cyperaceae	/	/	0-10	7.5	g kg-1	0-10	206.37	g kg-1	0-10	13.85		0-10	14.9004	2013/06/04-10/27	Growing season	May to September	/	biweekly	Field, Chamber	g kg-1	0-10	206.37	34.7969	3	0.168614	146.983
45	Zhou et al. 2017	Drainage	Grassland	/	0	0	China	33.917	102.817	33°55′	102°49′	3441	0.9	656.8	Temperate	43	Deep drainage	Peatland (fen)	minerotrophic	hummock	seasonally	Kobresia tibetica	Cyperaceae	/	/	0-10	7.2	g kg-1	0-10	160.87	g kg-1	0-10	18.71		0-10	8.59808	2013/06/04-10/27	Growing season	May to September	/	biweekly	Field, Chamber	g kg-1	0-10	160.87	69.6804	3	0.433147	146.983
45	Zhou et al. 2017	Drainage	Grassland	/	0	0	China	33.917	102.817	33°55′	102°49′	3441	0.9	656.8	Temperate	43	Deep drainage	Peatland (fen)	minerotrophic	hollow	seasonally	Carex muliensis, Caltha scaposa	Cyperaceae	/	/	0-10	7.2	g kg-1	0-10	160.87	g kg-1	0-10	18.71		0-10	8.59808	2013/06/04-10/27	Growing season	May to September	/	biweekly	Field, Chamber	g kg-1	0-10	160.87	69.6804	3	0.433147	146.983
45	Zhou et al. 2017	Drainage	Grassland	/	0	0	China	33.917	102.817	33°55′	102°49′	3441	0.9	656.8	Temperate	43	Deep drainage	Peatland (fen)	minerotrophic	overall	seasonally	/	Cyperaceae	/	/	0-10	7.2	g kg-1	0-10	160.87	g kg-1	0-10	18.71		0-10	8.59808	2013/06/04-10/27	Growing season	May to September	/	biweekly	Field, Chamber	g kg-1	0-10	160.87	69.6804	3	0.433147	146.983
45	Zhou et al. 2017	Drainage	Grassland	/	0	0	China	33.917	102.817	33°55′	102°49′	3441	0.9	656.8	Temperate	43	Deep drainage	Peatland (fen)	minerotrophic	overall	permanently	/	Cyperaceae	/	/	0-10	7.5	g kg-1	0-10	206.37	g kg-1	0-10	13.85		0-10	14.9004	2013/06/04-10/27	Growing season	May to September	/	biweekly	Field, Chamber	g kg-1	0-10	206.37	34.7969	3	0.168614	126.97
45	Zhou et al. 2017	Drainage	Grassland	/	0	0	China	33.917	102.817	33°55′	102°49′	3441	0.9	656.8	Temperate	43	Deep drainage	Peatland (fen)	minerotrophic	overall	permanently	/	Cyperaceae	/	/	0-10	7.5	g kg-1	0-10	206.37	g kg-1	0-10	13.85		0-10	14.9004	2013/06/04-10/27	Growing season	May to September	/	biweekly	Field, Chamber	g kg-1	0-10	206.37	34.7969	3	0.168614	152.36
45	Zhou et al. 2017	Drainage	Grassland	/	0	0	China	33.917	102.817	33°55′	102°49′	3441	0.9	656.8	Temperate	43	Deep drainage	Peatland (fen)	minerotrophic	overall	permanently	/	Cyperaceae	/	/	0-10	7.5	g kg-1	0-10	206.37	g kg-1	0-10	13.85		0-10	14.9004	2013/06/04-10/27	Growing season	May to September	/	biweekly	Field, Chamber	g kg-1	0-10	206.37	34.7969	3	0.168614	161.62
45	Zhou et al. 2017	Drainage	Grassland	/	0	0	China	33.917	102.817	33°55′	102°49′	3441	0.9	656.8	Temperate	43	Deep drainage	Peatland (fen)	minerotrophic	overall	seasonally	/	Cyperaceae	/	/	0-10	7.2	g kg-1	0-10	160.87	g kg-1	0-10	18.71		0-10	8.59808	2013/06/04-10/27	Growing season	May to September	/	biweekly	Field, Chamber	g kg-1	0-10	160.87	69.6804	3	0.433147	126.97
45	Zhou et al. 2017	Drainage	Grassland	/	0	0	China	33.917	102.817	33°55′	102°49′	3441	0.9	656.8	Temperate	43	Deep drainage	Peatland (fen)	minerotrophic	overall	seasonally	/	Cyperaceae	/	/	0-10	7.2	g kg-1	0-10	160.87	g kg-1	0-10	18.71		0-10	8.59808	2013/06/04-10/27	Growing season	May to September	/	biweekly	Field, Chamber	g kg-1	0-10	160.87	69.6804	3	0.433147	152.36
45	Zhou et al. 2017	Drainage	Grassland	/	0	0	China	33.917	102.817	33°55′	102°49′	3441	0.9	656.8	Temperate	43	Deep drainage	Peatland (fen)	minerotrophic	overall	seasonally	/	Cyperaceae	/	/	0-10	7.2	g kg-1	0-10	206.37	g kg-1	0-10	18.71		0-10	11.0299	2013/06/04-10/27	Growing season	May to September	/	biweekly	Field, Chamber	g kg-1	0-10	206.37	34.7969	3	0.168614	161.62
46	Rachwal et al. 2014	Drainage	Agriculture	/	0	0	Brazil	-25.166	-50.079	25°09′59″S	50°04′45″W	857	16.5	1832	Subtropical	0.0833333	Deep drainage	Marsh	minerotrophic	overall	permanently	/	/	Histosol	Clay	0-20	5	g kg-1	0-20	276	g kg-1	0-20	20.4		0-20	13.5294	2010/9/10-2011/9/26	Annual		/	monthly	Field, Chamber	g kg-1	0-20	276	23.6055	5		/
47	Turetsky et al. 2008	Drainage	Water table manipulation	1	0	0	USA	64.82	-147.87	64.82°	147.87° W	/	-2.9	269	Boreal	0.166667	Shallow drainage	Peatland (fen)	minerotrophic	overall	seasonally	Moss and Sphagnum	Peat moss	/	/	0-20	5.3	g kg-1	0-20	410			/			/	2005/07/20-09/01	Growing season	May to September	wet	weekly	Field, Chamber	g kg-1	0-20	410	35.0661	3		/
47	Turetsky et al. 2008	Drainage	Water table manipulation	1	0	0	USA	64.82	-147.87	64.82°	147.87° W	/	-2.9	269	Boreal	1.16667	Shallow drainage	Peatland (fen)	minerotrophic	overall	seasonally	Moss and Sphagnum	Peat moss	/	/	0-20	5.3	g kg-1	0-20	410			/			/	2006/06/29-9/10	Growing season	May to September	dry	weekly	Field, Chamber	g kg-1	0-20	410	35.0661	3		/
48	Deng et al. 2015	Drainage	Water table manipulation	1	0	0	USA	64.82	-147.87	64.82°	147.87° W	/	-2.9	269	Boreal	0.0833333	Shallow drainage	Peatland (fen)	minerotrophic	overall	seasonally	Moss and Sphagnum	Peat moss	/	/	0-20	5.3	g kg-1	0-20	410			/			/	2005/07/20-09/01	Growing season	May to September	wet	weekly	Field, Chamber	g kg-1	0-20	410	35.0661	3		/
48	Deng et al. 2015	Drainage	Water table manipulation	1	0	0	USA	64.82	-147.87	64.82°	147.87° W	/	-2.9	269	Boreal	0.166667	Shallow drainage	Peatland (fen)	minerotrophic	overall	seasonally	Moss and Sphagnum	Peat moss	/	/	0-20	5.3	g kg-1	0-20	410			/			/	2006/06/29-9/10	Growing season	May to September	dry	weekly	Field, Chamber	g kg-1	0-20	410	35.0661	3		/
49	Chimner et al. 2016	Drainage	Water table manipulation	2.3	0	0	USA	46.317	-86.05	46°19′	86°03′W	/	5.1	835	Temperate	60	Shallow drainage	Peatland (fen)	minerotrophic	overall	seasonally	Sphagnum angustifolium	Peat moss	/	/	0-10	3.78			/			/			/	2010/05/01-09/26	Growing season	May to September	/	Half hour	Eddy covariance			/	/	/		/
49	Chimner et al. 2016	Drainage	Water table manipulation	2.3	0	0	USA	46.317	-86.05	46°19′	86°03′W	/	5.1	835	Temperate	61	Shallow drainage	Peatland (fen)	minerotrophic	overall	seasonally	Sphagnum angustifolium	Peat moss	/	/	0-10	3.78			/			/			/	2011/05/01-09/27	Growing season	May to September	/	Half hour	Eddy covariance			/	/	/		/
50	Wilson et al. 2016	Drainage	Peat extraction	0.5	0	0	Ireland	54.128	-9.556	54°07′40.8″	9°33′21.6″W	/	10.3	1245	Temperate	1	Deep drainage	Peatland (bog)	ombrotrophic	overall	seasonally	Juncus effusus, Sphagnumcu spidatum	Peat moss	/	/	0-10	3.8			/			/			/	2012, 2013	Annual		/	monthly	Field, Chamber			/	/	/		/
50	Wilson et al. 2016	Drainage	Peat extraction	0.5	0	0	Ireland	54.128	-9.556	54°07′40.8″	9°33′21.6″W	/	10.3	1245	Temperate	1	Deep drainage	Peatland (bog)	ombrotrophic	overall	seasonally	Juncus effusus, Sphagnumcu spidatum	Peat moss	/	/	0-10	3.8			/			/			/	2012, 2013	Annual		/	monthly	Field, Chamber			/	/	/		/
51	Eickenscheidt et al. 2014	Drainage	Forestry	0.6	0	0	Germany	48.367	11.667	48°22′	11°40′	449	7.5	787	Temperate	45	Deep drainage	Peatland (fen)	minerotrophic	overall	seasonally	Phragmites australis and Carex acutiformis	Graminoid	Fluvisol	/		/	g kg-1	0-10	352	g kg-1	0-10	28		0-10	12.5714	2010/12-2012/01	Annual		/	biweekly	Field, Chamber	g kg-1	0-10	352	24.2487	3	0.0688884	146
51	Eickenscheidt et al. 2014	Drainage	Forestry	0.6	0	0	Germany	48.367	11.667	48°22′	11°40′	449	7.5	787	Temperate	45	Deep drainage	Peatland (fen)	minerotrophic	overall	seasonally	Phragmites australis and Carex acutiformis	Graminoid	Fluvisol	/		/	g kg-1	0-10	352	g kg-1	0-10	28		0-10	12.5714	2010/12-2012/01	Annual		/	biweekly	Field, Chamber	g kg-1	0-10	352	24.2487	3	0.0688884	97
52	Jauhiainen et al. 2012	Drainage	Forestry	2.5	0	0	Indonesia	-2.322	113.902	2°19′18.2″ S	113°54′07.7″	/	25.6	2700	Tropical	16	Deep drainage	Swamp	/	overall	seasonally	Forest	Forest	/	/	10-100	3.3	g kg-1	10-15	553	g kg-1	10-15	16		10-15	34.5625	2001-2002	Annual		/	twice per week	Field, Chamber	g kg-1	10-15	553	7	4	0.0126582	543
53	Kwon et al. 2017	Drainage	Water table manipulation	/	0	0	Russia	68.613	161.341	68°36′47″	161°20′29″	/	/	/	Boreal	10	Shallow drainage	Marsh	/	overall	seasonally	Carex appendiculata, Eriophorum angustifolium	Cyperaceae	/	Clay		/			/			/			/	2013/07/24-08/10	Growing season	June to September	wet	twice per week	Field, Chamber			/	/	/		/
53	Kwon et al. 2017	Drainage	Water table manipulation	/	0	0	Russia	68.613	161.341	68°36′47″	161°20′29″	/	/	/	Boreal	11	Shallow drainage	Marsh	/	overall	seasonally	Carex appendiculata, Eriophorum angustifolium	Cyperaceae	/	Clay		/			/			/			/	2013/07/24-08/10	Growing season	June to September	dry	twice per week	Field, Chamber			/	/	/		/
53	Kwon et al. 2017	Drainage	Water table manipulation	/	0	0	Russia	68.613	161.341	68°36′47″	161°20′29″	/	/	/	Boreal	10	Shallow drainage	Marsh	/	overall	seasonally	Carex appendiculata, Eriophorum angustifolium	Cyperaceae	/	Clay		/			/			/			/	2014/06/20-08/20	Growing season	June to September	wet	twice per week	Field, Chamber			/	/	/		/
53	Kwon et al. 2017	Drainage	Water table manipulation	/	0	0	Russia	68.613	161.341	68°36′47″	161°20′29″	/	/	/	Boreal	11	Shallow drainage	Marsh	/	overall	seasonally	Carex appendiculata, Eriophorum angustifolium	Cyperaceae	/	Clay		/			/			/			/	2014/06/20-08/20	Growing season	June to September	dry	twice per week	Field, Chamber			/	/	/		/
53	Kwon et al. 2017	Drainage	Water table manipulation	/	0	0	Russia	68.613	161.341	68°36′47″	161°20′29″	/	/	/	Boreal	11	/	Marsh	/	overall	seasonally	Carex appendiculata, Eriophorum angustifolium	Cyperaceae	/	Clay		/			/			/			/	2013/11/1-11/30	Non-growing season	October 2013 to May 2014	/	twice per week	Field, Chamber			/	/	/		/
54	Mustamo et al. 2016	Drainage	Forestry	1.75	0	0	Finland	71.53	47.02	71.53°	47.02°	/	/	/	Boreal	41	Shallow drainage	Peatland (bog)	minerotrophic	overall	seasonally	Sphagnum mosses	Peat moss	/	/	0-15	4.1	g kg-1	0-15	574.246	g kg-1	0-15	4.7		0-15	122.18	2011/06-10	Growing season	June to October	/	weekly	Field, Chamber	g kg-1	0-15	574.246	49.1136	10		562.645
54	Mustamo et al. 2016	Drainage	Peat extraction	1.75	0	0	Finland	71.53	47.02	71.53°	47.02°	/	/	/	Boreal	6	Deep drainage	Peatland (bog)	minerotrophic	overall	seasonally	Sphagnum mosses	Peat moss	/	/	0-15	4.1	g kg-1	0-15	574.246	g kg-1	0-15	4.7		0-15	122.18	2011/06-10	Growing season	June to October	/	weekly	Field, Chamber	g kg-1	0-15	574.246	49.1136	10		551.044
55	Yamulki et al. 2013	Drainage	Forestry	4.6	0	0	UK	56.146	-4.3	56°08′47″	4°18′ W	15	9.4	1672	Temperate	88	Shallow drainage	Peatland (bog)	ombrotrophic	overall	seasonally	Sphagnum mosses	Peat moss	/	Clay	0-10	3.61	g kg-1	0-15	499.4	g kg-1	0-10	16.6		0-15	30.0843	2008/02-2009/02	Annual		wet	biweekly	Field, Chamber	g kg-1	0-15	499.4	7.96743	3	0.015954	506.5
55	Yamulki et al. 2013	Drainage	Forestry	5.6	0	0	UK	56.146	-4.3	56°08′47″	4°18′ W	15	9.4	1311	Temperate	89	Shallow drainage	Peatland (bog)	ombrotrophic	overall	seasonally	Sphagnum mosses	Peat moss	/	Clay	0-10	3.61	g kg-1	0-15	499.4	g kg-1	0-10	16.6		0-15	30.0843	2009/02-2009/12	Annual		dry	monthly	Field, Chamber	g kg-1	0-15	499.4	7.96743	3	0.015954	506.5
56	Keating Jr. et al. 2016	Drainage	Agriculture	/	0	0	USA	34.502	-90.424	34°30′08.48″	90°25′26.82″W	/	/	/	Temperate	/	/	/	/	overall	/	Limnobium spongia, Polygonum persicaria	Forbs	/	Clay		/			/			/			/	2013/06-08	Growing season	May to October	/	weekly	Field, Chamber			/	/	/		/
58	Carter et al. 2012	Drainage	Forestry	/	0	0	Estonia	58.867	26.233	58°52′	26°14′	80	4.3	889	Temperate	58	Shallow drainage	Peatland (bog)	ombrotrophic	overall	seasonally	Sphagnum fuscum, Sphagnum rubellum	Peat moss	Histosol	/	0-15	3.4	g kg-1	0-15	530	g kg-1	0-15	6		0-15	88.3333	2008-2009	Annual		/	monthly	Field, Chamber	g kg-1	0-15	530	45.3294	3		430
59	Cao et al. 2018	Low drainage	Grassland	5.15	0	0	China	32.8	102.55	32°48′	102°33′	3500	1.7	756	Temperate	0.333333	Shallow drainage	Peatland (fen)	minerotrophic	overall	seasonally	Scirpus pumilus, Blysmus sinocompressus, Carex muliensis, Kobresia humilis	Cyperaceae	/	/	0-10	6.7	g kg-1	0-10	350	g kg-1	0-10	15		0-10	23.3333	2013/08-2016/12	Annual		/	monthly	Field, Chamber	g kg-1	0-10	350	29.9345	6		/
59	Cao et al. 2018	High drainage	Grassland	5.15	0	0	China	32.8	102.55	32°48′	102°33′	3500	1.7	756	Temperate	0.333333	Shallow drainage	Peatland (fen)	minerotrophic	overall	seasonally	Scirpus pumilus, Blysmus sinocompressus, Carex muliensis, Kobresia humilis	Cyperaceae	/	/	0-10	6.7	g kg-1	0-10	350	g kg-1	0-10	15		0-10	23.3333	2013/08-2016/12	Annual		/	monthly	Field, Chamber	g kg-1	0-10	350	29.9345	6		/
60	Mojeremane et al. 2012	Drainage	Forestry	0.275	0	0	UK	55.167	-2.05	55°10′	2°3′W	300	7.6	950	Temperate	0.166667	/	Swamp	minerotrophic	overall	seasonally	Festuca ovina, Deschampsia flexusosa	Graminoid	Peaty gley	/	0-10	4	g kg-1	0-10	460.92	g kg-1	0-10	18.41		0-10	25.0364	2006/06-2007/06	Annual		/	monthly	Field, Chamber	g kg-1	0-10	460.92	8.6949	3	0.0188642	429.43
60	Mojeremane et al. 2012	Drainage	Forestry	0.275	0	0	UK	55.167	-2.05	55°10′	2°3′W	300	7.6	950	Temperate	0.166667	/	Swamp	minerotrophic	overall	seasonally	Festuca ovina, Deschampsia flexusosa	Graminoid	Peaty gley	/	0-10	4	g kg-1	0-10	460.92	g kg-1	0-10	18.41		0-10	25.0364	2007/06-2008/06	Annual		/	monthly	Field, Chamber	g kg-1	0-10	460.92	8.6949	3	0.0188642	429.43
61	Ishikura et al. 2018	Drainage	Forestry	2.9	0	0	Indonesia	-2.583	113.167	2°35′S	113°10′	/	26.1	2452	Tropical	15	Shallow drainage	Swamp	/	overall	seasonally	Shorea balangeran (Korth.) Burck, C. rotundatus, Xanthophyllum eurhynchu	Forest	Haplofibrist	/	0-10	3.9	g kg-1	0-10	555	g kg-1	0-10	18.6		0-10	29.8387	2011/07-10	Dry season	June to October	dry	biweekly	Field, Chamber	g kg-1	0-10	555	8	2	0.0144144	513
62	Laine et al. 2019b	Drainage	Water table manipulation	/	0	0	Finland	61.8	24.316	61°48′	24°19′	/	3.5	700	Boreal	3	/	Peatland (fen)	minerotrophic	overall	seasonally	Carex lasiocarpa, Carex chordorrhiza, and Carex limosa	Cyperaceae	/	/		/			/		/	/			/	2011/05-10	Growing season	May to October	dry	weekly	Field, Chamber			/	/	/		/
62	Laine et al. 2019b	Drainage	Water table manipulation	/	0	0	Finland	61.8	24.316	61°48′	24°19′	/	3.5	700	Boreal	4	/	Peatland (fen)	minerotrophic	overall	seasonally	Carex lasiocarpa, Carex chordorrhiza, and Carex limosa	Cyperaceae	/	/		/			/		/	/			/	2011/05-10	Growing season	May to October	wet	weekly	Field, Chamber			/	/	/		/
62	Laine et al. 2019b	Drainage	Water table manipulation	/	0	0	Finland	68	24.2	67°60′	24°12′	/	3.5	700	Boreal	3	/	Peatland (fen)	minerotrophic	overall	seasonally	Carex rostrata	Cyperaceae	/	/		/			/		/	/			/	2012/06-10	Growing season	May to October	dry	weekly	Field, Chamber			/	/	/		/
62	Laine et al. 2019b	Drainage	Water table manipulation	/	0	0	Finland	68	24.2	67°60′	24°12′	/	-1.4	511	Boreal	4	/	Peatland (fen)	minerotrophic	overall	seasonally	Carex rostrata	Cyperaceae	/	/		/			/		/	/			/	2012/06-10	Growing season	May to October	wet	weekly	Field, Chamber			/	/	/		/
63	Dommain et al. 2018	Drainage	Agriculture	12	0	0	Malaysia	4.167	114.25	4°10′	114°15′	/	/	/	Tropical	/	Deep drainage	Swamp	/	overall	seasonally	Forest	Forest	/	/		/			/		/	/			/	/	Annual		/	/	Field, Chamber			/	/	/		/
63	Dommain et al. 2018	Drainage	Agriculture	7	0	0	Malaysia	-0.233	109.417	0°14′S	109°25′	/	/	/	Tropical	/	Deep drainage	Swamp	/	overall	seasonally	Forest	Forest	/	/		/			/		/	/			/	/	Annual		/	/	Field, Chamber			/	/	/		/
63	Dommain et al. 2018	Drainage	Agriculture	2.2	0	0	Malaysia	4.517	114.083	4°31′	114°05′	/	/	/	Tropical	/	Deep drainage	Swamp	/	overall	seasonally	Forest	Forest	/	/		/			/		/	/			/	/	Annual		/	/	Field, Chamber			/	/	/		/
63	Dommain et al. 2018	Drainage	Agriculture	9.9	0	0	Malaysia	0.867	102.133	0°52′	102°08′	/	/	/	Tropical	/	Deep drainage	Swamp	/	overall	seasonally	Forest	Forest	/	/		/			/		/	/			/	/	Annual		/	/	Field, Chamber			/	/	/		/
63	Dommain et al. 2018	Drainage	Agriculture	3	0	0	Malaysia	-1.95	103.917	1°57′S	103°55′	/	/	/	Tropical	/	Deep drainage	Swamp	/	overall	seasonally	Forest	Forest	/	/		/			/		/	/			/	/	Annual		/	/	Field, Chamber			/	/	/		/
64	Silvola et al. 1996	Drainage	Forestry	2.15	0	0	Finland	61.783	24.3	61°47′	24°18′	/	/	/	Boreal	30	Shallow drainage	Peatland (bog)	ombrotrophic	overall	seasonally	Sedges	Cyperaceae	/	/	0-10	3.9			/	g kg-1	0-20	6			/	/	Annual		/	/	Field, Chamber			/	/	/		/
64	Silvola et al. 1996	Drainage	Forestry	2.15	0	0	Finland	61.783	24.3	61°47′	24°18′	/	/	/	Boreal	30	Shallow drainage	Peatland (bog)	ombrotrophic	overall	seasonally	Sedges	Cyperaceae	/	/	0-10	3.9			/	g kg-1	0-20	6			/	/	Annual		/	/	Field, Chamber			/	/	/		/
64	Silvola et al. 1996	Drainage	Forestry	2.3	0	0	Finland	61.783	24.3	61°47′	24°18′	/	/	/	Boreal	30	Shallow drainage	Peatland (bog)	ombrotrophic	overall	seasonally	Sedges	Cyperaceae	/	/	0-10	3.8			/	g kg-1	0-20	5			/	/	Annual		/	/	Field, Chamber			/	/	/		/
64	Silvola et al. 1996	Drainage	Forestry	3.3	0	0	Finland	61.783	24.3	61°47′	24°18′	/	/	/	Boreal	30	Shallow drainage	Peatland (bog)	ombrotrophic	overall	seasonally	Sedges	Cyperaceae	/	/	0-10	3.8			/	g kg-1	0-20	5			/	/	Annual		/	/	Field, Chamber			/	/	/		/
64	Silvola et al. 1996	Drainage	Forestry	2.15	0	0	Finland	61.783	24.3	61°47′	24°18′	/	/	/	Boreal	30	Shallow drainage	Peatland (bog)	ombrotrophic	overall	seasonally	Sedges	Cyperaceae	/	/	0-10	3.8			/	g kg-1	0-20	9			/	/	Annual		/	/	Field, Chamber			/	/	/		/
64	Silvola et al. 1996	Drainage	Forestry	2.15	0	0	Finland	61.783	24.3	61°47′	24°18′	/	/	/	Boreal	30	Shallow drainage	Peatland (bog)	ombrotrophic	overall	seasonally	Sedges	Cyperaceae	/	/	0-10	3.8			/	g kg-1	0-20	9			/	/	Annual		/	/	Field, Chamber			/	/	/		/
64	Silvola et al. 1996	Drainage	Forestry	2.55	0	0	Finland	61.783	24.3	61°47′	24°18′	/	/	/	Boreal	30	Shallow drainage	Peatland (bog)	ombrotrophic	overall	seasonally	Sedges	Cyperaceae	/	/	0-10	3.8			/	g kg-1	0-20	9			/	/	Annual		/	/	Field, Chamber			/	/	/		/
64	Silvola et al. 1996	Drainage	Forestry	2.55	0	0	Finland	61.783	24.3	61°47′	24°18′	/	/	/	Boreal	30	Shallow drainage	Peatland (bog)	ombrotrophic	overall	seasonally	Sedges	Cyperaceae	/	/	0-10	3.8			/	g kg-1	0-20	9			/	/	Annual		/	/	Field, Chamber			/	/	/		/
64	Silvola et al. 1996	Drainage	Forestry	1.6	0	0	Finland	61.783	24.3	61°47′	24°18′	/	/	/	Boreal	30	Shallow drainage	Peatland (fen)	minerotrophic	overall	seasonally	Sedges	Cyperaceae	/	/	0-10	5.6			/	g kg-1	0-20	19			/	/	Annual		/	/	Field, Chamber			/	/	/		/
64	Silvola et al. 1996	Drainage	Forestry	1.6	0	0	Finland	61.783	24.3	61°47′	24°18′	/	/	/	Boreal	30	Shallow drainage	Peatland (fen)	minerotrophic	overall	seasonally	Sedges	Cyperaceae	/	/	0-10	5.6			/	g kg-1	0-20	19			/	/	Annual		/	/	Field, Chamber			/	/	/		/
64	Silvola et al. 1996	Drainage	Forestry	1.9	0	0	Finland	61.783	24.3	61°47′	24°18′	/	/	/	Boreal	30	Shallow drainage	Peatland (fen)	minerotrophic	overall	seasonally	Sedges	Cyperaceae	/	/	0-10	4.4			/	g kg-1	0-20	14			/	/	Annual		/	/	Field, Chamber			/	/	/		/
64	Silvola et al. 1996	Drainage	Forestry	1.9	0	0	Finland	61.783	24.3	61°47′	24°18′	/	/	/	Boreal	30	Shallow drainage	Peatland (fen)	minerotrophic	overall	seasonally	Sedges	Cyperaceae	/	/	0-10	4.4			/	g kg-1	0-20	14			/	/	Annual		/	/	Field, Chamber			/	/	/		/
64	Silvola et al. 1996	Drainage	Forestry	0.5	0	0	Finland	61.783	24.3	61°47′	24°18′	/	/	/	Boreal	30	Shallow drainage	Peatland (fen)	minerotrophic	overall	seasonally	Sedges	Cyperaceae	/	/	0-10	4.5			/	g kg-1	0-20	15			/	/	Annual		/	/	Field, Chamber			/	/	/		/
64	Silvola et al. 1996	Drainage	Forestry	2	0	0	Finland	62.767	30.967	62°46′	30°58′	/	/	/	Boreal	24	Shallow drainage	Peatland (bog)	ombrotrophic	overall	seasonally	Sphagnum fuscum	Peat moss	/	/	0-10	/			/	g kg-1	0-20	/			/	/	Annual		/	/	Field, Chamber			/	/	/		/
64	Silvola et al. 1996	Drainage	Forestry	2	0	0	Finland	62.767	30.967	62°46′	30°58′	/	/	/	Boreal	25	Shallow drainage	Peatland (bog)	ombrotrophic	overall	seasonally	Sphagnum fuscum	Peat moss	/	/	0-10	/			/	g kg-1	0-20	/			/	/	Annual		/	/	Field, Chamber			/	/	/		/
65	Hirano et al. 2012	Drainage	Forestry	2.5	0	0	Indonesia	-2.32	113.9	2.32° S	113.90°	/	26.1	2561	Tropical	8	/	Swamp	ombrotrophic	overall	seasonally	Combretocarpus rotundatus, Cratoxylum arborescens, Buchanania sessifolia, and Tetramerista glabra	Forest	/	/		/			/			/			/	2004-2005	Annual		/	daily	Eddy covariance			/	/	/		/
65	Hirano et al. 2012	Drainage	Forestry	2.5	0	0	Indonesia	-2.32	113.9	2.32° S	113.90°	/	25.9	2510	Tropical	9	/	Swamp	ombrotrophic	overall	seasonally	Combretocarpus rotundatus, Cratoxylum arborescens, Buchanania sessifolia, and Tetramerista glabra	Forest	/	/		/			/			/			/	2005-2006	Annual		/	daily	Eddy covariance			/	/	/		/
65	Hirano et al. 2012	Drainage	Forestry	2.5	0	0	Indonesia	-2.32	113.9	2.32° S	113.90°	/	26	2360	Tropical	10	/	Swamp	ombrotrophic	overall	seasonally	Combretocarpus rotundatus, Cratoxylum arborescens, Buchanania sessifolia, and Tetramerista glabra	Forest	/	/		/			/			/			/	2006-2007	Annual		/	daily	Eddy covariance			/	/	/		/
65	Hirano et al. 2012	Drainage	Forestry	2.5	0	0	Indonesia	-2.32	113.9	2.32° S	113.90°	/	26	2442	Tropical	11	/	Swamp	ombrotrophic	overall	seasonally	Combretocarpus rotundatus, Cratoxylum arborescens, Buchanania sessifolia, and Tetramerista glabra	Forest	/	/		/			/			/			/	2007-2008	Annual		/	daily	Eddy covariance			/	/	/		/
66	Regina et al. 1996	Drainage	Forestry	/	0	0	Finland	61.783	24.3	61°47′	24°18′	/	/	/	Boreal	30	Shallow drainage	Peatland (fen)	minerotrophic	overall	seasonally	Sedges	Cyperaceae	/	/	0-20	5			/	μg cm-3	0-20	1300			/	1991	Growing season	May to September	/	monthly	Field, Chamber			/	/	/		/
66	Regina et al. 1996	Drainage	Forestry	/	0	0	Finland	61.783	24.3	61°47′	24°18′	/	/	/	Boreal	30	Shallow drainage	Peatland (fen)	minerotrophic	overall	seasonally	Sedges	Cyperaceae	/	/	0-20	4.4			/	μg cm-3	0-20	890			/	1991	Growing season	May to September	/	monthly	Field, Chamber			/	/	/		/
66	Regina et al. 1996	Drainage	Forestry	/	0	0	Finland	61.783	24.3	61°47′	24°18′	/	/	/	Boreal	30	Deep drainage	Peatland (fen)	minerotrophic	overall	seasonally	Sedges	Cyperaceae	/	/	0-20	/			/	μg cm-3	0-20	/			/	1991	Growing season	May to September	/	monthly	Field, Chamber			/	/	/		/
66	Regina et al. 1996	Drainage	Forestry	/	0	0	Finland	61.783	24.3	61°47′	24°18′	/	/	/	Boreal	30	/	Peatland (fen)	minerotrophic	overall	seasonally	Sedges	Cyperaceae	/	/	0-20	4.5			/	μg cm-3	0-20	260			/	1991	Growing season	May to September	/	monthly	Field, Chamber			/	/	/		/
66	Regina et al. 1996	Drainage	Forestry	/	0	0	Finland	61.767	30.967	62°46′	30°58′	/	/	/	Boreal	50	Shallow drainage	Peatland (bog)	ombrotrophic	overall	seasonally	Sphagnum fuscum	Peat moss	/	/	0-20	3.8			/	μg cm-3	0-20	380			/	1991	Growing season	May to September	/	monthly	Field, Chamber			/	/	/		/
66	Regina et al. 1996	Drainage	Forestry	/	0	0	Finland	61.767	30.967	62°46′	30°58′	/	/	/	Boreal	50	Shallow drainage	Peatland (bog)	ombrotrophic	overall	seasonally	Sphagnum fuscum	Peat moss	/	/	0-20	4.3			/	μg cm-3	0-20	170			/	1991	Growing season	May to September	/	monthly	Field, Chamber			/	/	/		/
66	Regina et al. 1996	Drainage	Forestry	/	0	0	Finland	61.767	30.967	62°46′	30°58′	/	/	/	Boreal	50	Shallow drainage	Peatland (bog)	ombrotrophic	hummock	seasonally	Sphagnum fuscum	Peat moss	/	/	0-20	3.8			/	μg cm-3	0-20	530			/	1991	Growing season	May to September	/	monthly	Field, Chamber			/	/	/		/
66	Regina et al. 1996	Drainage	Forestry	/	0	0	Finland	61.767	30.967	62°46′	30°58′	/	/	/	Boreal	50	Shallow drainage	Peatland (bog)	ombrotrophic	overall	seasonally	Sphagnum fuscum	Peat moss	/	/	0-20	4.3			/	μg cm-3	0-20	/			/	1991	Growing season	May to September	/	monthly	Field, Chamber			/	/	/		/
66	Regina et al. 1996	Drainage	Forestry	/	0	0	Finland	61.767	30.967	62°46′	30°58′	/	/	/	Boreal	50	Shallow drainage	Peatland (bog)	ombrotrophic	overall	seasonally	Sphagnum fuscum	Peat moss	/	/	0-20	4.2			/	μg cm-3	0-20	210			/	1991	Growing season	May to September	/	monthly	Field, Chamber			/	/	/		/
66	Regina et al. 1996	Drainage	Forestry	/	0	0	Finland	61.767	30.967	62°46′	30°58′	/	/	/	Boreal	50	/	Peatland (bog)	ombrotrophic	overall	seasonally	Sphagnum fuscum	Peat moss	/	/	0-20	4.1			/	μg cm-3	0-20	110			/	1991	Growing season	May to September	/	monthly	Field, Chamber			/	/	/		/
66	Regina et al. 1996	Drainage	Forestry	/	0	0	Finland	61.783	24.3	61°47′	24°18′	/	/	/	Boreal	30	Shallow drainage	Peatland (fen)	minerotrophic	overall	seasonally	Sedges	Cyperaceae	/	/	0-20	5			/	μg cm-3	0-20	1300			/	1992	Growing season	May to September	/	monthly	Field, Chamber			/	/	/		/
66	Regina et al. 1996	Drainage	Forestry	/	0	0	Finland	61.783	24.3	61°47′	24°18′	/	/	/	Boreal	30	Shallow drainage	Peatland (fen)	minerotrophic	overall	seasonally	Sedges	Cyperaceae	/	/	0-20	4.4			/	μg cm-3	0-20	890			/	1992	Growing season	May to September	/	monthly	Field, Chamber			/	/	/		/
66	Regina et al. 1996	Drainage	Forestry	/	0	0	Finland	61.783	24.3	61°47′	24°18′	/	/	/	Boreal	30	Deep drainage	Peatland (fen)	minerotrophic	overall	seasonally	Sedges	Cyperaceae	/	/	0-20	/			/	μg cm-3	0-20	/			/	1992	Growing season	May to September	/	monthly	Field, Chamber			/	/	/		/
66	Regina et al. 1996	Drainage	Forestry	/	0	0	Finland	61.783	24.3	61°47′	24°18′	/	/	/	Boreal	30	/	Peatland (fen)	minerotrophic	overall	seasonally	Sedges	Cyperaceae	/	/	0-20	4.5			/	μg cm-3	0-20	260			/	1992	Growing season	May to September	/	monthly	Field, Chamber			/	/	/		/
66	Regina et al. 1996	Drainage	Forestry	/	0	0	Finland	61.767	30.967	62°46′	30°58′	/	/	/	Boreal	50	Shallow drainage	Peatland (bog)	ombrotrophic	overall	seasonally	Sphagnum fuscum	Peat moss	/	/	0-20	3.8			/	μg cm-3	0-20	380			/	1992	Growing season	May to September	/	monthly	Field, Chamber			/	/	/		/
66	Regina et al. 1996	Drainage	Forestry	/	0	0	Finland	61.767	30.967	62°46′	30°58′	/	/	/	Boreal	50	Shallow drainage	Peatland (bog)	ombrotrophic	overall	seasonally	Sphagnum fuscum	Peat moss	/	/	0-20	4.3			/	μg cm-3	0-20	170			/	1992	Growing season	May to September	/	monthly	Field, Chamber			/	/	/		/
66	Regina et al. 1996	Drainage	Forestry	/	0	0	Finland	61.767	30.967	62°46′	30°58′	/	/	/	Boreal	50	Shallow drainage	Peatland (bog)	ombrotrophic	hummock	seasonally	Sphagnum fuscum	Peat moss	/	/	0-20	3.8			/	μg cm-3	0-20	530			/	1992	Growing season	May to September	/	monthly	Field, Chamber			/	/	/		/
66	Regina et al. 1996	Drainage	Forestry	/	0	0	Finland	61.767	30.967	62°46′	30°58′	/	/	/	Boreal	50	Shallow drainage	Peatland (bog)	ombrotrophic	overall	seasonally	Sphagnum fuscum	Peat moss	/	/	0-20	4.3			/	μg cm-3	0-20	/			/	1992	Growing season	May to September	/	monthly	Field, Chamber			/	/	/		/
66	Regina et al. 1996	Drainage	Forestry	/	0	0	Finland	61.767	30.967	62°46′	30°58′	/	/	/	Boreal	50	Shallow drainage	Peatland (bog)	ombrotrophic	overall	seasonally	Sphagnum fuscum	Peat moss	/	/	0-20	4.2			/	μg cm-3	0-20	210			/	1992	Growing season	May to September	/	monthly	Field, Chamber			/	/	/		/
66	Regina et al. 1996	Drainage	Forestry	/	0	0	Finland	61.767	30.967	62°46′	30°58′	/	/	/	Boreal	50	/	Peatland (bog)	ombrotrophic	overall	seasonally	Sphagnum fuscum	Peat moss	/	/	0-20	4.1			/	μg cm-3	0-20	110			/	1992	Growing season	May to September	/	monthly	Field, Chamber			/	/	/		/
67	Funk et al. 1994	Drainage	Water table manipulation	/	0	0	USA	64.844	-147.723	64°50′37″	147°43′23″W	/	/	/	Boreal	0.25	Shallow drainage	Peatland (bog)	ombrotrophic	overall	seasonally	Sphagnum angustifolium and Aulacomnium palustre	Peat moss	/	/		/			/			/			/	1992	Growing season	May to September	/	weekly	Field, Chamber			/	/	/		/
68	Ballantyne et al. 2014	Drainage	Forestry	1.15	0	0	USA	46.317	-86.05	46°19′	86°03′W	/	5.1	835	Temperate	80	Shallow drainage	Peatland (fen)	ombrotrophic	overall	seasonally	Chamaedaphne calyculata, Ledum groenlandicum,	Graminoid	/	/	0-10	3.78			/			/			/	2009-2010	Growing season	April to October	/	biweekly	Field, Chamber			/	/	/		/
68	Ballantyne et al. 2014	Drainage	Forestry	1.15	0	0	USA	46.317	-86.05	46°19′	86°03′W	/	5.1	835	Temperate	80	/	Peatland (fen)	ombrotrophic	hummock	seasonally	Chamaedaphne calyculata, Ledum groenlandicum,	Graminoid	/	/		/			/			/			/	2009-2010	Growing season	April to October	/	biweekly	Field, Chamber			/	/	/		/
68	Ballantyne et al. 2014	Drainage	Forestry	1.15	0	0	USA	46.317	-86.05	46°19′	86°03′W	/	5.1	835	Temperate	80	/	Peatland (fen)	ombrotrophic	hollow	seasonally	Chamaedaphne calyculata, Ledum groenlandicum,	Graminoid	/	/		/			/			/			/	2009-2010	Growing season	April to October	/	biweekly	Field, Chamber			/	/	/		/
69	Hughes et al. 1999	Drainage	Water table manipulation	2	0	0	England	52.467	-3.75	52°28′	3°45′W	/	/	/	Temperate	/	Shallow drainage	Peatland (bog)	ombrotrophic	overall	seasonally	Juncun and Sphagnum fuscum	Peat moss	/	/	0-10	4.7			/			/			/	1992	Annual		/	biweekly	Field, Chamber			/	/	/		/
69	Hughes et al. 1999	Drainage	Water table manipulation	2	0	0	England	52.467	-3.75	52°28′	3°45′W	/	/	2592.07	Temperate	/	Shallow drainage	Peatland (bog)	ombrotrophic	overall	seasonally	Juncun and Sphagnum fuscum	Peat moss	/	/	0-10	4.7			/			/			/	1993	Annual		/	biweekly	Field, Chamber			/	/	/		/
69	Hughes et al. 1999	Drainage	Water table manipulation	2	0	0	England	52.467	-3.75	52°28′	3°45′W	/	/	2997.06	Temperate	/	Shallow drainage	Peatland (bog)	ombrotrophic	overall	seasonally	Juncun and Sphagnum fuscum	Peat moss	/	/	0-10	4.7			/			/			/	1994	Annual		/	biweekly	Field, Chamber			/	/	/		/
69	Hughes et al. 1999	Drainage	Water table manipulation	2	0	0	England	52.467	-3.75	52°28′	3°45′W	/	/	2098.8	Temperate	/	Shallow drainage	Peatland (bog)	ombrotrophic	overall	seasonally	Juncun and Sphagnum fuscum	Peat moss	/	/	0-10	4.7			/			/			/	1995	Annual		/	biweekly	Field, Chamber			/	/	/		/
69	Hughes et al. 1999	Drainage	Water table manipulation	2	0	0	England	52.467	-3.75	52°28′	3°45′W	/	/	2024.17	Temperate	/	Shallow drainage	Peatland (bog)	ombrotrophic	overall	seasonally	Juncun and Sphagnum fuscum	Peat moss	/	/	0-10	4.7			/			/			/	1996	Annual		/	biweekly	Field, Chamber			/	/	/		/
69	Hughes et al. 1999	Drainage	Water table manipulation	2	0	0	England	52.467	-3.75	52°28′	3°45′W	/	/	2371.66	Temperate	/	Shallow drainage	Peatland (bog)	ombrotrophic	overall	seasonally	Juncun and Sphagnum fuscum	Peat moss	/	/	0-10	4.7			/			/			/	1997	Annual		/	biweekly	Field, Chamber			/	/	/		/
70	Roulet et al. 1993	High drainage	Forestry	/	0	0	Canada	49.05	-80.667	49°03′	80°40′W	/	0.6	885	Temperate	7	Deep drainage	Peatland (fen)	minerotrophic	hummock	seasonally	Sphagnum fuscum	Peat moss	/	/	0-10	6.3			/			/			/	1991/5/12-10/23	Growing season	May to October	/	10-day interval	Field, Chamber			/	/	/		/
70	Roulet et al. 1993	High drainage	Forestry	/	0	0	Canada	49.05	-80.667	49°03′	80°40′W	/	0.6	885	Temperate	7	Shallow drainage	Peatland (fen)	minerotrophic	hummock	seasonally	Sphagnum fuscum	Peat moss	/	/	0-10	6.3			/			/			/	1991/5/12-10/23	Growing season	May to October	/	10-day interval	Field, Chamber			/	/	/		/
70	Roulet et al. 1993	Medium drainage	Forestry	/	0	0	Canada	49.05	-80.667	49°03′	80°40′W	/	0.6	885	Temperate	7	Deep drainage	Peatland (fen)	minerotrophic	hummock	seasonally	Sphagnum fuscum	Peat moss	/	/	0-10	6.3			/			/			/	1991/5/12-10/23	Growing season	May to October	/	10-day interval	Field, Chamber			/	/	/		/
70	Roulet et al. 1993	Low drainage	Forestry	/	0	0	Canada	49.05	-80.667	49°03′	80°40′W	/	0.6	885	Temperate	7	Shallow drainage	Peatland (fen)	minerotrophic	hummock	seasonally	Sphagnum fuscum	Peat moss	/	/	0-10	6.3			/			/			/	1991/5/12-10/23	Growing season	May to October	/	10-day interval	Field, Chamber			/	/	/		/
70	Roulet et al. 1993	High drainage	Forestry	/	0	0	Canada	49.05	-80.667	49°03′	80°40′W	/	0.6	885	Temperate	7	Deep drainage	Peatland (fen)	minerotrophic	hollow	seasonally	Warnstorfia exannulates	Peat moss	/	/	0-10	6.3			/			/			/	1991/5/12-10/23	Growing season	May to October	/	10-day interval	Field, Chamber			/	/	/		/
70	Roulet et al. 1993	High drainage	Forestry	/	0	0	Canada	49.05	-80.667	49°03′	80°40′W	/	0.6	885	Temperate	7	Shallow drainage	Peatland (fen)	minerotrophic	hollow	seasonally	Warnstorfia exannulates	Peat moss	/	/	0-10	6.3			/			/			/	1991/5/12-10/23	Growing season	May to October	/	10-day interval	Field, Chamber			/	/	/		/
70	Roulet et al. 1993	Medium drainage	Forestry	/	0	0	Canada	49.05	-80.667	49°03′	80°40′W	/	0.6	885	Temperate	7	Deep drainage	Peatland (fen)	minerotrophic	hollow	seasonally	Warnstorfia exannulates	Peat moss	/	/	0-10	6.3			/			/			/	1991/5/12-10/23	Growing season	May to October	/	10-day interval	Field, Chamber			/	/	/		/
70	Roulet et al. 1993	Low drainage	Forestry	/	0	0	Canada	49.05	-80.667	49°03′	80°40′W	/	0.6	885	Temperate	7	Shallow drainage	Peatland (fen)	minerotrophic	hollow	seasonally	Warnstorfia exannulates	Peat moss	/	/	0-10	6.3			/			/			/	1991/5/12-10/23	Growing season	May to October	/	10-day interval	Field, Chamber			/	/	/		/
70	Roulet et al. 1993	High drainage	Forestry	/	0	0	Canada	49.05	-80.667	49°03′	80°40′W	/	0.6	885	Temperate	7	Deep drainage	Peatland (fen)	minerotrophic	lawn	seasonally	S. russowii, Potentilla fruticosa	Peat moss	/	/	0-10	6.3			/			/			/	1991/5/12-10/23	Growing season	May to October	/	10-day interval	Field, Chamber			/	/	/		/
70	Roulet et al. 1993	High drainage	Forestry	/	0	0	Canada	49.05	-80.667	49°03′	80°40′W	/	0.6	885	Temperate	7	Shallow drainage	Peatland (fen)	minerotrophic	lawn	seasonally	S. russowii, Potentilla fruticosa	Peat moss	/	/	0-10	6.3			/			/			/	1991/5/12-10/23	Growing season	May to October	/	10-day interval	Field, Chamber			/	/	/		/
70	Roulet et al. 1993	Medium drainage	Forestry	/	0	0	Canada	49.05	-80.667	49°03′	80°40′W	/	0.6	885	Temperate	7	Deep drainage	Peatland (fen)	minerotrophic	lawn	seasonally	S. russowii, Potentilla fruticosa	Peat moss	/	/	0-10	6.3			/			/			/	1991/5/12-10/23	Growing season	May to October	/	10-day interval	Field, Chamber			/	/	/		/
70	Roulet et al. 1993	Low drainage	Forestry	/	0	0	Canada	49.05	-80.667	49°03′	80°40′W	/	0.6	885	Temperate	7	Shallow drainage	Peatland (fen)	minerotrophic	lawn	seasonally	S. russowii, Potentilla fruticosa	Peat moss	/	/	0-10	4.6			/			/			/	1991/5/12-10/23	Growing season	May to October	/	10-day interval	Field, Chamber			/	/	/		/
70	Roulet et al. 1993	High drainage	Forestry	/	0	0	Canada	49.05	-80.667	49°03′	80°40′W	/	0.6	885	Temperate	7	Shallow drainage	Peatland (bog)	ombrotrophic	hummock	seasonally	Sphagnum fuscum	Peat moss	/	/	0-10	4.6			/			/			/	1991/5/12-10/23	Growing season	May to October	/	10-day interval	Field, Chamber			/	/	/		/
70	Roulet et al. 1993	High drainage	Forestry	/	0	0	Canada	49.05	-80.667	49°03′	80°40′W	/	0.6	885	Temperate	7	Shallow drainage	Peatland (bog)	ombrotrophic	hummock	seasonally	Sphagnum fuscum	Peat moss	/	/	0-10	4.6			/			/			/	1991/5/12-10/23	Growing season	May to October	/	10-day interval	Field, Chamber			/	/	/		/
70	Roulet et al. 1993	Medium drainage	Forestry	/	0	0	Canada	49.05	-80.667	49°03′	80°40′W	/	0.6	885	Temperate	7	Shallow drainage	Peatland (bog)	ombrotrophic	hummock	seasonally	Sphagnum fuscum	Peat moss	/	/	0-10	4.6			/			/			/	1991/5/12-10/23	Growing season	May to October	/	10-day interval	Field, Chamber			/	/	/		/
70	Roulet et al. 1993	Low drainage	Forestry	/	0	0	Canada	49.05	-80.667	49°03′	80°40′W	/	0.6	885	Temperate	7	Shallow drainage	Peatland (bog)	ombrotrophic	hummock	seasonally	Sphagnum fuscum	Peat moss	/	/	0-10	4.6			/			/			/	1991/5/12-10/23	Growing season	May to October	/	10-day interval	Field, Chamber			/	/	/		/
70	Roulet et al. 1993	High drainage	Forestry	/	0	0	Canada	49.05	-80.667	49°03′	80°40′W	/	0.6	885	Temperate	7	Shallow drainage	Peatland (bog)	ombrotrophic	hollow	seasonally	Sphagnum angutifolium	Peat moss	/	/	0-10	4.6			/			/			/	1991/5/12-10/23	Growing season	May to October	/	10-day interval	Field, Chamber			/	/	/		/
70	Roulet et al. 1993	High drainage	Forestry	/	0	0	Canada	49.05	-80.667	49°03′	80°40′W	/	0.6	885	Temperate	7	Shallow drainage	Peatland (bog)	ombrotrophic	hollow	seasonally	Sphagnum angutifolium	Peat moss	/	/	0-10	4.6			/			/			/	1991/5/12-10/23	Growing season	May to October	/	10-day interval	Field, Chamber			/	/	/		/
70	Roulet et al. 1993	Medium drainage	Forestry	/	0	0	Canada	49.05	-80.667	49°03′	80°40′W	/	0.6	885	Temperate	7	Shallow drainage	Peatland (bog)	ombrotrophic	hollow	seasonally	Sphagnum angutifolium	Peat moss	/	/	0-10	4.6			/			/			/	1991/5/12-10/23	Growing season	May to October	/	10-day interval	Field, Chamber			/	/	/		/
70	Roulet et al. 1993	Low drainage	Forestry	/	0	0	Canada	49.05	-80.667	49°03′	80°40′W	/	0.6	885	Temperate	7	Shallow drainage	Peatland (bog)	ombrotrophic	hollow	seasonally	Sphagnum angutifolium	Peat moss	/	/	0-10	4.6			/			/			/	1991/5/12-10/23	Growing season	May to October	/	10-day interval	Field, Chamber			/	/	/		/
70	Roulet et al. 1993	High drainage	Forestry	/	0	0	Canada	49.05	-80.667	49°03′	80°40′W	/	0.6	885	Temperate	7	Shallow drainage	Peatland (bog)	ombrotrophic	lawn	seasonally	Sphagnum angutifolium	Peat moss	/	/	0-10	4.6			/			/			/	1991/5/12-10/23	Growing season	May to October	/	10-day interval	Field, Chamber			/	/	/		/
70	Roulet et al. 1993	High drainage	Forestry	/	0	0	Canada	49.05	-80.667	49°03′	80°40′W	/	0.6	885	Temperate	7	Shallow drainage	Peatland (bog)	ombrotrophic	lawn	seasonally	Sphagnum angutifolium	Peat moss	/	/	0-10	4.6			/			/			/	1991/5/12-10/23	Growing season	May to October	/	10-day interval	Field, Chamber			/	/	/		/
70	Roulet et al. 1993	Medium drainage	Forestry	/	0	0	Canada	49.05	-80.667	49°03′	80°40′W	/	0.6	885	Temperate	7	Shallow drainage	Peatland (bog)	ombrotrophic	lawn	seasonally	Sphagnum angutifolium	Peat moss	/	/	0-10	4.6			/			/			/	1991/5/12-10/23	Growing season	May to October	/	10-day interval	Field, Chamber			/	/	/		/
70	Roulet et al. 1993	Low drainage	Forestry	/	0	0	Canada	49.05	-80.667	49°03′	80°40′W	/	0.6	885	Temperate	7	Shallow drainage	Peatland (bog)	ombrotrophic	lawn	seasonally	Sphagnum angutifolium	Peat moss	/	/	0-10	4.6			/			/			/	1991/5/12-10/23	Growing season	May to October	/	10-day interval	Field, Chamber			/	/	/		/
70	Roulet et al. 1993	High drainage	Forestry	/	0	0	Canada	49.05	-80.667	49°03′	80°40′W	/	0.6	885	Temperate	7	Shallow drainage	Peatland (bog)	ombrotrophic	hummock	seasonally	Sphagnum fuscum	Peat moss	/	/	0-10	4.5			/			/			/	1991/5/12-10/23	Growing season	May to October	/	10-day interval	Field, Chamber			/	/	/		/
70	Roulet et al. 1993	High drainage	Forestry	/	0	0	Canada	49.05	-80.667	49°03′	80°40′W	/	0.6	885	Temperate	7	Deep drainage	Peatland (bog)	ombrotrophic	hummock	seasonally	Sphagnum fuscum	Peat moss	/	/	0-10	4.5			/			/			/	1991/5/12-10/23	Growing season	May to October	/	10-day interval	Field, Chamber			/	/	/		/
70	Roulet et al. 1993	Medium drainage	Forestry	/	0	0	Canada	49.05	-80.667	49°03′	80°40′W	/	0.6	885	Temperate	7	Deep drainage	Peatland (bog)	ombrotrophic	hummock	seasonally	Sphagnum fuscum	Peat moss	/	/	0-10	4.5			/			/			/	1991/5/12-10/23	Growing season	May to October	/	10-day interval	Field, Chamber			/	/	/		/
70	Roulet et al. 1993	Low drainage	Forestry	/	0	0	Canada	49.05	-80.667	49°03′	80°40′W	/	0.6	885	Temperate	7	Deep drainage	Peatland (bog)	ombrotrophic	hummock	seasonally	Sphagnum fuscum	Peat moss	/	/	0-10	4.5			/			/			/	1991/5/12-10/23	Growing season	May to October	/	10-day interval	Field, Chamber			/	/	/		/
70	Roulet et al. 1993	High drainage	Forestry	/	0	0	Canada	49.05	-80.667	49°03′	80°40′W	/	0.6	885	Temperate	7	Shallow drainage	Peatland (bog)	ombrotrophic	hollow	seasonally	Sphagnum angutifolium	Peat moss	/	/	0-10	4.5			/			/			/	1991/5/12-10/23	Growing season	May to October	/	10-day interval	Field, Chamber			/	/	/		/
70	Roulet et al. 1993	High drainage	Forestry	/	0	0	Canada	49.05	-80.667	49°03′	80°40′W	/	0.6	885	Temperate	7	Deep drainage	Peatland (bog)	ombrotrophic	hollow	seasonally	Sphagnum angutifolium	Peat moss	/	/	0-10	4.5			/			/			/	1991/5/12-10/23	Growing season	May to October	/	10-day interval	Field, Chamber			/	/	/		/
70	Roulet et al. 1993	Medium drainage	Forestry	/	0	0	Canada	49.05	-80.667	49°03′	80°40′W	/	0.6	885	Temperate	7	Deep drainage	Peatland (bog)	ombrotrophic	hollow	seasonally	Sphagnum angutifolium	Peat moss	/	/	0-10	4.5			/			/			/	1991/5/12-10/23	Growing season	May to October	/	10-day interval	Field, Chamber			/	/	/		/
70	Roulet et al. 1993	Low drainage	Forestry	/	0	0	Canada	49.05	-80.667	49°03′	80°40′W	/	0.6	885	Temperate	7	Deep drainage	Peatland (bog)	ombrotrophic	hollow	seasonally	Sphagnum angutifolium	Peat moss	/	/	0-10	4.5			/			/			/	1991/5/12-10/23	Growing season	May to October	/	10-day interval	Field, Chamber			/	/	/		/
70	Roulet et al. 1993	High drainage	Forestry	/	0	0	Canada	49.05	-80.667	49°03′	80°40′W	/	0.6	885	Temperate	7	Shallow drainage	Peatland (bog)	ombrotrophic	lawn	seasonally	Pleurozium schreberi	Peat moss	/	/	0-10	4.5			/			/			/	1991/5/12-10/23	Growing season	May to October	/	10-day interval	Field, Chamber			/	/	/		/
70	Roulet et al. 1993	High drainage	Forestry	/	0	0	Canada	49.05	-80.667	49°03′	80°40′W	/	0.6	885	Temperate	7	Deep drainage	Peatland (bog)	ombrotrophic	lawn	seasonally	Pleurozium schreberi	Peat moss	/	/	0-10	4.5			/			/			/	1991/5/12-10/23	Growing season	May to October	/	10-day interval	Field, Chamber			/	/	/		/
70	Roulet et al. 1993	Medium drainage	Forestry	/	0	0	Canada	49.05	-80.667	49°03′	80°40′W	/	0.6	885	Temperate	7	Deep drainage	Peatland (bog)	ombrotrophic	lawn	seasonally	Pleurozium schreberi	Peat moss	/	/	0-10	4.5			/			/			/	1991/5/12-10/23	Growing season	May to October	/	10-day interval	Field, Chamber			/	/	/		/
70	Roulet et al. 1993	Low drainage	Forestry	/	0	0	Canada	49.05	-80.667	49°03′	80°40′W	/	0.6	885	Temperate	7	Deep drainage	Peatland (bog)	ombrotrophic	lawn	seasonally	Pleurozium schreberi	Peat moss	/	/	0-10	4.5			/			/			/	1991/5/12-10/23	Growing season	May to October	/	10-day interval	Field, Chamber			/	/	/		/
71	Nykanen et al. 1998	Drainage	Forestry	2.1	0	0	Finland	61.783	24.3	61°47′	24°18′	150	3	709	Boreal	30	Shallow drainage	Peatland (bog)	ombrotrophic	overall	seasonally	Empetrum nigrum, Eriophorum vaginatum	Cyperaceae	/	/	0-10	3.9			/	g kg-1	0-10	6			/	1991	Annual		/	biweekly	Field, Chamber			/	/	/		/
71	Nykanen et al. 1998	Drainage	Forestry	2.1	0	0	Finland	61.783	24.3	61°47′	24°18′	150	3	709	Boreal	31	Shallow drainage	Peatland (bog)	ombrotrophic	overall	seasonally	Empetrum nigrum, Eriophorum vaginatum	Cyperaceae	/	/	0-10	3.9			/	g kg-1	0-10	6			/	1992	Annual		/	biweekly	Field, Chamber			/	/	/		/
71	Nykanen et al. 1998	Drainage	Forestry	2.3	0	0	Finland	61.783	24.3	61°47′	24°18′	150	3	709	Boreal	30	Shallow drainage	Peatland (bog)	ombrotrophic	hummock	seasonally	Empetrum nigrum, Eriophorum vaginatum	Cyperaceae	/	/	0-10	3.8			/	g kg-1	0-10	5			/	1991	Annual		/	biweekly	Field, Chamber			/	/	/		/
71	Nykanen et al. 1998	Drainage	Forestry	2.3	0	0	Finland	61.783	24.3	61°47′	24°18′	150	3	709	Boreal	31	Shallow drainage	Peatland (bog)	ombrotrophic	hummock	seasonally	Empetrum nigrum, Eriophorum vaginatum	Cyperaceae	/	/	0-10	3.8			/	g kg-1	0-10	5			/	1992	Annual		/	biweekly	Field, Chamber			/	/	/		/
71	Nykanen et al. 1998	Drainage	Forestry	1.9	0	0	Finland	61.783	24.3	61°47′	24°18′	150	3	709	Boreal	30	Shallow drainage	Peatland (bog)	ombrotrophic	overall	seasonally	Empetrum nigrum, Eriophorum vaginatum	Cyperaceae	/	/	0-10	3.8			/	g kg-1	0-10	9			/	1991	Annual		/	biweekly	Field, Chamber			/	/	/		/
71	Nykanen et al. 1998	Drainage	Forestry	1.9	0	0	Finland	61.783	24.3	61°47′	24°18′	150	3	709	Boreal	31	Shallow drainage	Peatland (bog)	ombrotrophic	overall	seasonally	Empetrum nigrum, Eriophorum vaginatum	Cyperaceae	/	/	0-10	3.8			/	g kg-1	0-10	9			/	1992	Annual		/	biweekly	Field, Chamber			/	/	/		/
71	Nykanen et al. 1998	Drainage	Forestry	2	0	0	Finland	61.783	24.3	61°47′	24°18′	150	3	709	Boreal	30	Shallow drainage	Peatland (bog)	ombrotrophic	overall	seasonally	Sphagnum fuscum	Peat moss	/	/	0-10	4.3			/	g kg-1	0-10	14			/	1991	Annual		/	biweekly	Field, Chamber			/	/	/		/
71	Nykanen et al. 1998	Drainage	Forestry	2	0	0	Finland	61.783	24.3	61°47′	24°18′	150	3	709	Boreal	31	Shallow drainage	Peatland (bog)	ombrotrophic	overall	seasonally	Sphagnum fuscum	Peat moss	/	/	0-10	4.3			/	g kg-1	0-10	14			/	1992	Annual		/	biweekly	Field, Chamber			/	/	/		/
71	Nykanen et al. 1998	Drainage	Forestry	2.5	0	0	Finland	61.783	24.3	61°47′	24°18′	150	3	709	Boreal	30	Shallow drainage	Peatland (bog)	ombrotrophic	overall	seasonally	Empetrum nigrum, Eriophorum vaginatum	Cyperaceae	/	/	0-10	3.8			/	g kg-1	0-10	9			/	1991	Annual		/	biweekly	Field, Chamber			/	/	/		/
71	Nykanen et al. 1998	Drainage	Forestry	2.5	0	0	Finland	61.783	24.3	61°47′	24°18′	150	3	709	Boreal	31	Shallow drainage	Peatland (bog)	ombrotrophic	overall	seasonally	Empetrum nigrum, Eriophorum vaginatum	Cyperaceae	/	/	0-10	3.8			/	g kg-1	0-10	9			/	1992	Annual		/	biweekly	Field, Chamber			/	/	/		/
71	Nykanen et al. 1998	Drainage	Forestry	1.6	0	0	Finland	62.767	29.833	62°46′	29°50′	145	1.9	650	Boreal	50	Shallow drainage	Peatland (fen)	minerotrophic	overall	seasonally	Betula nana, Carex lasiocarpa	Cyperaceae	/	/	0-10	5.6			/	g kg-1	0-10	19			/	1991	Annual		/	biweekly	Field, Chamber			/	/	/		/
71	Nykanen et al. 1998	Drainage	Forestry	1.6	0	0	Finland	62.767	29.833	62°46′	29°50′	145	1.9	650	Boreal	51	Deep drainage	Peatland (fen)	minerotrophic	overall	seasonally	Betula nana, Carex lasiocarpa	Cyperaceae	/	/	0-10	5.6			/	g kg-1	0-10	19			/	1992	Annual		/	biweekly	Field, Chamber			/	/	/		/
71	Nykanen et al. 1998	Drainage	Forestry	1.9	0	0	Finland	62.767	29.833	62°46′	29°50′	145	1.9	650	Boreal	50	Shallow drainage	Peatland (fen)	minerotrophic	overall	seasonally	Eriophorum vaginatum, Picea abies	Cyperaceae	/	/	0-10	4.4			/	g kg-1	0-10	14			/	1991	Annual		/	biweekly	Field, Chamber			/	/	/		/
71	Nykanen et al. 1998	Drainage	Forestry	1.9	0	0	Finland	62.767	29.833	62°46′	29°50′	145	1.9	650	Boreal	51	Shallow drainage	Peatland (fen)	minerotrophic	overall	seasonally	Eriophorum vaginatum, Picea abies	Cyperaceae	/	/	0-10	4.4			/	g kg-1	0-10	14			/	1992	Annual		/	biweekly	Field, Chamber			/	/	/		/
71	Nykanen et al. 1999	Drainage	Forestry	0.5	0	0	Finland	62.783	29.85	62°47′	29°51′	145	1.9	650	Boreal	50	Shallow drainage	Peatland (fen)	minerotrophic	overall	seasonally	Betula nana	Cyperaceae	/	/		/			/			/			/	1992	Annual		/	biweekly	Field, Chamber			/	/	/		/
72	Yang et al. 2019	Drainage	Grassland	1.4	0	0	China	33.1	102.65	33°06′	102°39′	3471	1.5	756	Temperate	/	Shallow drainage	Marsh	/	/	seasonally	Carex mulienses	Cyperaceae	/	/	0-30	5.67	g kg-1	0-10	251.7	g kg-1	0-30	17.5		0-10	14.3829	2012/06-2014/12	Annual		/	monthly	Field, Chamber	g kg-1	0-10	251.7	4.8151	3	0.0191303	264.8
72	Yang et al. 2019	Drainage	Grassland	1.4	0	0	China	33.1	102.65	33°06′	102°39′	3471	1.5	756	Temperate	/	Shallow drainage	Marsh	/	/	seasonally	Carex mulienses	Cyperaceae	/	/	0-30	5.67	g kg-1	0-10	251.7	g kg-1	0-30	17.5		0-10	14.3829	2012/06-2014/12	Annual		/	monthly	Field, Chamber	g kg-1	0-10	251.7	4.8151	3	0.0191303	91.4
73	Updegraff et al. 2001	Drainage	Water table manipulation	/	0	0	USA	47	-92	47°00′	92°00′W	/	/	/	Temperate	1	Shallow drainage	Peatland (fen)	minerotrophic	overall	seasonally	Carex lasiocarpa, Carex livida	Cyperaceae	/	/		/			/			/			/	1995/05-1995/10	Growing season	May to October	/	weekly	Field, Chamber			/	/	/		/
73	Updegraff et al. 2001	Drainage	Water table manipulation	/	0	0	USA	47	-92	47°00′	92°00′W	/	/	/	Temperate	2	Shallow drainage	Peatland (fen)	minerotrophic	overall	seasonally	Carex lasiocarpa, Carex livida	Cyperaceae	/	/		/			/			/			/	1996/05-1996/10	Growing season	May to October	/	weekly	Field, Chamber			/	/	/		/
73	Updegraff et al. 2001	Drainage	Water table manipulation	/	0	0	USA	47	-92	47°00′	92°00′W	/	/	/	Temperate	3	Shallow drainage	Peatland (fen)	minerotrophic	overall	seasonally	Carex lasiocarpa, Carex livida	Cyperaceae	/	/		/			/			/			/	1997/05-1997/10	Growing season	May to October	/	weekly	Field, Chamber			/	/	/		/
73	Updegraff et al. 2001	Drainage	Water table manipulation	/	0	0	USA	47	-92	47°00′	92°00′W	/	/	/	Temperate	1	Shallow drainage	Peatland (bog)	ombrotrophic	overall	seasonally	Sphagnum fuscum, Sphagnum capillifolium	Peat moss	/	/		/			/			/			/	1995/05-1995/10	Growing season	May to October	/	weekly	Field, Chamber			/	/	/		/
73	Updegraff et al. 2001	Drainage	Water table manipulation	/	0	0	USA	47	-92	47°00′	92°00′W	/	/	/	Temperate	2	Shallow drainage	Peatland (bog)	ombrotrophic	overall	seasonally	Sphagnum fuscum, Sphagnum capillifolium	Peat moss	/	/		/			/			/			/	1996/05-1996/10	Growing season	May to October	/	weekly	Field, Chamber			/	/	/		/
73	Updegraff et al. 2001	Drainage	Water table manipulation	/	0	0	USA	47	-92	47°00′	92°00′W	/	/	/	Temperate	3	Shallow drainage	Peatland (bog)	ombrotrophic	overall	seasonally	Sphagnum fuscum, Sphagnum capillifolium	Peat moss	/	/		/			/			/			/	1997/05-1997/10	Growing season	May to October	/	weekly	Field, Chamber			/	/	/		/
74	Strack and Waddington, 2007	Drainage	Water table manipulation	1.2	0	0	Canada	46.667	-71.167	46°40′	71°10′W	/	/	/	Temperate	1	Shallow drainage	Peatland (fen)	ombrotrophic	hummock	seasonally	Sphagnum magellanicum, Sphagnum rubellum, Chamaedaphne calyculata, Vaccinium oxycoccus	Peat moss	/	/		/			/			/			/	2002/06/10-08/31	Growing season	May to September	dry	weekly	Field, Chamber			/	/	/		/
74	Strack and Waddington, 2007	Drainage	Water table manipulation	1.2	0	0	Canada	46.667	-71.167	46°40′	71°10′W	/	/	/	Temperate	2	Shallow drainage	Peatland (fen)	ombrotrophic	hummock	seasonally	Sphagnum magellanicum, Sphagnum rubellum, Chamaedaphne calyculata, Vaccinium oxycoccus	Peat moss	/	/		/			/			/			/	2002/06/10-08/31	Growing season	May to September	wet	weekly	Field, Chamber			/	/	/		/
74	Strack and Waddington, 2007	Drainage	Water table manipulation	1.2	0	0	Canada	46.667	-71.167	46°40′	71°10′W	/	/	/	Temperate	3	Shallow drainage	Peatland (fen)	ombrotrophic	hummock	seasonally	Sphagnum magellanicum, Sphagnum rubellum, Chamaedaphne calyculata, Vaccinium oxycoccus	Peat moss	/	/		/			/			/			/	2002/06/10-08/31	Growing season	May to September	wet	weekly	Field, Chamber			/	/	/		/
74	Strack and Waddington, 2007	Drainage	Water table manipulation	1.2	0	0	Canada	46.667	-71.167	46°40′	71°10′W	/	/	/	Temperate	1	Shallow drainage	Peatland (fen)	ombrotrophic	lawn	seasonally	Sphagnum papillosum, Sphagnum majus, Carex oligosperma and Carex limosa	Peat moss	/	/		/			/			/			/	2002/05/12-08/31	Growing season	May to September	dry	weekly	Field, Chamber			/	/	/		/
74	Strack and Waddington, 2007	Drainage	Water table manipulation	1.2	0	0	Canada	46.667	-71.167	46°40′	71°10′W	/	/	/	Temperate	2	Shallow drainage	Peatland (fen)	ombrotrophic	lawn	seasonally	Sphagnum papillosum, Sphagnum majus, Carex oligosperma and Carex limosa	Peat moss	/	/		/			/			/			/	2002/05/12-08/31	Growing season	May to September	wet	weekly	Field, Chamber			/	/	/		/
74	Strack and Waddington, 2007	Drainage	Water table manipulation	1.2	0	0	Canada	46.667	-71.167	46°40′	71°10′W	/	/	/	Temperate	3	Shallow drainage	Peatland (fen)	ombrotrophic	lawn	seasonally	Sphagnum papillosum, Sphagnum majus, Carex oligosperma and Carex limosa	Peat moss	/	/		/			/			/			/	2002/05/12-08/31	Growing season	May to September	wet	weekly	Field, Chamber			/	/	/		/
74	Strack and Waddington, 2007	Drainage	Water table manipulation	1.2	0	0	Canada	46.667	-71.167	46°40′	71°10′W	/	/	/	Temperate	1	Shallow drainage	Peatland (fen)	ombrotrophic	hollow	seasonally	Gymnocolea inflata, Cladopodiella fluitans	Cyperaceae	/	/		/			/			/			/	2002/05/09-08/19	Growing season	May to September	dry	weekly	Field, Chamber			/	/	/		/
74	Strack and Waddington, 2007	Drainage	Water table manipulation	1.2	0	0	Canada	46.667	-71.167	46°40′	71°10′W	/	/	/	Temperate	2	Shallow drainage	Peatland (fen)	ombrotrophic	hollow	seasonally	Gymnocolea inflata, Cladopodiella fluitans	Cyperaceae	/	/		/			/			/			/	2002/05/09-08/19	Growing season	May to September	wet	weekly	Field, Chamber			/	/	/		/
74	Strack and Waddington, 2007	Drainage	Water table manipulation	1.2	0	0	Canada	46.667	-71.167	46°40′	71°10′W	/	/	/	Temperate	3	Shallow drainage	Peatland (fen)	ombrotrophic	hollow	seasonally	Gymnocolea inflata, Cladopodiella fluitans	Cyperaceae	/	/		/			/			/			/	2002/05/09-08/19	Growing season	May to September	wet	weekly	Field, Chamber			/	/	/		/
75	Strack et al. 2006	Drainage	Water table manipulation	1.2	0	0	Canada	46.667	-71.167	46°40′	71°10′W	/	/	/	Temperate	8	Shallow drainage	Peatland (fen)	ombrotrophic	hummock	seasonally	Sphagnum papillosum	Peat moss	/	/		/			/			/			/	2001/07-10	Growing season	May to September	wet	weekly	Field, Chamber			/	/	/		/
75	Strack et al. 2006	Drainage	Water table manipulation	1.2	0	0	Canada	46.667	-71.167	46°40′	71°10′W	/	/	/	Temperate	8	Shallow drainage	Peatland (fen)	ombrotrophic	lawn	seasonally	Polytrichum strictum	Peat moss	/	/		/			/			/			/	2001/07-10	Growing season	May to September	wet	weekly	Field, Chamber			/	/	/		/
75	Strack et al. 2006	Drainage	Water table manipulation	1.2	0	0	Canada	46.667	-71.167	46°40′	71°10′W	/	/	/	Temperate	8	Shallow drainage	Peatland (fen)	ombrotrophic	hollow	seasonally	Sphagnum cuspidatum	Peat moss	/	/		/			/			/			/	2001/07-10	Growing season	May to September	wet	weekly	Field, Chamber			/	/	/		/
75	Strack et al. 2006	Drainage	Water table manipulation	1.2	0	0	Canada	46.667	-71.167	46°40′	71°10′W	/	/	/	Temperate	8	Shallow drainage	Peatland (fen)	ombrotrophic	hummock	seasonally	Sphagnum papillosum	Peat moss	/	/		/			/			/			/	2002/05-09	Growing season	May to September	dry	weekly	Field, Chamber			/	/	/		/
75	Strack et al. 2006	Drainage	Water table manipulation	1.2	0	0	Canada	46.667	-71.167	46°40′	71°10′W	/	/	/	Temperate	8	Shallow drainage	Peatland (fen)	ombrotrophic	lawn	seasonally	Polytrichum strictum	Peat moss	/	/		/			/			/			/	2002/05-09	Growing season	May to September	dry	weekly	Field, Chamber			/	/	/		/
75	Strack et al. 2006	Drainage	Water table manipulation	1.2	0	0	Canada	46.667	-71.167	46°40′	71°10′W	/	/	/	Temperate	8	Shallow drainage	Peatland (fen)	ombrotrophic	hollow	seasonally	Sphagnum cuspidatum	Peat moss	/	/		/			/			/			/	2002/05-09	Growing season	May to September	dry	weekly	Field, Chamber			/	/	/		/
76	Urbanová et al. 2013a	Drainage	Forestry	/	0	0	Czech Republic	48.976	13.459	48°58′34″	13°27′34″	1200	3.2	1300	Temperate	50	Shallow drainage	Peatland (bog)	ombrotrophic	lawn	seasonally	Trichophorum cespitosum	Cyperaceae	/	/		/			/			/			/	2009/05/01-10/01	Growing season	May to September	/	weekly	Field, Chamber			/	/	/		/
76	Urbanová et al. 2013a	Drainage	Forestry	/	0	0	Czech Republic	48.976	13.459	48°58′34″	13°27′34″	1200	3.2	1300	Temperate	50	Shallow drainage	Peatland (bog)	ombrotrophic	hummock	seasonally	Andromeda polifolia	Shrub	/	/		/			/			/			/	2009/05/01-10/01	Growing season	May to September	/	weekly	Field, Chamber			/	/	/		/
76	Urbanová et al. 2013a	Drainage	Forestry	/	0	0	Czech Republic	48.976	13.459	48°58′34″	13°27′34″	1200	3.2	1300	Temperate	50	Deep drainage	Peatland (bog)	ombrotrophic	hummock	seasonally	Andromeda polifolia	Shrub	/	/		/			/			/			/	2009/05/01-10/01	Growing season	May to September	/	weekly	Field, Chamber			/	/	/		/
76	Urbanová et al. 2013a	Drainage	Forestry	/	0	0	Czech Republic	48.976	13.459	48°58′34″	13°27′34″	1200	3.2	1300	Temperate	50	Shallow drainage	Peatland (bog)	ombrotrophic	lawn	seasonally	Trichophorum cespitosum	Cyperaceae	/	/		/			/			/			/	2010/05/01-10/01	Growing season	May to September	/	weekly	Field, Chamber			/	/	/		/
76	Urbanová et al. 2013a	Drainage	Forestry	/	0	0	Czech Republic	48.976	13.459	48°58′34″	13°27′34″	1200	3.2	1300	Temperate	50	Shallow drainage	Peatland (bog)	ombrotrophic	hummock	seasonally	Andromeda polifolia	Shrub	/	/		/			/			/			/	2010/05/01-10/01	Growing season	May to September	/	weekly	Field, Chamber			/	/	/		/
76	Urbanová et al. 2013a	Drainage	Forestry	/	0	0	Czech Republic	48.976	13.459	48°58′34″	13°27′34″	1200	3.2	1300	Temperate	50	Deep drainage	Peatland (bog)	ombrotrophic	hummock	seasonally	Andromeda polifolia	Shrub	/	/		/			/			/			/	2010/05/01-10/01	Growing season	May to September	/	weekly	Field, Chamber			/	/	/		/
77	Dowrick et al. 2006	Drainage	Water table manipulation	2	0	0	UK	52.467	-3.75	52°28′	3°45′W	/	/	/	Temperate	0.0833333	Shallow drainage	Peatland (bog)	ombrotrophic	overall	seasonally	Sphagnum and Juncus communities	Peat moss	/	/		/			/			/			/	2005	Annual		/	weekly	Field, Chamber			/	/	/		/
78	Roulet and Moore, 1995	Drainage	Forestry	/	0	0	Canada	49.05	-80.667	49°03′	80°40′W	/	0.6	885	Boreal	7	Shallow drainage	Peatland (fen)	minerotrophic	overall	seasonally	Forest	Forest	/	/	0-10	6.3			/			/			/	1991/05-10	Growing season	May to October	/	biweekly	Field, Chamber			/	/	/		/
78	Roulet and Moore, 1995	Drainage	Forestry	/	0	0	Canada	49.05	-80.667	49°03′	80°40′W	/	0.6	885	Boreal	7	Deep drainage	Peatland (bog)	ombrotrophic	overall	seasonally	Forest	Forest	/	/	0-10	4.6			/			/			/	1991/05-10	Growing season	May to October	/	biweekly	Field, Chamber			/	/	/		/
78	Roulet and Moore, 1995	Drainage	Forestry	/	0	0	Canada	49.05	-80.667	49°03′	80°40′W	/	0.6	885	Boreal	7	Shallow drainage	Peatland (bog)	ombrotrophic	overall	seasonally	Forest	Forest	/	/	0-10	4.5			/			/			/	1991/05-10	Growing season	May to October	/	biweekly	Field, Chamber			/	/	/		/
79	Cao et al. 2017	Low drainage	Grassland	5.15	0	0	China	32.8	102.55	32°48′	102°33′	3500	0.9	744	Temperate	0.333333	/	Peatland (fen)	minerotrophic	overall	seasonally	Scirpus pumilus, Blysmus sinocompressus, Carex muliensis, Kobresia humilis	Cyperaceae	/	/	0-10	6.7	g kg-1	0-10	350	g kg-1	0-10	15		0-10	23.3333	2013/01-12	Annual		/	monthly	Field, Chamber	g kg-1	0-10	350	29.9345	6		/
79	Cao et al. 2017	High drainage	Grassland	5.15	0	0	China	32.8	102.55	32°48′	102°33′	3500	0.9	744	Temperate	0.333333	/	Peatland (fen)	minerotrophic	overall	seasonally	Scirpus pumilus, Blysmus sinocompressus, Carex muliensis, Kobresia humilis	Cyperaceae	/	/	0-10	6.7	g kg-1	0-10	350	g kg-1	0-10	15		0-10	23.3333	2013/01-12	Annual		/	monthly	Field, Chamber	g kg-1	0-10	350	29.9345	6		/
79	Cao et al. 2017	Low drainage	Grassland	5.15	0	0	China	32.8	102.55	32°48′	102°33′	3500	0.9	744	Temperate	1.5	/	Peatland (fen)	minerotrophic	overall	seasonally	Scirpus pumilus, Blysmus sinocompressus, Carex muliensis, Kobresia humilis	Cyperaceae	/	/	0-10	6.7	g kg-1	0-10	350	g kg-1	0-10	15		0-10	23.3333	2014/01-12	Annual		/	monthly	Field, Chamber	g kg-1	0-10	350	29.9345	6		/
79	Cao et al. 2017	High drainage	Grassland	5.15	0	0	China	32.8	102.55	32°48′	102°33′	3500	0.9	744	Temperate	1.5	/	Peatland (fen)	minerotrophic	overall	seasonally	Scirpus pumilus, Blysmus sinocompressus, Carex muliensis, Kobresia humilis	Cyperaceae	/	/	0-10	6.7	g kg-1	0-10	350	g kg-1	0-10	15		0-10	23.3333	2014/01-12	Annual		/	monthly	Field, Chamber	g kg-1	0-10	350	29.9345	6		/
79	Cao et al. 2017	Low drainage	Grassland	5.15	0	0	China	32.8	102.55	32°48′	102°33′	3500	0.9	744	Temperate	2.5	/	Peatland (fen)	minerotrophic	overall	seasonally	Scirpus pumilus, Blysmus sinocompressus, Carex muliensis, Kobresia humilis	Cyperaceae	/	/	0-10	6.7	g kg-1	0-10	350	g kg-1	0-10	15		0-10	23.3333	2015/01-12	Annual		/	monthly	Field, Chamber	g kg-1	0-10	350	29.9345	6		/
79	Cao et al. 2017	High drainage	Grassland	5.15	0	0	China	32.8	102.55	32°48′	102°33′	3500	0.9	744	Temperate	2.5	/	Peatland (fen)	minerotrophic	overall	seasonally	Scirpus pumilus, Blysmus sinocompressus, Carex muliensis, Kobresia humilis	Cyperaceae	/	/	0-10	6.7	g kg-1	0-10	350	g kg-1	0-10	15		0-10	23.3333	2015/01-12	Annual		/	monthly	Field, Chamber	g kg-1	0-10	350	29.9345	6		/
79	Cao et al. 2017	Low drainage	Grassland	5.15	0	0	China	32.8	102.55	32°48′	102°33′	3500	0.9	744	Temperate	3.5	/	Peatland (fen)	minerotrophic	overall	seasonally	Scirpus pumilus, Blysmus sinocompressus, Carex muliensis, Kobresia humilis	Cyperaceae	/	/	0-10	6.7	g kg-1	0-10	350	g kg-1	0-10	15		0-10	23.3333	2016/01-12	Annual		/	monthly	Field, Chamber	g kg-1	0-10	350	29.9345	6		/
79	Cao et al. 2017	High drainage	Grassland	5.15	0	0	China	32.8	102.55	32°48′	102°33′	3500	0.9	744	Temperate	3.5	/	Peatland (fen)	minerotrophic	overall	seasonally	Scirpus pumilus, Blysmus sinocompressus, Carex muliensis, Kobresia humilis	Cyperaceae	/	/	0-10	6.7	g kg-1	0-10	350	g kg-1	0-10	15		0-10	23.3333	2016/01-12	Annual		/	monthly	Field, Chamber	g kg-1	0-10	350	29.9345	6		/
79	Cao et al. 2017	Low drainage	Grassland	5.15	0	0	China	32.8	102.55	32°48′	102°33′	3500	0.9	744	Temperate	0.333333	Shallow drainage	Peatland (fen)	minerotrophic	overall	seasonally	Scirpus pumilus, Blysmus sinocompressus, Carex muliensis, Kobresia humilis	Cyperaceae	/	/	0-10	6.7	g kg-1	0-10	350	g kg-1	0-10	15		0-10	23.3333	2013/05-09	Growing season	May to September	/	monthly	Field, Chamber	g kg-1	0-10	350	29.9345	6		/
79	Cao et al. 2017	High drainage	Grassland	5.15	0	0	China	32.8	102.55	32°48′	102°33′	3500	0.9	744	Temperate	0.333333	Shallow drainage	Peatland (fen)	minerotrophic	overall	seasonally	Scirpus pumilus, Blysmus sinocompressus, Carex muliensis, Kobresia humilis	Cyperaceae	/	/	0-10	6.7	g kg-1	0-10	350	g kg-1	0-10	15		0-10	23.3333	2013/05-09	Growing season	May to September	/	monthly	Field, Chamber	g kg-1	0-10	350	29.9345	6		/
79	Cao et al. 2017	Low drainage	Grassland	5.15	0	0	China	32.8	102.55	32°48′	102°33′	3500	0.9	744	Temperate	1.5	Shallow drainage	Peatland (fen)	minerotrophic	overall	seasonally	Scirpus pumilus, Blysmus sinocompressus, Carex muliensis, Kobresia humilis	Cyperaceae	/	/	0-10	6.7	g kg-1	0-10	350	g kg-1	0-10	15		0-10	23.3333	2013/05-09	Growing season	May to September	/	monthly	Field, Chamber	g kg-1	0-10	350	29.9345	6		/
79	Cao et al. 2017	High drainage	Grassland	5.15	0	0	China	32.8	102.55	32°48′	102°33′	3500	0.9	744	Temperate	1.5	Shallow drainage	Peatland (fen)	minerotrophic	overall	seasonally	Scirpus pumilus, Blysmus sinocompressus, Carex muliensis, Kobresia humilis	Cyperaceae	/	/	0-10	6.7	g kg-1	0-10	350	g kg-1	0-10	15		0-10	23.3333	2013/05-09	Growing season	May to September	/	monthly	Field, Chamber	g kg-1	0-10	350	29.9345	6		/
79	Cao et al. 2017	Low drainage	Grassland	5.15	0	0	China	32.8	102.55	32°48′	102°33′	3500	0.9	744	Temperate	2.5	Shallow drainage	Peatland (fen)	minerotrophic	overall	seasonally	Scirpus pumilus, Blysmus sinocompressus, Carex muliensis, Kobresia humilis	Cyperaceae	/	/	0-10	6.7	g kg-1	0-10	350	g kg-1	0-10	15		0-10	23.3333	2013/05-09	Growing season	May to September	/	monthly	Field, Chamber	g kg-1	0-10	350	29.9345	6		/
79	Cao et al. 2017	High drainage	Grassland	5.15	0	0	China	32.8	102.55	32°48′	102°33′	3500	0.9	744	Temperate	2.5	Shallow drainage	Peatland (fen)	minerotrophic	overall	seasonally	Scirpus pumilus, Blysmus sinocompressus, Carex muliensis, Kobresia humilis	Cyperaceae	/	/	0-10	6.7	g kg-1	0-10	350	g kg-1	0-10	15		0-10	23.3333	2013/05-09	Growing season	May to September	/	monthly	Field, Chamber	g kg-1	0-10	350	29.9345	6		/
79	Cao et al. 2017	Low drainage	Grassland	5.15	0	0	China	32.8	102.55	32°48′	102°33′	3500	0.9	744	Temperate	3.5	Shallow drainage	Peatland (fen)	minerotrophic	overall	seasonally	Scirpus pumilus, Blysmus sinocompressus, Carex muliensis, Kobresia humilis	Cyperaceae	/	/	0-10	6.7	g kg-1	0-10	350	g kg-1	0-10	15		0-10	23.3333	2013/05-09	Growing season	May to September	/	monthly	Field, Chamber	g kg-1	0-10	350	29.9345	6		/
79	Cao et al. 2017	High drainage	Grassland	5.15	0	0	China	32.8	102.55	32°48′	102°33′	3500	0.9	744	Temperate	3.5	Shallow drainage	Peatland (fen)	minerotrophic	overall	seasonally	Scirpus pumilus, Blysmus sinocompressus, Carex muliensis, Kobresia humilis	Cyperaceae	/	/	0-10	6.7	g kg-1	0-10	350	g kg-1	0-10	15		0-10	23.3333	2013/05-09	Growing season	May to September	/	monthly	Field, Chamber	g kg-1	0-10	350	29.9345	6		/
79	Cao et al. 2017	Low drainage	Grassland	5.15	0	0	China	32.8	102.55	32°48′	102°33′	3500	0.9	744	Temperate	0.333333	/	Peatland (fen)	minerotrophic	overall	seasonally	Scirpus pumilus, Blysmus sinocompressus, Carex muliensis, Kobresia humilis	Cyperaceae	/	/	0-10	6.7	g kg-1	0-10	350	g kg-1	0-10	15		0-10	23.3333	2013/01-04, 10-12	Non-growing season	October 2013 to April 2014	/	monthly	Field, Chamber	g kg-1	0-10	350	29.9345	6		/
79	Cao et al. 2017	High drainage	Grassland	5.15	0	0	China	32.8	102.55	32°48′	102°33′	3500	0.9	744	Temperate	0.333333	/	Peatland (fen)	minerotrophic	overall	seasonally	Scirpus pumilus, Blysmus sinocompressus, Carex muliensis, Kobresia humilis	Cyperaceae	/	/	0-10	6.7	g kg-1	0-10	350	g kg-1	0-10	15		0-10	23.3333	2013/01-04, 10-12	Non-growing season	October 2013 to April 2014	/	monthly	Field, Chamber	g kg-1	0-10	350	29.9345	6		/
79	Cao et al. 2017	Low drainage	Grassland	5.15	0	0	China	32.8	102.55	32°48′	102°33′	3500	0.9	744	Temperate	1.5	/	Peatland (fen)	minerotrophic	overall	seasonally	Scirpus pumilus, Blysmus sinocompressus, Carex muliensis, Kobresia humilis	Cyperaceae	/	/	0-10	6.7	g kg-1	0-10	350	g kg-1	0-10	15		0-10	23.3333	2013/01-04, 10-12	Non-growing season	October 2013 to April 2014	/	monthly	Field, Chamber	g kg-1	0-10	350	29.9345	6		/
79	Cao et al. 2017	High drainage	Grassland	5.15	0	0	China	32.8	102.55	32°48′	102°33′	3500	0.9	744	Temperate	1.5	/	Peatland (fen)	minerotrophic	overall	seasonally	Scirpus pumilus, Blysmus sinocompressus, Carex muliensis, Kobresia humilis	Cyperaceae	/	/	0-10	6.7	g kg-1	0-10	350	g kg-1	0-10	15		0-10	23.3333	2013/01-04, 10-12	Non-growing season	October 2013 to April 2014	/	monthly	Field, Chamber	g kg-1	0-10	350	29.9345	6		/
79	Cao et al. 2017	Low drainage	Grassland	5.15	0	0	China	32.8	102.55	32°48′	102°33′	3500	0.9	744	Temperate	2.5	/	Peatland (fen)	minerotrophic	overall	seasonally	Scirpus pumilus, Blysmus sinocompressus, Carex muliensis, Kobresia humilis	Cyperaceae	/	/	0-10	6.7	g kg-1	0-10	350	g kg-1	0-10	15		0-10	23.3333	2013/01-04, 10-12	Non-growing season	October 2013 to April 2014	/	monthly	Field, Chamber	g kg-1	0-10	350	29.9345	6		/
79	Cao et al. 2017	High drainage	Grassland	5.15	0	0	China	32.8	102.55	32°48′	102°33′	3500	0.9	744	Temperate	2.5	/	Peatland (fen)	minerotrophic	overall	seasonally	Scirpus pumilus, Blysmus sinocompressus, Carex muliensis, Kobresia humilis	Cyperaceae	/	/	0-10	6.7	g kg-1	0-10	350	g kg-1	0-10	15		0-10	23.3333	2013/01-04, 10-12	Non-growing season	October 2013 to April 2014	/	monthly	Field, Chamber	g kg-1	0-10	350	29.9345	6		/
79	Cao et al. 2017	Low drainage	Grassland	5.15	0	0	China	32.8	102.55	32°48′	102°33′	3500	0.9	744	Temperate	3.5	/	Peatland (fen)	minerotrophic	overall	seasonally	Scirpus pumilus, Blysmus sinocompressus, Carex muliensis, Kobresia humilis	Cyperaceae	/	/	0-10	6.7	g kg-1	0-10	350	g kg-1	0-10	15		0-10	23.3333	2013/01-04, 10-12	Non-growing season	October 2013 to April 2014	/	monthly	Field, Chamber	g kg-1	0-10	350	29.9345	6		/
79	Cao et al. 2017	High drainage	Grassland	5.15	0	0	China	32.8	102.55	32°48′	102°33′	3500	0.9	744	Temperate	3.5	/	Peatland (fen)	minerotrophic	overall	seasonally	Scirpus pumilus, Blysmus sinocompressus, Carex muliensis, Kobresia humilis	Cyperaceae	/	/	0-10	6.7	g kg-1	0-10	350	g kg-1	0-10	15		0-10	23.3333	2013/01-04, 10-12	Non-growing season	October 2013 to April 2014	/	monthly	Field, Chamber	g kg-1	0-10	350	29.9345	6		/
80	Moore and Knowles, 1990	Drainage	Forestry	1.6	0	0	Canada	45.533	-73.133	45°32′	73°08′W	/	/	/	Temperate	/	/	Swamp	/	overall	seasonally	Populus deltoides	Forest	/	/	0-10	7.2			/			/			/	1986-1987	Annual		/	weekly	Field, Chamber			/	/	/		/
81	Alm et al. 1999	Drainage	Forestry	2	0	0	Finland	62.817	30.983	62°49′	30°59′	148	2	600	Boreal	20	Shallow drainage	Peatland (bog)	ombrotrophic	overall	seasonally	Sphagnum fuscum	Peat moss	/	/	0-20	4.3			/	g kg-1	0-20	14			/	1994/11-1995/10	Annual		/	monthly	Field, Chamber			/	/	/		/
81	Alm et al. 1999	Drainage	Forestry	2.3	0	0	Finland	61.8	24.317	61°48′	24°19′	150	2	600	Boreal	30	Shallow drainage	Peatland (bog)	ombrotrophic	hummock	seasonally	Sphagnum fuscum	Peat moss	/	/	0-20	3.8			/	g kg-1	0-20	5			/	1994/11-1995/10	Annual		/	monthly	Field, Chamber			/	/	/		/
81	Alm et al. 1999	Drainage	Forestry	1.6	0	0	Finland	61.8	24.317	61°48′	24°19′	150	2	600	Boreal	20	Shallow drainage	Peatland (fen)	minerotrophic	overall	seasonally	Carex rostrata, Carex Iimosa	Cyperaceae	/	/	0-20	5.6			/	g kg-1	0-20	19			/	1994/11-1995/10	Annual		/	monthly	Field, Chamber			/	/	/		/
82	Arai et al. 2014b	Drainage	Forestry	4.35	0	0	Indonesia	-2.35	114.033	2°21′S	114°02′	/	/	/	Tropical	/	/	Swamp	/	overall	/	Deciduous forest	Forest	Histosol	/	0-10	3.6	g kg-1	0-10	540	g kg-1	0-10	13.3		0-10	40.6015	2010/07-2011/03	Annual		/	monthly	Field, Chamber	g kg-1	0-10	540	17.3205	3	0.032075	494
83	Dowrick et al. 1999	Drainage	Water table manipulation	2	0	0	UK	52.467	-3.75	52°28′	3°45′W	/	/	/	Temperate	0.0833333	/	Peatland (bog)	ombrotrophic	overall	seasonally	Sphagnum and Juncus communities	Peat moss	/	/	0-5	4.7			/			/			/	1994/05-09	Growing season	May to September	/	weekly	Field, Chamber			/	/	/		/
84	Wang et al. 2009	Drainage	Grassland	0.5	0	0	China	34.73	92.892	34°43'49" N	92°53'30"	4778	-5.5	269.7	Temperate	/	/	Marsh	minerotrophic	overall	seasonally	Stipa capillata	Graminoid	/	/	0-10	6.17712	g kg-1	0-10	82.0295	g kg-1	0-10	9.24925		0-10	8.86878	2006	Annual		/	Weekly to biweekly	Field, Chamber	g kg-1	0-10	82.0295	6.64207	4	0.0809717	71.4022
84	Wang et al. 2009	Drainage	Grassland	0.5	0	0	China	34.73	92.892	34°43'49" N	92°53'30"	4778	-5.5	269.7	Temperate	/	/	Marsh	minerotrophic	overall	seasonally	Stipa capillata	Graminoid	/	/	0-10	6.17712	g kg-1	0-10	82.0295	g kg-1	0-10	9.24925		0-10	8.86878	2006	Annual		/	Weekly to biweekly	Field, Chamber	g kg-1	0-10	82.0295	6.64207	4	0.0809717	63.7638
85	Kittler et al. 2017	Drainage	Water table manipulation	0.2	0	0	Russia	68.75	161.33	68.75°	161.33°	/	-10.2	160	Boreal	13	/	Peatland (fen)	minerotrophic	overall	seasonally	Carex appendiculata	Cyperaceae	/	/		/			/			/			/	2013	Annual		/	Half-hourly to daily	Eddy covariance			/	/	/		/
85	Kittler et al. 2017	Drainage	Water table manipulation	0.2	0	0	Russia	68.75	161.33	68.75°	161.33°	/	-10.2	160	Boreal	14	/	Peatland (fen)	minerotrophic	overall	seasonally	Carex appendiculata	Cyperaceae	/	/		/			/			/			/	2014	Annual		/	Half-hourly to daily	Eddy covariance			/	/	/		/
85	Kittler et al. 2017	Drainage	Water table manipulation	0.2	0	0	Russia	68.75	161.33	68.75°	161.33°	/	-10.2	160	Boreal	15	/	Peatland (fen)	minerotrophic	overall	seasonally	Carex appendiculata	Cyperaceae	/	/		/			/			/			/	2015	Annual		/	Half-hourly to daily	Eddy covariance			/	/	/		/
85	Kittler et al. 2017	Drainage	Water table manipulation	0.2	0	0	Russia	68.75	161.33	68.75°	161.33°	/	-10.2	160	Boreal	16	/	Peatland (fen)	minerotrophic	overall	seasonally	Carex appendiculata	Cyperaceae	/	/		/			/			/			/	2016	Annual		/	Half-hourly to daily	Eddy covariance			/	/	/		/
86	Merbold et al.2009	Drainage	Water table manipulation	/	0	0	Russia	69.6	161.341	69°36′47″, 16112002900E	161°20′29″	/	-11	237	Boreal	1	Shallow drainage	Peatland (fen)	minerotrophic	overall	permanently	Carex appendiculata, Eriophorum angustifolium	Cyperaceae	/	/		/			/			/			/	2005/07/16-10/31	Growing season	May to September	/	Half-hourly to daily	Eddy covariance			/	/	/		/
87	Kittler et al. 2016	Drainage	Water table manipulation	/	0	0	Russia	69.6	161.341	68.61	161.34	/	-10	172	Boreal	10	/	Peatland (fen)	minerotrophic	overall	permanently	Carex appendiculata, Eriophorum angustifolium	Cyperaceae	/	/		/			/			/			/	2013/05-10	Growing season	May to October	/	Half-hourly to daily	Eddy covariance			/	/	/		/
87	Kittler et al. 2016	Drainage	Water table manipulation	/	0	0	Russia	69.6	161.341	68.61	161.34	/	-10	172	Boreal	11	/	Peatland (fen)	minerotrophic	overall	permanently	Carex appendiculata, Eriophorum angustifolium	Cyperaceae	/	/		/			/			/			/	2014/05-10	Growing season	May to October	/	Half-hourly to daily	Eddy covariance			/	/	/		/
87	Kittler et al. 2016	Drainage	Water table manipulation	/	0	0	Russia	69.6	161.341	68.61	161.34	/	-10	172	Boreal	12	/	Peatland (fen)	minerotrophic	overall	permanently	Carex appendiculata, Eriophorum angustifolium	Cyperaceae	/	/		/			/			/			/	2015/05-10	Growing season	May to October	/	Half-hourly to daily	Eddy covariance			/	/	/		/
88	Kwon et al. 2016	Drainage	Water table manipulation	/	0	0	Russia	68.613	162.341	68°36′47″	161°20′29″	/	-11	197	Boreal	10	/	Peatland (fen)	minerotrophic	overall	permanently	Carex appendiculata	Cyperaceae	/	/		/			/			/			/	2013/07/22-08/10	Growing season	June to September	/	weekly	Field, Chamber			/	/	/		/
88	Kwon et al. 2016	Drainage	Water table manipulation	/	0	0	Russia	68.613	162.341	68°36′47″	161°20′29″	/	-11	197	Boreal	10	/	Peatland (fen)	minerotrophic	overall	permanently	Eriophorum angustifolium	shrub	/	/		/			/			/			/	2013/07/22-08/10	Growing season	June to September	/	weekly	Field, Chamber			/	/	/		/
88	Kwon et al. 2016	Drainage	Water table manipulation	/	0	0	Russia	68.613	162.341	68°36′47″	161°20′29″	/	-11	197	Boreal	10	/	Peatland (fen)	minerotrophic	overall	permanently	Shrub	shrub	/	/		/			/			/			/	2013/07/22-08/10	Growing season	June to September	/	weekly	Field, Chamber			/	/	/		/
88	Kwon et al. 2016	Drainage	Water table manipulation	/	0	0	Russia	68.613	162.341	68°36′47″	161°20′29″	/	-11	197	Boreal	10	/	Peatland (fen)	minerotrophic	overall	permanently	Shrub	shrub	/	/		/			/			/			/	2014/06/16-08/20	Growing season	June to September	wet	weekly	Field, Chamber			/	/	/		/
88	Kwon et al. 2016	Drainage	Water table manipulation	/	0	0	Russia	68.613	162.341	68°36′47″	161°20′29″	/	-11	197	Boreal	10	/	Peatland (fen)	minerotrophic	overall	permanently	Carex appendiculata	Cyperaceae	/	/		/			/			/			/	2014/06/16-08/20	Growing season	June to September	dry	weekly	Field, Chamber			/	/	/		/
89	Inubushi et al. 1998	Drainage	Agriculture	2	0	0	Malaysia	2.817	111.9	2°49′	111°54′	/	/	/	Tropical	/	/	Swamp	/	overall	/	Forest	Forest	/	Clay		/			/			/			/	1992/08-1994/08	Annual		/	monthly	Field, Chamber			/	/	/		/
90	Takakai et al. 2006	Drainage	Grassland	4.175	0	0	Indonesia	-2.35	114.033	2°21′S	114°02′	/	25.3	2339	Tropical	/	/	Swamp	/	overall	/	Forest	Forest	/	Clay	0-5	5.2	g kg-1	0-5	578	g kg-1	0-10	16.5		0-5	35.0303	2002/04-2003/04	Annual		/	monthly	Field, Chamber	g kg-1	0-5	578	49.4347	3		556
90	Takakai et al. 2006	Drainage	Grassland	4.175	0	0	Indonesia	-2.35	114.033	2°21′S	114°02′	/	25.6	1994	Tropical	/	/	Swamp	/	overall	/	Forest	Forest	/	Clay	0-5	5.2	g kg-1	0-5	578	g kg-1	0-10	16.5		0-5	35.0303	2003/04-2004/04	Annual		/	monthly	Field, Chamber	g kg-1	0-5	578	49.4347	3		556
91	Chivers et al. 2009	Drainage	Water table manipulation	1	0	0	USA	64.82	-147.87	64.820°	147.87° W	/	-2.9	269	Boreal	0.166667	Shallow drainage	Peatland (fen)	minerotrophic	overall	seasonally	Moss and Sphagnum	Peat moss	/	/	0-20	5.3	g kg-1	0-20	410			/			/	2005/07/20-09/01	Growing season	June to September	wet	weekly	Field, Chamber	g kg-1	0-20	410	35.0661	3
91	Chivers et al. 2009	Drainage	Water table manipulation	1	0	0	USA	64.82	-147.87	64.82°	147.87° W	/	-2.9	269	Boreal	1.16667	Shallow drainage	Peatland (fen)	minerotrophic	overall	seasonally	Moss and Sphagnum	Peat moss	/	/	0-20	5.3	g kg-1	0-20	410			/			/	2006/06/29-09/10	Growing season	June to September	dry	weekly	Field, Chamber	g kg-1	0-20	410	35.0661
92	Cooper et al. 2020	Drainage	Forestry	1.89	0	0	Malaysia	3.9	103.333	3.9	103.333	/	28.5	2000	Tropical	0.5	Shallow drainage	Swamp	ombrotrophic	overall	seasonally	Macaranga pruinosa, Campnospermacoriaceum	Forest	/	/	0-10	3.6	g kg-1	0-10	551.624	g kg-1	0-10	12.75		0-10	43.2646	2014-2015	Annual		/	weekly	Field, Chamber	g kg-1	0-10	551.624	12.8405	5	0.0232777	536.543
93	Strack et al. 2009	Drainage	Water table manipulation	5.5	0	0	Canada	49.233	-68.467	49°14′	68°28′W	/	/	1014.4	Temperate	1.5	Deep drainage	Peatland (bog)	ombrotrophic	overall	seasonally	Sphagnum rubellum	Peat moss	/	/		/			/			/			/	2005/05/26-08/24	Growing season	May to September	/	weekly	Field, Chamber			/	/	/		/
94	Urbanová et al. 2012	Drainage	Forestry	/	0	0	Czech Republic	48.976	13.457	48°58′34″	13°27′24″	1200	3.2	1200	Temperate	50	Shallow drainage	Peatland (bog)	ombrotrophic	overall	seasonally	Trichophorum cespitosum, Andromeda polifolia	Cyperaceae	/	/	0-30	4.2	g kg-1	0-30	479	g kg-1	0-30	18.6		0-30	25.7527	2009/05/20-10/01	Growing season	May to September	/	daily	Field, Chamber	g kg-1	0-30	479	15	5	0.0313152	484
94	Urbanová et al. 2012	Drainage	Forestry	/	0	0	Czech Republic	49.155	13.369	49°09′19″	13°22′08″	900	4	1000	Temperate	50	Shallow drainage	Peatland (fen)	ombrotrophic	overall	seasonally	Sphagnum flexuosum, Carex rostrata	Peat moss	/	/	0-30	5.7	g kg-1	0-30	434	g kg-1	0-30	17.2		0-30	25.2326	2009/05/20-10/01	Growing season	May to September	/	daily	Field, Chamber	g kg-1	0-30	434	2	5	0.00460829	328
95	Ratcliffe et al. 2019	Drainage	Agriculture	/	0	0	New Zealand	-37.388	175.554	-37.388	175.554	/	14.7	1269	Temperate	85	Deep drainage	Peatland (bog)	/	overall	seasonally	Empodisma robustum	Forest	/	/		/	/		/			/			/	2015/05/01-2016/04/30	Annual		dry	Half-hourly to daily	Eddy covariance			/	/	/		/
95	Ratcliffe et al. 2019	Drainage	Agriculture	/	0	0	New Zealand	-37.388	175.554	-37.388	175.554	/	14.7	1269	Temperate	86	Deep drainage	Peatland (bog)	/	overall	seasonally	Empodisma robustum	Forest	/	/		/	/		/			/			/	2016/05/01-2017/04/30	Annual		wet	Half-hourly to daily	Eddy covariance			/	/	/		/
96	Salm et al. 2009	Drainage	Forestry	/	0	0	Estonia	52.4185	8.45806	52.4185	8.45806	/	/	/	Temperate	/	/	Peatland (fen)	minerotrophic	overall	seasonally	/	/	/	/		/	/		/			/			/	/	Annual		/	/	/	/	/	/	/	/		/
96	Salm et al. 2009	Drainage	Forestry	/	0	0	Estonia	52.4185	8.45806	52.4185	8.45806	/	/	/	Temperate	/	/	Peatland (fen)	minerotrophic	overall	seasonally	/	/	/	/		/	/		/			/			/	/	Annual		/	/	/	/	/	/	/	/		/
96	Salm et al. 2009	Drainage	Forestry	/	0	0	Estonia	52.4185	8.45806	52.4185	8.45806	/	/	/	Temperate	/	/	Peatland (fen)	minerotrophic	overall	seasonally	/	Forest	/	/		/	/		/			/			/	/	Annual		/	/	/	/	/	/	/	/		/
96	Salm et al. 2009	Drainage	Forestry	/	0	0	Estonia	52.4185	8.45806	52.4185	8.45806	/	/	/	Temperate	/	/	Peatland (fen)	minerotrophic	overall	seasonally	/	Forest	/	/		/	/		/			/			/	/	Annual		/	/	/	/	/	/	/	/		/
96	Salm et al. 2009	Drainage	Forestry	/	0	0	Estonia	52.4185	8.45806	52.4185	8.45806	/	/	/	Temperate	/	/	Peatland (bog)	ombrotrophic	overall	seasonally	/	/	/	/		/	/		/			/			/	/	Annual		/	/	/	/	/	/	/	/		/
96	Salm et al. 2009	Drainage	Forestry	/	0	0	Estonia	52.4185	8.45806	52.4185	8.45806	/	/	/	Temperate	/	/	Peatland (bog)	ombrotrophic	overall	seasonally	/	Forest	/	/		/	/		/			/			/	/	Annual		/	/	/	/	/	/	/	/		/
97	Paul et al. 2018	Drainage	Agriculture (N)	0.6	140	0	Ireland	53.417	-8	53°25′	8°00′ W	/	/	/	Temperate	/	/	Peatland (bog)	minerotrophic	overall	seasonally	/	/	Peat soil	/		/	/		/			/			/	/	Annual		/	/	Field, Chamber			/	/	/		/
97	Paul et al. 2018	Drainage	Agriculture (N)	0.6	25	0	Ireland	53.417	-8	53°25′	8°00′ W	/	/	/	Temperate	/	/	Peatland (bog)	minerotrophic	overall	seasonally	/	/	Peat soil	/		/	/		/			/			/	/	Annual		/	/	Field, Chamber			/	/	/		/
97	Paul et al. 2018	Drainage	Agriculture (N)	0.6	25	0	Ireland	53.417	-8	53°25′	8°00′ W	/	/	/	Temperate	/	/	Peatland (bog)	minerotrophic	overall	seasonally	/	/	Peat soil	/		/	/		/			/			/	/	Annual		/	/	Field, Chamber			/	/	/		/
97	Paul et al. 2018	Drainage	Agriculture (N)	0.6	25	0	Ireland	53.417	-8	53°25′	8°00′ W	/	/	/	Temperate	/	/	Peatland (bog)	minerotrophic	overall	seasonally	/	/	Peat soil	/		/	/		/			/			/	/	Annual		/	/	Field, Chamber			/	/	/		/
97	Paul et al. 2018	Drainage	Agriculture (N)	0.6	25	0	Ireland	53.417	-8	53°25′	8°00′ W	/	/	/	Temperate	/	/	Peatland (bog)	minerotrophic	overall	seasonally	/	/	Peat soil	/		/	/		/			/			/	/	Annual		/	/	Field, Chamber			/	/	/		/
97	Paul et al. 2018	Drainage	Agriculture (N)	0.6	25	0	Ireland	53.417	-8	53°25′	8°00′ W	/	/	/	Temperate	/	/	Peatland (bog)	minerotrophic	overall	seasonally	/	/	Peat soil	/		/	/		/			/			/	/	Annual		/	/	Field, Chamber			/	/	/		/
98	Beetz et al. 2013	Drainage	Grassland (N)	5.15	118	2.3	Germany	53.683	8.817	53°41′	8°49′	/	10.2	916	Temperate	57	Deep drainage	Peatland (bog)	minerotrophic	overall	seasonally	Eriophorum angustifolium, Sphagnum fallax	Cyperaceae	Peat soil	/	0-15	3.05	/		/			/			/	2007/07/01-2008/06/30	Annual		dry	biweekly	Field, Chamber			/	/	/		/
98	Beetz et al. 2013	Drainage	Grassland (N)	5.15	121	2.1	Germany	53.683	8.817	53°41′	8°49′	/	10.8	929	Temperate	57	Deep drainage	Peatland (bog)	minerotrophic	overall	seasonally	Eriophorum angustifolium, Sphagnum fallax	Cyperaceae	Peat soil	/	0-15	3.05	/		/			/			/	2008/07/01-2009/06/30	Annual		wet	biweekly	Field, Chamber			/	/	/		/
99	Nykanen et al. 1995	Drainage	Grassland (N)	6.5	80	0	Finland	62.667	30.833	62°40′	30°50′	/	1.9	791.028	Boreal	60	/	Peatland (fen)	minerotrophic	overall	seasonally	Molinia-Carex-Tri- chophorum caespitosum-Sphagnum papillosum	Cyperaceae	Peat soil	/	0-10	5.3	g kg-1	0-10	490	g kg-1	0-10	26		0-10	18.8462	1991	Annual		wet	biweekly	Field, Chamber	g kg-1	0-10	490	41.9083	/		/
99	Nykanen et al. 1995	Drainage	Grassland (N)	6.5	80	0	Finland	62.667	30.833	62°40′	30°50′	/	1.9	753.675	Boreal	61	/	Peatland (fen)	minerotrophic	overall	seasonally	Molinia-Carex-Tri- chophorum caespitosum-Sphagnum papillosum	Cyperaceae	Peat soil	/	0-10	5.3	g kg-1	0-10	490	g kg-1	0-10	26		0-10	18.8462	1992	Annual		wet	biweekly	Field, Chamber	g kg-1	0-10	490	41.9083	/		/
100	Keating et al. 2016	Drainage	Agriculture (N)	/	225	0	USA	34.502	-90.424	34°30′08.48″	90°25′26.82″W	/	/	/	Temperate	/	/	/	minerotrophic	overall	/	Limnobium spongia, Polygonum persicaria	Forbs	/	Clay		/			/			/			/	2013/06-08	Growing season	May to September	/	weekly	Field, Chamber			/	/	/		/
101	Jiang et al. 2009	Drainage	Agriculture (N)	/	40	0	China	47.583	133.517	47°35′	133°31′	56	2.3	431.6	Temperate	60	/	Marsh	minerotrophic	overall	seasonally	Deyeuxia angustifolia	Shrub	/	Clay	0-10	5.68	g kg-1	0-10	128.1	g kg-1	0-10	9.37		0-10	13.6713	2006	Annual		/	weekly	Field, Chamber	g kg-1	0-10	128.1	24.2	3	0.188915	26.55
101	Jiang et al. 2009	Drainage	Agriculture (N)	/	72	0	China	47.583	133.517	47°35′	133°31′	56	2.3	431.6	Temperate	60	/	Marsh	minerotrophic	overall	seasonally	Deyeuxia angustifolia	Shrub	/	Clay	0-10	5.68	g kg-1	0-10	128.1	g kg-1	0-10	9.37		0-10	13.6713	2006	Annual		/	weekly	Field, Chamber	g kg-1	0-10	128.1	24.2	3	0.188915	34.99
102	Melling et al. 2007	Drainage	Agriculture (N)	4.8	103	0	Malaysia	2.817	111.85	2°49′	111°51′	/	27.4	2163	Tropical	5	Shallow drainage	Swamp	minerotrophic	overall	seasonally	Forest	Forest	/	/	0-25	3.6	g kg-1	0-25	478.1	g kg-1	0-25	17.7		0-25	27.0113	2002/08-2003/07	Annual		/	monthly	Field, Chamber	g kg-1	0-25	478.1	15.0688	3	0.0315182	446.9
102	Melling et al. 2007	Drainage	Agriculture	4.8	0	0	Malaysia	2.817	111.85	2°49′	111°51′	/	27.4	2163	Tropical	5	Shallow drainage	Swamp	ombrotrophic	overall	seasonally	Forest	Forest	/	/	0-25	3.6	g kg-1	0-25	478.1	g kg-1	0-25	17.7		0-25	27.0113	2002/08-2003/07	Annual		/	monthly	Field, Chamber	g kg-1	0-25	478.1	15.0688	3	0.0315182	445.9
103	Kandel et al. 2018	Drainage	Grassland	4	135	0	Denmark	57.23	9.84	57.23°	9.84°	/	9.3	925	Temperate	94	/	Peatland (bog)	minerotrophic	overall	seasonally	Eriophorum vaginatum, Empetrum nigrum	Cyperaceae	Peat soil	/	0-25	3.4	g kg-1	0-25	410	g kg-1	0-25	13		0-25	31.5385	2014/06/10-2015/06/09	Annual		/	weekly to bioweekly	Field, Chamber	g kg-1	0-25	410	20	2	0.0487805	340
103	Kandel et al. 2018	Drainage	Agriculture (N)	4	112	25	Denmark	57.23	9.84	57.23°	9.84°	/	9.3	925	Temperate	94	/	Peatland (bog)	minerotrophic	overall	seasonally	Eriophorum vaginatum, Empetrum nigrum	Cyperaceae	Peat soil	/	0-25	3.4	g kg-1	0-25	410	g kg-1	0-25	13		0-25	31.5385	2014/06/10-2015/06/09	Annual		/	weekly to bioweekly	Field, Chamber	g kg-1	0-25	410	20	2	0.0487805	320
103	Kandel et al. 2018	Drainage	Agriculture (N)	4	126	0	Denmark	57.23	9.84	57.23°	9.84°	/	9.3	925	Temperate	94	Shallow drainage	Peatland (bog)	minerotrophic	overall	seasonally	Eriophorum vaginatum, Empetrum nigrum	Cyperaceae	Peat soil	/	0-25	3.4	g kg-1	0-25	410	g kg-1	0-25	13		0-25	31.5385	2014/06/10-2015/06/09	Annual		/	weekly to bioweekly	Field, Chamber	g kg-1	0-25	410	20	2	0.0487805	330
104	Mustamo et al. 2016	Drainage	Agriculture (N)	1.75	125	0	Finland	71.53	47.02	71.53°	47.02°	/	/	/	Boreal	81	Deep drainage	Peatland (bog)	minerotrophic	overall	seasonally	Sphagnum mosses	Peat moss	/	/	0-15	4.1	g kg-1	0-15	574.246	g kg-1	0-15	4.7		0-15	122.18	2011/06-10	Growing season	June to September	/	weekly	Field, Chamber	g kg-1	0-15	574.246	49.1136	10		237.819
105	Cooper et al. 2020	Drainage	Agriculture (N)	1.89	250	0	Malaysia	3.9	103.333	3.9	103.333	/	28.5	2000	Tropical	0.5	Deep drainage	Swamp	minerotrophic	overall	seasonally	Macaranga pruinosa, Campnospermacoriaceum	Forest	/	/	0-10	3.6	g kg-1	0-10	551.624	g kg-1	0-10	12.75		0-10	43.2646	2014-2015	Annual		/	weekly	Field, Chamber	g kg-1	0-10	551.624	12.8405	5	0.0232777	528.422
105	Cooper et al. 2020	Drainage	Agriculture (N)	1.89	200	0	Malaysia	3.9	103.333	3.9	103.333	/	28.5	2000	Tropical	12.5	Shallow drainage	Swamp	minerotrophic	overall	seasonally	Macaranga pruinosa, Campnospermacoriaceum	Forest	/	/	0-10	3.6	g kg-1	0-10	551.624	g kg-1	0-10	12.75		0-10	43.2646	2014-2015	Annual		/	weekly	Field, Chamber	g kg-1	0-10	551.624	12.8405	5	0.0232777	471.578
106	Gyimah et al. 2020	Drainage	Grassland	/	0	0	Canada	48.26	-58.67	48° 15.842′N	58° 39.913′ W	/	5	892.1	Boreal	35	Shallow drainage	Peatland (bog)	ombrotrophic	overall	permanently	S. capillifolium, S. warnstorfii	Peat moss	/	/		/			/			/			/	2016/05-09	Growing season	May to September	/	weekly	Field, Chamber			/	/	/		/
107	Hommeltenberg et al. 2014	Drainage	Forestry	5	0	0	Germany	47.81	11.45	47° 48′34″N	11° 27′11″E	598	7.6	1209	Temperate	43	Shallow drainage	Peatland (bog)	ombrotrophic	overall	seasonally	Pinus mugo ssp. rotundata Link	Forest	/	/	0-10	3.9	g kg-1	0-10	498	g kg-1	0-10	13		0-10	38.3077	2010/06-2011/06	Annual		/	daily	Eddy covariance	g kg-1	0-10	498	42.5925	3		502
107	Hommeltenberg et al. 2014	Drainage	Forestry	5	0	0	Germany	47.8	11.33	47° 48′23″N	11° 19′39″E	590	9.6	1092	Temperate	44	Shallow drainage	Peatland (bog)	ombrotrophic	overall	seasonally	Pinus mugo ssp. rotundata Link	Forest	/	/	0-10	3.9	g kg-1	0-10	498	g kg-1	0-10	13		0-10	38.3077	2011/07-2012/06	Annual		/	daily	Eddy covariance	g kg-1	0-10	498	42.5925	3		502
108	Mezbahuddin et al. 2014	Drainage	Forestry	2.5	0	0	Indonesia	-2.32	113.9	2.32° S	113.90°	/	26.1	2561	Tropical	8	Deep drainage	Swamp	ombrotrophic	overall	seasonally	Combretocarpus rotundatus, Cratoxylum arborescens, Buchanania sessifolia, and Tetramerista glabra	Forest	/	/		/			/			/			/	2002	Annual		/	daily	Eddy covariance			/	/	/		/
108	Mezbahuddin et al. 2014	Drainage	Forestry	2.5	0	0	Indonesia	-2.32	113.9	2.32° S	113.90°	/	25.9	2510	Tropical	9	Deep drainage	Swamp	ombrotrophic	overall	seasonally	Combretocarpus rotundatus, Cratoxylum arborescens, Buchanania sessifolia, and Tetramerista glabra	Forest	/	/		/			/			/			/	2003	Annual		/	daily	Eddy covariance			/	/	/		/
108	Mezbahuddin et al. 2014	Drainage	Forestry	2.5	0	0	Indonesia	-2.32	113.9	2.32° S	113.90°	/	26	2360	Tropical	10	Deep drainage	Swamp	ombrotrophic	overall	seasonally	Combretocarpus rotundatus, Cratoxylum arborescens, Buchanania sessifolia, and Tetramerista glabra	Forest	/	/		/			/			/			/	2004	Annual		/	daily	Eddy covariance			/	/	/		/
108	Mezbahuddin et al. 2014	Drainage	Forestry	2.5	0	0	Indonesia	-2.32	113.9	2.32° S	113.90°	/	26	2442	Tropical	11	Deep drainage	Swamp	ombrotrophic	overall	seasonally	Combretocarpus rotundatus, Cratoxylum arborescens, Buchanania sessifolia, and Tetramerista glabra	Forest	/	/		/			/			/			/	2005	Annual		/	daily	Eddy covariance			/	/	/		/
114	Planas-Clarke et al. 2020	Drainage	Grassland	4	0	0	Peru	9.689	-77.238	9° 41′21.8″S	77° 14′18.40″W	4200	13.8	632	Subtropical	13	Deep drainage	Peatland (bog)	/	overall	seasonally	Calamagrostis spp.	Graminoid	/	/		/			/			/			/	2015/06/01-2016/12/01	Annual		/	monthly	Field, Chamber			/	/	/		/
114	Planas-Clarke et al. 2020	Drainage	Grassland	4	0	0	Peru	9.689	-77.238	9° 41′21.8″S	77° 14′18.40″W	4200	13.8	632	Subtropical	13	Deep drainage	Peatland (bog)	/	overall	seasonally	Calamagrostis spp.	Graminoid	/	/		/			/			/			/	2015/06/01-2016/12/01	Annual		/	monthly	Field, Chamber			/	/	/		/
110	Xhuan Wong et al. 2020	Drainage	Forestry	10	0	0	Malaysia	1.383	111.4	1°23′	111°24′	10	27.1	2346	Tropical	14	Shallow drainage	Swamp	ombrotrophic	overall	seasonally	Shorea albida.	Forest	/	/		/			/			/			/	2014	Annual		/	daily	Eddy covariance			/	/	/		/
110	Xhuan Wong et al. 2020	Drainage	Forestry	10	0	0	Malaysia	1.383	111.4	1°23′	111°24′	10	27.4	2833	Tropical	15	Shallow drainage	Swamp	ombrotrophic	overall	seasonally	Shorea albida.	Forest	/	/		/			/			/			/	2015	Annual		/	daily	Eddy covariance			/	/	/		/
110	Xhuan Wong et al. 2020	Drainage	Forestry	10	0	0	Malaysia	1.383	111.4	1°23′	111°24′	10	27.2	2503	Tropical	16	Shallow drainage	Swamp	ombrotrophic	overall	seasonally	Shorea albida.	Forest	/	/		/			/			/			/	2016	Annual		/	daily	Eddy covariance			/	/	/		/
110	Xhuan Wong et al. 2020	Drainage	Agriculture	10	0	0	Malaysia	2.183	111.833	2°11′	111°50′	10	27.1	2346	Tropical	10	Deep drainage	Swamp	ombrotrophic	overall	seasonally	Shorea albida.	Forest	/	/		/			/			/			/	2014	Annual		/	daily	Eddy covariance			/	/	/		/
110	Xhuan Wong et al. 2020	Drainage	Agriculture	10	0	0	Malaysia	2.183	111.833	2°11′	111°50′	10	27.4	2833	Tropical	11	Deep drainage	Swamp	ombrotrophic	overall	seasonally	Shorea albida.	Forest	/	/		/			/			/			/	2015	Annual		/	daily	Eddy covariance			/	/	/		/
110	Xhuan Wong et al. 2020	Drainage	Agriculture	10	0	0	Malaysia	2.183	111.833	2°11′	111°50′	10	27.2	2503	Tropical	12	Deep drainage	Swamp	ombrotrophic	overall	seasonally	Shorea albida.	Forest	/	/		/			/			/			/	2016	Annual		/	daily	Eddy covariance			/	/	/		/
111	Rocha and Goulden, 2010	Drainage	Water table manipulation		0	0	USA	37.201	-122.026	37°12′2.001″N	122°1′34.899″W	/			Temperate	2		Marsh		overall	Permanently	Juncus balticus, Distichlis spicata, and Sarcocornia pacifica	Graminoid	/	/		/			/			/			/	2004	Annual		/	Half-hourly to daily	Eddy covariance			/	/	/		/
111	Rocha and Goulden, 2010	Drainage	Water table manipulation		0	0	USA	37.201	-122.026	37°12′2.001″N	122°1′34.899″W	/			Temperate	3		Marsh		overall	Permanently	Juncus balticus, Distichlis spicata, and Sarcocornia pacifica	Graminoid	/	/		/			/			/			/	2005	Annual		/	Half-hourly to daily	Eddy covariance			/	/	/		/
111	Rocha and Goulden, 2010	Drainage	Water table manipulation		0	0	USA	37.201	-122.026	37°12′2.001″N	122°1′34.899″W	/			Temperate	2		Marsh		overall	Permanently	Juncus balticus, Distichlis spicata, and Sarcocornia pacifica	Graminoid	/	/		/			/			/			/	2006	Annual		/	Half-hourly to daily	Eddy covariance			/	/	/		/
111	Rocha and Goulden, 2010	Drainage	Water table manipulation		0	0	USA	37.201	-122.026	37°12′2.001″N	122°1′34.899″W	/			Temperate	3		Marsh		overall	Permanently	Juncus balticus, Distichlis spicata, and Sarcocornia pacifica	Graminoid	/	/		/			/			/			/	2007	Annual		/	Half-hourly to daily	Eddy covariance			/	/	/		/
111	Rocha and Goulden, 2010	Drainage	Water table manipulation		0	0	USA	37.201	-122.026	37°12′2.001″N	122°1′34.899″W	/			Temperate	2		Marsh		overall	Permanently	Juncus balticus, Distichlis spicata, and Sarcocornia pacifica	Graminoid	/	/		/			/			/			/	2008	Annual		/	Half-hourly to daily	Eddy covariance			/	/	/		/
111	Rocha and Goulden, 2010	Drainage	Water table manipulation		0	0	USA	37.201	-122.026	37°12′2.001″N	122°1′34.899″W	/			Temperate	3		Marsh		overall	Permanently	Juncus balticus, Distichlis spicata, and Sarcocornia pacifica	Graminoid	/	/		/			/			/			/	2009	Annual		/	Half-hourly to daily	Eddy covariance			/	/	/		/
112	Valde´s-Barrera et al. 2019	Drainage	Peat extraction		0	0	Chile	-41.867	-73.667	41°52′S	73°40′W	/		2250	Temperate	40		Peatland (fen)	minerotrophic	overall	seasonally	Sphagnum moss	Peat moss	/	/		/			/			/			/	2015/10-2016/10	Annual		/	Half-hourly to daily	Eddy covariance			/	/	/		/
113	Yang et al. 2013	Drainage	Agriculture		0	0	China	37.764	118.99	37°45′50″ N	118°59′24″ E	/	12.5	580	Temperate			Marsh		overall	seasonally	Phragmites australis, Suaeda salsa, Tamarix chinensis, Imperata cylindrical var. major	Graminoid	/	/		/			/			/			/	2011	Annual		/	Half-hourly to daily	Eddy covariance			/	/	/		/
115	Deshmukh et al. 2021	Drainage	Agriculture	9	0	0	Indonesia	0.3952	102.764			/	26.6	2020	Tropical	19		Swamp	minerotrophic	overall	seasonally	Shorea uliginosa, Calophyllum ferrugineum and Syzygium	Forest	/	/		/	g kg-1	0-50	502	g kg-1	0-50	13			38.6154	2017/06-2018/05	Annual		/	Half-hourly to daily	Eddy covariance			502	20	5	0.0398406	554
115	Deshmukh et al. 2021	Drainage	Agriculture	9	0	0	Indonesia	0.3952	102.764			/	26.9	1756	Tropical	20		Swamp	minerotrophic	overall	seasonally	Shorea uliginosa, Calophyllum ferrugineum and Syzygium	Forest	/	/		/	g kg-1	0-50	502	g kg-1	0-50	13			38.6154	2018/06-2019/05	Annual		/	Half-hourly to daily	Eddy covariance			502	20	5	0.0398406	554
115	Deshmukh et al. 2021	Drainage	Agriculture	9	0	0	Indonesia	0.3952	102.764			/	27	1496	Tropical	21		Swamp	minerotrophic	overall	seasonally	Shorea uliginosa, Calophyllum ferrugineum and Syzygium	Forest	/	/		/	g kg-1	0-50	502	g kg-1	0-50	13			38.6154	2019/06-2020/05	Annual		/	Half-hourly to daily	Eddy covariance			502	20	5	0.0398406	554
																																																0.0855271
[truncated: 556 more columns]

## Sheet: Annual flux from Data_in-situ
	Annual total fluxes in the drained and control wetland
	GPP						Re						NEE						CH4						N2O						WTD
	Control			Drained			Control			Drained			Control			Drained			Control			Drained			Control			Drained			Control			Drained
	kg ha-1 yr-1						kg ha-1 yr-1						kg ha-1 yr-1						kg ha-1 yr-1						kg ha-1 yr-1						cm
	Mean	SD	n	Mean	SD	n	Mean	SD	n	Mean	SD	n	Mean	SD	n	Mean	SD	n	Mean	SD	n	Mean	SD	n	Mean	SD	n	Mean	SD	n	Mean	SD	n	Mean	SD	n
Overall	-40736.3	9264.57	6	-30951.1	7720.48	6	23661.8	8127.26	6	17959.9	6049.92	6	-2080	200	4	-720	580	4	155.93	91.89	3	-0.52095	0.420619	3	0.0932169	0.205535	3	1.16346	0.389226	3	11.41	3.12165	4	-91.8	9.7	4
	-29498.7	5661.68	6	-23758.3	4117.59	6	24809.1	6528.42	6	21625.2	4944.44	6	-2080	200	4	-1200	800	4	155.93	91.89	3	-0.5015	0.69632	3	0.0932169	0.205535	3	1.61772	0.538782	3	5.655	3.80894	4	-105	8.1	4
	-9117.23	2424.32	3	-4187.61	3018.54	3	12663.5	2211.91	3	8364.46	6024.83	3	-17074.5	1832.4	6	-12991.2	15856.4	6	155.93	91.89	3	-0.613	0.526	3	0.109127	0.239511	3	1.87111	1.14387	3	-31.375	10.768	4	-57.38	9.45	4
	-9117.23	2424.32	3	-11061.6	1546.86	3	12663.5	2211.91	3	13557.8	1534.78	3	-4689.64	822.558	6	-2133.05	2649.35	6	155.93	91.89	3	-0.35	0.701	3	0.109127	0.239511	3	0.267302	0.160211	3	-6.17	1.6	3	-32.34	1.06	3
	-10940.7	3587.52	3	-1303.69	1460.7	3	12157	3352.78	3	7583.16	4282.3	3	8950.33	4633.11	6	19004.3	11808.6	6	155.93	91.89	3	-0.964	0.263	3	0.109127	0.239511	3	1.63054	0.966164	3	-6.17	1.6	3	-37.89	1.4	3
	-10940.7	3587.52	3	-13155.4	4763.14	3	12157	3352.78	3	16131.5	7799.71	3	3546.29	5941.72	3	4176.85	748.674	3	155.93	91.89	3	0.35	1.927	3	0.109127	0.239511	3	2.11168	0.984942	3	-20.33	2.57	3	-32.34	1.06	3
	-11180.6	6822.77	3	-2014.79	1143.15	3	12213.3	5829.31	3	13236.1	2169.8	3	3546.29	5941.72	3	2496.18	441.866	3	77.6798	41.1094	3	1.31787	0.996826	3	0.3	0.35	6	3	0.95	6	-20.33	2.57	3	-37.89	1.4	3
	-11180.6	6822.77	3	-13708.5	4128.05	3	12213.3	5829.31	3	16774.9	6880.91	3	1216.3	2060.91	3	6279.48	947.481	3	77.6798	41.1094	3	-1.09987	0.821474	3	-0.101835	0.063291	3	2.96318	0.679484	3	-6.17	1.6	3	-40	0	3
	-7247.13	2100.96	3	-4029.58	3302.44	3	6440.29	2181.35	3	16039.5	7252.72	3	1216.3	2060.91	3	2976.06	692.554	3	80.9305	80.9275	3	-0.14922	1.92423	3	0.028689	0.0472675	3	0.803	0.225132	3	-6.17	1.6	3	-14.4755	3.48287	3
	-7247.13	2100.96	3	-4582.66	1206.66	3	6440.29	2181.35	3	24633.8	2489.53	3	1032.65	1588.59	3	11221.3	1545.63	3	80.9305	80.9275	3	2.50126	2.38319	3	-0.0146	0.088257	3	0.007884	0.0498225	3	-6.17	1.6	3	-40	0	3
	-7369.27	746.959	3	-3516.01	4890.16	3	11939.3	4483.71	3	16131.5	7799.71	3	1032.65	1588.59	3	3066.4	896.277	3	80.9305	80.9275	3	-2.9015	2.23862	3	0.07373	0.0350765	3	0.0802635	0.028397	3	-6.17	1.6	3	-31.7101	5.4726	3
	-7369.27	746.959	3	-4661.67	1270.17	3	11939.3	4483.71	3	23301	3584.45	3	-806.838	461.405	3	12010	2892.38	3	80.9305	80.9275	3	1.14015	0.605658	3	0.123163	1.53286	3	0.374147	1.1113	3	-20.33	2.57	3	-40	0	3
	-7939.27	2111.97	3	-3674.03	3492.97	3	12286.1	4228.11	3	22335.9	5098	3	-806.838	461.405	3	20051.1	2691.2	3	1212.3	324.686	9	4.80305	10.1006	9	0.0157143	0.0903568	3	1.02143	1.52514	3	-20.33	2.57	3	-14.4755	3.48287	3
	-7939.27	2111.97	3	-4859.2	1397.19	3	12286.1	2603.85	3	23071.2	3447.71	3	4570.03	2072.51	3	12615.5	3401.87	3	2106.5	550.27	12	-0.369466	0.858462	12	0.0235714	0.135535	3	2.12143	3.16759	3	-20.33	2.57	3	-40	0	3
	-8294.39	1642.47	3	-4116.49	2228.17	3	9925.3	1567.01	3	11818.2	4651.05	3	4570.03	2072.51	3	18639.3	3134.05	3	382.1	116.458	9	31.0351	65.3585	9	0.0235714	0.135535	3	0.801429	1.19664	3	-20.33	2.57	3	-31.7101	5.4726	3
	-8294.39	1642.47	3	-7951.71	991.199	3	9925.3	1567.01	3	18874.3	1436.98	3	4346.82	1600.24	3	18661.8	3804.37	3	60.9422	16.4004	12	31.0351	65.3585	12	0.0157143	0.0903568	3	0.0172857	0.02581	3	-15.3	3.2	6	-47.7	6.2	6
	-9369.26	2035.72	3	-2299.23	2342.63	3	12061.2	2723.47	3	11429.9	4226.87	3	4346.82	1600.24	3	18212	4028.23	3	76.5986	97.385	3	1.28814	5.04394	3	0.0188571	0.108428	3	0.0204286	0.0305027	3	-9	1.9	3	-34.51	4.08	3
	-9369.26	2035.72	3	-9078.41	2550.77	3	12061.2	2723.47	3	19572.8	4405.7	3	1587.38	3333.55	3	7701.75	1365.15	3	76.5986	97.385	3	-0.990878	2.11119	3	0.0125714	0.0722854	3	0.0141429	0.0211173	3	-38	7.6	3	-73	10.3	3
	-9754.42	3932.13	3	-2761.45	1692.92	3	12245.3	3757.31	3	17331	2585.94	3	1456.79	3333.55	3	10922.6	1312.05	3	3.31045	3.22256	3	0.972568	5.00563	3	0.0125714	0.0722854	3	0.0141429	0.0211173	3	-38	7.6	3	-112	15.2	3
	-9754.42	3932.13	3	-9460.83	2248.91	3	12245.3	3459.62	3	19797.1	3942.24	3	2691.94	1470.9	3	9130.66	1617.11	3	3.31045	3.22256	3	-0.748129	2.05654	3	-0.0963265	0.0540294	3	1.54547	0.289318	3	-47	6.8	3	-82	12.3	3
	-9117.23	2424.32	3	-11061.6	12004.4	3	12663.5	2011.76	3	13557.8	1534.78	3	2691.94	1470.9	3	10494.4	1546.85	3	69.1892	105.74	3	0.20126	3.76732	3	-0.404403	1.16002	24	0.414401	1.31789	15	-47	6.8	3	-120	11.8	3
	-10940.7	3587.52	3	-13155.4	5176.94	3	12157	3352.78	3	16499.1	2145.49	3	2490.89	1134.54	3	14569.5	1911.41	3	69.1892	105.74	3	3.60831	8.77628	3	0.0227857	0.131017	3	2.10571	3.14412	3	-56	10.1	3	-91	11.3	3
	-7247.13	2100.96	3	-4582.66	1321.56	3	6440.29	2181.35	3	24633.8	2489.53	3	2490.89	1134.54	3	10336.3	1988.93	3	69.1892	105.74	3	-2.34325	2.17251	3	0.0919286	0.528587	3	0.870571	1.29988	3	-56	10.1	3	-128	14.2	3
	-7369.27	746.959	3	-4661.67	1389.64	3	11939.3	4483.71	3	23301	3584.45	3	3546.29	5941.72	3	2496.18	441.866	3	69.1892	105.74	3	1.96948	4.47045	3	0.0534286	0.307213	3	0.0579857	0.0865808	3	-38	7.6	3	-73	10.3	3
	-8294.39	1642.47	3	-8210.87	6747.56	3	9925.3	1480	3	18431.2	1392.33	3	1216.3	2060.91	3	3343.73	717.823	3	3.35183	3.21266	3	0.157107	2.94067	3	0.240429	1.38246	3	0.883143	1.31866	3	-38	7.6	3	-112	15.2	3
	-9369.26	2035.72	3	-9418.16	2962.86	3	12061.2	2723.47	3	19491.9	1982.67	3	-806.838	1429.05	3	20051.1	2691.2	3	3.35183	3.21266	3	2.81671	12.1107	3	0.0191714	0.110235	3	0.0306429	0.0457541	3	-44	6.8	3	-79	12.3	3
	-30804.4	7508.69	48	-23917.1	4465.22	48	25786.5	7450.75	48	19674.2	4051.36	48	4570.03	7489.89	3	18639.3	3134.05	3	3.35183	3.21266	3	-1.82918	1.6562	3	0.0477714	0.274685	3	0.216857	0.323798	3	-44	6.8	3	-116	11.8	3
	-30804.4	7508.69	48	-22424.6	7078.09	48	25786.5	7450.75	48	34101.6	6764.05	48	1630.91	3386.26	3	10220.4	1209.71	3	3.35183	3.21266	3	1.53741	3.47621	3	0.0545286	0.313538	3	0.0358286	0.0534971	3	-50	6.8	3	-85	12.3	3
	-39843.5	12909.5	66	-35035.8	6481.98	66	35408.6	12878.7	66	26888.1	6047.87	66	2691.94	3491.8	3	10073.8	1436.38	3	155.371	42.7092	6	185.222	44.6467	6	0.0847	0.487023	3	0.0616	0.0919774	3	-50	6.8	3	-120	11.8	3
	-39843.5	12909.5	66	-47094.8	13325.7	66	35408.6	12878.7	66	52464.1	12723.4	66	-5017.91	931.026	48	-4242.87	1877.41	48	12.1217	3.29588	6	18.3903	4.91263	6	1.81938	10.4614	3	1.43821	2.14745	3	-38	5.41257	3	-73	7.31953	3
	-16584.2	3505.6	57	-18655.5	9333.84	57	12315.9	3346.19	57	12460.3	2060.22	57	-5017.91	931.026	48	11677	2084.92	48	88	60.4722	6	-2	5.96285	6	1.10722	6.36652	3	6.6686	9.95714	3	-38	5.41257	3	-112	10.7566	3
	-16584.2	3505.6	57	-16893.3	9325.42	57	12315.9	3346.19	57	11148.6	2042.05	57	-4434.92	891.261	66	-8147.64	2332.23	66	172	22	6	-1.5	0.6	6	0.53232	3.06082	3	2.10397	3.14153	3	-45.68	4.84282	3	-80.65	8.74079	3
	-17120.4	4174.14	1	-14041.4	5227.16	1	12896.2	3709.29	1	14385.7	3774.67	1	-4434.92	891.261	66	5369.32	3960.99	66	218.59	226.197	25	-1.37308	0.504914	75	0.584802	3.3626	3	2.82505	4.2182	3	-45.68	4.84282	3	-118.08	8.35053	3
	-15725.8	3834.11	1	-16611.2	6183.85	1	12587.5	3620.51	1	17012.8	4464	1	-4268.27	1045.12	57	-6195.25	9103.63	57	5.38669	4.26802	3	3.99806	4.35031	3	0.0722617	0.415503	3	1.56147	2.3315	3	-53.36	6.39862	3	-88.3	8.32241	3
	-17643	3122.52	3	-18545.3	1220.59	3	12121	2737.69	3	14804.6	2182.17	3	-4268.27	1045.12	57	-5744.72	9099.1	57	5.38669	4.26802	3	2.69388	4.34476	3	1.068	6.14097	3	1.97459	2.94833	3	-53.36	6.39862	3	-124.16	9.30615	3
	-16723.6	2362.8	3	-16792.7	2297.57	3	10565.6	3177.88	3	13251	2768.3	3	2000	5999.31	3	-6800	6481.37	3	4.92557	6.48384	3	4.36152	5.03476	3	0.352375	2.02615	3	2.90729	4.34099	3	-38	7.6	3	-73	10.3	3
	-13221.3	5835.69	3	-13858	8055.43	3	9278.44	3665.3	3	8910.19	4926.31	3	2000	5999.31	3	-6800	6481.37	3	4.92557	6.48384	3	2.5656	2.16779	3	0.23227	1.33555	3	3.19393	4.76898	3	-38	7.6	3	-112	15.2	3
	-12433.2	4080.1	3	-12839.1	6079.75	3	8581.22	3466.47	3	7630.77	3659.78	3	2000	5999.31	3	-8000	7625.14	3	6.95868	1.15326	3	1.1759	1.45647	3	0.0727753	0.418456	3	1.91761	2.86326	3	-47	6.8	3	-82	12.3	3
	-129103	31476.7	1	-116380	43324.7	1	136437	39242.9	1	134603	35318.7	1	2000	5999.31	3	-8000	7625.14	3	6.95868	1.15326	3	1.09038	2.18227	3	0.31635	1.819	3	3.54269	5.28973	3	-47	6.8	3	-120	11.8	3
	-130313	31771.8	1	-121147	45099.2	1	132953	38241	1	128553	33731.3	1	2000	5999.31	3	-2000	1906.29	3	10.8663	5.33941	3	1.86941	2.12646	3	0.0216785	0.124651	3	1.41952	2.11955	3	-56	10.1	3	-91	11.3	3
	-120743	29438.5	1	-111613	41550.2	1	136987	39401.1	1	130093	34135.3	1	2000	5999.31	3	-1999	1905.33	3	10.8663	5.33941	3	1.22478	3.4038	3	0.0628234	0.361233	3	2.46823	3.68541	3	-56	10.1	3	-128	14.2	3
	-128773	31396.3	1	-118947	44280.2	1	127783	36754	1	122870	32240	1	-55	450	6	-910	180	2	9.95273	3.61094	3	1.45577	2.25239	3	2.00132	11.5076	3	3.11612	4.6528	3	-38	7.6	3	-73	10.3	3
	-40673.4	10107.7	8	-44668.8	7435.52	8	25647	7128.47	8	30448.3	38699.4	8	-100	270	16	-910	180	2	9.95273	3.61094	3	1.00454	1.23918	3	2.05627	11.8235	3	3.95948	5.91205	3	-38	7.6	3	-112	15.2	3
	-2994.92	676.52	3	-2403.54	338.397	3	3969.45	723.087	3	4246.55	528.204	3	-77.5	262.393	16	1790	2340	4	10.2412	7.09379	3	0.961562	1.17811	3	0.144523	0.831006	3	2.27124	3.39127	3	-44	6.8	3	-79	12.3	3
	-3247.74	576.551	3	-2538.13	178.152	3	4869.5	764.579	3	4268.1	956.61	3	-77.5	262.393	16	1700	2340	3	10.2412	7.09379	3	0.456608	1.53139	3	0.251294	1.44493	3	2.71505	4.05395	3	-44	6.8	3	-116	11.8	3
	-4239.56	1115.02	3	-3364.95	1102.25	3	7477.34	1843.72	3	5971.03	1963.46	3	-77.5	262.393	16	665	360	16	7.7977	3.35141	3	3.04017	2.57693	3	0.619759	0.319372	18	0.857605	1.85453	18	-50	6.8	3	-85	12.3	3
	-2945.16	96.3275	3	-2329.57	936.727	3	2386.83	98.5654	3	2420.49	226.676	3	25.2371	75.7027	3	227.91	217.23	3	7.7977	3.35141	3	1.98871	2.78814	3	0.619759	0.319372	18	1.25782	0.639591	18	-50	6.8	3	-120	11.8	3
	-2887.69	116.061	3	-2017.07	715.266	3	2301.58	97.8987	3	2420.49	564.274	3	826.516	2479.26	3	-2686.08	2560.22	3	7.13752	3.96335	3	3.05393	2.94879	3	0.32108	0.194946	18	1.09773	0.533871	18	-38	5.41257	3	-73	7.31953	3
	-2413.6	229.444	3	-1974.45	445.589	3	3307.46	917.365	3	2946	650.639	3	-870.681	2611.74	3	-911.638	868.922	3	7.13752	3.96335	3	1.81629	1.27456	3	0.32108	0.194946	18	0.697519	0.315144	18	-38	5.41257	3	-112	10.7566	3
	-1544.05	837.607	3	-1178.56	1103.81	3	821.957	860.953	3	1214.11	590.586	3	82.0207	246.034	3	-4541.91	4329.09	3	8.40299	3.18738	3	1.07945	0.9606	3	0.634693	0.128564	21	0.754692	0.358647	21	-45.68	4.84282	3	-80.65	8.74079	3
	-998.699	642.031	3	-1433.38	1186.71	3	688.15	827.81	3	910.581	867.05	3	-6476.66	2851.85	3	303.8	833.876	3	8.40299	3.18738	3	0.786169	1.35205	3	0.634693	0.128564	21	0.777562	0.424217	21	-45.68	4.84282	3	-118.08	8.35053	3
	-757.078	753.461	3	-1751.91	1655.7	3	764.611	794.728	3	1696.18	1486.73	3	-5712.15	3273.21	3	-61.3951	529.414	3	107.852	101.115	6	11.097	12.9128	6	0.2	0.519615	3	0.9	1.03923	3	-53.36	6.39862	3	-88.3	8.32241	3
	-3659.96	593.485	3	-2778.65	942.718	3	6251.17	266.977	3	7838.28	2291.05	3	-4224.28	12671.4	1	344.326	328.192	1	107.852	101.115	6	23.3722	23.1166	6	0.3	0.866025	3	0.7	0.866025	3	-53.36	6.39862	3	-124.16	9.30615	3
	-4810.23	507.91	3	-5079.11	317.388	3	4762.05	997.805	3	6143.13	1144.58	3	-3138.29	9413.79	1	401.537	382.722	1	345.6	358.4	4	-2.4	0.8	4	0.2	0.519615	3	0.6	0.519615	3	-38	7.6	3	-112	15.2	3
	-1686.2	951.524	3	-4019.34	183.636	3	2652.48	1183.12	3	3491.73	187.138	3	-2040	6119.3	3	5060	698.594	3	131.4	146.495	3	38.8	145.004	3	0.3	0.866025	3	0.4	0.69282	3	-47	6.8	3	-120	11.8	3
	-7900.04	1770.2	3	-3744.71	2032.4	3	12362.9	2275.27	3	15082.7	2876.42	3	-4180	12538.6	3	1540	1460.7	3	131.4	146.495	3	1.4	5.2321	3	0.2	0.519615	3	0.3	0.519615	3	-38	7.6	3	-112	15.2	3
	-10050.8	1612.55	3	-12603.4	2731.15	3	9984.97	333.566	3	15408.3	3231.81	3	-5500	16498.1	3	-5500	5242.29	3	131.4	146.495	3	3.6	13.454	3	0.3	0.866025	3	0.4	1.03923	3	-44	6.8	3	-116	11.8	3
	-3420.21	2581.35	3	-7240.46	1430.82	3	3050.27	3364.46	3	7768.13	631.537	3	-5500	16498.1	3	-5500	5242.29	3	256	285.409	3	-0.4	1.49489	3	1	1.58114	10	2	2.84605	10	-38	5.41257	3	-112	10.8251	3
	-5163.66	1258.95	3	-11281.8	4199.85	3	3223.08	927.045	3	10128.9	2657.72	3	-5522.05	3799.05	3	-3740.72	3396.35	3	580	646.63	3	0.533333	1.99318	3	1	1.58114	10	2	4.42719	10	-45.68	4.84282	3	-118.24	8.40372	3
	-6329	1543.08	3	-6508.75	2423	3	5111.97	1470.34	3	5566.42	1460.58	3	-6157.98	2847.63	3	-3541.64	2451.05	3	78.6667	87.7038	3	34.6667	129.557	3	1	1.58114	10	11	13.914	10	-4.5	2.76586	2	-18.45	8.95056	2
	-6329	1543.08	3	-4475.64	1666.14	3	5111.97	1470.34	3	5547.62	1455.65	3	-3942.85	3165.22	3	-4947.83	674.984	3	32	35.6761	3	14.6667	54.8125	3	1	1.58114	10	6	8.53815	10	-4.5	2.76586	2	-14.3	4.27931	2
	-6053.29	1475.86	3	-11865.7	4417.24	3	4090.62	1176.58	3	9751.57	2558.73	3	-3852.02	1523.88	3	-5208.29	1132.68	3	17.1	7.96743	3	11.1	4.33013	3	-0.0688286	0.395763	4	0.19272	0.287758	4	-9	3.66747	3	-15	3.40221	3
	-8439.78	2057.71	3	-8092.57	3012.61	3	5436.64	1563.73	3	7258.53	1904.57	3	-4000	11998.6	4	2600	2478.17	4	17.3	8.14064	3	12.5	5.02295	3	-0.0688286	0.395763	4	4.59775	6.86508	4	-9	3.66747	3	-21	4.7631	3
	-8439.78	2057.71	3	-6425.78	2392.12	3	5436.64	1563.73	3	7678.42	2014.75	3	-2700	8099.07	4	3900	3717.26	4	29.565	10.6773	3	7.99188	0.8736	3	0	1.71	7	3.42419	13.6968	44	-9	3.66747	3	-26	5.89717	3
	-252.976	61.6782	1	-259.329	96.5401	1	243.003	69.8942	1	278.682	73.1236	1	-2400	7199.18	4	4200	4003.2	4	142.076	118.227	24	1.34264	1.8695	15	0.43	0.86	17	3.42419	13.6968	44	-2.8	0.72	3	-23.33	3.46	3
	-270.833	66.032	1	-301.007	112.056	1	252.07	72.5022	1	294.164	77.186	1	-2700	8099.07	4	5300	5051.66	4	29.8775	10.5769	3	21.2484	3.45421	3	0.215	0.95704	17	12.8407	31.6737	14	-5.04	1.83	3	-37.3	7.39	3
	-241.071	58.7757	1	-271.678	101.137	1	217.614	62.5918	1	295.884	77.6374	1	-2850	8549.02	4	5150	4908.69	4	24.519	3.85853	3	2.714	1.82043	3	0.215	0.95704	17	17.1209	30.8177	5	-11.68	1.82	3	-20.88	1.28	3
	-1190.89	8.17281	4	-1647.11	42.2133	4	1173.65	59.3123	4	1113.34	77.0302	4	7663.33	22987.4	1	18223.3	17369.4	1	37.001	14.2297	3	17.569	3.32601	3	0.215	0.95704	17	0.856047	3.42419	7	-20.85	5.42	3	-21.08	7.29	3
	-1587.86	7.47228	4	-1598.67	44.3367	4	1001.9	31.5355	4	1031.87	95.9155	4	2640	7919.09	1	7406.67	7059.61	1	29.018	28.4589	3	44.106	9.75645	3	4.24286	2.98571	7	3.77143	1.72857	10	-26.8	10.9209	3	-62.1	14.0852	3
	-1541.16	7.23877	4	-2325.33	61.9656	4	1345.41	87.6958	4	1031.87	302.961	4	16243.3	48724.4	1	18480	17614.1	1	277.333	309.193	3	0.04	0.149489	3	4.24286	2.98571	7	7.85714	4.24286	8	-27.34	6.04	3	-42.07	2.04	3
	-2129.6	6.82564	4	-2860.46	83.0417	4	1355.54	118.505	4	1460.5	101.186	4	-990	2969.66	1	3923.33	3739.5	1	326.667	364.194	3	-0.106667	0.398636	3	4.24286	2.98571	7	1.88571	2.81563	1	-2.62	0.79	3	-21.88	3.76	3
	-2259.29	13.6513	4	-1940.01	56.0709	4	1857.59	103.363	4	1587.5	105.691	4	2799.24	1473.96	20	6964.24	2472.92	20	100.8	112.38	3	1.06667	3.98636	3	-0.6525	0.0930706	4	0.6623	0.0612651	4	-6.51	2.28	3	-46.73	5.78	3
	-27659.6	2920.59	3	-19692.3	1592.44	3	26436.6	3571.72	3	20646.2	1492.98	3	-15026.4	12368.6	8	-14220.6	39407.3	8	93.0667	103.758	3	0.133333	0.498296	3	-0.6525	0.0930706	4	0.1247	0.0414502	4	-10.75	1.853	3	-20.14	1.87	3
	-13417.4	2514	3	-10261.1	928.26	3	12328	1844.65	3	10779.5	1426.08	3	974.532	469.466	3	1843.01	320.759	3	24	26.7571	3	7.86667	29.3994	3	-0.6525	0.0930706	4	0.4203	0.0277308	4	-24.62	6.88	3	-23.22	6.41	3
	-17995	1848.15	3	-2054.55	2813.75	3	11579.7	6378.08	3	3447.39	3117.48	3	1621.76	1098.32	3	1729.97	370.594	3	24.1333	26.9058	3	8.4	31.3926	3	-0.3622	0.554237	4	-0.0285	0.0995691	4	-6.95	1.41	3	-21.5	1.76	3
	-5231.5	774.591	5	-7422.05	3514.83	5	4243.1	1520.75	5	7080.96	2727.09	5	3237.78	1588.21	3	2606.08	272.81	3	59.4667	66.2982	3	27.3333	102.151	3	-0.3622	0.554237	4	0.0821	0.0126396	4	-14.43	3.89	3	-28.3	4.55	3
	-7616.01	1856.86	5	-11234.3	2636.97	5	7943.33	2284.72	5	12092.3	4450.75	5	-558.335	748.746	3	90.9264	382.259	3	50.8	56.6359	3	28.1333	105.14	3	-0.3622	0.554237	4	0.3004	0.0231864	4	3.33333	1.52753	3	-18.1	5.6	3
	-31496.7	7679.22	1	-47703.3	17758.5	1	24456.7	7034.41	1	44476.7	11670.3	1	-586.112	363.92	3	403.429	463.613	3							2.10247	12.0892	4	6.80088	10.1547	4	6.52	6.22	4	-36.47	14.77	4
	-30323.3	7393.15	1	-45173.3	16816.6	1	22513.3	6475.45	1	43303.3	11362.4	1	893.864	1145.19	3	971.546	320.497	3							0.692443	3.98153	4	1.89002	2.82207	4	-5.83333	5.33854	4	-19.5	4.06202	4
	-7090	1524.2	3	-18490	3689.27	3	7020	1299.04	3	23060	2424.87	3	-722.094	355.554	3	35.5494	98.4044	3							0.692443	3.98153	4	1.20293	1.79615	4	-17.5	4.94975	4	-34	11.3137	4
	-6290	1316.36	3	-19210	3290.9	3	5020	917.987	3	24030	2459.51	3	-310.549	752.083	3	-522.801	196.666	3							0.692443	3.98153	4	1.54648	2.30911	4	-10	5.65685	4	-16.5	3.53553	4
	-13830.8	2274.67	3	-66220.4	9098.67	3	8766.07	227.467	3	41998.1	6824	3	7.53274	385.9	3	-55.7311	131.304	3							1.07574	6.1855	4	1.01035	1.5086	4	10	14.1421	4	-8	2.82843	4
	-32633.3	3600	3	-65926.7	5926	3	30690	3652	3	61160	6593	3	2591.21	1600.55	3	5059.64	1113.54	3							9.3513	53.7698	3	12.2658	18.3146	3	-27.34	6.04	3	-42.07	2.04	3
	-36630	4321	3	-75753.3	7859	3	33953.3	4126	3	64753.3	9463	3	-48.1792	1897.39	3	1064.02	385.191	3							10.4444	60.0552	3	19.2891	28.8013	3	-27.34	6.04	3	-42.07	2.04	3
	-131193	31986.3	1	-154037	57343.1	1	146923	42259.2	1	176367	46277.1	1	966.284	2670.81	3	-527.613	119.076	3							0.745258	0.238304	3	2.051	1.58487	3	-2.62	0.79	3	-21.88	3.76	3
	-138600	33792.1	1	-152680	56838	1	150003	43145.1	1	173837	45613.2	1	4462.89	2118.44	3	11338	1981.84	3							0	0	3	0.03	0.0447942	3	-6.51	2.28	3	-46.73	5.78	3
	-135483	33032.3	1	-150663	56087.3	1	139810	40213.2	1	166357	43650.5	1	-65.8217	2444.11	3	2804.95	528.035	3							0	0	3	0.05	0.074657	3	-10.75	1.853	3	-20.14	1.87	3
	-134383	32764.1	1	-148133	55145.5	1	136253	39190.2	1	161810	42457.5	1	-369.935	430.23	3	527.664	650.282	3							0.801429	0.190526	3	1.52429	0.353833	3	-24.62	6.88	3	-23.22	6.41	3
	-160161	10636.5	3	-207277	21272.6	3	67306.6	13632.7	3	144421	24745.8	3	-1940.58	5821.09	3	-1152.9	1098.88	3							0.801429	0.190526	3	1.46143	0.217744	3	-6.95	1.41	3	-21.5	1.76	3
	-160161	10636.5	3	-129453	6791.91	3	67306.6	13632.7	3	78968.1	7711.6	3	-1217.03	3650.68	3	-942.327	898.172	3							0.878429	0.161857	4	24.849	0.655286	4	-14.43	3.89	3	-28.3	4.55	3
	-51700	12605	1	-15510	5773.89	1	39196.7	11274	1	35236.7	9245.79	1	-1217.03	3650.68	3	1071.98	1021.75	3							-0.173934	1.66057	46	6.65171	10.9571	73	22	8.96492	3	-35	7.93849	3
	-52030	12685.5	1	-33366.7	12421.4	1	53753.3	15460.9	1	42936.7	11266.2	1	-1962.67	5887.33	3	-2114.15	2015.08	3							0.0429261	0.246824	46	38.026	56.7781	66	18	7.33494	3	-25	5.67035	3
	-51700	12605	1	-15510	5773.89	1	39196.7	11274	1	35236.7	9245.79	1	-3003.14	9008.39	3	-834.035	794.955	3							0.7	4.02498	3	0.8	1.19451	3	14	5.70495	3	-31	7.03124	3
	-52030	12685.5	1	-33366.7	12421.4	1	53753.3	15460.9	1	42936.7	11266.2	1	-3003.14	9008.39	3	1252.64	1193.95	3	214.332	127.053	18	74.8075	46.8441	18	0.593068	2.31254	34	4.49269	1.79388	12	8	3.25997	3	-30	6.80442	3
	-51700	12605	1	-15510	5773.89	1	39196.7	11274	1	35236.7	9245.79	1	-1484.7	4453.59	1	390.71	372.403	1	214.332	127.053	18	3.70133	11.1661	18	0.0754286	0.155142	3	0.0644286	0.215022	3	55	22.4123	3	-30	6.80442	3
	-52030	12685.5	1	-33366.7	12421.4	1	53753.3	15460.9	1	42936.7	11266.2	1	-1316.39	3948.73	1	54.0984	51.5635	1	319.225	121.193	18	222.58	146.248	18	1.3785	1.03016	6	3.2243	3.54833	6	45	18.3373	3	-32	7.25805	3
	-38630	9418.4	1	-35990	880	1	37280	1760	1	35670	670	1	-1484.7	4453.59	1	847.541	807.828	1	319.225	121.193	18	5.4661	11.3953	18	1.3785	1.03016	6	2.80374	2.51817	6	37	15.0774	3	-39	8.84575	3
	-21404.3	5218.59	1	-19205.5	7149.61	1	15413.8	4433.43	1	13847.5	3633.46	1	-2037.7	6112.41	1	-571.038	544.281	1	440.083	113.403	21	251.769	162.143	21	2.29429	0.870974	3	2.15286	0.816538	3	24	9.77991	3	-36	8.16531	3
													30.7693	92.2972	1	-12.0403	11.4761	1	440.083	113.403	21	25.5501	18.734	21	0.345714	0.108872	3	0.298571	0.0816538	3	60	24.4498	3	-38	8.61893	3
													-9.97348	29.917	1	19.3526	18.4458	1	3.1	0.1	3	-2.81	0.1	3	1.18009	0.736183	2	0.916363	0.556738	6	41	16.7074	3	-31	7.03124	3
													-18.7634	56.2836	1	-6.84293	6.52229	1	106	76.5566	3	1	2.07846	3	0.0047842	0.0576517	3	2.86685	1.86115	3	65	26.4873	3	-38	8.61893	3
													-23.4571	70.3631	1	24.2062	23.072	1	122	57.8505	3	0	2.42487	3	0.0291212	0.0686594	3	0.105118	0.107406	3	50	20.3748	3	-34	7.71168	3
													-17.2407	1.89941	4	-533.774	650.201	4	106	76.5566	3	4	4.15692	3	0.0197973	0.0940974	3	0.0244876	0.0508954	3	15	6.11245	3	-35	7.93849	3
													-585.96	247.144	4	-566.793	690.439	4	122	57.8505	3	5	6.9282	3	-0.106057	0.284071	3	-0.0117986	0.0464642	3	17	6.92744	3	-37	8.39212	3
													-195.75	14.3335	4	-1293.46	1575.6	4	106	76.5566	3	5	3.2909	3	-0.0422778	0.12134	3	0.0489751	0.136101	3	43	17.5223	3	-31	7.03124	3
													-774.063	326.742	4	-1399.96	96.0056	4	122	57.8505	3	16	12.2976	3	-0.00424229	0.153457	3	0.111307	0.1044	3	40	16.2999	3	-30	6.80442	3
													-401.699	32.1727	4	-352.516	429.437	4	51	61.032	3	5	6.00833	10	-0.0530286	0.144354	3	-0.00756888	0.0363468	3	-7.08	2.88507	18	-15.22	3.45211	18
													-1222.99	291.57	3	953.912	1166.16	3	101	133.448	3	13	25.9307	10	-0.00212114	0.110349	3	0.00601058	0.0540245	3	-7.08	2.88507	18	-36.11	8.19026	18
													-1089.44	396.381	3	518.321	639.041	3	51	61.032	3	1	5.6921	10	0.047842	0.0441064	3	0.828201	0.596625	3	-12.04	4.90626	18	-15.22	3.45211	18
													-6415.32	6104.44	3	1392.84	1342.19	3	101	133.448	3	17	24.982	10	0.270411	0.176375	3	1.01932	0.853637	3	-12.04	4.90626	18	-24.07	5.45941	18
													-988.397	1706.65	5	-341.083	4448.71	5	244.124	272.168	4	190.384	711.506	6	0.0848457	0.231507	3	0.164734	0.183376	3	-4.96	2.02118	21	-10.09	2.28855	21
													327.323	2944.13	5	857.98	5173.28	5	244.124	272.168	4	6.70432	25.0555	6	0.0777752	0.210379	3	0.0400706	0.0157963	3	-4.96	2.02118	21	-14.16	3.21169	21
													-7040	1650	1	-3226.67	953.333	1	66.3	102	14	5.1	30.6	40	0.0836749	0.222676	3	0.106855	0.121909	3	-24.4	23.9023	3	-57.4	28.4056	3
													-7846.67	1466.67	1	-1870	1283.33	1	178.6	265.3	39	5.1	30.6	40	-0.0120198	0.0651236	3	0.0289398	0.0625671	3	-6.89273	1.33282	3	-25.7648	2.38063	3
													-655.75	1124.84	3	13852.5	8765.26	3	122.45	142.116	39	0.51	1.02	10	0.0587703	0.337928	3	0.0698334	0.104271	3	-7.25457	1.35312	3	-28.5965	2.27856	3
													-388.525	1170.6	3	10594.2	5864.68	3	122.45	142.116	39	-0.51	2.04	5	0.974286	0.172857	4	11.1571	1.88571	4	-6.89273	1.33282	3	-20.42	3.03	3
													-1372.98	924.102	3	9692.62	5495.05	3	122.45	142.116	39	1.02	4.08	16	6.91429	1.88571	4	36.1429	15.4	4	-7.25457	1.35312	3	-22.46	2.21	3
													-1372.98	924.102	3	17704.9	3753.22	3	38.1333	12.9333	8	4.93333	2.53333	7	0.175	0.0666458	3	3.8645	2.34314	3	-6.89273	1.33282	3	-16.0703	1.17265	3
													81.85	1631.67	3	9282.76	6092.17	3	38.1333	12.9333	8	6.93333	6.8	5	0.815	0.720284	3	5.59575	4.41512	3	-7.25457	1.35312	3	-18.4041	1.46528	3
													-983.6	94.6277	3	8811.48	5873.93	3	38.1333	12.9333	8	-0.266667	0.996591	1	0.0055	0.0389284	3	0.559	0.834626	3	-0.59	1.75	4	-18.99	2.77	4
													-80	2009.18	3	4580	4416.73	3	38.1333	12.9333	8	2.66667	3.6	5	0.141429	0.299397	3	1.80714	2.123	3	-2.05	1.38	4	-16.7	1.42	4
													-1270	1593.49	3	4820	4122.28	3	34.8843	2.76049	4	15.5944	2.10278	4	0.11	0.653231	3	4.00714	2.74901	3	-0.59	1.75	4	-17.33	1.8	4
													-4783.77	1766.98	3	-17987	3327.11	3	34.8843	2.76049	4	-3.7234	0.337	4	0.314286	1.80714	3	14.6143	21.8212	3	-2.05	1.38	4	-21.37	1.45	4
													-1943.33	436	3	-4766.67	1203	3	34.8843	2.76049	4	-6.8844	0.447298	4	0.314286	1.80714	3	12.2571	18.3016	3	-5	2.03748	4	-7.66667	1.73891	6
													-2676.67	563	3	-11000	2602	3	12.3249	4.04823	4	4.5682	1.43858	4	3.54196	380.035	34	22.446	202.874	9	-5	2.03748	4	-54.4	12.3387	6
													15730	47184.6	1	22330	21283.7	1	12.3249	4.04823	4	-2.4133	0.283437	4	4.07	1.72	3	4.9	1.52	3	-18.3	5.8	12	-39.6	3.6	23
													11403.3	34206.1	1	21156.7	20165.3	1	12.3249	4.04823	4	0.2877	0.263124	4	4.07	1.72	3	2.09	0.79	3	-18.3	5.8	12	-55.5	4.4	25
													4326.67	12978.5	1	15693.3	14958	1	0.0410882	0.0458084	4	0.174974	0.653915	4	1.1	6.32497	3	5.18571	7.74299	3	-18.3	5.8	12	-65.5	5	7
													1870	5609.36	1	13676.7	13035.8	1	-0.121229	0.135156	4	0.0617247	0.230679	4	1.1	6.32497	3	1.88571	2.81563	3	-18.3	5.8	12	-78.6	7.5	8
													-92854.6	8527.39	3	-62856.8	12642.4	3	-0.121229	0.135156	4	-0.123449	0.461357	4	0.3	0.35	6	3.7	1.05	6	-109	44.4171	4	-121	27.4445	4
													-92854.6	8527.39	3	-50485.3	3652.22	3	-0.121229	0.135156	4	0.123449	0.461357	4	0.3	0.35	6	1.5	0.6	6	-109	44.4171	4	-119	26.9909	4
													-12503.3	37505.7	1	19726.7	18802.3	1	-0.528	0.588656	4	-0.261333	0.976659	4	0.3	0.35	6	37.7	2.95	4	-109	44.4171	4	-138	31.3003	4
													1723.33	5169.41	1	9570	9121.58	1	2.91752	16.5072	8	-0.303332	3.49392	8	-0.355362	38.2508	46	20.1997	184.053	53	-76	30.9697	4	-84	19.0524	4
													-12503.3	37505.7	1	19726.7	18802.3	1	11.7958	13.1509	3	0.268127	1.00205	3	0.2	0.2	3	1.1	0.6	5	-18	7.33494	3	-37	8.39212	3
													1723.33	5169.41	1	9570	9121.58	1	14.6619	16.3462	3	4.25786	15.9125	3							-7.1183	2.08967	3	-41.4205	4.05138	3
													-12503.3	37505.7	1	19726.7	18802.3	1	5.10843	5.69529	3	-0.69713	2.60533	3							-23.3252	9.13452	3	-50.2483	5.54088	3
													1723.33	5169.41	1	9570	9121.58	1	8.2133	9.15684	3	3.0352	11.3432	3							-5.991	3.13385	3	-25.0356	3.35766	3
													-1350	2670	1	-320	1110	1	1294.4	1425.62	4	22.3623	23.3702	3							-28.4567	9.41794	3	-19.0235	6.07915	3
													-5990.5	17969.4	1	-5358	5106.94	1	835.374	1277.33	4	14.3119	14.4165	3							-14.0415	3.86183	3	-37.9121	6.28467	3
													11900	3700	3	38700	4100	3	564.519	574.53	4	18.7843	16.5761	3							-8	3.25997	3	-11	2.49495	3
													9100	3700	3	40900	4100	3	140.798	57.8519	3	22.3653	28.9686	3							-8	3.25997	3	-19	4.30947	3
													25600	4100	3	43100	4400	3	129.847	45.9558	3	14.4866	18.662	3							-7.2	2.1	4	-39.6	17.2	3
																			159.571	73.8168	3	15.7573	19.3751	3							-9.2	4.8	4	-41	11	3
																			1413.94	520.269	3	5.24531	10.6869	3							-9.7	3.7	4	-45.2	11.5	3
																			965.844	308.47	3	5.24531	10.6869	3							-6.75	4.03268	3	-13.2	6.5	3
																			1212.3	318.04	3	5.24531	10.6869	3							-7.05	2.87141	3	-16.9	10.5	3
																			319.203	123.297	3	5.24531	10.6869	3							-8.55	4.9679	3	-16.2	8	3
																			396.021	825.113	3	5.24531	10.6869	3							10.5133	1.03735	3	-89.2967	4.94807	3
																			353.771	377.443	3	5.24531	10.6869	3							21.5818	1.1499	3	-89.2967	4.94807	3
																			1212.3	318.04	3	4.87065	10.043	3							15.4941	0.770248	3	-89.2967	4.94807	3
																			1212.3	318.04	3	4.49598	9.19427	3							-29.2978	7.48714	3	-89.2967	4.94807	3
																			1212.3	318.04	3	6.36931	13.142	3							-15.0926	7.11535	3	-89.2967	4.94807	3
																			353.771	377.443	3	4.87065	10.043	3							-22.9055	5.21628	3	-89.2967	4.94807	3
																			353.771	377.443	3	4.49598	9.19427	3							15.4941	0.770248	3	-91.63	7.79423	3
																			353.771	377.443	3	6.36931	13.142	3							15.4941	0.770248	3	-87.6	10.8253	3
																			116	129.326	6	-9	33.6349	6							15.4941	0.770248	3	-89.2967	6.51251	3
																			157.557	48.6786	3	113.183	73.207	3							-22.9055	5.21628	3	-91.63	7.79423	3
																			20.3724	47.0833	3	23.1893	55.9066	3							-22.9055	5.21628	3	-87.6	10.8253	3
																			155.827	23.0327	3	112.446	45.444	3							-22.9055	5.21628	3	-89.2967	6.51251	3
																			26.091	4.51266	3	36.8004	16.1831	3							-7	2.85247	6	-57	12.9284	6
																			245.984	274.242	1	137.104	512.387	1							-8.1	1.2	3	-13.1	0.8	3
																			54.7059	60.9905	3	0	0	3							-20.4	2.3	3	-28.4	3.2	3
																			57.3529	63.9416	3	0	0	3							-8.1	1.2	3	-13.1	0.8	3
																			1.36508	1.12698	4	-0.0238095	0.047619	4							-20.4	2.3	3	-28.4	3.2	3
																			463.275	273.827	10	96.9548	59.1584	10							-20.1	2	16	-38.2	2	16
																			-3.47023	1.96453	10	5.03661	17.8738	10							-23	3.2	16	-35.3	4.4	16
																			576.058	329.182	4	132.211	124.136	4							7.1	1.3435	3	-26	5.65685	3
																			-5.20534	2.21819	4	-1.25915	2.6243	4							14.2	1.90919	3	-26.3	4.6669	3
																			34.7023	38.6889	10	27.7014	103.526	10							3	1.22249	3	-42	9.52619	3
																			679.547	860.059	46	15.6518	24.3855	73							3	1.22249	3	-41	9.29938	3
																			70.8246	78.9608	46	-0.125893	0.470489	66							-10	23	4	-56	34	4
																			5.4	6.02035	3	1.4	5.2321	3							3	3	10	4	2	10
																			7.5	8.36159	3	1.6	5.97955	3							-19	4	10	-17	7	10
																			1948.06	3162.77	34	12.6985	4.59047	12							3	3	10	4	2	10
																			36.3867	4.15692	3	12.5733	5.12687	3							-19	4	10	-17	7	10
																			42.7397	33.5547	6	15.6164	21.475	6							-15	13	9836	-22	10	11052
																			42.7397	33.5547	6	16.1644	14.764	6							-15	13	9836	-68	23	11052
																			21.18	2.25167	3	9.06	0.952628	3							-14.9098	1.07235	3	-31.9894	1.58019	3
																			13.53	1.59349	3	3.23	0.744782	3							-13.4496	1.4237	3	-31.6062	2.05177	3
																			102.017	83.3458	2	0.614194	11.8696	6							-15	6.11245	3	-38	8.61893	3
																			23	25.6422	4	0.03	0.112116	4							-37.6264	4.42144	6	-45.2227	4.41319	6
																			23	25.6422	4	0.03	0.112116	4							-37.6264	4.42144	6	-55.7757	3.84013	6
																			23	25.6422	4	0.03	0.112116	4							-16	0.7	2	-44	14	6
																			23	25.6422	4	2.2	8.22188	4							-15	6.11245	4	-60	13.6088	4
																			23	25.6422	4	2.2	8.22188	4							-9.63	3.92419	4	-60	13.6088	4
																			9.75292	10.6162	20	0.0153628	0.605445	20							-8.65	3.52484	4	-60	13.6088	4
																			28.5011	28.6529	8	2.15511	5.83444	8							-9.62	3.92012	4	-80	18.1451	4
																			14.8839	86.7921	8	1.73982	9.02837	8							-5.36	2.18418	4	-80	18.1451	4
																			40.5532	36.0425	8	2.08779	4.89997	8							-11	4.48246	3	-23	5.21672	3
																			185.202	63.2215	5	121.186	57.5102	5							-11	4.48246	3	-23	5.21672	3
																			72.3722	16.2903	5	28.3086	7.70134	5							-15	6.11245	3	-20	4.53628	3
																			49.4652	13.3716	5	54.3402	13.782	5							-15	6.11245	3	-20	4.53628	3
																			161.001	78.5978	5	91.077	23.5998	5							-12	4.88996	3	-14	3.1754	3
																			33.1824	11.0476	5	70.5775	17.9972	5							-12	4.88996	3	-14	3.1754	3
																			149.588	54.0026	5	185.745	48.7388	5							-22	8.96492	3	-31	7.03124	3
																			4.34491	9.59618	6	-0.161156	0.558219	6							-22	8.96492	3	-31	7.03124	3
																			4.34491	9.59618	6	-0.0537186	0.539887	6							-2	0.814993	3	-30	6.80442	3
																			4.34491	9.59618	6	0.0537186	0.43312	6							-2	0.814993	3	-30	6.80442	3
																			4.34491	9.59618	6	0.0537186	0.43312	6							-20	8.14993	3	-36	8.16531	3
																			27.5178	12.1376	6	-0.161156	0.561029	6							-20	8.14993	3	-36	8.16531	3
																			27.5178	12.1376	6	-0.0537186	11.6654	6							-16	6.51994	3	-43	9.753	3
																			27.5178	12.1376	6	0.0537186	1.49411	6							-16	6.51994	3	-21	4.7631	3
																			27.5178	12.1376	6	0.0537186	0.43312	6							-16	6.51994	3	-21	4.7631	3
																			17.621	25.0607	6	-0.161156	0.561029	6							-4	1.62999	3	-31	7.03124	3
																			17.621	25.0607	6	-0.0537186	0.539887	6							-21	8.55742	3	-38	8.61893	3
																			17.621	25.0607	6	0.0537186	0.43312	6							0	0	3	-50	11.3407	3
																			17.621	25.0607	6	0.0537186	0.43312	6							-28	11.4099	3	-36	8.16531	3
																			3.03325	6.954	6	0.0537186	0.486467	6							-18	7.33494	3	-24	5.44354	3
																			3.03325	10.1267	6	-0.107437	0.270438	6							-11	4.48246	3	-13	2.94858	3
																			3.03325	10.1267	6	-0.107437	0.391199	6							-16	6.51994	3	-20	4.53628	3
																			3.03325	10.1267	6	-0.0537186	0.379879	6							-12	4.88996	3	-27	6.12398	3
																			11.6275	19.9193	6	0.0537186	0.486467	6							-4	1.62999	3	-31	7.03124	3
																			11.6275	19.9193	6	-0.107437	0.289448	6							-21	8.55742	3	-38	8.61893	3
																			11.6275	19.9193	6	-0.107437	0.391199	6							0	0	3	-50	11.3407	3
																			11.6275	19.9193	6	-0.0537186	0.379879	6							-28	11.4099	3	-36	8.16531	3
																			13.1441	20.2854	6	0.0537186	0.486467	6							-18	7.33494	3	-24	5.44354	3
																			13.1441	20.2854	6	-0.107437	0.289448	6							-11	4.48246	3	-13	2.94858	3
																			13.1441	20.2854	6	-0.107437	0.391199	6							-16	6.51994	3	-20	4.53628	3
																			13.1441	20.2854	6	-0.0537186	0.391199	6							-12	4.88996	3	-27	6.12398	3
																			0.252771	2.03976	6	-0.161156	0.561029	6							0	0	20	-15	3.40221	20
																			0.252771	2.03976	6	-0.161156	0.561029	6							-26.2	1.6	4	-42	1.6	4
																			0.252771	2.03976	6	-0.161156	0.509829	6							1.21569	0.497682	5	-1.36275	0.94223	5
																			0.252771	2.03976	6	-0.214874	0.529426	6							1.66387	0.344183	5	-0.554622	0.631677	5
																			1.26385	3.78274	6	-0.161156	0.561029	6							1.38824	0.465264	5	-1.03529	0.83641	5
																			1.26385	3.78274	6	-0.161156	0.561029	6							0.281046	1.08232	5	0.573529	0.959075	5
																			1.26385	3.78274	6	-0.161156	0.561029	6							1.45752	0.757031	5	1.14879	0.755436	5
																			1.26385	3.78274	6	-0.214874	0.529426	6							3.00929	0.829079	5	2.81115	0.807144	5
																			0.758313	2.17535	6	-0.161156	0.561029	6							-24.4	9.94291	1	-83.7	18.9843	1
																			0.758313	2.17535	6	-0.161156	0.561029	6							-24.4	9.94291	1	-49.1	11.1366	1
																			0.758313	2.17535	6	-0.161156	0.529426	6							-24.4	9.94291	1	-63.8	14.4707	1
																			0.758313	2.17535	6	-0.214874	0.529426	6							-24.4	9.94291	1	-34.4	7.8024	1
																			93.1	103.795	18	32.8	122.581	18							-24.4	9.94291	1	-83.7	18.9843	1
																			82.2	91.6431	15	27.8	103.895	15							-24.4	9.94291	1	-49.1	11.1366	1
																			57.9	64.5515	18	31.7	118.47	18							-24.4	9.94291	1	-63.8	14.4707	1
																			38.4	42.8114	12	22.1	82.5925	12							-24.4	9.94291	1	-34.4	7.8024	1
																			78.1	87.0721	17	34.9	130.429	18							-24.4	9.94291	1	-83.7	18.9843	1
																			53.5	59.646	15	34.5	128.934	15							-24.4	9.94291	1	-49.1	11.1366	1
																			43.6	48.6087	18	14.1	52.6947	18							-24.4	9.94291	1	-63.8	14.4707	1
																			24.4	27.2031	29	5.6	20.9284	33							-24.4	9.94291	1	-34.4	7.8024	1
																			19.7	21.9631	18	10.7	39.9882	18							-20.8	8.47593	1	-48.2	10.9324	1
																			19.9	22.1861	12	11.3	42.2305	12							-20.8	8.47593	1	-46	10.4334	1
																			220.49	245.82	18	-0.5	1.86861	18							-20.8	8.47593	1	-40	9.07256	1
																			395.8	441.269	12	0.2	0.747443	15							-20.8	8.47593	1	-31.5	7.14464	1
																			180.3	201.013	18	0.2	0.747443	18							-20.8	8.47593	1	-48.2	10.9324	1
																			22.6	25.1963	15	0.03	0.112116	15							-20.8	8.47593	1	-46	10.4334	1
																			23.9	26.6456	10	8.7	32.5138	15							-20.8	8.47593	1	-40	9.07256	1
																			130.67	68.1931	3	61.028	43.2424	3							-20.8	8.47593	1	-31.5	7.14464	1
																			130.67	68.1931	3	1.36267	1.51728	3							-20.8	8.47593	1	-48.2	10.9324	1
																			224.954	27.3008	3	41.2194	28.2481	3							-20.8	8.47593	1	-46	10.4334	1
																			319.739	43.9304	3	51.7113	35.1389	3							-20.8	8.47593	1	-40	9.07256	1
																			231.159	29.8494	3	36.3221	24.7837	3							-20.8	8.47593	1	-31.5	7.14464	1
																			493.106	526.283	3	78.7221	80.0451	3							-48.7	19.8451	1	-77.6	17.6008	1
																			806.569	856.382	3	84.6274	85.5251	3							-48.7	19.8451	1	-119.3	27.0589	1
																			660.575	706.607	3	60.9462	61.8333	3							-48.7	19.8451	1	-85.1	19.3019	1
																			119.519	34.8241	3	20.1199	3.77863	3							-48.7	19.8451	1	-90	20.4133	1
																			756.954	966.524	3	140.839	231.797	3							-48.7	19.8451	1	-77.6	17.6008	1
																			99.5992	34.5002	3	2.01199	4.1126	3							-48.7	19.8451	1	-119.3	27.0589	1
																			230.5	197.031	3	118.907	159.666	3							-48.7	19.8451	1	-85.1	19.3019	1
																			1089.64	927.79	3	639.124	304.357	3							-48.7	19.8451	1	-90	20.4133	1
																			146.682	127.237	3	29.7267	18.9234	3							-48.7	19.8451	1	-77.6	17.6008	1
																			158.063	156.238	3	533.279	463.453	3							-48.7	19.8451	1	-119.3	27.0589	1
																			1422.57	1619.31	3	1233.21	527.22	3							-48.7	19.8451	1	-85.1	19.3019	1
																			87.813	511.89	3	83.3248	58.0452	3							-48.7	19.8451	1	-90	20.4133	1
																			129.839	144.754	3	3.22898	12.0674	3							-7.2	5.7	18	-22.1	8.6	18
																			104.976	117.035	3	16.732	62.5312	3							-18.7	7.2	15	-34.5	9.3	15
																			104.976	117.035	3	0	0	3							-10.3	8	18	-20.6	9.7	18
																			113.263	126.275	3	5.28379	19.7467	3							-27.8	9.3	12	-31.9	7.5	12
																			109.12	121.655	3	3.52253	13.1645	3							-7.1	4.7	17	-11.8	6.6	18
																			109.12	121.655	3	0.880632	3.29111	3							-16.6	8.2	15	-17.1	11.3	15
																			78.7367	27.5971	8	125.204	186.104	8							-12.6	7.6	18	-18	8.5	18
																			193.622	614.147	8	-17.3994	20.7273	8							-26.2	12.1	29	-30	11.2	33
																			13.001	49.0212	8	-4.32353	9.62287	8							-17.1	5.2	18	-28.9	7.5	18
																			92.5362	343.166	8	-4.32353	4.23689	8							-38.9	9.4	12	-44.7	8.9	12
																			42	46.8249	3	2	7.47443	3							-2.5	2.3	18	-30.1	13.9	18
																			68	56.9828	4	16	88.274	4							-5.9	4.8	12	-39.7	17.8	15
																			68	56.9828	4	40	220.685	4							-8.3	7.5	18	-32	17.2	18
																			441.333	369.829	4	0	0	4							-32.8	14.8	15	-48.3	15.3	15
																			12.848	8.176	2	-3.504	1.168	2							-27.5	13.7	10	-43.3	10.7	15
																			3.09918	0.977253	4	1.53228	0.416506	4							-1.75369	0.698089	3	-7.76355	0.988327	3
																			3.09918	0.977253	4	0.581798	0.210307	4							-1.75369	0.698089	3	-13.5567	1.76671	3
																			94.0395	104.843	1	47.8505	178.828	1							-1	0.407496	3	-20	4.53628	3
																			84.0706	93.7286	1	46.8536	175.102	1							-1	0.407496	3	-20	4.53628	3
																			100.353	111.882	1	50.1765	187.521	1							-1	0.407496	3	-20	4.53628	3
																			507.984	309.251	8	12.7651	23.8124	4							-1	0.407496	3	-20	4.53628	3
																			96.36	53.436	5	120.888	71.832	5							-1	0.407496	3	-20	4.53628	3
																			434.706	437.349	5	15.2941	15.1263	5							-1	0.407496	3	-20	4.53628	3
																			102.391	25.1495	5	6.65367	9.08852	5							-18.7287	0.97568	3	-28.7695	0.91964	3
																			970.384	1081.86	5	2.34835	4.07305	6							-15.9107	1.02278	3	-23.4539	1.19619	3
																			132.85	167.403	3	10.2	15.5713	3							-11.5958	0.449548	3	-23.2087	0.781013	3
																			136.1	88.3369	3	18.15	9.79392	3							-11.1423	0.601359	3	-18.0273	0.60993	3
																			136.1	88.3369	3	9.9	15.5713	3							-7.50498	0.561476	3	-14.8862	0.594753	3
																			136.1	88.3369	3	1	5.05602	3							-5.97271	0.389936	3	-14.6078	0.447359	3
																			107.675	94.6319	3	39.175	27.6102	3							9.60943	0.824727	3	0.242424	0.325066	3
																			34.4	38.3518	4	-3.06667	11.4608	4							10.7344	0.899078	3	1.41533	0.519516	3
																			34.4	38.3518	4	0.16	0.597955	4							21.8788	1.10818	3	0.768375	1.271	3
																			84.2667	93.9472	4	-1.46667	5.48125	4							-17.5	4.94975	4	-34	11.3137	4
																			16	17.8381	4	-2.36	8.81983	4							-10	5.65685	4	-16.5	3.53553	4
																			11.8667	13.2299	4	-0.6	2.24233	4							10	14.1421	4	-8	2.82843	4
																			21.0667	23.4868	4	-2.48	9.2683	4							-17.5	4.94975	4	-34	11.3137	4
																			75.6533	22.5859	3	1.94667	8.17528	3							-10	5.65685	4	-16.5	3.53553	4
																			36.8133	5.88897	3	0.973333	1.17779	3							10	14.1421	4	-8	2.82843	4
																			198.667	221.489	3	2.8	10.4642	3							-2.9	2.4	3	-24.2	10.3	2
																			345.333	385.005	3	1.33333	4.98296	3							-10.6	7.7	3	-13.2	6.5	3
																			1745.84	3724.25	34	-3.77581	115.31	9							-10.6	7.7	3	-53.1	10.3	1
																			199.12	39.04	3	-1.37	0.68	3							-3.9	3.3	3	-25.6	10.3	2
																			199.12	39.04	3	94.82	9.86	3							-10.2	4.7	3	-16.9	10.3	3
																			172	22	6	1.5	1.6	6							-10.2	4.7	3	-57.1	7.4	1
																			172	22	6	-1.4	1.5	6							0	0	8	-20	4.53628	8
																			172	22	6	-0.6	0.65	4							-22.8356	9.30542	8	-45.1873	10.2491	8
																			1231.85	2386.96	46	23.7789	31.0429	53							-45.6479	18.6014	8	-90.9915	20.6381	8
																			434.706	437.349	5	78.8235	78.92	5							-18.9124	7.70674	8	-40.306	9.14197	8
																			434.706	437.349	5	225.588	225.58	5							-40.5187	20.3702	6	-50.3513	17.9575	6
																			26.0514	12.5158	3	-2.27906	1.8593	3							-40.5187	20.3702	6	-50.4495	14.6613	6
																			118.267	131.853	1	58	216.759	1							-18.4398	7.46607	6	-32.9269	5.91818	6
																			115.067	128.285	1	63.3333	236.69	1							-18.4398	7.46607	6	-40.3671	4.08436	6
																			105.2	117.285	1	45.4667	169.919	1							-25.3276	3.72169	6	-38.1387	2.9417	6
																			118.267	131.853	1	26.1333	97.6659	1							-25.3276	3.72169	6	-44.8709	2.27024	6
																			115.067	128.285	1	31.7333	118.594	1							-48.7617	3.88447	6	-60.4537	3.57114	6
																			105.2	117.285	1	29.7333	111.12	1							-48.7617	3.88447	6	-64.1947	3.05034	6
																			92.5	6.5	3	37.2	3.6	3							-16	6.51994	4	-21	4.7631	4
																			88.8	5.7	3	44.5	6.6	3							-15	6.11245	4	-20	4.53628	4
																			37.5	3.8	3	32.1	6.6	3							-2	0.814993	4	-30	6.80442	4
																															8.68885	0.945968	8	-10.5442	3.10953	8
																															-8.1	1.2	3	-13.1	0.8	3
																															-20.4	2.3	3	-28.4	3.2	3
																															6	22	5	-14	23	5
																															-15.2419	0.798346	3	-86.7473	35.7418	3
																															-9.4	9.3	5	-21.2	14.9	5
																															-6.5	3.5	5	-30.6	14.8	5
																															-7.3	3.6	3	-75.6	14.2	3
																															-4.2	5.2	3	-64.3	5.9	3
																															-14.2266	0.841796	3	-56.101	3.59832	3
																															-12.8213	0.77829	3	-49.306	4.30271	3
																															-45.3	5.71577	3	-60.2	4.67654	3
																															-45.3	5.71577	3	-27.4	4.50333	3
																															-9	1.9	3	-37.76	2.68	3
																															-15	13	9836	-55	15	14736
																															6	22	5	-39	15	5
																															6	22	5	-21	18	5
																															-17.3	2.25167	3	-21.9	3.4641	3
																															-6	-3	3	-21.8	6.5	3
																															-7	4	3	-22.6	5.6	3
																															-22	8.96492	1	-77	17.4647	1
																															-17	6.92744	1	-73	16.5574	1
																															-11	4.48246	1	-59	13.382	1
																															10	4.07496	1	-45	10.2066	1
																															-5.61497	0.897612	3	-132.257	8.67181	3			CO2			CH4			N2O
																															-5.61497	0.897612	3	-65.2351	10.1775	3			Mean	SD	n	Mean	SD	n	Mean	SD	n
																															-7.6	3.09697	1	-20.2	4.58164	1		Pristine	-1619.63	1013.87	142	5804.32	606.286	306	204.992	40.5549	134
																															-2.4	0.977991	1	-23.2	5.26209	1		< 1
																															-4.8	1.95598	1	-19	4.30947	1		1-10
																															-7.6	3.09697	1	-66.4	15.0605	1		10-30
																															-2.4	0.977991	1	-61.5	13.9491	1		30-50
																															-4.8	1.95598	1	-58.5	13.2686	1		>50
Mean	-27215.7	4027.83	98	-26828.7	4276.79	98	24754.9	3731.12	98	29716.9	4171.85	98	-1619.63	1013.87	142	3412.03	1007.08	142	170.715	17.8319	306	25.4784	5.23843	306	0.687892	0.13609	134	3.6343	0.589722	134	-15.9607	1.16577	354	-46.505	1.72645	354
Agriculture	-31496.7	7679.22	1	-47703.3	17758.5	1	24456.7	7034.41	1	44476.7	11670.3	1	-77.5	262.393	16	1700	2340	3							1.81938	10.4614	3	1.43821	2.14745	3	22	8.96492	3	-35	7.93849	3
	-30323.3	7393.15	1	-45173.3	16816.6	1	22513.3	6475.45	1	43303.3	11362.4	1	-4000	11998.6	4	2600	2478.17	4							1.10722	6.36652	3	6.6686	9.95714	3	18	7.33494	3	-25	5.67035	3
	-21404.3	5218.59	1	-19205.5	7149.61	1	15413.8	4433.43	1	13847.5	3633.46	1	-2700	8099.07	4	3900	3717.26	4							0.53232	3.06082	3	2.10397	3.14153	3	14	5.70495	3	-31	7.03124	3
													-2400	7199.18	4	4200	4003.2	4							0.584802	3.3626	3	2.82505	4.2182	3	8	3.25997	3	-30	6.80442	3
													-2700	8099.07	4	5300	5051.66	4							0.0722617	0.415503	3	1.56147	2.3315	3	55	22.4123	3	-30	6.80442	3
													-2850	8549.02	4	5150	4908.69	4							1.068	6.14097	3	1.97459	2.94833	3	45	18.3373	3	-32	7.25805	3
													-7040	1650	1	-3226.67	953.333	1							0.352375	2.02615	3	2.90729	4.34099	3	37	15.0774	3	-39	8.84575	3
													-7846.67	1466.67	1	-1870	1283.33	1							0.23227	1.33555	3	3.19393	4.76898	3	24	9.77991	3	-36	8.16531	3
													-5990.5	17969.4	1	-5358	5106.94	1							0.0727753	0.418456	3	1.91761	2.86326	3	60	24.4498	3	-38	8.61893	3
																									0.31635	1.819	3	3.54269	5.28973	3	41	16.7074	3	-31	7.03124	3
																									0.0216785	0.124651	3	1.41952	2.11955	3	65	26.4873	3	-38	8.61893	3
																									0.0628234	0.361233	3	2.46823	3.68541	3	50	20.3748	3	-34	7.71168	3
																									2.00132	11.5076	3	3.11612	4.6528	3	15	6.11245	3	-35	7.93849	3
																									2.05627	11.8235	3	3.95948	5.91205	3	17	6.92744	3	-37	8.39212	3
																									0.144523	0.831006	3	2.27124	3.39127	3	43	17.5223	3	-31	7.03124	3
																									0.251294	1.44493	3	2.71505	4.05395	3	40	16.2999	3	-30	6.80442	3
																			122.45	142.116	39	-0.51	2.04	5	0.215	0.95704	17	17.1209	30.8177	5	-18.3	5.8	12	-55.5	4.4	25
																			38.1333	12.9333	8	6.93333	6.8	5	4.24286	2.98571	7	7.85714	4.24286	8	-18.3	5.8	12	-65.5	5	7
																			38.1333	12.9333	8	-0.266667	0.996591	1	4.24286	2.98571	7	1.88571	2.81563	1	-18.3	5.8	12	-78.6	7.5	8
																			38.1333	12.9333	8	2.66667	3.6	5	0.593068	2.31254	34	4.49269	1.79388	12	-14.0415	3.86183	3	-37.9121	6.28467	3
																			116	129.326	6	-9	33.6349	6	1.1	6.32497	3	1.88571	2.81563	3	-7	2.85247	6	-57	12.9284	6
																			1948.06	3162.77	34	12.6985	4.59047	12							-15	6.11245	4	-60	13.6088	4
																			23	25.6422	4	0.03	0.112116	4							-9.63	3.92419	4	-60	13.6088	4
																			23	25.6422	4	0.03	0.112116	4							-8.65	3.52484	4	-60	13.6088	4
																			23	25.6422	4	0.03	0.112116	4							-9.62	3.92012	4	-80	18.1451	4
																			23	25.6422	4	2.2	8.22188	4							-5.36	2.18418	4	-80	18.1451	4
																			23	25.6422	4	2.2	8.22188	4							-7.3	3.6	3	-75.6	14.2	3
																			96.36	53.436	5	120.888	71.832	5							-4.2	5.2	3	-64.3	5.9	3
																			118.267	131.853	1	26.1333	97.6659	1							-45.3	5.71577	3	-27.4	4.50333	3
																			115.067	128.285	1	31.7333	118.594	1							-7.6	3.09697	1	-66.4	15.0605	1
																			105.2	117.285	1	29.7333	111.12	1							-2.4	0.977991	1	-61.5	13.9491	1
																															-4.8	1.95598	1	-58.5	13.2686	1
Mean	-27741.4	3186.62	3	-37360.7	9106.94	3	20794.6	2748.27	3	33875.8	10019.9	3	-3956.07	838.581	9	1377.26	1305.21	9	190.054	126.042	15	15.0333	8.19564	15	1.00426	0.273187	21	3.68216	0.761614	21	11.1937	4.91835	32	-47.5066	3.13357	32
Agriculture (N)													-77.5	262.393	16	1790	2340	4	122.45	142.116	39	0.51	1.02	10	0.215	0.95704	17	12.8407	31.6737	14	-45.3	5.71577	3	-60.2	4.67654	3
																			34.4	38.3518	4	-3.06667	11.4608	4	3.54196	380.035	34	22.446	202.874	9	-9	1.9	3	-37.76	2.68	3
																			34.4	38.3518	4	0.16	0.597955	4	4.07	1.72	3	4.9	1.52	3	-15	13	9836	-55	15	14736
																			84.2667	93.9472	4	-1.46667	5.48125	4	4.07	1.72	3	2.09	0.79	3	6	22	5	-39	15	5
																			16	17.8381	4	-2.36	8.81983	4	1.1	6.32497	3	5.18571	7.74299	3	6	22	5	-21	18	5
																			11.8667	13.2299	4	-0.6	2.24233	4	0.3	0.35	6	1.5	0.6	6
																			21.0667	23.4868	4	-2.48	9.2683	4	0.3	0.35	6	37.7	2.95	4
																			1745.84	3724.25	34	-3.77581	115.31	9	-0.355362	38.2508	46	20.1997	184.053	53
																			199.12	39.04	3	-1.37	0.68	3
																			199.12	39.04	3	94.82	9.86	3
																			172	22	6	-1.4	1.5	6
																			172	22	6	-0.6	0.65	4
																			1231.85	2386.96	46	23.7789	31.0429	53
																			434.706	437.349	5	78.8235	78.92	5
																			434.706	437.349	5	225.588	225.58	5
	#DIV/0!	#DIV/0!	0	#DIV/0!	#DIV/0!	0	#DIV/0!	#DIV/0!	0	#DIV/0!	#DIV/0!	0	-77.5	#DIV/0!	1	1790	#DIV/0!	1	327.586	129.052	15	27.1041	16.2836	15	1.6552	0.67242	8	13.3578	4.48829	8	-11.46	9.41656	5	-42.592	6.95149	5
Forestry	-30804.4	7508.69	48	-23917.1	4465.22	48	25786.5	7450.75	48	19674.2	4051.36	48	-2080	200	4	-720	580	4	155.93	91.89	3	-0.52095	0.420619	3	0.0932169	0.205535	3	1.16346	0.389226	3	-6.17	1.6	3	-32.34	1.06	3
	-30804.4	7508.69	48	-22424.6	7078.09	48	25786.5	7450.75	48	34101.6	6764.05	48	-2080	200	4	-1200	800	4	155.93	91.89	3	-0.5015	0.69632	3	0.0932169	0.205535	3	1.61772	0.538782	3	-6.17	1.6	3	-37.89	1.4	3
	-39843.5	12909.5	66	-35035.8	6481.98	66	35408.6	12878.7	66	26888.1	6047.87	66	-5017.91	931.026	48	-4242.87	1877.41	48	155.93	91.89	3	-0.613	0.526	3	0.109127	0.239511	3	1.87111	1.14387	3	-20.33	2.57	3	-32.34	1.06	3
	-39843.5	12909.5	66	-47094.8	13325.7	66	35408.6	12878.7	66	52464.1	12723.4	66	-5017.91	931.026	48	11677	2084.92	48	155.93	91.89	3	-0.35	0.701	3	0.109127	0.239511	3	0.267302	0.160211	3	-20.33	2.57	3	-37.89	1.4	3
	-16584.2	3505.6	57	-18655.5	9333.84	57	12315.9	3346.19	57	12460.3	2060.22	57	-4434.92	891.261	66	-8147.64	2332.23	66	155.93	91.89	3	-0.964	0.263	3	0.109127	0.239511	3	1.63054	0.966164	3	-6.17	1.6	3	-40	0	3
	-16584.2	3505.6	57	-16893.3	9325.42	57	12315.9	3346.19	57	11148.6	2042.05	57	-4434.92	891.261	66	5369.32	3960.99	66	155.93	91.89	3	0.35	1.927	3	0.109127	0.239511	3	2.11168	0.984942	3	-6.17	1.6	3	-14.4755	3.48287	3
	-129103	31476.7	1	-116380	43324.7	1	136437	39242.9	1	134603	35318.7	1	-4268.27	1045.12	57	-6195.25	9103.63	57	77.6798	41.1094	3	1.31787	0.996826	3	-0.101835	0.063291	3	2.96318	0.679484	3	-6.17	1.6	3	-40	0	3
	-130313	31771.8	1	-121147	45099.2	1	132953	38241	1	128553	33731.3	1	-4268.27	1045.12	57	-5744.72	9099.1	57	77.6798	41.1094	3	-1.09987	0.821474	3	0.028689	0.0472675	3	0.803	0.225132	3	-6.17	1.6	3	-31.7101	5.4726	3
	-120743	29438.5	1	-111613	41550.2	1	136987	39401.1	1	130093	34135.3	1	2000	5999.31	3	-6800	6481.37	3	80.9305	80.9275	3	-0.14922	1.92423	3	-0.0146	0.088257	3	0.007884	0.0498225	3	-20.33	2.57	3	-40	0	3
	-128773	31396.3	1	-118947	44280.2	1	127783	36754	1	122870	32240	1	2000	5999.31	3	-6800	6481.37	3	80.9305	80.9275	3	2.50126	2.38319	3	0.07373	0.0350765	3	0.0802635	0.028397	3	-20.33	2.57	3	-14.4755	3.48287	3
	-40673.4	10107.7	8	-44668.8	7435.52	8	25647	7128.47	8	30448.3	38699.4	8	2000	5999.31	3	-8000	7625.14	3	80.9305	80.9275	3	-2.9015	2.23862	3	0.0157143	0.0903568	3	1.02143	1.52514	3	-20.33	2.57	3	-40	0	3
	-5163.66	1258.95	3	-11281.8	4199.85	3	3223.08	927.045	3	10128.9	2657.72	3	2000	5999.31	3	-8000	7625.14	3	80.9305	80.9275	3	1.14015	0.605658	3	0.0235714	0.135535	3	2.12143	3.16759	3	-20.33	2.57	3	-31.7101	5.4726	3
	-6329	1543.08	3	-6508.75	2423	3	5111.97	1470.34	3	5566.42	1460.58	3	2000	5999.31	3	-2000	1906.29	3	76.5986	97.385	3	1.28814	5.04394	3	0.0235714	0.135535	3	0.801429	1.19664	3	-9	3.66747	3	-15	3.40221	3
	-6329	1543.08	3	-4475.64	1666.14	3	5111.97	1470.34	3	5547.62	1455.65	3	2000	5999.31	3	-1999	1905.33	3	76.5986	97.385	3	-0.990878	2.11119	3	0.0157143	0.0903568	3	0.0172857	0.02581	3	-9	3.66747	3	-21	4.7631	3
	-6053.29	1475.86	3	-11865.7	4417.24	3	4090.62	1176.58	3	9751.57	2558.73	3	-55	450	6	-910	180	2	3.31045	3.22256	3	0.972568	5.00563	3	0.0188571	0.108428	3	0.0204286	0.0305027	3	-9	3.66747	3	-26	5.89717	3
	-8439.78	2057.71	3	-8092.57	3012.61	3	5436.64	1563.73	3	7258.53	1904.57	3	-100	270	16	-910	180	2	3.31045	3.22256	3	-0.748129	2.05654	3	0.0125714	0.0722854	3	0.0141429	0.0211173	3	-2.8	0.72	3	-23.33	3.46	3
	-8439.78	2057.71	3	-6425.78	2392.12	3	5436.64	1563.73	3	7678.42	2014.75	3	25.2371	75.7027	3	227.91	217.23	3	69.1892	105.74	3	0.20126	3.76732	3	0.0125714	0.0722854	3	0.0141429	0.0211173	3	-5.04	1.83	3	-37.3	7.39	3
	-5231.5	774.591	5	-7422.05	3514.83	5	4243.1	1520.75	5	7080.96	2727.09	5	826.516	2479.26	3	-2686.08	2560.22	3	69.1892	105.74	3	3.60831	8.77628	3	-0.0963265	0.0540294	3	1.54547	0.289318	3	-11.68	1.82	3	-20.88	1.28	3
	-7616.01	1856.86	5	-11234.3	2636.97	5	7943.33	2284.72	5	12092.3	4450.75	5	-870.681	2611.74	3	-911.638	868.922	3	69.1892	105.74	3	-2.34325	2.17251	3	-0.404403	1.16002	24	0.414401	1.31789	15	-20.85	5.42	3	-21.08	7.29	3
	-32633.3	3600	3	-65926.7	5926	3	30690	3652	3	61160	6593	3	82.0207	246.034	3	-4541.91	4329.09	3	69.1892	105.74	3	1.96948	4.47045	3	0.0227857	0.131017	3	2.10571	3.14412	3	-27.34	6.04	3	-42.07	2.04	3
	-36630	4321	3	-75753.3	7859	3	33953.3	4126	3	64753.3	9463	3	-5500	16498.1	3	-5500	5242.29	3	3.35183	3.21266	3	0.157107	2.94067	3	0.0919286	0.528587	3	0.870571	1.29988	3	-2.62	0.79	3	-21.88	3.76	3
	-131193	31986.3	1	-154037	57343.1	1	146923	42259.2	1	176367	46277.1	1	-5500	16498.1	3	-5500	5242.29	3	3.35183	3.21266	3	2.81671	12.1107	3	0.0534286	0.307213	3	0.0579857	0.0865808	3	-6.51	2.28	3	-46.73	5.78	3
	-138600	33792.1	1	-152680	56838	1	150003	43145.1	1	173837	45613.2	1	7663.33	22987.4	1	18223.3	17369.4	1	3.35183	3.21266	3	-1.82918	1.6562	3	0.240429	1.38246	3	0.883143	1.31866	3	-10.75	1.853	3	-20.14	1.87	3
	-135483	33032.3	1	-150663	56087.3	1	139810	40213.2	1	166357	43650.5	1	2640	7919.09	1	7406.67	7059.61	1	3.35183	3.21266	3	1.53741	3.47621	3	0.0191714	0.110235	3	0.0306429	0.0457541	3	-24.62	6.88	3	-23.22	6.41	3
	-134383	32764.1	1	-148133	55145.5	1	136253	39190.2	1	161810	42457.5	1	16243.3	48724.4	1	18480	17614.1	1	218.59	226.197	25	-1.37308	0.504914	75	0.0477714	0.274685	3	0.216857	0.323798	3	-6.95	1.41	3	-21.5	1.76	3
													-990	2969.66	1	3923.33	3739.5	1	131.4	146.495	3	38.8	145.004	3	0.0545286	0.313538	3	0.0358286	0.0534971	3	-14.43	3.89	3	-28.3	4.55	3
													-15026.4	12368.6	8	-14220.6	39407.3	8	131.4	146.495	3	1.4	5.2321	3	0.0847	0.487023	3	0.0616	0.0919774	3	3.33333	1.52753	3	-18.1	5.6	3
													-1940.58	5821.09	3	-1152.9	1098.88	3	131.4	146.495	3	3.6	13.454	3	0.619759	0.319372	18	0.857605	1.85453	18	6.52	6.22	4	-36.47	14.77	4
													-1217.03	3650.68	3	-942.327	898.172	3	256	285.409	3	-0.4	1.49489	3	0.619759	0.319372	18	1.25782	0.639591	18	-5.83333	5.33854	4	-19.5	4.06202	4
													-1217.03	3650.68	3	1071.98	1021.75	3	580	646.63	3	0.533333	1.99318	3	0.32108	0.194946	18	1.09773	0.533871	18	-17.5	4.94975	4	-34	11.3137	4
													-1962.67	5887.33	3	-2114.15	2015.08	3	78.6667	87.7038	3	34.6667	129.557	3	0.32108	0.194946	18	0.697519	0.315144	18	-10	5.65685	4	-16.5	3.53553	4
													-3003.14	9008.39	3	-834.035	794.955	3	32	35.6761	3	14.6667	54.8125	3	0.634693	0.128564	21	0.754692	0.358647	21	10	14.1421	4	-8	2.82843	4
													-3003.14	9008.39	3	1252.64	1193.95	3	17.1	7.96743	3	11.1	4.33013	3	0.634693	0.128564	21	0.777562	0.424217	21	-27.34	6.04	3	-42.07	2.04	3
													-988.397	1706.65	5	-341.083	4448.71	5	17.3	8.14064	3	12.5	5.02295	3	0.2	0.519615	3	0.9	1.03923	3	-27.34	6.04	3	-42.07	2.04	3
													327.323	2944.13	5	857.98	5173.28	5	29.565	10.6773	3	7.99188	0.8736	3	0.3	0.866025	3	0.7	0.866025	3	-2.62	0.79	3	-21.88	3.76	3
													-655.75	1124.84	3	13852.5	8765.26	3	142.076	118.227	24	1.34264	1.8695	15	0.2	0.519615	3	0.6	0.519615	3	-6.51	2.28	3	-46.73	5.78	3
													-388.525	1170.6	3	10594.2	5864.68	3	29.8775	10.5769	3	21.2484	3.45421	3	0.3	0.866025	3	0.4	0.69282	3	-10.75	1.853	3	-20.14	1.87	3
													-1372.98	924.102	3	9692.62	5495.05	3	24.519	3.85853	3	2.714	1.82043	3	0.2	0.519615	3	0.3	0.519615	3	-24.62	6.88	3	-23.22	6.41	3
													-1372.98	924.102	3	17704.9	3753.22	3	37.001	14.2297	3	17.569	3.32601	3	0.3	0.866025	3	0.4	1.03923	3	-6.95	1.41	3	-21.5	1.76	3
													81.85	1631.67	3	9282.76	6092.17	3	29.018	28.4589	3	44.106	9.75645	3	1	1.58114	10	2	2.84605	10	-14.43	3.89	3	-28.3	4.55	3
													-983.6	94.6277	3	8811.48	5873.93	3	277.333	309.193	3	0.04	0.149489	3	1	1.58114	10	2	4.42719	10	-7.08	2.88507	18	-15.22	3.45211	18
													-1943.33	436	3	-4766.67	1203	3	326.667	364.194	3	-0.106667	0.398636	3	1	1.58114	10	11	13.914	10	-7.08	2.88507	18	-36.11	8.19026	18
													-2676.67	563	3	-11000	2602	3	100.8	112.38	3	1.06667	3.98636	3	1	1.58114	10	6	8.53815	10	-12.04	4.90626	18	-15.22	3.45211	18
													15730	47184.6	1	22330	21283.7	1	93.0667	103.758	3	0.133333	0.498296	3	-0.0688286	0.395763	4	0.19272	0.287758	4	-12.04	4.90626	18	-24.07	5.45941	18
													11403.3	34206.1	1	21156.7	20165.3	1	24	26.7571	3	7.86667	29.3994	3	0	1.71	7	3.42419	13.6968	44	-4.96	2.02118	21	-10.09	2.28855	21
													4326.67	12978.5	1	15693.3	14958	1	24.1333	26.9058	3	8.4	31.3926	3	0.43	0.86	17	3.42419	13.6968	44	-4.96	2.02118	21	-14.16	3.21169	21
													1870	5609.36	1	13676.7	13035.8	1	59.4667	66.2982	3	27.3333	102.151	3	4.24286	2.98571	7	3.77143	1.72857	10	-24.4	23.9023	3	-57.4	28.4056	3
																			50.8	56.6359	3	28.1333	105.14	3	9.3513	53.7698	3	12.2658	18.3146	3	-6.89273	1.33282	3	-25.7648	2.38063	3
																			214.332	127.053	18	74.8075	46.8441	18	10.4444	60.0552	3	19.2891	28.8013	3	-7.25457	1.35312	3	-28.5965	2.27856	3
																			214.332	127.053	18	3.70133	11.1661	18	0.745258	0.238304	3	2.051	1.58487	3	-6.89273	1.33282	3	-20.42	3.03	3
																			319.225	121.193	18	222.58	146.248	18	0.801429	0.190526	3	1.52429	0.353833	3	-7.25457	1.35312	3	-22.46	2.21	3
																			319.225	121.193	18	5.4661	11.3953	18	0.801429	0.190526	3	1.46143	0.217744	3	-6.89273	1.33282	3	-16.0703	1.17265	3
																			440.083	113.403	21	251.769	162.143	21	0.878429	0.161857	4	24.849	0.655286	4	-7.25457	1.35312	3	-18.4041	1.46528	3
																			440.083	113.403	21	25.5501	18.734	21	-0.173934	1.66057	46	6.65171	10.9571	73	-0.59	1.75	4	-18.99	2.77	4
																			3.1	0.1	3	-2.81	0.1	3	0.7	4.02498	3	0.8	1.19451	3	-2.05	1.38	4	-16.7	1.42	4
																			106	76.5566	3	1	2.07846	3	0.0754286	0.155142	3	0.0644286	0.215022	3	-0.59	1.75	4	-17.33	1.8	4
																			122	57.8505	3	0	2.42487	3	2.29429	0.870974	3	2.15286	0.816538	3	-2.05	1.38	4	-21.37	1.45	4
																			106	76.5566	3	4	4.15692	3	0.345714	0.108872	3	0.298571	0.0816538	3	-5	2.03748	4	-7.66667	1.73891	6
																			122	57.8505	3	5	6.9282	3	1.18009	0.736183	2	0.916363	0.556738	6	-18.3	5.8	12	-39.6	3.6	23
																			106	76.5566	3	5	3.2909	3	0.0047842	0.0576517	3	2.86685	1.86115	3	-18	7.33494	3	-37	8.39212	3
																			122	57.8505	3	16	12.2976	3	0.0291212	0.0686594	3	0.105118	0.107406	3	-7.1183	2.08967	3	-41.4205	4.05138	3
																			51	61.032	3	5	6.00833	10	0.0197973	0.0940974	3	0.0244876	0.0508954	3	-23.3252	9.13452	3	-50.2483	5.54088	3
																			101	133.448	3	13	25.9307	10	-0.106057	0.284071	3	-0.0117986	0.0464642	3	-5.991	3.13385	3	-25.0356	3.35766	3
																			51	61.032	3	1	5.6921	10	-0.0422778	0.12134	3	0.0489751	0.136101	3	-28.4567	9.41794	3	-19.0235	6.07915	3
																			101	133.448	3	17	24.982	10	-0.00424229	0.153457	3	0.111307	0.1044	3	-7.2	2.1	4	-39.6	17.2	3
																			244.124	272.168	4	190.384	711.506	6	-0.0530286	0.144354	3	-0.00756888	0.0363468	3	-9.2	4.8	4	-41	11	3
																			66.3	102	14	5.1	30.6	40	-0.00212114	0.110349	3	0.00601058	0.0540245	3	-9.7	3.7	4	-45.2	11.5	3
																			178.6	265.3	39	5.1	30.6	40	0.047842	0.0441064	3	0.828201	0.596625	3	-6.75	4.03268	3	-13.2	6.5	3
																			38.1333	12.9333	8	4.93333	2.53333	7	0.270411	0.176375	3	1.01932	0.853637	3	-7.05	2.87141	3	-16.9	10.5	3
																			2.91752	16.5072	8	-0.303332	3.49392	8	0.0848457	0.231507	3	0.164734	0.183376	3	-8.55	4.9679	3	-16.2	8	3
																			11.7958	13.1509	3	0.268127	1.00205	3	0.0777752	0.210379	3	0.0400706	0.0157963	3	3	1.22249	3	-42	9.52619	3
																			14.6619	16.3462	3	4.25786	15.9125	3	0.0836749	0.222676	3	0.106855	0.121909	3	3	1.22249	3	-41	9.29938	3
																			5.10843	5.69529	3	-0.69713	2.60533	3	-0.0120198	0.0651236	3	0.0289398	0.0625671	3	-10	23	4	-56	34	4
																			8.2133	9.15684	3	3.0352	11.3432	3	0.175	0.0666458	3	3.8645	2.34314	3	-15	13	9836	-22	10	11052
																			1294.4	1425.62	4	22.3623	23.3702	3	0.815	0.720284	3	5.59575	4.41512	3	-14.9098	1.07235	3	-31.9894	1.58019	3
																			835.374	1277.33	4	14.3119	14.4165	3	0.0055	0.0389284	3	0.559	0.834626	3	-13.4496	1.4237	3	-31.6062	2.05177	3
																			564.519	574.53	4	18.7843	16.5761	3							-15	6.11245	3	-38	8.61893	3
																			140.798	57.8519	3	22.3653	28.9686	3							-16	0.7	2	-44	14	6
																			129.847	45.9558	3	14.4866	18.662	3							-11	4.48246	3	-23	5.21672	3
																			159.571	73.8168	3	15.7573	19.3751	3							-11	4.48246	3	-23	5.21672	3
																			1.36508	1.12698	4	-0.0238095	0.047619	4							-15	6.11245	3	-20	4.53628	3
																			679.547	860.059	46	15.6518	24.3855	73							-15	6.11245	3	-20	4.53628	3
																			5.4	6.02035	3	1.4	5.2321	3							-12	4.88996	3	-14	3.1754	3
																			7.5	8.36159	3	1.6	5.97955	3							-12	4.88996	3	-14	3.1754	3
																			36.3867	4.15692	3	12.5733	5.12687	3							-22	8.96492	3	-31	7.03124	3
																			21.18	2.25167	3	9.06	0.952628	3							-22	8.96492	3	-31	7.03124	3
																			13.53	1.59349	3	3.23	0.744782	3							-2	0.814993	3	-30	6.80442	3
																			102.017	83.3458	2	0.614194	11.8696	6							-2	0.814993	3	-30	6.80442	3
																			28.5011	28.6529	8	2.15511	5.83444	8							-20	8.14993	3	-36	8.16531	3
																			14.8839	86.7921	8	1.73982	9.02837	8							-20	8.14993	3	-36	8.16531	3
																			40.5532	36.0425	8	2.08779	4.89997	8							-16	6.51994	3	-43	9.753	3
																			4.34491	9.59618	6	-0.161156	0.558219	6							-16	6.51994	3	-21	4.7631	3
																			4.34491	9.59618	6	-0.0537186	0.539887	6							-16	6.51994	3	-21	4.7631	3
																			4.34491	9.59618	6	0.0537186	0.43312	6							-4	1.62999	3	-31	7.03124	3
																			4.34491	9.59618	6	0.0537186	0.43312	6							-21	8.55742	3	-38	8.61893	3
																			27.5178	12.1376	6	-0.161156	0.561029	6							0	0	3	-50	11.3407	3
																			27.5178	12.1376	6	-0.0537186	11.6654	6							-28	11.4099	3	-36	8.16531	3
																			27.5178	12.1376	6	0.0537186	1.49411	6							-18	7.33494	3	-24	5.44354	3
																			27.5178	12.1376	6	0.0537186	0.43312	6							-11	4.48246	3	-13	2.94858	3
																			17.621	25.0607	6	-0.161156	0.561029	6							-16	6.51994	3	-20	4.53628	3
																			17.621	25.0607	6	-0.0537186	0.539887	6							-12	4.88996	3	-27	6.12398	3
																			17.621	25.0607	6	0.0537186	0.43312	6							-4	1.62999	3	-31	7.03124	3
																			17.621	25.0607	6	0.0537186	0.43312	6							-21	8.55742	3	-38	8.61893	3
																			3.03325	6.954	6	0.0537186	0.486467	6							0	0	3	-50	11.3407	3
																			3.03325	10.1267	6	-0.107437	0.270438	6							-28	11.4099	3	-36	8.16531	3
																			3.03325	10.1267	6	-0.107437	0.391199	6							-18	7.33494	3	-24	5.44354	3
																			3.03325	10.1267	6	-0.0537186	0.379879	6							-11	4.48246	3	-13	2.94858	3
																			11.6275	19.9193	6	0.0537186	0.486467	6							-16	6.51994	3	-20	4.53628	3
																			11.6275	19.9193	6	-0.107437	0.289448	6							-12	4.88996	3	-27	6.12398	3
																			11.6275	19.9193	6	-0.107437	0.391199	6							-26.2	1.6	4	-42	1.6	4
																			11.6275	19.9193	6	-0.0537186	0.379879	6							-24.4	9.94291	1	-83.7	18.9843	1
																			13.1441	20.2854	6	0.0537186	0.486467	6							-24.4	9.94291	1	-49.1	11.1366	1
																			13.1441	20.2854	6	-0.107437	0.289448	6							-24.4	9.94291	1	-63.8	14.4707	1
																			13.1441	20.2854	6	-0.107437	0.391199	6							-24.4	9.94291	1	-34.4	7.8024	1
																			13.1441	20.2854	6	-0.0537186	0.391199	6							-24.4	9.94291	1	-83.7	18.9843	1
																			0.252771	2.03976	6	-0.161156	0.561029	6							-24.4	9.94291	1	-49.1	11.1366	1
																			0.252771	2.03976	6	-0.161156	0.561029	6							-24.4	9.94291	1	-63.8	14.4707	1
																			0.252771	2.03976	6	-0.161156	0.509829	6							-24.4	9.94291	1	-34.4	7.8024	1
																			0.252771	2.03976	6	-0.214874	0.529426	6							-24.4	9.94291	1	-83.7	18.9843	1
																			1.26385	3.78274	6	-0.161156	0.561029	6							-24.4	9.94291	1	-49.1	11.1366	1
																			1.26385	3.78274	6	-0.161156	0.561029	6							-24.4	9.94291	1	-63.8	14.4707	1
																			1.26385	3.78274	6	-0.161156	0.561029	6							-24.4	9.94291	1	-34.4	7.8024	1
																			1.26385	3.78274	6	-0.214874	0.529426	6							-20.8	8.47593	1	-48.2	10.9324	1
																			0.758313	2.17535	6	-0.161156	0.561029	6							-20.8	8.47593	1	-46	10.4334	1
																			0.758313	2.17535	6	-0.161156	0.561029	6							-20.8	8.47593	1	-40	9.07256	1
																			0.758313	2.17535	6	-0.161156	0.529426	6							-20.8	8.47593	1	-31.5	7.14464	1
																			0.758313	2.17535	6	-0.214874	0.529426	6							-20.8	8.47593	1	-48.2	10.9324	1
																			93.1	103.795	18	32.8	122.581	18							-20.8	8.47593	1	-46	10.4334	1
																			82.2	91.6431	15	27.8	103.895	15							-20.8	8.47593	1	-40	9.07256	1
																			57.9	64.5515	18	31.7	118.47	18							-20.8	8.47593	1	-31.5	7.14464	1
																			38.4	42.8114	12	22.1	82.5925	12							-20.8	8.47593	1	-48.2	10.9324	1
																			78.1	87.0721	17	34.9	130.429	18							-20.8	8.47593	1	-46	10.4334	1
																			53.5	59.646	15	34.5	128.934	15							-20.8	8.47593	1	-40	9.07256	1
																			43.6	48.6087	18	14.1	52.6947	18							-20.8	8.47593	1	-31.5	7.14464	1
																			24.4	27.2031	29	5.6	20.9284	33							-48.7	19.8451	1	-77.6	17.6008	1
																			19.7	21.9631	18	10.7	39.9882	18							-48.7	19.8451	1	-119.3	27.0589	1
																			19.9	22.1861	12	11.3	42.2305	12							-48.7	19.8451	1	-85.1	19.3019	1
																			220.49	245.82	18	-0.5	1.86861	18							-48.7	19.8451	1	-90	20.4133	1
																			395.8	441.269	12	0.2	0.747443	15							-48.7	19.8451	1	-77.6	17.6008	1
																			180.3	201.013	18	0.2	0.747443	18							-48.7	19.8451	1	-119.3	27.0589	1
																			22.6	25.1963	15	0.03	0.112116	15							-48.7	19.8451	1	-85.1	19.3019	1
																			23.9	26.6456	10	8.7	32.5138	15							-48.7	19.8451	1	-90	20.4133	1
																			129.839	144.754	3	3.22898	12.0674	3							-48.7	19.8451	1	-77.6	17.6008	1
																			104.976	117.035	3	16.732	62.5312	3							-48.7	19.8451	1	-119.3	27.0589	1
																			104.976	117.035	3	0	0	3							-48.7	19.8451	1	-85.1	19.3019	1
																			113.263	126.275	3	5.28379	19.7467	3							-48.7	19.8451	1	-90	20.4133	1
																			109.12	121.655	3	3.52253	13.1645	3							-7.2	5.7	18	-22.1	8.6	18
																			109.12	121.655	3	0.880632	3.29111	3							-18.7	7.2	15	-34.5	9.3	15
																			193.622	614.147	8	-17.3994	20.7273	8							-10.3	8	18	-20.6	9.7	18
																			13.001	49.0212	8	-4.32353	9.62287	8							-27.8	9.3	12	-31.9	7.5	12
																			92.5362	343.166	8	-4.32353	4.23689	8							-7.1	4.7	17	-11.8	6.6	18
																			42	46.8249	3	2	7.47443	3							-16.6	8.2	15	-17.1	11.3	15
																			68	56.9828	4	16	88.274	4							-12.6	7.6	18	-18	8.5	18
																			68	56.9828	4	40	220.685	4							-26.2	12.1	29	-30	11.2	33
																			441.333	369.829	4	0	0	4							-17.1	5.2	18	-28.9	7.5	18
																			12.848	8.176	2	-3.504	1.168	2							-38.9	9.4	12	-44.7	8.9	12
																			434.706	437.349	5	15.2941	15.1263	5							-2.5	2.3	18	-30.1	13.9	18
																			102.391	25.1495	5	6.65367	9.08852	5							-5.9	4.8	12	-39.7	17.8	15
																			970.384	1081.86	5	2.34835	4.07305	6							-8.3	7.5	18	-32	17.2	18
																			132.85	167.403	3	10.2	15.5713	3							-32.8	14.8	15	-48.3	15.3	15
																			136.1	88.3369	3	18.15	9.79392	3							-27.5	13.7	10	-43.3	10.7	15
																			136.1	88.3369	3	9.9	15.5713	3							-2.9	2.4	3	-24.2	10.3	2
																			136.1	88.3369	3	1	5.05602	3							-10.6	7.7	3	-13.2	6.5	3
																			107.675	94.6319	3	39.175	27.6102	3							-10.6	7.7	3	-53.1	10.3	1
																			118.267	131.853	1	58	216.759	1							-3.9	3.3	3	-25.6	10.3	2
																			115.067	128.285	1	63.3333	236.69	1							-10.2	4.7	3	-16.9	10.3	3
																			105.2	117.285	1	45.4667	169.919	1							-10.2	4.7	3	-57.1	7.4	1
																															-22.8356	9.30542	8	-45.1873	10.2491	8
																															-45.6479	18.6014	8	-90.9915	20.6381	8
																															-18.9124	7.70674	8	-40.306	9.14197	8
																															-16	6.51994	4	-21	4.7631	4
																															-15	6.11245	4	-20	4.53628	4
																															-2	0.814993	4	-30	6.80442	4
																															6	22	5	-14	23	5
																															-9.4	9.3	5	-21.2	14.9	5
																															-6.5	3.5	5	-30.6	14.8	5
																															-6	-3	3	-21.8	6.5	3
																															-7	4	3	-22.6	5.6	3
																															-22	8.96492	1	-77	17.4647	1
																															-17	6.92744	1	-73	16.5574	1
																															-11	4.48246	1	-59	13.382	1
																															10	4.07496	1	-45	10.2066	1
																															-7.6	3.09697	1	-20.2	4.58164	1
																															-2.4	0.977991	1	-23.2	5.26209	1
																															-4.8	1.95598	1	-19	4.30947	1
Mean	-55463.8	10862.5	25	-59651.1	11210.4	25	55402.4	11829.5	25	62907.7	12757	25	-194.692	751.482	47	2023.5	1326.71	47	108.144	13.4173	167	11.1687	2.45037	167	0.56498	0.190887	76	1.98657	0.459707	76	-15.6644	0.919213	185	-36.5032	1.5858	185
Grassland	-7090	1524.2	3	-18490	3689.27	3	7020	1299.04	3	23060	2424.87	3	-80	2009.18	3	4580	4416.73	3	1212.3	324.686	9	4.80305	10.1006	9	0.3	0.35	6	3	0.95	6	11.41	3.12165	4	-91.8	9.7	4
	-6290	1316.36	3	-19210	3290.9	3	5020	917.987	3	24030	2459.51	3	-1270	1593.49	3	4820	4122.28	3	2106.5	550.27	12	-0.369466	0.858462	12	-0.6525	0.0930706	4	0.6623	0.0612651	4	5.655	3.80894	4	-105	8.1	4
	-13830.8	2274.67	3	-66220.4	9098.67	3	8766.07	227.467	3	41998.1	6824	3	-4783.77	1766.98	3	-17987	3327.11	3	382.1	116.458	9	31.0351	65.3585	9	-0.6525	0.0930706	4	0.1247	0.0414502	4	-31.375	10.768	4	-57.38	9.45	4
	-160161	10636.5	3	-207277	21272.6	3	67306.6	13632.7	3	144421	24745.8	3	-92854.6	8527.39	3	-62856.8	12642.4	3	60.9422	16.4004	12	31.0351	65.3585	12	-0.6525	0.0930706	4	0.4203	0.0277308	4	-9	1.9	3	-34.51	4.08	3
	-160161	10636.5	3	-129453	6791.91	3	67306.6	13632.7	3	78968.1	7711.6	3	-92854.6	8527.39	3	-50485.3	3652.22	3	172	22	6	-1.5	0.6	6	-0.3622	0.554237	4	-0.0285	0.0995691	4	-109	44.4171	4	-121	27.4445	4
																			34.8843	2.76049	4	15.5944	2.10278	4	-0.3622	0.554237	4	0.0821	0.0126396	4	-109	44.4171	4	-119	26.9909	4
																			34.8843	2.76049	4	-3.7234	0.337	4	-0.3622	0.554237	4	0.3004	0.0231864	4	-109	44.4171	4	-138	31.3003	4
																			34.8843	2.76049	4	-6.8844	0.447298	4	2.10247	12.0892	4	6.80088	10.1547	4	-76	30.9697	4	-84	19.0524	4
																			12.3249	4.04823	4	4.5682	1.43858	4	0.692443	3.98153	4	1.89002	2.82207	4	10.5133	1.03735	3	-89.2967	4.94807	3
																			12.3249	4.04823	4	-2.4133	0.283437	4	0.692443	3.98153	4	1.20293	1.79615	4	21.5818	1.1499	3	-89.2967	4.94807	3
																			12.3249	4.04823	4	0.2877	0.263124	4	0.692443	3.98153	4	1.54648	2.30911	4	15.4941	0.770248	3	-89.2967	4.94807	3
																			0.0410882	0.0458084	4	0.174974	0.653915	4	1.07574	6.1855	4	1.01035	1.5086	4	-29.2978	7.48714	3	-89.2967	4.94807	3
																			-0.121229	0.135156	4	0.0617247	0.230679	4	1.3785	1.03016	6	3.2243	3.54833	6	-15.0926	7.11535	3	-89.2967	4.94807	3
																			-0.121229	0.135156	4	-0.123449	0.461357	4	1.3785	1.03016	6	2.80374	2.51817	6	-22.9055	5.21628	3	-89.2967	4.94807	3
																			-0.121229	0.135156	4	0.123449	0.461357	4	0.974286	0.172857	4	11.1571	1.88571	4	15.4941	0.770248	3	-91.63	7.79423	3
																			-0.528	0.588656	4	-0.261333	0.976659	4	6.91429	1.88571	4	36.1429	15.4	4	15.4941	0.770248	3	-87.6	10.8253	3
																			1413.94	520.269	3	5.24531	10.6869	3	0.141429	0.299397	3	1.80714	2.123	3	15.4941	0.770248	3	-89.2967	6.51251	3
																			965.844	308.47	3	5.24531	10.6869	3	0.11	0.653231	3	4.00714	2.74901	3	-22.9055	5.21628	3	-91.63	7.79423	3
																			1212.3	318.04	3	5.24531	10.6869	3	0.314286	1.80714	3	14.6143	21.8212	3	-22.9055	5.21628	3	-87.6	10.8253	3
																			319.203	123.297	3	5.24531	10.6869	3	0.314286	1.80714	3	12.2571	18.3016	3	-22.9055	5.21628	3	-89.2967	6.51251	3
																			396.021	825.113	3	5.24531	10.6869	3	0.3	0.35	6	3.7	1.05	6	-37.6264	4.42144	6	-45.2227	4.41319	6
																			353.771	377.443	3	5.24531	10.6869	3							-37.6264	4.42144	6	-55.7757	3.84013	6
																			1212.3	318.04	3	4.87065	10.043	3							-1.75369	0.698089	3	-7.76355	0.988327	3
																			1212.3	318.04	3	4.49598	9.19427	3							-1.75369	0.698089	3	-13.5567	1.76671	3
																			1212.3	318.04	3	6.36931	13.142	3							-40.5187	20.3702	6	-50.3513	17.9575	6
																			353.771	377.443	3	4.87065	10.043	3							-40.5187	20.3702	6	-50.4495	14.6613	6
																			353.771	377.443	3	4.49598	9.19427	3							-18.4398	7.46607	6	-32.9269	5.91818	6
																			353.771	377.443	3	6.36931	13.142	3							-18.4398	7.46607	6	-40.3671	4.08436	6
																			42.7397	33.5547	6	15.6164	21.475	6							-25.3276	3.72169	6	-38.1387	2.9417	6
																			42.7397	33.5547	6	16.1644	14.764	6							-25.3276	3.72169	6	-44.8709	2.27024	6
																			130.67	68.1931	3	61.028	43.2424	3							-48.7617	3.88447	6	-60.4537	3.57114	6
																			130.67	68.1931	3	1.36267	1.51728	3							-48.7617	3.88447	6	-64.1947	3.05034	6
																			3.09918	0.977253	4	1.53228	0.416506	4							-14.2266	0.841796	3	-56.101	3.59832	3
																			3.09918	0.977253	4	0.581798	0.210307	4							-12.8213	0.77829	3	-49.306	4.30271	3
																			75.6533	22.5859	3	1.94667	8.17528	3							-17.3	2.25167	3	-21.9	3.4641	3
																			36.8133	5.88897	3	0.973333	1.17779	3							-5.61497	0.897612	3	-132.257	8.67181	3
																			198.667	221.489	3	2.8	10.4642	3							-5.61497	0.897612	3	-65.2351	10.1775	3
																			345.333	385.005	3	1.33333	4.98296	3
																			172	22	6	1.5	1.6	6
																			26.0514	12.5158	3	-2.27906	1.8593	3
Mean	-69506.6	37032.7	5	-88130.2	36044	5	31083.8	14799.7	5	62495.4	22845.1	5	-38368.6	22257.3	5	-24385.8	13953.8	5	366.036	82.1783	40	5.9478	1.87051	40	0.682716	0.351411	21	5.08218	1.80468	21	-23.478	5.51695	37	-71.6863	5.26129	37
Peat extraction	-38630	9418.4	1	-35990	880	1	37280	1760	1	35670	670	1	8950.33	4633.11	6	19004.3	11808.6	6	88	60.4722	6	-2	5.96285	6	-0.0688286	0.395763	4	4.59775	6.86508	4	-15.3	3.2	6	-47.7	6.2	6
													-77.5	262.393	16	665	360	16	107.852	101.115	6	11.097	12.9128	6	0.215	0.95704	17	0.856047	3.42419	7	-4.5	2.76586	2	-18.45	8.95056	2
													-2040	6119.3	3	5060	698.594	3	107.852	101.115	6	23.3722	23.1166	6	0	0	3	0.03	0.0447942	3	-4.5	2.76586	2	-14.3	4.27931	2
													-4180	12538.6	3	1540	1460.7	3	244.124	272.168	4	6.70432	25.0555	6	0	0	3	0.05	0.074657	3	-5	2.03748	4	-54.4	12.3387	6
													-1350	2670	1	-320	1110	1	122.45	142.116	39	1.02	4.08	16	0.0429261	0.246824	46	38.026	56.7781	66	7.1	1.3435	3	-26	5.65685	3
																			54.7059	60.9905	3	0	0	3							14.2	1.90919	3	-26.3	4.6669	3
																			57.3529	63.9416	3	0	0	3							-15	13	9836	-68	23	11052
																			70.8246	78.9608	46	-0.125893	0.470489	66
Mean	-38630	#DIV/0!	1	-35990	#DIV/0!	1	37280	#DIV/0!	1	35670	#DIV/0!	1	260.567	2271.91	5	5189.87	3570.79	5	106.645	21.5105	8	5.00845	3.04352	8	0.0378195	0.0477773	5	8.71195	7.37685	5	-3.28571	4.0856	7	-36.45	7.67031	7
Water table manipulation	-40736.3	9264.57	6	-30951.1	7720.48	6	23661.8	8127.26	6	17959.9	6049.92	6	-17074.5	1832.4	6	-12991.2	15856.4	6	155.371	42.7092	6	185.222	44.6467	6	0.123163	1.53286	3	0.374147	1.1113	3	-38	7.6	3	-73	10.3	3
	-29498.7	5661.68	6	-23758.3	4117.59	6	24809.1	6528.42	6	21625.2	4944.44	6	-4689.64	822.558	6	-2133.05	2649.35	6	12.1217	3.29588	6	18.3903	4.91263	6	0.0587703	0.337928	3	0.0698334	0.104271	3	-38	7.6	3	-112	15.2	3
	-9117.23	2424.32	3	-4187.61	3018.54	3	12663.5	2211.91	3	8364.46	6024.83	3	3546.29	5941.72	3	4176.85	748.674	3	5.38669	4.26802	3	3.99806	4.35031	3							-47	6.8	3	-82	12.3	3
	-9117.23	2424.32	3	-11061.6	1546.86	3	12663.5	2211.91	3	13557.8	1534.78	3	3546.29	5941.72	3	2496.18	441.866	3	5.38669	4.26802	3	2.69388	4.34476	3							-47	6.8	3	-120	11.8	3
	-10940.7	3587.52	3	-1303.69	1460.7	3	12157	3352.78	3	7583.16	4282.3	3	1216.3	2060.91	3	6279.48	947.481	3	4.92557	6.48384	3	4.36152	5.03476	3							-56	10.1	3	-91	11.3	3
	-10940.7	3587.52	3	-13155.4	4763.14	3	12157	3352.78	3	16131.5	7799.71	3	1216.3	2060.91	3	2976.06	692.554	3	4.92557	6.48384	3	2.5656	2.16779	3							-56	10.1	3	-128	14.2	3
	-11180.6	6822.77	3	-2014.79	1143.15	3	12213.3	5829.31	3	13236.1	2169.8	3	1032.65	1588.59	3	11221.3	1545.63	3	6.95868	1.15326	3	1.1759	1.45647	3							-38	7.6	3	-73	10.3	3
	-11180.6	6822.77	3	-13708.5	4128.05	3	12213.3	5829.31	3	16774.9	6880.91	3	1032.65	1588.59	3	3066.4	896.277	3	6.95868	1.15326	3	1.09038	2.18227	3							-38	7.6	3	-112	15.2	3
	-7247.13	2100.96	3	-4029.58	3302.44	3	6440.29	2181.35	3	16039.5	7252.72	3	-806.838	461.405	3	12010	2892.38	3	10.8663	5.33941	3	1.86941	2.12646	3							-44	6.8	3	-79	12.3	3
	-7247.13	2100.96	3	-4582.66	1206.66	3	6440.29	2181.35	3	24633.8	2489.53	3	-806.838	461.405	3	20051.1	2691.2	3	10.8663	5.33941	3	1.22478	3.4038	3							-44	6.8	3	-116	11.8	3
	-7369.27	746.959	3	-3516.01	4890.16	3	11939.3	4483.71	3	16131.5	7799.71	3	4570.03	2072.51	3	12615.5	3401.87	3	9.95273	3.61094	3	1.45577	2.25239	3							-50	6.8	3	-85	12.3	3
	-7369.27	746.959	3	-4661.67	1270.17	3	11939.3	4483.71	3	23301	3584.45	3	4570.03	2072.51	3	18639.3	3134.05	3	9.95273	3.61094	3	1.00454	1.23918	3							-50	6.8	3	-120	11.8	3
	-7939.27	2111.97	3	-3674.03	3492.97	3	12286.1	4228.11	3	22335.9	5098	3	4346.82	1600.24	3	18661.8	3804.37	3	10.2412	7.09379	3	0.961562	1.17811	3							-38	5.41257	3	-73	7.31953	3
	-7939.27	2111.97	3	-4859.2	1397.19	3	12286.1	2603.85	3	23071.2	3447.71	3	4346.82	1600.24	3	18212	4028.23	3	10.2412	7.09379	3	0.456608	1.53139	3							-38	5.41257	3	-112	10.7566	3
	-8294.39	1642.47	3	-4116.49	2228.17	3	9925.3	1567.01	3	11818.2	4651.05	3	1587.38	3333.55	3	7701.75	1365.15	3	7.7977	3.35141	3	3.04017	2.57693	3							-45.68	4.84282	3	-80.65	8.74079	3
	-8294.39	1642.47	3	-7951.71	991.199	3	9925.3	1567.01	3	18874.3	1436.98	3	1456.79	3333.55	3	10922.6	1312.05	3	7.7977	3.35141	3	1.98871	2.78814	3							-45.68	4.84282	3	-118.08	8.35053	3
	-9369.26	2035.72	3	-2299.23	2342.63	3	12061.2	2723.47	3	11429.9	4226.87	3	2691.94	1470.9	3	9130.66	1617.11	3	7.13752	3.96335	3	3.05393	2.94879	3							-53.36	6.39862	3	-88.3	8.32241	3
	-9369.26	2035.72	3	-9078.41	2550.77	3	12061.2	2723.47	3	19572.8	4405.7	3	2691.94	1470.9	3	10494.4	1546.85	3	7.13752	3.96335	3	1.81629	1.27456	3							-53.36	6.39862	3	-124.16	9.30615	3
	-9754.42	3932.13	3	-2761.45	1692.92	3	12245.3	3757.31	3	17331	2585.94	3	2490.89	1134.54	3	14569.5	1911.41	3	8.40299	3.18738	3	1.07945	0.9606	3							-38	7.6	3	-73	10.3	3
	-9754.42	3932.13	3	-9460.83	2248.91	3	12245.3	3459.62	3	19797.1	3942.24	3	2490.89	1134.54	3	10336.3	1988.93	3	8.40299	3.18738	3	0.786169	1.35205	3							-38	7.6	3	-112	15.2	3
	-9117.23	2424.32	3	-11061.6	12004.4	3	12663.5	2011.76	3	13557.8	1534.78	3	3546.29	5941.72	3	2496.18	441.866	3	345.6	358.4	4	-2.4	0.8	4							-47	6.8	3	-82	12.3	3
	-10940.7	3587.52	3	-13155.4	5176.94	3	12157	3352.78	3	16499.1	2145.49	3	1216.3	2060.91	3	3343.73	717.823	3	157.557	48.6786	3	113.183	73.207	3							-47	6.8	3	-120	11.8	3
	-7247.13	2100.96	3	-4582.66	1321.56	3	6440.29	2181.35	3	24633.8	2489.53	3	-806.838	1429.05	3	20051.1	2691.2	3	20.3724	47.0833	3	23.1893	55.9066	3							-56	10.1	3	-91	11.3	3
	-7369.27	746.959	3	-4661.67	1389.64	3	11939.3	4483.71	3	23301	3584.45	3	4570.03	7489.89	3	18639.3	3134.05	3	155.827	23.0327	3	112.446	45.444	3							-56	10.1	3	-128	14.2	3
	-8294.39	1642.47	3	-8210.87	6747.56	3	9925.3	1480	3	18431.2	1392.33	3	1630.91	3386.26	3	10220.4	1209.71	3	26.091	4.51266	3	36.8004	16.1831	3							-38	7.6	3	-73	10.3	3
	-9369.26	2035.72	3	-9418.16	2962.86	3	12061.2	2723.47	3	19491.9	1982.67	3	2691.94	3491.8	3	10073.8	1436.38	3	245.984	274.242	1	137.104	512.387	1							-38	7.6	3	-112	15.2	3
	-17120.4	4174.14	1	-14041.4	5227.16	1	12896.2	3709.29	1	14385.7	3774.67	1	-6476.66	2851.85	3	303.8	833.876	3	463.275	273.827	10	96.9548	59.1584	10							-44	6.8	3	-79	12.3	3
	-15725.8	3834.11	1	-16611.2	6183.85	1	12587.5	3620.51	1	17012.8	4464	1	-5712.15	3273.21	3	-61.3951	529.414	3	-3.47023	1.96453	10	5.03661	17.8738	10							-44	6.8	3	-116	11.8	3
	-17643	3122.52	3	-18545.3	1220.59	3	12121	2737.69	3	14804.6	2182.17	3	-4224.28	12671.4	1	344.326	328.192	1	576.058	329.182	4	132.211	124.136	4							-50	6.8	3	-85	12.3	3
	-16723.6	2362.8	3	-16792.7	2297.57	3	10565.6	3177.88	3	13251	2768.3	3	-3138.29	9413.79	1	401.537	382.722	1	-5.20534	2.21819	4	-1.25915	2.6243	4							-50	6.8	3	-120	11.8	3
	-13221.3	5835.69	3	-13858	8055.43	3	9278.44	3665.3	3	8910.19	4926.31	3	-5522.05	3799.05	3	-3740.72	3396.35	3	34.7023	38.6889	10	27.7014	103.526	10							-38	5.41257	3	-73	7.31953	3
	-12433.2	4080.1	3	-12839.1	6079.75	3	8581.22	3466.47	3	7630.77	3659.78	3	-6157.98	2847.63	3	-3541.64	2451.05	3	9.75292	10.6162	20	0.0153628	0.605445	20							-38	5.41257	3	-112	10.7566	3
	-2994.92	676.52	3	-2403.54	338.397	3	3969.45	723.087	3	4246.55	528.204	3	-3942.85	3165.22	3	-4947.83	674.984	3	185.202	63.2215	5	121.186	57.5102	5							-45.68	4.84282	3	-80.65	8.74079	3
	-3247.74	576.551	3	-2538.13	178.152	3	4869.5	764.579	3	4268.1	956.61	3	-3852.02	1523.88	3	-5208.29	1132.68	3	72.3722	16.2903	5	28.3086	7.70134	5							-45.68	4.84282	3	-118.08	8.35053	3
	-4239.56	1115.02	3	-3364.95	1102.25	3	7477.34	1843.72	3	5971.03	1963.46	3	2799.24	1473.96	20	6964.24	2472.92	20	49.4652	13.3716	5	54.3402	13.782	5							-53.36	6.39862	3	-88.3	8.32241	3
	-2945.16	96.3275	3	-2329.57	936.727	3	2386.83	98.5654	3	2420.49	226.676	3	974.532	469.466	3	1843.01	320.759	3	161.001	78.5978	5	91.077	23.5998	5							-53.36	6.39862	3	-124.16	9.30615	3
	-2887.69	116.061	3	-2017.07	715.266	3	2301.58	97.8987	3	2420.49	564.274	3	1621.76	1098.32	3	1729.97	370.594	3	33.1824	11.0476	5	70.5775	17.9972	5							-38	7.6	3	-112	15.2	3
	-2413.6	229.444	3	-1974.45	445.589	3	3307.46	917.365	3	2946	650.639	3	3237.78	1588.21	3	2606.08	272.81	3	149.588	54.0026	5	185.745	48.7388	5							-47	6.8	3	-120	11.8	3
	-1544.05	837.607	3	-1178.56	1103.81	3	821.957	860.953	3	1214.11	590.586	3	-558.335	748.746	3	90.9264	382.259	3	224.954	27.3008	3	41.2194	28.2481	3							-38	7.6	3	-112	15.2	3
	-998.699	642.031	3	-1433.38	1186.71	3	688.15	827.81	3	910.581	867.05	3	-586.112	363.92	3	403.429	463.613	3	319.739	43.9304	3	51.7113	35.1389	3							-44	6.8	3	-116	11.8	3
	-757.078	753.461	3	-1751.91	1655.7	3	764.611	794.728	3	1696.18	1486.73	3	893.864	1145.19	3	971.546	320.497	3	231.159	29.8494	3	36.3221	24.7837	3							-38	5.41257	3	-112	10.8251	3
	-3659.96	593.485	3	-2778.65	942.718	3	6251.17	266.977	3	7838.28	2291.05	3	-722.094	355.554	3	35.5494	98.4044	3	493.106	526.283	3	78.7221	80.0451	3							-45.68	4.84282	3	-118.24	8.40372	3
	-4810.23	507.91	3	-5079.11	317.388	3	4762.05	997.805	3	6143.13	1144.58	3	-310.549	752.083	3	-522.801	196.666	3	806.569	856.382	3	84.6274	85.5251	3							-26.8	10.9209	3	-62.1	14.0852	3
	-1686.2	951.524	3	-4019.34	183.636	3	2652.48	1183.12	3	3491.73	187.138	3	7.53274	385.9	3	-55.7311	131.304	3	660.575	706.607	3	60.9462	61.8333	3							-8	3.25997	3	-11	2.49495	3
	-7900.04	1770.2	3	-3744.71	2032.4	3	12362.9	2275.27	3	15082.7	2876.42	3	2591.21	1600.55	3	5059.64	1113.54	3	119.519	34.8241	3	20.1199	3.77863	3							-8	3.25997	3	-19	4.30947	3
	-10050.8	1612.55	3	-12603.4	2731.15	3	9984.97	333.566	3	15408.3	3231.81	3	-48.1792	1897.39	3	1064.02	385.191	3	756.954	966.524	3	140.839	231.797	3							-8.1	1.2	3	-13.1	0.8	3
	-3420.21	2581.35	3	-7240.46	1430.82	3	3050.27	3364.46	3	7768.13	631.537	3	966.284	2670.81	3	-527.613	119.076	3	99.5992	34.5002	3	2.01199	4.1126	3							-20.4	2.3	3	-28.4	3.2	3
	-252.976	61.6782	1	-259.329	96.5401	1	243.003	69.8942	1	278.682	73.1236	1	4462.89	2118.44	3	11338	1981.84	3	230.5	197.031	3	118.907	159.666	3							-8.1	1.2	3	-13.1	0.8	3
	-270.833	66.032	1	-301.007	112.056	1	252.07	72.5022	1	294.164	77.186	1	-65.8217	2444.11	3	2804.95	528.035	3	1089.64	927.79	3	639.124	304.357	3							-20.4	2.3	3	-28.4	3.2	3
	-241.071	58.7757	1	-271.678	101.137	1	217.614	62.5918	1	295.884	77.6374	1	-369.935	430.23	3	527.664	650.282	3	146.682	127.237	3	29.7267	18.9234	3							-20.1	2	16	-38.2	2	16
	-1190.89	8.17281	4	-1647.11	42.2133	4	1173.65	59.3123	4	1113.34	77.0302	4	-1484.7	4453.59	1	390.71	372.403	1	158.063	156.238	3	533.279	463.453	3							-23	3.2	16	-35.3	4.4	16
	-1587.86	7.47228	4	-1598.67	44.3367	4	1001.9	31.5355	4	1031.87	95.9155	4	-1316.39	3948.73	1	54.0984	51.5635	1	1422.57	1619.31	3	1233.21	527.22	3							3	3	10	4	2	10
	-1541.16	7.23877	4	-2325.33	61.9656	4	1345.41	87.6958	4	1031.87	302.961	4	-1484.7	4453.59	1	847.541	807.828	1	87.813	511.89	3	83.3248	58.0452	3							-19	4	10	-17	7	10
	-2129.6	6.82564	4	-2860.46	83.0417	4	1355.54	118.505	4	1460.5	101.186	4	-2037.7	6112.41	1	-571.038	544.281	1	78.7367	27.5971	8	125.204	186.104	8							3	3	10	4	2	10
	-2259.29	13.6513	4	-1940.01	56.0709	4	1857.59	103.363	4	1587.5	105.691	4	30.7693	92.2972	1	-12.0403	11.4761	1	94.0395	104.843	1	47.8505	178.828	1							-19	4	10	-17	7	10
	-27659.6	2920.59	3	-19692.3	1592.44	3	26436.6	3571.72	3	20646.2	1492.98	3	-9.97348	29.917	1	19.3526	18.4458	1	84.0706	93.7286	1	46.8536	175.102	1							0	0	20	-15	3.40221	20
	-13417.4	2514	3	-10261.1	928.26	3	12328	1844.65	3	10779.5	1426.08	3	-18.7634	56.2836	1	-6.84293	6.52229	1	100.353	111.882	1	50.1765	187.521	1							1.21569	0.497682	5	-1.36275	0.94223	5
	-17995	1848.15	3	-2054.55	2813.75	3	11579.7	6378.08	3	3447.39	3117.48	3	-23.4571	70.3631	1	24.2062	23.072	1	507.984	309.251	8	12.7651	23.8124	4							1.66387	0.344183	5	-0.554622	0.631677	5
	-51700	12605	1	-15510	5773.89	1	39196.7	11274	1	35236.7	9245.79	1	-17.2407	1.89941	4	-533.774	650.201	4													1.38824	0.465264	5	-1.03529	0.83641	5
	-52030	12685.5	1	-33366.7	12421.4	1	53753.3	15460.9	1	42936.7	11266.2	1	-585.96	247.144	4	-566.793	690.439	4													0.281046	1.08232	5	0.573529	0.959075	5
	-51700	12605	1	-15510	5773.89	1	39196.7	11274	1	35236.7	9245.79	1	-195.75	14.3335	4	-1293.46	1575.6	4													1.45752	0.757031	5	1.14879	0.755436	5
	-52030	12685.5	1	-33366.7	12421.4	1	53753.3	15460.9	1	42936.7	11266.2	1	-774.063	326.742	4	-1399.96	96.0056	4													3.00929	0.829079	5	2.81115	0.807144	5
	-51700	12605	1	-15510	5773.89	1	39196.7	11274	1	35236.7	9245.79	1	-401.699	32.1727	4	-352.516	429.437	4													-1	0.407496	3	-20	4.53628	3
	-52030	12685.5	1	-33366.7	12421.4	1	53753.3	15460.9	1	42936.7	11266.2	1	-1222.99	291.57	3	953.912	1166.16	3													-1	0.407496	3	-20	4.53628	3
													-1089.44	396.381	3	518.321	639.041	3													-1	0.407496	3	-20	4.53628	3
													-6415.32	6104.44	3	1392.84	1342.19	3													-1	0.407496	3	-20	4.53628	3
													-12503.3	37505.7	1	19726.7	18802.3	1													-1	0.407496	3	-20	4.53628	3
													1723.33	5169.41	1	9570	9121.58	1													-1	0.407496	3	-20	4.53628	3
													-12503.3	37505.7	1	19726.7	18802.3	1													-18.7287	0.97568	3	-28.7695	0.91964	3
													1723.33	5169.41	1	9570	9121.58	1													-15.9107	1.02278	3	-23.4539	1.19619	3
													-12503.3	37505.7	1	19726.7	18802.3	1													-11.5958	0.449548	3	-23.2087	0.781013	3
													1723.33	5169.41	1	9570	9121.58	1													-11.1423	0.601359	3	-18.0273	0.60993	3
																															-7.50498	0.561476	3	-14.8862	0.594753	3
																															-5.97271	0.389936	3	-14.6078	0.447359	3
																															9.60943	0.824727	3	0.242424	0.325066	3
																															10.7344	0.899078	3	1.41533	0.519516	3
																															21.8788	1.10818	3	0.768375	1.271	3
																															-17.5	4.94975	4	-34	11.3137	4
																															-10	5.65685	4	-16.5	3.53553	4
																															10	14.1421	4	-8	2.82843	4
																															-17.5	4.94975	4	-34	11.3137	4
																															-10	5.65685	4	-16.5	3.53553	4
																															10	14.1421	4	-8	2.82843	4
																															0	0	8	-20	4.53628	8
																															8.68885	0.945968	8	-10.5442	3.10953	8
																															-8.1	1.2	3	-13.1	0.8	3
																															-20.4	2.3	3	-28.4	3.2	3
																															-15.2419	0.798346	3	-86.7473	35.7418	3
Mean	-12674.3	1821.56	64	-8581.39	1061.12	64	12278.8	1582.67	64	13903	1386.8	64	-572.427	497.258	72	4840.26	867.47	72	184.497	37.5549	58	84.6101	24.9685	58	0.0909667	0.0321964	2	0.22199	0.152157	2	-24.5615	2.3032	88	-57.6018	4.89163	88
Shallow drainage	-30804.4	7508.69	48	-23917.1	4465.22	48	25786.5	7450.75	48	19674.2	4051.36	48	-5017.91	931.026	48	-4242.87	1877.41	48	60.9422	16.4004	12	31.0351	65.3585	12	0.3	0.35	6	3	0.95	6	-31.375	10.768	4	-57.38	9.45	4
	-30804.4	7508.69	48	-22424.6	7078.09	48	25786.5	7450.75	48	34101.6	6764.05	48	-5017.91	931.026	48	11677	2084.92	48	76.5986	97.385	3	1.28814	5.04394	3	-0.101835	0.063291	3	2.96318	0.679484	3	-6.17	1.6	3	-32.34	1.06	3
	-39843.5	12909.5	66	-35035.8	6481.98	66	35408.6	12878.7	66	26888.1	6047.87	66	-4434.92	891.261	66	-8147.64	2332.23	66	3.31045	3.22256	3	0.972568	5.00563	3	-0.0146	0.088257	3	0.007884	0.0498225	3	-20.33	2.57	3	-32.34	1.06	3
	-39843.5	12909.5	66	-47094.8	13325.7	66	35408.6	12878.7	66	52464.1	12723.4	66	-4434.92	891.261	66	5369.32	3960.99	66	3.31045	3.22256	3	-0.748129	2.05654	3	0.07373	0.0350765	3	0.0802635	0.028397	3	-20.33	2.57	3	-37.89	1.4	3
	-16584.2	3505.6	57	-18655.5	9333.84	57	12315.9	3346.19	57	12460.3	2060.22	57	-4268.27	1045.12	57	-6195.25	9103.63	57	69.1892	105.74	3	3.60831	8.77628	3	0.0157143	0.0903568	3	1.02143	1.52514	3	-6.17	1.6	3	-14.4755	3.48287	3
	-16584.2	3505.6	57	-16893.3	9325.42	57	12315.9	3346.19	57	11148.6	2042.05	57	-4268.27	1045.12	57	-5744.72	9099.1	57	69.1892	105.74	3	1.96948	4.47045	3	0.0235714	0.135535	3	2.12143	3.16759	3	-6.17	1.6	3	-31.7101	5.4726	3
	-17120.4	4174.14	1	-14041.4	5227.16	1	12896.2	3709.29	1	14385.7	3774.67	1	2000	5999.31	3	-6800	6481.37	3	3.35183	3.21266	3	0.157107	2.94067	3	0.0157143	0.0903568	3	0.0172857	0.02581	3	-20.33	2.57	3	-40	0	3
	-15725.8	3834.11	1	-16611.2	6183.85	1	12587.5	3620.51	1	17012.8	4464	1	2000	5999.31	3	-6800	6481.37	3	3.35183	3.21266	3	2.81671	12.1107	3	0.0188571	0.108428	3	0.0204286	0.0305027	3	-20.33	2.57	3	-14.4755	3.48287	3
	-40673.4	10107.7	8	-44668.8	7435.52	8	25647	7128.47	8	30448.3	38699.4	8	2000	5999.31	3	-8000	7625.14	3	3.35183	3.21266	3	-1.82918	1.6562	3	0.0125714	0.0722854	3	0.0141429	0.0211173	3	-20.33	2.57	3	-40	0	3
	-2994.92	676.52	3	-2403.54	338.397	3	3969.45	723.087	3	4246.55	528.204	3	2000	5999.31	3	-8000	7625.14	3	3.35183	3.21266	3	1.53741	3.47621	3	0.0125714	0.0722854	3	0.0141429	0.0211173	3	-20.33	2.57	3	-31.7101	5.4726	3
	-3247.74	576.551	3	-2538.13	178.152	3	4869.5	764.579	3	4268.1	956.61	3	2000	5999.31	3	-2000	1906.29	3	172	22	6	-1.5	0.6	6	-0.0963265	0.0540294	3	1.54547	0.289318	3	-9	1.9	3	-34.51	4.08	3
	-4239.56	1115.02	3	-3364.95	1102.25	3	7477.34	1843.72	3	5971.03	1963.46	3	2000	5999.31	3	-1999	1905.33	3	107.852	101.115	6	11.097	12.9128	6	0.0227857	0.131017	3	2.10571	3.14412	3	-4.5	2.76586	2	-18.45	8.95056	2
	-2945.16	96.3275	3	-2329.57	936.727	3	2386.83	98.5654	3	2420.49	226.676	3	826.516	2479.26	3	-2686.08	2560.22	3	107.852	101.115	6	23.3722	23.1166	6	0.0919286	0.528587	3	0.870571	1.29988	3	-4.5	2.76586	2	-14.3	4.27931	2
	-2887.69	116.061	3	-2017.07	715.266	3	2301.58	97.8987	3	2420.49	564.274	3	-870.681	2611.74	3	-911.638	868.922	3	131.4	146.495	3	38.8	145.004	3	0.0534286	0.307213	3	0.0579857	0.0865808	3	-9	3.66747	3	-15	3.40221	3
	-2413.6	229.444	3	-1974.45	445.589	3	3307.46	917.365	3	2946	650.639	3	82.0207	246.034	3	-4541.91	4329.09	3	131.4	146.495	3	1.4	5.2321	3	0.0191714	0.110235	3	0.0306429	0.0457541	3	-9	3.66747	3	-21	4.7631	3
	-1544.05	837.607	3	-1178.56	1103.81	3	821.957	860.953	3	1214.11	590.586	3	-6476.66	2851.85	3	303.8	833.876	3	131.4	146.495	3	3.6	13.454	3	0.0477714	0.274685	3	0.216857	0.323798	3	-9	3.66747	3	-26	5.89717	3
	-998.699	642.031	3	-1433.38	1186.71	3	688.15	827.81	3	910.581	867.05	3	-5712.15	3273.21	3	-61.3951	529.414	3	256	285.409	3	-0.4	1.49489	3	0.0545286	0.313538	3	0.0358286	0.0534971	3	-2.8	0.72	3	-23.33	3.46	3
	-757.078	753.461	3	-1751.91	1655.7	3	764.611	794.728	3	1696.18	1486.73	3	-4224.28	12671.4	1	344.326	328.192	1	78.6667	87.7038	3	34.6667	129.557	3	0.0847	0.487023	3	0.0616	0.0919774	3	-11.68	1.82	3	-20.88	1.28	3
	-3659.96	593.485	3	-2778.65	942.718	3	6251.17	266.977	3	7838.28	2291.05	3	-3138.29	9413.79	1	401.537	382.722	1	32	35.6761	3	14.6667	54.8125	3	0.619759	0.319372	18	0.857605	1.85453	18	-20.85	5.42	3	-21.08	7.29	3
	-4810.23	507.91	3	-5079.11	317.388	3	4762.05	997.805	3	6143.13	1144.58	3	-5500	16498.1	3	-5500	5242.29	3	29.565	10.6773	3	7.99188	0.8736	3	0.619759	0.319372	18	1.25782	0.639591	18	-27.34	6.04	3	-42.07	2.04	3
	-1686.2	951.524	3	-4019.34	183.636	3	2652.48	1183.12	3	3491.73	187.138	3	-5500	16498.1	3	-5500	5242.29	3	29.8775	10.5769	3	21.2484	3.45421	3	0.32108	0.194946	18	1.09773	0.533871	18	-2.62	0.79	3	-21.88	3.76	3
	-7900.04	1770.2	3	-3744.71	2032.4	3	12362.9	2275.27	3	15082.7	2876.42	3	2799.24	1473.96	20	6964.24	2472.92	20	24.519	3.85853	3	2.714	1.82043	3	0.32108	0.194946	18	0.697519	0.315144	18	-10.75	1.853	3	-20.14	1.87	3
	-10050.8	1612.55	3	-12603.4	2731.15	3	9984.97	333.566	3	15408.3	3231.81	3	-15026.4	12368.6	8	-14220.6	39407.3	8	37.001	14.2297	3	17.569	3.32601	3	0.634693	0.128564	21	0.754692	0.358647	21	-24.62	6.88	3	-23.22	6.41	3
	-3420.21	2581.35	3	-7240.46	1430.82	3	3050.27	3364.46	3	7768.13	631.537	3	974.532	469.466	3	1843.01	320.759	3	29.018	28.4589	3	44.106	9.75645	3	0.634693	0.128564	21	0.777562	0.424217	21	-6.95	1.41	3	-21.5	1.76	3
	-5163.66	1258.95	3	-11281.8	4199.85	3	3223.08	927.045	3	10128.9	2657.72	3	1621.76	1098.32	3	1729.97	370.594	3	277.333	309.193	3	0.04	0.149489	3	0.2	0.519615	3	0.9	1.03923	3	-14.43	3.89	3	-28.3	4.55	3
	-6329	1543.08	3	-6508.75	2423	3	5111.97	1470.34	3	5566.42	1460.58	3	3237.78	1588.21	3	2606.08	272.81	3	326.667	364.194	3	-0.106667	0.398636	3	0.3	0.866025	3	0.7	0.866025	3	3.33333	1.52753	3	-18.1	5.6	3
	-6053.29	1475.86	3	-11865.7	4417.24	3	4090.62	1176.58	3	9751.57	2558.73	3	-558.335	748.746	3	90.9264	382.259	3	100.8	112.38	3	1.06667	3.98636	3	0.2	0.519615	3	0.6	0.519615	3	-5.83333	5.33854	4	-19.5	4.06202	4
	-8439.78	2057.71	3	-8092.57	3012.61	3	5436.64	1563.73	3	7258.53	1904.57	3	-586.112	363.92	3	403.429	463.613	3	24	26.7571	3	7.86667	29.3994	3	0.3	0.866025	3	0.4	0.69282	3	-17.5	4.94975	4	-34	11.3137	4
	-27659.6	2920.59	3	-19692.3	1592.44	3	26436.6	3571.72	3	20646.2	1492.98	3	893.864	1145.19	3	971.546	320.497	3	24.1333	26.9058	3	8.4	31.3926	3	0.2	0.519615	3	0.3	0.519615	3	-10	5.65685	4	-16.5	3.53553	4
	-13417.4	2514	3	-10261.1	928.26	3	12328	1844.65	3	10779.5	1426.08	3	-722.094	355.554	3	35.5494	98.4044	3	59.4667	66.2982	3	27.3333	102.151	3	0.3	0.866025	3	0.4	1.03923	3	10	14.1421	4	-8	2.82843	4
	-5231.5	774.591	5	-7422.05	3514.83	5	4243.1	1520.75	5	7080.96	2727.09	5	-310.549	752.083	3	-522.801	196.666	3	50.8	56.6359	3	28.1333	105.14	3	1	1.58114	10	2	2.84605	10	-27.34	6.04	3	-42.07	2.04	3
	-7616.01	1856.86	5	-11234.3	2636.97	5	7943.33	2284.72	5	12092.3	4450.75	5	7.53274	385.9	3	-55.7311	131.304	3	214.332	127.053	18	74.8075	46.8441	18	1	1.58114	10	2	4.42719	10	-27.34	6.04	3	-42.07	2.04	3
	-13830.8	2274.67	3	-66220.4	9098.67	3	8766.07	227.467	3	41998.1	6824	3	2591.21	1600.55	3	5059.64	1113.54	3	214.332	127.053	18	3.70133	11.1661	18	1	1.58114	10	11	13.914	10	-2.62	0.79	3	-21.88	3.76	3
	-32633.3	3600	3	-65926.7	5926	3	30690	3652	3	61160	6593	3	-48.1792	1897.39	3	1064.02	385.191	3	319.225	121.193	18	222.58	146.248	18	1	1.58114	10	6	8.53815	10	-10.75	1.853	3	-20.14	1.87	3
	-36630	4321	3	-75753.3	7859	3	33953.3	4126	3	64753.3	9463	3	966.284	2670.81	3	-527.613	119.076	3	319.225	121.193	18	5.4661	11.3953	18	-0.0688286	0.395763	4	0.19272	0.287758	4	-24.62	6.88	3	-23.22	6.41	3
													4462.89	2118.44	3	11338	1981.84	3	440.083	113.403	21	251.769	162.143	21	4.24286	2.98571	7	3.77143	1.72857	10	-6.95	1.41	3	-21.5	1.76	3
													-65.8217	2444.11	3	2804.95	528.035	3	440.083	113.403	21	25.5501	18.734	21	0.692443	3.98153	4	1.89002	2.82207	4	-14.43	3.89	3	-28.3	4.55	3
													-369.935	430.23	3	527.664	650.282	3	106	76.5566	3	1	2.07846	3	0.692443	3.98153	4	1.20293	1.79615	4	-7.08	2.88507	18	-15.22	3.45211	18
													-1940.58	5821.09	3	-1152.9	1098.88	3	122	57.8505	3	0	2.42487	3	0.692443	3.98153	4	1.54648	2.30911	4	-7.08	2.88507	18	-36.11	8.19026	18
													-1217.03	3650.68	3	-942.327	898.172	3	106	76.5566	3	4	4.15692	3	1.07574	6.1855	4	1.01035	1.5086	4	-12.04	4.90626	18	-15.22	3.45211	18
													-1962.67	5887.33	3	-2114.15	2015.08	3	122	57.8505	3	5	6.9282	3	10.4444	60.0552	3	19.2891	28.8013	3	-12.04	4.90626	18	-24.07	5.45941	18
													-3003.14	9008.39	3	-834.035	794.955	3	106	76.5566	3	5	3.2909	3	-0.173934	1.66057	46	6.65171	10.9571	73	-4.96	2.02118	21	-10.09	2.28855	21
													30.7693	92.2972	1	-12.0403	11.4761	1	122	57.8505	3	16	12.2976	3	0.7	4.02498	3	0.8	1.19451	3	-4.96	2.02118	21	-14.16	3.21169	21
													-1222.99	291.57	3	953.912	1166.16	3	51	61.032	3	5	6.00833	10	0.0754286	0.155142	3	0.0644286	0.215022	3	-6.89273	1.33282	3	-25.7648	2.38063	3
													-1089.44	396.381	3	518.321	639.041	3	101	133.448	3	13	25.9307	10	1.3785	1.03016	6	3.2243	3.54833	6	-7.25457	1.35312	3	-28.5965	2.27856	3
													-988.397	1706.65	5	-341.083	4448.71	5	51	61.032	3	1	5.6921	10	1.3785	1.03016	6	2.80374	2.51817	6	-6.89273	1.33282	3	-20.42	3.03	3
													327.323	2944.13	5	857.98	5173.28	5	101	133.448	3	17	24.982	10	1.18009	0.736183	2	0.916363	0.556738	6	-7.25457	1.35312	3	-22.46	2.21	3
													-4783.77	1766.98	3	-17987	3327.11	3	244.124	272.168	4	190.384	711.506	6	0.0047842	0.0576517	3	2.86685	1.86115	3	-6.89273	1.33282	3	-16.0703	1.17265	3
													-1943.33	436	3	-4766.67	1203	3	38.1333	12.9333	8	4.93333	2.53333	7	0.0291212	0.0686594	3	0.105118	0.107406	3	-7.25457	1.35312	3	-18.4041	1.46528	3
													-2676.67	563	3	-11000	2602	3	-0.121229	0.135156	4	0.0617247	0.230679	4	0.0197973	0.0940974	3	0.0244876	0.0508954	3	-0.59	1.75	4	-18.99	2.77	4
																			-0.121229	0.135156	4	-0.123449	0.461357	4	-0.106057	0.284071	3	-0.0117986	0.0464642	3	-2.05	1.38	4	-16.7	1.42	4
																			-0.121229	0.135156	4	0.123449	0.461357	4	-0.0422778	0.12134	3	0.0489751	0.136101	3	-0.59	1.75	4	-17.33	1.8	4
																			-0.528	0.588656	4	-0.261333	0.976659	4	-0.00424229	0.153457	3	0.111307	0.1044	3	-2.05	1.38	4	-21.37	1.45	4
																			2.91752	16.5072	8	-0.303332	3.49392	8	-0.0530286	0.144354	3	-0.00756888	0.0363468	3	-5	2.03748	4	-7.66667	1.73891	6
																			14.6619	16.3462	3	4.25786	15.9125	3	0.047842	0.0441064	3	0.828201	0.596625	3	-18.3	5.8	12	-39.6	3.6	23
																			5.10843	5.69529	3	-0.69713	2.60533	3	0.270411	0.176375	3	1.01932	0.853637	3	-109	44.4171	4	-121	27.4445	4
																			8.2133	9.15684	3	3.0352	11.3432	3	0.0848457	0.231507	3	0.164734	0.183376	3	-109	44.4171	4	-119	26.9909	4
																			140.798	57.8519	3	22.3653	28.9686	3	0.0777752	0.210379	3	0.0400706	0.0157963	3	-109	44.4171	4	-138	31.3003	4
																			129.847	45.9558	3	14.4866	18.662	3	0.0836749	0.222676	3	0.106855	0.121909	3	-76	30.9697	4	-84	19.0524	4
																			159.571	73.8168	3	15.7573	19.3751	3	-0.0120198	0.0651236	3	0.0289398	0.0625671	3	-18	7.33494	3	-37	8.39212	3
																			157.557	48.6786	3	113.183	73.207	3	1.1	6.32497	3	5.18571	7.74299	3	-23.3252	9.13452	3	-50.2483	5.54088	3
																			20.3724	47.0833	3	23.1893	55.9066	3	1.1	6.32497	3	1.88571	2.81563	3	-5.991	3.13385	3	-25.0356	3.35766	3
																			155.827	23.0327	3	112.446	45.444	3	0.3	0.35	6	37.7	2.95	4	-28.4567	9.41794	3	-19.0235	6.07915	3
																			26.091	4.51266	3	36.8004	16.1831	3							-14.0415	3.86183	3	-37.9121	6.28467	3
																			245.984	274.242	1	137.104	512.387	1							-8	3.25997	3	-11	2.49495	3
																			463.275	273.827	10	96.9548	59.1584	10							-8	3.25997	3	-19	4.30947	3
																			-3.47023	1.96453	10	5.03661	17.8738	10							-6.75	4.03268	3	-13.2	6.5	3
																			576.058	329.182	4	132.211	124.136	4							-7.05	2.87141	3	-16.9	10.5	3
																			-5.20534	2.21819	4	-1.25915	2.6243	4							-8.55	4.9679	3	-16.2	8	3
																			679.547	860.059	46	15.6518	24.3855	73							-8.1	1.2	3	-13.1	0.8	3
																			5.4	6.02035	3	1.4	5.2321	3							-20.4	2.3	3	-28.4	3.2	3
																			7.5	8.36159	3	1.6	5.97955	3							-8.1	1.2	3	-13.1	0.8	3
																			36.3867	4.15692	3	12.5733	5.12687	3							-20.4	2.3	3	-28.4	3.2	3
																			42.7397	33.5547	6	15.6164	21.475	6							-20.1	2	16	-38.2	2	16
																			42.7397	33.5547	6	16.1644	14.764	6							-23	3.2	16	-35.3	4.4	16
																			102.017	83.3458	2	0.614194	11.8696	6							3	3	10	4	2	10
																			9.75292	10.6162	20	0.0153628	0.605445	20							-19	4	10	-17	7	10
																			28.5011	28.6529	8	2.15511	5.83444	8							3	3	10	4	2	10
																			185.202	63.2215	5	121.186	57.5102	5							-19	4	10	-17	7	10
																			72.3722	16.2903	5	28.3086	7.70134	5							-15	13	9836	-22	10	11052
																			49.4652	13.3716	5	54.3402	13.782	5							-14.9098	1.07235	3	-31.9894	1.58019	3
																			161.001	78.5978	5	91.077	23.5998	5							-13.4496	1.4237	3	-31.6062	2.05177	3
																			33.1824	11.0476	5	70.5775	17.9972	5							-15	6.11245	3	-38	8.61893	3
																			149.588	54.0026	5	185.745	48.7388	5							-37.6264	4.42144	6	-45.2227	4.41319	6
																			4.34491	9.59618	6	-0.0537186	0.539887	6							-37.6264	4.42144	6	-55.7757	3.84013	6
																			4.34491	9.59618	6	0.0537186	0.43312	6							-16	0.7	2	-44	14	6
																			27.5178	12.1376	6	-0.0537186	11.6654	6							-11	4.48246	3	-23	5.21672	3
																			27.5178	12.1376	6	0.0537186	0.43312	6							-11	4.48246	3	-23	5.21672	3
																			17.621	25.0607	6	-0.0537186	0.539887	6							-15	6.11245	3	-20	4.53628	3
																			17.621	25.0607	6	0.0537186	0.43312	6							-15	6.11245	3	-20	4.53628	3
																			3.03325	6.954	6	0.0537186	0.486467	6							-12	4.88996	3	-14	3.1754	3
																			3.03325	10.1267	6	-0.107437	0.270438	6							-12	4.88996	3	-14	3.1754	3
																			3.03325	10.1267	6	-0.107437	0.391199	6							-22	8.96492	3	-31	7.03124	3
																			3.03325	10.1267	6	-0.0537186	0.379879	6							-22	8.96492	3	-31	7.03124	3
																			11.6275	19.9193	6	0.0537186	0.486467	6							-2	0.814993	3	-30	6.80442	3
																			11.6275	19.9193	6	-0.107437	0.289448	6							-2	0.814993	3	-30	6.80442	3
																			11.6275	19.9193	6	-0.107437	0.391199	6							-20	8.14993	3	-36	8.16531	3
																			11.6275	19.9193	6	-0.0537186	0.379879	6							-20	8.14993	3	-36	8.16531	3
																			13.1441	20.2854	6	0.0537186	0.486467	6							-16	6.51994	3	-43	9.753	3
																			13.1441	20.2854	6	-0.107437	0.289448	6							-16	6.51994	3	-21	4.7631	3
																			13.1441	20.2854	6	-0.107437	0.391199	6							-16	6.51994	3	-21	4.7631	3
																			13.1441	20.2854	6	-0.0537186	0.391199	6							-4	1.62999	3	-31	7.03124	3
																			0.252771	2.03976	6	-0.161156	0.561029	6							-21	8.55742	3	-38	8.61893	3
																			1.26385	3.78274	6	-0.161156	0.561029	6							-28	11.4099	3	-36	8.16531	3
																			0.758313	2.17535	6	-0.161156	0.561029	6							-18	7.33494	3	-24	5.44354	3
																			93.1	103.795	18	32.8	122.581	18							-11	4.48246	3	-13	2.94858	3
																			82.2	91.6431	15	27.8	103.895	15							-16	6.51994	3	-20	4.53628	3
																			57.9	64.5515	18	31.7	118.47	18							-12	4.88996	3	-27	6.12398	3
																			38.4	42.8114	12	22.1	82.5925	12							-4	1.62999	3	-31	7.03124	3
																			78.1	87.0721	17	34.9	130.429	18							-21	8.55742	3	-38	8.61893	3
																			53.5	59.646	15	34.5	128.934	15							-28	11.4099	3	-36	8.16531	3
																			43.6	48.6087	18	14.1	52.6947	18							-18	7.33494	3	-24	5.44354	3
																			24.4	27.2031	29	5.6	20.9284	33							-11	4.48246	3	-13	2.94858	3
																			19.7	21.9631	18	10.7	39.9882	18							-16	6.51994	3	-20	4.53628	3
																			19.9	22.1861	12	11.3	42.2305	12							-12	4.88996	3	-27	6.12398	3
																			220.49	245.82	18	-0.5	1.86861	18							0	0	20	-15	3.40221	20
																			180.3	201.013	18	0.2	0.747443	18							-26.2	1.6	4	-42	1.6	4
																			22.6	25.1963	15	0.03	0.112116	15							1.21569	0.497682	5	-1.36275	0.94223	5
																			23.9	26.6456	10	8.7	32.5138	15							1.66387	0.344183	5	-0.554622	0.631677	5
																			130.67	68.1931	3	61.028	43.2424	3							1.38824	0.465264	5	-1.03529	0.83641	5
																			130.67	68.1931	3	1.36267	1.51728	3							0.281046	1.08232	5	0.573529	0.959075	5
																			224.954	27.3008	3	41.2194	28.2481	3							1.45752	0.757031	5	1.14879	0.755436	5
																			319.739	43.9304	3	51.7113	35.1389	3							3.00929	0.829079	5	2.81115	0.807144	5
																			231.159	29.8494	3	36.3221	24.7837	3							-24.4	9.94291	1	-49.1	11.1366	1
																			493.106	526.283	3	78.7221	80.0451	3							-24.4	9.94291	1	-34.4	7.8024	1
																			806.569	856.382	3	84.6274	85.5251	3							-24.4	9.94291	1	-49.1	11.1366	1
																			660.575	706.607	3	60.9462	61.8333	3							-24.4	9.94291	1	-34.4	7.8024	1
																			119.519	34.8241	3	20.1199	3.77863	3							-24.4	9.94291	1	-49.1	11.1366	1
																			756.954	966.524	3	140.839	231.797	3							-24.4	9.94291	1	-34.4	7.8024	1
																			99.5992	34.5002	3	2.01199	4.1126	3							-20.8	8.47593	1	-48.2	10.9324	1
																			230.5	197.031	3	118.907	159.666	3							-20.8	8.47593	1	-46	10.4334	1
																			1089.64	927.79	3	639.124	304.357	3							-20.8	8.47593	1	-40	9.07256	1
																			146.682	127.237	3	29.7267	18.9234	3							-20.8	8.47593	1	-31.5	7.14464	1
																			158.063	156.238	3	533.279	463.453	3							-20.8	8.47593	1	-48.2	10.9324	1
																			1422.57	1619.31	3	1233.21	527.22	3							-20.8	8.47593	1	-46	10.4334	1
																			87.813	511.89	3	83.3248	58.0452	3							-20.8	8.47593	1	-40	9.07256	1
																			129.839	144.754	3	3.22898	12.0674	3							-20.8	8.47593	1	-31.5	7.14464	1
																			104.976	117.035	3	16.732	62.5312	3							-20.8	8.47593	1	-48.2	10.9324	1
																			113.263	126.275	3	5.28379	19.7467	3							-20.8	8.47593	1	-46	10.4334	1
																			109.12	121.655	3	3.52253	13.1645	3							-20.8	8.47593	1	-40	9.07256	1
																			78.7367	27.5971	8	125.204	186.104	8							-20.8	8.47593	1	-31.5	7.14464	1
																			193.622	614.147	8	-17.3994	20.7273	8							-48.7	19.8451	1	-77.6	17.6008	1
																			92.5362	343.166	8	-4.32353	4.23689	8							-48.7	19.8451	1	-77.6	17.6008	1
																			68	56.9828	4	16	88.274	4							-48.7	19.8451	1	-77.6	17.6008	1
																			68	56.9828	4	40	220.685	4							-7.2	5.7	18	-22.1	8.6	18
																			441.333	369.829	4	0	0	4							-18.7	7.2	15	-34.5	9.3	15
																			507.984	309.251	8	12.7651	23.8124	4							-10.3	8	18	-20.6	9.7	18
																			434.706	437.349	5	15.2941	15.1263	5							-27.8	9.3	12	-31.9	7.5	12
																			102.391	25.1495	5	6.65367	9.08852	5							-7.1	4.7	17	-11.8	6.6	18
																			970.384	1081.86	5	2.34835	4.07305	6							-16.6	8.2	15	-17.1	11.3	15
																			172	22	6	-0.6	0.65	4							-12.6	7.6	18	-18	8.5	18
																			434.706	437.349	5	225.588	225.58	5							-26.2	12.1	29	-30	11.2	33
																			118.267	131.853	1	58	216.759	1							-17.1	5.2	18	-28.9	7.5	18
																			115.067	128.285	1	63.3333	236.69	1							-38.9	9.4	12	-44.7	8.9	12
																			105.2	117.285	1	45.4667	169.919	1							-2.5	2.3	18	-30.1	13.9	18
																															-8.3	7.5	18	-32	17.2	18
																															-32.8	14.8	15	-48.3	15.3	15
																															-27.5	13.7	10	-43.3	10.7	15
																															-1.75369	0.698089	3	-7.76355	0.988327	3
																															-1.75369	0.698089	3	-13.5567	1.76671	3
																															-1	0.407496	3	-20	4.53628	3
																															-1	0.407496	3	-20	4.53628	3
																															-1	0.407496	3	-20	4.53628	3
																															-1	0.407496	3	-20	4.53628	3
																															-1	0.407496	3	-20	4.53628	3
																															-1	0.407496	3	-20	4.53628	3
																															-18.7287	0.97568	3	-28.7695	0.91964	3
																															-15.9107	1.02278	3	-23.4539	1.19619	3
																															-11.5958	0.449548	3	-23.2087	0.781013	3
																															-11.1423	0.601359	3	-18.0273	0.60993	3
																															-7.50498	0.561476	3	-14.8862	0.594753	3
																															-5.97271	0.389936	3	-14.6078	0.447359	3
																															9.60943	0.824727	3	0.242424	0.325066	3
																															10.7344	0.899078	3	1.41533	0.519516	3
																															21.8788	1.10818	3	0.768375	1.271	3
																															-17.5	4.94975	4	-34	11.3137	4
																															-10	5.65685	4	-16.5	3.53553	4
																															10	14.1421	4	-8	2.82843	4
																															-17.5	4.94975	4	-34	11.3137	4
																															-10	5.65685	4	-16.5	3.53553	4
																															10	14.1421	4	-8	2.82843	4
																															-2.9	2.4	3	-24.2	10.3	2
																															-10.6	7.7	3	-13.2	6.5	3
																															-3.9	3.3	3	-25.6	10.3	2
																															-10.2	4.7	3	-16.9	10.3	3
																															0	0	8	-20	4.53628	8
																															-22.8356	9.30542	8	-45.1873	10.2491	8
																															-18.9124	7.70674	8	-40.306	9.14197	8
																															-40.5187	20.3702	6	-50.3513	17.9575	6
																															-40.5187	20.3702	6	-50.4495	14.6613	6
																															-18.4398	7.46607	6	-32.9269	5.91818	6
																															-18.4398	7.46607	6	-40.3671	4.08436	6
																															-25.3276	3.72169	6	-38.1387	2.9417	6
																															-25.3276	3.72169	6	-44.8709	2.27024	6
																															-48.7617	3.88447	6	-60.4537	3.57114	6
																															-48.7617	3.88447	6	-64.1947	3.05034	6
																															-16	6.51994	4	-21	4.7631	4
																															-15	6.11245	4	-20	4.53628	4
																															-2	0.814993	4	-30	6.80442	4
																															8.68885	0.945968	8	-10.5442	3.10953	8
																															-8.1	1.2	3	-13.1	0.8	3
																															-20.4	2.3	3	-28.4	3.2	3
																															6	22	5	-14	23	5
																															-9.4	9.3	5	-21.2	14.9	5
																															-6.5	3.5	5	-30.6	14.8	5
																															-45.3	5.71577	3	-60.2	4.67654	3
																															-45.3	5.71577	3	-27.4	4.50333	3
																															-9	1.9	3	-37.76	2.68	3
																															6	22	5	-21	18	5
																															-17.3	2.25167	3	-21.9	3.4641	3
																															-6	-3	3	-21.8	6.5	3
																															-7	4	3	-22.6	5.6	3
																															-7.6	3.09697	1	-20.2	4.58164	1
																															-2.4	0.977991	1	-23.2	5.26209	1
																															-4.8	1.95598	1	-19	4.30947	1
Mean	-13272.7	2195.05	35	-16801.7	3378.19	35	11600.7	1844.62	35	15760.7	2823.39	35	-1331.16	477.636	50	-1514.84	763.962	50	142.044	17.1017	155	42.4312	10.0169	155	0.547557	0.179215	63	2.18077	0.683375	63	-15.1623	1.15428	215	-28.5402	1.29195	215
Deep drainage	-9117.23	2424.32	3	-4187.61	3018.54	3	12663.5	2211.91	3	8364.46	6024.83	3	8950.33	4633.11	6	19004.3	11808.6	6	1212.3	324.686	9	4.80305	10.1006	9	0.028689	0.0472675	3	0.803	0.225132	3	11.41	3.12165	4	-91.8	9.7	4
	-9117.23	2424.32	3	-11061.6	1546.86	3	12663.5	2211.91	3	13557.8	1534.78	3	3546.29	5941.72	3	4176.85	748.674	3	2106.5	550.27	12	-0.369466	0.858462	12	0.123163	1.53286	3	0.374147	1.1113	3	5.655	3.80894	4	-105	8.1	4
	-10940.7	3587.52	3	-1303.69	1460.7	3	12157	3352.78	3	7583.16	4282.3	3	3546.29	5941.72	3	2496.18	441.866	3	76.5986	97.385	3	-0.990878	2.11119	3	0.0235714	0.135535	3	0.801429	1.19664	3	-6.17	1.6	3	-37.89	1.4	3
	-10940.7	3587.52	3	-13155.4	4763.14	3	12157	3352.78	3	16131.5	7799.71	3	1216.3	2060.91	3	6279.48	947.481	3	69.1892	105.74	3	0.20126	3.76732	3	-0.404403	1.16002	24	0.414401	1.31789	15	-6.17	1.6	3	-40	0	3
	-11180.6	6822.77	3	-2014.79	1143.15	3	12213.3	5829.31	3	13236.1	2169.8	3	1216.3	2060.91	3	2976.06	692.554	3	69.1892	105.74	3	-2.34325	2.17251	3	0.240429	1.38246	3	0.883143	1.31866	3	-6.17	1.6	3	-40	0	3
	-11180.6	6822.77	3	-13708.5	4128.05	3	12213.3	5829.31	3	16774.9	6880.91	3	1032.65	1588.59	3	11221.3	1545.63	3	88	60.4722	6	-2	5.96285	6	1.81938	10.4614	3	1.43821	2.14745	3	-15.3	3.2	6	-47.7	6.2	6
	-7247.13	2100.96	3	-4029.58	3302.44	3	6440.29	2181.35	3	16039.5	7252.72	3	1032.65	1588.59	3	3066.4	896.277	3	5.38669	4.26802	3	3.99806	4.35031	3	1.10722	6.36652	3	6.6686	9.95714	3	-38	7.6	3	-73	10.3	3
	-7247.13	2100.96	3	-4582.66	1206.66	3	6440.29	2181.35	3	24633.8	2489.53	3	-806.838	461.405	3	12010	2892.38	3	5.38669	4.26802	3	2.69388	4.34476	3	0.53232	3.06082	3	2.10397	3.14153	3	-38	7.6	3	-112	15.2	3
	-7369.27	746.959	3	-3516.01	4890.16	3	11939.3	4483.71	3	16131.5	7799.71	3	-806.838	461.405	3	20051.1	2691.2	3	4.92557	6.48384	3	4.36152	5.03476	3	0.584802	3.3626	3	2.82505	4.2182	3	-47	6.8	3	-82	12.3	3
	-7369.27	746.959	3	-4661.67	1270.17	3	11939.3	4483.71	3	23301	3584.45	3	4570.03	2072.51	3	12615.5	3401.87	3	4.92557	6.48384	3	2.5656	2.16779	3	0.0722617	0.415503	3	1.56147	2.3315	3	-47	6.8	3	-120	11.8	3
	-7939.27	2111.97	3	-3674.03	3492.97	3	12286.1	4228.11	3	22335.9	5098	3	4570.03	2072.51	3	18639.3	3134.05	3	6.95868	1.15326	3	1.1759	1.45647	3	1.068	6.14097	3	1.97459	2.94833	3	-56	10.1	3	-91	11.3	3
	-7939.27	2111.97	3	-4859.2	1397.19	3	12286.1	2603.85	3	23071.2	3447.71	3	4346.82	1600.24	3	18661.8	3804.37	3	6.95868	1.15326	3	1.09038	2.18227	3	0.352375	2.02615	3	2.90729	4.34099	3	-56	10.1	3	-128	14.2	3
	-8294.39	1642.47	3	-4116.49	2228.17	3	9925.3	1567.01	3	11818.2	4651.05	3	4346.82	1600.24	3	18212	4028.23	3	10.8663	5.33941	3	1.86941	2.12646	3	0.23227	1.33555	3	3.19393	4.76898	3	-38	7.6	3	-73	10.3	3
	-8294.39	1642.47	3	-7951.71	991.199	3	9925.3	1567.01	3	18874.3	1436.98	3	1587.38	3333.55	3	7701.75	1365.15	3	10.8663	5.33941	3	1.22478	3.4038	3	0.0727753	0.418456	3	1.91761	2.86326	3	-38	7.6	3	-112	15.2	3
	-9369.26	2035.72	3	-2299.23	2342.63	3	12061.2	2723.47	3	11429.9	4226.87	3	1456.79	3333.55	3	10922.6	1312.05	3	9.95273	3.61094	3	1.45577	2.25239	3	0.31635	1.819	3	3.54269	5.28973	3	-44	6.8	3	-79	12.3	3
	-9369.26	2035.72	3	-9078.41	2550.77	3	12061.2	2723.47	3	19572.8	4405.7	3	2691.94	1470.9	3	9130.66	1617.11	3	9.95273	3.61094	3	1.00454	1.23918	3	0.0216785	0.124651	3	1.41952	2.11955	3	-44	6.8	3	-116	11.8	3
	-9754.42	3932.13	3	-2761.45	1692.92	3	12245.3	3757.31	3	17331	2585.94	3	2691.94	1470.9	3	10494.4	1546.85	3	10.2412	7.09379	3	0.961562	1.17811	3	0.0628234	0.361233	3	2.46823	3.68541	3	-50	6.8	3	-85	12.3	3
	-9754.42	3932.13	3	-9460.83	2248.91	3	12245.3	3459.62	3	19797.1	3942.24	3	2490.89	1134.54	3	14569.5	1911.41	3	10.2412	7.09379	3	0.456608	1.53139	3	2.00132	11.5076	3	3.11612	4.6528	3	-50	6.8	3	-120	11.8	3
	-9117.23	2424.32	3	-11061.6	12004.4	3	12663.5	2011.76	3	13557.8	1534.78	3	2490.89	1134.54	3	10336.3	1988.93	3	7.7977	3.35141	3	3.04017	2.57693	3	2.05627	11.8235	3	3.95948	5.91205	3	-38	5.41257	3	-73	7.31953	3
	-10940.7	3587.52	3	-13155.4	5176.94	3	12157	3352.78	3	16499.1	2145.49	3	3546.29	5941.72	3	2496.18	441.866	3	7.7977	3.35141	3	1.98871	2.78814	3	0.144523	0.831006	3	2.27124	3.39127	3	-38	5.41257	3	-112	10.7566	3
	-7247.13	2100.96	3	-4582.66	1321.56	3	6440.29	2181.35	3	24633.8	2489.53	3	1216.3	2060.91	3	3343.73	717.823	3	7.13752	3.96335	3	3.05393	2.94879	3	0.251294	1.44493	3	2.71505	4.05395	3	-45.68	4.84282	3	-80.65	8.74079	3
	-7369.27	746.959	3	-4661.67	1389.64	3	11939.3	4483.71	3	23301	3584.45	3	-806.838	1429.05	3	20051.1	2691.2	3	7.13752	3.96335	3	1.81629	1.27456	3	-0.0688286	0.395763	4	4.59775	6.86508	4	-45.68	4.84282	3	-118.08	8.35053	3
	-8294.39	1642.47	3	-8210.87	6747.56	3	9925.3	1480	3	18431.2	1392.33	3	4570.03	7489.89	3	18639.3	3134.05	3	8.40299	3.18738	3	1.07945	0.9606	3	4.24286	2.98571	7	7.85714	4.24286	8	-53.36	6.39862	3	-88.3	8.32241	3
	-9369.26	2035.72	3	-9418.16	2962.86	3	12061.2	2723.47	3	19491.9	1982.67	3	1630.91	3386.26	3	10220.4	1209.71	3	8.40299	3.18738	3	0.786169	1.35205	3	4.24286	2.98571	7	1.88571	2.81563	1	-53.36	6.39862	3	-124.16	9.30615	3
	-6329	1543.08	3	-4475.64	1666.14	3	5111.97	1470.34	3	5547.62	1455.65	3	2691.94	3491.8	3	10073.8	1436.38	3	580	646.63	3	0.533333	1.99318	3	9.3513	53.7698	3	12.2658	18.3146	3	-38	7.6	3	-73	10.3	3
	-8439.78	2057.71	3	-6425.78	2392.12	3	5436.64	1563.73	3	7678.42	2014.75	3	25.2371	75.7027	3	227.91	217.23	3	142.076	118.227	24	1.34264	1.8695	15	0	0	3	0.03	0.0447942	3	-38	7.6	3	-112	15.2	3
	-17995	1848.15	3	-2054.55	2813.75	3	11579.7	6378.08	3	3447.39	3117.48	3	-2040	6119.3	3	5060	698.594	3	93.0667	103.758	3	0.133333	0.498296	3	0	0	3	0.05	0.074657	3	-47	6.8	3	-82	12.3	3
	-31496.7	7679.22	1	-47703.3	17758.5	1	24456.7	7034.41	1	44476.7	11670.3	1	-4180	12538.6	3	1540	1460.7	3							0.801429	0.190526	3	1.52429	0.353833	3	-47	6.8	3	-120	11.8	3
	-30323.3	7393.15	1	-45173.3	16816.6	1	22513.3	6475.45	1	43303.3	11362.4	1	-4000	11998.6	4	2600	2478.17	4							0.801429	0.190526	3	1.46143	0.217744	3	-56	10.1	3	-91	11.3	3
	-7090	1524.2	3	-18490	3689.27	3	7020	1299.04	3	23060	2424.87	3	-2700	8099.07	4	3900	3717.26	4							0.878429	0.161857	4	24.849	0.655286	4	-56	10.1	3	-128	14.2	3
	-6290	1316.36	3	-19210	3290.9	3	5020	917.987	3	24030	2459.51	3	-2400	7199.18	4	4200	4003.2	4							0.0429261	0.246824	46	38.026	56.7781	66	-38	7.6	3	-73	10.3	3
	-131193	31986.3	1	-154037	57343.1	1	146923	42259.2	1	176367	46277.1	1	-2700	8099.07	4	5300	5051.66	4							0.141429	0.299397	3	1.80714	2.123	3	-38	7.6	3	-112	15.2	3
	-138600	33792.1	1	-152680	56838	1	150003	43145.1	1	173837	45613.2	1	-2850	8549.02	4	5150	4908.69	4							0.11	0.653231	3	4.00714	2.74901	3	-44	6.8	3	-79	12.3	3
	-135483	33032.3	1	-150663	56087.3	1	139810	40213.2	1	166357	43650.5	1	-1217.03	3650.68	3	1071.98	1021.75	3							-0.355362	38.2508	46	20.1997	184.053	53	-44	6.8	3	-116	11.8	3
	-134383	32764.1	1	-148133	55145.5	1	136253	39190.2	1	161810	42457.5	1	-3003.14	9008.39	3	1252.64	1193.95	3													-50	6.8	3	-85	12.3	3
	-160161	10636.5	3	-207277	21272.6	3	67306.6	13632.7	3	144421	24745.8	3	-6415.32	6104.44	3	1392.84	1342.19	3													-50	6.8	3	-120	11.8	3
	-160161	10636.5	3	-129453	6791.91	3	67306.6	13632.7	3	78968.1	7711.6	3	-7040	1650	1	-3226.67	953.333	1													-38	5.41257	3	-73	7.31953	3
													-7846.67	1466.67	1	-1870	1283.33	1													-38	5.41257	3	-112	10.7566	3
													-80	2009.18	3	4580	4416.73	3													-45.68	4.84282	3	-80.65	8.74079	3
													-1270	1593.49	3	4820	4122.28	3													-45.68	4.84282	3	-118.08	8.35053	3
													15730	47184.6	1	22330	21283.7	1													-53.36	6.39862	3	-88.3	8.32241	3
													11403.3	34206.1	1	21156.7	20165.3	1													-53.36	6.39862	3	-124.16	9.30615	3
													4326.67	12978.5	1	15693.3	14958	1													-38	7.6	3	-112	15.2	3
													1870	5609.36	1	13676.7	13035.8	1	3.1	0.1	3	-2.81	0.1	3							-47	6.8	3	-120	11.8	3
													-92854.6	8527.39	3	-62856.8	12642.4	3	244.124	272.168	4	6.70432	25.0555	6							-38	7.6	3	-112	15.2	3
													-92854.6	8527.39	3	-50485.3	3652.22	3	38.1333	12.9333	8	6.93333	6.8	5							-44	6.8	3	-116	11.8	3
																			38.1333	12.9333	8	-0.266667	0.996591	1							-38	5.41257	3	-112	10.8251	3
																			38.1333	12.9333	8	2.66667	3.6	5							-45.68	4.84282	3	-118.24	8.40372	3
																			11.7958	13.1509	3	0.268127	1.00205	3							-5.04	1.83	3	-37.3	7.39	3
																			1294.4	1425.62	4	22.3623	23.3702	3							-26.8	10.9209	3	-62.1	14.0852	3
																			835.374	1277.33	4	14.3119	14.4165	3							-6.51	2.28	3	-46.73	5.78	3
																			564.519	574.53	4	18.7843	16.5761	3							6.52	6.22	4	-36.47	14.77	4
																			1413.94	520.269	3	5.24531	10.6869	3							-6.51	2.28	3	-46.73	5.78	3
																			965.844	308.47	3	5.24531	10.6869	3							22	8.96492	3	-35	7.93849	3
																			1212.3	318.04	3	5.24531	10.6869	3							18	7.33494	3	-25	5.67035	3
																			319.203	123.297	3	5.24531	10.6869	3							14	5.70495	3	-31	7.03124	3
																			396.021	825.113	3	5.24531	10.6869	3							8	3.25997	3	-30	6.80442	3
																			353.771	377.443	3	5.24531	10.6869	3							55	22.4123	3	-30	6.80442	3
																			1212.3	318.04	3	4.87065	10.043	3							45	18.3373	3	-32	7.25805	3
																			1212.3	318.04	3	4.49598	9.19427	3							37	15.0774	3	-39	8.84575	3
																			1212.3	318.04	3	6.36931	13.142	3							24	9.77991	3	-36	8.16531	3
																			353.771	377.443	3	4.87065	10.043	3							60	24.4498	3	-38	8.61893	3
																			353.771	377.443	3	4.49598	9.19427	3							41	16.7074	3	-31	7.03124	3
																			353.771	377.443	3	6.36931	13.142	3							65	26.4873	3	-38	8.61893	3
																			116	129.326	6	-9	33.6349	6							50	20.3748	3	-34	7.71168	3
																			54.7059	60.9905	3	0	0	3							15	6.11245	3	-35	7.93849	3
																			57.3529	63.9416	3	0	0	3							17	6.92744	3	-37	8.39212	3
																			1.36508	1.12698	4	-0.0238095	0.047619	4							43	17.5223	3	-31	7.03124	3
																			70.8246	78.9608	46	-0.125893	0.470489	66							40	16.2999	3	-30	6.80442	3
																			23	25.6422	4	0.03	0.112116	4							-24.4	23.9023	3	-57.4	28.4056	3
																			23	25.6422	4	0.03	0.112116	4							-5	2.03748	4	-54.4	12.3387	6
																			23	25.6422	4	0.03	0.112116	4							-18.3	5.8	12	-55.5	4.4	25
																			23	25.6422	4	2.2	8.22188	4							-18.3	5.8	12	-65.5	5	7
																			23	25.6422	4	2.2	8.22188	4							-18.3	5.8	12	-78.6	7.5	8
																			4.34491	9.59618	6	-0.161156	0.558219	6							-7.1183	2.08967	3	-41.4205	4.05138	3
																			4.34491	9.59618	6	0.0537186	0.43312	6							-7.2	2.1	4	-39.6	17.2	3
																			27.5178	12.1376	6	-0.161156	0.561029	6							-9.2	4.8	4	-41	11	3
																			27.5178	12.1376	6	0.0537186	1.49411	6							-9.7	3.7	4	-45.2	11.5	3
																			17.621	25.0607	6	-0.161156	0.561029	6							10.5133	1.03735	3	-89.2967	4.94807	3
																			17.621	25.0607	6	0.0537186	0.43312	6							21.5818	1.1499	3	-89.2967	4.94807	3
																			0.252771	2.03976	6	-0.161156	0.561029	6							15.4941	0.770248	3	-89.2967	4.94807	3
																			0.252771	2.03976	6	-0.161156	0.509829	6							-29.2978	7.48714	3	-89.2967	4.94807	3
																			0.252771	2.03976	6	-0.214874	0.529426	6							-15.0926	7.11535	3	-89.2967	4.94807	3
																			1.26385	3.78274	6	-0.161156	0.561029	6							-22.9055	5.21628	3	-89.2967	4.94807	3
																			1.26385	3.78274	6	-0.161156	0.561029	6							15.4941	0.770248	3	-91.63	7.79423	3
																			1.26385	3.78274	6	-0.214874	0.529426	6							15.4941	0.770248	3	-87.6	10.8253	3
																			0.758313	2.17535	6	-0.161156	0.561029	6							15.4941	0.770248	3	-89.2967	6.51251	3
																			0.758313	2.17535	6	-0.161156	0.529426	6							-22.9055	5.21628	3	-91.63	7.79423	3
																			0.758313	2.17535	6	-0.214874	0.529426	6							-22.9055	5.21628	3	-87.6	10.8253	3
																			395.8	441.269	12	0.2	0.747443	15							-22.9055	5.21628	3	-89.2967	6.51251	3
																			104.976	117.035	3	0	0	3							-7	2.85247	6	-57	12.9284	6
																			109.12	121.655	3	0.880632	3.29111	3							7.1	1.3435	3	-26	5.65685	3
																			13.001	49.0212	8	-4.32353	9.62287	8							14.2	1.90919	3	-26.3	4.6669	3
																			75.6533	22.5859	3	1.94667	8.17528	3							3	1.22249	3	-42	9.52619	3
																			36.8133	5.88897	3	0.973333	1.17779	3							3	1.22249	3	-41	9.29938	3
																			1231.85	2386.96	46	23.7789	31.0429	53							-10	23	4	-56	34	4
																			434.706	437.349	5	78.8235	78.92	5							-15	13	9836	-68	23	11052
																			26.0514	12.5158	3	-2.27906	1.8593	3							-15	6.11245	4	-60	13.6088	4
																			118.267	131.853	1	26.1333	97.6659	1							-9.63	3.92419	4	-60	13.6088	4
																			115.067	128.285	1	31.7333	118.594	1							-8.65	3.52484	4	-60	13.6088	4
																			105.2	117.285	1	29.7333	111.12	1							-9.62	3.92012	4	-80	18.1451	4
																															-5.36	2.18418	4	-80	18.1451	4
																															0	0	3	-50	11.3407	3
																															0	0	3	-50	11.3407	3
																															-24.4	9.94291	1	-83.7	18.9843	1
																															-24.4	9.94291	1	-63.8	14.4707	1
																															-24.4	9.94291	1	-83.7	18.9843	1
																															-24.4	9.94291	1	-63.8	14.4707	1
																															-24.4	9.94291	1	-83.7	18.9843	1
																															-24.4	9.94291	1	-63.8	14.4707	1
																															-48.7	19.8451	1	-119.3	27.0589	1
																															-48.7	19.8451	1	-85.1	19.3019	1
																															-48.7	19.8451	1	-90	20.4133	1
																															-48.7	19.8451	1	-119.3	27.0589	1
																															-48.7	19.8451	1	-85.1	19.3019	1
																															-48.7	19.8451	1	-90	20.4133	1
																															-48.7	19.8451	1	-119.3	27.0589	1
																															-48.7	19.8451	1	-85.1	19.3019	1
																															-48.7	19.8451	1	-90	20.4133	1
																															-5.9	4.8	12	-39.7	17.8	15
																															-10.6	7.7	3	-53.1	10.3	1
																															-10.2	4.7	3	-57.1	7.4	1
																															-45.6479	18.6014	8	-90.9915	20.6381	8
																															-15.2419	0.798346	3	-86.7473	35.7418	3
																															-7.3	3.6	3	-75.6	14.2	3
																															-4.2	5.2	3	-64.3	5.9	3
																															-14.2266	0.841796	3	-56.101	3.59832	3
																															-12.8213	0.77829	3	-49.306	4.30271	3
																															-15	13	9836	-55	15	14736
																															6	22	5	-39	15	5
																															-22	8.96492	1	-77	17.4647	1
																															-17	6.92744	1	-73	16.5574	1
																															-11	4.48246	1	-59	13.382	1
																															10	4.07496	1	-45	10.2066	1
																															-5.61497	0.897612	3	-132.257	8.67181	3
																															-5.61497	0.897612	3	-65.2351	10.1775	3
																															-7.6	3.09697	1	-66.4	15.0605	1
																															-2.4	0.977991	1	-61.5	13.9491	1
																															-4.8	1.95598	1	-58.5	13.2686	1
Mean	-31965.1	8253.47	37	-33602.4	9335.79	37	28588.9	7012.24	37	39708.1	8522.78	37	-2979.93	2926.96	46	5932.68	2242.6	46	238.762	46.9505	85	4.10397	1.1635	85	0.908694	0.316999	34	4.88001	1.35861	34	-17.1958	2.37475	139	-74.2923	2.49025	139
<1	-9117.23	2424.32	3	-4187.61	3018.54	3	12663.5	2211.91	3	8364.46	6024.83	3	3546.29	5941.72	3	4176.85	748.674	3	5.38669	4.26802	3	3.99806	4.35031	3	0.123163	1.53286	3	0.374147	1.1113	3	-38	7.6	3	-73	10.3	3
	-7247.13	2100.96	3	-4029.58	3302.44	3	6440.29	2181.35	3	16039.5	7252.72	3	-806.838	461.405	3	12010	2892.38	3	10.8663	5.33941	3	1.86941	2.12646	3	0.619759	0.319372	18	0.857605	1.85453	18	-38	7.6	3	-73	10.3	3
	-8294.39	1642.47	3	-4116.49	2228.17	3	9925.3	1567.01	3	11818.2	4651.05	3	1587.38	3333.55	3	7701.75	1365.15	3	7.7977	3.35141	3	3.04017	2.57693	3	0.32108	0.194946	18	1.09773	0.533871	18	-38	5.41257	3	-73	7.31953	3
	-30804.4	7508.69	48	-23917.1	4465.22	48	25786.5	7450.75	48	19674.2	4051.36	48	-5017.91	931.026	48	-4242.87	1877.41	48	345.6	358.4	4	-2.4	0.8	4	0.634693	0.128564	21	0.754692	0.358647	21	-38	7.6	3	-73	10.3	3
	-39843.5	12909.5	66	-35035.8	6481.98	66	35408.6	12878.7	66	26888.1	6047.87	66	-4434.92	891.261	66	-8147.64	2332.23	66	214.332	127.053	18	74.8075	46.8441	18	2.10247	12.0892	4	6.80088	10.1547	4	-38	7.6	3	-73	10.3	3
	-16584.2	3505.6	57	-18655.5	9333.84	57	12315.9	3346.19	57	12460.3	2060.22	57	-4268.27	1045.12	57	-6195.25	9103.63	57	319.225	121.193	18	222.58	146.248	18	0.692443	3.98153	4	1.89002	2.82207	4	-38	5.41257	3	-73	7.31953	3
	-2994.92	676.52	3	-2403.54	338.397	3	3969.45	723.087	3	4246.55	528.204	3	-6476.66	2851.85	3	303.8	833.876	3	440.083	113.403	21	251.769	162.143	21	0.692443	3.98153	4	1.20293	1.79615	4	-26.8	10.9209	3	-62.1	14.0852	3
	-2945.16	96.3275	3	-2329.57	936.727	3	2386.83	98.5654	3	2420.49	226.676	3	-5712.15	3273.21	3	-61.3951	529.414	3	0.0410882	0.0458084	4	0.174974	0.653915	4	0.692443	3.98153	4	1.54648	2.30911	4	-7.08	2.88507	18	-15.22	3.45211	18
	-1544.05	837.607	3	-1178.56	1103.81	3	821.957	860.953	3	1214.11	590.586	3	-2040	6119.3	3	5060	698.594	3	-0.121229	0.135156	4	0.0617247	0.230679	4	0	0	3	0.03	0.0447942	3	-12.04	4.90626	18	-15.22	3.45211	18
	-27659.6	2920.59	3	-19692.3	1592.44	3	26436.6	3571.72	3	20646.2	1492.98	3	-4180	12538.6	3	1540	1460.7	3	-0.121229	0.135156	4	-0.123449	0.461357	4	0	0	3	0.05	0.074657	3	-4.96	2.02118	21	-10.09	2.28855	21
													2799.24	1473.96	20	6964.24	2472.92	20	-0.121229	0.135156	4	0.123449	0.461357	4	1.3785	1.03016	6	3.2243	3.54833	6	-109	44.4171	4	-121	27.4445	4
													974.532	469.466	3	1843.01	320.759	3	116	129.326	6	-9	33.6349	6	1.3785	1.03016	6	2.80374	2.51817	6	-109	44.4171	4	-119	26.9909	4
													-558.335	748.746	3	90.9264	382.259	3	157.557	48.6786	3	113.183	73.207	3	2.29429	0.870974	3	2.15286	0.816538	3	-109	44.4171	4	-138	31.3003	4
													-722.094	355.554	3	35.5494	98.4044	3	155.827	23.0327	3	112.446	45.444	3	0.345714	0.108872	3	0.298571	0.0816538	3	-7	2.85247	6	-57	12.9284	6
													30.7693	92.2972	1	-12.0403	11.4761	1	26.091	4.51266	3	36.8004	16.1831	3	0.0587703	0.337928	3	0.0698334	0.104271	3	-8.1	1.2	3	-13.1	0.8	3
													-1222.99	291.57	3	953.912	1166.16	3	54.7059	60.9905	3	0	0	3							-8.1	1.2	3	-13.1	0.8	3
																			57.3529	63.9416	3	0	0	3							-20.4	2.3	3	-28.4	3.2	3
																			42.7397	33.5547	6	15.6164	21.475	6							7.1	1.3435	3	-26	5.65685	3
																			42.7397	33.5547	6	16.1644	14.764	6							14.2	1.90919	3	-26.3	4.6669	3
																			21.18	2.25167	3	9.06	0.952628	3							-37.6264	4.42144	6	-45.2227	4.41319	6
																			13.53	1.59349	3	3.23	0.744782	3							-37.6264	4.42144	6	-55.7757	3.84013	6
																			9.75292	10.6162	20	0.0153628	0.605445	20							0	0	20	-15	3.40221	20
																			224.954	27.3008	3	41.2194	28.2481	3							-1	0.407496	3	-20	4.53628	3
																			493.106	526.283	3	78.7221	80.0451	3							-1	0.407496	3	-20	4.53628	3
																			119.519	34.8241	3	20.1199	3.77863	3							-18.7287	0.97568	3	-28.7695	0.91964	3
																			230.5	197.031	3	118.907	159.666	3							-11.1423	0.601359	3	-18.0273	0.60993	3
																			158.063	156.238	3	533.279	463.453	3							9.60943	0.824727	3	0.242424	0.325066	3
																			78.7367	27.5971	8	125.204	186.104	8							0	0	8	-20	4.53628	8
																			507.984	309.251	8	12.7651	23.8124	4							-40.5187	20.3702	6	-50.3513	17.9575	6
																			434.706	437.349	5	15.2941	15.1263	5							-40.5187	20.3702	6	-50.4495	14.6613	6
																			434.706	437.349	5	78.8235	78.92	5							8.68885	0.945968	8	-10.5442	3.10953	8
																															-8.1	1.2	3	-13.1	0.8	3
																															6	22	5	-14	23	5
																															6	22	5	-39	15	5
Mean	-14703.4	4267.52	10	-11554.6	3746.96	10	13615.5	3708.78	10	12377.2	2691.31	10	-1656.37	769.851	16	1376.3	1281.84	16	152.346	30.1238	31	60.5725	19.7135	31	0.755619	0.187552	15	1.54359	0.455455	15	-23.3571	5.54047	34	-43.6038	5.9841	34
1-10	-10940.7	3587.52	3	-1303.69	1460.7	3	12157	3352.78	3	7583.16	4282.3	3	-2080	200	4	-720	580	4	155.93	91.89	3	-0.52095	0.420619	3	0.0932169	0.205535	3	1.16346	0.389226	3	-6.17	1.6	3	-32.34	1.06	3
	-11180.6	6822.77	3	-2014.79	1143.15	3	12213.3	5829.31	3	13236.1	2169.8	3	1216.3	2060.91	3	6279.48	947.481	3	155.93	91.89	3	-0.613	0.526	3	0.109127	0.239511	3	1.87111	1.14387	3	-20.33	2.57	3	-32.34	1.06	3
	-7369.27	746.959	3	-3516.01	4890.16	3	11939.3	4483.71	3	16131.5	7799.71	3	1032.65	1588.59	3	11221.3	1545.63	3	155.93	91.89	3	-0.35	0.701	3	0.109127	0.239511	3	0.267302	0.160211	3	-6.17	1.6	3	-40	0	3
	-7939.27	2111.97	3	-3674.03	3492.97	3	12286.1	4228.11	3	22335.9	5098	3	4570.03	2072.51	3	12615.5	3401.87	3	77.6798	41.1094	3	1.31787	0.996826	3	1.81938	10.4614	3	1.43821	2.14745	3	-6.17	1.6	3	-14.4755	3.48287	3
	-9369.26	2035.72	3	-2299.23	2342.63	3	12061.2	2723.47	3	11429.9	4226.87	3	4346.82	1600.24	3	18661.8	3804.37	3	80.9305	80.9275	3	-0.14922	1.92423	3	1.10722	6.36652	3	6.6686	9.95714	3	-20.33	2.57	3	-40	0	3
	-9754.42	3932.13	3	-2761.45	1692.92	3	12245.3	3757.31	3	17331	2585.94	3	2691.94	1470.9	3	9130.66	1617.11	3	80.9305	80.9275	3	2.50126	2.38319	3	0.53232	3.06082	3	2.10397	3.14153	3	-20.33	2.57	3	-14.4755	3.48287	3
	-17643	3122.52	3	-18545.3	1220.59	3	12121	2737.69	3	14804.6	2182.17	3	2490.89	1134.54	3	14569.5	1911.41	3	76.5986	97.385	3	1.28814	5.04394	3	0.584802	3.3626	3	2.82505	4.2182	3	-47	6.8	3	-82	12.3	3
	-16723.6	2362.8	3	-16792.7	2297.57	3	10565.6	3177.88	3	13251	2768.3	3	-5522.05	3799.05	3	-3740.72	3396.35	3	3.31045	3.22256	3	0.972568	5.00563	3	0.0722617	0.415503	3	1.56147	2.3315	3	-56	10.1	3	-91	11.3	3
	-13221.3	5835.69	3	-13858	8055.43	3	9278.44	3665.3	3	8910.19	4926.31	3	-6157.98	2847.63	3	-3541.64	2451.05	3	69.1892	105.74	3	0.20126	3.76732	3	1.068	6.14097	3	1.97459	2.94833	3	-44	6.8	3	-79	12.3	3
	-12433.2	4080.1	3	-12839.1	6079.75	3	8581.22	3466.47	3	7630.77	3659.78	3	-3942.85	3165.22	3	-4947.83	674.984	3	69.1892	105.74	3	3.60831	8.77628	3	0.352375	2.02615	3	2.90729	4.34099	3	-50	6.8	3	-85	12.3	3
	-129103	31476.7	1	-116380	43324.7	1	136437	39242.9	1	134603	35318.7	1	-3852.02	1523.88	3	-5208.29	1132.68	3	3.35183	3.21266	3	0.157107	2.94067	3	0.23227	1.33555	3	3.19393	4.76898	3	-45.68	4.84282	3	-80.65	8.74079	3
	-130313	31771.8	1	-121147	45099.2	1	132953	38241	1	128553	33731.3	1	7663.33	22987.4	1	18223.3	17369.4	1	3.35183	3.21266	3	2.81671	12.1107	3	0.0727753	0.418456	3	1.91761	2.86326	3	-53.36	6.39862	3	-88.3	8.32241	3
	-120743	29438.5	1	-111613	41550.2	1	136987	39401.1	1	130093	34135.3	1	2640	7919.09	1	7406.67	7059.61	1	4.92557	6.48384	3	4.36152	5.03476	3	0.31635	1.819	3	3.54269	5.28973	3	-47	6.8	3	-82	12.3	3
	-3247.74	576.551	3	-2538.13	178.152	3	4869.5	764.579	3	4268.1	956.61	3	16243.3	48724.4	1	18480	17614.1	1	6.95868	1.15326	3	1.1759	1.45647	3	0.0216785	0.124651	3	1.41952	2.11955	3	-56	10.1	3	-91	11.3	3
	-4239.56	1115.02	3	-3364.95	1102.25	3	7477.34	1843.72	3	5971.03	1963.46	3	1621.76	1098.32	3	1729.97	370.594	3	9.95273	3.61094	3	1.45577	2.25239	3	0.0628234	0.361233	3	2.46823	3.68541	3	-44	6.8	3	-79	12.3	3
	-2887.69	116.061	3	-2017.07	715.266	3	2301.58	97.8987	3	2420.49	564.274	3	3237.78	1588.21	3	2606.08	272.81	3	10.2412	7.09379	3	0.961562	1.17811	3	2.00132	11.5076	3	3.11612	4.6528	3	-50	6.8	3	-85	12.3	3
	-2413.6	229.444	3	-1974.45	445.589	3	3307.46	917.365	3	2946	650.639	3	-586.112	363.92	3	403.429	463.613	3	7.13752	3.96335	3	3.05393	2.94879	3	2.05627	11.8235	3	3.95948	5.91205	3	-45.68	4.84282	3	-80.65	8.74079	3
	-998.699	642.031	3	-1433.38	1186.71	3	688.15	827.81	3	910.581	867.05	3	893.864	1145.19	3	971.546	320.497	3	8.40299	3.18738	3	1.07945	0.9606	3	0.144523	0.831006	3	2.27124	3.39127	3	-53.36	6.39862	3	-88.3	8.32241	3
	-757.078	753.461	3	-1751.91	1655.7	3	764.611	794.728	3	1696.18	1486.73	3	-310.549	752.083	3	-522.801	196.666	3	29.8775	10.5769	3	21.2484	3.45421	3	0.251294	1.44493	3	2.71505	4.05395	3	-5.83333	5.33854	4	-19.5	4.06202	4
	-3659.96	593.485	3	-2778.65	942.718	3	6251.17	266.977	3	7838.28	2291.05	3	7.53274	385.9	3	-55.7311	131.304	3	24.519	3.85853	3	2.714	1.82043	3	1.07574	6.1855	4	1.01035	1.5086	4	-17.5	4.94975	4	-34	11.3137	4
	-4810.23	507.91	3	-5079.11	317.388	3	4762.05	997.805	3	6143.13	1144.58	3	2591.21	1600.55	3	5059.64	1113.54	3	37.001	14.2297	3	17.569	3.32601	3	0.0429261	0.246824	46	38.026	56.7781	66	-10	5.65685	4	-16.5	3.53553	4
	-1686.2	951.524	3	-4019.34	183.636	3	2652.48	1183.12	3	3491.73	187.138	3	-48.1792	1897.39	3	1064.02	385.191	3	29.018	28.4589	3	44.106	9.75645	3	1.1	6.32497	3	5.18571	7.74299	3	10	14.1421	4	-8	2.82843	4
	-7900.04	1770.2	3	-3744.71	2032.4	3	12362.9	2275.27	3	15082.7	2876.42	3	966.284	2670.81	3	-527.613	119.076	3							1.1	6.32497	3	1.88571	2.81563	3	22	8.96492	3	-35	7.93849	3
	-10050.8	1612.55	3	-12603.4	2731.15	3	9984.97	333.566	3	15408.3	3231.81	3	4462.89	2118.44	3	11338	1981.84	3													18	7.33494	3	-25	5.67035	3
	-3420.21	2581.35	3	-7240.46	1430.82	3	3050.27	3364.46	3	7768.13	631.537	3	-65.8217	2444.11	3	2804.95	528.035	3													14	5.70495	3	-31	7.03124	3
	-252.976	61.6782	1	-259.329	96.5401	1	243.003	69.8942	1	278.682	73.1236	1	-369.935	430.23	3	527.664	650.282	3													8	3.25997	3	-30	6.80442	3
	-1190.89	8.17281	4	-1647.11	42.2133	4	1173.65	59.3123	4	1113.34	77.0302	4	-9.97348	29.917	1	19.3526	18.4458	1													55	22.4123	3	-30	6.80442	3
	-1587.86	7.47228	4	-1598.67	44.3367	4	1001.9	31.5355	4	1031.87	95.9155	4	-17.2407	1.89941	4	-533.774	650.201	4													45	18.3373	3	-32	7.25805	3
	-1541.16	7.23877	4	-2325.33	61.9656	4	1345.41	87.6958	4	1031.87	302.961	4	-585.96	247.144	4	-566.793	690.439	4													37	15.0774	3	-39	8.84575	3
	-2129.6	6.82564	4	-2860.46	83.0417	4	1355.54	118.505	4	1460.5	101.186	4	-195.75	14.3335	4	-1293.46	1575.6	4													24	9.77991	3	-36	8.16531	3
	-2259.29	13.6513	4	-1940.01	56.0709	4	1857.59	103.363	4	1587.5	105.691	4	-774.063	326.742	4	-1399.96	96.0056	4													60	24.4498	3	-38	8.61893	3
	-13417.4	2514	3	-10261.1	928.26	3	12328	1844.65	3	10779.5	1426.08	3	-401.699	32.1727	4	-352.516	429.437	4													41	16.7074	3	-31	7.03124	3
	-17995	1848.15	3	-2054.55	2813.75	3	11579.7	6378.08	3	3447.39	3117.48	3	-1089.44	396.381	3	518.321	639.041	3													65	26.4873	3	-38	8.61893	3
	-131193	31986.3	1	-154037	57343.1	1	146923	42259.2	1	176367	46277.1	1	-6415.32	6104.44	3	1392.84	1342.19	3													50	20.3748	3	-34	7.71168	3
	-138600	33792.1	1	-152680	56838	1	150003	43145.1	1	173837	45613.2	1	15730	47184.6	1	22330	21283.7	1													15	6.11245	3	-35	7.93849	3
	-135483	33032.3	1	-150663	56087.3	1	139810	40213.2	1	166357	43650.5	1	11403.3	34206.1	1	21156.7	20165.3	1													17	6.92744	3	-37	8.39212	3
	-51700	12605	1	-15510	5773.89	1	39196.7	11274	1	35236.7	9245.79	1	4326.67	12978.5	1	15693.3	14958	1													43	17.5223	3	-31	7.03124	3
	-52030	12685.5	1	-33366.7	12421.4	1	53753.3	15460.9	1	42936.7	11266.2	1	-12503.3	37505.7	1	19726.7	18802.3	1													40	16.2999	3	-30	6.80442	3
	-51700	12605	1	-15510	5773.89	1	39196.7	11274	1	35236.7	9245.79	1	1723.33	5169.41	1	9570	9121.58	1	-0.528	0.588656	4	-0.261333	0.976659	4							-76	30.9697	4	-84	19.0524	4
	-52030	12685.5	1	-33366.7	12421.4	1	53753.3	15460.9	1	42936.7	11266.2	1	-12503.3	37505.7	1	19726.7	18802.3	1	20.3724	47.0833	3	23.1893	55.9066	3							-14.0415	3.86183	3	-37.9121	6.28467	3
	-51700	12605	1	-15510	5773.89	1	39196.7	11274	1	35236.7	9245.79	1	1723.33	5169.41	1	9570	9121.58	1	463.275	273.827	10	96.9548	59.1584	10							-8	3.25997	3	-11	2.49495	3
	-52030	12685.5	1	-33366.7	12421.4	1	53753.3	15460.9	1	42936.7	11266.2	1	-12503.3	37505.7	1	19726.7	18802.3	1	576.058	329.182	4	132.211	124.136	4							-8	3.25997	3	-19	4.30947	3
													1723.33	5169.41	1	9570	9121.58	1	70.8246	78.9608	46	-0.125893	0.470489	66							-20.4	2.3	3	-28.4	3.2	3
																			4.34491	9.59618	6	-0.161156	0.558219	6							3	3	10	4	2	10
																			4.34491	9.59618	6	-0.0537186	0.539887	6							3	3	10	4	2	10
																			4.34491	9.59618	6	0.0537186	0.43312	6							-15	13	9836	-68	23	11052
																			4.34491	9.59618	6	0.0537186	0.43312	6							-24.4	9.94291	1	-83.7	18.9843	1
																			27.5178	12.1376	6	-0.161156	0.561029	6							-24.4	9.94291	1	-49.1	11.1366	1
																			27.5178	12.1376	6	-0.0537186	11.6654	6							-24.4	9.94291	1	-63.8	14.4707	1
																			27.5178	12.1376	6	0.0537186	1.49411	6							-24.4	9.94291	1	-34.4	7.8024	1
																			27.5178	12.1376	6	0.0537186	0.43312	6							-24.4	9.94291	1	-83.7	18.9843	1
																			17.621	25.0607	6	-0.161156	0.561029	6							-24.4	9.94291	1	-49.1	11.1366	1
																			17.621	25.0607	6	-0.0537186	0.539887	6							-24.4	9.94291	1	-63.8	14.4707	1
																			17.621	25.0607	6	0.0537186	0.43312	6							-24.4	9.94291	1	-34.4	7.8024	1
																			17.621	25.0607	6	0.0537186	0.43312	6							-24.4	9.94291	1	-83.7	18.9843	1
																			3.03325	6.954	6	0.0537186	0.486467	6							-24.4	9.94291	1	-49.1	11.1366	1
																			3.03325	10.1267	6	-0.107437	0.270438	6							-24.4	9.94291	1	-63.8	14.4707	1
																			3.03325	10.1267	6	-0.107437	0.391199	6							-24.4	9.94291	1	-34.4	7.8024	1
																			3.03325	10.1267	6	-0.0537186	0.379879	6							-20.8	8.47593	1	-48.2	10.9324	1
																			11.6275	19.9193	6	0.0537186	0.486467	6							-20.8	8.47593	1	-46	10.4334	1
																			11.6275	19.9193	6	-0.107437	0.289448	6							-20.8	8.47593	1	-40	9.07256	1
																			11.6275	19.9193	6	-0.107437	0.391199	6							-20.8	8.47593	1	-31.5	7.14464	1
																			11.6275	19.9193	6	-0.0537186	0.379879	6							-20.8	8.47593	1	-48.2	10.9324	1
																			13.1441	20.2854	6	0.0537186	0.486467	6							-20.8	8.47593	1	-46	10.4334	1
																			13.1441	20.2854	6	-0.107437	0.289448	6							-20.8	8.47593	1	-40	9.07256	1
																			13.1441	20.2854	6	-0.107437	0.391199	6							-20.8	8.47593	1	-31.5	7.14464	1
																			13.1441	20.2854	6	-0.0537186	0.391199	6							-20.8	8.47593	1	-48.2	10.9324	1
																			0.252771	2.03976	6	-0.161156	0.561029	6							-20.8	8.47593	1	-46	10.4334	1
																			0.252771	2.03976	6	-0.161156	0.561029	6							-20.8	8.47593	1	-40	9.07256	1
																			0.252771	2.03976	6	-0.161156	0.509829	6							-20.8	8.47593	1	-31.5	7.14464	1
																			0.252771	2.03976	6	-0.214874	0.529426	6							-48.7	19.8451	1	-77.6	17.6008	1
																			1.26385	3.78274	6	-0.161156	0.561029	6							-48.7	19.8451	1	-119.3	27.0589	1
																			1.26385	3.78274	6	-0.161156	0.561029	6							-48.7	19.8451	1	-85.1	19.3019	1
																			1.26385	3.78274	6	-0.161156	0.561029	6							-48.7	19.8451	1	-90	20.4133	1
																			1.26385	3.78274	6	-0.214874	0.529426	6							-48.7	19.8451	1	-77.6	17.6008	1
																			0.758313	2.17535	6	-0.161156	0.561029	6							-48.7	19.8451	1	-119.3	27.0589	1
																			0.758313	2.17535	6	-0.161156	0.561029	6							-48.7	19.8451	1	-85.1	19.3019	1
																			0.758313	2.17535	6	-0.161156	0.529426	6							-48.7	19.8451	1	-90	20.4133	1
																			0.758313	2.17535	6	-0.214874	0.529426	6							-48.7	19.8451	1	-77.6	17.6008	1
																			319.739	43.9304	3	51.7113	35.1389	3							-48.7	19.8451	1	-119.3	27.0589	1
																			231.159	29.8494	3	36.3221	24.7837	3							-48.7	19.8451	1	-85.1	19.3019	1
																			806.569	856.382	3	84.6274	85.5251	3							-48.7	19.8451	1	-90	20.4133	1
																			660.575	706.607	3	60.9462	61.8333	3							-1	0.407496	3	-20	4.53628	3
																			756.954	966.524	3	140.839	231.797	3							-1	0.407496	3	-20	4.53628	3
																			99.5992	34.5002	3	2.01199	4.1126	3							-1	0.407496	3	-20	4.53628	3
																			1089.64	927.79	3	639.124	304.357	3							-1	0.407496	3	-20	4.53628	3
																			146.682	127.237	3	29.7267	18.9234	3							-15.9107	1.02278	3	-23.4539	1.19619	3
																			1422.57	1619.31	3	1233.21	527.22	3							-11.5958	0.449548	3	-23.2087	0.781013	3
																			87.813	511.89	3	83.3248	58.0452	3							-7.50498	0.561476	3	-14.8862	0.594753	3
																			193.622	614.147	8	-17.3994	20.7273	8							-5.97271	0.389936	3	-14.6078	0.447359	3
																			13.001	49.0212	8	-4.32353	9.62287	8							10.7344	0.899078	3	1.41533	0.519516	3
																			92.5362	343.166	8	-4.32353	4.23689	8							21.8788	1.10818	3	0.768375	1.271	3
																			118.267	131.853	1	26.1333	97.6659	1							-17.5	4.94975	4	-34	11.3137	4
																															-10	5.65685	4	-16.5	3.53553	4
																															10	14.1421	4	-8	2.82843	4
																															-17.5	4.94975	4	-34	11.3137	4
																															-10	5.65685	4	-16.5	3.53553	4
																															10	14.1421	4	-8	2.82843	4
																															-22.8356	9.30542	8	-45.1873	10.2491	8
																															-45.6479	18.6014	8	-90.9915	20.6381	8
																															-18.9124	7.70674	8	-40.306	9.14197	8
																															-18.4398	7.46607	6	-32.9269	5.91818	6
																															-18.4398	7.46607	6	-40.3671	4.08436	6
																															-25.3276	3.72169	6	-38.1387	2.9417	6
																															-25.3276	3.72169	6	-44.8709	2.27024	6
																															-48.7617	3.88447	6	-60.4537	3.57114	6
																															-48.7617	3.88447	6	-64.1947	3.05034	6
																															-20.4	2.3	3	-28.4	3.2	3
																															-15.2419	0.798346	3	-86.7473	35.7418	3
																															-45.3	5.71577	3	-60.2	4.67654	3
																															-45.3	5.71577	3	-27.4	4.50333	3
																															-22	8.96492	1	-77	17.4647	1
																															-17	6.92744	1	-73	16.5574	1
																															-11	4.48246	1	-59	13.382	1
																															-7.6	3.09697	1	-66.4	15.0605	1
Mean	-30944	6865.78	42	-26244	7108.58	42	31542.1	7317.66	42	32658.3	7913.11	42	543.527	891.508	43	6248.44	1269.98	43	111.524	28.7511	77	35.3219	18.0518	77	0.622861	0.13775	23	4.0649	1.57081	23	-16.5811	2.60217	115	-48.2478	2.67111	115
10-30	-9117.23	2424.32	3	-11061.6	1546.86	3	12663.5	2211.91	3	13557.8	1534.78	3	-2080	200	4	-1200	800	4	155.93	91.89	3	-0.5015	0.69632	3	0.0932169	0.205535	3	1.61772	0.538782	3	-31.375	10.768	4	-57.38	9.45	4
	-10940.7	3587.52	3	-13155.4	4763.14	3	12157	3352.78	3	16131.5	7799.71	3	3546.29	5941.72	3	2496.18	441.866	3	155.93	91.89	3	-0.964	0.263	3	0.109127	0.239511	3	1.63054	0.966164	3	-6.17	1.6	3	-37.89	1.4	3
	-11180.6	6822.77	3	-13708.5	4128.05	3	12213.3	5829.31	3	16774.9	6880.91	3	1216.3	2060.91	3	2976.06	692.554	3	155.93	91.89	3	0.35	1.927	3	0.109127	0.239511	3	2.11168	0.984942	3	-20.33	2.57	3	-37.89	1.4	3
	-7247.13	2100.96	3	-4582.66	1206.66	3	6440.29	2181.35	3	24633.8	2489.53	3	1032.65	1588.59	3	3066.4	896.277	3	77.6798	41.1094	3	-1.09987	0.821474	3	-0.101835	0.063291	3	2.96318	0.679484	3	-6.17	1.6	3	-40	0	3
	-7369.27	746.959	3	-4661.67	1270.17	3	11939.3	4483.71	3	23301	3584.45	3	-806.838	461.405	3	20051.1	2691.2	3	80.9305	80.9275	3	-2.9015	2.23862	3	-0.0146	0.088257	3	0.007884	0.0498225	3	-6.17	1.6	3	-31.7101	5.4726	3
	-7939.27	2111.97	3	-4859.2	1397.19	3	12286.1	2603.85	3	23071.2	3447.71	3	4570.03	2072.51	3	18639.3	3134.05	3	80.9305	80.9275	3	1.14015	0.605658	3	-0.0963265	0.0540294	3	1.54547	0.289318	3	-20.33	2.57	3	-40	0	3
	-8294.39	1642.47	3	-7951.71	991.199	3	9925.3	1567.01	3	18874.3	1436.98	3	4346.82	1600.24	3	18212	4028.23	3	382.1	116.458	9	31.0351	65.3585	9	-0.404403	1.16002	24	0.414401	1.31789	15	-20.33	2.57	3	-31.7101	5.4726	3
	-9369.26	2035.72	3	-9078.41	2550.77	3	12061.2	2723.47	3	19572.8	4405.7	3	1456.79	3333.55	3	10922.6	1312.05	3	60.9422	16.4004	12	31.0351	65.3585	12	0.0227857	0.131017	3	2.10571	3.14412	3	-38	7.6	3	-112	15.2	3
	-9754.42	3932.13	3	-9460.83	2248.91	3	12245.3	3459.62	3	19797.1	3942.24	3	2691.94	1470.9	3	10494.4	1546.85	3	76.5986	97.385	3	-0.990878	2.11119	3	0.0534286	0.307213	3	0.0579857	0.0865808	3	-47	6.8	3	-120	11.8	3
	-9117.23	2424.32	3	-11061.6	12004.4	3	12663.5	2011.76	3	13557.8	1534.78	3	2490.89	1134.54	3	10336.3	1988.93	3	3.31045	3.22256	3	-0.748129	2.05654	3	0.0191714	0.110235	3	0.0306429	0.0457541	3	-56	10.1	3	-128	14.2	3
	-10940.7	3587.52	3	-13155.4	5176.94	3	12157	3352.78	3	16499.1	2145.49	3	3546.29	5941.72	3	2496.18	441.866	3	69.1892	105.74	3	-2.34325	2.17251	3	0.0545286	0.313538	3	0.0358286	0.0534971	3	-38	7.6	3	-112	15.2	3
	-7247.13	2100.96	3	-4582.66	1321.56	3	6440.29	2181.35	3	24633.8	2489.53	3	1216.3	2060.91	3	3343.73	717.823	3	69.1892	105.74	3	1.96948	4.47045	3	0.32108	0.194946	18	0.697519	0.315144	18	-44	6.8	3	-116	11.8	3
	-7369.27	746.959	3	-4661.67	1389.64	3	11939.3	4483.71	3	23301	3584.45	3	-806.838	1429.05	3	20051.1	2691.2	3	3.35183	3.21266	3	-1.82918	1.6562	3	0.2	0.519615	3	0.9	1.03923	3	-50	6.8	3	-120	11.8	3
	-8294.39	1642.47	3	-8210.87	6747.56	3	9925.3	1480	3	18431.2	1392.33	3	4570.03	7489.89	3	18639.3	3134.05	3	3.35183	3.21266	3	1.53741	3.47621	3	1	1.58114	10	11	13.914	10	-38	5.41257	3	-112	10.7566	3
	-9369.26	2035.72	3	-9418.16	2962.86	3	12061.2	2723.47	3	19491.9	1982.67	3	1630.91	3386.26	3	10220.4	1209.71	3	218.59	226.197	25	-1.37308	0.504914	75	1	1.58114	10	6	8.53815	10	-45.68	4.84282	3	-118.08	8.35053	3
	-39843.5	12909.5	66	-47094.8	13325.7	66	35408.6	12878.7	66	52464.1	12723.4	66	2691.94	3491.8	3	10073.8	1436.38	3	5.38669	4.26802	3	2.69388	4.34476	3	0.878429	0.161857	4	24.849	0.655286	4	-53.36	6.39862	3	-124.16	9.30615	3
	-128773	31396.3	1	-118947	44280.2	1	127783	36754	1	122870	32240	1	-4434.92	891.261	66	5369.32	3960.99	66	4.92557	6.48384	3	2.5656	2.16779	3	1.18009	0.736183	2	0.916363	0.556738	6	-38	7.6	3	-112	15.2	3
	-270.833	66.032	1	-301.007	112.056	1	252.07	72.5022	1	294.164	77.186	1	2000	5999.31	3	-6800	6481.37	3	6.95868	1.15326	3	1.09038	2.18227	3	0.0047842	0.0576517	3	2.86685	1.86115	3	-47	6.8	3	-120	11.8	3
	-241.071	58.7757	1	-271.678	101.137	1	217.614	62.5918	1	295.884	77.6374	1	-990	2969.66	1	3923.33	3739.5	1	10.8663	5.33941	3	1.22478	3.4038	3	0.0291212	0.0686594	3	0.105118	0.107406	3	-56	10.1	3	-128	14.2	3
	-134383	32764.1	1	-148133	55145.5	1	136253	39190.2	1	161810	42457.5	1	-1484.7	4453.59	1	390.71	372.403	1	9.95273	3.61094	3	1.00454	1.23918	3	0.047842	0.0441064	3	0.828201	0.596625	3	-38	7.6	3	-112	15.2	3
	-160161	10636.5	3	-207277	21272.6	3	67306.6	13632.7	3	144421	24745.8	3	-1316.39	3948.73	1	54.0984	51.5635	1	10.2412	7.09379	3	0.456608	1.53139	3	0.270411	0.176375	3	1.01932	0.853637	3	-44	6.8	3	-116	11.8	3
	-160161	10636.5	3	-129453	6791.91	3	67306.6	13632.7	3	78968.1	7711.6	3	-1484.7	4453.59	1	847.541	807.828	1	7.7977	3.35141	3	1.98871	2.78814	3							-50	6.8	3	-120	11.8	3
													-2037.7	6112.41	1	-571.038	544.281	1	7.13752	3.96335	3	1.81629	1.27456	3							-38	5.41257	3	-112	10.7566	3
													-18.7634	56.2836	1	-6.84293	6.52229	1	8.40299	3.18738	3	0.786169	1.35205	3							-45.68	4.84282	3	-118.08	8.35053	3
													-23.4571	70.3631	1	24.2062	23.072	1	256	285.409	3	-0.4	1.49489	3							-53.36	6.39862	3	-124.16	9.30615	3
													1870	5609.36	1	13676.7	13035.8	1	78.6667	87.7038	3	34.6667	129.557	3							-38	7.6	3	-112	15.2	3
													-92854.6	8527.39	3	-62856.8	12642.4	3	17.1	7.96743	3	11.1	4.33013	3							-47	6.8	3	-120	11.8	3
													-92854.6	8527.39	3	-50485.3	3652.22	3	17.3	8.14064	3	12.5	5.02295	3							-38	7.6	3	-112	15.2	3
																			29.565	10.6773	3	7.99188	0.8736	3							-44	6.8	3	-116	11.8	3
																			142.076	118.227	24	1.34264	1.8695	15							-38	5.41257	3	-112	10.8251	3
																			277.333	309.193	3	0.04	0.149489	3							-45.68	4.84282	3	-118.24	8.40372	3
																			100.8	112.38	3	1.06667	3.98636	3							-2.8	0.72	3	-23.33	3.46	3
																			24	26.7571	3	7.86667	29.3994	3							-11.68	1.82	3	-20.88	1.28	3
																			59.4667	66.2982	3	27.3333	102.151	3							3.33333	1.52753	3	-18.1	5.6	3
																			319.225	121.193	18	5.4661	11.3953	18							6.52	6.22	4	-36.47	14.77	4
																			106	76.5566	3	1	2.07846	3							-27.34	6.04	3	-42.07	2.04	3
																			51	61.032	3	1	5.6921	10							-2.62	0.79	3	-21.88	3.76	3
																			101	133.448	3	17	24.982	10							-10.75	1.853	3	-20.14	1.87	3
																			1.36508	1.12698	4	-0.0238095	0.047619	4							-6.95	1.41	3	-21.5	1.76	3
																			-3.47023	1.96453	10	5.03661	17.8738	10							-12.04	4.90626	18	-24.07	5.45941	18
																			-5.20534	2.21819	4	-1.25915	2.6243	4							-6.89273	1.33282	3	-25.7648	2.38063	3
																			34.7023	38.6889	10	27.7014	103.526	10							-0.59	1.75	4	-17.33	1.8	4
																			102.017	83.3458	2	0.614194	11.8696	6							-2.05	1.38	4	-21.37	1.45	4
																			93.1	103.795	18	32.8	122.581	18							-10	23	4	-56	34	4
																			57.9	64.5515	18	31.7	118.47	18							-19	4	10	-17	7	10
																			78.1	87.0721	17	34.9	130.429	18							-19	4	10	-17	7	10
																			43.6	48.6087	18	14.1	52.6947	18							-16	0.7	2	-44	14	6
																			19.7	21.9631	18	10.7	39.9882	18							-11	4.48246	3	-23	5.21672	3
																			68	56.9828	4	16	88.274	4							-11	4.48246	3	-23	5.21672	3
																			68	56.9828	4	40	220.685	4							-15	6.11245	3	-20	4.53628	3
																			441.333	369.829	4	0	0	4							-15	6.11245	3	-20	4.53628	3
																			94.0395	104.843	1	47.8505	178.828	1							-12	4.88996	3	-14	3.1754	3
																			84.0706	93.7286	1	46.8536	175.102	1							-12	4.88996	3	-14	3.1754	3
																			100.353	111.882	1	50.1765	187.521	1							-22	8.96492	3	-31	7.03124	3
																			434.706	437.349	5	225.588	225.58	5							-22	8.96492	3	-31	7.03124	3
																			26.0514	12.5158	3	-2.27906	1.8593	3							-2	0.814993	3	-30	6.80442	3
																			118.267	131.853	1	58	216.759	1							-2	0.814993	3	-30	6.80442	3
																			115.067	128.285	1	63.3333	236.69	1							-20	8.14993	3	-36	8.16531	3
																			105.2	117.285	1	45.4667	169.919	1							-20	8.14993	3	-36	8.16531	3
																			115.067	128.285	1	31.7333	118.594	1							-16	6.51994	3	-43	9.753	3
																			105.2	117.285	1	29.7333	111.12	1							-16	6.51994	3	-21	4.7631	3
																															-16	6.51994	3	-21	4.7631	3
																															-4	1.62999	3	-31	7.03124	3
																															-21	8.55742	3	-38	8.61893	3
																															0	0	3	-50	11.3407	3
																															-4	1.62999	3	-31	7.03124	3
																															-21	8.55742	3	-38	8.61893	3
																															0	0	3	-50	11.3407	3
																															-7.2	5.7	18	-22.1	8.6	18
																															-10.3	8	18	-20.6	9.7	18
																															-7.1	4.7	17	-11.8	6.6	18
																															-12.6	7.6	18	-18	8.5	18
																															-17.1	5.2	18	-28.9	7.5	18
																															-16	6.51994	4	-21	4.7631	4
																															-15	6.11245	4	-20	4.53628	4
																															-2	0.814993	4	-30	6.80442	4
																															6	22	5	-21	18	5
																															10	4.07496	1	-45	10.2066	1
																															-5.61497	0.897612	3	-132.257	8.67181	3
																															-5.61497	0.897612	3	-65.2351	10.1775	3
																															-7.6	3.09697	1	-20.2	4.58164	1
																															-2.4	0.977991	1	-23.2	5.26209	1
																															-4.8	1.95598	1	-19	4.30947	1
																															-2.4	0.977991	1	-61.5	13.9491	1
																															-4.8	1.95598	1	-58.5	13.2686	1
Mean	-34426.6	11647.2	22	-35504	12447.2	22	27347.5	8148.6	22	38761.5	9751.87	22	-5797.02	4666.44	28	2299.46	3459.25	28	90.8577	13.0877	61	16.4695	4.16887	61	0.227428	0.0915484	21	2.93826	1.2255	21	-19.8356	1.90241	85	-56.0882	4.52029	85
30-50	-30804.4	7508.69	48	-22424.6	7078.09	48	25786.5	7450.75	48	34101.6	6764.05	48	8950.33	4633.11	6	19004.3	11808.6	6	1212.3	324.686	9	4.80305	10.1006	9	0.028689	0.0472675	3	0.803	0.225132	3	11.41	3.12165	4	-91.8	9.7	4
	-16584.2	3505.6	57	-16893.3	9325.42	57	12315.9	3346.19	57	11148.6	2042.05	57	-5017.91	931.026	48	11677	2084.92	48	2106.5	550.27	12	-0.369466	0.858462	12	0.07373	0.0350765	3	0.0802635	0.028397	3	5.655	3.80894	4	-105	8.1	4
	-5163.66	1258.95	3	-11281.8	4199.85	3	3223.08	927.045	3	10128.9	2657.72	3	-4268.27	1045.12	57	-5744.72	9099.1	57	88	60.4722	6	-2	5.96285	6	0.0157143	0.0903568	3	1.02143	1.52514	3	-15.3	3.2	6	-47.7	6.2	6
	-6329	1543.08	3	-6508.75	2423	3	5111.97	1470.34	3	5566.42	1460.58	3	2000	5999.31	3	-6800	6481.37	3	131.4	146.495	3	38.8	145.004	3	0.0235714	0.135535	3	2.12143	3.16759	3	-9	3.66747	3	-15	3.40221	3
	-6329	1543.08	3	-4475.64	1666.14	3	5111.97	1470.34	3	5547.62	1455.65	3	2000	5999.31	3	-8000	7625.14	3	131.4	146.495	3	1.4	5.2321	3	0.0235714	0.135535	3	0.801429	1.19664	3	-9	3.66747	3	-21	4.7631	3
	-6053.29	1475.86	3	-11865.7	4417.24	3	4090.62	1176.58	3	9751.57	2558.73	3	2000	5999.31	3	-8000	7625.14	3	131.4	146.495	3	3.6	13.454	3	0.0157143	0.0903568	3	0.0172857	0.02581	3	-9	3.66747	3	-26	5.89717	3
	-8439.78	2057.71	3	-8092.57	3012.61	3	5436.64	1563.73	3	7258.53	1904.57	3	2000	5999.31	3	-2000	1906.29	3	580	646.63	3	0.533333	1.99318	3	0.0188571	0.108428	3	0.0204286	0.0305027	3	-5.04	1.83	3	-37.3	7.39	3
	-8439.78	2057.71	3	-6425.78	2392.12	3	5436.64	1563.73	3	7678.42	2014.75	3	2000	5999.31	3	-1999	1905.33	3	32	35.6761	3	14.6667	54.8125	3	0.0125714	0.0722854	3	0.0141429	0.0211173	3	-20.85	5.42	3	-21.08	7.29	3
	-5231.5	774.591	5	-7422.05	3514.83	5	4243.1	1520.75	5	7080.96	2727.09	5	25.2371	75.7027	3	227.91	217.23	3	326.667	364.194	3	-0.106667	0.398636	3	0.0125714	0.0722854	3	0.0141429	0.0211173	3	-27.34	6.04	3	-42.07	2.04	3
	-7616.01	1856.86	5	-11234.3	2636.97	5	7943.33	2284.72	5	12092.3	4450.75	5	826.516	2479.26	3	-2686.08	2560.22	3	93.0667	103.758	3	0.133333	0.498296	3	0.0919286	0.528587	3	0.870571	1.29988	3	-2.62	0.79	3	-21.88	3.76	3
	-13830.8	2274.67	3	-66220.4	9098.67	3	8766.07	227.467	3	41998.1	6824	3	-870.681	2611.74	3	-911.638	868.922	3	24.1333	26.9058	3	8.4	31.3926	3	0.240429	1.38246	3	0.883143	1.31866	3	-6.51	2.28	3	-46.73	5.78	3
	-32633.3	3600	3	-65926.7	5926	3	30690	3652	3	61160	6593	3	82.0207	246.034	3	-4541.91	4329.09	3	50.8	56.6359	3	28.1333	105.14	3	0.0477714	0.274685	3	0.216857	0.323798	3	-10.75	1.853	3	-20.14	1.87	3
	-36630	4321	3	-75753.3	7859	3	33953.3	4126	3	64753.3	9463	3	-1940.58	5821.09	3	-1152.9	1098.88	3	214.332	127.053	18	3.70133	11.1661	18	0.0847	0.487023	3	0.0616	0.0919774	3	-24.62	6.88	3	-23.22	6.41	3
	-38630	9418.4	1	-35990	880	1	37280	1760	1	35670	670	1	-1217.03	3650.68	3	-942.327	898.172	3	440.083	113.403	21	25.5501	18.734	21	0.619759	0.319372	18	1.25782	0.639591	18	-6.95	1.41	3	-21.5	1.76	3
													-1217.03	3650.68	3	1071.98	1021.75	3	122	57.8505	3	0	2.42487	3	0.634693	0.128564	21	0.777562	0.424217	21	-14.43	3.89	3	-28.3	4.55	3
													-1962.67	5887.33	3	-2114.15	2015.08	3	106	76.5566	3	4	4.15692	3	0.3	0.866025	3	0.7	0.866025	3	-27.34	6.04	3	-42.07	2.04	3
													-3003.14	9008.39	3	-834.035	794.955	3	122	57.8505	3	5	6.9282	3	0.2	0.519615	3	0.6	0.519615	3	-6.51	2.28	3	-46.73	5.78	3
													-3003.14	9008.39	3	1252.64	1193.95	3	106	76.5566	3	5	3.2909	3	0.3	0.866025	3	0.4	0.69282	3	-24.62	6.88	3	-23.22	6.41	3
													-988.397	1706.65	5	-341.083	4448.71	5	122	57.8505	3	16	12.2976	3	0.2	0.519615	3	0.3	0.519615	3	-14.43	3.89	3	-28.3	4.55	3
													327.323	2944.13	5	857.98	5173.28	5	244.124	272.168	4	190.384	711.506	6	0.3	0.866025	3	0.4	1.03923	3	-7.08	2.88507	18	-36.11	8.19026	18
													-4783.77	1766.98	3	-17987	3327.11	3	2.91752	16.5072	8	-0.303332	3.49392	8	-0.0688286	0.395763	4	0.19272	0.287758	4	-4.96	2.02118	21	-14.16	3.21169	21
													-1943.33	436	3	-4766.67	1203	3	11.7958	13.1509	3	0.268127	1.00205	3	9.3513	53.7698	3	12.2658	18.3146	3	-7.25457	1.35312	3	-28.5965	2.27856	3
													-2676.67	563	3	-11000	2602	3	14.6619	16.3462	3	4.25786	15.9125	3	10.4444	60.0552	3	19.2891	28.8013	3	-6.89273	1.33282	3	-20.42	3.03	3
													-1350	2670	1	-320	1110	1	5.10843	5.69529	3	-0.69713	2.60533	3	0.801429	0.190526	3	1.52429	0.353833	3	-7.25457	1.35312	3	-22.46	2.21	3
																			8.2133	9.15684	3	3.0352	11.3432	3	0.801429	0.190526	3	1.46143	0.217744	3	-6.89273	1.33282	3	-16.0703	1.17265	3
																			1294.4	1425.62	4	22.3623	23.3702	3	-0.173934	1.66057	46	6.65171	10.9571	73	-7.25457	1.35312	3	-18.4041	1.46528	3
																			835.374	1277.33	4	14.3119	14.4165	3	0.0197973	0.0940974	3	0.0244876	0.0508954	3	-5	2.03748	4	-7.66667	1.73891	6
																			564.519	574.53	4	18.7843	16.5761	3	-0.106057	0.284071	3	-0.0117986	0.0464642	3	-18	7.33494	3	-37	8.39212	3
																			140.798	57.8519	3	22.3653	28.9686	3	-0.0422778	0.12134	3	0.0489751	0.136101	3	-7.1183	2.08967	3	-41.4205	4.05138	3
																			129.847	45.9558	3	14.4866	18.662	3	-0.00424229	0.153457	3	0.111307	0.1044	3	-23.3252	9.13452	3	-50.2483	5.54088	3
																			159.571	73.8168	3	15.7573	19.3751	3	-0.0530286	0.144354	3	-0.00756888	0.0363468	3	-5.991	3.13385	3	-25.0356	3.35766	3
																			1413.94	520.269	3	5.24531	10.6869	3	-0.00212114	0.110349	3	0.00601058	0.0540245	3	-28.4567	9.41794	3	-19.0235	6.07915	3
																			965.844	308.47	3	5.24531	10.6869	3	0.0848457	0.231507	3	0.164734	0.183376	3	-7.2	2.1	4	-39.6	17.2	3
																			1212.3	318.04	3	5.24531	10.6869	3	0.0777752	0.210379	3	0.0400706	0.0157963	3	-9.2	4.8	4	-41	11	3
																			319.203	123.297	3	5.24531	10.6869	3	0.0836749	0.222676	3	0.106855	0.121909	3	-9.7	3.7	4	-45.2	11.5	3
																			396.021	825.113	3	5.24531	10.6869	3	-0.0120198	0.0651236	3	0.0289398	0.0625671	3	-6.75	4.03268	3	-13.2	6.5	3
																			353.771	377.443	3	5.24531	10.6869	3							-7.05	2.87141	3	-16.9	10.5	3
																			1212.3	318.04	3	4.87065	10.043	3							-8.55	4.9679	3	-16.2	8	3
																			1212.3	318.04	3	4.49598	9.19427	3							10.5133	1.03735	3	-89.2967	4.94807	3
																			1212.3	318.04	3	6.36931	13.142	3							21.5818	1.1499	3	-89.2967	4.94807	3
																			353.771	377.443	3	4.87065	10.043	3							15.4941	0.770248	3	-89.2967	4.94807	3
																			353.771	377.443	3	4.49598	9.19427	3							-29.2978	7.48714	3	-89.2967	4.94807	3
																			353.771	377.443	3	6.36931	13.142	3							-15.0926	7.11535	3	-89.2967	4.94807	3
																			679.547	860.059	46	15.6518	24.3855	73							-22.9055	5.21628	3	-89.2967	4.94807	3
																			82.2	91.6431	15	27.8	103.895	15							15.4941	0.770248	3	-91.63	7.79423	3
																			38.4	42.8114	12	22.1	82.5925	12							15.4941	0.770248	3	-87.6	10.8253	3
																			53.5	59.646	15	34.5	128.934	15							15.4941	0.770248	3	-89.2967	6.51251	3
																			24.4	27.2031	29	5.6	20.9284	33							-22.9055	5.21628	3	-91.63	7.79423	3
																			19.9	22.1861	12	11.3	42.2305	12							-22.9055	5.21628	3	-87.6	10.8253	3
																			220.49	245.82	18	-0.5	1.86861	18							-22.9055	5.21628	3	-89.2967	6.51251	3
																			180.3	201.013	18	0.2	0.747443	18							3	1.22249	3	-42	9.52619	3
																			23.9	26.6456	10	8.7	32.5138	15							3	1.22249	3	-41	9.29938	3
																			129.839	144.754	3	3.22898	12.0674	3							-15	13	9836	-22	10	11052
																			104.976	117.035	3	16.732	62.5312	3							-28	11.4099	3	-36	8.16531	3
																			104.976	117.035	3	0	0	3							-18	7.33494	3	-24	5.44354	3
																			113.263	126.275	3	5.28379	19.7467	3							-11	4.48246	3	-13	2.94858	3
																			109.12	121.655	3	3.52253	13.1645	3							-16	6.51994	3	-20	4.53628	3
																			109.12	121.655	3	0.880632	3.29111	3							-12	4.88996	3	-27	6.12398	3
																			102.391	25.1495	5	6.65367	9.08852	5							-28	11.4099	3	-36	8.16531	3
																			970.384	1081.86	5	2.34835	4.07305	6							-18	7.33494	3	-24	5.44354	3
																															-11	4.48246	3	-13	2.94858	3
																															-16	6.51994	3	-20	4.53628	3
																															-12	4.88996	3	-27	6.12398	3
																															-18.7	7.2	15	-34.5	9.3	15
																															-27.8	9.3	12	-31.9	7.5	12
																															-16.6	8.2	15	-17.1	11.3	15
																															-26.2	12.1	29	-30	11.2	33
																															-38.9	9.4	12	-44.7	8.9	12
																															-2.5	2.3	18	-30.1	13.9	18
																															-8.3	7.5	18	-32	17.2	18
																															-27.5	13.7	10	-43.3	10.7	15
																															-2.9	2.4	3	-24.2	10.3	2
																															-10.6	7.7	3	-13.2	6.5	3
																															-10.6	7.7	3	-53.1	10.3	1
																															-3.9	3.3	3	-25.6	10.3	2
																															-10.2	4.7	3	-16.9	10.3	3
																															-10.2	4.7	3	-57.1	7.4	1
																															-9.4	9.3	5	-21.2	14.9	5
																															-6.5	3.5	5	-30.6	14.8	5
																															-17.3	2.25167	3	-21.9	3.4641	3
																															-6	-3	3	-21.8	6.5	3
																															-7	4	3	-22.6	5.6	3
Mean	-15908.2	3431	14	-25036.8	6792.18	14	13527.8	3344.3	14	22424	5637.73	14	-584.633	605.084	24	-1918.73	1431.68	24	366.29	59.7705	60	11.4867	3.26053	60	0.679068	0.38059	36	1.47939	0.632707	36	-10.7709	1.29299	82	-39.1145	2.84951	82
>50	-17120.4	4174.14	1	-14041.4	5227.16	1	12896.2	3709.29	1	14385.7	3774.67	1	-4224.28	12671.4	1	344.326	328.192	1	172	22	6	-1.5	0.6	6	0.3	0.35	6	3	0.95	6	-9	1.9	3	-34.51	4.08	3
	-15725.8	3834.11	1	-16611.2	6183.85	1	12587.5	3620.51	1	17012.8	4464	1	-3138.29	9413.79	1	401.537	382.722	1	107.852	101.115	6	11.097	12.9128	6	1	1.58114	10	2	2.84605	10	-4.5	2.76586	2	-18.45	8.95056	2
	-40673.4	10107.7	8	-44668.8	7435.52	8	25647	7128.47	8	30448.3	38699.4	8	-5500	16498.1	3	-5500	5242.29	3	51	61.032	3	5	6.00833	10	1	1.58114	10	2	4.42719	10	-0.59	1.75	4	-18.99	2.77	4
	-31496.7	7679.22	1	-47703.3	17758.5	1	24456.7	7034.41	1	44476.7	11670.3	1	-5500	16498.1	3	-5500	5242.29	3	101	133.448	3	13	25.9307	10	0.7	4.02498	3	0.8	1.19451	3	-2.05	1.38	4	-16.7	1.42	4
	-30323.3	7393.15	1	-45173.3	16816.6	1	22513.3	6475.45	1	43303.3	11362.4	1	-15026.4	12368.6	8	-14220.6	39407.3	8	245.984	274.242	1	137.104	512.387	1	0.0754286	0.155142	3	0.0644286	0.215022	3	-20.1	2	16	-38.2	2	16
	-7090	1524.2	3	-18490	3689.27	3	7020	1299.04	3	23060	2424.87	3	-7040	1650	1	-3226.67	953.333	1	5.4	6.02035	3	1.4	5.2321	3	0.141429	0.299397	3	1.80714	2.123	3	-23	3.2	16	-35.3	4.4	16
	-6290	1316.36	3	-19210	3290.9	3	5020	917.987	3	24030	2459.51	3	-7846.67	1466.67	1	-1870	1283.33	1	7.5	8.36159	3	1.6	5.97955	3	0.11	0.653231	3	4.00714	2.74901	3	-14.9098	1.07235	3	-31.9894	1.58019	3
													-80	2009.18	3	4580	4416.73	3	36.3867	4.15692	3	12.5733	5.12687	3	0.314286	1.80714	3	14.6143	21.8212	3	-13.4496	1.4237	3	-31.6062	2.05177	3
													-1270	1593.49	3	4820	4122.28	3	28.5011	28.6529	8	2.15511	5.83444	8	0.314286	1.80714	3	12.2571	18.3016	3	-15	6.11245	3	-38	8.61893	3
																			14.8839	86.7921	8	1.73982	9.02837	8	4.07	1.72	3	4.9	1.52	3	-26.2	1.6	4	-42	1.6	4
																			40.5532	36.0425	8	2.08779	4.89997	8	4.07	1.72	3	2.09	0.79	3	-5.9	4.8	12	-39.7	17.8	15
																			395.8	441.269	12	0.2	0.747443	15	0.3	0.35	6	3.7	1.05	6	-32.8	14.8	15	-48.3	15.3	15
																			22.6	25.1963	15	0.03	0.112116	15	0.3	0.35	6	1.5	0.6	6	-7.3	3.6	3	-75.6	14.2	3
																			75.6533	22.5859	3	1.94667	8.17528	3	0.3	0.35	6	37.7	2.95	4	-4.2	5.2	3	-64.3	5.9	3
																			36.8133	5.88897	3	0.973333	1.17779	3	-0.355362	38.2508	46	20.1997	184.053	53	-14.2266	0.841796	3	-56.101	3.59832	3
																			198.667	221.489	3	2.8	10.4642	3							-12.8213	0.77829	3	-49.306	4.30271	3
																			345.333	385.005	3	1.33333	4.98296	3							-9	1.9	3	-37.76	2.68	3
																			199.12	39.04	3	-1.37	0.68	3							-15	13	9836	-55	15	14736
																			199.12	39.04	3	94.82	9.86	3
																			172	22	6	1.5	1.6	6
																			172	22	6	-1.4	1.5	6
																			172	22	6	-0.6	0.65	4
																			1231.85	2386.96	46	23.7789	31.0429	53
Mean	-21245.7	4967.67	7	-29414	5853.88	7	15734.4	3195.94	7	28102.4	4519.34	7	-5513.96	1458.23	9	-2241.26	1957.58	9	175.305	52.9793	23	13.49	6.98433	23	0.842671	0.349762	15	7.37599	2.63524	15	-12.7804	2.0354	18	-40.6563	3.67901	18
Tropical	-129103	31476.7	1	-116380	43324.7	1	136437	39242.9	1	134603	35318.7	1	-4000	11998.6	4	2600	2478.17	4	218.59	226.197	25	-1.37308	0.504914	75	-0.0963265	0.0540294	3	1.54547	0.289318	3	3.33333	1.52753	3	-18.1	5.6	3
	-130313	31771.8	1	-121147	45099.2	1	132953	38241	1	128553	33731.3	1	-2700	8099.07	4	3900	3717.26	4	345.6	358.4	4	-2.4	0.8	4	-0.404403	1.16002	24	0.414401	1.31789	15	6.52	6.22	4	-36.47	14.77	4
	-120743	29438.5	1	-111613	41550.2	1	136987	39401.1	1	130093	34135.3	1	-2400	7199.18	4	4200	4003.2	4	17.1	7.96743	3	11.1	4.33013	3	4.24286	2.98571	7	3.77143	1.72857	10	-18.3	5.8	12	-39.6	3.6	23
	-128773	31396.3	1	-118947	44280.2	1	127783	36754	1	122870	32240	1	-2700	8099.07	4	5300	5051.66	4	17.3	8.14064	3	12.5	5.02295	3	4.24286	2.98571	7	7.85714	4.24286	8	-18.3	5.8	12	-55.5	4.4	25
	-131193	31986.3	1	-154037	57343.1	1	146923	42259.2	1	176367	46277.1	1	-2850	8549.02	4	5150	4908.69	4	29.565	10.6773	3	7.99188	0.8736	3	4.24286	2.98571	7	1.88571	2.81563	1	-18.3	5.8	12	-65.5	5	7
	-138600	33792.1	1	-152680	56838	1	150003	43145.1	1	173837	45613.2	1	7663.33	22987.4	1	18223.3	17369.4	1	142.076	118.227	24	1.34264	1.8695	15	0.745258	0.238304	3	2.051	1.58487	3	-18.3	5.8	12	-78.6	7.5	8
	-135483	33032.3	1	-150663	56087.3	1	139810	40213.2	1	166357	43650.5	1	2640	7919.09	1	7406.67	7059.61	1	38.1333	12.9333	8	4.93333	2.53333	7	0.878429	0.161857	4	24.849	0.655286	4	-14.0415	3.86183	3	-37.9121	6.28467	3
	-134383	32764.1	1	-148133	55145.5	1	136253	39190.2	1	161810	42457.5	1	16243.3	48724.4	1	18480	17614.1	1	38.1333	12.9333	8	6.93333	6.8	5	1.18009	0.736183	2	0.916363	0.556738	6	-7	2.85247	6	-57	12.9284	6
	-160161	10636.5	3	-207277	21272.6	3	67306.6	13632.7	3	144421	24745.8	3	-990	2969.66	1	3923.33	3739.5	1	38.1333	12.9333	8	-0.266667	0.996591	1	0.974286	0.172857	4	11.1571	1.88571	4	-10	23	4	-56	34	4
	-160161	10636.5	3	-129453	6791.91	3	67306.6	13632.7	3	78968.1	7711.6	3	15730	47184.6	1	22330	21283.7	1	38.1333	12.9333	8	2.66667	3.6	5	6.91429	1.88571	4	36.1429	15.4	4	-16	0.7	2	-44	14	6
													11403.3	34206.1	1	21156.7	20165.3	1	116	129.326	6	-9	33.6349	6	1.1	6.32497	3	5.18571	7.74299	3	-15	6.11245	4	-60	13.6088	4
													4326.67	12978.5	1	15693.3	14958	1	1.36508	1.12698	4	-0.0238095	0.047619	4	1.1	6.32497	3	1.88571	2.81563	3	-9.63	3.92419	4	-60	13.6088	4
													1870	5609.36	1	13676.7	13035.8	1	102.017	83.3458	2	0.614194	11.8696	6							-8.65	3.52484	4	-60	13.6088	4
													-92854.6	8527.39	3	-62856.8	12642.4	3	23	25.6422	4	0.03	0.112116	4							-9.62	3.92012	4	-80	18.1451	4
													-92854.6	8527.39	3	-50485.3	3652.22	3	23	25.6422	4	0.03	0.112116	4							-5.36	2.18418	4	-80	18.1451	4
																			23	25.6422	4	0.03	0.112116	4							6	22	5	-14	23	5
																			23	25.6422	4	2.2	8.22188	4							-45.3	5.71577	3	-60.2	4.67654	3
																			23	25.6422	4	2.2	8.22188	4							-45.3	5.71577	3	-27.4	4.50333	3
																			12.848	8.176	2	-3.504	1.168	2							6	22	5	-39	15	5
																			96.36	53.436	5	120.888	71.832	5							6	22	5	-21	18	5
																			434.706	437.349	5	15.2941	15.1263	5							-22	8.96492	1	-77	17.4647	1
																			434.706	437.349	5	78.8235	78.92	5							-17	6.92744	1	-73	16.5574	1
																			434.706	437.349	5	225.588	225.58	5							-11	4.48246	1	-59	13.382	1
																			26.0514	12.5158	3	-2.27906	1.8593	3							10	4.07496	1	-45	10.2066	1
																			118.267	131.853	1	58	216.759	1							-5.61497	0.897612	3	-132.257	8.67181	3
																			115.067	128.285	1	63.3333	236.69	1							-5.61497	0.897612	3	-65.2351	10.1775	3
																			105.2	117.285	1	45.4667	169.919	1							-7.6	3.09697	1	-20.2	4.58164	1
																			118.267	131.853	1	26.1333	97.6659	1							-2.4	0.977991	1	-23.2	5.26209	1
																			115.067	128.285	1	31.7333	118.594	1							-4.8	1.95598	1	-19	4.30947	1
																			105.2	117.285	1	29.7333	111.12	1							-7.6	3.09697	1	-66.4	15.0605	1
																															-2.4	0.977991	1	-61.5	13.9491	1
																															-4.8	1.95598	1	-58.5	13.2686	1
Mean	-136892	4159.61	10	-141033	9022.74	10	124176	9688.21	10	141788	9370.17	10	-9431.51	8913.43	15	1913.19	6422.61	15	112.453	23.8639	30	24.2906	8.76298	30	2.09335	0.648362	12	8.1385	3.2228	12	-9.75244	2.22432	32	-52.8304	4.35148	32
Temperate	-17120.4	4174.14	1	-14041.4	5227.16	1	12896.2	3709.29	1	14385.7	3774.67	1	-2080	200	4	-720	580	4	155.93	91.89	3	-0.52095	0.420619	3	0.0932169	0.205535	3	1.16346	0.389226	3	11.41	3.12165	4	-91.8	9.7	4
	-15725.8	3834.11	1	-16611.2	6183.85	1	12587.5	3620.51	1	17012.8	4464	1	-2080	200	4	-1200	800	4	155.93	91.89	3	-0.5015	0.69632	3	0.0932169	0.205535	3	1.61772	0.538782	3	5.655	3.80894	4	-105	8.1	4
	-40673.4	10107.7	8	-44668.8	7435.52	8	25647	7128.47	8	30448.3	38699.4	8	8950.33	4633.11	6	19004.3	11808.6	6	155.93	91.89	3	-0.613	0.526	3	0.109127	0.239511	3	1.87111	1.14387	3	-31.375	10.768	4	-57.38	9.45	4
	-2994.92	676.52	3	-2403.54	338.397	3	3969.45	723.087	3	4246.55	528.204	3	-4224.28	12671.4	1	344.326	328.192	1	155.93	91.89	3	-0.35	0.701	3	0.109127	0.239511	3	0.267302	0.160211	3	-6.17	1.6	3	-32.34	1.06	3
	-3247.74	576.551	3	-2538.13	178.152	3	4869.5	764.579	3	4268.1	956.61	3	-3138.29	9413.79	1	401.537	382.722	1	155.93	91.89	3	-0.964	0.263	3	0.109127	0.239511	3	1.63054	0.966164	3	-6.17	1.6	3	-37.89	1.4	3
	-4239.56	1115.02	3	-3364.95	1102.25	3	7477.34	1843.72	3	5971.03	1963.46	3	-2040	6119.3	3	5060	698.594	3	155.93	91.89	3	0.35	1.927	3	0.109127	0.239511	3	2.11168	0.984942	3	-20.33	2.57	3	-32.34	1.06	3
	-2945.16	96.3275	3	-2329.57	936.727	3	2386.83	98.5654	3	2420.49	226.676	3	-4180	12538.6	3	1540	1460.7	3	77.6798	41.1094	3	1.31787	0.996826	3	0.3	0.35	6	3	0.95	6	-20.33	2.57	3	-37.89	1.4	3
	-2887.69	116.061	3	-2017.07	715.266	3	2301.58	97.8987	3	2420.49	564.274	3	-5500	16498.1	3	-5500	5242.29	3	77.6798	41.1094	3	-1.09987	0.821474	3	0.123163	1.53286	3	0.374147	1.1113	3	-6.17	1.6	3	-40	0	3
	-2413.6	229.444	3	-1974.45	445.589	3	3307.46	917.365	3	2946	650.639	3	-5500	16498.1	3	-5500	5242.29	3	80.9305	80.9275	3	-0.14922	1.92423	3	1.81938	10.4614	3	1.43821	2.14745	3	-6.17	1.6	3	-14.4755	3.48287	3
	-1544.05	837.607	3	-1178.56	1103.81	3	821.957	860.953	3	1214.11	590.586	3	-15026.4	12368.6	8	-14220.6	39407.3	8	80.9305	80.9275	3	2.50126	2.38319	3	1.10722	6.36652	3	6.6686	9.95714	3	-6.17	1.6	3	-40	0	3
	-998.699	642.031	3	-1433.38	1186.71	3	688.15	827.81	3	910.581	867.05	3	974.532	469.466	3	1843.01	320.759	3	80.9305	80.9275	3	-2.9015	2.23862	3	0.53232	3.06082	3	2.10397	3.14153	3	-6.17	1.6	3	-31.7101	5.4726	3
	-757.078	753.461	3	-1751.91	1655.7	3	764.611	794.728	3	1696.18	1486.73	3	1621.76	1098.32	3	1729.97	370.594	3	80.9305	80.9275	3	1.14015	0.605658	3	0.584802	3.3626	3	2.82505	4.2182	3	-20.33	2.57	3	-40	0	3
	-3659.96	593.485	3	-2778.65	942.718	3	6251.17	266.977	3	7838.28	2291.05	3	3237.78	1588.21	3	2606.08	272.81	3	1212.3	324.686	9	4.80305	10.1006	9	0.0722617	0.415503	3	1.56147	2.3315	3	-20.33	2.57	3	-14.4755	3.48287	3
	-4810.23	507.91	3	-5079.11	317.388	3	4762.05	997.805	3	6143.13	1144.58	3	-558.335	748.746	3	90.9264	382.259	3	2106.5	550.27	12	-0.369466	0.858462	12	1.068	6.14097	3	1.97459	2.94833	3	-20.33	2.57	3	-40	0	3
	-1686.2	951.524	3	-4019.34	183.636	3	2652.48	1183.12	3	3491.73	187.138	3	-586.112	363.92	3	403.429	463.613	3	382.1	116.458	9	31.0351	65.3585	9	0.352375	2.02615	3	2.90729	4.34099	3	-20.33	2.57	3	-31.7101	5.4726	3
	-7900.04	1770.2	3	-3744.71	2032.4	3	12362.9	2275.27	3	15082.7	2876.42	3	893.864	1145.19	3	971.546	320.497	3	60.9422	16.4004	12	31.0351	65.3585	12	0.23227	1.33555	3	3.19393	4.76898	3	-15.3	3.2	6	-47.7	6.2	6
	-10050.8	1612.55	3	-12603.4	2731.15	3	9984.97	333.566	3	15408.3	3231.81	3	-722.094	355.554	3	35.5494	98.4044	3	76.5986	97.385	3	1.28814	5.04394	3	0.0727753	0.418456	3	1.91761	2.86326	3	-9	1.9	3	-34.51	4.08	3
	-3420.21	2581.35	3	-7240.46	1430.82	3	3050.27	3364.46	3	7768.13	631.537	3	-310.549	752.083	3	-522.801	196.666	3	76.5986	97.385	3	-0.990878	2.11119	3	0.31635	1.819	3	3.54269	5.28973	3	-26.8	10.9209	3	-62.1	14.0852	3
	-5163.66	1258.95	3	-11281.8	4199.85	3	3223.08	927.045	3	10128.9	2657.72	3	7.53274	385.9	3	-55.7311	131.304	3	3.31045	3.22256	3	0.972568	5.00563	3	0.0216785	0.124651	3	1.41952	2.11955	3	-5.83333	5.33854	4	-19.5	4.06202	4
	-6329	1543.08	3	-6508.75	2423	3	5111.97	1470.34	3	5566.42	1460.58	3	2591.21	1600.55	3	5059.64	1113.54	3	3.31045	3.22256	3	-0.748129	2.05654	3	0.0628234	0.361233	3	2.46823	3.68541	3	-17.5	4.94975	4	-34	11.3137	4
	-6329	1543.08	3	-4475.64	1666.14	3	5111.97	1470.34	3	5547.62	1455.65	3	-48.1792	1897.39	3	1064.02	385.191	3	69.1892	105.74	3	0.20126	3.76732	3	2.00132	11.5076	3	3.11612	4.6528	3	-10	5.65685	4	-16.5	3.53553	4
	-6053.29	1475.86	3	-11865.7	4417.24	3	4090.62	1176.58	3	9751.57	2558.73	3	966.284	2670.81	3	-527.613	119.076	3	69.1892	105.74	3	3.60831	8.77628	3	2.05627	11.8235	3	3.95948	5.91205	3	10	14.1421	4	-8	2.82843	4
	-8439.78	2057.71	3	-8092.57	3012.61	3	5436.64	1563.73	3	7258.53	1904.57	3	4462.89	2118.44	3	11338	1981.84	3	69.1892	105.74	3	-2.34325	2.17251	3	0.144523	0.831006	3	2.27124	3.39127	3	22	8.96492	3	-35	7.93849	3
	-8439.78	2057.71	3	-6425.78	2392.12	3	5436.64	1563.73	3	7678.42	2014.75	3	-65.8217	2444.11	3	2804.95	528.035	3	69.1892	105.74	3	1.96948	4.47045	3	0.251294	1.44493	3	2.71505	4.05395	3	18	7.33494	3	-25	5.67035	3
	-17995	1848.15	3	-2054.55	2813.75	3	11579.7	6378.08	3	3447.39	3117.48	3	-369.935	430.23	3	527.664	650.282	3	3.35183	3.21266	3	0.157107	2.94067	3	-0.0688286	0.395763	4	0.19272	0.287758	4	14	5.70495	3	-31	7.03124	3
	-5231.5	774.591	5	-7422.05	3514.83	5	4243.1	1520.75	5	7080.96	2727.09	5	-1940.58	5821.09	3	-1152.9	1098.88	3	3.35183	3.21266	3	2.81671	12.1107	3	-0.0688286	0.395763	4	4.59775	6.86508	4	8	3.25997	3	-30	6.80442	3
	-7616.01	1856.86	5	-11234.3	2636.97	5	7943.33	2284.72	5	12092.3	4450.75	5	-1217.03	3650.68	3	-942.327	898.172	3	3.35183	3.21266	3	-1.82918	1.6562	3	-0.6525	0.0930706	4	0.6623	0.0612651	4	55	22.4123	3	-30	6.80442	3
	-31496.7	7679.22	1	-47703.3	17758.5	1	24456.7	7034.41	1	44476.7	11670.3	1	-1217.03	3650.68	3	1071.98	1021.75	3	3.35183	3.21266	3	1.53741	3.47621	3	-0.6525	0.0930706	4	0.1247	0.0414502	4	45	18.3373	3	-32	7.25805	3
	-30323.3	7393.15	1	-45173.3	16816.6	1	22513.3	6475.45	1	43303.3	11362.4	1	-1962.67	5887.33	3	-2114.15	2015.08	3	88	60.4722	6	-2	5.96285	6	-0.6525	0.0930706	4	0.4203	0.0277308	4	37	15.0774	3	-39	8.84575	3
	-7090	1524.2	3	-18490	3689.27	3	7020	1299.04	3	23060	2424.87	3	-3003.14	9008.39	3	-834.035	794.955	3	172	22	6	-1.5	0.6	6	-0.3622	0.554237	4	-0.0285	0.0995691	4	24	9.77991	3	-36	8.16531	3
	-6290	1316.36	3	-19210	3290.9	3	5020	917.987	3	24030	2459.51	3	-3003.14	9008.39	3	1252.64	1193.95	3	29.8775	10.5769	3	21.2484	3.45421	3	-0.3622	0.554237	4	0.0821	0.0126396	4	60	24.4498	3	-38	8.61893	3
	-32633.3	3600	3	-65926.7	5926	3	30690	3652	3	61160	6593	3	-6415.32	6104.44	3	1392.84	1342.19	3	24.519	3.85853	3	2.714	1.82043	3	-0.3622	0.554237	4	0.3004	0.0231864	4	41	16.7074	3	-31	7.03124	3
	-36630	4321	3	-75753.3	7859	3	33953.3	4126	3	64753.3	9463	3	-988.397	1706.65	5	-341.083	4448.71	5	37.001	14.2297	3	17.569	3.32601	3	2.10247	12.0892	4	6.80088	10.1547	4	65	26.4873	3	-38	8.61893	3
	-51700	12605	1	-15510	5773.89	1	39196.7	11274	1	35236.7	9245.79	1	327.323	2944.13	5	857.98	5173.28	5	29.018	28.4589	3	44.106	9.75645	3	0.692443	3.98153	4	1.89002	2.82207	4	50	20.3748	3	-34	7.71168	3
	-52030	12685.5	1	-33366.7	12421.4	1	53753.3	15460.9	1	42936.7	11266.2	1	-7040	1650	1	-3226.67	953.333	1							0.692443	3.98153	4	1.20293	1.79615	4	15	6.11245	3	-35	7.93849	3
	-51700	12605	1	-15510	5773.89	1	39196.7	11274	1	35236.7	9245.79	1	-7846.67	1466.67	1	-1870	1283.33	1							0.692443	3.98153	4	1.54648	2.30911	4	17	6.92744	3	-37	8.39212	3
	-52030	12685.5	1	-33366.7	12421.4	1	53753.3	15460.9	1	42936.7	11266.2	1	-655.75	1124.84	3	13852.5	8765.26	3							1.07574	6.1855	4	1.01035	1.5086	4	43	17.5223	3	-31	7.03124	3
	-51700	12605	1	-15510	5773.89	1	39196.7	11274	1	35236.7	9245.79	1	-388.525	1170.6	3	10594.2	5864.68	3							0	0	3	0.03	0.0447942	3	40	16.2999	3	-30	6.80442	3
	-52030	12685.5	1	-33366.7	12421.4	1	53753.3	15460.9	1	42936.7	11266.2	1	-1372.98	924.102	3	9692.62	5495.05	3							0	0	3	0.05	0.074657	3	-24.4	23.9023	3	-57.4	28.4056	3
	-38630	9418.4	1	-35990	880	1	37280	1760	1	35670	670	1	-1372.98	924.102	3	17704.9	3753.22	3							0.801429	0.190526	3	1.52429	0.353833	3	-5	2.03748	4	-7.66667	1.73891	6
	-21404.3	5218.59	1	-19205.5	7149.61	1	15413.8	4433.43	1	13847.5	3633.46	1	81.85	1631.67	3	9282.76	6092.17	3							0.801429	0.190526	3	1.46143	0.217744	3	-5	2.03748	4	-54.4	12.3387	6
													-983.6	94.6277	3	8811.48	5873.93	3							0.7	4.02498	3	0.8	1.19451	3	-109	44.4171	4	-121	27.4445	4
													-80	2009.18	3	4580	4416.73	3							0.593068	2.31254	34	4.49269	1.79388	12	-109	44.4171	4	-119	26.9909	4
													-1270	1593.49	3	4820	4122.28	3							0.0754286	0.155142	3	0.0644286	0.215022	3	-109	44.4171	4	-138	31.3003	4
													-1943.33	436	3	-4766.67	1203	3							1.3785	1.03016	6	3.2243	3.54833	6	-76	30.9697	4	-84	19.0524	4
													-2676.67	563	3	-11000	2602	3							1.3785	1.03016	6	2.80374	2.51817	6	-8	3.25997	3	-11	2.49495	3
													-12503.3	37505.7	1	19726.7	18802.3	1							2.29429	0.870974	3	2.15286	0.816538	3	-8	3.25997	3	-19	4.30947	3
													1723.33	5169.41	1	9570	9121.58	1							0.345714	0.108872	3	0.298571	0.0816538	3	-7.2	2.1	4	-39.6	17.2	3
													-12503.3	37505.7	1	19726.7	18802.3	1							0.0587703	0.337928	3	0.0698334	0.104271	3	-9.2	4.8	4	-41	11	3
													1723.33	5169.41	1	9570	9121.58	1							0.175	0.0666458	3	3.8645	2.34314	3	-9.7	3.7	4	-45.2	11.5	3
													-12503.3	37505.7	1	19726.7	18802.3	1	3.1	0.1	3	-2.81	0.1	3	0.815	0.720284	3	5.59575	4.41512	3	-6.75	4.03268	3	-13.2	6.5	3
													1723.33	5169.41	1	9570	9121.58	1	244.124	272.168	4	190.384	711.506	6	0.0055	0.0389284	3	0.559	0.834626	3	-7.05	2.87141	3	-16.9	10.5	3
													-1350	2670	1	-320	1110	1	244.124	272.168	4	6.70432	25.0555	6	0.141429	0.299397	3	1.80714	2.123	3	-8.55	4.9679	3	-16.2	8	3
													-5990.5	17969.4	1	-5358	5106.94	1	34.8843	2.76049	4	15.5944	2.10278	4	0.11	0.653231	3	4.00714	2.74901	3	10.5133	1.03735	3	-89.2967	4.94807	3
																			34.8843	2.76049	4	-3.7234	0.337	4	3.54196	380.035	34	22.446	202.874	9	21.5818	1.1499	3	-89.2967	4.94807	3
																			34.8843	2.76049	4	-6.8844	0.447298	4	4.07	1.72	3	4.9	1.52	3	15.4941	0.770248	3	-89.2967	4.94807	3
																			12.3249	4.04823	4	4.5682	1.43858	4	4.07	1.72	3	2.09	0.79	3	-29.2978	7.48714	3	-89.2967	4.94807	3
																			12.3249	4.04823	4	-2.4133	0.283437	4	0.3	0.35	6	3.7	1.05	6	-15.0926	7.11535	3	-89.2967	4.94807	3
																			12.3249	4.04823	4	0.2877	0.263124	4	0.3	0.35	6	1.5	0.6	6	-22.9055	5.21628	3	-89.2967	4.94807	3
																			0.0410882	0.0458084	4	0.174974	0.653915	4	0.3	0.35	6	37.7	2.95	4	15.4941	0.770248	3	-91.63	7.79423	3
																			-0.121229	0.135156	4	0.0617247	0.230679	4							15.4941	0.770248	3	-87.6	10.8253	3
																			-0.121229	0.135156	4	-0.123449	0.461357	4							15.4941	0.770248	3	-89.2967	6.51251	3
																			-0.121229	0.135156	4	0.123449	0.461357	4							-22.9055	5.21628	3	-91.63	7.79423	3
																			-0.528	0.588656	4	-0.261333	0.976659	4							-22.9055	5.21628	3	-87.6	10.8253	3
																			1294.4	1425.62	4	22.3623	23.3702	3							-22.9055	5.21628	3	-89.2967	6.51251	3
																			835.374	1277.33	4	14.3119	14.4165	3							-20.1	2	16	-38.2	2	16
																			564.519	574.53	4	18.7843	16.5761	3							-23	3.2	16	-35.3	4.4	16
																			140.798	57.8519	3	22.3653	28.9686	3							7.1	1.3435	3	-26	5.65685	3
																			129.847	45.9558	3	14.4866	18.662	3							14.2	1.90919	3	-26.3	4.6669	3
																			159.571	73.8168	3	15.7573	19.3751	3							3	1.22249	3	-42	9.52619	3
																			1413.94	520.269	3	5.24531	10.6869	3							3	1.22249	3	-41	9.29938	3
																			965.844	308.47	3	5.24531	10.6869	3							-14.9098	1.07235	3	-31.9894	1.58019	3
																			1212.3	318.04	3	5.24531	10.6869	3							-13.4496	1.4237	3	-31.6062	2.05177	3
																			319.203	123.297	3	5.24531	10.6869	3							-15	6.11245	3	-38	8.61893	3
																			396.021	825.113	3	5.24531	10.6869	3							-37.6264	4.42144	6	-45.2227	4.41319	6
																			353.771	377.443	3	5.24531	10.6869	3							-37.6264	4.42144	6	-55.7757	3.84013	6
																			1212.3	318.04	3	4.87065	10.043	3							-26.2	1.6	4	-42	1.6	4
																			1212.3	318.04	3	4.49598	9.19427	3							1.21569	0.497682	5	-1.36275	0.94223	5
																			1212.3	318.04	3	6.36931	13.142	3							1.66387	0.344183	5	-0.554622	0.631677	5
																			353.771	377.443	3	4.87065	10.043	3							1.38824	0.465264	5	-1.03529	0.83641	5
																			353.771	377.443	3	4.49598	9.19427	3							0.281046	1.08232	5	0.573529	0.959075	5
																			353.771	377.443	3	6.36931	13.142	3							1.45752	0.757031	5	1.14879	0.755436	5
																			245.984	274.242	1	137.104	512.387	1							3.00929	0.829079	5	2.81115	0.807144	5
																			54.7059	60.9905	3	0	0	3							-24.4	9.94291	1	-83.7	18.9843	1
																			57.3529	63.9416	3	0	0	3							-24.4	9.94291	1	-49.1	11.1366	1
																			5.4	6.02035	3	1.4	5.2321	3							-24.4	9.94291	1	-63.8	14.4707	1
																			7.5	8.36159	3	1.6	5.97955	3							-24.4	9.94291	1	-34.4	7.8024	1
																			1948.06	3162.77	34	12.6985	4.59047	12							-24.4	9.94291	1	-83.7	18.9843	1
																			36.3867	4.15692	3	12.5733	5.12687	3							-24.4	9.94291	1	-49.1	11.1366	1
																			42.7397	33.5547	6	15.6164	21.475	6							-24.4	9.94291	1	-63.8	14.4707	1
																			42.7397	33.5547	6	16.1644	14.764	6							-24.4	9.94291	1	-34.4	7.8024	1
																			21.18	2.25167	3	9.06	0.952628	3							-24.4	9.94291	1	-83.7	18.9843	1
																			13.53	1.59349	3	3.23	0.744782	3							-24.4	9.94291	1	-49.1	11.1366	1
																			28.5011	28.6529	8	2.15511	5.83444	8							-24.4	9.94291	1	-63.8	14.4707	1
																			14.8839	86.7921	8	1.73982	9.02837	8							-24.4	9.94291	1	-34.4	7.8024	1
																			40.5532	36.0425	8	2.08779	4.89997	8							-20.8	8.47593	1	-48.2	10.9324	1
																			185.202	63.2215	5	121.186	57.5102	5							-20.8	8.47593	1	-46	10.4334	1
																			72.3722	16.2903	5	28.3086	7.70134	5							-20.8	8.47593	1	-40	9.07256	1
																			49.4652	13.3716	5	54.3402	13.782	5							-20.8	8.47593	1	-31.5	7.14464	1
																			161.001	78.5978	5	91.077	23.5998	5							-20.8	8.47593	1	-48.2	10.9324	1
																			33.1824	11.0476	5	70.5775	17.9972	5							-20.8	8.47593	1	-46	10.4334	1
																			149.588	54.0026	5	185.745	48.7388	5							-20.8	8.47593	1	-40	9.07256	1
																			4.34491	9.59618	6	-0.161156	0.558219	6							-20.8	8.47593	1	-31.5	7.14464	1
																			4.34491	9.59618	6	-0.0537186	0.539887	6							-20.8	8.47593	1	-48.2	10.9324	1
																			4.34491	9.59618	6	0.0537186	0.43312	6							-20.8	8.47593	1	-46	10.4334	1
																			4.34491	9.59618	6	0.0537186	0.43312	6							-20.8	8.47593	1	-40	9.07256	1
																			27.5178	12.1376	6	-0.161156	0.561029	6							-20.8	8.47593	1	-31.5	7.14464	1
																			27.5178	12.1376	6	-0.0537186	11.6654	6							-48.7	19.8451	1	-77.6	17.6008	1
																			27.5178	12.1376	6	0.0537186	1.49411	6							-48.7	19.8451	1	-119.3	27.0589	1
																			27.5178	12.1376	6	0.0537186	0.43312	6							-48.7	19.8451	1	-85.1	19.3019	1
																			17.621	25.0607	6	-0.161156	0.561029	6							-48.7	19.8451	1	-90	20.4133	1
																			17.621	25.0607	6	-0.0537186	0.539887	6							-48.7	19.8451	1	-77.6	17.6008	1
																			17.621	25.0607	6	0.0537186	0.43312	6							-48.7	19.8451	1	-119.3	27.0589	1
																			17.621	25.0607	6	0.0537186	0.43312	6							-48.7	19.8451	1	-85.1	19.3019	1
																			3.03325	6.954	6	0.0537186	0.486467	6							-48.7	19.8451	1	-90	20.4133	1
																			3.03325	10.1267	6	-0.107437	0.270438	6							-48.7	19.8451	1	-77.6	17.6008	1
																			3.03325	10.1267	6	-0.107437	0.391199	6							-48.7	19.8451	1	-119.3	27.0589	1
																			3.03325	10.1267	6	-0.0537186	0.379879	6							-48.7	19.8451	1	-85.1	19.3019	1
																			11.6275	19.9193	6	0.0537186	0.486467	6							-48.7	19.8451	1	-90	20.4133	1
																			11.6275	19.9193	6	-0.107437	0.289448	6							-1.75369	0.698089	3	-7.76355	0.988327	3
																			11.6275	19.9193	6	-0.107437	0.391199	6							-1.75369	0.698089	3	-13.5567	1.76671	3
																			11.6275	19.9193	6	-0.0537186	0.379879	6							-1	0.407496	3	-20	4.53628	3
																			13.1441	20.2854	6	0.0537186	0.486467	6							-1	0.407496	3	-20	4.53628	3
																			13.1441	20.2854	6	-0.107437	0.289448	6							-1	0.407496	3	-20	4.53628	3
																			13.1441	20.2854	6	-0.107437	0.391199	6							-1	0.407496	3	-20	4.53628	3
																			13.1441	20.2854	6	-0.0537186	0.391199	6							-1	0.407496	3	-20	4.53628	3
																			0.252771	2.03976	6	-0.161156	0.561029	6							-1	0.407496	3	-20	4.53628	3
																			0.252771	2.03976	6	-0.161156	0.561029	6							-18.7287	0.97568	3	-28.7695	0.91964	3
																			0.252771	2.03976	6	-0.161156	0.509829	6							-15.9107	1.02278	3	-23.4539	1.19619	3
																			0.252771	2.03976	6	-0.214874	0.529426	6							-11.5958	0.449548	3	-23.2087	0.781013	3
																			1.26385	3.78274	6	-0.161156	0.561029	6							-11.1423	0.601359	3	-18.0273	0.60993	3
																			1.26385	3.78274	6	-0.161156	0.561029	6							-7.50498	0.561476	3	-14.8862	0.594753	3
																			1.26385	3.78274	6	-0.161156	0.561029	6							-5.97271	0.389936	3	-14.6078	0.447359	3
																			1.26385	3.78274	6	-0.214874	0.529426	6							9.60943	0.824727	3	0.242424	0.325066	3
																			0.758313	2.17535	6	-0.161156	0.561029	6							10.7344	0.899078	3	1.41533	0.519516	3
																			0.758313	2.17535	6	-0.161156	0.561029	6							21.8788	1.10818	3	0.768375	1.271	3
																			0.758313	2.17535	6	-0.161156	0.529426	6							-17.5	4.94975	4	-34	11.3137	4
																			0.758313	2.17535	6	-0.214874	0.529426	6							-10	5.65685	4	-16.5	3.53553	4
																			130.67	68.1931	3	61.028	43.2424	3							10	14.1421	4	-8	2.82843	4
																			130.67	68.1931	3	1.36267	1.51728	3							-17.5	4.94975	4	-34	11.3137	4
																			224.954	27.3008	3	41.2194	28.2481	3							-10	5.65685	4	-16.5	3.53553	4
																			319.739	43.9304	3	51.7113	35.1389	3							10	14.1421	4	-8	2.82843	4
																			231.159	29.8494	3	36.3221	24.7837	3							-2.9	2.4	3	-24.2	10.3	2
																			493.106	526.283	3	78.7221	80.0451	3							-10.6	7.7	3	-13.2	6.5	3
																			806.569	856.382	3	84.6274	85.5251	3							-10.6	7.7	3	-53.1	10.3	1
																			660.575	706.607	3	60.9462	61.8333	3							-3.9	3.3	3	-25.6	10.3	2
																			119.519	34.8241	3	20.1199	3.77863	3							-10.2	4.7	3	-16.9	10.3	3
																			756.954	966.524	3	140.839	231.797	3							-10.2	4.7	3	-57.1	7.4	1
																			99.5992	34.5002	3	2.01199	4.1126	3							0	0	8	-20	4.53628	8
																			230.5	197.031	3	118.907	159.666	3							-40.5187	20.3702	6	-50.3513	17.9575	6
																			1089.64	927.79	3	639.124	304.357	3							-40.5187	20.3702	6	-50.4495	14.6613	6
																			146.682	127.237	3	29.7267	18.9234	3							-18.4398	7.46607	6	-32.9269	5.91818	6
																			158.063	156.238	3	533.279	463.453	3							-18.4398	7.46607	6	-40.3671	4.08436	6
																			1422.57	1619.31	3	1233.21	527.22	3							-25.3276	3.72169	6	-38.1387	2.9417	6
																			87.813	511.89	3	83.3248	58.0452	3							-25.3276	3.72169	6	-44.8709	2.27024	6
																			129.839	144.754	3	3.22898	12.0674	3							-48.7617	3.88447	6	-60.4537	3.57114	6
																			104.976	117.035	3	16.732	62.5312	3							-48.7617	3.88447	6	-64.1947	3.05034	6
																			104.976	117.035	3	0	0	3							-15.2419	0.798346	3	-86.7473	35.7418	3
																			113.263	126.275	3	5.28379	19.7467	3							-9.4	9.3	5	-21.2	14.9	5
																			109.12	121.655	3	3.52253	13.1645	3							-6.5	3.5	5	-30.6	14.8	5
																			109.12	121.655	3	0.880632	3.29111	3							-7.3	3.6	3	-75.6	14.2	3
																			78.7367	27.5971	8	125.204	186.104	8							-4.2	5.2	3	-64.3	5.9	3
																			42	46.8249	3	2	7.47443	3							-14.2266	0.841796	3	-56.101	3.59832	3
																			3.09918	0.977253	4	1.53228	0.416506	4							-12.8213	0.77829	3	-49.306	4.30271	3
																			3.09918	0.977253	4	0.581798	0.210307	4							-9	1.9	3	-37.76	2.68	3
																			102.391	25.1495	5	6.65367	9.08852	5							-6	-3	3	-21.8	6.5	3
																			970.384	1081.86	5	2.34835	4.07305	6							-7	4	3	-22.6	5.6	3
																			132.85	167.403	3	10.2	15.5713	3
																			136.1	88.3369	3	18.15	9.79392	3
																			136.1	88.3369	3	9.9	15.5713	3
																			136.1	88.3369	3	1	5.05602	3
																			107.675	94.6319	3	39.175	27.6102	3
																			34.4	38.3518	4	-3.06667	11.4608	4
																			34.4	38.3518	4	0.16	0.597955	4
																			84.2667	93.9472	4	-1.46667	5.48125	4
																			16	17.8381	4	-2.36	8.81983	4
																			11.8667	13.2299	4	-0.6	2.24233	4
																			21.0667	23.4868	4	-2.48	9.2683	4
																			75.6533	22.5859	3	1.94667	8.17528	3
																			36.8133	5.88897	3	0.973333	1.17779	3
																			1745.84	3724.25	34	-3.77581	115.31	9
																			199.12	39.04	3	-1.37	0.68	3
																			199.12	39.04	3	94.82	9.86	3
																			172	22	6	1.5	1.6	6
																			172	22	6	-1.4	1.5	6
																			172	22	6	-0.6	0.65	4
Mean	-17423.4	2839.24	41	-16420	2836.29	41	15223.3	2525.86	41	18464.5	2746.86	41	-1988.39	582.238	54	3082.53	1003.2	54	207.38	29.6495	170	28.4408	8.95067	170	0.601193	0.130281	60	3.00105	0.711049	60	-11.9476	2.02063	167	-44.6248	2.3013	167
Boreal	-40736.3	9264.57	6	-30951.1	7720.48	6	23661.8	8127.26	6	17959.9	6049.92	6	-17074.5	1832.4	6	-12991.2	15856.4	6	155.371	42.7092	6	185.222	44.6467	6	-0.101835	0.063291	3	2.96318	0.679484	3	-38	7.6	3	-73	10.3	3
	-29498.7	5661.68	6	-23758.3	4117.59	6	24809.1	6528.42	6	21625.2	4944.44	6	-4689.64	822.558	6	-2133.05	2649.35	6	12.1217	3.29588	6	18.3903	4.91263	6	0.028689	0.0472675	3	0.803	0.225132	3	-38	7.6	3	-112	15.2	3
	-9117.23	2424.32	3	-4187.61	3018.54	3	12663.5	2211.91	3	8364.46	6024.83	3	3546.29	5941.72	3	4176.85	748.674	3	5.38669	4.26802	3	3.99806	4.35031	3	-0.0146	0.088257	3	0.007884	0.0498225	3	-47	6.8	3	-82	12.3	3
	-9117.23	2424.32	3	-11061.6	1546.86	3	12663.5	2211.91	3	13557.8	1534.78	3	3546.29	5941.72	3	2496.18	441.866	3	5.38669	4.26802	3	2.69388	4.34476	3	0.07373	0.0350765	3	0.0802635	0.028397	3	-47	6.8	3	-120	11.8	3
	-10940.7	3587.52	3	-1303.69	1460.7	3	12157	3352.78	3	7583.16	4282.3	3	1216.3	2060.91	3	6279.48	947.481	3	4.92557	6.48384	3	4.36152	5.03476	3	0.0157143	0.0903568	3	1.02143	1.52514	3	-56	10.1	3	-91	11.3	3
	-10940.7	3587.52	3	-13155.4	4763.14	3	12157	3352.78	3	16131.5	7799.71	3	1216.3	2060.91	3	2976.06	692.554	3	4.92557	6.48384	3	2.5656	2.16779	3	0.0235714	0.135535	3	2.12143	3.16759	3	-56	10.1	3	-128	14.2	3
	-11180.6	6822.77	3	-2014.79	1143.15	3	12213.3	5829.31	3	13236.1	2169.8	3	1032.65	1588.59	3	11221.3	1545.63	3	6.95868	1.15326	3	1.1759	1.45647	3	0.0235714	0.135535	3	0.801429	1.19664	3	-38	7.6	3	-73	10.3	3
	-11180.6	6822.77	3	-13708.5	4128.05	3	12213.3	5829.31	3	16774.9	6880.91	3	1032.65	1588.59	3	3066.4	896.277	3	6.95868	1.15326	3	1.09038	2.18227	3	0.0157143	0.0903568	3	0.0172857	0.02581	3	-38	7.6	3	-112	15.2	3
	-7247.13	2100.96	3	-4029.58	3302.44	3	6440.29	2181.35	3	16039.5	7252.72	3	-806.838	461.405	3	12010	2892.38	3	10.8663	5.33941	3	1.86941	2.12646	3	0.0188571	0.108428	3	0.0204286	0.0305027	3	-44	6.8	3	-79	12.3	3
	-7247.13	2100.96	3	-4582.66	1206.66	3	6440.29	2181.35	3	24633.8	2489.53	3	-806.838	461.405	3	20051.1	2691.2	3	10.8663	5.33941	3	1.22478	3.4038	3	0.0125714	0.0722854	3	0.0141429	0.0211173	3	-44	6.8	3	-116	11.8	3
	-7369.27	746.959	3	-3516.01	4890.16	3	11939.3	4483.71	3	16131.5	7799.71	3	4570.03	2072.51	3	12615.5	3401.87	3	9.95273	3.61094	3	1.45577	2.25239	3	0.0125714	0.0722854	3	0.0141429	0.0211173	3	-50	6.8	3	-85	12.3	3
	-7369.27	746.959	3	-4661.67	1270.17	3	11939.3	4483.71	3	23301	3584.45	3	4570.03	2072.51	3	18639.3	3134.05	3	9.95273	3.61094	3	1.00454	1.23918	3	0.0227857	0.131017	3	2.10571	3.14412	3	-50	6.8	3	-120	11.8	3
	-7939.27	2111.97	3	-3674.03	3492.97	3	12286.1	4228.11	3	22335.9	5098	3	4346.82	1600.24	3	18661.8	3804.37	3	10.2412	7.09379	3	0.961562	1.17811	3	0.0919286	0.528587	3	0.870571	1.29988	3	-38	5.41257	3	-73	7.31953	3
	-7939.27	2111.97	3	-4859.2	1397.19	3	12286.1	2603.85	3	23071.2	3447.71	3	4346.82	1600.24	3	18212	4028.23	3	10.2412	7.09379	3	0.456608	1.53139	3	0.0534286	0.307213	3	0.0579857	0.0865808	3	-38	5.41257	3	-112	10.7566	3
	-8294.39	1642.47	3	-4116.49	2228.17	3	9925.3	1567.01	3	11818.2	4651.05	3	1587.38	3333.55	3	7701.75	1365.15	3	7.7977	3.35141	3	3.04017	2.57693	3	0.240429	1.38246	3	0.883143	1.31866	3	-45.68	4.84282	3	-80.65	8.74079	3
	-8294.39	1642.47	3	-7951.71	991.199	3	9925.3	1567.01	3	18874.3	1436.98	3	1456.79	3333.55	3	10922.6	1312.05	3	7.7977	3.35141	3	1.98871	2.78814	3	0.0191714	0.110235	3	0.0306429	0.0457541	3	-45.68	4.84282	3	-118.08	8.35053	3
	-9369.26	2035.72	3	-2299.23	2342.63	3	12061.2	2723.47	3	11429.9	4226.87	3	2691.94	1470.9	3	9130.66	1617.11	3	7.13752	3.96335	3	3.05393	2.94879	3	0.0477714	0.274685	3	0.216857	0.323798	3	-53.36	6.39862	3	-88.3	8.32241	3
	-9369.26	2035.72	3	-9078.41	2550.77	3	12061.2	2723.47	3	19572.8	4405.7	3	2691.94	1470.9	3	10494.4	1546.85	3	7.13752	3.96335	3	1.81629	1.27456	3	0.0545286	0.313538	3	0.0358286	0.0534971	3	-53.36	6.39862	3	-124.16	9.30615	3
	-9754.42	3932.13	3	-2761.45	1692.92	3	12245.3	3757.31	3	17331	2585.94	3	2490.89	1134.54	3	14569.5	1911.41	3	8.40299	3.18738	3	1.07945	0.9606	3	0.0847	0.487023	3	0.0616	0.0919774	3	-38	7.6	3	-73	10.3	3
	-9754.42	3932.13	3	-9460.83	2248.91	3	12245.3	3459.62	3	19797.1	3942.24	3	2490.89	1134.54	3	10336.3	1988.93	3	8.40299	3.18738	3	0.786169	1.35205	3	0.619759	0.319372	18	0.857605	1.85453	18	-38	7.6	3	-112	15.2	3
	-9117.23	2424.32	3	-11061.6	12004.4	3	12663.5	2011.76	3	13557.8	1534.78	3	3546.29	5941.72	3	2496.18	441.866	3	107.852	101.115	6	11.097	12.9128	6	0.619759	0.319372	18	1.25782	0.639591	18	-47	6.8	3	-82	12.3	3
	-10940.7	3587.52	3	-13155.4	5176.94	3	12157	3352.78	3	16499.1	2145.49	3	1216.3	2060.91	3	3343.73	717.823	3	107.852	101.115	6	23.3722	23.1166	6	0.32108	0.194946	18	1.09773	0.533871	18	-47	6.8	3	-120	11.8	3
	-7247.13	2100.96	3	-4582.66	1321.56	3	6440.29	2181.35	3	24633.8	2489.53	3	-806.838	1429.05	3	20051.1	2691.2	3	131.4	146.495	3	38.8	145.004	3	0.32108	0.194946	18	0.697519	0.315144	18	-56	10.1	3	-91	11.3	3
	-7369.27	746.959	3	-4661.67	1389.64	3	11939.3	4483.71	3	23301	3584.45	3	4570.03	7489.89	3	18639.3	3134.05	3	131.4	146.495	3	1.4	5.2321	3	0.634693	0.128564	21	0.754692	0.358647	21	-56	10.1	3	-128	14.2	3
	-8294.39	1642.47	3	-8210.87	6747.56	3	9925.3	1480	3	18431.2	1392.33	3	1630.91	3386.26	3	10220.4	1209.71	3	131.4	146.495	3	3.6	13.454	3	0.634693	0.128564	21	0.777562	0.424217	21	-38	7.6	3	-73	10.3	3
	-9369.26	2035.72	3	-9418.16	2962.86	3	12061.2	2723.47	3	19491.9	1982.67	3	2691.94	3491.8	3	10073.8	1436.38	3	256	285.409	3	-0.4	1.49489	3	0.2	0.519615	3	0.9	1.03923	3	-38	7.6	3	-112	15.2	3
	-30804.4	7508.69	48	-23917.1	4465.22	48	25786.5	7450.75	48	19674.2	4051.36	48	-5017.91	931.026	48	-4242.87	1877.41	48	580	646.63	3	0.533333	1.99318	3	0.3	0.866025	3	0.7	0.866025	3	-44	6.8	3	-79	12.3	3
	-30804.4	7508.69	48	-22424.6	7078.09	48	25786.5	7450.75	48	34101.6	6764.05	48	-5017.91	931.026	48	11677	2084.92	48	78.6667	87.7038	3	34.6667	129.557	3	0.2	0.519615	3	0.6	0.519615	3	-44	6.8	3	-116	11.8	3
	-39843.5	12909.5	66	-35035.8	6481.98	66	35408.6	12878.7	66	26888.1	6047.87	66	-4434.92	891.261	66	-8147.64	2332.23	66	32	35.6761	3	14.6667	54.8125	3	0.3	0.866025	3	0.4	0.69282	3	-50	6.8	3	-85	12.3	3
	-39843.5	12909.5	66	-47094.8	13325.7	66	35408.6	12878.7	66	52464.1	12723.4	66	-4434.92	891.261	66	5369.32	3960.99	66	277.333	309.193	3	0.04	0.149489	3	0.2	0.519615	3	0.3	0.519615	3	-50	6.8	3	-120	11.8	3
	-16584.2	3505.6	57	-18655.5	9333.84	57	12315.9	3346.19	57	12460.3	2060.22	57	-4268.27	1045.12	57	-6195.25	9103.63	57	326.667	364.194	3	-0.106667	0.398636	3	0.3	0.866025	3	0.4	1.03923	3	-38	5.41257	3	-73	7.31953	3
	-16584.2	3505.6	57	-16893.3	9325.42	57	12315.9	3346.19	57	11148.6	2042.05	57	-4268.27	1045.12	57	-5744.72	9099.1	57	100.8	112.38	3	1.06667	3.98636	3	1	1.58114	10	2	2.84605	10	-38	5.41257	3	-112	10.7566	3
	-17643	3122.52	3	-18545.3	1220.59	3	12121	2737.69	3	14804.6	2182.17	3	2000	5999.31	3	-6800	6481.37	3	93.0667	103.758	3	0.133333	0.498296	3	1	1.58114	10	2	4.42719	10	-45.68	4.84282	3	-80.65	8.74079	3
	-16723.6	2362.8	3	-16792.7	2297.57	3	10565.6	3177.88	3	13251	2768.3	3	2000	5999.31	3	-6800	6481.37	3	24	26.7571	3	7.86667	29.3994	3	1	1.58114	10	11	13.914	10	-45.68	4.84282	3	-118.08	8.35053	3
	-13221.3	5835.69	3	-13858	8055.43	3	9278.44	3665.3	3	8910.19	4926.31	3	2000	5999.31	3	-8000	7625.14	3	24.1333	26.9058	3	8.4	31.3926	3	1	1.58114	10	6	8.53815	10	-53.36	6.39862	3	-88.3	8.32241	3
	-12433.2	4080.1	3	-12839.1	6079.75	3	8581.22	3466.47	3	7630.77	3659.78	3	2000	5999.31	3	-8000	7625.14	3	59.4667	66.2982	3	27.3333	102.151	3	9.3513	53.7698	3	12.2658	18.3146	3	-53.36	6.39862	3	-124.16	9.30615	3
	-252.976	61.6782	1	-259.329	96.5401	1	243.003	69.8942	1	278.682	73.1236	1	2000	5999.31	3	-2000	1906.29	3	50.8	56.6359	3	28.1333	105.14	3	10.4444	60.0552	3	19.2891	28.8013	3	-38	7.6	3	-112	15.2	3
	-270.833	66.032	1	-301.007	112.056	1	252.07	72.5022	1	294.164	77.186	1	2000	5999.31	3	-1999	1905.33	3	214.332	127.053	18	74.8075	46.8441	18	-0.173934	1.66057	46	6.65171	10.9571	73	-47	6.8	3	-120	11.8	3
	-241.071	58.7757	1	-271.678	101.137	1	217.614	62.5918	1	295.884	77.6374	1	25.2371	75.7027	3	227.91	217.23	3	214.332	127.053	18	3.70133	11.1661	18	0.0429261	0.246824	46	38.026	56.7781	66	-38	7.6	3	-112	15.2	3
	-1190.89	8.17281	4	-1647.11	42.2133	4	1173.65	59.3123	4	1113.34	77.0302	4	826.516	2479.26	3	-2686.08	2560.22	3	319.225	121.193	18	222.58	146.248	18	0.0047842	0.0576517	3	2.86685	1.86115	3	-44	6.8	3	-116	11.8	3
	-1587.86	7.47228	4	-1598.67	44.3367	4	1001.9	31.5355	4	1031.87	95.9155	4	-870.681	2611.74	3	-911.638	868.922	3	319.225	121.193	18	5.4661	11.3953	18	0.0291212	0.0686594	3	0.105118	0.107406	3	-38	5.41257	3	-112	10.8251	3
	-1541.16	7.23877	4	-2325.33	61.9656	4	1345.41	87.6958	4	1031.87	302.961	4	82.0207	246.034	3	-4541.91	4329.09	3	440.083	113.403	21	251.769	162.143	21	0.0197973	0.0940974	3	0.0244876	0.0508954	3	-45.68	4.84282	3	-118.24	8.40372	3
	-2129.6	6.82564	4	-2860.46	83.0417	4	1355.54	118.505	4	1460.5	101.186	4	-6476.66	2851.85	3	303.8	833.876	3	440.083	113.403	21	25.5501	18.734	21	-0.106057	0.284071	3	-0.0117986	0.0464642	3	-4.5	2.76586	2	-18.45	8.95056	2
	-2259.29	13.6513	4	-1940.01	56.0709	4	1857.59	103.363	4	1587.5	105.691	4	-5712.15	3273.21	3	-61.3951	529.414	3	106	76.5566	3	1	2.07846	3	-0.0422778	0.12134	3	0.0489751	0.136101	3	-4.5	2.76586	2	-14.3	4.27931	2
	-27659.6	2920.59	3	-19692.3	1592.44	3	26436.6	3571.72	3	20646.2	1492.98	3	-5522.05	3799.05	3	-3740.72	3396.35	3	122	57.8505	3	0	2.42487	3	-0.00424229	0.153457	3	0.111307	0.1044	3	-9	3.66747	3	-15	3.40221	3
	-13417.4	2514	3	-10261.1	928.26	3	12328	1844.65	3	10779.5	1426.08	3	-6157.98	2847.63	3	-3541.64	2451.05	3	106	76.5566	3	4	4.15692	3	-0.0530286	0.144354	3	-0.00756888	0.0363468	3	-9	3.66747	3	-21	4.7631	3
	-13830.8	2274.67	3	-66220.4	9098.67	3	8766.07	227.467	3	41998.1	6824	3	-3942.85	3165.22	3	-4947.83	674.984	3	122	57.8505	3	5	6.9282	3	-0.00212114	0.110349	3	0.00601058	0.0540245	3	-9	3.66747	3	-26	5.89717	3
													-3852.02	1523.88	3	-5208.29	1132.68	3	106	76.5566	3	5	3.2909	3	0.047842	0.0441064	3	0.828201	0.596625	3	-2.8	0.72	3	-23.33	3.46	3
													2799.24	1473.96	20	6964.24	2472.92	20	122	57.8505	3	16	12.2976	3	0.270411	0.176375	3	1.01932	0.853637	3	-5.04	1.83	3	-37.3	7.39	3
													-1484.7	4453.59	1	390.71	372.403	1	51	61.032	3	5	6.00833	10	0.0848457	0.231507	3	0.164734	0.183376	3	-11.68	1.82	3	-20.88	1.28	3
													-1316.39	3948.73	1	54.0984	51.5635	1	101	133.448	3	13	25.9307	10	0.0777752	0.210379	3	0.0400706	0.0157963	3	-20.85	5.42	3	-21.08	7.29	3
													-1484.7	4453.59	1	847.541	807.828	1	51	61.032	3	1	5.6921	10	0.0836749	0.222676	3	0.106855	0.121909	3	-27.34	6.04	3	-42.07	2.04	3
													-2037.7	6112.41	1	-571.038	544.281	1	101	133.448	3	17	24.982	10	-0.0120198	0.0651236	3	0.0289398	0.0625671	3	-2.62	0.79	3	-21.88	3.76	3
													30.7693	92.2972	1	-12.0403	11.4761	1	2.91752	16.5072	8	-0.303332	3.49392	8	0.314286	1.80714	3	14.6143	21.8212	3	-6.51	2.28	3	-46.73	5.78	3
													-9.97348	29.917	1	19.3526	18.4458	1	11.7958	13.1509	3	0.268127	1.00205	3	0.314286	1.80714	3	12.2571	18.3016	3	-10.75	1.853	3	-20.14	1.87	3
													-18.7634	56.2836	1	-6.84293	6.52229	1	14.6619	16.3462	3	4.25786	15.9125	3	-0.355362	38.2508	46	20.1997	184.053	53	-24.62	6.88	3	-23.22	6.41	3
													-23.4571	70.3631	1	24.2062	23.072	1	5.10843	5.69529	3	-0.69713	2.60533	3							-6.95	1.41	3	-21.5	1.76	3
													-17.2407	1.89941	4	-533.774	650.201	4	8.2133	9.15684	3	3.0352	11.3432	3							-14.43	3.89	3	-28.3	4.55	3
													-585.96	247.144	4	-566.793	690.439	4	157.557	48.6786	3	113.183	73.207	3							-27.34	6.04	3	-42.07	2.04	3
													-195.75	14.3335	4	-1293.46	1575.6	4	20.3724	47.0833	3	23.1893	55.9066	3							-27.34	6.04	3	-42.07	2.04	3
													-774.063	326.742	4	-1399.96	96.0056	4	155.827	23.0327	3	112.446	45.444	3							-2.62	0.79	3	-21.88	3.76	3
													-401.699	32.1727	4	-352.516	429.437	4	26.091	4.51266	3	36.8004	16.1831	3							-6.51	2.28	3	-46.73	5.78	3
													-1222.99	291.57	3	953.912	1166.16	3	463.275	273.827	10	96.9548	59.1584	10							-10.75	1.853	3	-20.14	1.87	3
													-1089.44	396.381	3	518.321	639.041	3	-3.47023	1.96453	10	5.03661	17.8738	10							-24.62	6.88	3	-23.22	6.41	3
													-4783.77	1766.98	3	-17987	3327.11	3	576.058	329.182	4	132.211	124.136	4							-6.95	1.41	3	-21.5	1.76	3
																			-5.20534	2.21819	4	-1.25915	2.6243	4							-14.43	3.89	3	-28.3	4.55	3
																			34.7023	38.6889	10	27.7014	103.526	10							-7.08	2.88507	18	-15.22	3.45211	18
																			679.547	860.059	46	15.6518	24.3855	73							-7.08	2.88507	18	-36.11	8.19026	18
																			70.8246	78.9608	46	-0.125893	0.470489	66							-12.04	4.90626	18	-15.22	3.45211	18
																			9.75292	10.6162	20	0.0153628	0.605445	20							-12.04	4.90626	18	-24.07	5.45941	18
																			93.1	103.795	18	32.8	122.581	18							-4.96	2.02118	21	-10.09	2.28855	21
																			82.2	91.6431	15	27.8	103.895	15							-4.96	2.02118	21	-14.16	3.21169	21
																			57.9	64.5515	18	31.7	118.47	18							-6.89273	1.33282	3	-25.7648	2.38063	3
																			38.4	42.8114	12	22.1	82.5925	12							-7.25457	1.35312	3	-28.5965	2.27856	3
																			78.1	87.0721	17	34.9	130.429	18							-6.89273	1.33282	3	-20.42	3.03	3
																			53.5	59.646	15	34.5	128.934	15							-7.25457	1.35312	3	-22.46	2.21	3
																			43.6	48.6087	18	14.1	52.6947	18							-6.89273	1.33282	3	-16.0703	1.17265	3
																			24.4	27.2031	29	5.6	20.9284	33							-7.25457	1.35312	3	-18.4041	1.46528	3
																			19.7	21.9631	18	10.7	39.9882	18							-0.59	1.75	4	-18.99	2.77	4
																			19.9	22.1861	12	11.3	42.2305	12							-2.05	1.38	4	-16.7	1.42	4
																			220.49	245.82	18	-0.5	1.86861	18							-0.59	1.75	4	-17.33	1.8	4
																			395.8	441.269	12	0.2	0.747443	15							-2.05	1.38	4	-21.37	1.45	4
																			180.3	201.013	18	0.2	0.747443	18							-18	7.33494	3	-37	8.39212	3
																			22.6	25.1963	15	0.03	0.112116	15							-7.1183	2.08967	3	-41.4205	4.05138	3
																			23.9	26.6456	10	8.7	32.5138	15							-23.3252	9.13452	3	-50.2483	5.54088	3
																			193.622	614.147	8	-17.3994	20.7273	8							-5.991	3.13385	3	-25.0356	3.35766	3
																			13.001	49.0212	8	-4.32353	9.62287	8							-28.4567	9.41794	3	-19.0235	6.07915	3
																			92.5362	343.166	8	-4.32353	4.23689	8							-8.1	1.2	3	-13.1	0.8	3
																			68	56.9828	4	16	88.274	4							-20.4	2.3	3	-28.4	3.2	3
																			68	56.9828	4	40	220.685	4							-8.1	1.2	3	-13.1	0.8	3
																			441.333	369.829	4	0	0	4							-20.4	2.3	3	-28.4	3.2	3
																			94.0395	104.843	1	47.8505	178.828	1							3	3	10	4	2	10
																			84.0706	93.7286	1	46.8536	175.102	1							-19	4	10	-17	7	10
																			100.353	111.882	1	50.1765	187.521	1							3	3	10	4	2	10
																			507.984	309.251	8	12.7651	23.8124	4							-19	4	10	-17	7	10
																			198.667	221.489	3	2.8	10.4642	3							-15	13	9836	-22	10	11052
																			345.333	385.005	3	1.33333	4.98296	3							-15	13	9836	-68	23	11052
																			1231.85	2386.96	46	23.7789	31.0429	53							-11	4.48246	3	-23	5.21672	3
																															-11	4.48246	3	-23	5.21672	3
																															-15	6.11245	3	-20	4.53628	3
																															-15	6.11245	3	-20	4.53628	3
																															-12	4.88996	3	-14	3.1754	3
																															-12	4.88996	3	-14	3.1754	3
																															-22	8.96492	3	-31	7.03124	3
																															-22	8.96492	3	-31	7.03124	3
																															-2	0.814993	3	-30	6.80442	3
																															-2	0.814993	3	-30	6.80442	3
																															-20	8.14993	3	-36	8.16531	3
																															-20	8.14993	3	-36	8.16531	3
																															-16	6.51994	3	-43	9.753	3
																															-16	6.51994	3	-21	4.7631	3
																															-16	6.51994	3	-21	4.7631	3
																															-4	1.62999	3	-31	7.03124	3
																															-21	8.55742	3	-38	8.61893	3
																															0	0	3	-50	11.3407	3
																															-28	11.4099	3	-36	8.16531	3
																															-18	7.33494	3	-24	5.44354	3
																															-11	4.48246	3	-13	2.94858	3
																															-16	6.51994	3	-20	4.53628	3
																															-12	4.88996	3	-27	6.12398	3
																															-4	1.62999	3	-31	7.03124	3
																															-21	8.55742	3	-38	8.61893	3
																															0	0	3	-50	11.3407	3
																															-28	11.4099	3	-36	8.16531	3
																															-18	7.33494	3	-24	5.44354	3
																															-11	4.48246	3	-13	2.94858	3
																															-16	6.51994	3	-20	4.53628	3
																															-12	4.88996	3	-27	6.12398	3
																															0	0	20	-15	3.40221	20
																															-7.2	5.7	18	-22.1	8.6	18
																															-18.7	7.2	15	-34.5	9.3	15
																															-10.3	8	18	-20.6	9.7	18
																															-27.8	9.3	12	-31.9	7.5	12
																															-7.1	4.7	17	-11.8	6.6	18
																															-16.6	8.2	15	-17.1	11.3	15
																															-12.6	7.6	18	-18	8.5	18
																															-26.2	12.1	29	-30	11.2	33
																															-17.1	5.2	18	-28.9	7.5	18
																															-38.9	9.4	12	-44.7	8.9	12
																															-2.5	2.3	18	-30.1	13.9	18
																															-5.9	4.8	12	-39.7	17.8	15
																															-8.3	7.5	18	-32	17.2	18
																															-32.8	14.8	15	-48.3	15.3	15
																															-27.5	13.7	10	-43.3	10.7	15
																															-22.8356	9.30542	8	-45.1873	10.2491	8
																															-45.6479	18.6014	8	-90.9915	20.6381	8
																															-18.9124	7.70674	8	-40.306	9.14197	8
																															-16	6.51994	4	-21	4.7631	4
																															-15	6.11245	4	-20	4.53628	4
																															-2	0.814993	4	-30	6.80442	4
																															8.68885	0.945968	8	-10.5442	3.10953	8
																															-8.1	1.2	3	-13.1	0.8	3
																															-20.4	2.3	3	-28.4	3.2	3
																															-15	13	9836	-55	15	14736
																															-17.3	2.25167	3	-21.9	3.4641	3
Mean	-12422.6	1511.18	47	-11609.7	1874.84	47	11916.3	1198.69	47	15688	1540.21	47	-420.84	454.667	65	2527.99	1028.12	65	130.405	18.8758	98	21.5073	4.42626	98	0.53055	0.246739	56	3.04473	0.895398	56	-21.5663	1.34119	155	-47.2248	2.92996	155
minerotrophic	-40736.3	9264.57	6	-30951.1	7720.48	6	23661.8	8127.26	6	17959.9	6049.92	6	-2080	200	4	-720	580	4	155.93	91.89	3	-0.52095	0.420619	3	0.0932169	0.205535	3	1.16346	0.389226	3	11.41	3.12165	4	-91.8	9.7	4
	-29498.7	5661.68	6	-23758.3	4117.59	6	24809.1	6528.42	6	21625.2	4944.44	6	-2080	200	4	-1200	800	4	155.93	91.89	3	-0.5015	0.69632	3	0.0932169	0.205535	3	1.61772	0.538782	3	5.655	3.80894	4	-105	8.1	4
	-30804.4	7508.69	48	-23917.1	4465.22	48	25786.5	7450.75	48	19674.2	4051.36	48	-17074.5	1832.4	6	-12991.2	15856.4	6	155.93	91.89	3	-0.613	0.526	3	0.109127	0.239511	3	1.87111	1.14387	3	-31.375	10.768	4	-57.38	9.45	4
	-30804.4	7508.69	48	-22424.6	7078.09	48	25786.5	7450.75	48	34101.6	6764.05	48	-4689.64	822.558	6	-2133.05	2649.35	6	155.93	91.89	3	-0.35	0.701	3	0.109127	0.239511	3	0.267302	0.160211	3	-6.17	1.6	3	-32.34	1.06	3
	-39843.5	12909.5	66	-35035.8	6481.98	66	35408.6	12878.7	66	26888.1	6047.87	66	-5017.91	931.026	48	-4242.87	1877.41	48	155.93	91.89	3	-0.964	0.263	3	0.109127	0.239511	3	1.63054	0.966164	3	-6.17	1.6	3	-37.89	1.4	3
	-39843.5	12909.5	66	-47094.8	13325.7	66	35408.6	12878.7	66	52464.1	12723.4	66	-5017.91	931.026	48	11677	2084.92	48	155.93	91.89	3	0.35	1.927	3	0.109127	0.239511	3	2.11168	0.984942	3	-20.33	2.57	3	-32.34	1.06	3
	-16584.2	3505.6	57	-18655.5	9333.84	57	12315.9	3346.19	57	12460.3	2060.22	57	-4434.92	891.261	66	-8147.64	2332.23	66	77.6798	41.1094	3	1.31787	0.996826	3	-0.101835	0.063291	3	2.96318	0.679484	3	-20.33	2.57	3	-37.89	1.4	3
	-16584.2	3505.6	57	-16893.3	9325.42	57	12315.9	3346.19	57	11148.6	2042.05	57	-4434.92	891.261	66	5369.32	3960.99	66	77.6798	41.1094	3	-1.09987	0.821474	3	0.028689	0.0472675	3	0.803	0.225132	3	-6.17	1.6	3	-40	0	3
	-17120.4	4174.14	1	-14041.4	5227.16	1	12896.2	3709.29	1	14385.7	3774.67	1	-4268.27	1045.12	57	-6195.25	9103.63	57	80.9305	80.9275	3	-0.14922	1.92423	3	0.123163	1.53286	3	0.374147	1.1113	3	-6.17	1.6	3	-14.4755	3.48287	3
	-15725.8	3834.11	1	-16611.2	6183.85	1	12587.5	3620.51	1	17012.8	4464	1	-4268.27	1045.12	57	-5744.72	9099.1	57	80.9305	80.9275	3	2.50126	2.38319	3	0.0157143	0.0903568	3	1.02143	1.52514	3	-6.17	1.6	3	-40	0	3
	-17643	3122.52	3	-18545.3	1220.59	3	12121	2737.69	3	14804.6	2182.17	3	-100	270	16	-910	180	2	80.9305	80.9275	3	-2.9015	2.23862	3	0.0235714	0.135535	3	2.12143	3.16759	3	-6.17	1.6	3	-31.7101	5.4726	3
	-16723.6	2362.8	3	-16792.7	2297.57	3	10565.6	3177.88	3	13251	2768.3	3	-77.5	262.393	16	1790	2340	4	80.9305	80.9275	3	1.14015	0.605658	3	0.0235714	0.135535	3	0.801429	1.19664	3	-20.33	2.57	3	-40	0	3
	-13221.3	5835.69	3	-13858	8055.43	3	9278.44	3665.3	3	8910.19	4926.31	3	-77.5	262.393	16	1700	2340	3	1212.3	324.686	9	4.80305	10.1006	9	-0.0963265	0.0540294	3	1.54547	0.289318	3	-20.33	2.57	3	-14.4755	3.48287	3
	-12433.2	4080.1	3	-12839.1	6079.75	3	8581.22	3466.47	3	7630.77	3659.78	3	25.2371	75.7027	3	227.91	217.23	3	2106.5	550.27	12	-0.369466	0.858462	12	-0.404403	1.16002	24	0.414401	1.31789	15	-20.33	2.57	3	-40	0	3
	-252.976	61.6782	1	-259.329	96.5401	1	243.003	69.8942	1	278.682	73.1236	1	826.516	2479.26	3	-2686.08	2560.22	3	382.1	116.458	9	31.0351	65.3585	9	0.0227857	0.131017	3	2.10571	3.14412	3	-20.33	2.57	3	-31.7101	5.4726	3
	-270.833	66.032	1	-301.007	112.056	1	252.07	72.5022	1	294.164	77.186	1	-870.681	2611.74	3	-911.638	868.922	3	60.9422	16.4004	12	31.0351	65.3585	12	0.0919286	0.528587	3	0.870571	1.29988	3	-9	3.66747	3	-15	3.40221	3
	-241.071	58.7757	1	-271.678	101.137	1	217.614	62.5918	1	295.884	77.6374	1	82.0207	246.034	3	-4541.91	4329.09	3	76.5986	97.385	3	1.28814	5.04394	3	0.0534286	0.307213	3	0.0579857	0.0865808	3	-9	3.66747	3	-21	4.7631	3
	-1190.89	8.17281	4	-1647.11	42.2133	4	1173.65	59.3123	4	1113.34	77.0302	4	-6476.66	2851.85	3	303.8	833.876	3	76.5986	97.385	3	-0.990878	2.11119	3	0.240429	1.38246	3	0.883143	1.31866	3	-9	3.66747	3	-26	5.89717	3
	-1587.86	7.47228	4	-1598.67	44.3367	4	1001.9	31.5355	4	1031.87	95.9155	4	-5712.15	3273.21	3	-61.3951	529.414	3	3.31045	3.22256	3	0.972568	5.00563	3	1.81938	10.4614	3	1.43821	2.14745	3	-2.8	0.72	3	-23.33	3.46	3
	-1541.16	7.23877	4	-2325.33	61.9656	4	1345.41	87.6958	4	1031.87	302.961	4	-4224.28	12671.4	1	344.326	328.192	1	3.31045	3.22256	3	-0.748129	2.05654	3	1.10722	6.36652	3	6.6686	9.95714	3	-5.04	1.83	3	-37.3	7.39	3
	-2129.6	6.82564	4	-2860.46	83.0417	4	1355.54	118.505	4	1460.5	101.186	4	-3138.29	9413.79	1	401.537	382.722	1	69.1892	105.74	3	0.20126	3.76732	3	0.53232	3.06082	3	2.10397	3.14153	3	-26.8	10.9209	3	-62.1	14.0852	3
	-2259.29	13.6513	4	-1940.01	56.0709	4	1857.59	103.363	4	1587.5	105.691	4	-5522.05	3799.05	3	-3740.72	3396.35	3	69.1892	105.74	3	3.60831	8.77628	3	0.584802	3.3626	3	2.82505	4.2182	3	-27.34	6.04	3	-42.07	2.04	3
	-27659.6	2920.59	3	-19692.3	1592.44	3	26436.6	3571.72	3	20646.2	1492.98	3	-6157.98	2847.63	3	-3541.64	2451.05	3	69.1892	105.74	3	-2.34325	2.17251	3	0.0722617	0.415503	3	1.56147	2.3315	3	-2.62	0.79	3	-21.88	3.76	3
	-13417.4	2514	3	-10261.1	928.26	3	12328	1844.65	3	10779.5	1426.08	3	-3942.85	3165.22	3	-4947.83	674.984	3	69.1892	105.74	3	1.96948	4.47045	3	1.068	6.14097	3	1.97459	2.94833	3	-6.51	2.28	3	-46.73	5.78	3
	-7090	1524.2	3	-18490	3689.27	3	7020	1299.04	3	23060	2424.87	3	-3852.02	1523.88	3	-5208.29	1132.68	3	3.35183	3.21266	3	0.157107	2.94067	3	0.352375	2.02615	3	2.90729	4.34099	3	3.33333	1.52753	3	-18.1	5.6	3
	-6290	1316.36	3	-19210	3290.9	3	5020	917.987	3	24030	2459.51	3	-1484.7	4453.59	1	390.71	372.403	1	3.35183	3.21266	3	2.81671	12.1107	3	0.23227	1.33555	3	3.19393	4.76898	3	6.52	6.22	4	-36.47	14.77	4
	-38630	9418.4	1	-35990	880	1	37280	1760	1	35670	670	1	-1316.39	3948.73	1	54.0984	51.5635	1	3.35183	3.21266	3	-1.82918	1.6562	3	0.0727753	0.418456	3	1.91761	2.86326	3	-27.34	6.04	3	-42.07	2.04	3
													-1484.7	4453.59	1	847.541	807.828	1	3.35183	3.21266	3	1.53741	3.47621	3	0.31635	1.819	3	3.54269	5.28973	3	-27.34	6.04	3	-42.07	2.04	3
													-2037.7	6112.41	1	-571.038	544.281	1	155.371	42.7092	6	185.222	44.6467	6	0.0216785	0.124651	3	1.41952	2.11955	3	-2.62	0.79	3	-21.88	3.76	3
													30.7693	92.2972	1	-12.0403	11.4761	1	12.1217	3.29588	6	18.3903	4.91263	6	0.0628234	0.361233	3	2.46823	3.68541	3	-6.51	2.28	3	-46.73	5.78	3
													-9.97348	29.917	1	19.3526	18.4458	1	131.4	146.495	3	38.8	145.004	3	2.00132	11.5076	3	3.11612	4.6528	3	22	8.96492	3	-35	7.93849	3
													-18.7634	56.2836	1	-6.84293	6.52229	1	131.4	146.495	3	1.4	5.2321	3	2.05627	11.8235	3	3.95948	5.91205	3	18	7.33494	3	-25	5.67035	3
													-23.4571	70.3631	1	24.2062	23.072	1	131.4	146.495	3	3.6	13.454	3	0.144523	0.831006	3	2.27124	3.39127	3	14	5.70495	3	-31	7.03124	3
													-17.2407	1.89941	4	-533.774	650.201	4	256	285.409	3	-0.4	1.49489	3	0.251294	1.44493	3	2.71505	4.05395	3	8	3.25997	3	-30	6.80442	3
													-585.96	247.144	4	-566.793	690.439	4	580	646.63	3	0.533333	1.99318	3	0.619759	0.319372	18	0.857605	1.85453	18	55	22.4123	3	-30	6.80442	3
													-195.75	14.3335	4	-1293.46	1575.6	4	29.565	10.6773	3	7.99188	0.8736	3	0.619759	0.319372	18	1.25782	0.639591	18	45	18.3373	3	-32	7.25805	3
													-774.063	326.742	4	-1399.96	96.0056	4	142.076	118.227	24	1.34264	1.8695	15	0.32108	0.194946	18	1.09773	0.533871	18	37	15.0774	3	-39	8.84575	3
													-401.699	32.1727	4	-352.516	429.437	4	277.333	309.193	3	0.04	0.149489	3	0.32108	0.194946	18	0.697519	0.315144	18	24	9.77991	3	-36	8.16531	3
													-1222.99	291.57	3	953.912	1166.16	3	326.667	364.194	3	-0.106667	0.398636	3	0.634693	0.128564	21	0.754692	0.358647	21	60	24.4498	3	-38	8.61893	3
													-1089.44	396.381	3	518.321	639.041	3	100.8	112.38	3	1.06667	3.98636	3	0.634693	0.128564	21	0.777562	0.424217	21	41	16.7074	3	-31	7.03124	3
													-655.75	1124.84	3	13852.5	8765.26	3	93.0667	103.758	3	0.133333	0.498296	3	0.43	0.86	17	3.42419	13.6968	44	65	26.4873	3	-38	8.61893	3
													-388.525	1170.6	3	10594.2	5864.68	3							0.215	0.95704	17	12.8407	31.6737	14	50	20.3748	3	-34	7.71168	3
													-1372.98	924.102	3	9692.62	5495.05	3							0.215	0.95704	17	17.1209	30.8177	5	15	6.11245	3	-35	7.93849	3
													-1372.98	924.102	3	17704.9	3753.22	3							-0.6525	0.0930706	4	0.6623	0.0612651	4	17	6.92744	3	-37	8.39212	3
													-80	2009.18	3	4580	4416.73	3							-0.6525	0.0930706	4	0.1247	0.0414502	4	43	17.5223	3	-31	7.03124	3
													-1270	1593.49	3	4820	4122.28	3							-0.6525	0.0930706	4	0.4203	0.0277308	4	40	16.2999	3	-30	6.80442	3
													-1350	2670	1	-320	1110	1							-0.3622	0.554237	4	-0.0285	0.0995691	4	-7.08	2.88507	18	-15.22	3.45211	18
																									-0.3622	0.554237	4	0.0821	0.0126396	4	-7.08	2.88507	18	-36.11	8.19026	18
																									-0.3622	0.554237	4	0.3004	0.0231864	4	-12.04	4.90626	18	-15.22	3.45211	18
																									2.10247	12.0892	4	6.80088	10.1547	4	-12.04	4.90626	18	-24.07	5.45941	18
																									0.692443	3.98153	4	1.89002	2.82207	4	-4.96	2.02118	21	-10.09	2.28855	21
																									0.692443	3.98153	4	1.20293	1.79615	4	-4.96	2.02118	21	-14.16	3.21169	21
																									0.692443	3.98153	4	1.54648	2.30911	4	-109	44.4171	4	-121	27.4445	4
																									1.07574	6.1855	4	1.01035	1.5086	4	-109	44.4171	4	-119	26.9909	4
																									9.3513	53.7698	3	12.2658	18.3146	3	-109	44.4171	4	-138	31.3003	4
																									10.4444	60.0552	3	19.2891	28.8013	3	-76	30.9697	4	-84	19.0524	4
																									0.801429	0.190526	3	1.52429	0.353833	3	-18	7.33494	3	-37	8.39212	3
																			214.332	127.053	18	74.8075	46.8441	18	0.801429	0.190526	3	1.46143	0.217744	3	-7.1183	2.08967	3	-41.4205	4.05138	3
[truncated: 1,337 more rows]
