# Supplementary material for: Declines of peatland water table forces climate warming despite methane emission drawdown
Source: Research Square preprint supplement (doi:10.21203/rs.3.rs-2839705/v1), 2023-05-08
Supplement: Supplementary file 7 [file ef7f30e59f2306d6743fb9f9.xlsx]

## Sheet: Nongrowing season flux of other
ID	References	Treatment	Purpose	Climatic conditions	Wetland type	Nutrient supply type	Microtopography	Permanently/seasonally flooded	Function group	N rate (kg N ha-1) in drained wetland	Biomass/manure application (t ha-1) in drained wetland	Peat depth (m) in pristine wetland	Country	Latitude (°, N)	Longitude (°, E)	Altitude (m)	MAT ( °C)	MAP (mm)	Climatic conditions	Drainage duration (years)	Drainage intensity	Wetland type	Nutrient supply type	Microtopography	Permanently/seasonally flooded	Dominant plant species in prestine wetland	Function group	Permafrost	Measurement period	Season	Dry/wet	Measurement frequency	Method	Annual soil CH4 flux	Control	SD	n	Treatment	SD	n	Growing season CH4 flux	Control	SD	n	Treatment	SD	n	Non-growing season CH4 flux	Control
1	Dise, 1993	Pristine	Pristine	Temperate	Peatland (bog)	ombrotrophic	overall	seasonally	Forest	0	0	/	USA	47.533	-93.467	/	3	770	Temperate	/	/	Peatland (bog)	ombrotrophic	overall	seasonally	Forest	Forest	No	1988–1989	Annual	/	Weekly to monthly	Field, Chamber	kg ha-1 yr-1	35.0667	/	3	/	/	3	kg ha-1 GS-1	28	/	3	/	/	3	kg ha-1 NGS-1	7.06667
2	Dise, 1993	Pristine	Pristine	Temperate	Peatland (fen)	ombrotrophic	overall	seasonally	Forest	0	0	/	USA	47.533	-93.467	/	3	770	Temperate	/	/	Peatland (fen)	ombrotrophic	overall	seasonally	Forest	Forest	No	1988–1989	Annual	/	Weekly to monthly	Field, Chamber	kg ha-1 yr-1	657.067	/	3	/	/	3	kg ha-1 GS-1	585.067	/	3	/	/	3	kg ha-1 NGS-1	72
3	Dise, 1993	Pristine	Pristine	Temperate	Peatland (bog)	ombrotrophic	overall	seasonally	Forest	0	0	/	USA	47.533	-93.467	/	3	770	Temperate	/	/	Peatland (bog)	ombrotrophic	overall	seasonally	Forest	Forest	No	1988–1989	Annual	/	Weekly to monthly	Field, Chamber	kg ha-1 yr-1	431.067	/	3	/	/	3	kg ha-1 GS-1	414	/	3	/	/	3	kg ha-1 NGS-1	17.0667
4	Dise, 1993	Pristine	Pristine	Temperate	Peatland (bog)	ombrotrophic	overall	seasonally	Forest	0	0	/	USA	47.533	-93.467	/	3	770	Temperate	/	/	Peatland (bog)	ombrotrophic	overall	seasonally	Forest	Forest	No	1988–1989	Annual	/	Weekly to monthly	Field, Chamber	kg ha-1 yr-1	138	/	3	/	/	3	kg ha-1 GS-1	116.933	/	3	/	/	3	kg ha-1 NGS-1	21.0667
5	Chu et al. 2014	Pristine	Pristine	Temperate	Marsh	minerotrophic	overall	permanently	Graminoid	0	0	/	USA	41.464	-82.996	/	12.1	1269	Temperate	/	/	Marsh	minerotrophic	overall	permanently	Graminoid	Graminoid	No	2011	Annual	/	Half-hourly to daily	EC	kg ha-1 yr-1	564	/	1	/	/	/	kg ha-1 GS-1	494.667	/	1	/	/	/	kg ha-1 NGS-1	69.3333
6	Chu et al. 2014	Pristine	Pristine	Temperate	Marsh	minerotrophic	overall	permanently	Graminoid	0	0	/	USA	41.464	-82.996	/	11.9	/	Temperate	/	/	Marsh	minerotrophic	overall	permanently	Graminoid	Graminoid	No	2012	Annual	/	Half-hourly to daily	EC	kg ha-1 yr-1	760	/	1	/	/	/	kg ha-1 GS-1	656	/	1	/	/	/	kg ha-1 NGS-1	104
7	Hommeltenberg et al. 2014	Pristine	Pristine	Temperate	Peatland (bog)	ombrotrophic	overall	seasonally	Peat moss	0	0	5.1	Germany	47.806	11.328	590	/	/	Temperate	/	/	Peatland (bog)	ombrotrophic	overall	seasonally	Peat moss	Peat moss	No	2012	Annual	/	Half-hourly to daily	EC	kg ha-1 yr-1	70.6667	/	1	/	/	/	kg ha-1 GS-1	59.4667	/	1	/	/	/	kg ha-1 NGS-1	11.2
8	Kang and Freeman, 2002	Pristine	Pristine	Temperate	Peatland (bog)	ombrotrophic	overall	seasonally	Peat moss	0	0	/	UK	52.996	-3.782	/	/	/	Temperate	/	/	Peatland (bog)	ombrotrophic	overall	seasonally	Peat moss	Peat moss	No	1996	Annual	/	Monthly	Field, Chamber	kg ha-1 yr-1	10.8382	1.90454	5	/	/	/	kg ha-1 GS-1	6.536	2.26879	5	/	/	/	kg ha-1 NGS-1	4.30221
9	Kang and Freeman, 2002	Pristine	Pristine	Temperate	Swamp	minerotrophic	overall	seasonally	Forest	0	0	/	UK	52.996	-3.782	/	/	/	Temperate	/	/	Swamp	minerotrophic	overall	seasonally	Forest	Forest	No	1996	Annual	/	Monthly	Field, Chamber	kg ha-1 yr-1	40.6643	24.393	5	/	/	/	kg ha-1 GS-1	1.47855	34.4956	5	/	/	/	kg ha-1 NGS-1	39.1857
10	Rinne et al. 2007	Pristine	Pristine	Boreal	Peatland (fen)	minerotrophic	overall	seasonally	Peat moss	0	0	4	Finland	60.833	24.2	/	3.3	713	Boreal	/	/	Peatland (fen)	minerotrophic	overall	seasonally	Peat moss	Peat moss	No	2005	Annual	/	Half-hourly to daily	EC	kg ha-1 yr-1	126	/	1	/	/	/	kg ha-1 GS-1	114.667	/	1	/	/	/	kg ha-1 NGS-1	11.3333
11	Whalen and Reeburgh, 1992	Pristine	Pristine	Boreal	Peatland (fen)	minerotrophic	overall	seasonally	Cyperaceae	0	0	/	USA	64.867	-147.85	/	/	/	Boreal	/	/	Peatland (fen)	minerotrophic	overall	seasonally	Cyperaceae	Cyperaceae	Yes	1987	Annual	/	Weekly	Field, Chamber	kg ha-1 yr-1	48.8	/	/	/	/	/	kg ha-1 GS-1	47.6	/	/	/	/	/	kg ha-1 NGS-1	1.2
12	Whalen and Reeburgh, 1992	Pristine	Pristine	Boreal	Peatland (fen)	minerotrophic	overall	seasonally	Cyperaceae	0	0	/	USA	64.867	-147.85	/	/	/	Boreal	/	/	Peatland (fen)	minerotrophic	overall	seasonally	Cyperaceae	Cyperaceae	Yes	1988	Annual	/	Weekly	Field, Chamber	kg ha-1 yr-1	8.13333	/	/	/	/	/	kg ha-1 GS-1	4.93333	/	/	/	/	/	kg ha-1 NGS-1	3.2
13	Whalen and Reeburgh, 1992	Pristine	Pristine	Boreal	Peatland (fen)	minerotrophic	overall	seasonally	Cyperaceae	0	0	/	USA	64.867	-147.85	/	/	/	Boreal	/	/	Peatland (fen)	minerotrophic	overall	seasonally	Cyperaceae	Cyperaceae	Yes	1989	Annual	/	Weekly	Field, Chamber	kg ha-1 yr-1	42.6667	/	/	/	/	/	kg ha-1 GS-1	31.8667	/	/	/	/	/	kg ha-1 NGS-1	10.8
14	Whalen and Reeburgh, 1992	Pristine	Pristine	Boreal	Peatland (fen)	minerotrophic	overall	seasonally	Cyperaceae	0	0	/	USA	64.867	-147.85	/	/	/	Boreal	/	/	Peatland (fen)	minerotrophic	overall	seasonally	Cyperaceae	Cyperaceae	Yes	1990	Annual	/	Weekly	Field, Chamber	kg ha-1 yr-1	606	/	/	/	/	/	kg ha-1 GS-1	587.467	/	/	/	/	/	kg ha-1 NGS-1	18.5333
15	Whalen and Reeburgh, 1992	Pristine	Pristine	Boreal	Peatland (fen)	minerotrophic	hummock	seasonally	Cyperaceae	0	0	/	USA	64.867	-147.85	/	/	/	Boreal	/	/	Peatland (fen)	minerotrophic	hummock	seasonally	Cyperaceae	Cyperaceae	Yes	1987	Annual	/	Weekly	Field, Chamber	kg ha-1 yr-1	80.5333	/	/	/	/	/	kg ha-1 GS-1	43.0667	/	/	/	/	/	kg ha-1 NGS-1	37.4667
16	Whalen and Reeburgh, 1992	Pristine	Pristine	Boreal	Peatland (fen)	minerotrophic	hummock	seasonally	Cyperaceae	0	0	/	USA	64.867	-147.85	/	/	/	Boreal	/	/	Peatland (fen)	minerotrophic	hummock	seasonally	Cyperaceae	Cyperaceae	Yes	1988	Annual	/	Weekly	Field, Chamber	kg ha-1 yr-1	113.867	/	/	/	/	/	kg ha-1 GS-1	94.2667	/	/	/	/	/	kg ha-1 NGS-1	19.6
17	Whalen and Reeburgh, 1992	Pristine	Pristine	Boreal	Peatland (fen)	minerotrophic	hummock	seasonally	Cyperaceae	0	0	/	USA	64.867	-147.85	/	/	/	Boreal	/	/	Peatland (fen)	minerotrophic	hummock	seasonally	Cyperaceae	Cyperaceae	Yes	1989	Annual	/	Weekly	Field, Chamber	kg ha-1 yr-1	81.0667	/	/	/	/	/	kg ha-1 GS-1	73.6	/	/	/	/	/	kg ha-1 NGS-1	7.46667
18	Whalen and Reeburgh, 1992	Pristine	Pristine	Boreal	Peatland (fen)	minerotrophic	hummock	seasonally	Cyperaceae	0	0	/	USA	64.867	-147.85	/	/	/	Boreal	/	/	Peatland (fen)	minerotrophic	hummock	seasonally	Cyperaceae	Cyperaceae	Yes	1990	Annual	/	Weekly	Field, Chamber	kg ha-1 yr-1	136.4	/	/	/	/	/	kg ha-1 GS-1	125.867	/	/	/	/	/	kg ha-1 NGS-1	10.5333
19	Whalen and Reeburgh, 1992	Pristine	Pristine	Boreal	Peatland (fen)	minerotrophic	hollow	seasonally	Peat moss	0	0	/	USA	64.867	-147.85	/	/	/	Boreal	/	/	Peatland (fen)	minerotrophic	hollow	seasonally	Peat moss	Peat moss	Yes	1987	Annual	/	Weekly	Field, Chamber	kg ha-1 yr-1	6.26667	/	/	/	/	/	kg ha-1 GS-1	3.6	/	/	/	/	/	kg ha-1 NGS-1	2.66667
20	Whalen and Reeburgh, 1992	Pristine	Pristine	Boreal	Peatland (fen)	minerotrophic	hollow	seasonally	Peat moss	0	0	/	USA	64.867	-147.85	/	/	/	Boreal	/	/	Peatland (fen)	minerotrophic	hollow	seasonally	Peat moss	Peat moss	Yes	1988	Annual	/	Weekly	Field, Chamber	kg ha-1 yr-1	39.0667	/	/	/	/	/	kg ha-1 GS-1	37.3333	/	/	/	/	/	kg ha-1 NGS-1	1.73333
21	Whalen and Reeburgh, 1992	Pristine	Pristine	Boreal	Peatland (fen)	minerotrophic	hollow	seasonally	Peat moss	0	0	/	USA	64.867	-147.85	/	/	/	Boreal	/	/	Peatland (fen)	minerotrophic	hollow	seasonally	Peat moss	Peat moss	Yes	1989	Annual	/	Weekly	Field, Chamber	kg ha-1 yr-1	21.2	/	/	/	/	/	kg ha-1 GS-1	18.6667	/	/	/	/	/	kg ha-1 NGS-1	2.53333
22	Whalen and Reeburgh, 1992	Pristine	Pristine	Boreal	Peatland (fen)	minerotrophic	hollow	seasonally	Peat moss	0	0	/	USA	64.867	-147.85	/	/	/	Boreal	/	/	Peatland (fen)	minerotrophic	hollow	seasonally	Peat moss	Peat moss	Yes	1990	Annual	/	Weekly	Field, Chamber	kg ha-1 yr-1	7.86667	/	/	/	/	/	kg ha-1 GS-1	7.6	/	/	/	/	/	kg ha-1 NGS-1	0.266667
23	Whalen and Reeburgh, 1992	Pristine	Pristine	Boreal	Peatland (fen)	minerotrophic	lawn	seasonally	Peat moss	0	0	/	USA	64.867	-147.85	/	/	/	Boreal	/	/	Peatland (fen)	minerotrophic	lawn	seasonally	Peat moss	Peat moss	Yes	1987	Annual	/	Weekly	Field, Chamber	kg ha-1 yr-1	4.66667	/	/	/	/	/	kg ha-1 GS-1	1.33333	/	/	/	/	/	kg ha-1 NGS-1	3.33333
24	Whalen and Reeburgh, 1992	Pristine	Pristine	Boreal	Peatland (fen)	minerotrophic	lawn	seasonally	Peat moss	0	0	/	USA	64.867	-147.85	/	/	/	Boreal	/	/	Peatland (fen)	minerotrophic	lawn	seasonally	Peat moss	Peat moss	Yes	1988	Annual	/	Weekly	Field, Chamber	kg ha-1 yr-1	43.8667	/	/	/	/	/	kg ha-1 GS-1	15.7333	/	/	/	/	/	kg ha-1 NGS-1	28.1333
25	Whalen and Reeburgh, 1992	Pristine	Pristine	Boreal	Peatland (fen)	minerotrophic	lawn	seasonally	Peat moss	0	0	/	USA	64.867	-147.85	/	/	/	Boreal	/	/	Peatland (fen)	minerotrophic	lawn	seasonally	Peat moss	Peat moss	Yes	1989	Annual	/	Weekly	Field, Chamber	kg ha-1 yr-1	47.8667	/	/	/	/	/	kg ha-1 GS-1	40.4	/	/	/	/	/	kg ha-1 NGS-1	7.46667
26	Whalen and Reeburgh, 1992	Pristine	Pristine	Boreal	Peatland (fen)	minerotrophic	lawn	seasonally	Peat moss	0	0	/	USA	64.867	-147.85	/	/	/	Boreal	/	/	Peatland (fen)	minerotrophic	lawn	seasonally	Peat moss	Peat moss	Yes	1990	Annual	/	Weekly	Field, Chamber	kg ha-1 yr-1	5.46667	/	/	/	/	/	kg ha-1 GS-1	4.93333	/	/	/	/	/	kg ha-1 NGS-1	0.533333
27	Leppälä et al. 2011	Pristine	Pristine	Boreal	Peatland (fen)	minerotrophic	overall	seasonally	Peat moss	0	0	/	Finland	64.75	-24.7	/	/	/	Boreal	/	/	Peatland (fen)	minerotrophic	overall	seasonally	Peat moss	Peat moss	No	2004	Annual	/	Bi-weekly to monthly	Field, Chamber	kg ha-1 yr-1	17.3333	/	/	/	/	/	kg ha-1 GS-1	17.3333	/	/	/	/	/	kg ha-1 NGS-1	0
28	Leppälä et al. 2011	Pristine	Pristine	Boreal	Peatland (fen)	minerotrophic	overall	seasonally	Peat moss	0	0	/	Finland	64.75	-24.7	/	/	/	Boreal	/	/	Peatland (fen)	minerotrophic	overall	seasonally	Peat moss	Peat moss	No	2004	Annual	/	Bi-weekly to monthly	Field, Chamber	kg ha-1 yr-1	140	/	/	/	/	/	kg ha-1 GS-1	118.933	/	/	/	/	/	kg ha-1 NGS-1	21.0667
29	Leppälä et al. 2011	Pristine	Pristine	Boreal	Peatland (bog)	ombrotrophic	overall	seasonally	Shrub	0	0	/	Finland	64.75	-24.7	/	/	/	Boreal	/	/	Peatland (bog)	ombrotrophic	overall	seasonally	Shrub	Shrub	No	2004	Annual	/	Bi-weekly to monthly	Field, Chamber	kg ha-1 yr-1	240	/	/	/	/	/	kg ha-1 GS-1	199.2	/	/	/	/	/	kg ha-1 NGS-1	40.8
30	Leppälä et al. 2011	Pristine	Pristine	Boreal	Peatland (fen)	minerotrophic	overall	seasonally	Cyperaceae	0	0	/	Finland	64.75	-24.7	/	/	/	Boreal	/	/	Peatland (fen)	minerotrophic	overall	seasonally	Cyperaceae	Cyperaceae	No	2004	Annual	/	Bi-weekly to monthly	Field, Chamber	kg ha-1 yr-1	252	/	/	/	/	/	kg ha-1 GS-1	156.267	/	/	/	/	/	kg ha-1 NGS-1	95.7333
31	Leppälä et al. 2011	Pristine	Pristine	Boreal	Peatland (fen)	minerotrophic	overall	seasonally	Cyperaceae	0	0	/	Finland	64.75	-24.7	/	/	/	Boreal	/	/	Peatland (fen)	minerotrophic	overall	seasonally	Cyperaceae	Cyperaceae	No	2004	Annual	/	Bi-weekly to monthly	Field, Chamber	kg ha-1 yr-1	314.667	/	/	/	/	/	kg ha-1 GS-1	232.8	/	/	/	/	/	kg ha-1 NGS-1	81.8667
32	Leppälä et al. 2011	Pristine	Pristine	Boreal	Peatland (bog)	ombrotrophic	overall	seasonally	Shrub	0	0	/	Finland	64.75	-24.7	/	/	/	Boreal	/	/	Peatland (bog)	ombrotrophic	overall	seasonally	Shrub	Shrub	No	2004	Annual	/	Bi-weekly to monthly	Field, Chamber	kg ha-1 yr-1	246.667	/	/	/	/	/	kg ha-1 GS-1	207.2	/	/	/	/	/	kg ha-1 NGS-1	39.4667
33	Li et al. 2016	Pristine	Pristine	Boreal	Peatland (fen)	ombrotrophic	overall	seasonally	Cyperaceae	0	0	5.5	Finland	61.833	24.193	160	3.3	713	Boreal	/	/	Peatland (fen)	ombrotrophic	overall	seasonally	Cyperaceae	Cyperaceae	No	2005	Annual	/	Half-hourly to daily	EC	kg ha-1 yr-1	81.7333	/	1	/	/	/	kg ha-1 GS-1	50	/	1	/	/	/	kg ha-1 NGS-1	31.7333
34	Li et al. 2016	Pristine	Pristine	Boreal	Peatland (fen)	ombrotrophic	overall	seasonally	Cyperaceae	0	0	5.5	Finland	61.833	24.193	160	3.3	713	Boreal	/	/	Peatland (fen)	ombrotrophic	overall	seasonally	Cyperaceae	Cyperaceae	No	2006	Annual	/	Half-hourly to daily	EC	kg ha-1 yr-1	73.6	/	1	/	/	/	kg ha-1 GS-1	43.3333	/	1	/	/	/	kg ha-1 NGS-1	30.2667
35	Li et al. 2016	Pristine	Pristine	Boreal	Peatland (fen)	ombrotrophic	overall	seasonally	Cyperaceae	0	0	5.5	Finland	61.833	24.193	160	3.3	713	Boreal	/	/	Peatland (fen)	ombrotrophic	overall	seasonally	Cyperaceae	Cyperaceae	No	2007	Annual	/	Half-hourly to daily	EC	kg ha-1 yr-1	138.533	/	1	/	/	/	kg ha-1 GS-1	98.4	/	1	/	/	/	kg ha-1 NGS-1	40.1333
36	Li et al. 2016	Pristine	Pristine	Boreal	Peatland (fen)	ombrotrophic	overall	seasonally	Cyperaceae	0	0	5.5	Finland	61.833	24.193	160	3.3	713	Boreal	/	/	Peatland (fen)	ombrotrophic	overall	seasonally	Cyperaceae	Cyperaceae	No	2008	Annual	/	Half-hourly to daily	EC	kg ha-1 yr-1	133.733	/	1	/	/	/	kg ha-1 GS-1	88.8	/	1	/	/	/	kg ha-1 NGS-1	44.9333
37	Li et al. 2016	Pristine	Pristine	Boreal	Peatland (fen)	ombrotrophic	overall	seasonally	Cyperaceae	0	0	5.5	Finland	61.833	24.193	160	3.3	713	Boreal	/	/	Peatland (fen)	ombrotrophic	overall	seasonally	Cyperaceae	Cyperaceae	No	2009	Annual	/	Half-hourly to daily	EC	kg ha-1 yr-1	153.733	/	1	/	/	/	kg ha-1 GS-1	89.0667	/	1	/	/	/	kg ha-1 NGS-1	64.6667
38	Li et al. 2016	Pristine	Pristine	Boreal	Peatland (fen)	ombrotrophic	overall	seasonally	Cyperaceae	0	0	5.5	Finland	61.833	24.193	160	3.3	713	Boreal	/	/	Peatland (fen)	ombrotrophic	overall	seasonally	Cyperaceae	Cyperaceae	No	2010	Annual	/	Half-hourly to daily	EC	kg ha-1 yr-1	163.067	/	1	/	/	/	kg ha-1 GS-1	95.4667	/	1	/	/	/	kg ha-1 NGS-1	67.6
39	Li et al. 2016	Pristine	Pristine	Boreal	Peatland (fen)	ombrotrophic	overall	seasonally	Cyperaceae	0	0	5.5	Finland	61.833	24.193	160	3.3	713	Boreal	/	/	Peatland (fen)	ombrotrophic	overall	seasonally	Cyperaceae	Cyperaceae	No	2011	Annual	/	Half-hourly to daily	EC	kg ha-1 yr-1	108.8	/	1	/	/	/	kg ha-1 GS-1	60.5333	/	1	/	/	/	kg ha-1 NGS-1	48.2667
40	Li et al. 2016	Pristine	Pristine	Boreal	Peatland (fen)	ombrotrophic	overall	seasonally	Cyperaceae	0	0	5.5	Finland	61.833	24.193	160	3.3	713	Boreal	/	/	Peatland (fen)	ombrotrophic	overall	seasonally	Cyperaceae	Cyperaceae	No	2012	Annual	/	Half-hourly to daily	EC	kg ha-1 yr-1	115.333	/	1	/	/	/	kg ha-1 GS-1	83.7333	/	1	/	/	/	kg ha-1 NGS-1	31.6
41	Li et al. 2016	Pristine	Pristine	Boreal	Peatland (fen)	minerotrophic	overall	seasonally	Forest	0	0	2.5	Finland	67.997	24.209	269	-1.4	484	Boreal	/	/	Peatland (fen)	minerotrophic	overall	seasonally	Forest	Forest	No	2006	Annual	/	Half-hourly to daily	EC	kg ha-1 yr-1	172.8	/	1	/	/	/	kg ha-1 GS-1	108.667	/	1	/	/	/	kg ha-1 NGS-1	64.1333
42	Li et al. 2016	Pristine	Pristine	Boreal	Peatland (fen)	minerotrophic	overall	seasonally	Forest	0	0	2.5	Finland	67.997	24.209	269	-1.4	484	Boreal	/	/	Peatland (fen)	minerotrophic	overall	seasonally	Forest	Forest	No	2007	Annual	/	Half-hourly to daily	EC	kg ha-1 yr-1	206.4	/	1	/	/	/	kg ha-1 GS-1	131.733	/	1	/	/	/	kg ha-1 NGS-1	74.6667
43	Li et al. 2016	Pristine	Pristine	Boreal	Peatland (fen)	minerotrophic	overall	seasonally	Forest	0	0	2.5	Finland	67.997	24.209	269	-1.4	484	Boreal	/	/	Peatland (fen)	minerotrophic	overall	seasonally	Forest	Forest	No	2008	Annual	/	Half-hourly to daily	EC	kg ha-1 yr-1	183.067	/	1	/	/	/	kg ha-1 GS-1	113.467	/	1	/	/	/	kg ha-1 NGS-1	69.6
44	Li et al. 2016	Pristine	Pristine	Boreal	Peatland (fen)	minerotrophic	overall	seasonally	Forest	0	0	2.5	Finland	67.997	24.209	269	-1.4	484	Boreal	/	/	Peatland (fen)	minerotrophic	overall	seasonally	Forest	Forest	No	2009	Annual	/	Half-hourly to daily	EC	kg ha-1 yr-1	237.733	/	1	/	/	/	kg ha-1 GS-1	130.933	/	1	/	/	/	kg ha-1 NGS-1	106.8
45	Li et al. 2016	Pristine	Pristine	Boreal	Peatland (fen)	minerotrophic	overall	seasonally	Forest	0	0	2.5	Finland	67.997	24.209	269	-1.4	484	Boreal	/	/	Peatland (fen)	minerotrophic	overall	seasonally	Forest	Forest	No	2010	Annual	/	Half-hourly to daily	EC	kg ha-1 yr-1	172.8	/	1	/	/	/	kg ha-1 GS-1	107.733	/	1	/	/	/	kg ha-1 NGS-1	65.0667
46	Jackowicz-Korczyński et al. 2009	Pristine	Pristine	Boreal	Peatland (fen)	ombrotrophic	overall	seasonally	Cyperaceae	0	0	/	Sweden	60.333	19.05	363	-0.9	305	Boreal	/	/	Peatland (fen)	ombrotrophic	overall	seasonally	Cyperaceae	Cyperaceae	No	2006	Annual	/	Half-hourly to daily	EC	kg ha-1 yr-1	195.467	/	1	/	/	/	kg ha-1 GS-1	103.6	/	1	/	/	/	kg ha-1 NGS-1	91.8667
47	Jackowicz-Korczyński et al. 2009	Pristine	Pristine	Boreal	Peatland (fen)	ombrotrophic	overall	seasonally	Cyperaceae	0	0	/	Sweden	60.333	19.05	363	-0.9	305	Boreal	/	/	Peatland (fen)	ombrotrophic	overall	seasonally	Cyperaceae	Cyperaceae	No	2007	Annual	/	Half-hourly to daily	EC	kg ha-1 yr-1	227.067	/	1	/	/	/	kg ha-1 GS-1	132.4	/	1	/	/	/	kg ha-1 NGS-1	94.6667
48	Jackowicz-Korczyński et al. 2009	Pristine	Pristine	Boreal	Peatland (fen)	ombrotrophic	overall	seasonally	Cyperaceae	0	0	/	Sweden	60.333	19.05	363	-0.9	305	Boreal	/	/	Peatland (fen)	ombrotrophic	overall	seasonally	Cyperaceae	Cyperaceae	No	2006	Annual	/	Half-hourly to daily	EC	kg ha-1 yr-1	245.067	/	1	/	/	/	kg ha-1 GS-1	137.733	/	1	/	/	/	kg ha-1 NGS-1	107.333
49	Jackowicz-Korczyński et al. 2009	Pristine	Pristine	Boreal	Peatland (fen)	ombrotrophic	overall	seasonally	Cyperaceae	0	0	/	Sweden	60.333	19.05	363	-0.9	305	Boreal	/	/	Peatland (fen)	ombrotrophic	overall	seasonally	Cyperaceae	Cyperaceae	No	2007	Annual	/	Half-hourly to daily	EC	kg ha-1 yr-1	295.067	/	1	/	/	/	kg ha-1 GS-1	188	/	1	/	/	/	kg ha-1 NGS-1	107.067
50	Jammet et al. 2017	Pristine	Pristine	Boreal	Peatland (fen)	/	overall	seasonally	Cyperaceae	0	0	/	Sweden	68.333	19.05	/	-0.3	/	Boreal	/	/	Peatland (fen)	/	overall	seasonally	Cyperaceae	Cyperaceae	No	2012-2013	Annual	/	Half-hourly to daily	EC	kg ha-1 yr-1	270.667	/	1	/	/	/	kg ha-1 GS-1	197.333	/	1	/	/	/	kg ha-1 NGS-1	73.3333
51	Jammet et al. 2017	Pristine	Pristine	Boreal	Peatland (fen)	/	overall	seasonally	Cyperaceae	0	0	/	Sweden	68.333	19.05	/	0.9	/	Boreal	/	/	Peatland (fen)	/	overall	seasonally	Cyperaceae	Cyperaceae	No	2012-2013	Annual	/	Half-hourly to daily	EC	kg ha-1 yr-1	294.667	/	1	/	/	/	kg ha-1 GS-1	216	/	1	/	/	/	kg ha-1 NGS-1	78.6667
52	Zona et al. 2016	Pristine	Pristine	Boreal	Peatland (fen)	/	overall	seasonally	/	0	0	/	USA	71.281	-156.612	/	/	/	Boreal	/	/	Peatland (fen)	/	overall	seasonally	/	/	Yes	2012-2013	Annual	/	Half-hourly to daily	EC	kg ha-1 yr-1	45.7333	/	1	/	/	/	kg ha-1 GS-1	26	/	1	/	/	/	kg ha-1 NGS-1	19.7333
53	Zona et al. 2016	Pristine	Pristine	Boreal	Peatland (fen)	/	overall	seasonally	/	0	0	/	USA	71.28	-156.596	/	/	/	Boreal	/	/	Peatland (fen)	/	overall	seasonally	/	/	Yes	2012-2013	Annual	/	Half-hourly to daily	EC	kg ha-1 yr-1	48.6667	/	1	/	/	/	kg ha-1 GS-1	18	/	1	/	/	/	kg ha-1 NGS-1	30.6667
54	Zona et al. 2016	Pristine	Pristine	Boreal	Peatland (fen)	/	overall	seasonally	/	0	0	/	USA	71.3225	-156.609	/	/	/	Boreal	/	/	Peatland (fen)	/	overall	seasonally	/	/	Yes	2012-2013	Annual	/	Half-hourly to daily	EC	kg ha-1 yr-1	29.2	/	1	/	/	/	kg ha-1 GS-1	10.5333	/	1	/	/	/	kg ha-1 NGS-1	18.6667
55	Zona et al. 2016	Pristine	Pristine	Boreal	Peatland (fen)	/	overall	seasonally	/	0	0	/	USA	70.47	-157.409	/	/	/	Boreal	/	/	Peatland (fen)	/	overall	seasonally	/	/	Yes	2012-2013	Annual	/	Half-hourly to daily	EC	kg ha-1 yr-1	32.8	/	1	/	/	/	kg ha-1 GS-1	17.3333	/	1	/	/	/	kg ha-1 NGS-1	15.4667
56	Zona et al. 2016	Pristine	Pristine	Boreal	Peatland (fen)	/	overall	seasonally	/	0	0	/	USA	68.486	-155.75	/	/	/	Boreal	/	/	Peatland (fen)	/	overall	seasonally	/	/	Yes	2013	Annual	/	Half-hourly to daily	EC	kg ha-1 yr-1	74.8	/	1	/	/	/	kg ha-1 GS-1	44.1333	/	1	/	/	/	kg ha-1 NGS-1	30.6667
57	Wang et al. 2009	Drainage	Grassland	Temperate	Marsh	minerotrophic	overall	seasonally	Graminoid	0	0	0.5	China	34.73	92.892	4778	-5.5	269.7	Temperate	/	/	Marsh	minerotrophic	overall	seasonally	Graminoid	Graminoid	Yes	2006	Annual	/	Weekly to biweekly	Field, Chamber	kg ha-1 yr-1	3.09918	0.977253	4	1.53228	0.416506	4	kg ha-1 GS-1	2.72689	0.985403	4	1.34352	0.421075	4	kg ha-1 NGS-1	0.372285
58	Wang et al. 2009	Drainage	Grassland	Temperate	Marsh	minerotrophic	overall	seasonally	Graminoid	0	0	0.5	China	34.73	92.892	4778	-5.5	269.7	Temperate	/	/	Marsh	minerotrophic	overall	seasonally	Graminoid	Graminoid	Yes	2006	Annual	/	Weekly to biweekly	Field, Chamber	kg ha-1 yr-1	3.09918	0.977253	4	0.581798	0.210307	4	kg ha-1 GS-1	2.72689	0.985403	4	0.495281	0.214859	4	kg ha-1 NGS-1	0.372285
59	Song et al. 2015	Pristine	Pristine	Temperate	Peatland (fen)	minerotrophic	overall	seasonally	Cyperaceae	0	0	/	China	37.583	101.333	3250	-1.6	367.5	Temperate	/	/	Marsh	minerotrophic	overall	seasonally	Cyperaceae	Cyperaceae	No	2012	Annual	/	Half-hourly to daily	EC	kg ha-1 yr-1	264.4	/	1	/	/	/	kg ha-1 GS-1	142.533	/	1	/	/	/	kg ha-1 NGS-1	121.867
60	Song et al. 2015	Pristine	Pristine	Temperate	Peatland (fen)	minerotrophic	overall	seasonally	Cyperaceae	0	0	/	China	37.583	101.333	3250	-0.7	403.4	Temperate	/	/	Marsh	minerotrophic	overall	seasonally	Cyperaceae	Cyperaceae	No	2013	Annual	/	Half-hourly to daily	EC	kg ha-1 yr-1	338.4	/	1	/	/	/	kg ha-1 GS-1	192.267	/	1	/	/	/	kg ha-1 NGS-1	146.133
61	Zhang et al. 2019	Drainage	Grassland	Temperate	Marsh	minerotrophic	overall	seasonally	Cyperaceae	0	0	/	China	34.035	102.725	3304	2.7	615	Temperate	43	/	Marsh	minerotrophic	overall	seasonally	Cyperaceae	Cyperaceae	No	2013–2014	Annual	wet	1–3 times a week	Field, Chamber	kg ha-1 yr-1	/	/	/	54.9333	/	6	kg ha-1 GS-1	/	/	/	28.9333	/	6	kg ha-1 NGS-1	/
62	Zhang et al. 2019	Drainage	Grassland	Temperate	Marsh	minerotrophic	overall	seasonally	Cyperaceae	0	0	/	China	34.035	102.725	3304	2.7	615	Temperate	43	/	Marsh	minerotrophic	overall	seasonally	Cyperaceae	Cyperaceae	No	2013–2014	Annual	wet	1–3 times a week	Field, Chamber	kg ha-1 yr-1	/	/	/	55.2	/	6	kg ha-1 GS-1	/	/	/	36.4	/	6	kg ha-1 NGS-1	/
63	Zhang et al. 2019	Drainage	Grassland	Temperate	Marsh	minerotrophic	overall	seasonally	Cyperaceae	0	0	/	China	34.035	102.725	3304	2.7	615	Temperate	43	/	Marsh	minerotrophic	overall	seasonally	Cyperaceae	Cyperaceae	No	2013–2014	Annual	wet	1–3 times a week	Field, Chamber	kg ha-1 yr-1	/	/	/	84.4	/	6	kg ha-1 GS-1	/	/	/	55.2	/	6	kg ha-1 NGS-1	/
64	Zhang et al. 2019	Drainage	Grassland	Temperate	Marsh	minerotrophic	overall	seasonally	Cyperaceae	0	0	/	China	34.035	102.725	3304	2.7	615	Temperate	43	/	Marsh	minerotrophic	overall	seasonally	Cyperaceae	Cyperaceae	No	2013–2014	Annual	wet	1–3 times a week	Field, Chamber	kg ha-1 yr-1	/	/	/	57.7333	/	6	kg ha-1 GS-1	/	/	/	37.2	/	6	kg ha-1 NGS-1	/
65	Zhang et al. 2019	Drainage	Grassland	Temperate	Marsh	minerotrophic	overall	seasonally	Cyperaceae	0	0	/	China	34.035	102.725	3304	3.2	479	Temperate	44	/	Marsh	minerotrophic	overall	seasonally	Cyperaceae	Cyperaceae	No	2014–2015	Annual	dry	1–3 times a week	Field, Chamber	kg ha-1 yr-1	/	/	/	31.8667	/	6	kg ha-1 GS-1	/	/	/	14.8	/	6	kg ha-1 NGS-1	/
66	Zhang et al. 2019	Drainage	Grassland	Temperate	Marsh	minerotrophic	overall	seasonally	Cyperaceae	0	0	/	China	34.035	102.725	3304	3.2	479	Temperate	44	/	Marsh	minerotrophic	overall	seasonally	Cyperaceae	Cyperaceae	No	2014–2015	Annual	dry	1–3 times a week	Field, Chamber	kg ha-1 yr-1	/	/	/	29.7333	/	6	kg ha-1 GS-1	/	/	/	17.4667	/	6	kg ha-1 NGS-1	/
67	Zhang et al. 2019	Drainage	Grassland	Temperate	Marsh	minerotrophic	overall	seasonally	Cyperaceae	0	0	/	China	34.035	102.725	3304	3.2	479	Temperate	44	/	Marsh	minerotrophic	overall	seasonally	Cyperaceae	Cyperaceae	No	2014–2015	Annual	dry	1–3 times a week	Field, Chamber	kg ha-1 yr-1	/	/	/	44.9333	/	6	kg ha-1 GS-1	/	/	/	22.9333	/	6	kg ha-1 NGS-1	/
68	Zhang et al. 2019	Drainage	Grassland	Temperate	Marsh	minerotrophic	overall	seasonally	Cyperaceae	0	0	/	China	34.035	102.725	3304	3.2	479	Temperate	44	/	Marsh	minerotrophic	overall	seasonally	Cyperaceae	Cyperaceae	No	2014–2015	Annual	dry	1–3 times a week	Field, Chamber	kg ha-1 yr-1	/	/	/	33.2	/	6	kg ha-1 GS-1	/	/	/	16.4	/	6	kg ha-1 NGS-1	/
69	Ma et al. 2017	Drainage	Forestry	Temperate	Marsh	minerotrophic	overall	seasonally	Cyperaceae	0	0	/	China	48.065	128.51	260-500	0.4	630	Temperate	10	/	Marsh	/	overall	seasonally	Cyperaceae	Cyperaceae		2014/05/08-2015/04/28	Annual	/	11-days	Field, Chamber	kg ha-1 yr-1	155.93	91.89	3	-0.52095	0.420619	3	kg ha-1 GS-1	150.095	91.8902	3	-0.801336	0.486771	3	kg ha-1 NGS-1	5.8352
70	Ma et al. 2017	Drainage	Forestry	Temperate	Marsh	minerotrophic	overall	seasonally	Cyperaceae	0	0	/	China	48.065	128.51	260-500	0.4	630	Temperate	30	/	Marsh	/	overall	seasonally	Cyperaceae	Cyperaceae		2014/05/08-2015/04/28	Annual	/	11-days	Field, Chamber	kg ha-1 yr-1	155.93	91.89	3	-0.5015	0.69632	3	kg ha-1 GS-1	150.095	91.8902	3	-0.240816	0.696399	3	kg ha-1 NGS-1	5.8352
71	Ma et al. 2017	Drainage	Forestry	Temperate	Marsh	minerotrophic	hummock	seasonally	Cyperaceae	0	0	/	China	48.065	128.51	260-500	0.4	630	Temperate	10	/	Marsh	/	hummock	seasonally	Cyperaceae	Cyperaceae		2014/05/08-2015/04/28	Annual	/	11-days	Field, Chamber	kg ha-1 yr-1	155.93	91.89	3	-0.613	0.526	3	kg ha-1 GS-1	150.095	91.8902	3	-0.8304	0.526095	3	kg ha-1 NGS-1	5.8352
72	Ma et al. 2017	Drainage	Forestry	Temperate	Marsh	minerotrophic	hollow	seasonally	Cyperaceae	0	0	/	China	48.065	128.51	260-500	0.4	630	Temperate	10	/	Marsh	/	hollow	seasonally	Cyperaceae	Cyperaceae		2014/05/08-2015/04/28	Annual	/	11-days	Field, Chamber	kg ha-1 yr-1	155.93	91.89	3	-0.35	0.701	3	kg ha-1 GS-1	150.095	91.8902	3	-0.74736	0.701026	3	kg ha-1 NGS-1	5.8352
73	Ma et al. 2017	Drainage	Forestry	Temperate	Marsh	minerotrophic	hummock	seasonally	Cyperaceae	0	0	/	China	48.065	128.51	260-500	0.4	630	Temperate	30	/	Marsh	/	hummock	seasonally	Cyperaceae	Cyperaceae		2014/05/08-2015/04/28	Annual	/	11-days	Field, Chamber	kg ha-1 yr-1	155.93	91.89	3	-0.964	0.263	3	kg ha-1 GS-1	150.095	91.8902	3	-0.70584	0.263002	3	kg ha-1 NGS-1	5.8352
74	Ma et al. 2017	Drainage	Forestry	Temperate	Marsh	minerotrophic	hollow	seasonally	Cyperaceae	0	0	/	China	48.065	128.51	260-500	0.4	630	Temperate	30	/	Marsh	/	hollow	seasonally	Cyperaceae	Cyperaceae		2014/05/08-2015/04/28	Annual	/	11-days	Field, Chamber	kg ha-1 yr-1	155.93	91.89	3	0.35	1.927	3	kg ha-1 GS-1	150.095	91.8902	3	0.6228	1.92723	3	kg ha-1 NGS-1	5.8352
75	Strack and Zuback, 2013	Drainage	Cropland	Boreal	Peatland (bog)	ombrotrophic	overall	seasonally	Peat moss	0	0	/	Canada	47.967	-69.429	/	5.2	886	Boreal	38	/	Peatland (bog)	ombrotrophic	overall	seasonally	Peat moss	Peat moss		2010/05-2011/03	Annual	/	5 times per month	Field, Chamber	kg ha-1 yr-1	88	60.4722	6	-2	0.447214	6	kg ha-1 GS-1	73.3333	62.2254	6	-2.66667	0.489898	6	kg ha-1 NGS-1	14.6667
76	Kandel et al. 2018	Drainage	Grassland	Temperate	Peatland (bog)	/	overall	seasonally	Cyperaceae	0	0	4	Denmark	57.23	9.84	/	9.3	925	Temperate	94	/	Peatland (bog)	/	overall	seasonally	Cyperaceae	Cyperaceae		2014/06/10-2015/06/09	Annual	/	1-2 week intervals	Field, Chamber	kg ha-1 yr-1	172	22	6	-1.5	0.6	6	kg ha-1 GS-1	168.356	22.0086	6	-1.55422	0.600429	6	kg ha-1 NGS-1	3.64393
77	Pandel et al. 2018	Drainage	Cropland	Temperate	Peatland (bog)	/	overall	seasonally	Cyperaceae	135	0	4	Denmark	57.23	9.84	/	9.3	925	Temperate	94	/	Peatland (bog)	/	overall	seasonally	Cyperaceae	Cyperaceae		2014/06/10-2015/06/09	Annual	/	1-2 week intervals	Field, Chamber	kg ha-1 yr-1	172	22	6	1.5	1.6	6	kg ha-1 GS-1	29.8775	10.5769	3	21.2484	3.45421	3	kg ha-1 NGS-1	3.64393
78	Pandel et al. 2018	Drainage	Cropland	Temperate	Peatland (bog)	/	overall	seasonally	Cyperaceae	112	25	4	Denmark	57.23	9.84	/	9.3	925	Temperate	94	/	Peatland (bog)	/	overall	seasonally	Cyperaceae	Cyperaceae		2014/06/10-2015/06/09	Annual	/	1-2 week intervals	Field, Chamber	kg ha-1 yr-1	172	22	6	-1.4	1.5	6	kg ha-1 GS-1	24.519	3.85853	3	2.714	1.82043	3	kg ha-1 NGS-1	3.64393
79	Pandel et al. 2018	Drainage	Cropland	Temperate	Peatland (bog)	/	overall	seasonally	Cyperaceae	126	0	4	Denmark	57.23	9.84	/	9.3	925	Temperate	94	/	Peatland (bog)	/	overall	seasonally	Cyperaceae	Cyperaceae		2014/06/10-2015/06/09	Annual	/	1-2 week intervals	Field, Chamber	kg ha-1 yr-1	172	22	6	-0.6	0.65	4	kg ha-1 GS-1	37.001	14.2297	3	17.569	3.32601	3	kg ha-1 NGS-1	3.64393
80	Strack et al. 2004	Drainage	Forestry	Boreal	Peatland (fen)	ombrotrophic	overall	seasonally	Peat moss	0	0	1.2	Canada	46.667	-71.167	/	/	/	Boreal	8	/	Peatland (fen)	ombrotrophic	overall	seasonally	Peat moss	Peat moss		2001/06-2002/03	Annual	/	Weekly to monthly	Field, Chamber	kg ha-1 yr-1	29.8775	10.5769	3	21.2484	3.45421	3	kg ha-1 GS-1	26.5964	10.7071	3	20.2264	3.49129	3	kg ha-1 NGS-1	3.28119
81	Strack et al. 2004	Drainage	Forestry	Boreal	Peatland (fen)	ombrotrophic	hummock	seasonally	Peat moss	0	0	1.2	Canada	46.667	-71.167	/	/	/	Boreal	8	/	Peatland (fen)	ombrotrophic	hummock	seasonally	Peat moss	Peat moss		2001/06-2002/03	Annual	/	Weekly to monthly	Field, Chamber	kg ha-1 yr-1	24.519	3.85853	3	2.714	1.82043	3	kg ha-1 GS-1	19.303	/	3	2.388	1.84939	3	kg ha-1 NGS-1	5.216
82	Strack et al. 2004	Drainage	Forestry	Boreal	Peatland (fen)	ombrotrophic	lawn	seasonally	Peat moss	0	0	1.2	Canada	46.667	-71.167	/	/	/	Boreal	8	/	Peatland (fen)	ombrotrophic	lawn	seasonally	Peat moss	Peat moss		2001/06-2002/03	Annual	/	Weekly to monthly	Field, Chamber	kg ha-1 yr-1	37.001	14.2297	3	17.569	3.32601	3	kg ha-1 GS-1	32.437	/	3	15.124	3.63516	3	kg ha-1 NGS-1	4.564
83	Strack et al. 2004	Drainage	Forestry	Boreal	Peatland (fen)	ombrotrophic	hollow	permanently	Peat moss	0	0	1.2	Canada	46.667	-71.167	/	/	/	Boreal	8	/	Peatland (fen)	ombrotrophic	hollow	permanently	Peat moss	Peat moss		2001/06-2002/03	Annual	/	Weekly to monthly	Field, Chamber	kg ha-1 yr-1	29.018	28.4589	3	44.106	9.75645	3	kg ha-1 GS-1	28.855	/	3	43.78	9.76189	/	kg ha-1 NGS-1	0.163
84	Laine et al. 1996	Drainage	Forestry	Boreal	Peatland (fen)	minerotrophic	overall	seasonally	/	0	0	/	Finland	61.8	24.317	150	3	700	Boreal	30	/	Peatland (fen)	minerotrophic	overall	seasonally	/	/		1991	Annual	/	Weekly	Field, Chamber	kg ha-1 yr-1	762.667	/	3	0.11	/	3	kg ha-1 GS-1	705.692	/	3	0.0590418	/	/	kg ha-1 NGS-1	56.9749
85	Laine et al. 1996	Drainage	Forestry	Boreal	Peatland (fen)	minerotrophic	overall	seasonally	/	0	0	/	Finland	61.8	24.317	150	3	700	Boreal	31	/	Peatland (fen)	minerotrophic	overall	seasonally	/	/		1992	Annual	/	Weekly	Field, Chamber	kg ha-1 yr-1	898.333	/	3	-0.293333	/	3	kg ha-1 GS-1	848.095	/	3	-0.597284	/	/	kg ha-1 NGS-1	50.238
86	Laine et al. 1996	Drainage	Forestry	Boreal	Peatland (fen)	minerotrophic	overall	seasonally	/	0	0	/	Finland	61.8	24.317	150	3	700	Boreal	30	/	Peatland (fen)	minerotrophic	overall	seasonally	/	/		1991	Annual	/	Weekly	Field, Chamber	kg ha-1 yr-1	277.2	/	3	2.93333	/	3	kg ha-1 GS-1	/	/	3	2.93333	/	/	kg ha-1 NGS-1	/
87	Laine et al. 1996	Drainage	Forestry	Boreal	Peatland (fen)	minerotrophic	overall	seasonally	/	0	0	/	Finland	61.8	24.317	150	3	700	Boreal	31	/	Peatland (fen)	minerotrophic	overall	seasonally	/	/		1992	Annual	/	Weekly	Field, Chamber	kg ha-1 yr-1	255.933	/	3	0.366667	/	3	kg ha-1 GS-1	/	/	3	0.366667	/	3	kg ha-1 NGS-1	/
88	Laine et al. 1996	Drainage	Forestry	Boreal	Peatland (bog)	ombrotrophic	overall	seasonally	/	0	0	/	Finland	61.8	24.317	150	3	700	Boreal	30	/	Peatland (bog)	ombrotrophic	overall	seasonally	/	/		1991	Annual	/	Weekly	Field, Chamber	kg ha-1 yr-1	66	/	3	21.6333	/	3	kg ha-1 GS-1	/	/	3	21.6333	/	3	kg ha-1 NGS-1	/
89	Laine et al. 1996	Drainage	Forestry	Boreal	Peatland (bog)	ombrotrophic	overall	seasonally	/	0	0	/	Finland	61.8	24.317	150	3	700	Boreal	31	/	Peatland (bog)	ombrotrophic	overall	seasonally	/	/		1992	Annual	/	Weekly	Field, Chamber	kg ha-1 yr-1	66.3667	/	3	23.1	/	3	kg ha-1 GS-1	/	/	3	23.1	/	3	kg ha-1 NGS-1	/
90	Laine et al. 1996	Drainage	Forestry	Boreal	Peatland (bog)	ombrotrophic	hummock	seasonally	/	0	0	/	Finland	61.8	24.317	150	3	700	Boreal	30	/	Peatland (bog)	ombrotrophic	hummock	seasonally	/	/		1991	Annual	/	Weekly	Field, Chamber	kg ha-1 yr-1	163.533	/	3	75.1667	/	3	kg ha-1 GS-1	139.159	/	3	59.7588	/	3	kg ha-1 NGS-1	24.3748
91	Laine et al. 1996	Drainage	Forestry	Boreal	Peatland (bog)	ombrotrophic	hummock	seasonally	/	0	0	/	Finland	61.8	24.317	150	3	700	Boreal	31	/	Peatland (bog)	ombrotrophic	hummock	seasonally	/	/		1992	Annual	/	Weekly	Field, Chamber	kg ha-1 yr-1	139.7	/	3	77.3667	/	3	kg ha-1 GS-1	121.11	/	3	67.526	/	3	kg ha-1 NGS-1	18.5899
92	Beetz et al. 2013	Drainage	Grassland	Temperate	Peatland (bog)	ombrotrophic	overall	seasonally	Cyperaceae	118	2.3	5.15	Germany	53.683	8.817	/	10.2	916	Temperate	57	/	Peatland (bog)	ombrotrophic	overall	seasonally	Cyperaceae	Cyperaceae		2007/07/01-2008/06/30	Annual	dry	biweekly	Field, Chamber	kg ha-1 yr-1	75.6533	22.5859	3	1.94667	8.17528	3	kg ha-1 GS-1	106	76.5566	3	4	4.15692	3	kg ha-1 NGS-1	11.6346
93	Beetz et al. 2013	Drainage	Grassland	Temperate	Peatland (bog)	ombrotrophic	overall	seasonally	Cyperaceae	121	2.1	5.15	Germany	53.683	8.817	/	10.8	929	Temperate	57	/	Peatland (bog)	ombrotrophic	overall	seasonally	Cyperaceae	Cyperaceae		2008/07/01-2009/06/30	Annual	wet	biweekly	Field, Chamber	kg ha-1 yr-1	36.8133	5.88897	3	0.973333	1.17779	3	kg ha-1 GS-1	122	57.8505	3	5	6.9282	3	kg ha-1 NGS-1	2.65261
94	Nykanen et al. 1995	Drainage	Grassland	Boreal	Peatland (fen)	minerotrophic	overall	seasonally	Cyperaceae	80	0	6.5	Finland	62.667	30.833	/	1.9	791.028	Boreal	60	/	Peatland (fen)	minerotrophic	overall	seasonally	Cyperaceae	Cyperaceae		1991	Annual	wet	biweekly	Field, Chamber	kg ha-1 yr-1	198.667	/	3	2.8	/	3	kg ha-1 GS-1	106	76.5566	3	5	3.2909	3	kg ha-1 NGS-1	65.3618
95	Nykanen et al. 1995	Drainage	Grassland	Boreal	Peatland (fen)	minerotrophic	overall	seasonally	Cyperaceae	80	0	6.5	Finland	62.667	30.833	/	1.9	753.675	Boreal	61	/	Peatland (fen)	minerotrophic	overall	seasonally	Cyperaceae	Cyperaceae		1992	Annual	wet	biweekly	Field, Chamber	kg ha-1 yr-1	345.333	/	3	1.33333	/	3	kg ha-1 GS-1	122	57.8505	3	16	12.2976	3	kg ha-1 NGS-1	137.086
96	Danevcic et al. 2010	Drainage	Forestry	Boreal	Peatland (bog)	ombrotrophic	overall	seasonally	Forest	0	0	/	Slovenia	45.983	14.5	/	10	1400	Boreal	/	/	Peatland (bog)	ombrotrophic	overall	seasonally	Forest	Forest		2005/6-2006/8	Annual	wet	weekly	Field, Chamber	kg ha-1 yr-1	3.1	0.1	3	-2.81	0.1	3	kg ha-1 GS-1	2.75159	1.00441	3	-1.22828	1.37181	3	kg ha-1 NGS-1	0.348405
97	Von Arnold et al. 2005a	Drainage	Forestry	Boreal	Peatland (bog)	ombrotrophic	overall	seasonally	Cyperaceae	0	0	0.9	Sweden	57.133	14.75	/	5.6	766.96	Boreal	30	/	Peatland (bog)	ombrotrophic	overall	seasonally	Cyperaceae	Cyperaceae	No	2000/9-2001/9	Annual	wet	weekly	Field, Chamber	kg ha-1 yr-1	106	76.5566	3	1	2.07846	3	kg ha-1 GS-1	67.6613	77.3534	3	0.628881	2.08094	3	kg ha-1 NGS-1	38.3387
98	Von Arnold et al. 2005a	Drainage	Forestry	Boreal	Peatland (bog)	ombrotrophic	overall	seasonally	Cyperaceae	0	0	0.9	Sweden	57.133	14.75	/	5.6	789.598	Boreal	31	/	Peatland (bog)	ombrotrophic	overall	seasonally	Cyperaceae	Cyperaceae	No	2001/9-2002/9	Annual	wet	weekly	Field, Chamber	kg ha-1 yr-1	122	57.8505	3	0.01	2.42487	3	kg ha-1 GS-1	71.4762	58.3345	3	0.500664	2.43026	3	kg ha-1 NGS-1	50.5238
99	Von Arnold et al. 2005a	Drainage	Forestry	Boreal	Peatland (bog)	ombrotrophic	overall	seasonally	Cyperaceae	0	0	0.9	Sweden	57.133	14.75	/	5.6	766.96	Boreal	40	/	Peatland (bog)	ombrotrophic	overall	seasonally	Cyperaceae	Cyperaceae	No	2000/9-2001/9	Annual	wet	weekly	Field, Chamber	kg ha-1 yr-1	106	76.5566	3	4	4.15692	3	kg ha-1 GS-1	67.6613	77.3534	3	3.64424	4.16165	3	kg ha-1 NGS-1	38.3387
100	Von Arnold et al. 2005a	Drainage	Forestry	Boreal	Peatland (bog)	ombrotrophic	overall	seasonally	Cyperaceae	0	0	0.9	Sweden	57.133	14.75	/	5.6	789.598	Boreal	41	/	Peatland (bog)	ombrotrophic	overall	seasonally	Cyperaceae	Cyperaceae	No	2001/9-2002/9	Annual	wet	weekly	Field, Chamber	kg ha-1 yr-1	122	57.8505	3	5	6.9282	3	kg ha-1 GS-1	71.4762	58.3345	4	2.66674	6.97585	4	kg ha-1 NGS-1	50.5238
101	Von Arnold et al. 2005a	Drainage	Forestry	Boreal	Peatland (bog)	ombrotrophic	overall	seasonally	Cyperaceae	0	0	0.9	Sweden	57.133	14.75	/	5.6	766.96	Boreal	40	/	Peatland (bog)	ombrotrophic	overall	seasonally	Cyperaceae	Cyperaceae	No	2000/9-2001/9	Annual	wet	weekly	Field, Chamber	kg ha-1 yr-1	106	76.5566	3	5	3.2909	3	kg ha-1 GS-1	67.6613	77.3534	4	2.44936	3.33321	4	kg ha-1 NGS-1	38.3387
102	Von Arnold et al. 2005a	Drainage	Forestry	Boreal	Peatland (bog)	ombrotrophic	overall	seasonally	Cyperaceae	0	0	0.9	Sweden	57.133	14.75	/	5.6	789.598	Boreal	41	/	Peatland (bog)	ombrotrophic	overall	seasonally	Cyperaceae	Cyperaceae	No	2001/9-2002/9	Annual	wet	weekly	Field, Chamber	kg ha-1 yr-1	122	57.8505	3	16	12.2976	3	kg ha-1 GS-1	71.4762	58.3345	4	9.18394	12.3167	4	kg ha-1 NGS-1	50.5238
103	Von Arnold et al. 2005b	Drainage	Forestry	Boreal	Peatland (bog)	ombrotrophic	overall	seasonally	Cyperaceae	0	0	0.9	Sweden	57.133	14.75	/	5.6	766.96	Boreal	60	/	Peatland (bog)	ombrotrophic	overall	seasonally	Cyperaceae	Cyperaceae	No	2000/9-2001/9	Annual	wet	weekly	Field, Chamber	kg ha-1 yr-1	51	61.032	3	5	6.00833	10	kg ha-1 GS-1	34.6431	61.1119	4	4.41587	6.00967	4	kg ha-1 NGS-1	16.3569
104	Von Arnold et al. 2005b	Drainage	Forestry	Boreal	Peatland (bog)	ombrotrophic	overall	seasonally	Cyperaceae	0	0	0.9	Sweden	57.133	14.75	/	5.6	789.598	Boreal	61	/	Peatland (bog)	ombrotrophic	overall	seasonally	Cyperaceae	Cyperaceae	No	2001/9-2002/9	Annual	wet	weekly	Field, Chamber	kg ha-1 yr-1	101	133.448	3	13	25.9307	10	kg ha-1 GS-1	72.9903	133.628	4	12.3853	25.9316	4	kg ha-1 NGS-1	28.0097
105	Von Arnold et al. 2005b	Drainage	Forestry	Boreal	Peatland (bog)	ombrotrophic	overall	seasonally	Cyperaceae	0	0	0.9	Sweden	57.133	14.75	/	5.6	766.96	Boreal	20	/	Peatland (bog)	ombrotrophic	overall	seasonally	Cyperaceae	Cyperaceae	No	2000/9-2001/9	Annual	wet	weekly	Field, Chamber	kg ha-1 yr-1	51	61.032	3	1	5.6921	10	kg ha-1 GS-1	34.6431	61.1119	4	-0.922441	5.74452	4	kg ha-1 NGS-1	16.3569
106	Von Arnold et al. 2005b	Drainage	Forestry	Boreal	Peatland (bog)	ombrotrophic	overall	seasonally	Cyperaceae	0	0	0.9	Sweden	57.133	14.75	/	5.6	789.598	Boreal	21	/	Peatland (bog)	ombrotrophic	overall	seasonally	Cyperaceae	Cyperaceae	No	2001/9-2002/9	Annual	wet	weekly	Field, Chamber	kg ha-1 yr-1	101	133.448	3	17	24.982	10	kg ha-1 GS-1	72.9903	/	3	14.9769	25.0035	3	kg ha-1 NGS-1	28.0097
107	Ma et al. 2018	Drainage	Grassland	Temperate	Marsh	minerotrophic	overall	seasonally	Cyperaceae	0	0	/	China	34.267	102.433	3430	2.9	592.6	Temperate	/	/	Marsh	minerotrophic	overall	seasonally	Cyperaceae	Cyperaceae		2013/5-2014/5	Annual	/	weekly	Field, Chamber	kg ha-1 yr-1	34.8843	2.76049	4	15.5944	2.10278	4	kg ha-1 GS-1	30.2436	/	3	11.8727	2.11143	/	kg ha-1 NGS-1	4.6407
108	Ma et al. 2018	Drainage	Grassland	Temperate	Marsh	minerotrophic	overall	seasonally	Cyperaceae	0	0	/	China	34.267	102.433	3430	2.9	592.6	Temperate	/	/	Marsh	minerotrophic	overall	seasonally	Cyperaceae	Cyperaceae		2013/5-2014/5	Annual	/	weekly	Field, Chamber	kg ha-1 yr-1	34.8843	2.76049	4	-3.7234	0.337	4	kg ha-1 GS-1	30.2436	2.78477	6	-1.3244	0.424117	6	kg ha-1 NGS-1	4.6407
109	Ma et al. 2018	Drainage	Grassland	Temperate	Marsh	minerotrophic	overall	seasonally	Cyperaceae	0	0	/	China	34.267	102.433	3430	2.9	592.6	Temperate	/	/	Marsh	minerotrophic	overall	seasonally	Cyperaceae	Cyperaceae		2013/5-2014/5	Annual	/	weekly	Field, Chamber	kg ha-1 yr-1	34.8843	2.76049	4	-6.8844	0.447298	4	kg ha-1 GS-1	30.2436	2.78477	6	-2.2047	0.587503	6	kg ha-1 NGS-1	4.6407
110	Ma et al. 2018	Drainage	Grassland	Temperate	Marsh	minerotrophic	overall	seasonally	Cyperaceae	0	0	/	China	34.267	102.433	3430	2.9	592.6	Temperate	/	/	Marsh	minerotrophic	overall	seasonally	Cyperaceae	Cyperaceae		2014/5-2015/5	Annual	/	weekly	Field, Chamber	kg ha-1 yr-1	12.3249	4.04823	4	4.5682	1.43858	4	kg ha-1 GS-1	9.4652	5.10073	3	2.8576	1.44651	3	kg ha-1 NGS-1	2.8597
111	Ma et al. 2018	Drainage	Grassland	Temperate	Marsh	minerotrophic	overall	seasonally	Cyperaceae	0	0	/	China	34.267	102.433	3430	2.9	592.6	Temperate	/	/	Marsh	minerotrophic	overall	seasonally	Cyperaceae	Cyperaceae		2014/5-2015/5	Annual	/	weekly	Field, Chamber	kg ha-1 yr-1	12.3249	4.04823	4	-2.4133	0.283437	4	kg ha-1 GS-1	9.4652	5.10073	3	0.4275	0.289636	3	kg ha-1 NGS-1	2.8597
112	Ma et al. 2018	Drainage	Grassland	Temperate	Marsh	minerotrophic	overall	seasonally	Cyperaceae	0	0	/	China	34.267	102.433	3430	2.9	592.6	Temperate	/	/	Marsh	minerotrophic	overall	seasonally	Cyperaceae	Cyperaceae		2014/5-2015/5	Annual	/	weekly	Field, Chamber	kg ha-1 yr-1	12.3249	4.04823	4	0.2877	0.263124	4	kg ha-1 GS-1	9.4652	/	4	2.4777	0.332636	4	kg ha-1 NGS-1	2.8597
113	Yamulki et al. 2013	Drainage	Cropland	Temperate	Peatland (bog)	ombrotrophic	overall	seasonally	Peat moss	0	0	4.6	UK	56.146	-4.3	15	9.4	1672	Temperate	88	/	Peatland (bog)	ombrotrophic	overall	seasonally	Peat moss	Peat moss		2008/02-2009/02	Annual	wet	biweekly	Field, Chamber	kg ha-1 yr-1	5.4	/	3	1.4	/	3	kg ha-1 GS-1	5.37444	/	4	1.37828	/	4	kg ha-1 NGS-1	0.0255578
114	Yamulki et al. 2013	Drainage	Cropland	Temperate	Peatland (bog)	ombrotrophic	overall	seasonally	Peat moss	0	0	5.6	UK	56.146	-4.3	15	9.4	1311	Temperate	89	/	Peatland (bog)	ombrotrophic	overall	seasonally	Peat moss	Peat moss		2009/02-2009/12	Annual	dry	monthly	Field, Chamber	kg ha-1 yr-1	7.5	/	3	1.6	/	3	kg ha-1 GS-1	7.32259	/	4	1.37624	/	4	kg ha-1 NGS-1	0.177414
115	Cao et al. 2018	Low drainage	Grassland	Temperate	Marsh	minerotrophic	overall	seasonally	Cyperaceae	0	0	0.3-10.0	China	32.8	102.55	3500	1.7	756	Temperate	4-month	/	Marsh	minerotrophic	overall	seasonally	Cyperaceae	Cyperaceae		2013/08-2016/12	Annual	/	monthly	Field, Chamber	kg ha-1 yr-1	42.7397	33.5547	6	15.6164	21.475	6	kg ha-1 GS-1	17.8082	/	4	6.30137	26.0605	4	kg ha-1 NGS-1	24.9315
116	Cao et al. 2018	High drainage	Grassland	Temperate	Marsh	minerotrophic	overall	seasonally	Cyperaceae	0	0	0.3-10.0	China	32.8	102.55	3500	1.7	756	Temperate	4-month	/	Marsh	minerotrophic	overall	seasonally	Cyperaceae	Cyperaceae		2013/08-2016/12	Annual	/	monthly	Field, Chamber	kg ha-1 yr-1	42.7397	33.5547	6	16.1644	14.764	6	kg ha-1 GS-1	17.8082	/	4	5.75342	20.8795	4	kg ha-1 NGS-1	24.9315
117	Mojeremane et al. 2012	Drainage	Forestry	Temperate	Swamp	minerotrophic	overall	seasonally	Graminoid	0	0	0.15-0.40	UK	55.167	-2.05	300	7.6	950	Temperate	2-month	/	Swamp	minerotrophic	overall	seasonally	Graminoid	Graminoid		2006/06-2007/06	Annual	/	monthly	Field, Chamber	kg ha-1 yr-1	21.18	2.25167	3	9.06	0.952628	3	kg ha-1 GS-1	10.4145	/	4	4.6824	1.39499	4	kg ha-1 NGS-1	10.7655
118	Mojeremane et al. 2012	Drainage	Forestry	Temperate	Swamp	minerotrophic	overall	seasonally	Graminoid	0	0	0.15-0.40	UK	55.167	-2.05	300	7.6	950	Temperate	2-month	/	Swamp	minerotrophic	overall	seasonally	Graminoid	Graminoid		2007/06-2008/06	Annual	/	monthly	Field, Chamber	kg ha-1 yr-1	13.53	1.59349	3	3.23	0.744782	3	kg ha-1 GS-1	5.07899	/	/	1.28587	0.930632	6	kg ha-1 NGS-1	8.45101
119	Mojeremane et al. 2012	Drainage	Forestry	Temperate	Swamp	minerotrophic	overall	seasonally	Graminoid	0	0	0.15-0.40	UK	55.167	-2.05	300	7.6	950	Temperate	2-month	/	Swamp	minerotrophic	overall	seasonally	Graminoid	Graminoid		1994/11-1995/11	Annual	/	monthly	Field, Chamber	kg ha-1 yr-1	68	/	4	16	/	4	kg ha-1 GS-1	45.3333	/	/	13.3333	/	6	kg ha-1 NGS-1	22.6667
120	Mojeremane et al. 2012	Drainage	Forestry	Temperate	Swamp	minerotrophic	overall	seasonally	Graminoid	0	0	0.15-0.40	UK	55.167	-2.05	300	7.6	950	Temperate	2-month	/	Swamp	minerotrophic	overall	seasonally	Graminoid	Graminoid		1994/11-1995/11	Annual	/	monthly	Field, Chamber	kg ha-1 yr-1	68	/	4	40	/	4	kg ha-1 GS-1	64	/	3	36	/	/	kg ha-1 NGS-1	4
121	Mojeremane et al. 2012	Drainage	Forestry	Temperate	Swamp	minerotrophic	overall	seasonally	Graminoid	0	0	0.15-0.40	UK	55.167	-2.05	300	7.6	950	Temperate	2-month	/	Swamp	minerotrophic	overall	seasonally	Graminoid	Graminoid		1994/11-1995/11	Annual	/	monthly	Field, Chamber	kg ha-1 yr-1	441.333	/	4	0.0133333	/	4	kg ha-1 GS-1	413.333	/	3	-0.12	/	/	kg ha-1 NGS-1	28
122	Alm et al. 1999	Drainage	Forestry	Boreal	Peatland (bog)	ombrotrophic	overall	seasonally	Peat moss	0	0	2	Finland	62.817	30.983	148	2	600	Boreal	20	/	Peatland (bog)	ombrotrophic	overall	seasonally	Peat moss	Peat moss		1994/11-1995/10	Annual	/	monthly	Field, Chamber	kg ha-1 yr-1	68	/	4	16	/	4	kg ha-1 GS-1	45.3333	/	3	13.3333	/	/	kg ha-1 NGS-1	22.6667
123	Alm et al. 1999	Drainage	Forestry	Boreal	Peatland (bog)	ombrotrophic	hummock	seasonally	Peat moss	0	0	2.3	Finland	61.8	24.317	150	2	600	Boreal	30	/	Peatland (bog)	ombrotrophic	hummock	seasonally	Peat moss	Peat moss		1994/11-1995/10	Annual	/	monthly	Field, Chamber	kg ha-1 yr-1	68	/	4	40	/	4	kg ha-1 GS-1	64	/	3	36	/	/	kg ha-1 NGS-1	4
124	Alm et al. 1999	Drainage	Forestry	Boreal	Peatland (fen)	minerotrophic	overall	seasonally	Cyperaceae	0	0	1.6	Finland	61.8	24.317	150	2	600	Boreal	20	/	Peatland (fen)	minerotrophic	overall	seasonally	Cyperaceae	Cyperaceae		1994/11-1995/10	Annual	/	monthly	Field, Chamber	kg ha-1 yr-1	441.333	/	4	0.266667	/	4	kg ha-1 GS-1	413.333	/	3	0.133333	/	/	kg ha-1 NGS-1	28
125	Maljanen et al. 2010	Drainage	Grassland	Boreal	Peatland (fen)	minerotrophic	overall	seasonally	/	0	0	1.5	Finland	63.9	23.933	/	3.5	928	Boreal	77	/	Peatland (fen)	minerotrophic	overall	seasonally	/	/	No	2007/09-2008/10	Annual	/	monthly	Field, Chamber	kg ha-1 yr-1	/	/	/	0.48	2.38417	6	kg ha-1 GS-1	/	/	3	0.876864	2.39717	/	kg ha-1 NGS-1	/
126	Maljanen et al. 2010	Drainage	Forestry	Boreal	Peatland (fen)	minerotrophic	overall	seasonally	/	0	0	1.5	Finland	63.9	23.933	/	3.5	928	Boreal	47	/	Peatland (fen)	minerotrophic	overall	seasonally	/	/	No	2007/09-2008/10	Annual	/	monthly	Field, Chamber	kg ha-1 yr-1	/	/	/	-2.57333	1.63299	6	kg ha-1 GS-1	/	/	3	-1.97295	1.68929	/	kg ha-1 NGS-1	/
127	Hao et al. 2006	Pristine	Pristine	Temperate	Marsh	minerotrophic	overall	permanently	Cyperaceae	0	0	/	China	47.583	133.517	/	/	/	Temperate	/	/	Marsh	minerotrophic	overall	permanently	Cyperaceae	Cyperaceae	No	2002	Annual	/	biweekly	Field, Chamber	kg ha-1 yr-1	1385.06	/	3	/	/	/	kg ha-1 GS-1	1348	/	3	/	/	/	kg ha-1 NGS-1	37.0539
128	Hao et al. 2006	Pristine	Pristine	Temperate	Marsh	minerotrophic	overall	permanently	Cyperaceae	0	0	/	China	47.583	133.517	/	/	/	Temperate	/	/	Marsh	minerotrophic	overall	permanently	Cyperaceae	Cyperaceae	No	2003	Annual	/	biweekly	Field, Chamber	kg ha-1 yr-1	500	/	3	/	/	/	kg ha-1 GS-1	481.187	/	3	/	/	/	kg ha-1 NGS-1	18.8134
129	Hao et al. 2006	Pristine	Pristine	Temperate	Marsh	minerotrophic	overall	seasonally	Shrub	0	0	/	China	47.583	133.517	/	/	/	Temperate	/	/	Marsh	minerotrophic	overall	seasonally	Shrub	Shrub	No	2002	Annual	/	biweekly	Field, Chamber	kg ha-1 yr-1	202.02	/	3	/	/	/	kg ha-1 GS-1	184.973	/	3	/	/	/	kg ha-1 NGS-1	17.0467
130	Hao et al. 2006	Pristine	Pristine	Temperate	Marsh	minerotrophic	overall	seasonally	Shrub	0	0	/	China	47.583	133.517	/	/	/	Temperate	/	/	Marsh	minerotrophic	overall	seasonally	Shrub	Shrub	No	2003	Annual	/	biweekly	Field, Chamber	kg ha-1 yr-1	121.212	/	3	/	/	/	kg ha-1 GS-1	107.979	/	/	/	/	3	kg ha-1 NGS-1	13.233
131	Song et al. 2009	Pristine	Pristine	Temperate	Marsh	minerotrophic	overall	permanently	Cyperaceae	0	0	/	China	47.583	133.517	/	2.3	476.1	Temperate	/	/	Marsh	minerotrophic	overall	permanently	Cyperaceae	cyperaceae	No	2002/06-2003/06	Annual	/	biweekly	Field, Chamber	kg ha-1 yr-1	345.24	/	3	/	/	/	kg ha-1 GS-1	312.787	/	/	/	/	3	kg ha-1 NGS-1	32.4533
132	Song et al. 2009	Pristine	Pristine	Temperate	Marsh	minerotrophic	overall	permanently	Cyperaceae	0	0	/	China	47.583	133.517	/	2.23	484.2	Temperate	/	/	Marsh	minerotrophic	overall	permanently	Cyperaceae	cyperaceae	No	2006/06-2004/06	Annual	/	biweekly	Field, Chamber	kg ha-1 yr-1	656.947	/	3	/	/	/	kg ha-1 GS-1	634.293	/	/	/	/	3	kg ha-1 NGS-1	22.6533
133	Song et al. 2009	Pristine	Pristine	Temperate	Marsh	minerotrophic	overall	permanently	Cyperaceae	0	0	/	China	47.583	133.517	/	2.17	444.7	Temperate	/	/	Marsh	minerotrophic	overall	permanently	Cyperaceae	cyperaceae	No	2004/06-2005/06	Annual	/	biweekly	Field, Chamber	kg ha-1 yr-1	573.787	/	3	/	/	/	kg ha-1 GS-1	576.013	/	/	/	/	3	kg ha-1 NGS-1	-2.22667
134	Song et al. 2009	Pristine	Pristine	Temperate	Marsh	minerotrophic	overall	seasonally	Shrub	0	0	/	China	47.583	133.517	/	2.3	476.1	Temperate	/	/	Marsh	minerotrophic	overall	seasonally	Shrub	Shrub	No	2002/06-2003/06	Annual	/	biweekly	Field, Chamber	kg ha-1 yr-1	86	/	3	/	/	/	kg ha-1 GS-1	80.7733	/	/	/	/	2	kg ha-1 NGS-1	5.22667
135	Song et al. 2009	Pristine	Pristine	Temperate	Marsh	minerotrophic	overall	seasonally	Shrub	0	0	/	China	47.583	133.517	/	2.23	484.2	Temperate	/	/	Marsh	minerotrophic	overall	seasonally	Shrub	Shrub	No	2006/06-2004/06	Annual	/	biweekly	Field, Chamber	kg ha-1 yr-1	77.6267	/	3	/	/	/	kg ha-1 GS-1	75.2933	/	6	/	/	/	kg ha-1 NGS-1	2.33333
136	Song et al. 2009	Pristine	Pristine	Temperate	Marsh	minerotrophic	overall	seasonally	Shrub	0	0	/	China	47.583	133.517	/	2.17	444.7	Temperate	/	/	Marsh	minerotrophic	overall	seasonally	Shrub	Shrub	No	2004/06-2005/06	Annual	/	biweekly	Field, Chamber	kg ha-1 yr-1	10.7733	/	3	/	/	/	kg ha-1 GS-1	12.04	/	6	/	/	/	kg ha-1 NGS-1	-1.26667
137	Song et al. 2009	Drainage	Forestry	Temperate	Swamp	minerotrophic	overall	seasonally	Shrub	0	0	/	China	47.583	133.517	/	2.3	476.1	Temperate	/	/	Swamp	minerotrophic	overall	seasonally	Shrub	Shrub	No	2002/06-2003/06	Annual	/	biweekly	Field, Chamber	kg ha-1 yr-1	/	/	/	3.54667	/	3	kg ha-1 GS-1	/	/	6	2.76	/	/	kg ha-1 NGS-1	/
138	Song et al. 2009	Drainage	Forestry	Temperate	Swamp	minerotrophic	overall	seasonally	Shrub	0	0	/	China	47.583	133.517	/	2.23	484.2	Temperate	/	/	Swamp	minerotrophic	overall	seasonally	Shrub	Shrub	No	2006/06-2004/06	Annual	/	biweekly	Field, Chamber	kg ha-1 yr-1	/	/	/	4.52	/	3	kg ha-1 GS-1	/	/	6	1.90667	/	/	kg ha-1 NGS-1	/
139	Song et al. 2009	Drainage	Forestry	Temperate	Swamp	minerotrophic	overall	seasonally	Shrub	0	0	/	China	47.583	133.517	/	2.17	444.7	Temperate	/	/	Swamp	minerotrophic	overall	seasonally	Shrub	Shrub	No	2004/06-2005/06	Annual	/	biweekly	Field, Chamber	kg ha-1 yr-1	/	/	/	0.266667	/	3	kg ha-1 GS-1	/	/	1	0.76	/	1	kg ha-1 NGS-1	/
140	Jiang et al. 2009	Drainage	Cropland	Temperate	Marsh	minerotrophic	overall	seasonally	Shrub	40	0	/	China	47.583	133.517	56	2.3	431.6	Temperate	60	/	Marsh	minerotrophic	overall	seasonally	Shrub	Shrub	No	2006	Annual	/	weekly	Field, Chamber	kg ha-1 yr-1	199.12	39.04	3	-1.37	0.68	3	kg ha-1 GS-1	81.908	/	1	45.7318	/	1	kg ha-1 NGS-1	6.45149
141	Jiang et al. 2009	Drainage	Cropland	Temperate	Marsh	minerotrophic	overall	seasonally	Shrub	72	0	/	China	47.583	133.517	56	2.3	431.6	Temperate	60	/	Marsh	minerotrophic	overall	seasonally	Shrub	Shrub	No	2006	Annual	/	weekly	Field, Chamber	kg ha-1 yr-1	199.12	39.04	3	94.82	9.86	3	kg ha-1 GS-1	103.007	/	1	52.8453	/	1	kg ha-1 NGS-1	6.45149
142	Lohila et al. 2011	Drainage	Forestry	Boreal	Peatland (bog)	ombrotrophic	overall	seasonally	/	0	0	2.2	Finland	60.647	24.356	/	4.4	627	Boreal	35	/	Peatland (bog)	ombrotrophic	overall	seasonally	/	/	No	2004/07-2005/07	Annual	/	biweekly	Field, Chamber	kg ha-1 yr-1	/	/	/	-1.2	/	3	kg ha-1 GS-1	/	/	12	-0.58	/	/	kg ha-1 NGS-1	/
143	Järveoja et al. 2016	Drainage	Peat extraction	Temperate	Peatland (bog)	ombrotrophic	overall	seasonally	/	0	0	2.5	Estonia	58.538	25.862	/	7.2	784	Temperate	34	/	Peatland (bog)	ombrotrophic	overall	seasonally	/	/	No	2014/03-2015/03	Annual	/	biweekly	Field, Chamber	kg ha-1 yr-1	/	/	/	1.82353	/	2	kg ha-1 GS-1	/	/	4	1.02941	/	/	kg ha-1 NGS-1	/
144	Dinsmore et al. 2009	Pristine	Pristine	Temperate	Peatland (bog)	ombrotrophic	hummock	seasonally	Peat moss	0	0	/	UK	55.793	-3.243	/	/	1016	Temperate	/	/	Peatland (bog)	ombrotrophic	hummock	seasonally	Peat moss	Peat moss	No	2005/05-2006/05	Annual	/	biweekly	Field, Chamber	kg ha-1 yr-1	-0.174649	0.124484	6	/	/	/	kg ha-1 GS-1	-0.257692	0.154379	4	/	/	/	kg ha-1 NGS-1	0.0830435
145	Dinsmore et al. 2009	Pristine	Pristine	Temperate	Peatland (bog)	ombrotrophic	hummock	seasonally	Peat moss	0	0	/	UK	55.793	-3.243	/	/	1016	Temperate	/	/	Peatland (bog)	ombrotrophic	hummock	seasonally	Peat moss	Peat moss	No	2005/11-2006/11	Annual	/	biweekly	Field, Chamber	kg ha-1 yr-1	2.66557	3.67104	6	/	/	/	kg ha-1 GS-1	2.58252	3.67217	4	/	/	/	kg ha-1 NGS-1	0.0830435
146	Dinsmore et al. 2009	Pristine	Pristine	Temperate	Peatland (bog)	ombrotrophic	hollow	seasonally	Peat moss	0	0	/	UK	55.793	-3.243	/	/	1016	Temperate	/	/	Peatland (bog)	ombrotrophic	hollow	seasonally	Peat moss	Peat moss	No	2005/05-2006/05	Annual	/	biweekly	Field, Chamber	kg ha-1 yr-1	0.273712	1.08071	6	/	/	/	kg ha-1 GS-1	-0.238462	1.52601	4	/	/	/	kg ha-1 NGS-1	0.512174
147	Dinsmore et al. 2009	Pristine	Pristine	Temperate	Peatland (bog)	ombrotrophic	hollow	seasonally	Peat moss	0	0	/	UK	55.793	-3.243	/	/	1016	Temperate	/	/	Peatland (bog)	ombrotrophic	hollow	seasonally	Peat moss	Peat moss	No	2005/11-2006/11	Annual	/	biweekly	Field, Chamber	kg ha-1 yr-1	5.5413	7.95677	6	/	/	/	kg ha-1 GS-1	5.02913	/	5	/	/	/	kg ha-1 NGS-1	0.512174
148	Kittler et al. 2017	Drainage	Climate drying	Boreal	Peatland (fen)	minerotrophic	overall	seasonally	Cyperaceae	0	0	0.2	Russia	68.75	161.33	/	-10.2	160	Boreal	13	/	Peatland (fen)	minerotrophic	overall	seasonally	Cyperaceae	Cyperaceae	Yes	2014	Annual	/	Half-hourly to daily	EC	kg ha-1 yr-1	94.5761	/	1	48.1049	/	1	kg ha-1 GS-1	75.62	/	5	33.9041	/	/	kg ha-1 NGS-1	18.9561
149	Kittler et al. 2017	Drainage	Climate drying	Boreal	Peatland (fen)	minerotrophic	overall	seasonally	Cyperaceae	0	0	0.2	Russia	68.75	161.33	/	-10.2	160	Boreal	14	/	Peatland (fen)	minerotrophic	overall	seasonally	Cyperaceae	Cyperaceae	Yes	2015	Annual	/	Half-hourly to daily	EC	kg ha-1 yr-1	81.908	/	1	45.7318	/	1	kg ha-1 GS-1	59.5218	/	6	28.8948	/	/	kg ha-1 NGS-1	22.3862
150	Kittler et al. 2017	Drainage	Climate drying	Boreal	Peatland (fen)	minerotrophic	overall	seasonally	Cyperaceae	0	0	0.2	Russia	68.75	161.33	/	-10.2	160	Boreal	15	/	Peatland (fen)	minerotrophic	overall	seasonally	Cyperaceae	Cyperaceae	Yes	2016	Annual	/	Half-hourly to daily	EC	kg ha-1 yr-1	103.007	/	1	52.8453	/	1	kg ha-1 GS-1	73.7706	/	6	32.0545	/	/	kg ha-1 NGS-1	29.2365
151	Berger et al. 2019	Pristine	Pristine	Temperate	Peatland (bog)	ombrotrophic	overall	seasonally	Peat moss	0	0	/	Canada	43.919	-80.405	/	6.6	905	Temperate	/	/	Peatland (bog)	ombrotrophic	overall	seasonally	Peat moss	Peat moss	No	2014/06-2015/05	Annual	/	biweekly	Field, Chamber	kg ha-1 yr-1	220	80	12	/	/	/	kg ha-1 GS-1	140	/	7	/	/	/	kg ha-1 NGS-1	80
152	Miao et al. 2016	Pristine	Pristine	Boreal	Marsh	minerotrophic	overall	seasonally	/	0	0	/	China	52.94	122.86	/	-4.33	508.54	Boreal	/	/	Marsh	minerotrophic	overall	seasonally	/	/	Yes	2010-2011	Annual	/	weekly	Field, Chamber	kg ha-1 yr-1	20.1333	/	4	/	/	/	kg ha-1 GS-1	20	/	1	/	/	/	kg ha-1 NGS-1	0.133333
153	Golovatskaya et al. 2009	Pristine	Pristine	Boreal	Peatland (bog)	ombrotrophic	overall	seasonally	Peat moss	0	0	1	Russia	56.967	82.6	/	0.53	488	Boreal	/	/	Peatland (bog)	ombrotrophic	overall	seasonally	Peat moss	Peat moss	No	1999-2007	Annual	/	weekly	Field, Chamber	kg ha-1 yr-1	50.8	2.67997	4	/	/	/	kg ha-1 GS-1	46.6667	/	1	/	/	/	kg ha-1 NGS-1	4.13333
154	Golovatskaya et al. 2009	Pristine	Pristine	Boreal	Peatland (bog)	ombrotrophic	overall	seasonally	Peat moss	0	0	3.5	Russia	56.967	82.6	/	0.53	488	Boreal	/	/	Peatland (bog)	ombrotrophic	overall	seasonally	Peat moss	Peat moss	No	1999-2007	Annual	/	weekly	Field, Chamber	kg ha-1 yr-1	75.6	4.01995	4	/	/	/	kg ha-1 GS-1	69.3333	/	1	/	/	/	kg ha-1 NGS-1	6.26667
155	Golovatskaya et al. 2009	Pristine	Pristine	Boreal	Peatland (fen)	ombrotrophic	overall	seasonally	Peat moss	0	0	2.5	Russia	56.967	82.6	/	0.53	488	Boreal	/	/	Peatland (fen)	ombrotrophic	overall	seasonally	Peat moss	Peat moss	No	1999-2007	Annual	/	weekly	Field, Chamber	kg ha-1 yr-1	151.067	6.7145	4	/	/	/	kg ha-1 GS-1	138.667	6.76199	1	/	/	/	kg ha-1 NGS-1	12.4
156	Heikkinen et al. 2002	Pristine	Pristine	Boreal	Peatland (bog)	minerotrophic	hollow	seasonally	Peat moss	0	0	/	Russia	67.383	63.367	/	-6	548	Boreal	/	/	Peatland (bog)	minerotrophic	hollow	seasonally	Peat moss	Peat moss	No	1999	Annual	/	weekly	Field, Chamber	kg ha-1 yr-1	186.667	/	5	/	/	/	kg ha-1 GS-1	106.667	/	1	/	/	/	kg ha-1 NGS-1	80
157	Heikkinen et al. 2002	Pristine	Pristine	Boreal	Peatland (bog)	minerotrophic	hollow	seasonally	Peat moss	0	0	/	Russia	67.383	63.367	/	-6	548	Boreal	/	/	Peatland (bog)	minerotrophic	hollow	seasonally	Peat moss	Peat moss	No	1999	Annual	/	weekly	Field, Chamber	kg ha-1 yr-1	80	/	5	/	/	/	kg ha-1 GS-1	66.6667	/	1	/	/	/	kg ha-1 NGS-1	13.3333
158	Heikkinen et al. 2002	Pristine	Pristine	Boreal	Peatland (bog)	minerotrophic	lawn	seasonally	Peat moss	0	0	/	Russia	67.383	63.367	/	-6	548	Boreal	/	/	Peatland (bog)	minerotrophic	lawn	seasonally	Peat moss	Peat moss	No	1999	Annual	/	weekly	Field, Chamber	kg ha-1 yr-1	57.3333	/	6	/	/	/	kg ha-1 GS-1	53.3333	/	1	/	/	/	kg ha-1 NGS-1	4
159	Heikkinen et al. 2002	Pristine	Pristine	Boreal	Peatland (bog)	minerotrophic	lawn	seasonally	Peat moss	0	0	/	Russia	67.383	63.367	/	-6	548	Boreal	/	/	Peatland (bog)	minerotrophic	lawn	seasonally	Peat moss	Peat moss	No	1999	Annual	/	weekly	Field, Chamber	kg ha-1 yr-1	16	/	6	/	/	/	kg ha-1 GS-1	13.3333	/	1	/	/	/	kg ha-1 NGS-1	2.66667
160	Heikkinen et al. 2002	Pristine	Pristine	Boreal	Peatland (bog)	ombrotrophic	hummock	seasonally	Shrub	0	0	/	Russia	67.383	63.367	/	-6	548	Boreal	/	/	Peatland (bog)	ombrotrophic	hummock	seasonally	Shrub	Shrub	No	1999	Annual	/	weekly	Field, Chamber	kg ha-1 yr-1	16	/	7	/	/	/	kg ha-1 GS-1	13.3333	/	2	/	/	/	kg ha-1 NGS-1	2.66667
161	Christensen et al. 2012	Pristine	Pristine	Boreal	Peatland (bog)	ombrotrophic	overall	seasonally	Cyperaceae	0	0	3	Sweden	68.333	19.05	363	-0.2	340	Boreal	/	/	Peatland (bog)	ombrotrophic	overall	seasonally	Cyperaceae	Cyperaceae	Yes	2006	Annual	/	Half-hourly to daily	EC	kg ha-1 yr-1	240	/	1	/	/	/	kg ha-1 GS-1	146.667	/	3	/	/	/	kg ha-1 NGS-1	93.3333
162	Christensen et al. 2012	Pristine	Pristine	Boreal	Peatland (bog)	ombrotrophic	overall	seasonally	Cyperaceae	0	0	3	Sweden	68.333	19.05	363	-0.2	340	Boreal	/	/	Peatland (bog)	ombrotrophic	overall	seasonally	Cyperaceae	Cyperaceae	Yes	2007	Annual	/	Half-hourly to daily	EC	kg ha-1 yr-1	293.333	/	1	/	/	/	kg ha-1 GS-1	200	/	1	/	/	/	kg ha-1 NGS-1	93.3333
163	Peng et al. 2016	Pristine	Pristine	Temperate	Peatland (fen)	minerotrophic	overall	seasonally	Cyperaceae	0	0	/	China	32.767	102.5	3510	/	/	Temperate	/	/	Peatland (fen)	minerotrophic	overall	seasonally	Cyperaceae	Cyperaceae	No	2014	Annual	/	Half-hourly to daily	EC	kg ha-1 yr-1	468	/	1	/	/	/	kg ha-1 GS-1	351	/	1	/	/	/	kg ha-1 NGS-1	117
164	Gažovič et al. 2013	Pristine	Pristine	Boreal	Peatland (fen)	ombrotrophic	overall	seasonally	Peat moss	0	0	/	Finland	62.783	30.933	/	2	591	Boreal	/	/	Peatland (fen)	ombrotrophic	overall	seasonally	Peat moss	Peat moss	No	2011/11/01-2012/10/32	Annual	/	Half-hourly to daily	EC	kg ha-1 yr-1	36	3	1	/	/	/	kg ha-1 GS-1	34	5.19615	1	/	/	/	kg ha-1 NGS-1	2
165	Gažovič et al. 2013	Pristine	Pristine	Boreal	Peatland (fen)	ombrotrophic	overall	seasonally	Peat moss	0	0	/	Finland	62.783	30.933	/	2	700	Boreal	/	/	Peatland (fen)	ombrotrophic	overall	seasonally	Peat moss	Peat moss	No	2011/11/01-2012/10/32	Annual	/	Half-hourly to daily	EC	kg ha-1 yr-1	66	6	1	/	/	/	kg ha-1 GS-1	64	10.3923	1	/	/	/	kg ha-1 NGS-1	2
166	Drollinger et al. 2019	Pristine	Pristine	Temperate	Peatland (bog)	ombrotrophic	overall	seasonally	Shrub	0	0	0.83	Austria	47.581	14.347	632	8.2	1133	Temperate	/	/	Peatland (bog)	ombrotrophic	overall	seasonally	Shrub	Shrub	No	2015/06/01-2016/05/31	Annual	/	Half-hourly to daily	EC	kg ha-1 yr-1	58.6667	32	1	/	/	/	kg ha-1 GS-1	52.2133	32.193	1	/	/	/	kg ha-1 NGS-1	6.45333
167	Drollinger et al. 2019	Pristine	Pristine	Temperate	Peatland (bog)	ombrotrophic	overall	seasonally	Shrub	0	0	0.83	Austria	47.581	14.347	632	7.4	1459	Temperate	/	/	Peatland (bog)	ombrotrophic	overall	seasonally	Shrub	Shrub	No	2016/06/01-2017/05/31	Annual	/	Half-hourly to daily	EC	kg ha-1 yr-1	69.8667	35.7333	1	/	/	/	kg ha-1 GS-1	65.6747	35.7976	1	/	/	/	kg ha-1 NGS-1	4.192
168	Olson et al. 2013	Pristine	Pristine	Temperate	Peatland (bog)	ombrotrophic	overall	seasonally	Peat moss	0	0	3	USA	47.505	-93.489	/	3.9	470	Temperate	/	/	Peatland (bog)	ombrotrophic	overall	seasonally	Peat moss	Peat moss	No	2009	Annual	/	Half-hourly to daily	EC	kg ha-1 yr-1	157	41	1	/	/	/	kg ha-1 GS-1	106.333		1	/	/	/	kg ha-1 NGS-1	50.6667
169	Olson et al. 2013	Pristine	Pristine	Temperate	Peatland (bog)	ombrotrophic	overall	seasonally	Peat moss	0	0	3	USA	47.505	-93.489	/	3.5	698	Temperate	/	/	Peatland (bog)	ombrotrophic	overall	seasonally	Peat moss	Peat moss	No	2010	Annual	/	Half-hourly to daily	EC	kg ha-1 yr-1	163	40	2	/	/	/	kg ha-1 GS-1	120.333		1	/	/	/	kg ha-1 NGS-1	42.6667
170	Olson et al. 2013	Pristine	Pristine	Temperate	Peatland (bog)	ombrotrophic	overall	seasonally	Peat moss	0	0	3	USA	47.505	-93.489	/	5.9	770	Temperate	/	/	Peatland (bog)	ombrotrophic	overall	seasonally	Peat moss	Peat moss	No	2011	Annual	/	Half-hourly to daily	EC	kg ha-1 yr-1	332	75	3	/	/	/	kg ha-1 GS-1	245.333		1	/	/	/	kg ha-1 NGS-1	86.6667
171	Fortuniak et al. 2017	Pristine	Pristine	Temperate	Peatland (fen)	minerotrophic	overall	seasonally	Cyperaceae	0	0	2.5	Poland	53.592	22.892	110	6.9	703	Temperate	/	/	Peatland (fen)	minerotrophic	overall	seasonally	Cyperaceae	Cyperaceae	No	2013	Annual	/	Half-hourly to daily	EC	kg ha-1 yr-1	290	40	1	/	/	/	kg ha-1 GS-1	/		1	/	/	/	kg ha-1 NGS-1	/
172	Fortuniak et al. 2017	Pristine	Pristine	Temperate	Peatland (fen)	minerotrophic	overall	seasonally	Cyperaceae	0	0	2.5	Poland	53.592	22.892	110	7.3	527	Temperate	/	/	Peatland (fen)	minerotrophic	overall	seasonally	Cyperaceae	Cyperaceae	No	2014	Annual	/	Half-hourly to daily	EC	kg ha-1 yr-1	200	10	1	/	/	/	kg ha-1 GS-1	/		1	/	/	/	kg ha-1 NGS-1	/
173	Wang et al. 2018	Pristine	Pristine	Boreal	Peatland (bog)	ombrotrophic	overall	seasonally	Peat moss	0	0	/	Canada	48.26	-58.663	/	4.4	942	Boreal	/	/	Peatland (bog)	ombrotrophic	overall	seasonally	Peat moss	Peat moss	No	2014/05-2015/04	Annual	/	Half-hourly to daily	EC	kg ha-1 yr-1	37	9	1	/	/	/	kg ha-1 GS-1	22	14.5258	1	/	/	/	kg ha-1 NGS-1	15
174	Wang et al. 2018	Pristine	Pristine	Boreal	Peatland (bog)	ombrotrophic	overall	seasonally	Peat moss	0	0	/	Canada	48.26	-58.663	/	4.7	890	Boreal	/	/	Peatland (bog)	ombrotrophic	overall	seasonally	Peat moss	Peat moss	No	2015/05-2016/05	Annual	/	Half-hourly to daily	EC	kg ha-1 yr-1	31	9	1	/	/	/	kg ha-1 GS-1	19	15.0333	1	/	/	/	kg ha-1 NGS-1	12
175	Rinne et al. 2018	Pristine	Pristine	Boreal	Peatland (fen)	minerotrophic	overall	seasonally	Peat moss	/	/	6	China	61.813	24.2	162	4.4	703	Boreal	/	/	Peatland (fen)	minerotrophic	overall	seasonally	Peat moss	Peat moss	No	2005	Annual	/	Half-hourly to daily	EC	kg ha-1 yr-1	120	/	1	/	/	/	kg ha-1 GS-1	90.6667	/	1	/	/	/	kg ha-1 NGS-1	29.3333
176	Rinne et al. 2018	Pristine	Pristine	Boreal	Peatland (fen)	minerotrophic	overall	seasonally	Peat moss	/	/	6	China	61.813	24.2	162	4.6	653	Boreal	/	/	Peatland (fen)	minerotrophic	overall	seasonally	Peat moss	Peat moss	No	2006	Annual	/	Half-hourly to daily	EC	kg ha-1 yr-1	80	/	1	/	/	/	kg ha-1 GS-1	60.1333	/	1	/	/	/	kg ha-1 NGS-1	19.8667
177	Rinne et al. 2018	Pristine	Pristine	Boreal	Peatland (fen)	minerotrophic	overall	seasonally	Peat moss	/	/	6	China	61.813	24.2	162	4.5	700	Boreal	/	/	Peatland (fen)	minerotrophic	overall	seasonally	Peat moss	Peat moss	No	2007	Annual	/	Half-hourly to daily	EC	kg ha-1 yr-1	93.3333	/	1	/	/	/	kg ha-1 GS-1	74.2667	/	1	/	/	/	kg ha-1 NGS-1	19.0667
178	Rinne et al. 2018	Pristine	Pristine	Boreal	Peatland (fen)	minerotrophic	overall	seasonally	Peat moss	/	/	6	China	61.813	24.2	162	4.9	933	Boreal	/	/	Peatland (fen)	minerotrophic	overall	seasonally	Peat moss	Peat moss	No	2008	Annual	/	Half-hourly to daily	EC	kg ha-1 yr-1	118.667	/	1	/	/	/	kg ha-1 GS-1	93.7333	/	1	/	/	/	kg ha-1 NGS-1	24.9333
179	Rinne et al. 2018	Pristine	Pristine	Boreal	Peatland (fen)	minerotrophic	overall	seasonally	Peat moss	/	/	6	China	61.813	24.2	162	3.8	502	Boreal	/	/	Peatland (fen)	minerotrophic	overall	seasonally	Peat moss	Peat moss	No	2009	Annual	/	Half-hourly to daily	EC	kg ha-1 yr-1	128	/	1	/	/	/	kg ha-1 GS-1	103.2	/	1	/	/	/	kg ha-1 NGS-1	24.8
180	Rinne et al. 2018	Pristine	Pristine	Boreal	Peatland (fen)	minerotrophic	overall	seasonally	Peat moss	/	/	6	China	61.813	24.2	162	2.5	657	Boreal	/	/	Peatland (fen)	minerotrophic	overall	seasonally	Peat moss	Peat moss	No	2010	Annual	/	Half-hourly to daily	EC	kg ha-1 yr-1	146.667	/	1	/	/	/	kg ha-1 GS-1	120.267	/	1	/	/	/	kg ha-1 NGS-1	26.4
181	Rinne et al. 2018	Pristine	Pristine	Boreal	Peatland (fen)	minerotrophic	overall	seasonally	Peat moss	/	/	6	China	61.813	24.2	162	4.9	745	Boreal	/	/	Peatland (fen)	minerotrophic	overall	seasonally	Peat moss	Peat moss	No	2011	Annual	/	Half-hourly to daily	EC	kg ha-1 yr-1	117.333	/	1	/	/	/	kg ha-1 GS-1	89.3333	/	1	/	/	/	kg ha-1 NGS-1	28
182	Rinne et al. 2018	Pristine	Pristine	Boreal	Peatland (fen)	minerotrophic	overall	seasonally	Peat moss	/	/	6	China	61.813	24.2	162	3.2	907	Boreal	/	/	Peatland (fen)	minerotrophic	overall	seasonally	Peat moss	Peat moss	No	2012	Annual	/	Half-hourly to daily	EC	kg ha-1 yr-1	146.667	/	1	/	/	/	kg ha-1 GS-1	126.413	/	1	/	/	/	kg ha-1 NGS-1	20.2533
183	Rinne et al. 2018	Pristine	Pristine	Boreal	Peatland (fen)	minerotrophic	overall	seasonally	Peat moss	/	/	6	China	61.813	24.2	162	4.9	615	Boreal	/	/	Peatland (fen)	minerotrophic	overall	seasonally	Peat moss	Peat moss	No	2013	Annual	/	Half-hourly to daily	EC	kg ha-1 yr-1	186.667	/	1	/	/	/	kg ha-1 GS-1	151.467	/	1	/	/	/	kg ha-1 NGS-1	35.2
184	Rinne et al. 2018	Pristine	Pristine	Boreal	Peatland (fen)	minerotrophic	overall	seasonally	Peat moss	/	/	6	China	61.813	24.2	162	5.1	579	Boreal	/	/	Peatland (fen)	minerotrophic	overall	seasonally	Peat moss	Peat moss	No	2014	Annual	/	Half-hourly to daily	EC	kg ha-1 yr-1	160	/	1	/	/	/	kg ha-1 GS-1	121.867	/	1	/	/	/	kg ha-1 NGS-1	38.1333
185	Rinne et al. 2018	Pristine	Pristine	Boreal	Peatland (fen)	minerotrophic	overall	seasonally	Peat moss	/	/	6	China	61.813	24.2	162	5.5	658	Boreal	/	/	Peatland (fen)	minerotrophic	overall	seasonally	Peat moss	Peat moss	No	2015	Annual	/	Half-hourly to daily	EC	kg ha-1 yr-1	/	/	1	/	/	/	kg ha-1 GS-1	/	/	1	/	/	/	kg ha-1 NGS-1	/
[truncated: 13 more columns]

## Sheet: Wet season flux for tropical
ID	References	Drainage (treatment)	Purpose	Climatic conditions	Wetland type	Nutrient supply type	Microtopography	Permanently/seasonally flooded	Dominant plant species in prestine wetland	Function group	Peat depth (m) in pristine wetland	N rate (kg N ha-1) in drained wetland	Biomass/manure application (t ha-1) in drained wetland	Country	Latitude (°, N)	Longitude (°, E)	Latitude (°, N)	Longitude (°, E)	Altitude (m)	MAT ( °C)	MAP (mm)	Climatic conditions	Drainage duration (years)	Drainage intensity	Wetland type	Nutrient supply type	Microtopography	Permanently/seasonally flooded	Dominant plant species in prestine wetland	Function group	Measurement period	Season	Dry/wet	Measurement frequency	Method	Annual soil CH4 flux	Control	SD	n	Treatment	SD	n	Wet season CH4 flux	Control	SD	n	Treatment	SD	n
1	Melling et al. 2005a	Drainage	Cropland	Tropical	Swamp	Ombrotrophic	overall	seasonally	Shorea albida	Forest	4.8	0	0	Malaysia	2.817	111.85	2°49′	111°51′	/	27.4	/	Tropical	/	/	Swamp	/	overall	seasonally	Shorea albida	Forest	2002/08-2003-07	Annual	/	monthly	Field, Chamber	kg ha-1 yr-1	0.244533	/	4	/	/	/	kg ha-1 wet season-1	0.0632809	/	4	/	/	/
2	Xhuan Wonga et al. 2018	Pristine	Pristine	Tropical	Swamp	Ombrotrophic	overall	seasonally	Shorea albida	Forest	/	0	0	Malaysia	1.454	111.149	1° 27′12.87″	111° 8′58.17″	10	27.1	2540	Tropical	/	/	Swamp	/	overall	seasonally	Shorea albida	Forest	2014//02-2015/07	Annual	/	Half-hourly to daily	EC	kg ha-1 yr-1	100	/	1	/	/	/	kg ha-1 wet season-1	95.7	/	1	/	/	/
3	Xhuan Wonga et al. 2018	Pristine	Pristine	Tropical	Swamp	Ombrotrophic	overall	seasonally	Shorea albida	Forest	/	0	0	Malaysia	1.454	111.149	1° 27′12.87″	111° 8′58.17″	10	27.1	2540	Tropical	/	/	Swamp	/	overall	seasonally	Shorea albida	Forest	2014//02-2015/07	Annual	/	Half-hourly to daily	EC	kg ha-1 yr-1	144	/	1	/	/	/	kg ha-1 wet season-1	135.216	/	1	/	/	/
4	Dhandapani et al. 2019	Drainage	Forestry	Tropical	Swamp	Ombrotrophic	overall	permanently	Antisoptera sp. Shorea sp.	Forest	2	0	0	Malaysia	3.694	101.185	3°41′39.5″	101°11′05.4″	/	/	/	Tropical	27	/	Swamp	/	overall	permanently	Antisoptera sp. Shorea sp.	Forest	2016/12-2017/04, 2019/09-2017/10,	wet season	wet	monthly	Field, Chamber	kg ha-1 yr-1	218.59	226.197	25	-1.37308	0.504914	75	kg ha-1 wet season-1	149.05	211.38	25	-0.500308	0.375231	75
[truncated: 8 more columns]

## Sheet: Classes
	Purposes	Climate	Wetland type	Nutrirnt type	Microtopography	Permanently/seasonally flooded	Function group	Mean ratio of GS or wet season CH4 to annual flux	SD	Number of data-points	Lower 95% CI	Upper 95% CI
	Pristine	Tropical	Swamp	ombrotrophic	overall	seasonally	Forest	0.709163	0.318983	4	0.390181	1.02815
	Forestry	Tropical	Swamp	ombrotrophic	overall	seasonally	Forest	0.36437	0.59654	1	-0.23217	0.960909
	Pristine	Temperate	Marsh	minerotrophic	overall	seasonally	Cyperaceae	0.869467	0.120476	9	0.748991	0.989943
	Forestry	Temperate	Marsh	minerotrophic	overall	seasonally	Cyperaceae	1.00921	1.03687	2	-0.0276626	2.04607
	Pristine	Temperate	Marsh	minerotrophic	hummock	seasonally	Cyperaceae	0.903993	0.065835	18	0.838158	0.969828
	Forestry	Temperate	Marsh	minerotrophic	hummock	seasonally	Cyperaceae	1.04342	0.610001	2	0.433423	1.65343
	Pristine	Temperate	Marsh	minerotrophic	hollow	seasonally	Cyperaceae	0.903993	0.065835	18	0.838158	0.969828
	Forestry	Temperate	Marsh	minerotrophic	hollow	seasonally	Cyperaceae	1.95737	0.348768	2	1.6086	2.30614
	Pristine	Temperate	Marsh	minerotrophic	overall	seasonally	Cyperaceae	0.869467	0.120476	9	0.748991	0.989943
	Grassland	Temperate	Marsh	minerotrophic	overall	seasonally	Cyperaceae	0.987372	1.0019	16	-0.0145243	1.98927
	Grassland	Temperate	Marsh	minerotrophic	overall	permanently	Cyperaceae	0.987372	1.0019	16	-0.0145243	1.98927
	Pristine	Temperate	Marsh	minerotrophic	overall	seasonally	Shrub	0.966637	0.0782704	5	0.888367	1.04491
	Forestry	Temperate	Marsh	minerotrophic	overall	seasonally	Shrub	1.33667	0.502738	6	0.833929	1.83941
	Forestry	Temperate	Marsh	minerotrophic	hummock	seasonally	Shrub	1.33667	0.502738	6	0.833929	1.83941
	Forestry	Temperate	Marsh	minerotrophic	hollow	seasonally	Shrub	1.33667	0.502738	6	0.833929	1.83941
	Pristine	Temperate	Peatland (fen)	minerotrophic	overall	seasonally	Cyperaceae	0.935309	0.0106965	3	0.924613	0.946006
	Forestry	Temperate	Peatland (fen)	minerotrophic	overall	seasonally	Cyperaceae	0.967926	0.552219	5	0.415707	1.52014
	Pristine	Temperate	Peatland (bog)	ombrotrophic	overall	seasonally	Cyperaceae	0.830147	0.134176	14	0.695972	0.964323
	Forestry	Temperate	Peatland (bog)	ombrotrophic	overall	seasonally	Cyperaceae	0.408449	1.4687	14	-1.06025	1.87715
	Pristine	Temperate	Peatland (fen)	ombrotrophic	overall	seasonally	Graminoid	0.686917	0.161379	4	0.525538	0.848296
	Forestry	Temperate	Peatland (fen)	ombrotrophic	overall	seasonally	Graminoid	0.408449	1.4687	14	-1.06025	1.87715
	Pristine	Temperate	Peatland (fen)	ombrotrophic	hummock	seasonally	Graminoid	0.686917	0.161379	4	0.525538	0.848296
	Forestry	Temperate	Peatland (fen)	ombrotrophic	hummock	seasonally	Graminoid	0.408449	1.4687	14	-1.06025	1.87715
	Pristine	Temperate	Peatland (fen)	ombrotrophic	hollow	seasonally	Graminoid	0.686917	0.161379	4	0.525538	0.848296
	Forestry	Temperate	Peatland (fen)	ombrotrophic	hollow	seasonally	Graminoid	0.408449	1.4687	14	-1.06025	1.87715
	Pristine	Temperate	Peatland (fen)	minerotrophic	hummock	seasonally	Peat moss	0.758128	0.182381	7	0.575747	0.940509
	Forestry	Temperate	Peatland (fen)	minerotrophic	hummock	seasonally	Peat moss	0.408449	1.4687	14	-1.06025	1.87715
	Forestry	Temperate	Peatland (fen)	minerotrophic	hollow	seasonally	Peat moss	0.408449	1.4687	14	-1.06025	1.87715
	Forestry	Temperate	Peatland (fen)	minerotrophic	lawn	seasonally	Peat moss	0.408449	1.4687	14	-1.06025	1.87715
	Pristine	Temperate	Peatland (bog)	ombrotrophic	hummock	seasonally	Peat moss	0.723976	0.313594	12	0.410382	1.03757
	Forestry	Temperate	Peatland (bog)	ombrotrophic	hummock	seasonally	Peat moss	0.408449	1.4687	14	-1.06025	1.87715
	Forestry	Temperate	Peatland (bog)	ombrotrophic	hollow	seasonally	Peat moss	0.408449	1.4687	14	-1.06025	1.87715
	Forestry	Temperate	Peatland (bog)	ombrotrophic	lawn	seasonally	Peat moss	0.408449	1.4687	14	-1.06025	1.87715
	Pristine	Temperate	Peatland (bog)	ombrotrophic	overall	seasonally	Peat moss	0.723976	0.313594	12	0.410382	1.03757
	Forestry	Temperate	Peatland (bog)	ombrotrophic	overall	seasonally	Peat moss	0.408449	1.4687	14	-1.06025	1.87715
	Forestry	Temperate	Peatland (bog)	ombrotrophic	lawn	seasonally	Cyperaceae	0.408449	1.4687	14	-1.06025	1.87715
	Forestry	Temperate	Peatland (bog)	ombrotrophic	hummock	seasonally	Shrub	0.408449	1.4687	14	-1.06025	1.87715
	Forestry	Temperate	Peatland (bog)	ombrotrophic	lawn	seasonally	Cyperaceae	0.408449	1.4687	14	-1.06025	1.87715
	Forestry	Temperate	Peatland (bog)	ombrotrophic	overall	seasonally	Cyperaceae	0.408449	1.4687	14	-1.06025	1.87715
	Pristine	Temperate	Peatland (fen)	ombrotrophic	overall	seasonally	Peat moss	0.930559	0.0335449	4	0.897014	0.964104
	Forestry	Temperate	Peatland (fen)	ombrotrophic	overall	seasonally	Peat moss	0.408449	1.4687	14	-1.06025	1.87715
	Pristine	Temperate	Marsh	minerotrophic	overall	seasonally	Graminoid	0.778813	0.187496	9	0.591316	0.966309
	Grassland	Temperate	Marsh	minerotrophic	overall	seasonally	Graminoid	0.97367	0.887488	18	0.0861819	1.86116
	Pristine	Temperate	Marsh	minerotrophic	hummock	permanently	Cyperaceae	0.869467	0.120476	16	0.748991	0.989943
	Grassland	Temperate	Marsh	minerotrophic	hummock	permanently	Cyperaceae	0.987372	1.0019	16	-0.0145243	1.98927
	Grassland	Temperate	Marsh	minerotrophic	hollow	permanently	Forbs	0.987372	1.0019	16	-0.0145243	1.98927
	Grassland	Temperate	Marsh	minerotrophic	overall	permanently	Cyperaceae	0.987372	1.0019	16	-0.0145243	1.98927
	Pristine	Temperate	Marsh	minerotrophic	hummock	seasonally	Cyperaceae	0.903993	0.065835	18	0.838158	0.969828
	Grassland	Temperate	Marsh	minerotrophic	hummock	seasonally	Cyperaceae	0.987372	1.0019	16	-0.0145243	1.98927
	Grassland	Temperate	Marsh	minerotrophic	hollow	seasonally	Cyperaceae	0.987372	1.0019	16	-0.0145243	1.98927
	Grassland	Temperate	Marsh	minerotrophic	overall	seasonally	Cyperaceae	0.987372	1.0019	16	-0.0145243	1.98927
	Pristine	Temperate	Peatland (fen)	minerotrophic	overall	seasonally	Peat moss	0.704653	0.153151	10	0.551502	0.857804
	Climate drying	Temperate	Peatland (fen)	minerotrophic	overall	seasonally	Peat moss	0.408449	1.4687	14	-1.06025	1.87715
	Pristine	Temperate	Peatland (bog)	ombrotrophic	overall	seasonally	Peat moss	0.723976	0.313594	12	0.410382	1.03757
	Climate drying	Temperate	Peatland (bog)	ombrotrophic	overall	seasonally	Peat moss	0.408449	1.4687	14	-1.06025	1.87715
	Pristine	Temperate	/	/	overall	/	Forbs	0.790595	0.0992976	45	0.691298	0.889893
	Cropland	Temperate	/	/	overall	/	Forbs	0.922317	0.121845	2	0.800472	1.04416
	Pristine	Boreal	Peatland (bog)	ombrotrophic	hummock	seasonally	Shrub	0.873097	0.0464666	4	0.826631	0.919564
	Forestry	Boreal	Peatland (bog)	ombrotrophic	hummock	seasonally	Shrub	0.85594	0.061656	3	0.794284	0.917596
	Pristine	Boreal	Peatland (bog)	ombrotrophic	hollow	seasonally	Peat moss	0.761218	0.124511	6	0.636707	0.885729
	Forestry	Boreal	Peatland (bog)	ombrotrophic	hollow	seasonally	Peat moss	3.40664	5.38341	18	-1.97676	8.79005
	Pristine	Boreal	Peatland (bog)	ombrotrophic	overall	seasonally	Shrub	0.852537	0.0348352	3	0.817702	0.887372
	Forestry	Boreal	Peatland (bog)	ombrotrophic	overall	seasonally	Shrub	3.91678	6.46537	15	-2.54858	10.3822
	Pristine	Boreal	Peatland (fen)	mesotrophic	overall	seasonally	Cyperaceae	0.745725	0.0788972	13	0.666828	0.824622
	Forestry	Boreal	Peatland (fen)	mesotrophic	overall	seasonally	Cyperaceae	0.973272	0.451006	6	0.522265	1.42428
	Pristine	Boreal	Swamp	minerotrophic	overall	seasonally	Shrub	0.786697	0.0657513	21	0.720945	0.852448
	Forestry	Boreal	Swamp	minerotrophic	overall	seasonally	Shrub	0.973272	0.451006	6	0.522265	1.42428
	Pristine	Boreal	Peatland (bog)	ombrotrophic	overall	seasonally	Peat moss	0.803807	0.107302	8	0.696505	0.911108
	Forestry	Boreal	Peatland (bog)	ombrotrophic	overall	seasonally	Peat moss	3.91678	6.46537	15	-2.54858	10.3822
	Pristine	Boreal	Peatland (fen)	minerotrophic	overall	seasonally	Forest	0.612225	0.0307276	5	0.581498	0.642953
	Forestry	Boreal	Peatland (fen)	minerotrophic	overall	seasonally	Forest	0.973272	0.451006	6	0.522265	1.42428
	Pristine	Boreal	Peatland (bog)	ombrotrophic	overall	seasonally	Forest	0.714299	0.0510281	17	0.663271	0.765327
	Forestry	Boreal	Peatland (bog)	ombrotrophic	overall	seasonally	Forest	3.91678	6.46537	15	-2.54858	10.3822
	Pristine	Boreal	Peatland (fen)	minerotrophic	overall	seasonally	Cyperaceae	0.745725	0.0788972	13	0.666828	0.824622
	Forestry	Boreal	Peatland (fen)	minerotrophic	overall	seasonally	Cyperaceae	0.973272	0.451006	6	0.522265	1.42428
	Pristine	Boreal	Peatland (fen)	minerotrophic	overall	seasonally	Cyperaceae	0.745725	0.0788972	13	0.666828	0.824622
	Climate drying	Boreal	Peatland (fen)	minerotrophic	overall	seasonally	Cyperaceae	0.6108	0.0831019	4	0.527698	0.693902
	Pristine	Boreal	Peatland (fen)	minerotrophic	overall	seasonally	Peat moss	0.919859	0.0856805	3	0.834178	1.00554
	Climate drying	Boreal	Peatland (fen)	minerotrophic	overall	seasonally	Peat moss	0.718329	0.134016	8	0.584313	0.852345
	Pristine	Boreal	Marsh	/	overall	seasonally	Cyperaceae	0.697361	0.0440505	33	0.65331	0.741411
	Climate drying	Boreal	Marsh	/	overall	seasonally	Cyperaceae	0.960963	0.335598	10	0.625365	1.29656
	Pristine	Boreal	Peatland (bog)	ombrotrophic	overall	seasonally	Peat moss	0.803807	0.107302	8	0.696505	0.911108
	Climate drying	Boreal	Peatland (bog)	ombrotrophic	overall	seasonally	Peat moss	3.75532	6.05607	16	-2.30075	9.81139
	Pristine	Boreal	Peatland (fen)	ombrotrophic	hummock	seasonally	Peat moss	0.930559	0.0335449	4	0.897014	0.964104
	Climate drying	Boreal	Peatland (fen)	ombrotrophic	hummock	seasonally	Peat moss	0.921307	0.0603925	4	0.860914	0.981699
	Pristine	Boreal	Peatland (fen)	ombrotrophic	lawn	seasonally	Peat moss	0.653496	0.266682	5	0.386814	0.920177
	Climate drying	Boreal	Peatland (fen)	ombrotrophic	lawn	seasonally	Peat moss	0.921307	0.0603925	4	0.860914	0.981699
	Pristine	Boreal	Peatland (fen)	ombrotrophic	hollow	seasonally	Cyperaceae	0.874217	0.151441	5	0.722777	1.02566
	Climate drying	Boreal	Peatland (fen)	ombrotrophic	hollow	seasonally	Cyperaceae	0.921307	0.0603925	4	0.860914	0.981699
	Pristine	Boreal	Peatland (fen)	minerotrophic	overall	permanently	Cyperaceae	0.745725	0.0788972	13	0.666828	0.824622
	Climate drying	Boreal	Peatland (fen)	minerotrophic	overall	permanently	Cyperaceae	0.949633	0.236706	14	0.712927	1.18634
	Pristine	Boreal	Peatland (fen)	minerotrophic	overall	permanently	shrub	0.755848	0.0627396	23	0.693108	0.818587
	Climate drying	Boreal	Peatland (fen)	minerotrophic	overall	permanently	shrub	0.949633	0.236706	14	0.712927	1.18634
	Pristine	Boreal	Peatland (bog)	ombrotrophic	overall	seasonally	Peat moss	0.803807	0.107302	8	0.696505	0.911108
	Peat extraction	Boreal	Peatland (bog)	ombrotrophic	overall	seasonally	Peat moss	1.33333	0.385861	6	0.947472	1.71919
	Pristine	Boreal	Peatland (bog)	ombrotrophic	overall	seasonally	Peat moss	0.803807	0.107302	8	0.696505	0.911108
	Cropland	Boreal	Peatland (bog)	ombrotrophic	overall	seasonally	Peat moss	6.89286	7.22259	2	-0.329734	14.1154
	Pristine	Temperate	/	/	overall	/	Forbs	0.88217	1.157	7	-0.274831	2.03917
	Cropland	Temperate	/	/	overall	/	Forbs	-1.55093	6	6	-7.55093	4.44907
	Pristine	Temperate	Peatland (bog)	minerotrophic	overall	seasonally		1.36339	0.654068	3	0.709325	2.01746
	Cropland	Temperate	Peatland (bog)	minerotrophic	overall	seasonally		0.889483	3.58647	5	-2.69699	4.47596
