# Supplementary material for: Declines of peatland water table forces climate warming despite methane emission drawdown
Source: Research Square preprint supplement (doi:10.21203/rs.3.rs-2839705/v1), 2023-05-08
Supplement: Supplementary file 8 [file f4f419ba793c09be7c92e672.xlsx]

## Sheet: Sheet1
		From Gunther et al. (2020). Prompt rewetting of drained peatlands reduces climate warming despite methane emissions	From Leifeld and Menichetti (2018). The underappreciated potential of peatlands in global climate change mitigation strategies
Climate zone	Land use category	km2	km2	Mean	SD	10^3 km2
Boreal	Cropland	36820	72000	54410	17590	54.41	17.59
	Forest	54750	61000	57875	3125	57.875	3.125
	Grassland	4260	22000	13130	8870	13.13	8.87
	Peat extraction	3330	3350	3340	10	3.34	0.01
Temperate	Cropland	109170	37000	73085	36085	73.085	36.085
	Forest	63150	43000	53075	10075	53.075	10.075
	Grassland	58270	26000	42135	16135	42.135	16.135
	Peat extraction	6620	2260	4440	2180	4.44	2.18
Tropical	Cropland	96190	128710	112450	16260	112.45	16.26
	Forest	72350	109000	90675	18325	90.675	18.325
	Grassland	700	3900	2300	1600	2.3	1.6
	Peat extraction	80	390	235	155	0.235	0.155
Boreal	Agriculture	41080	94000	67540	26460	67.54	26.46
	Forest	54750	61000	57875	3125	57.875	3.125
	Peat extraction	3330	3350	3340	10	3.34	0.01
Temperate	Agriculture	167440	63000	115220	52220	115.22	52.22
	Forest	63150	43000	53075	10075	53.075	10.075
	Peat extraction	6620	2260	4440	2180	4.44	2.18
Tropical	Agriculture	96890	132610	114750	17860	114.75	17.86
	Forest	72350	109000	90675	18325	90.675	18.325
	Peat extraction	80	390	235	155	0.235	0.155
